# Supplementary material for: Genome-wide screening for deubiquitinase subfamily identifies ubiquitin-specific protease 49 as a novel regulator of odontogenesis
Source: PubMed Central journal article supplement (PMC9433428; doi:10.1038/s41418-022-00956-7), 2022-03-10

# Supplementary Fig. S1

## A

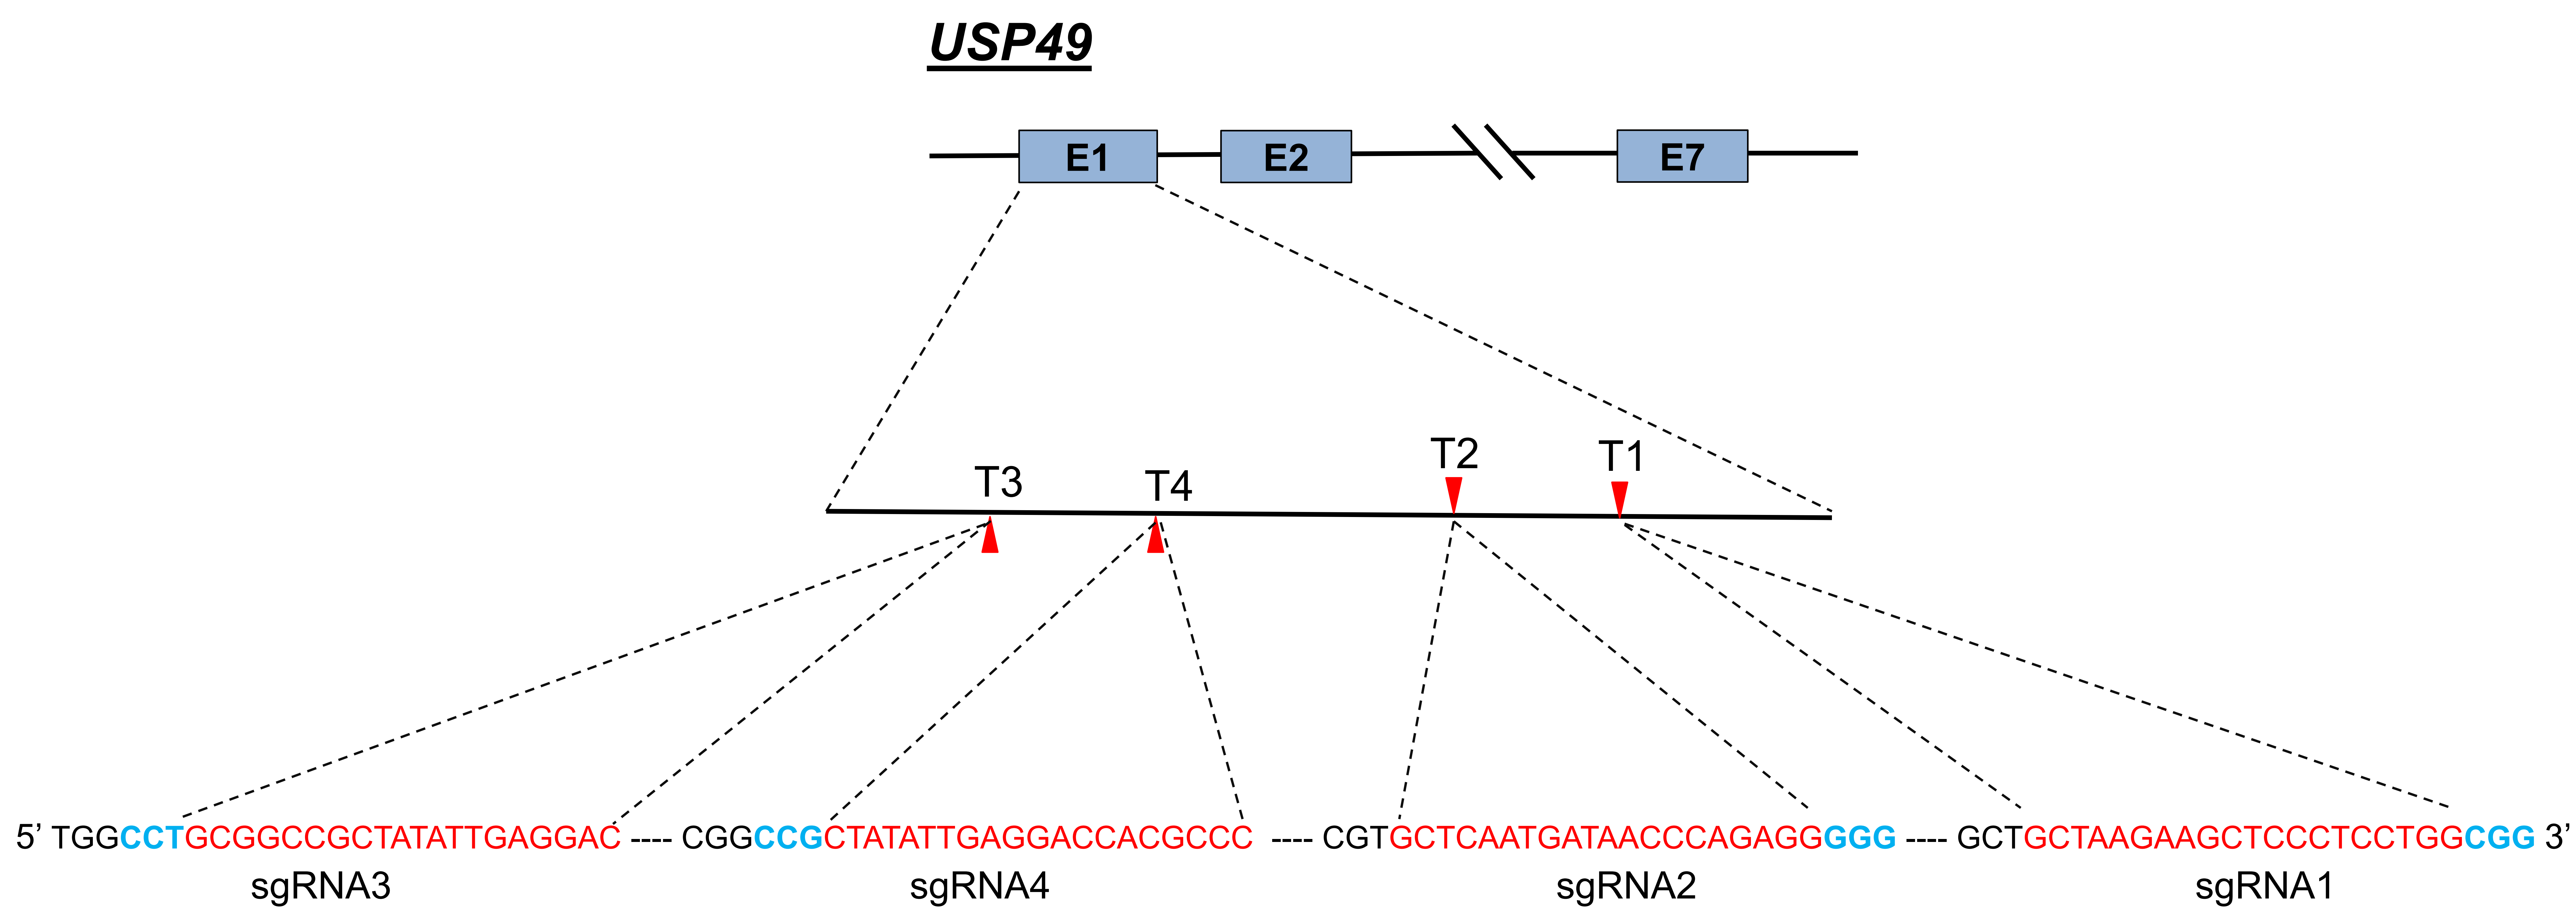

## B

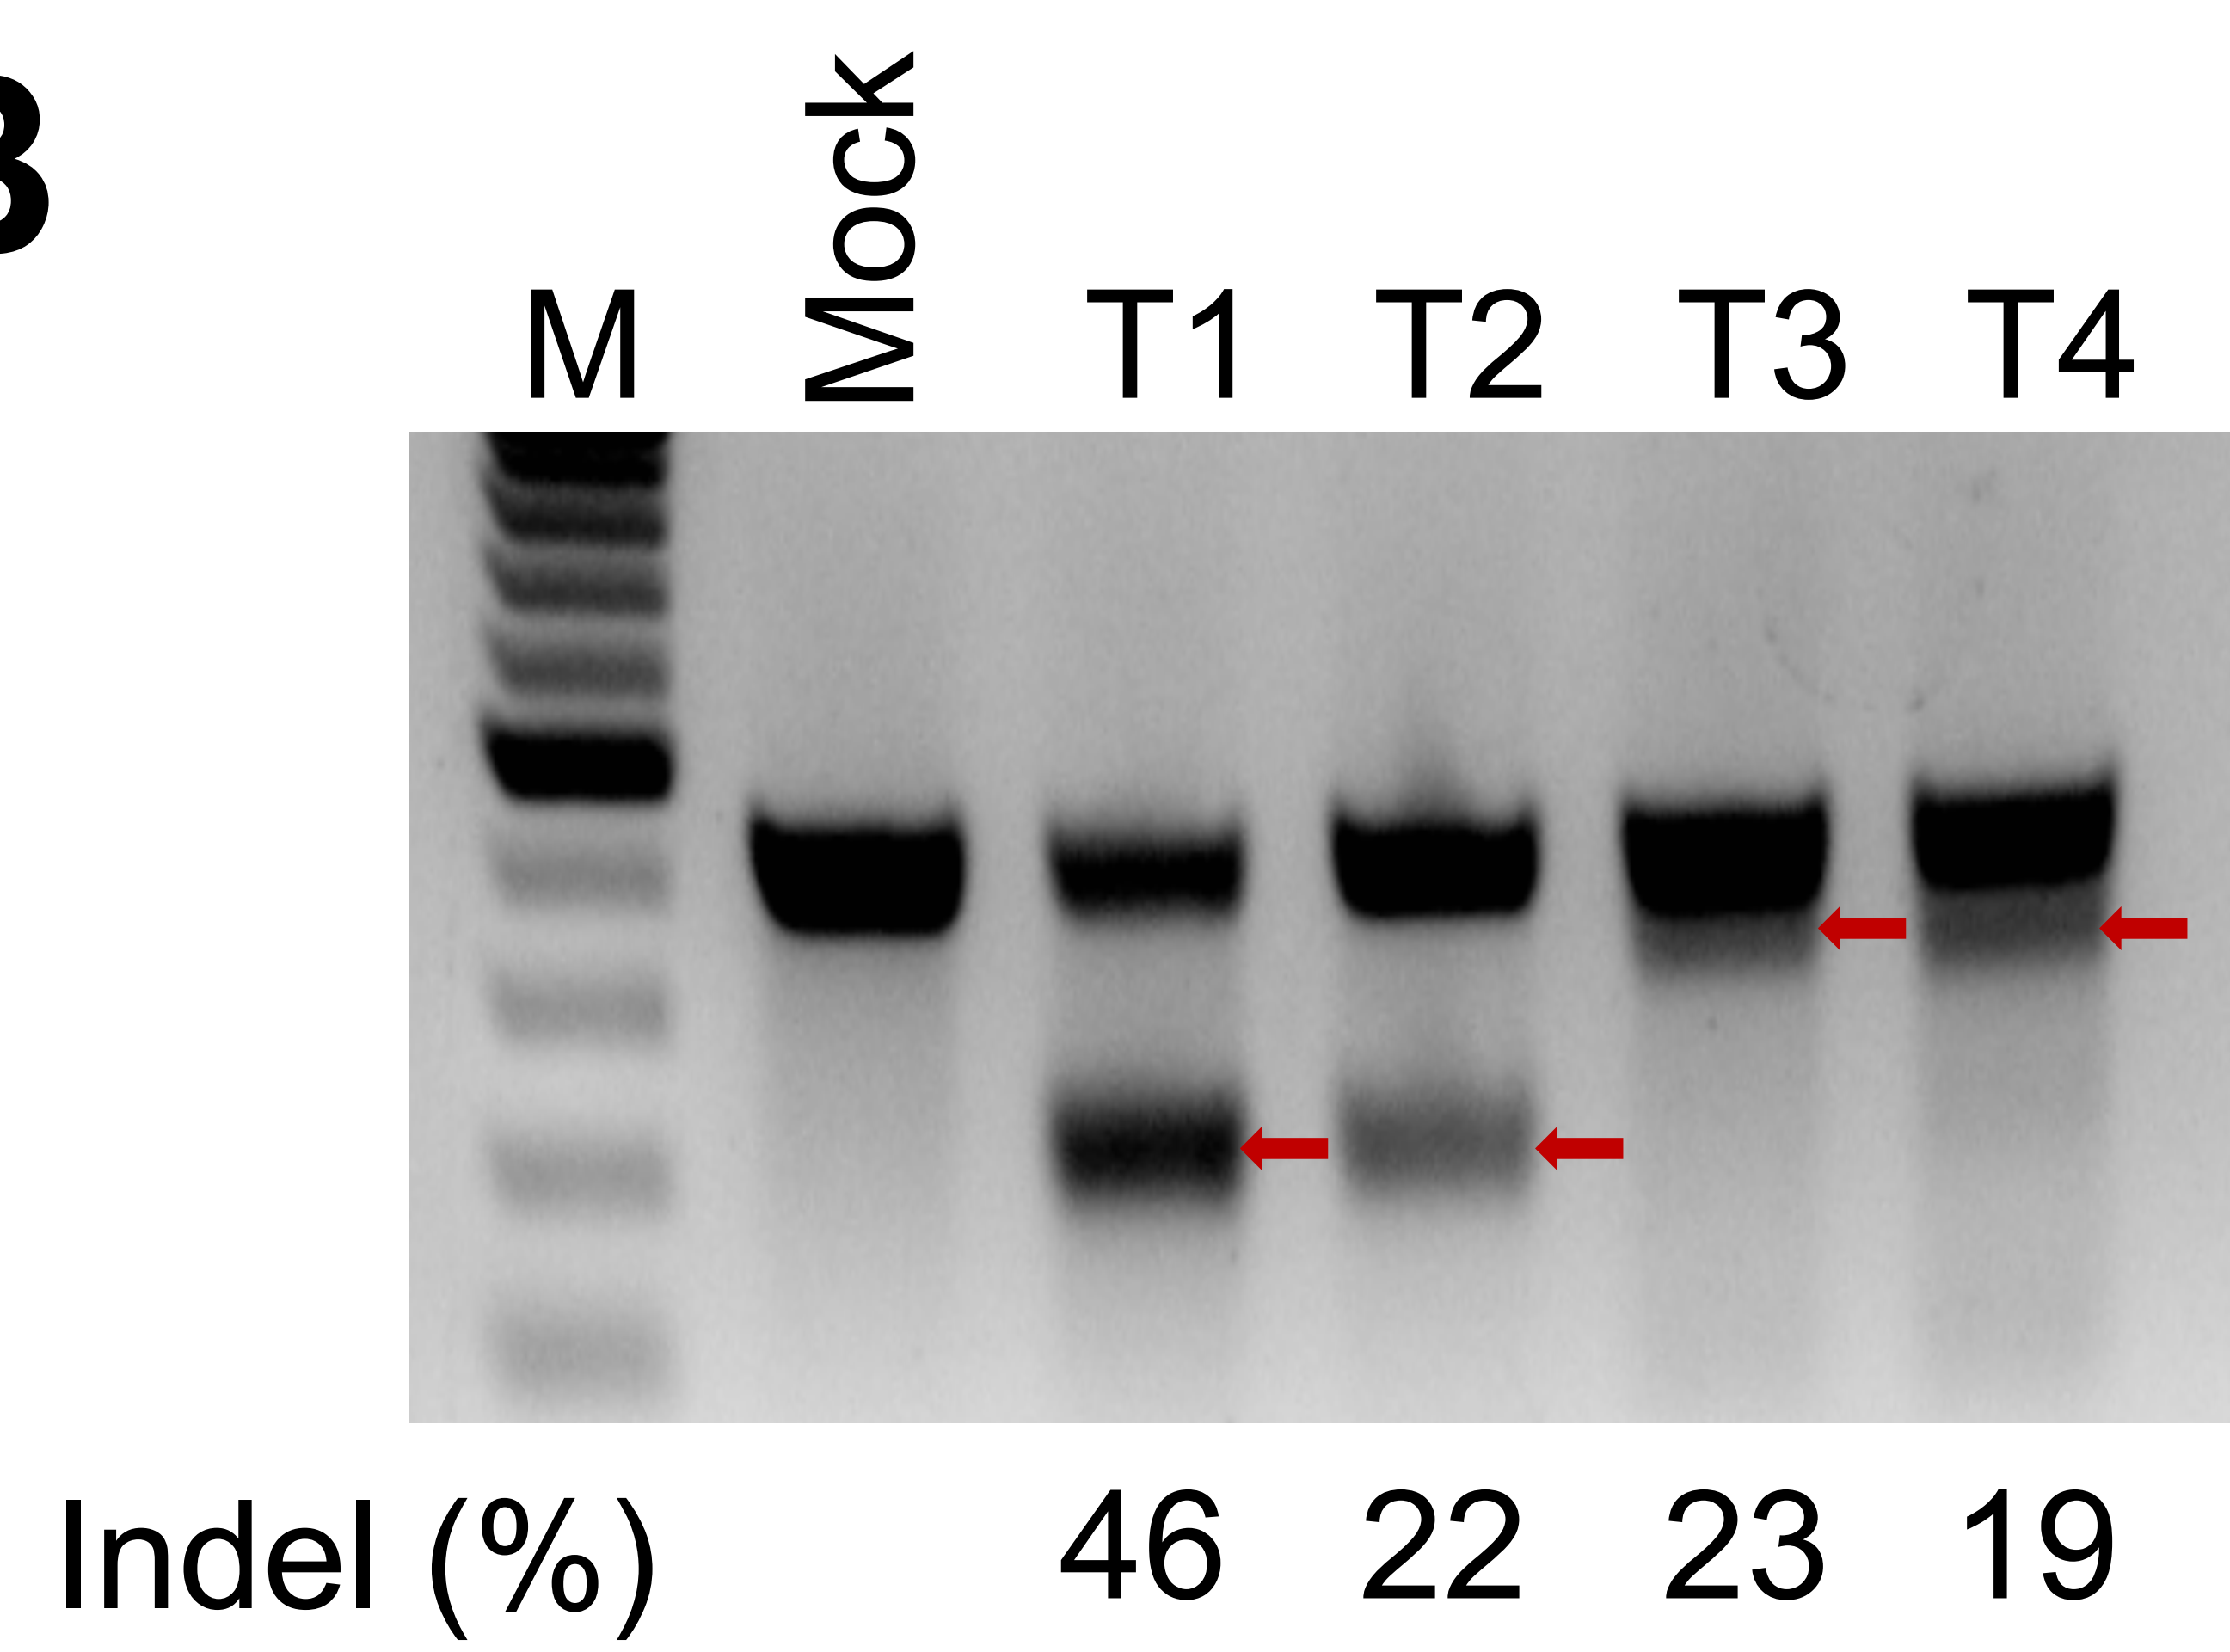

# Supplementary Fig. S2

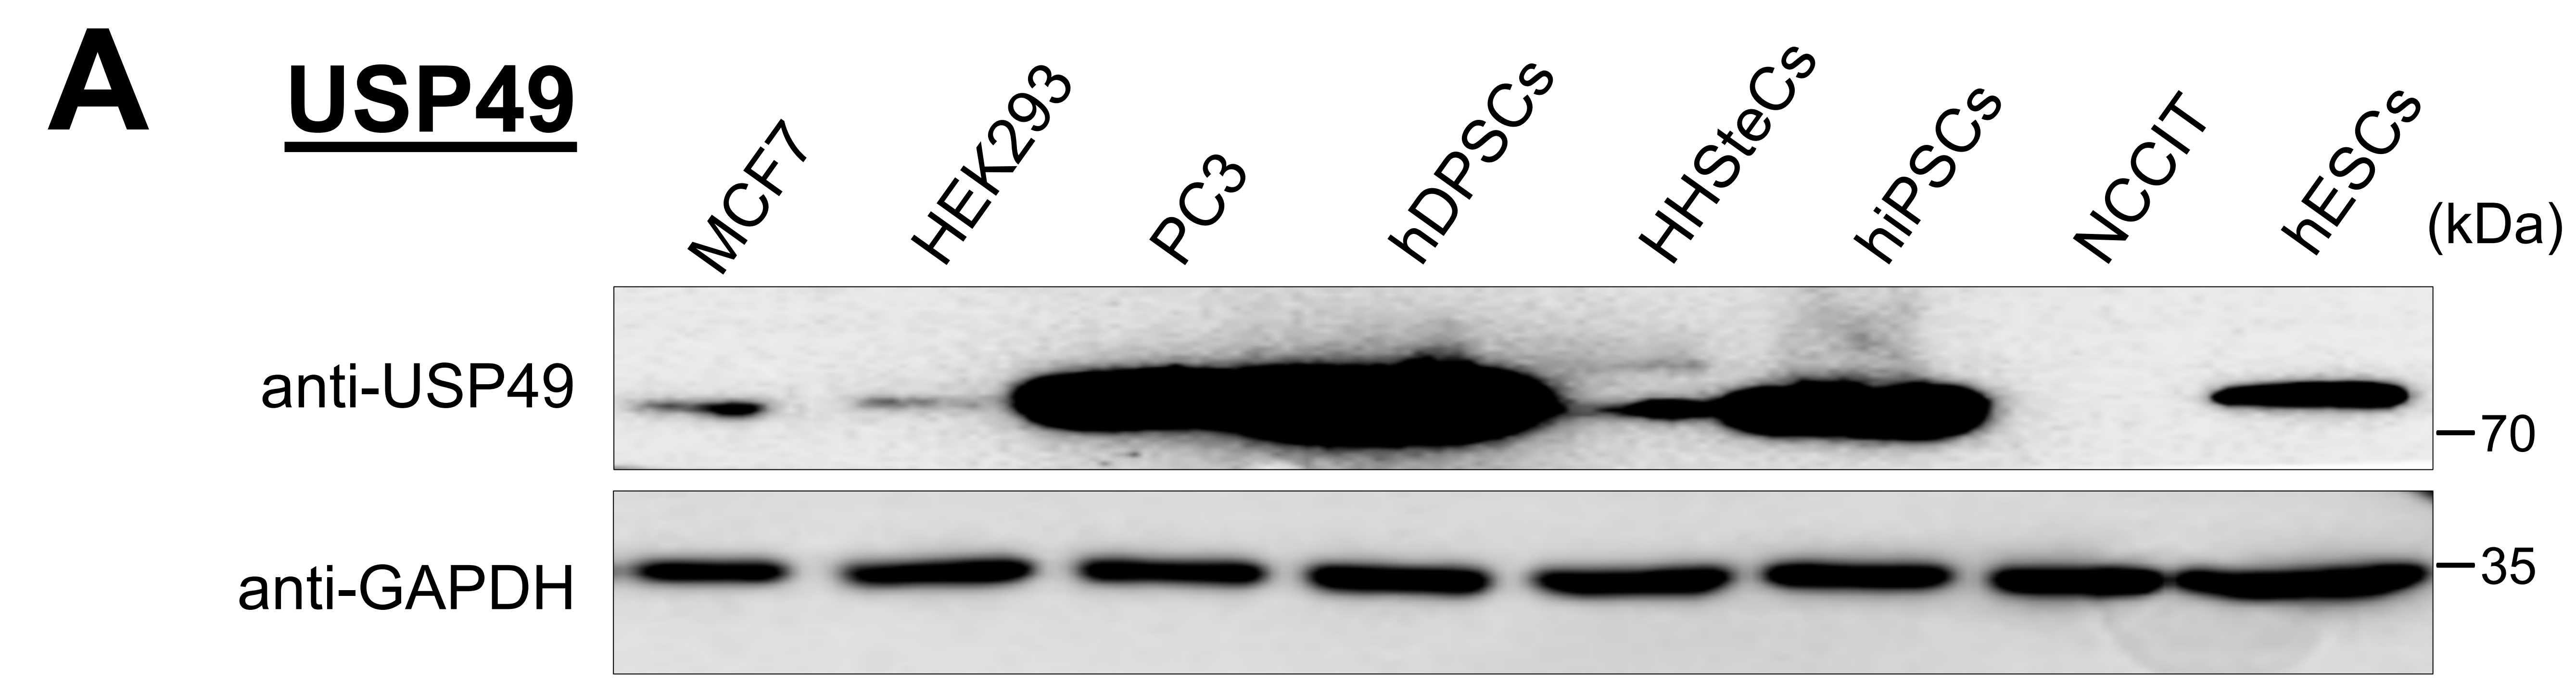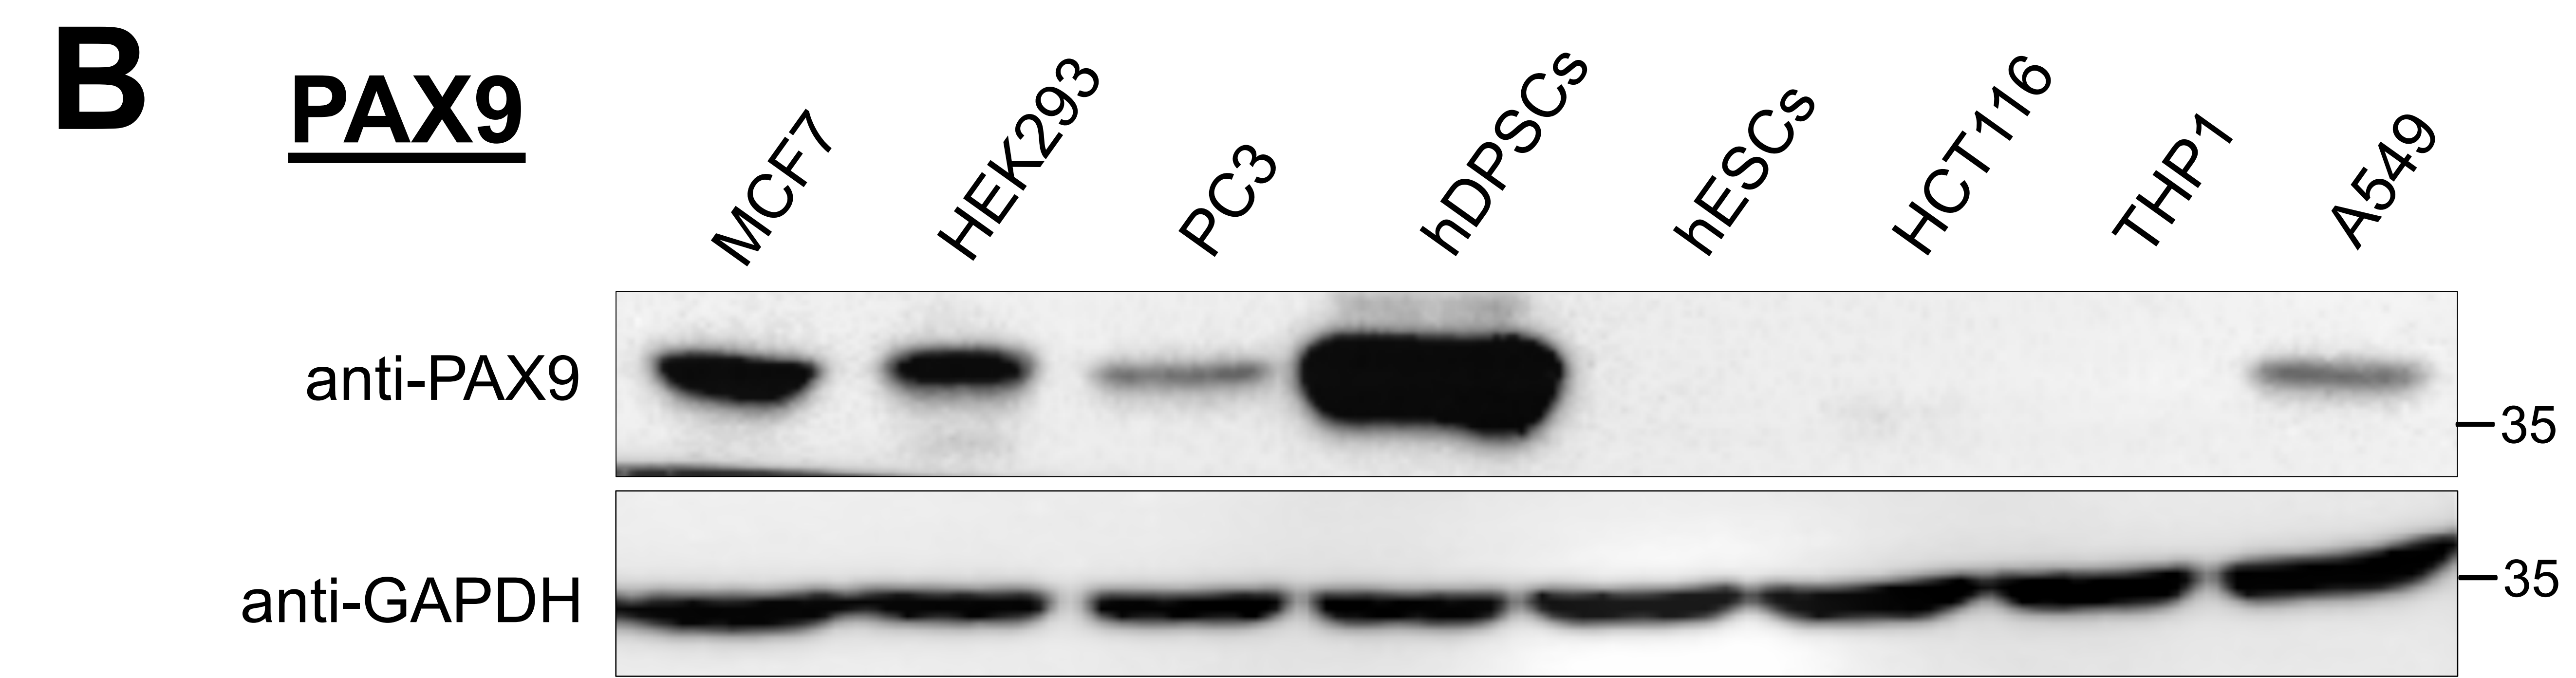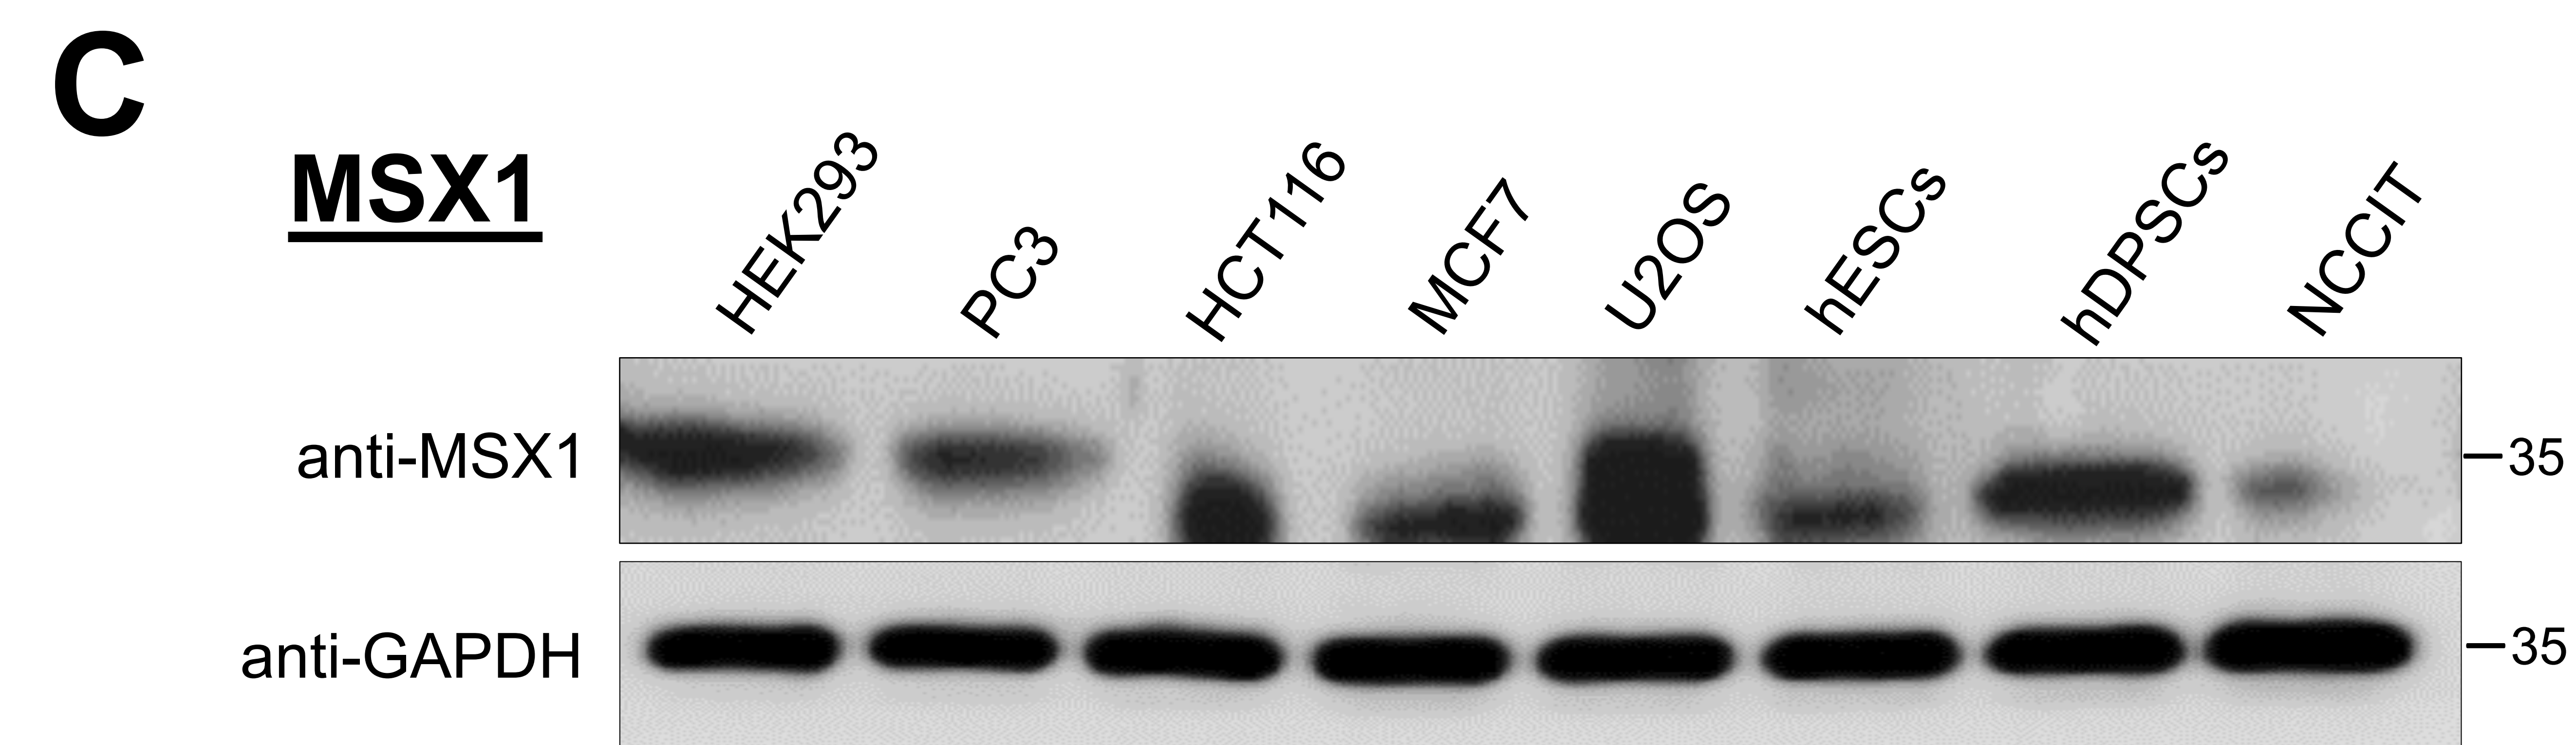

# Supplementary Fig.S3

## A

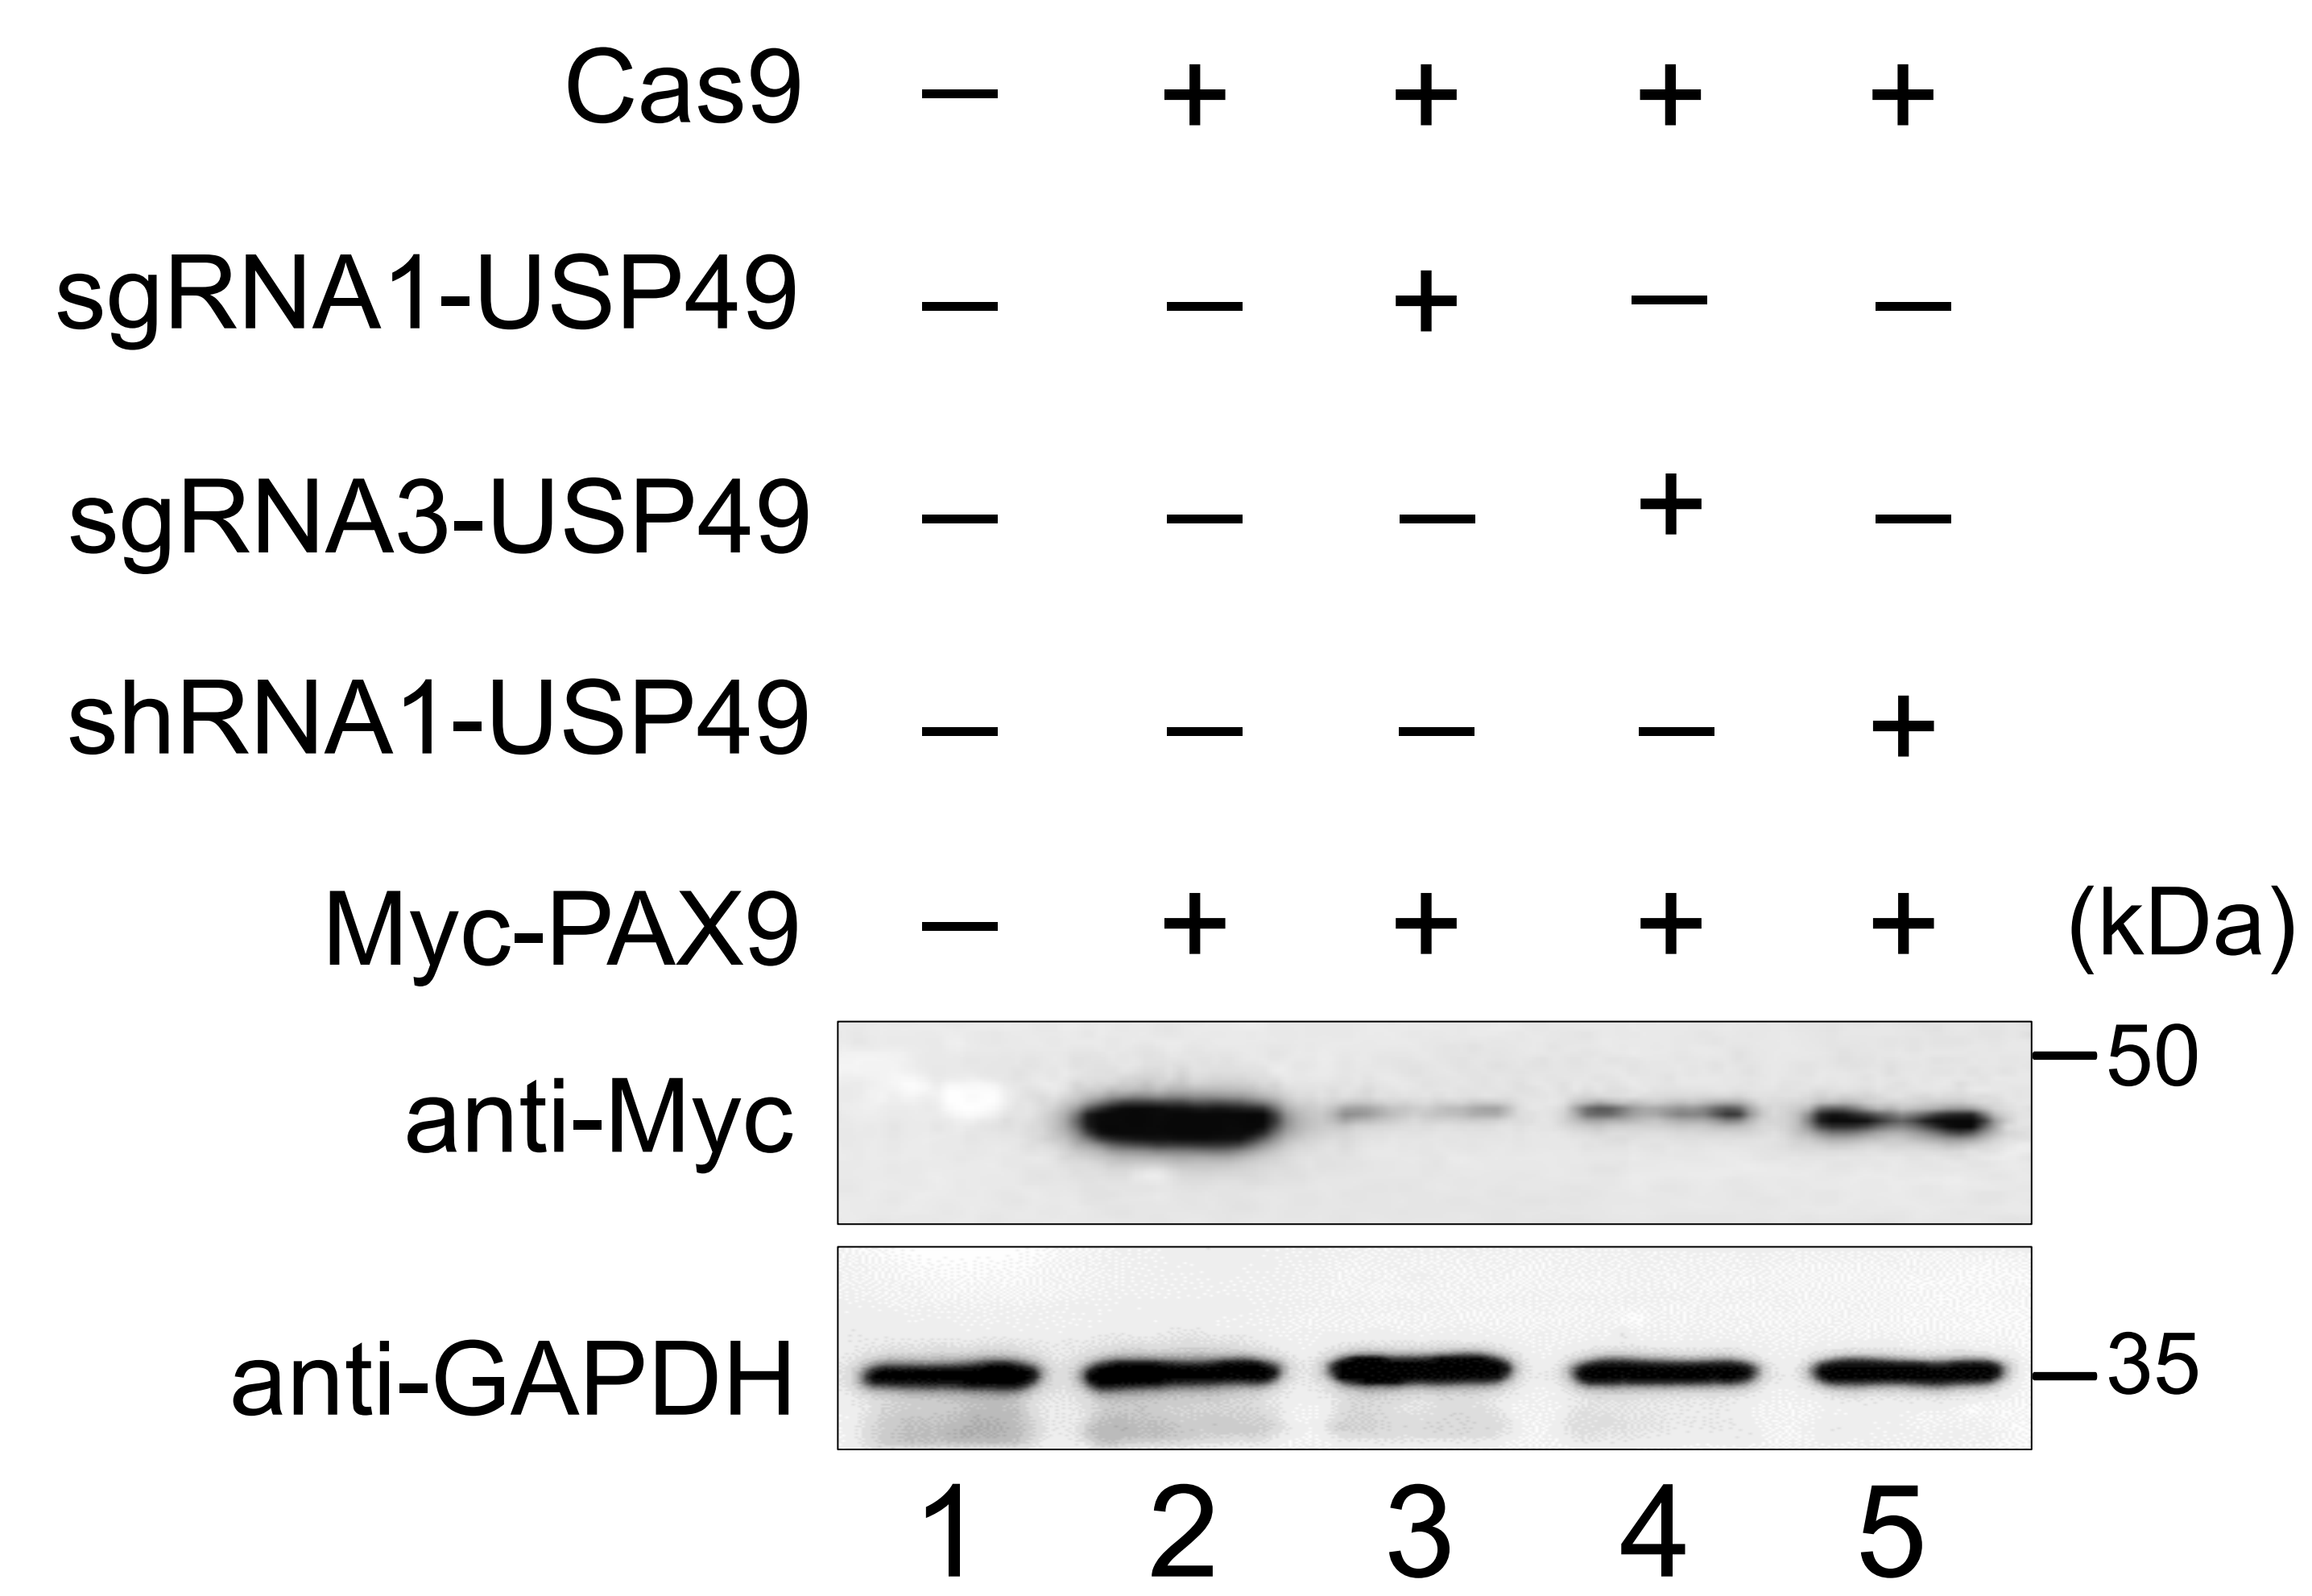

## B

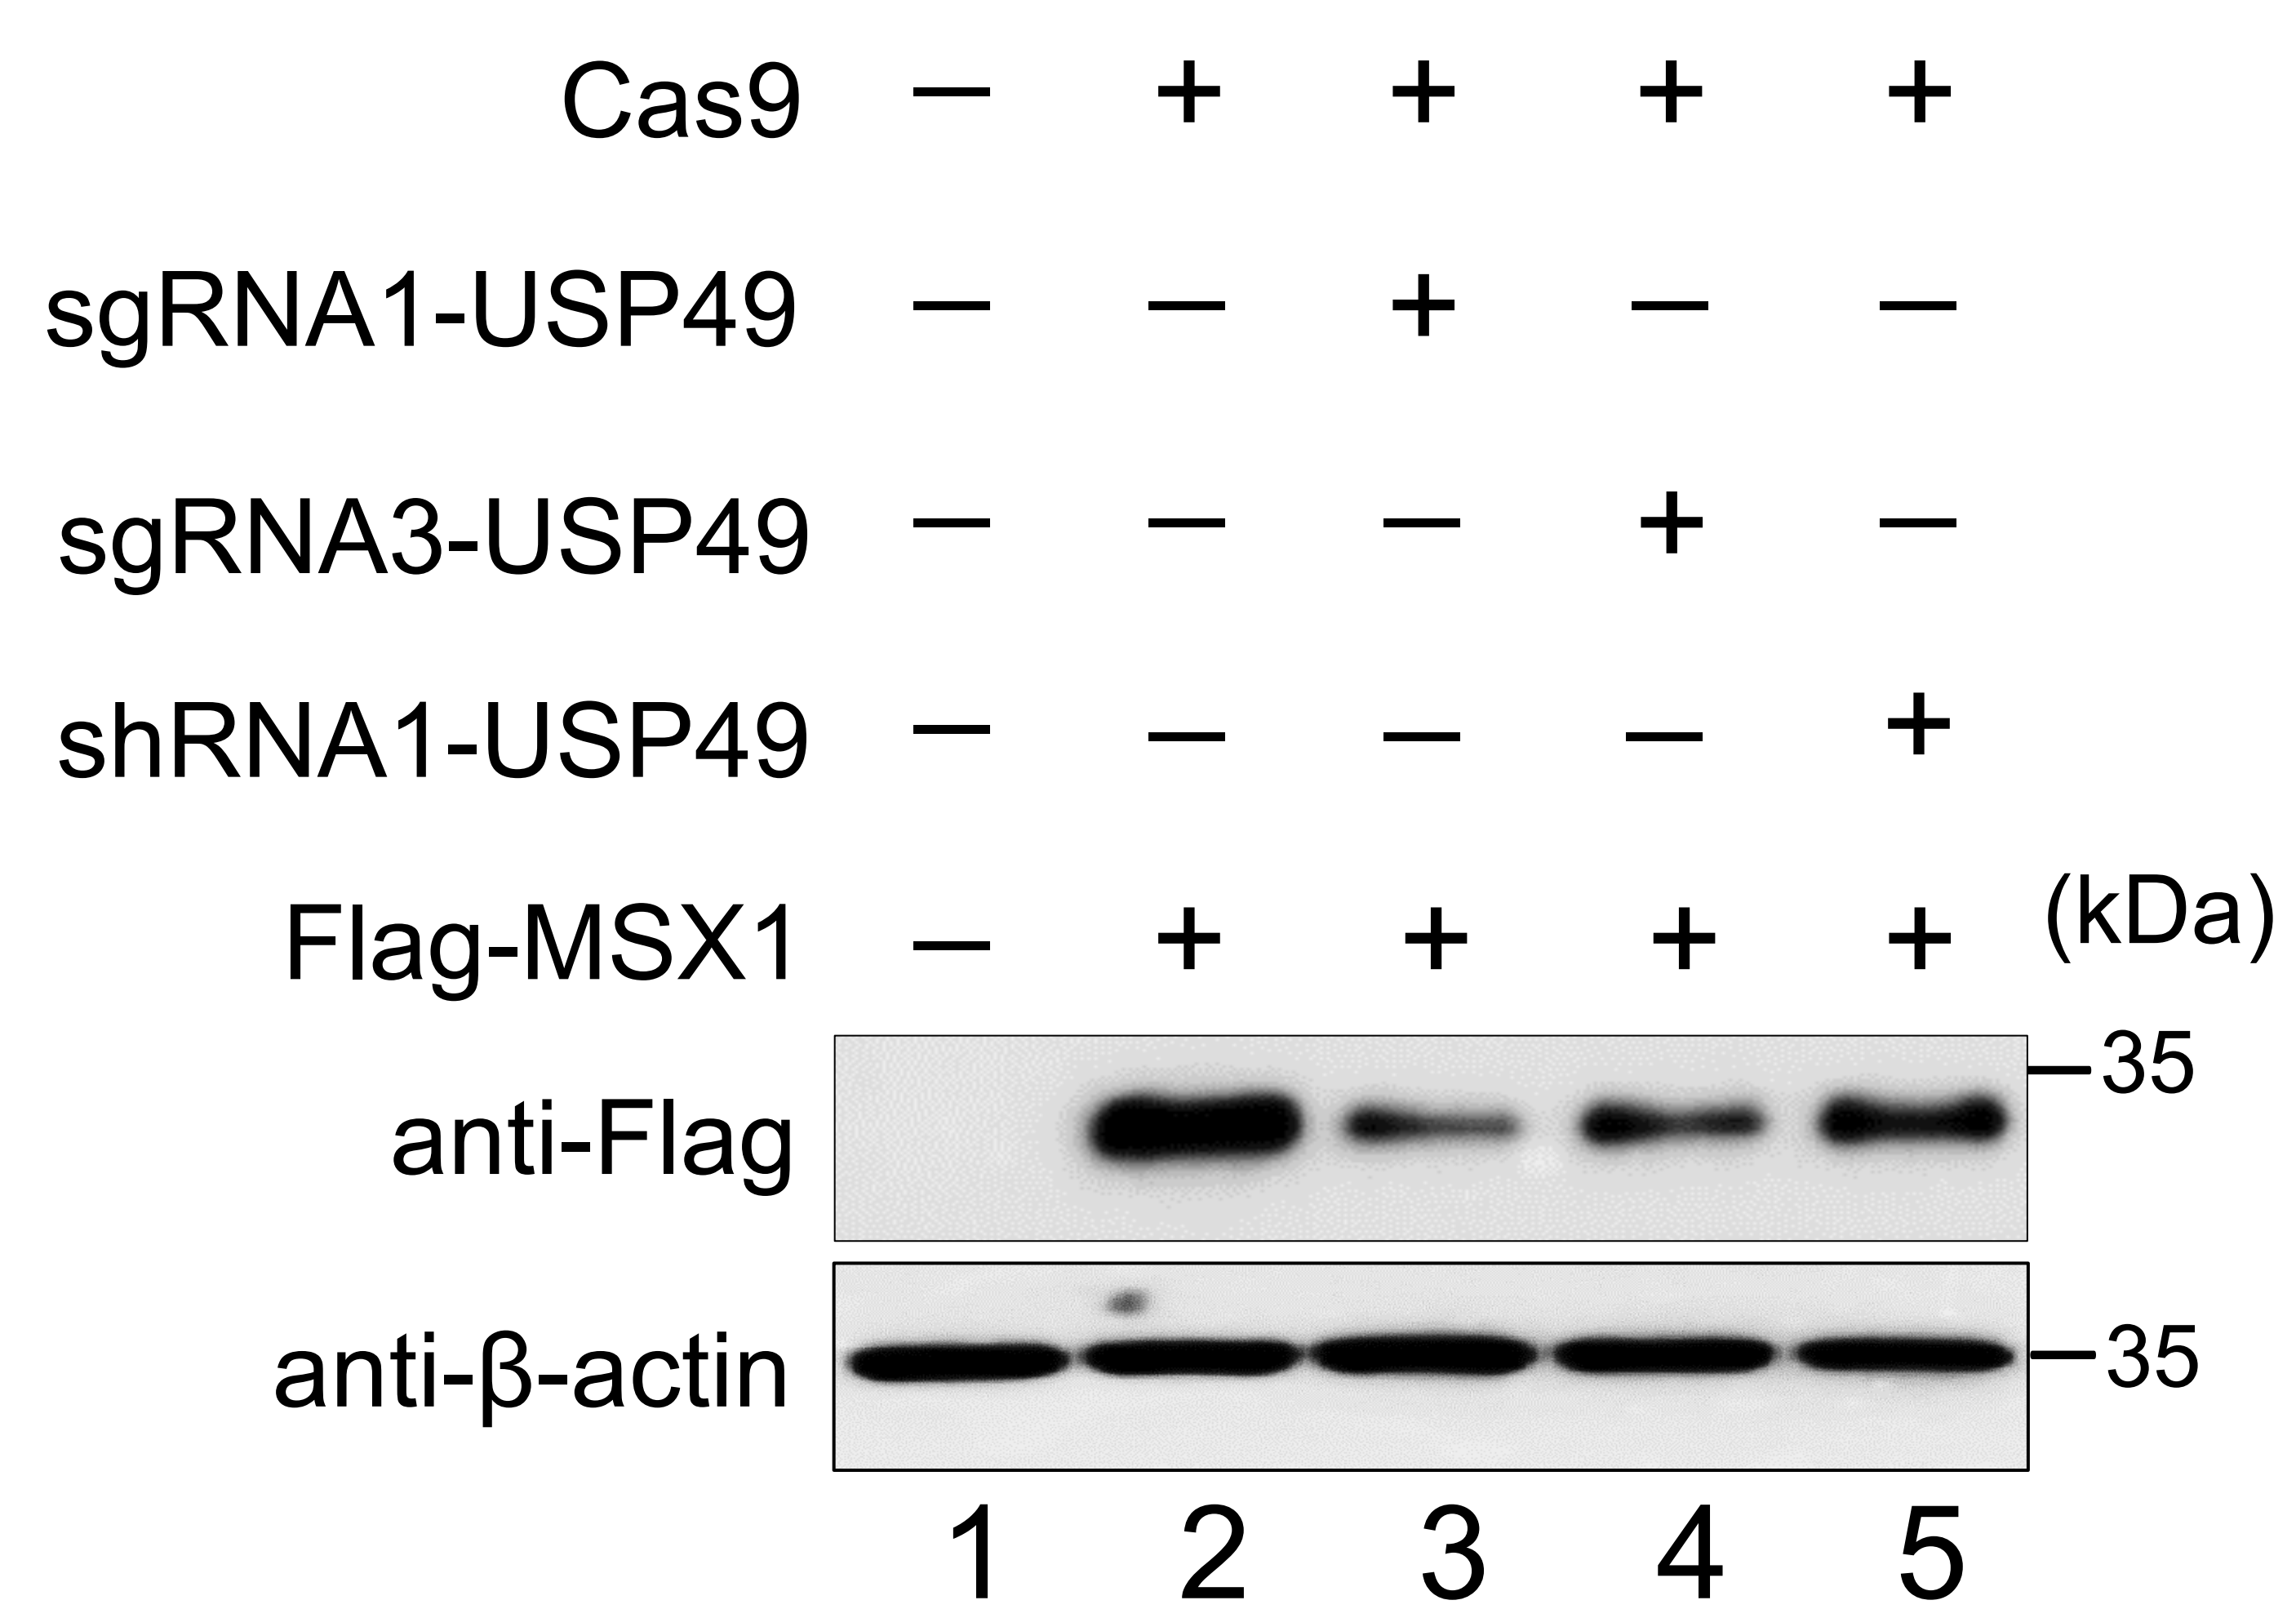

## C

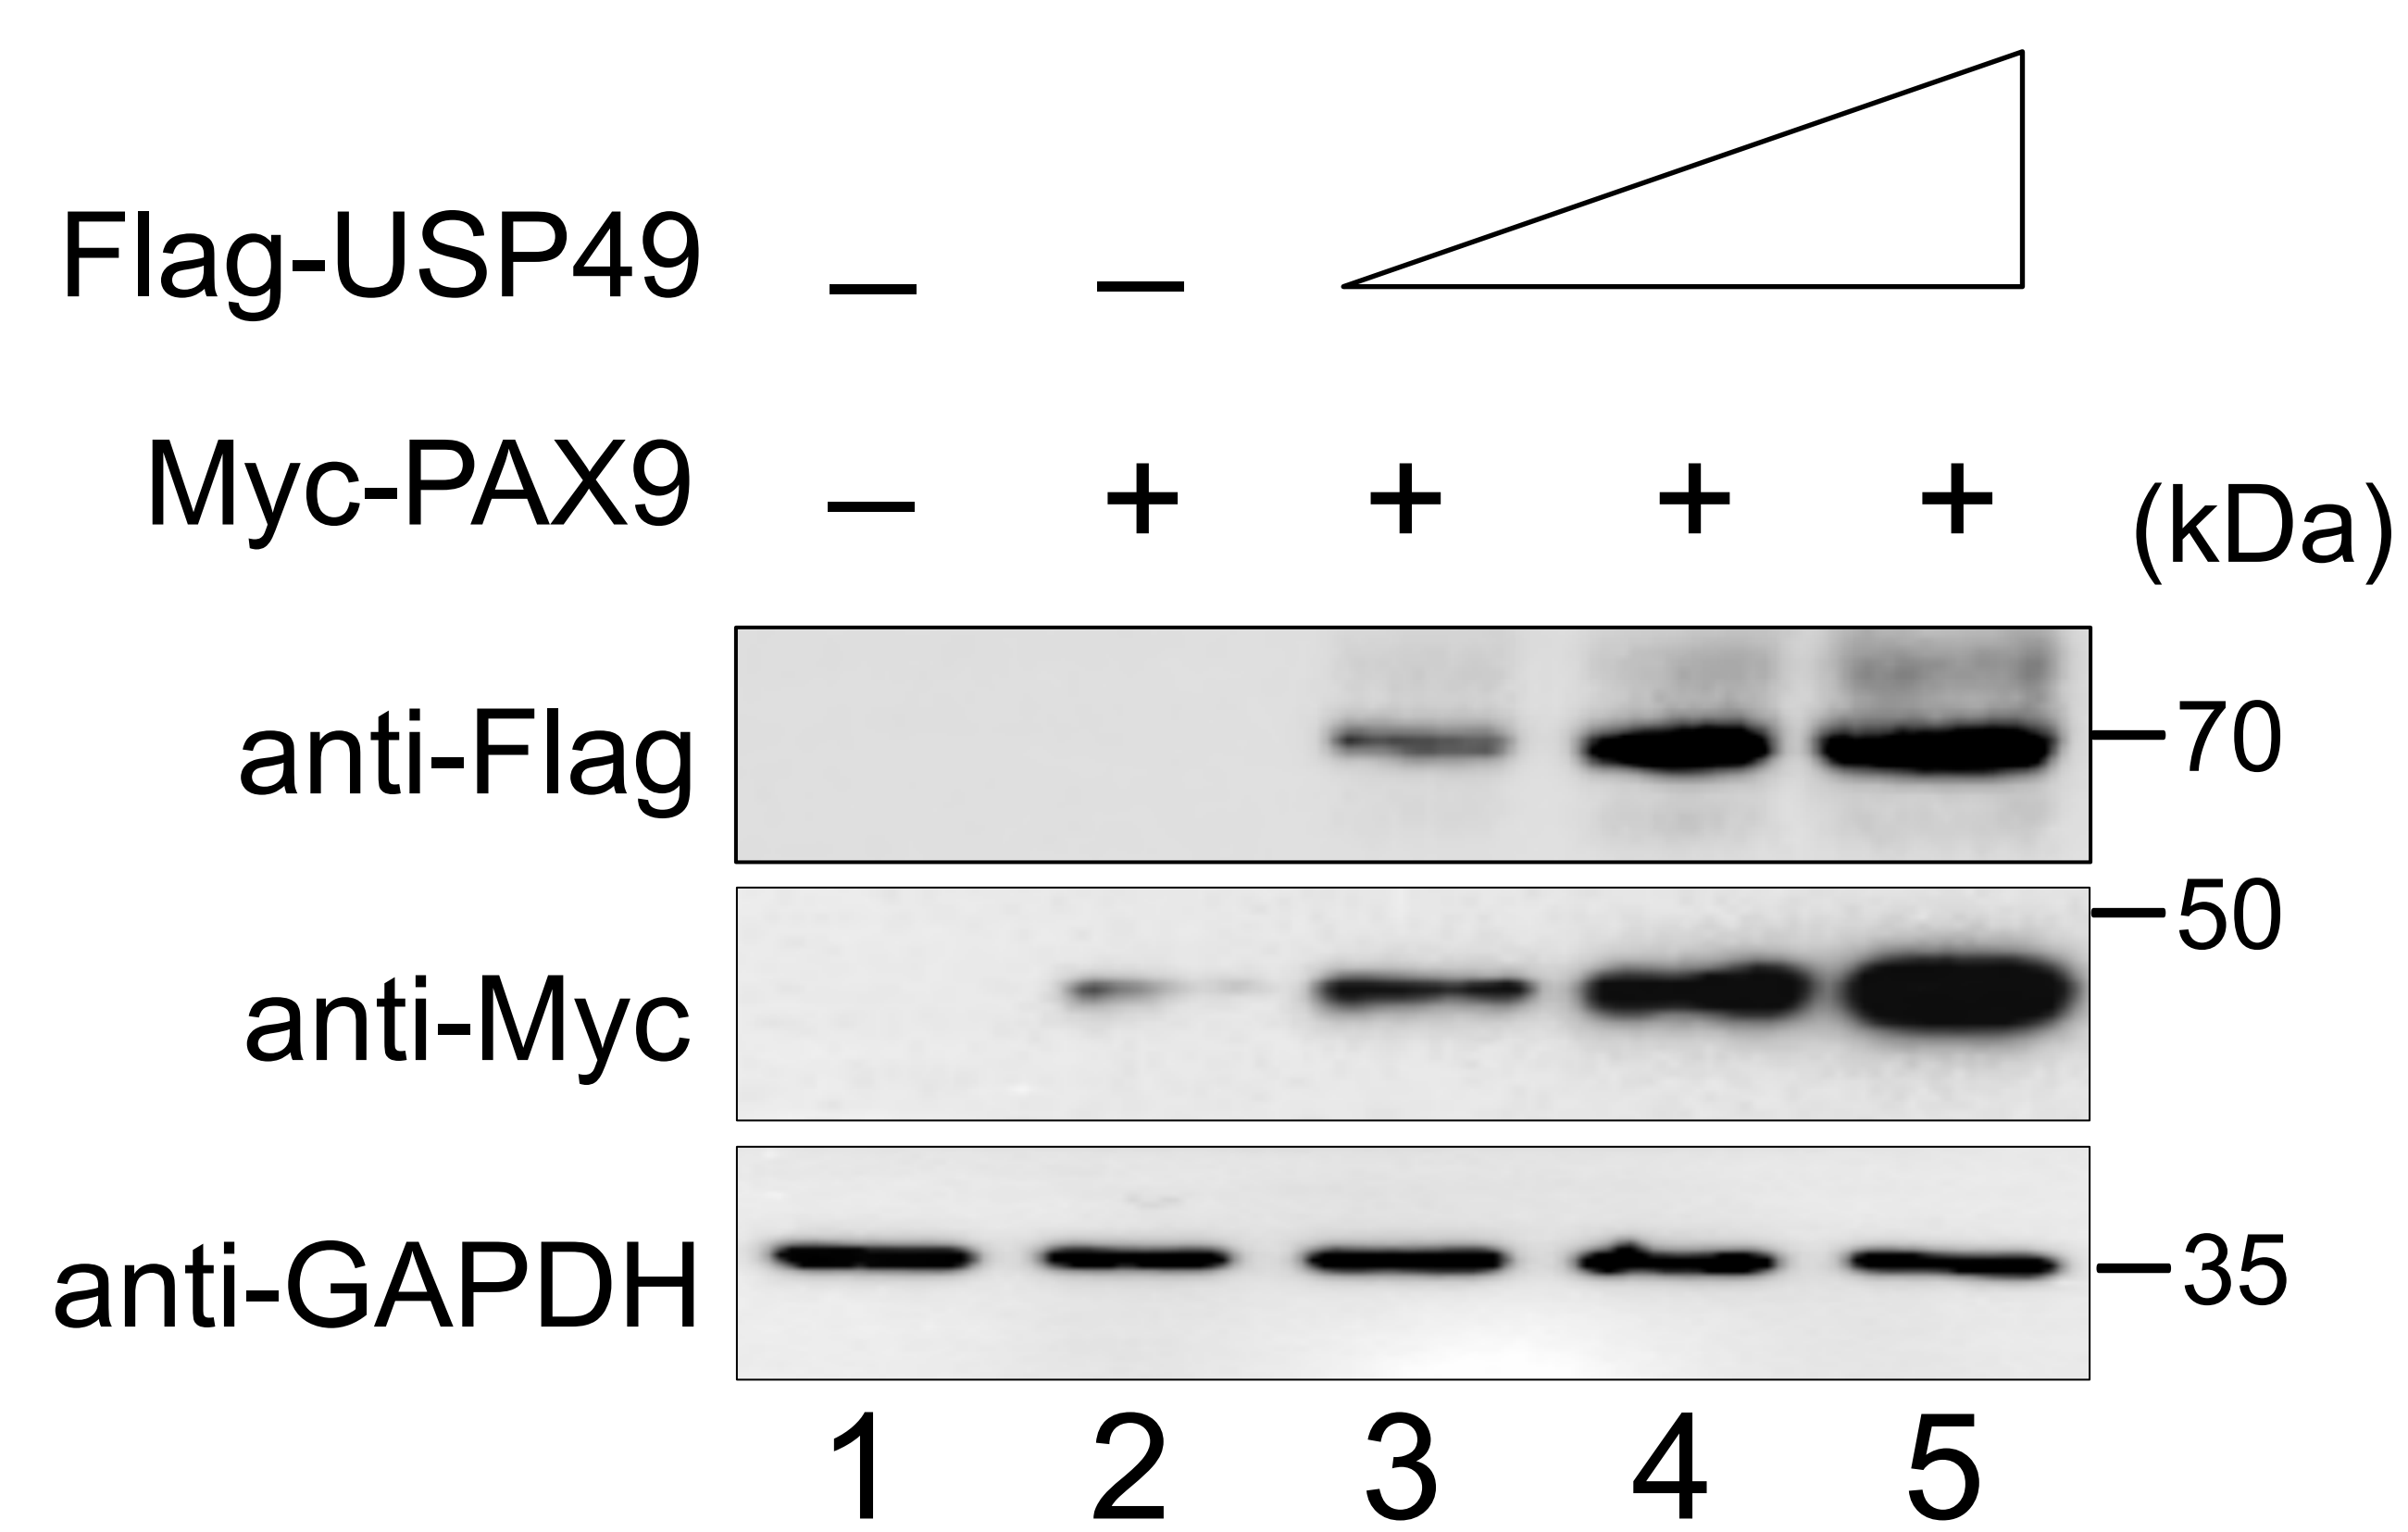

## D

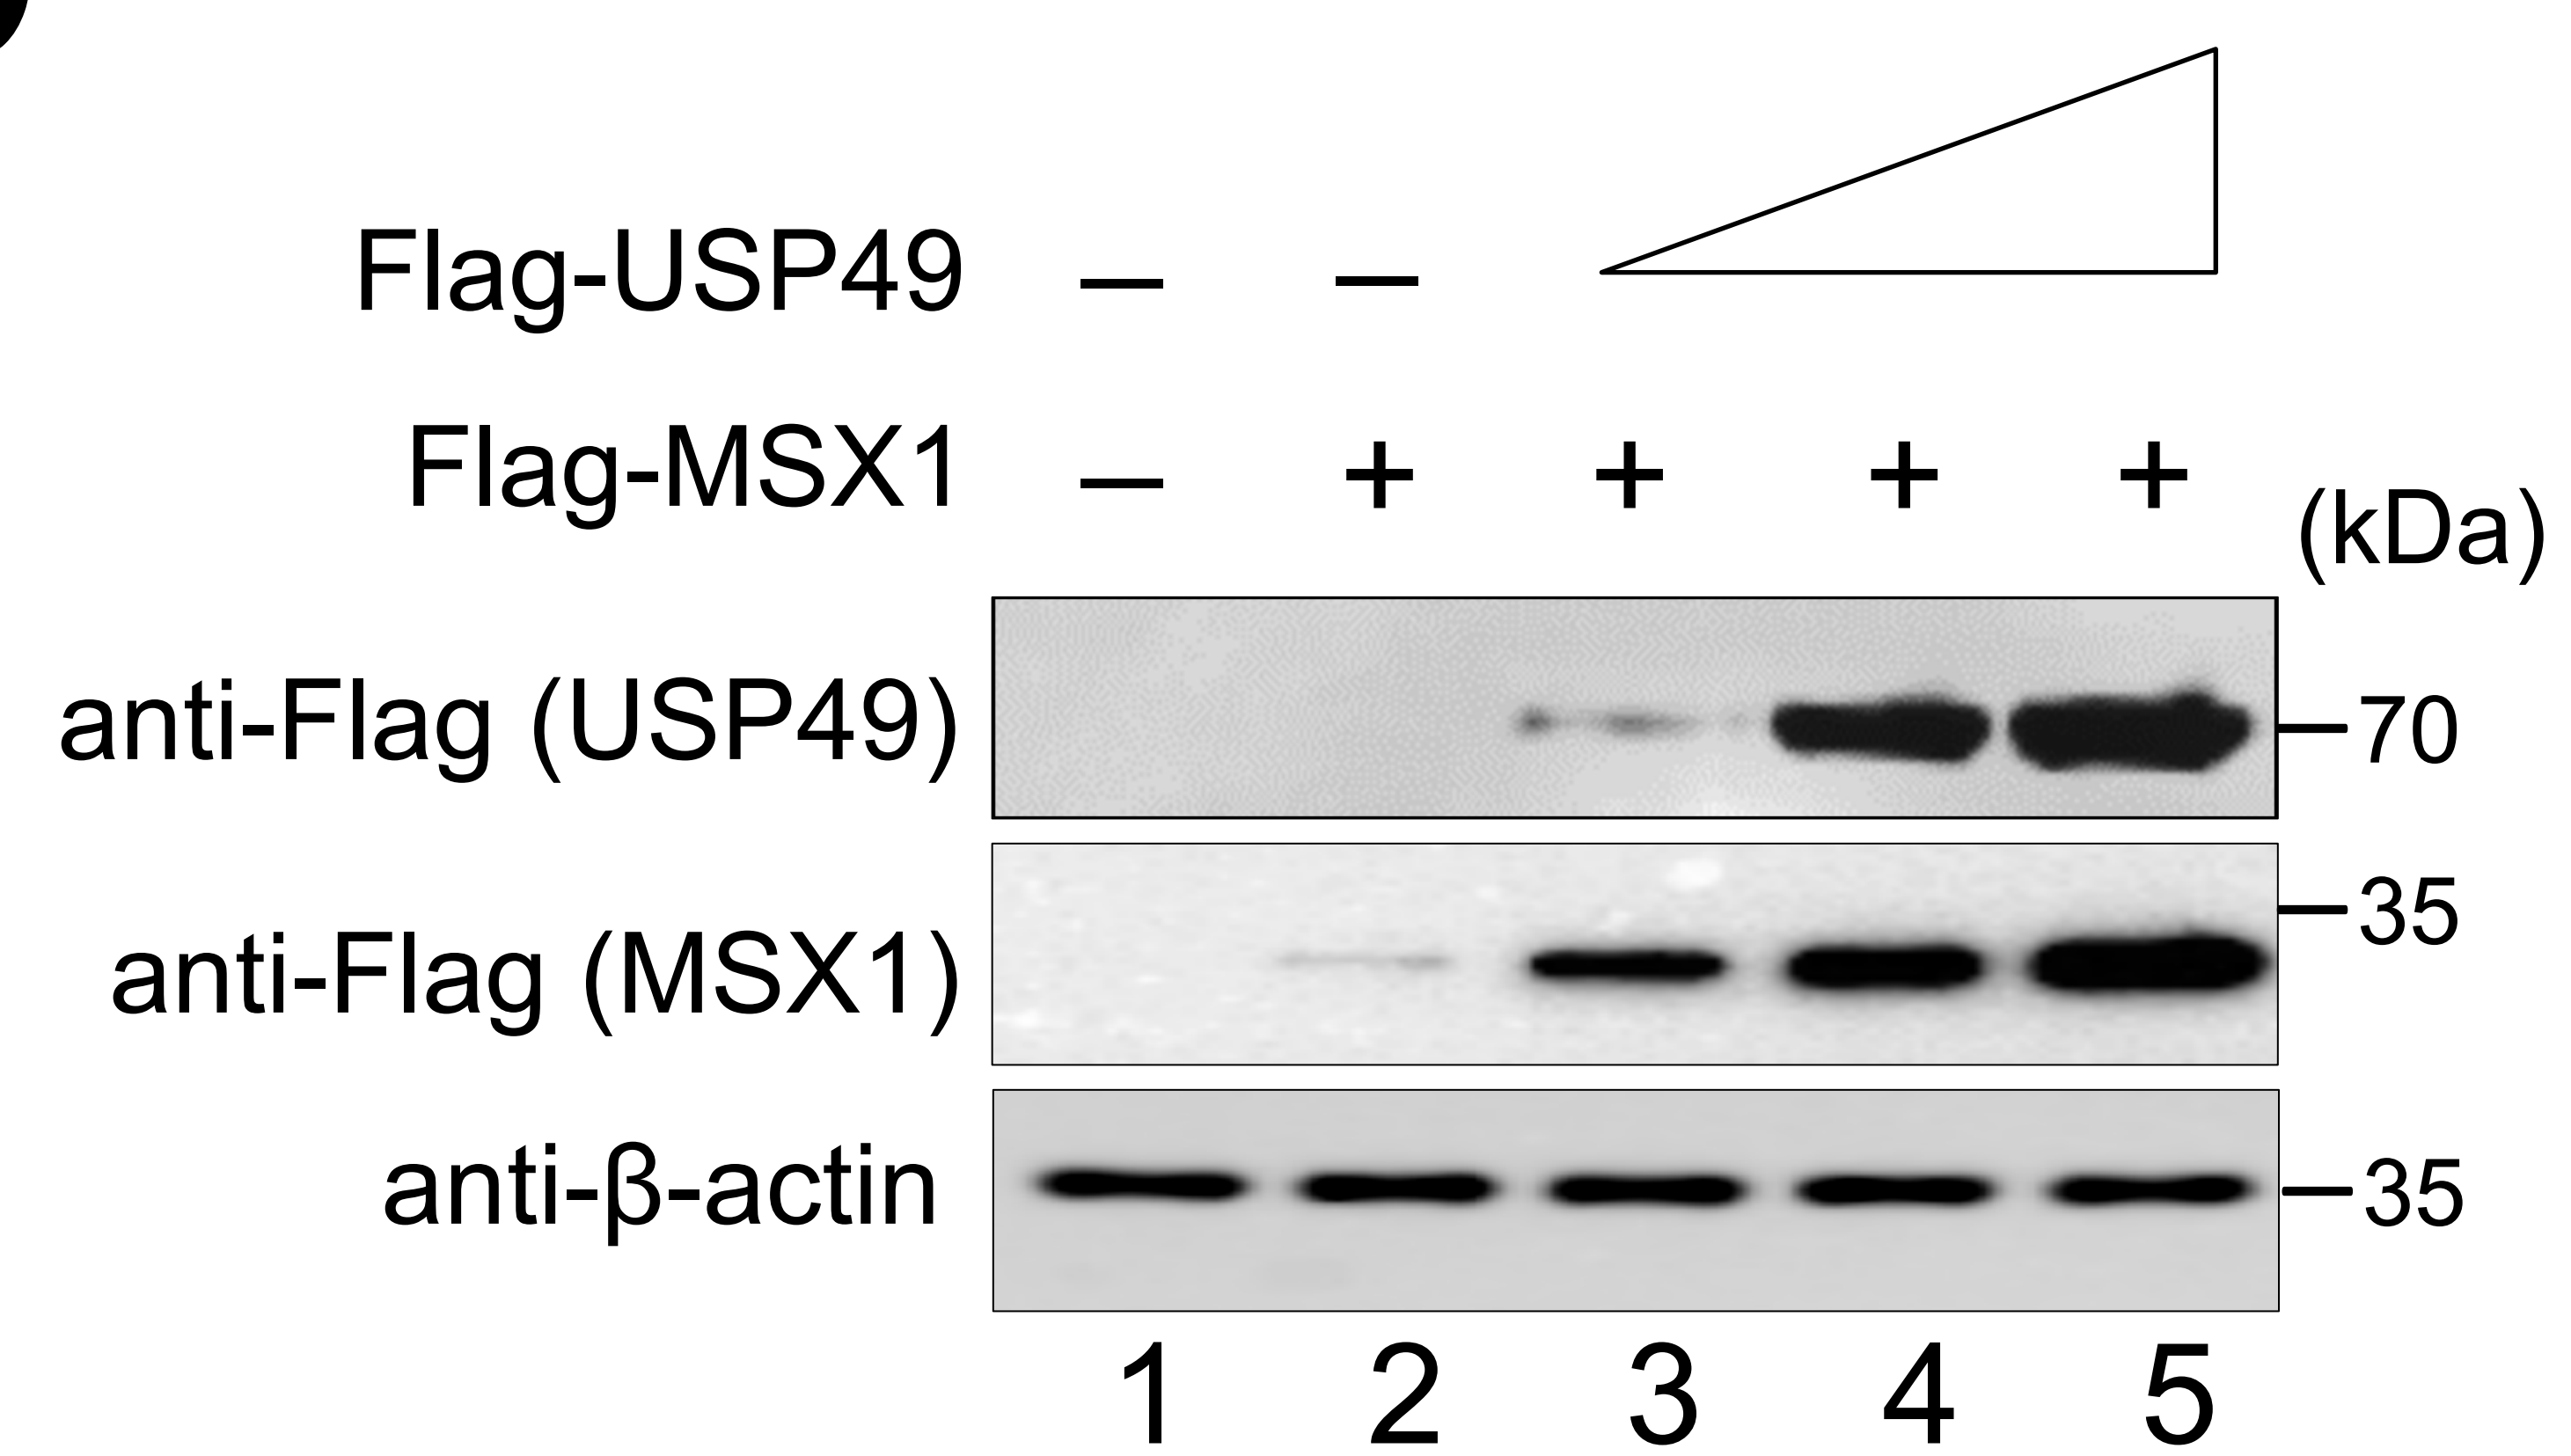

## E

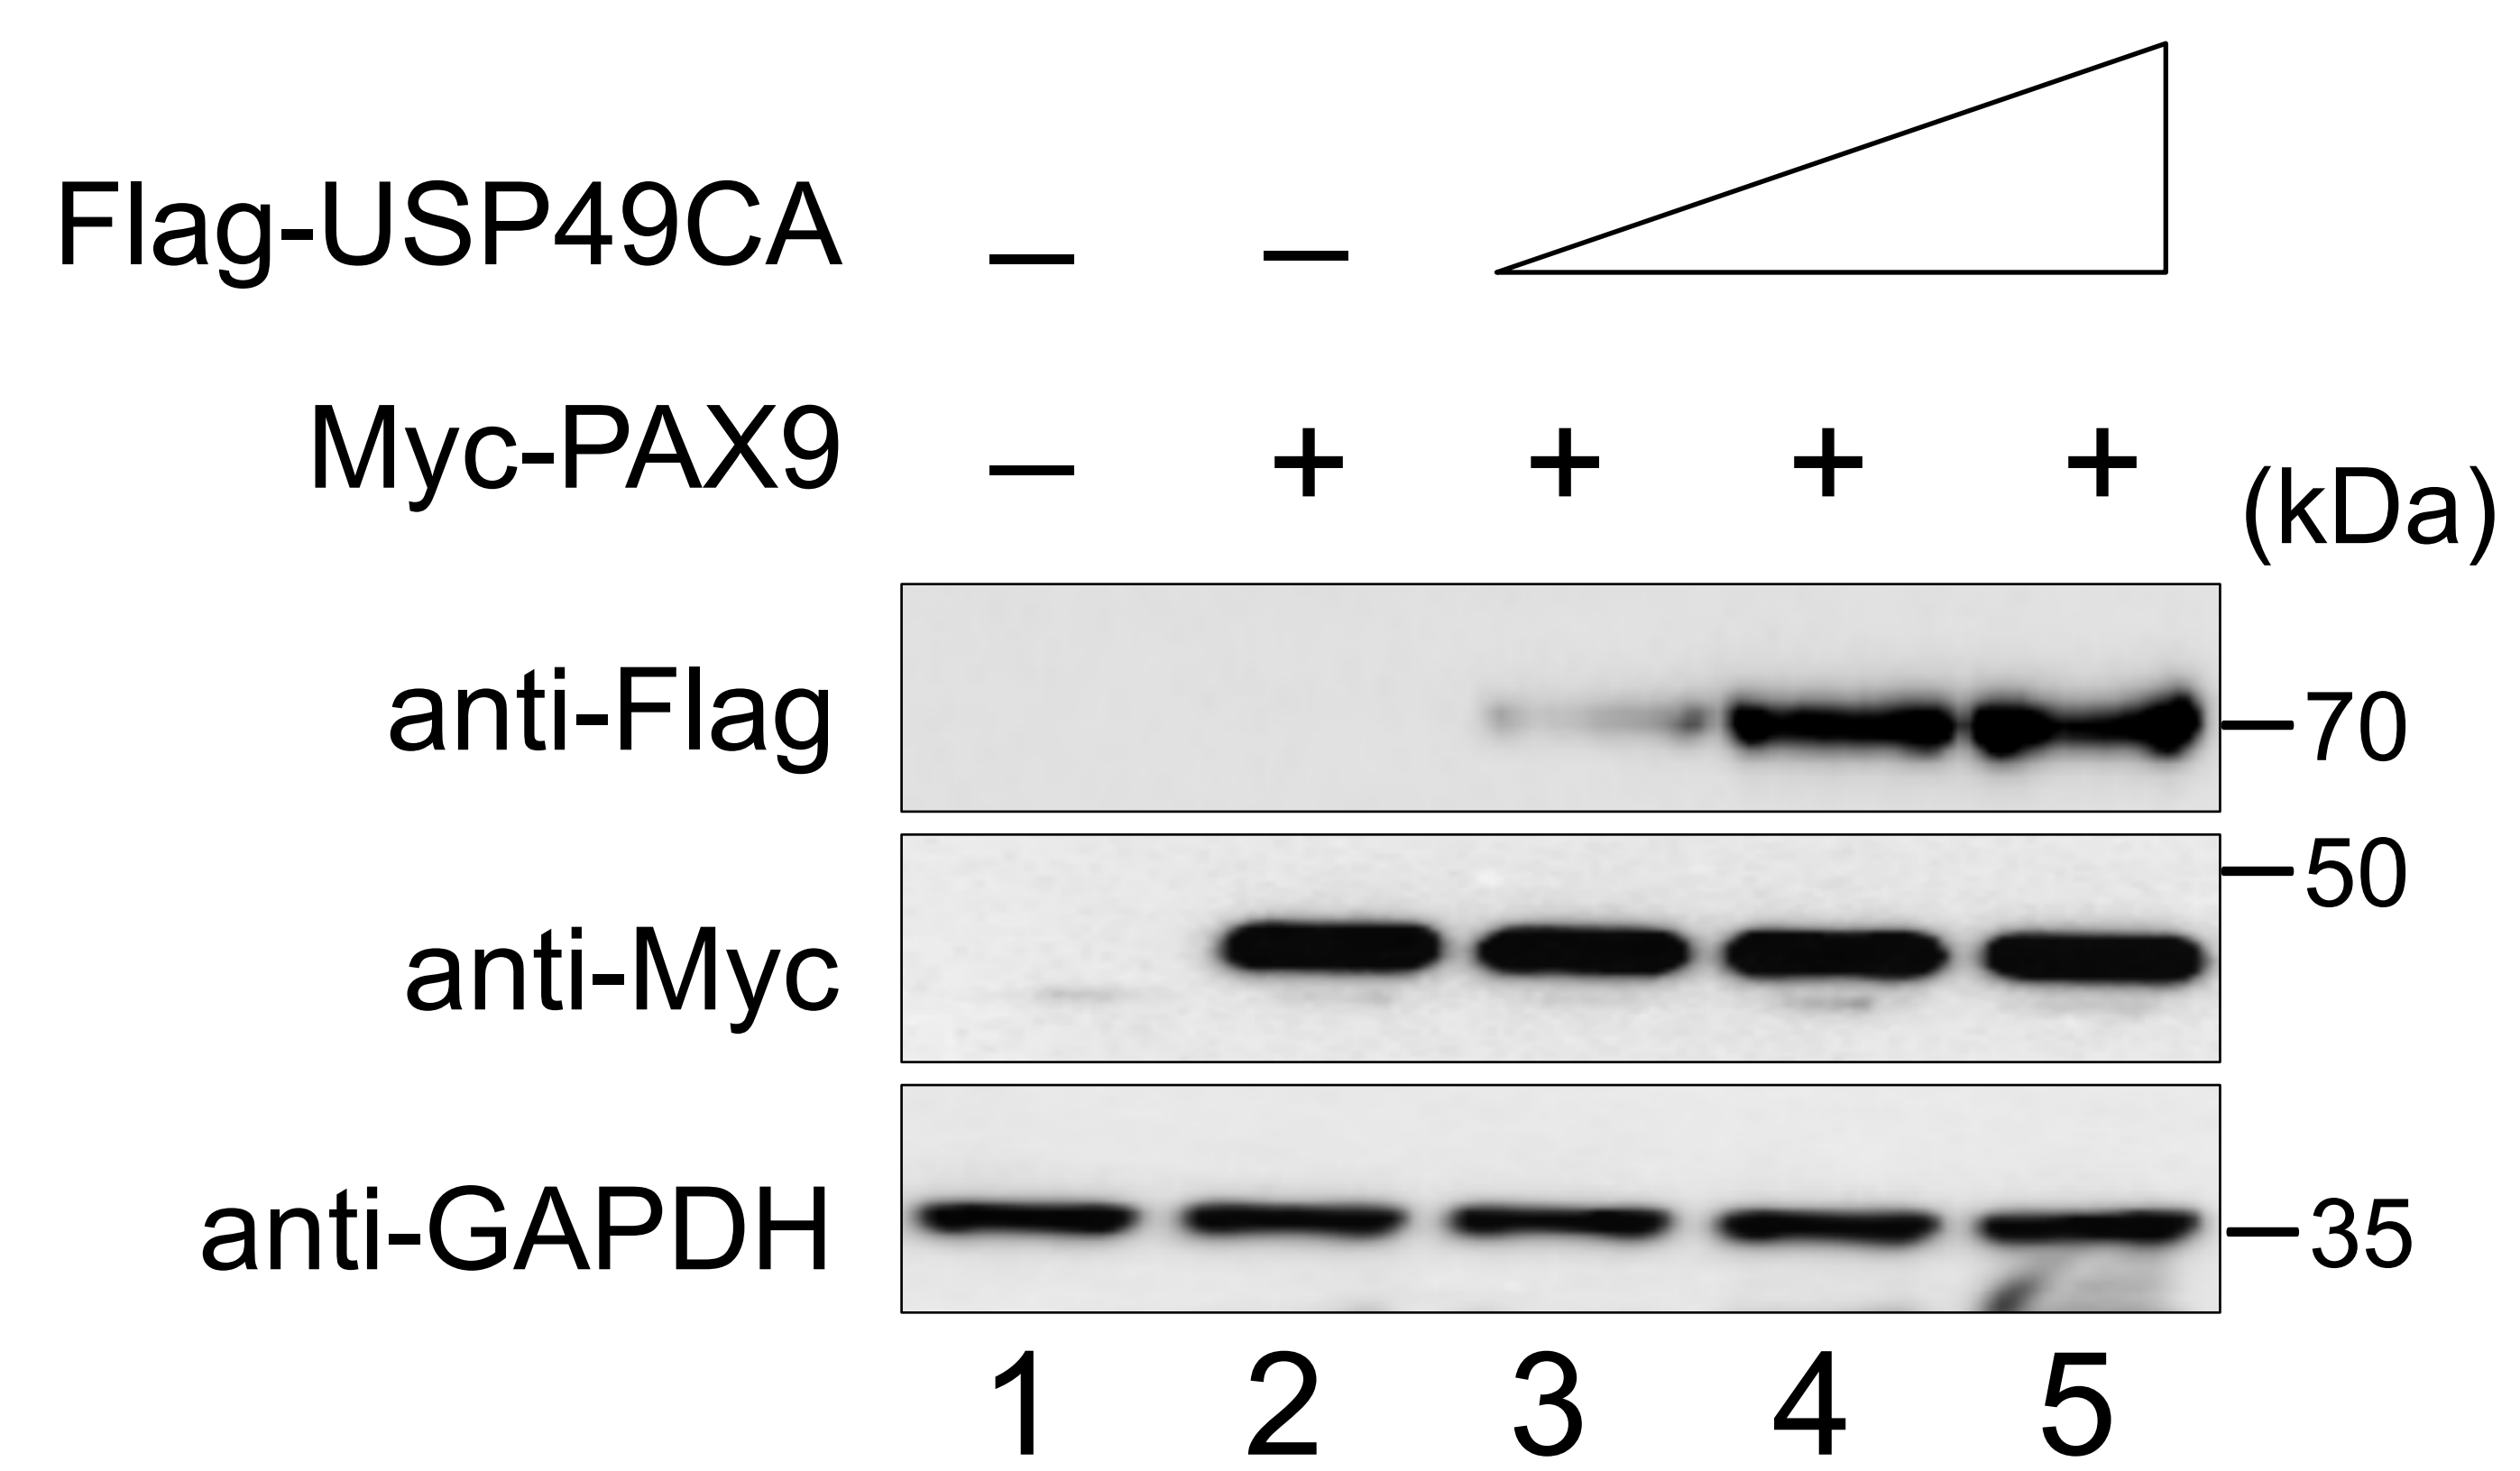

## F

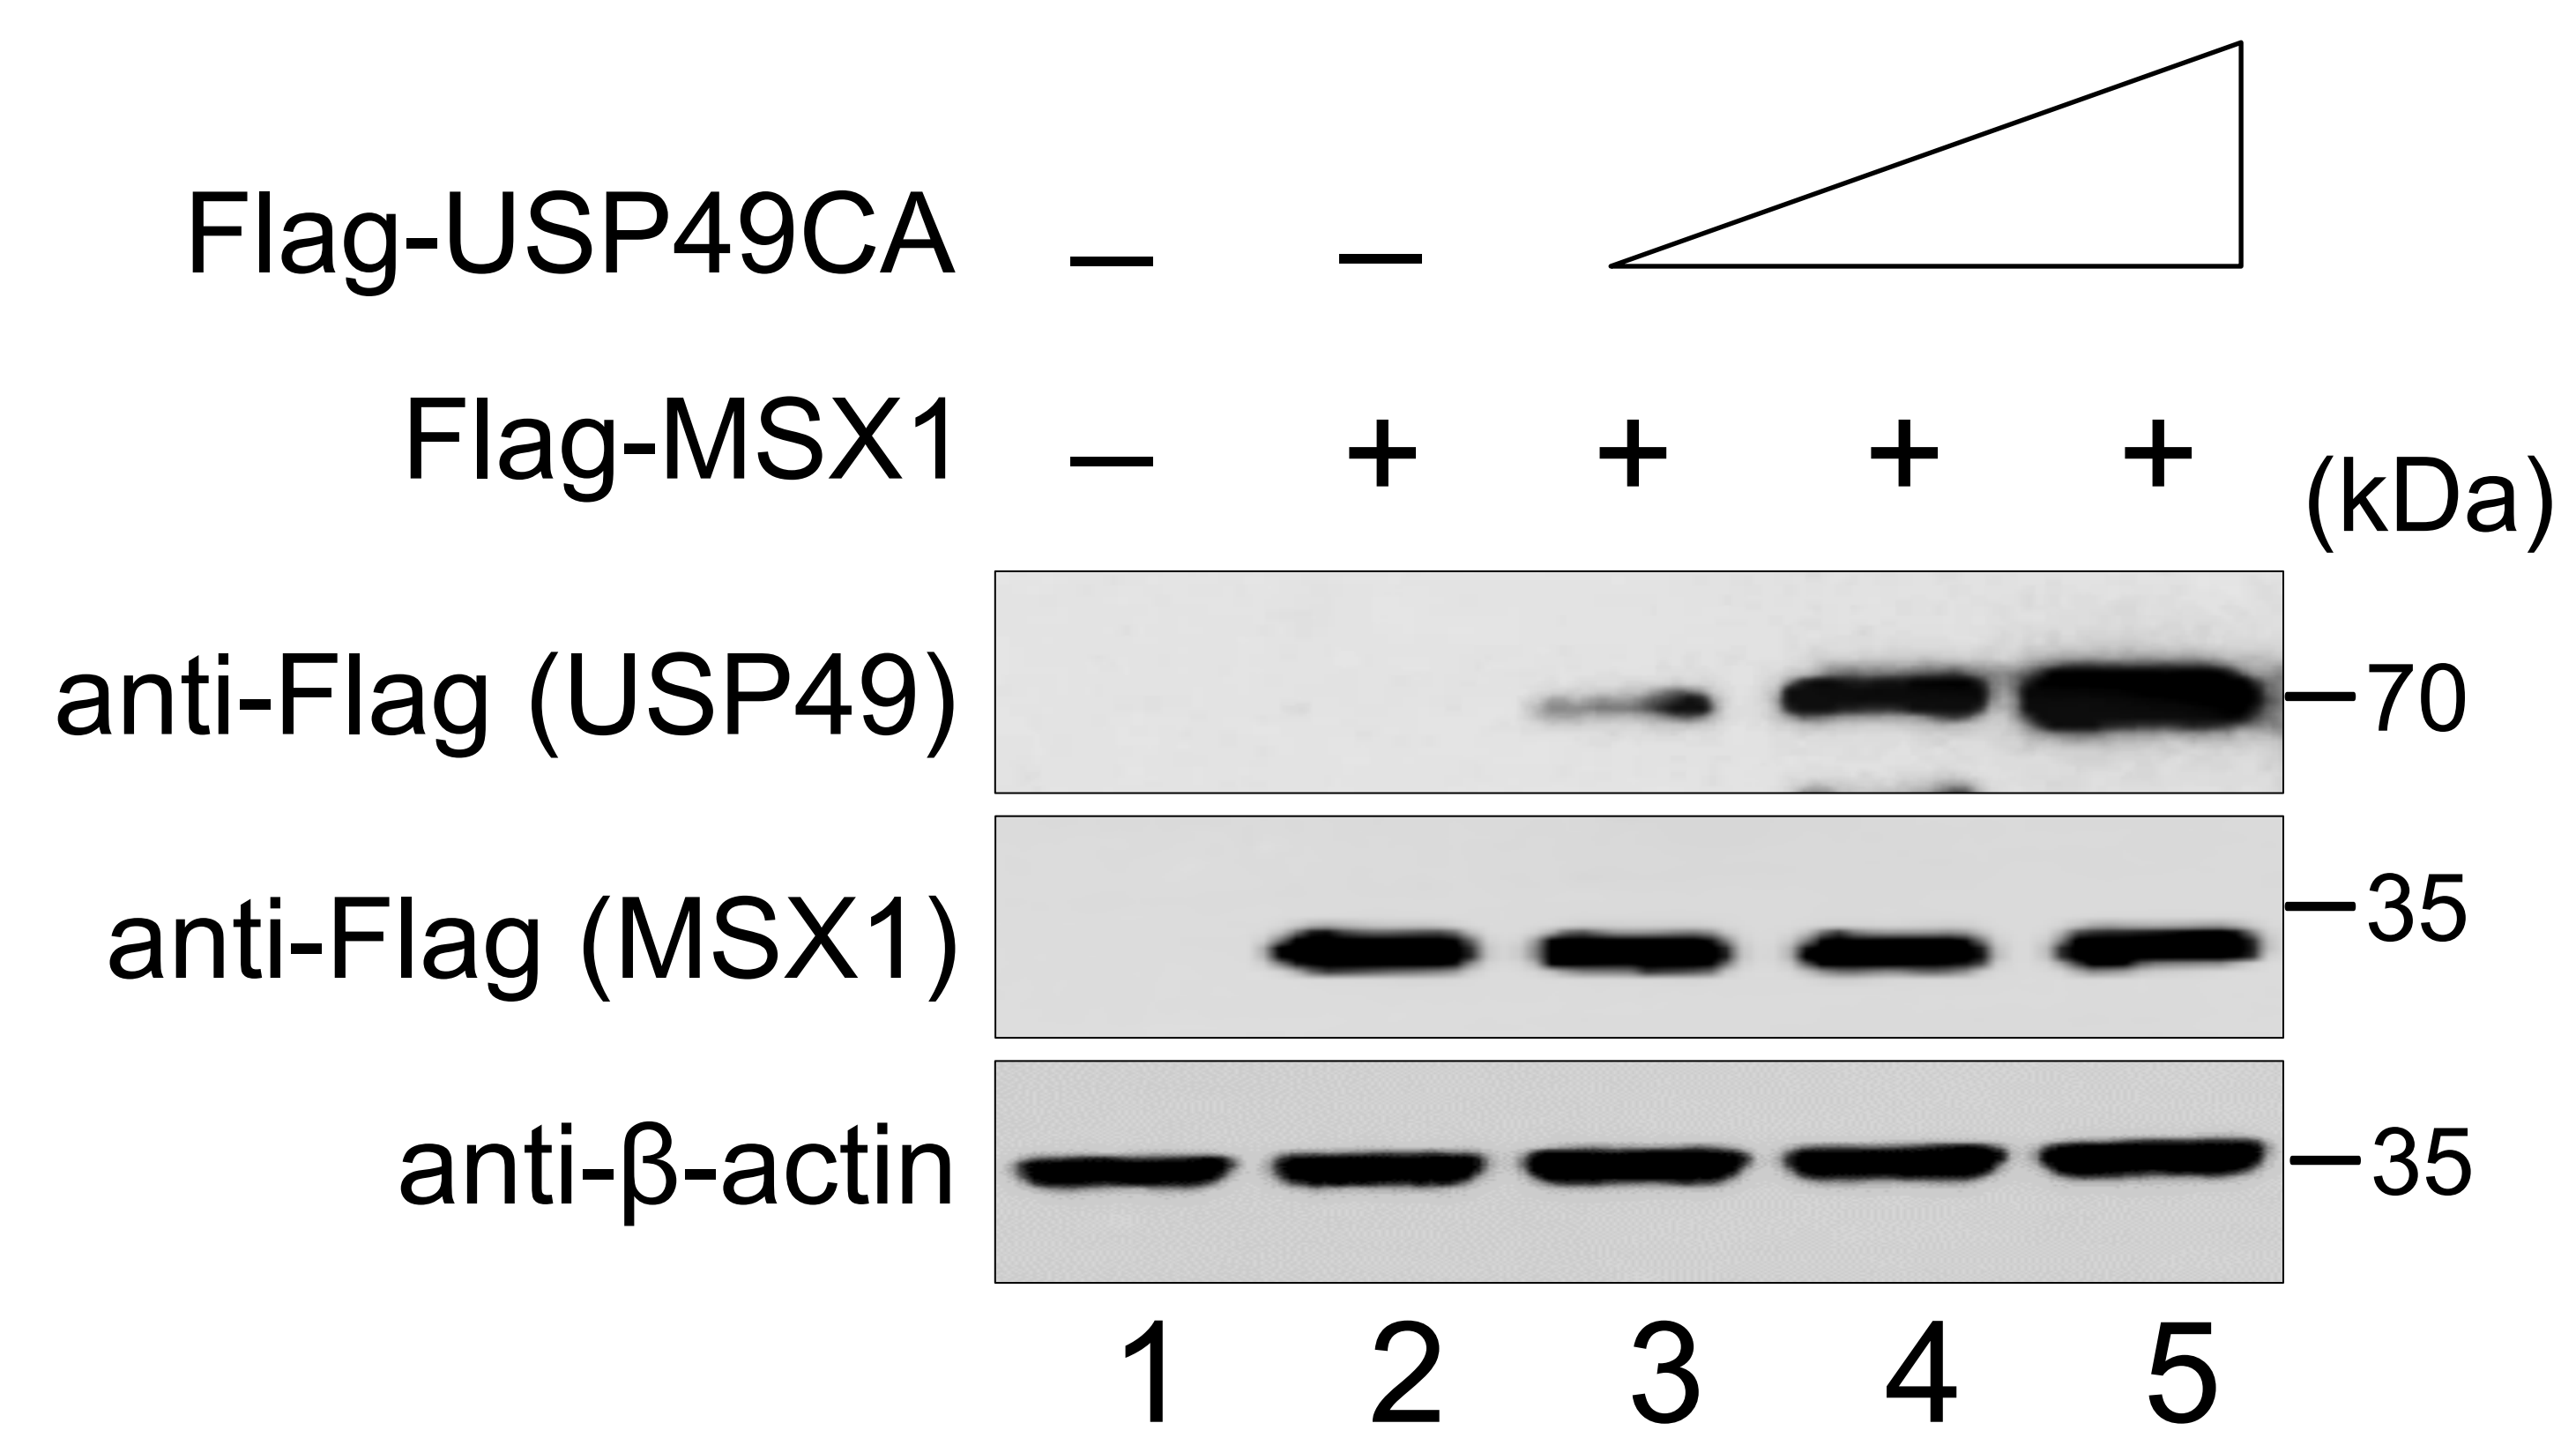

# Supplementary Fig. S4

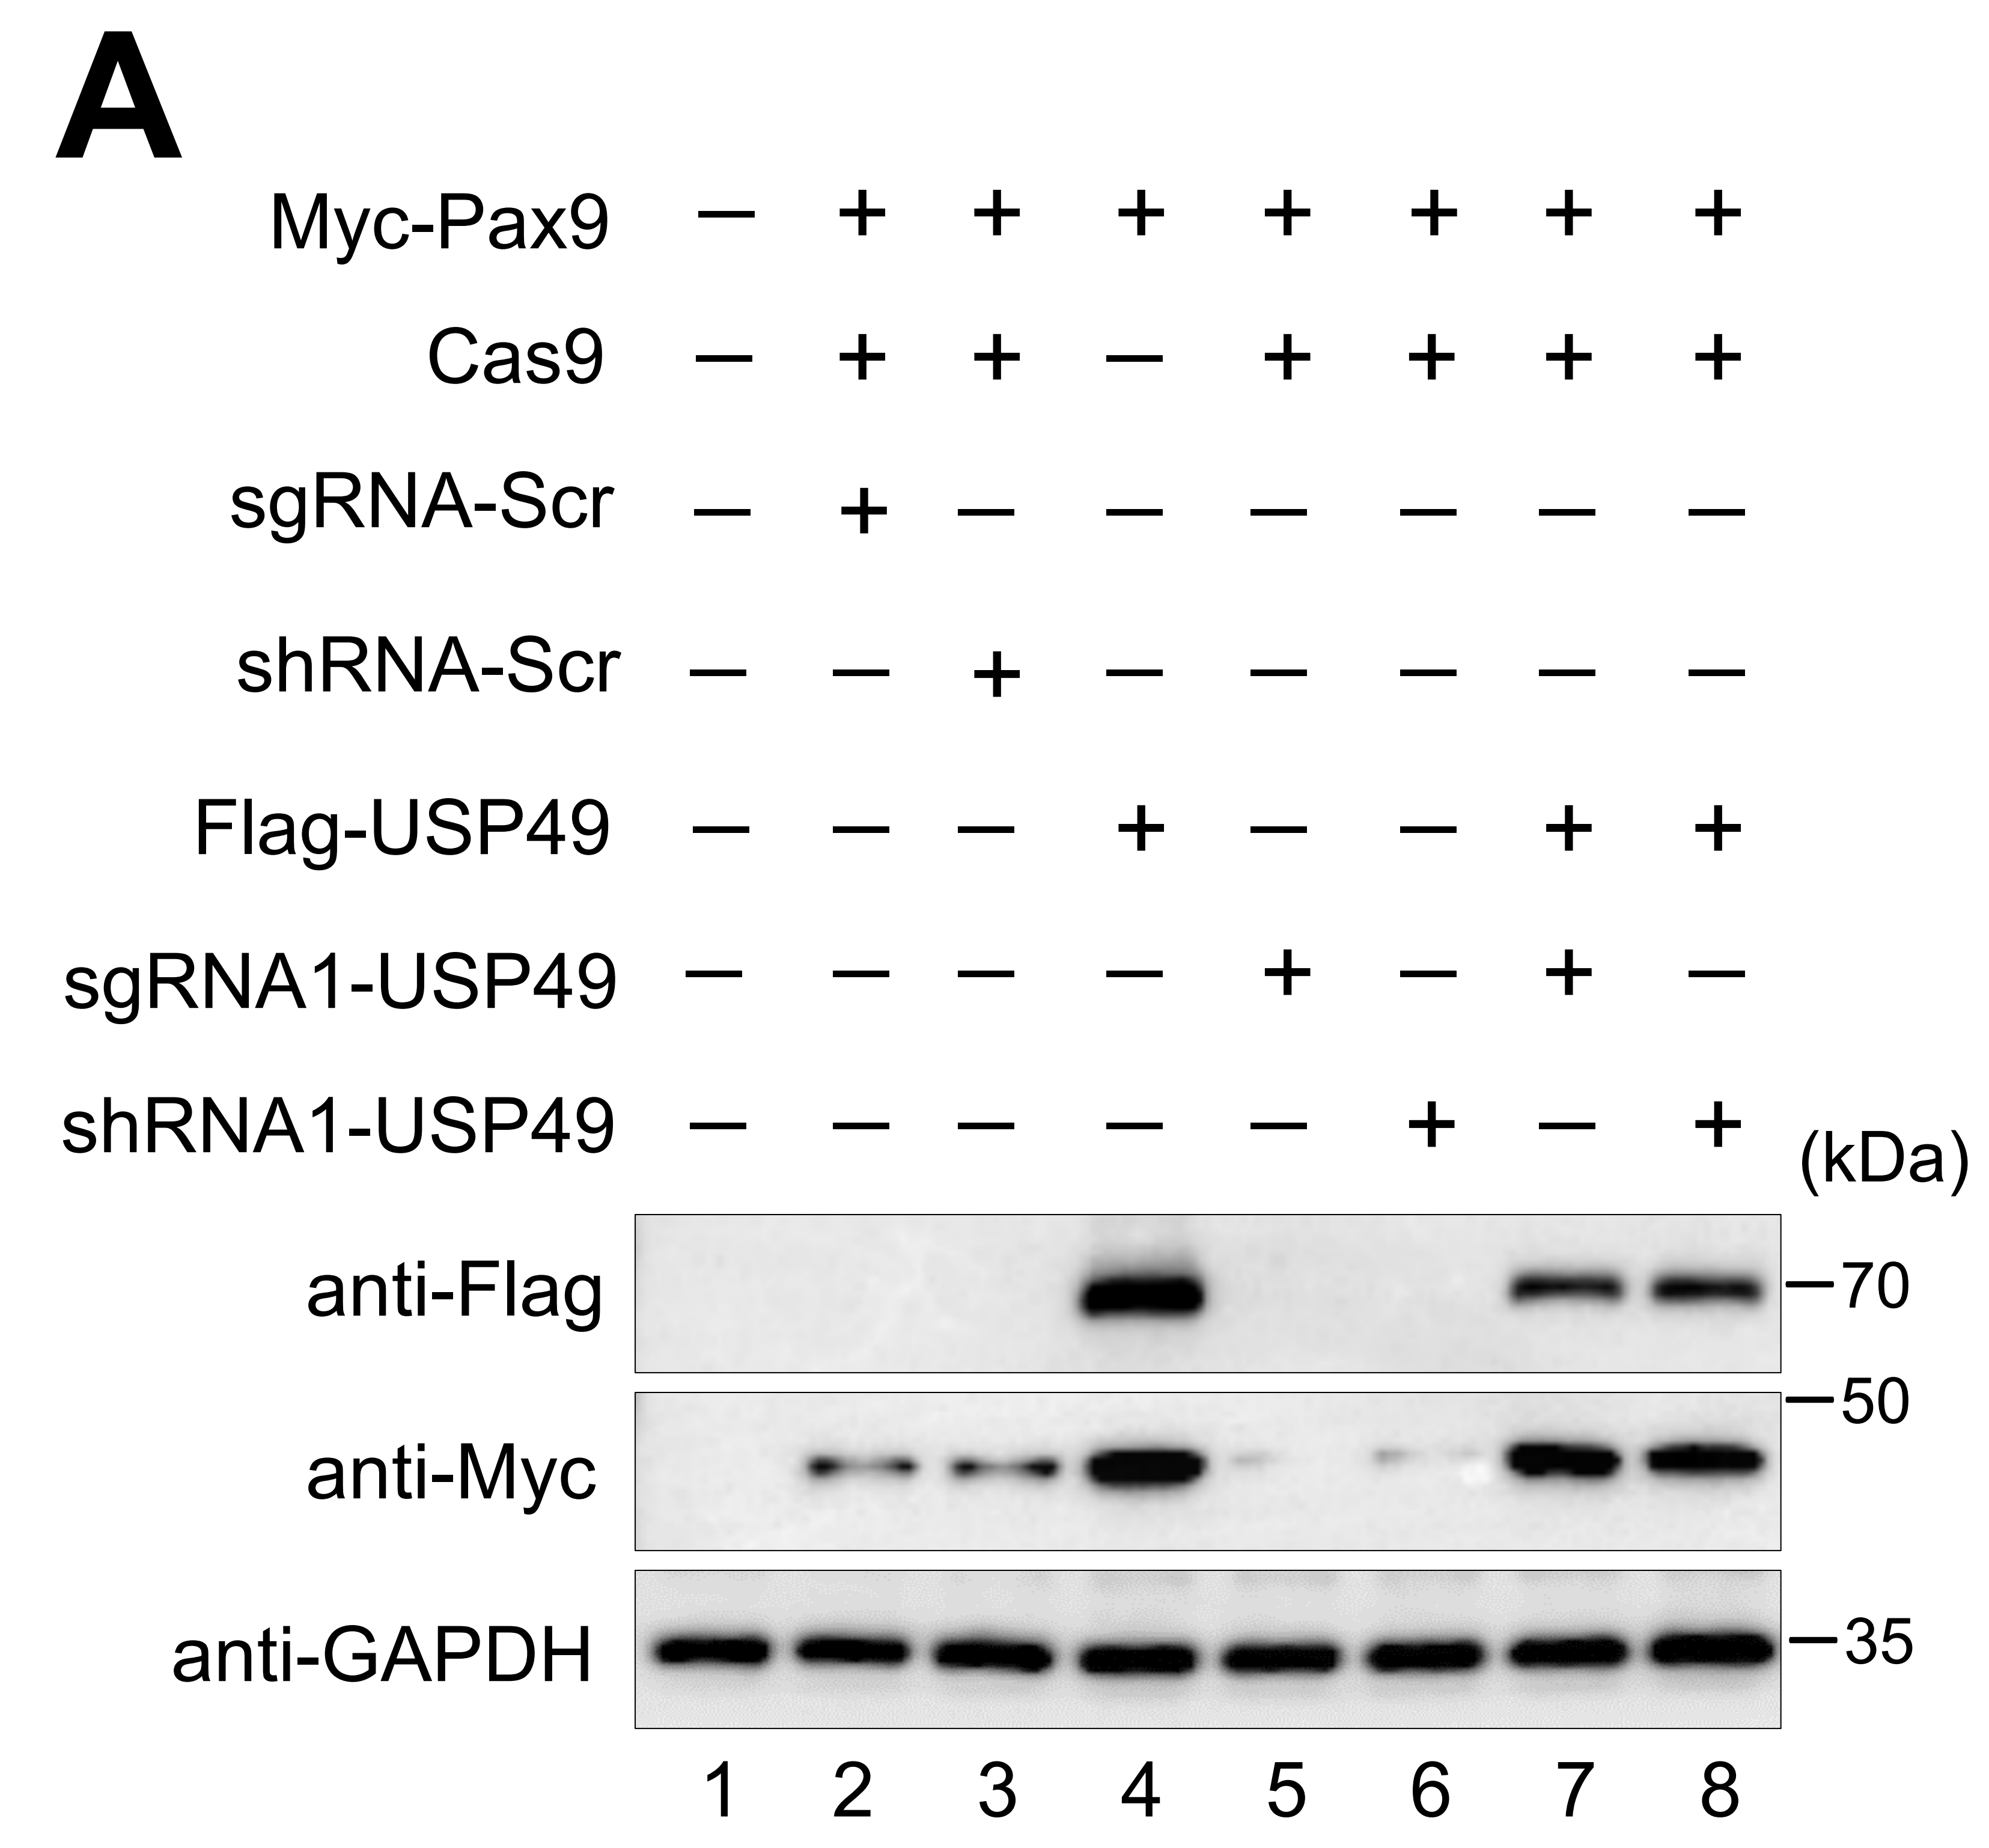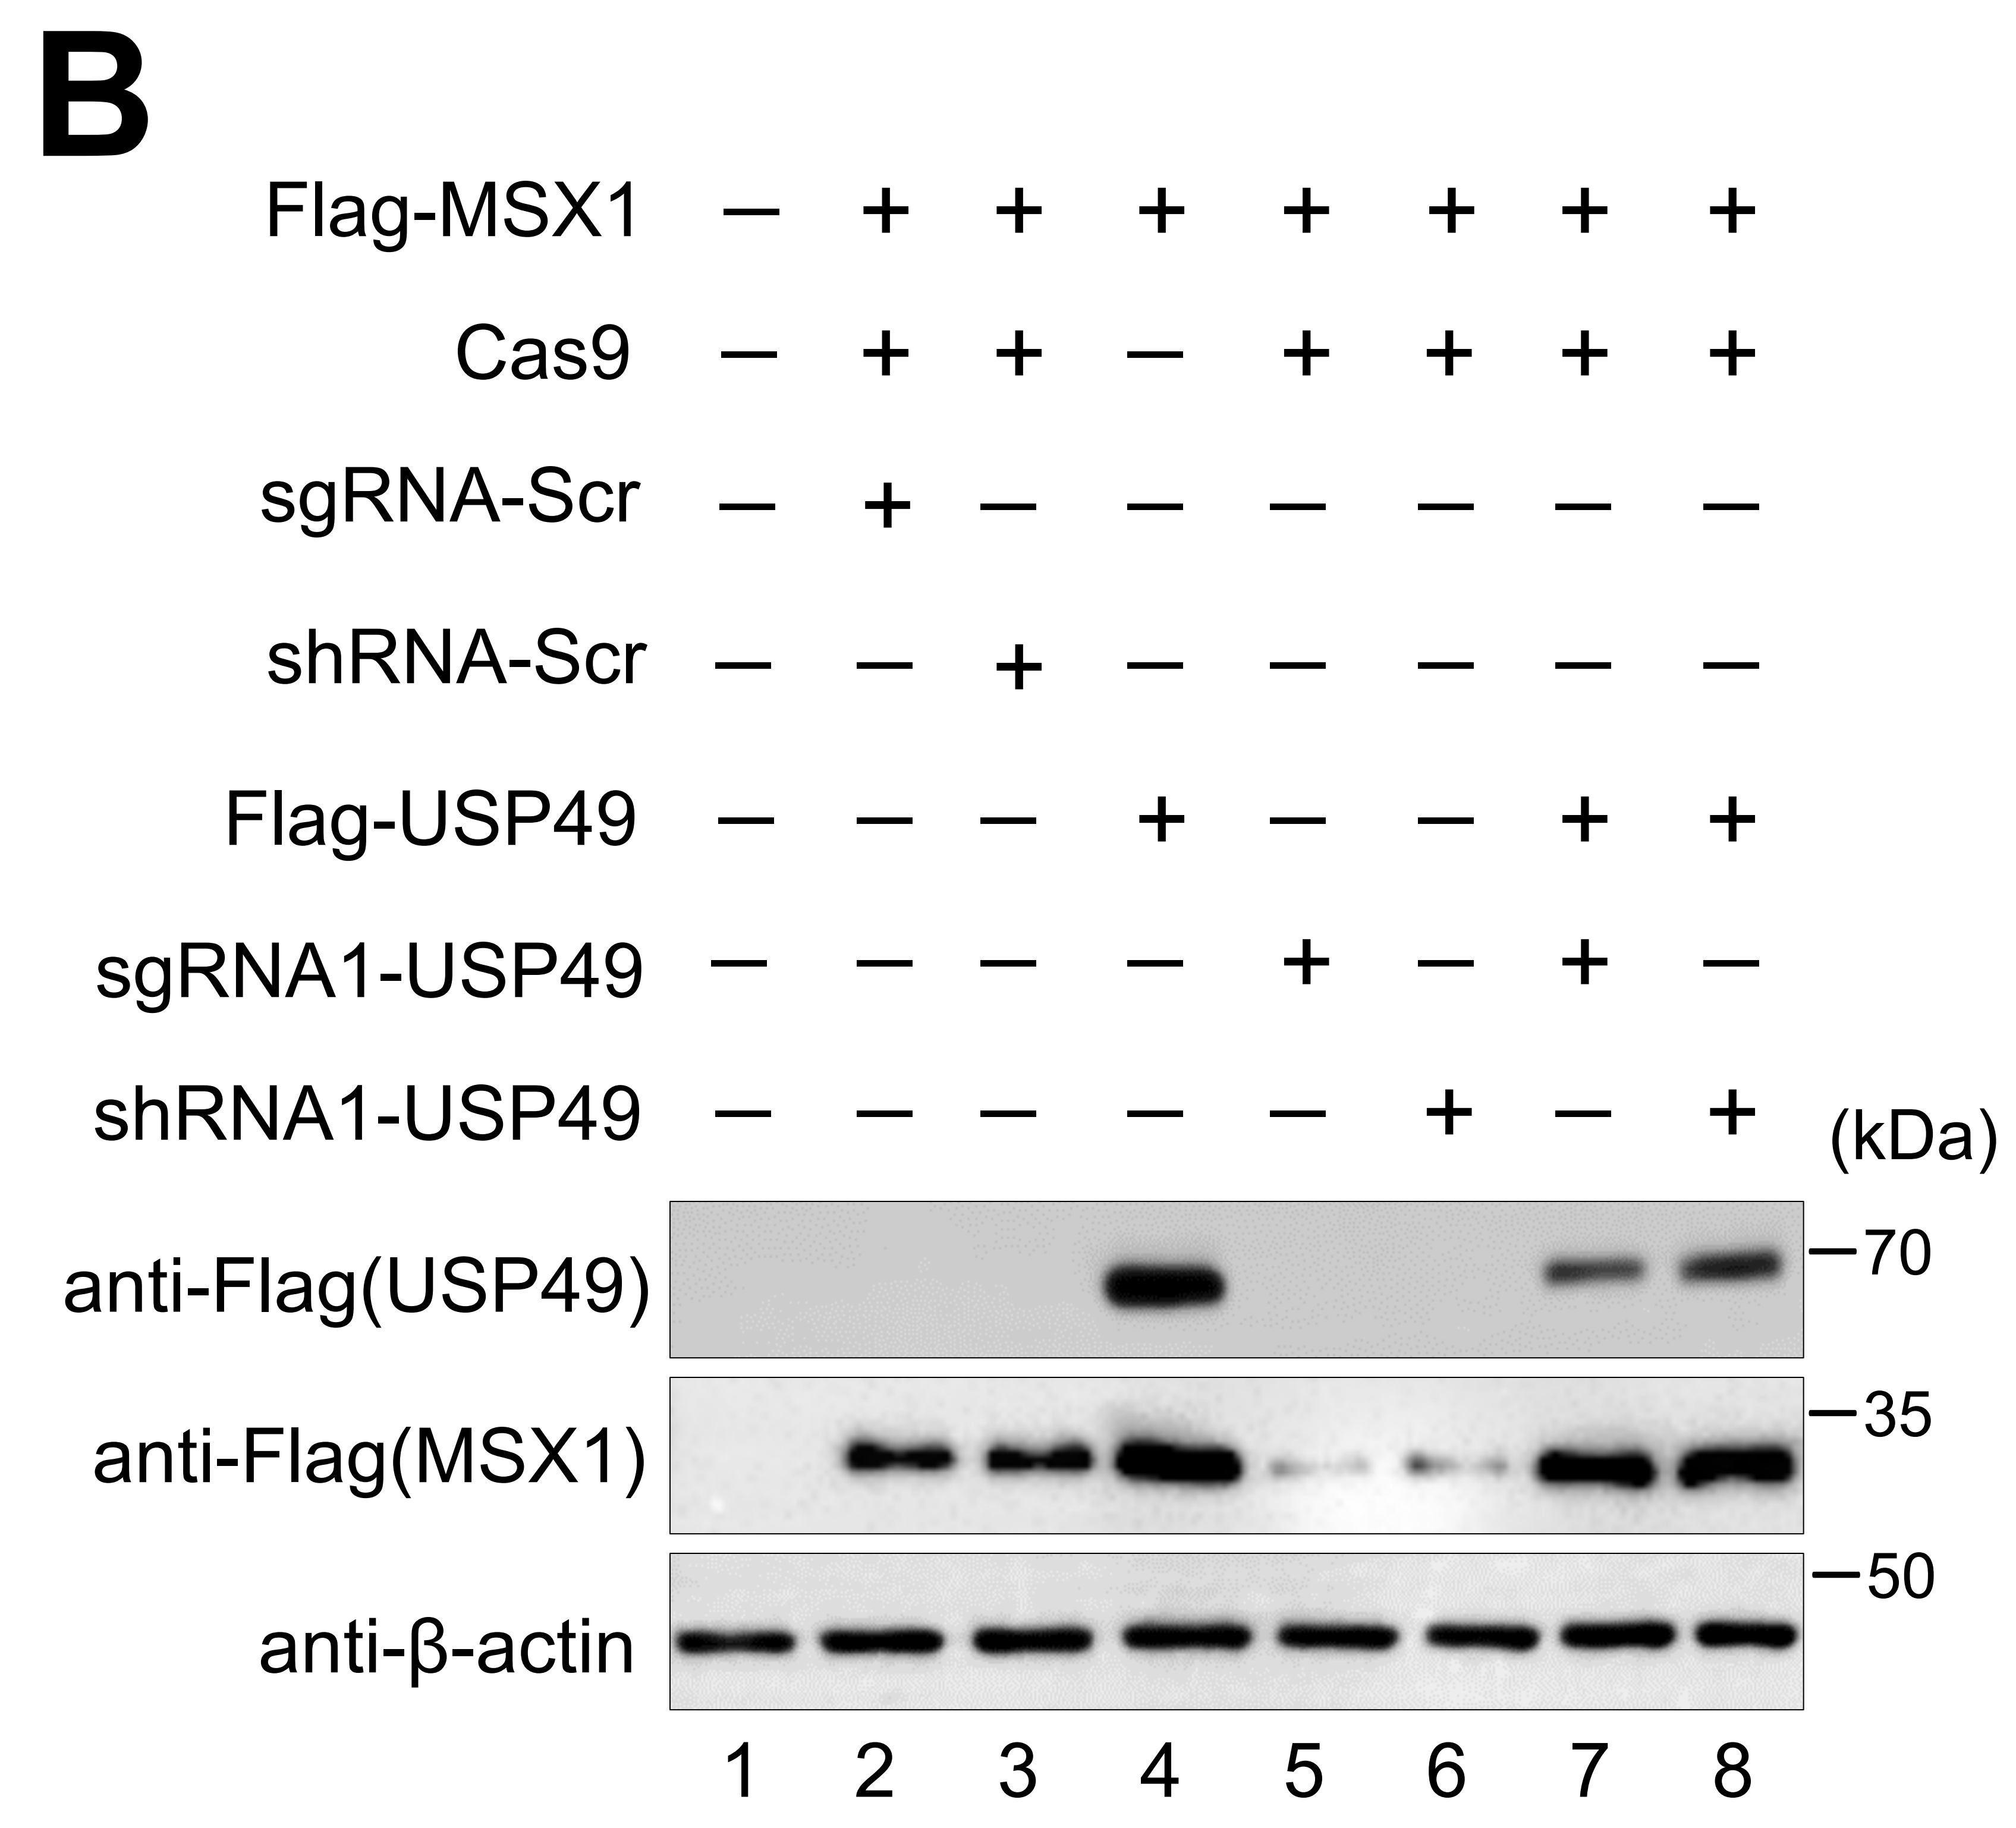

# Supplementary Fig. S5

## A

### PAX9

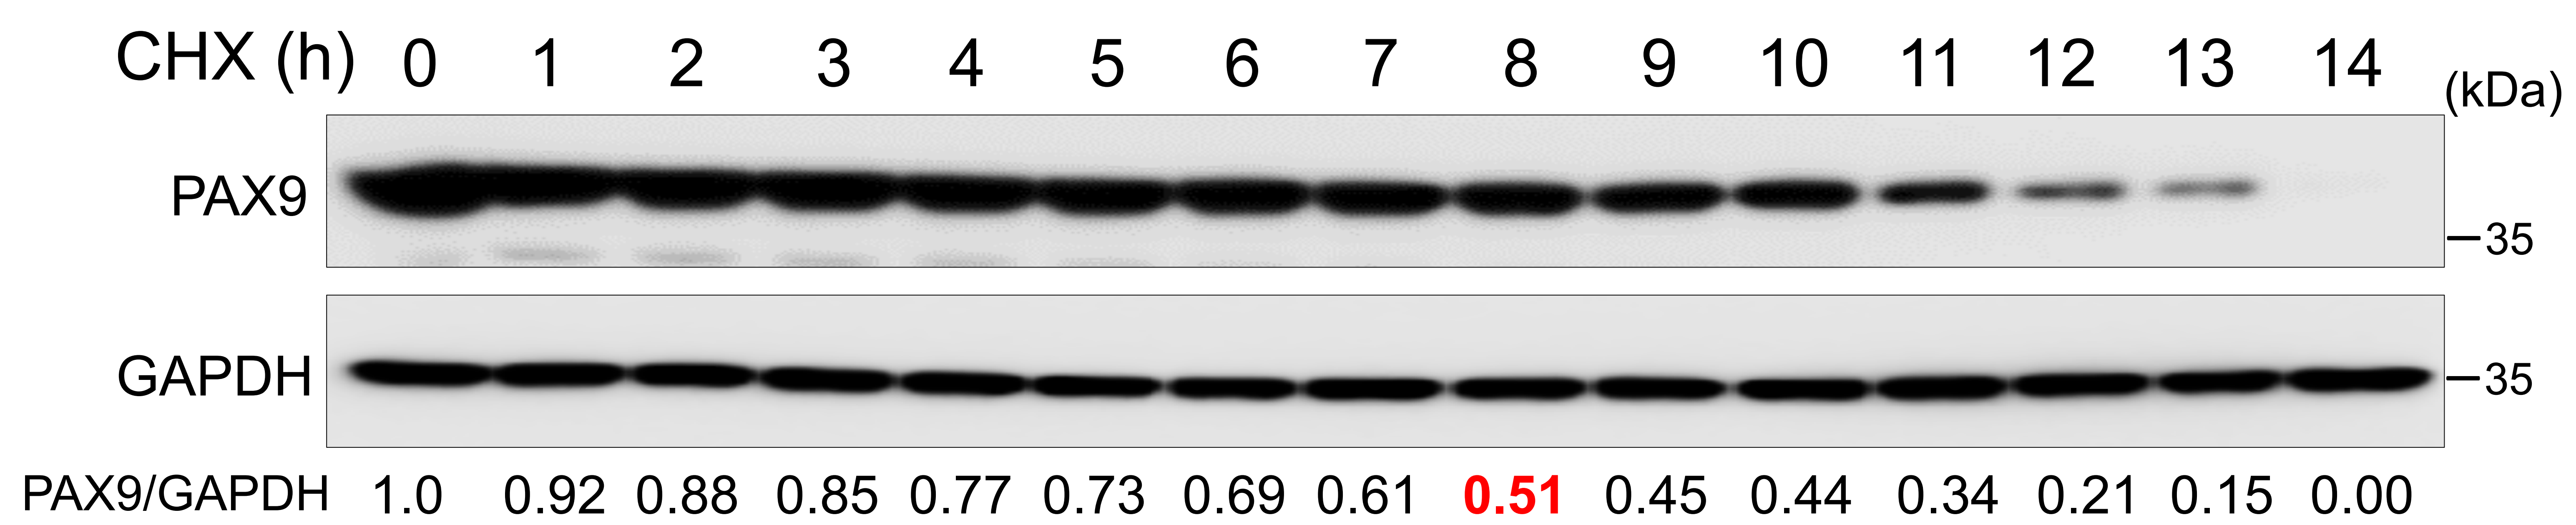

## B

### MSX1

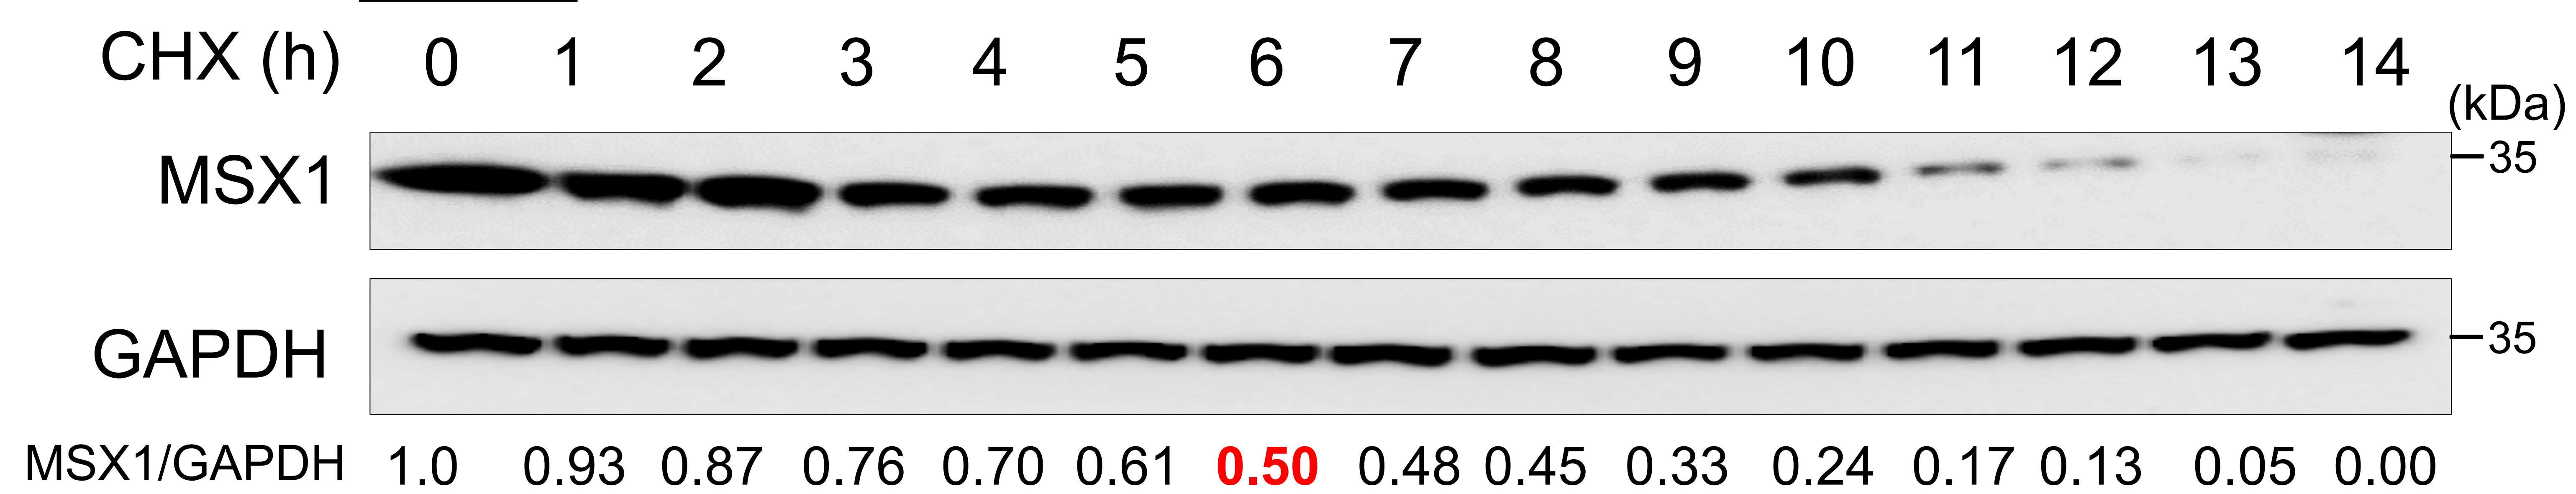

## C

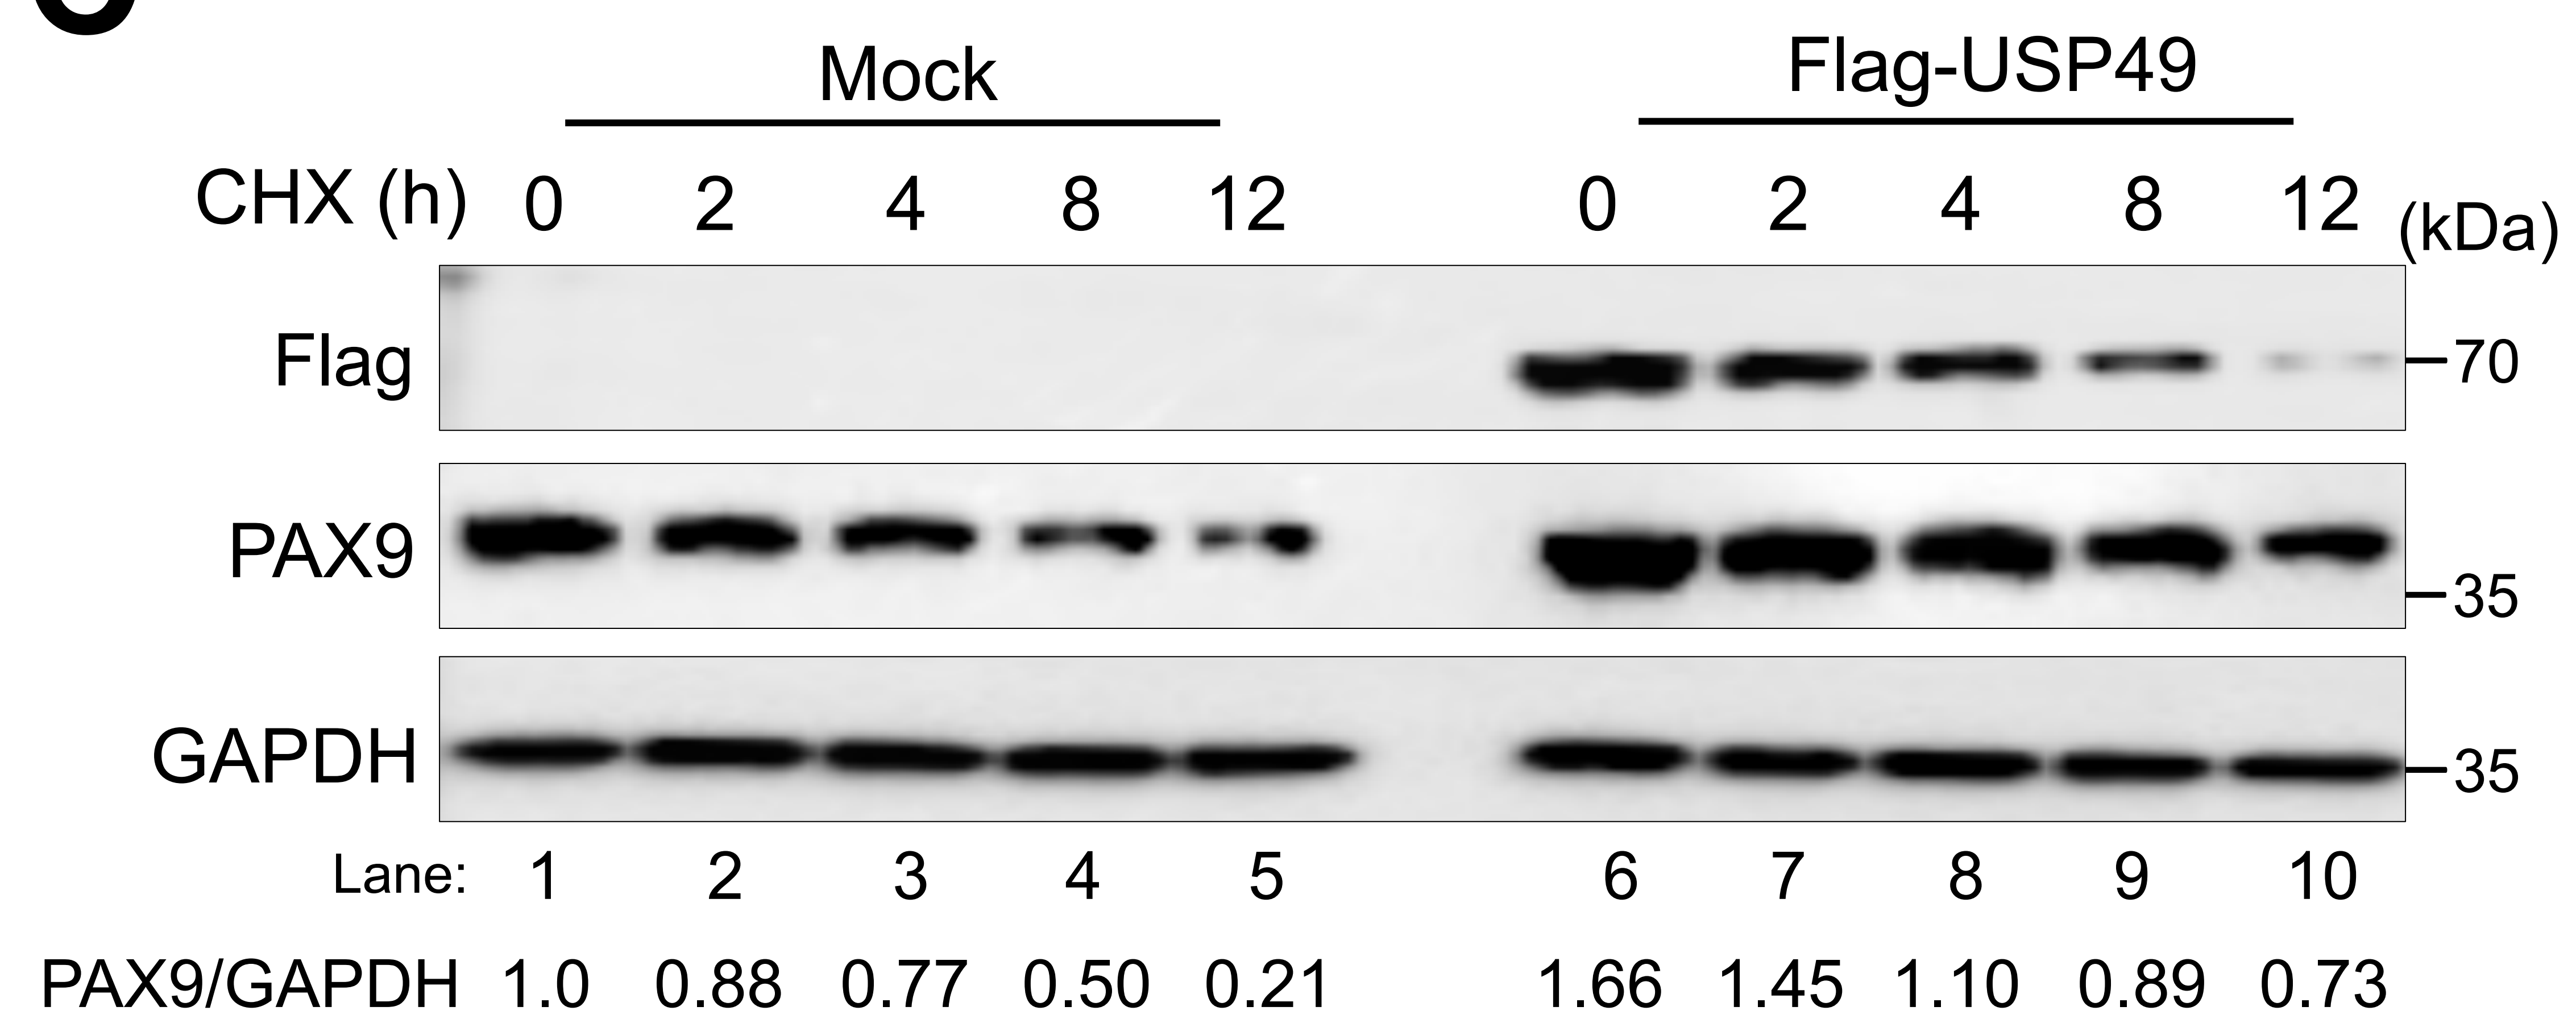

## D

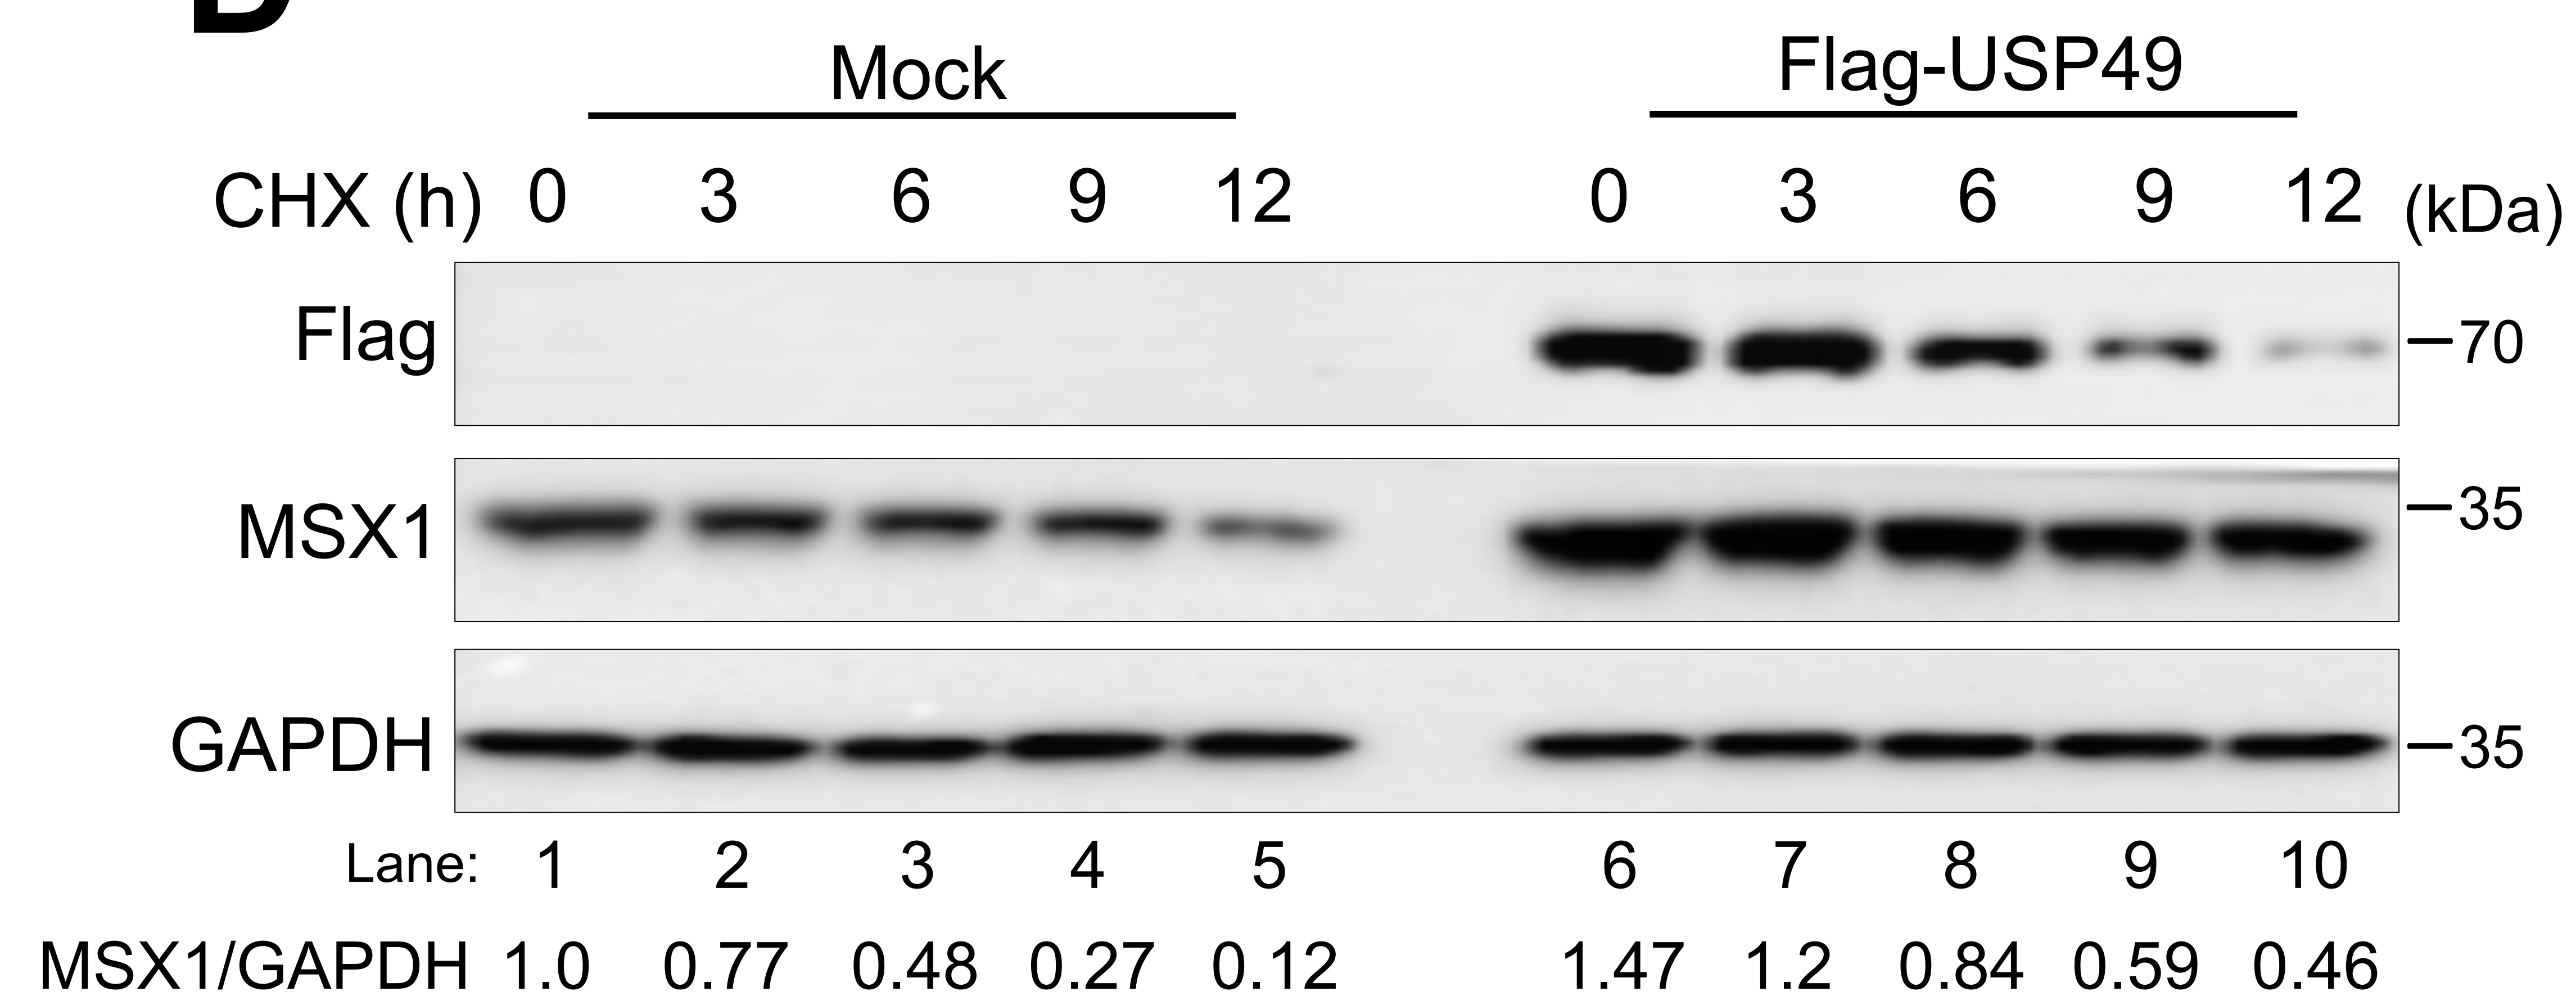

# Supplementary Fig. S6

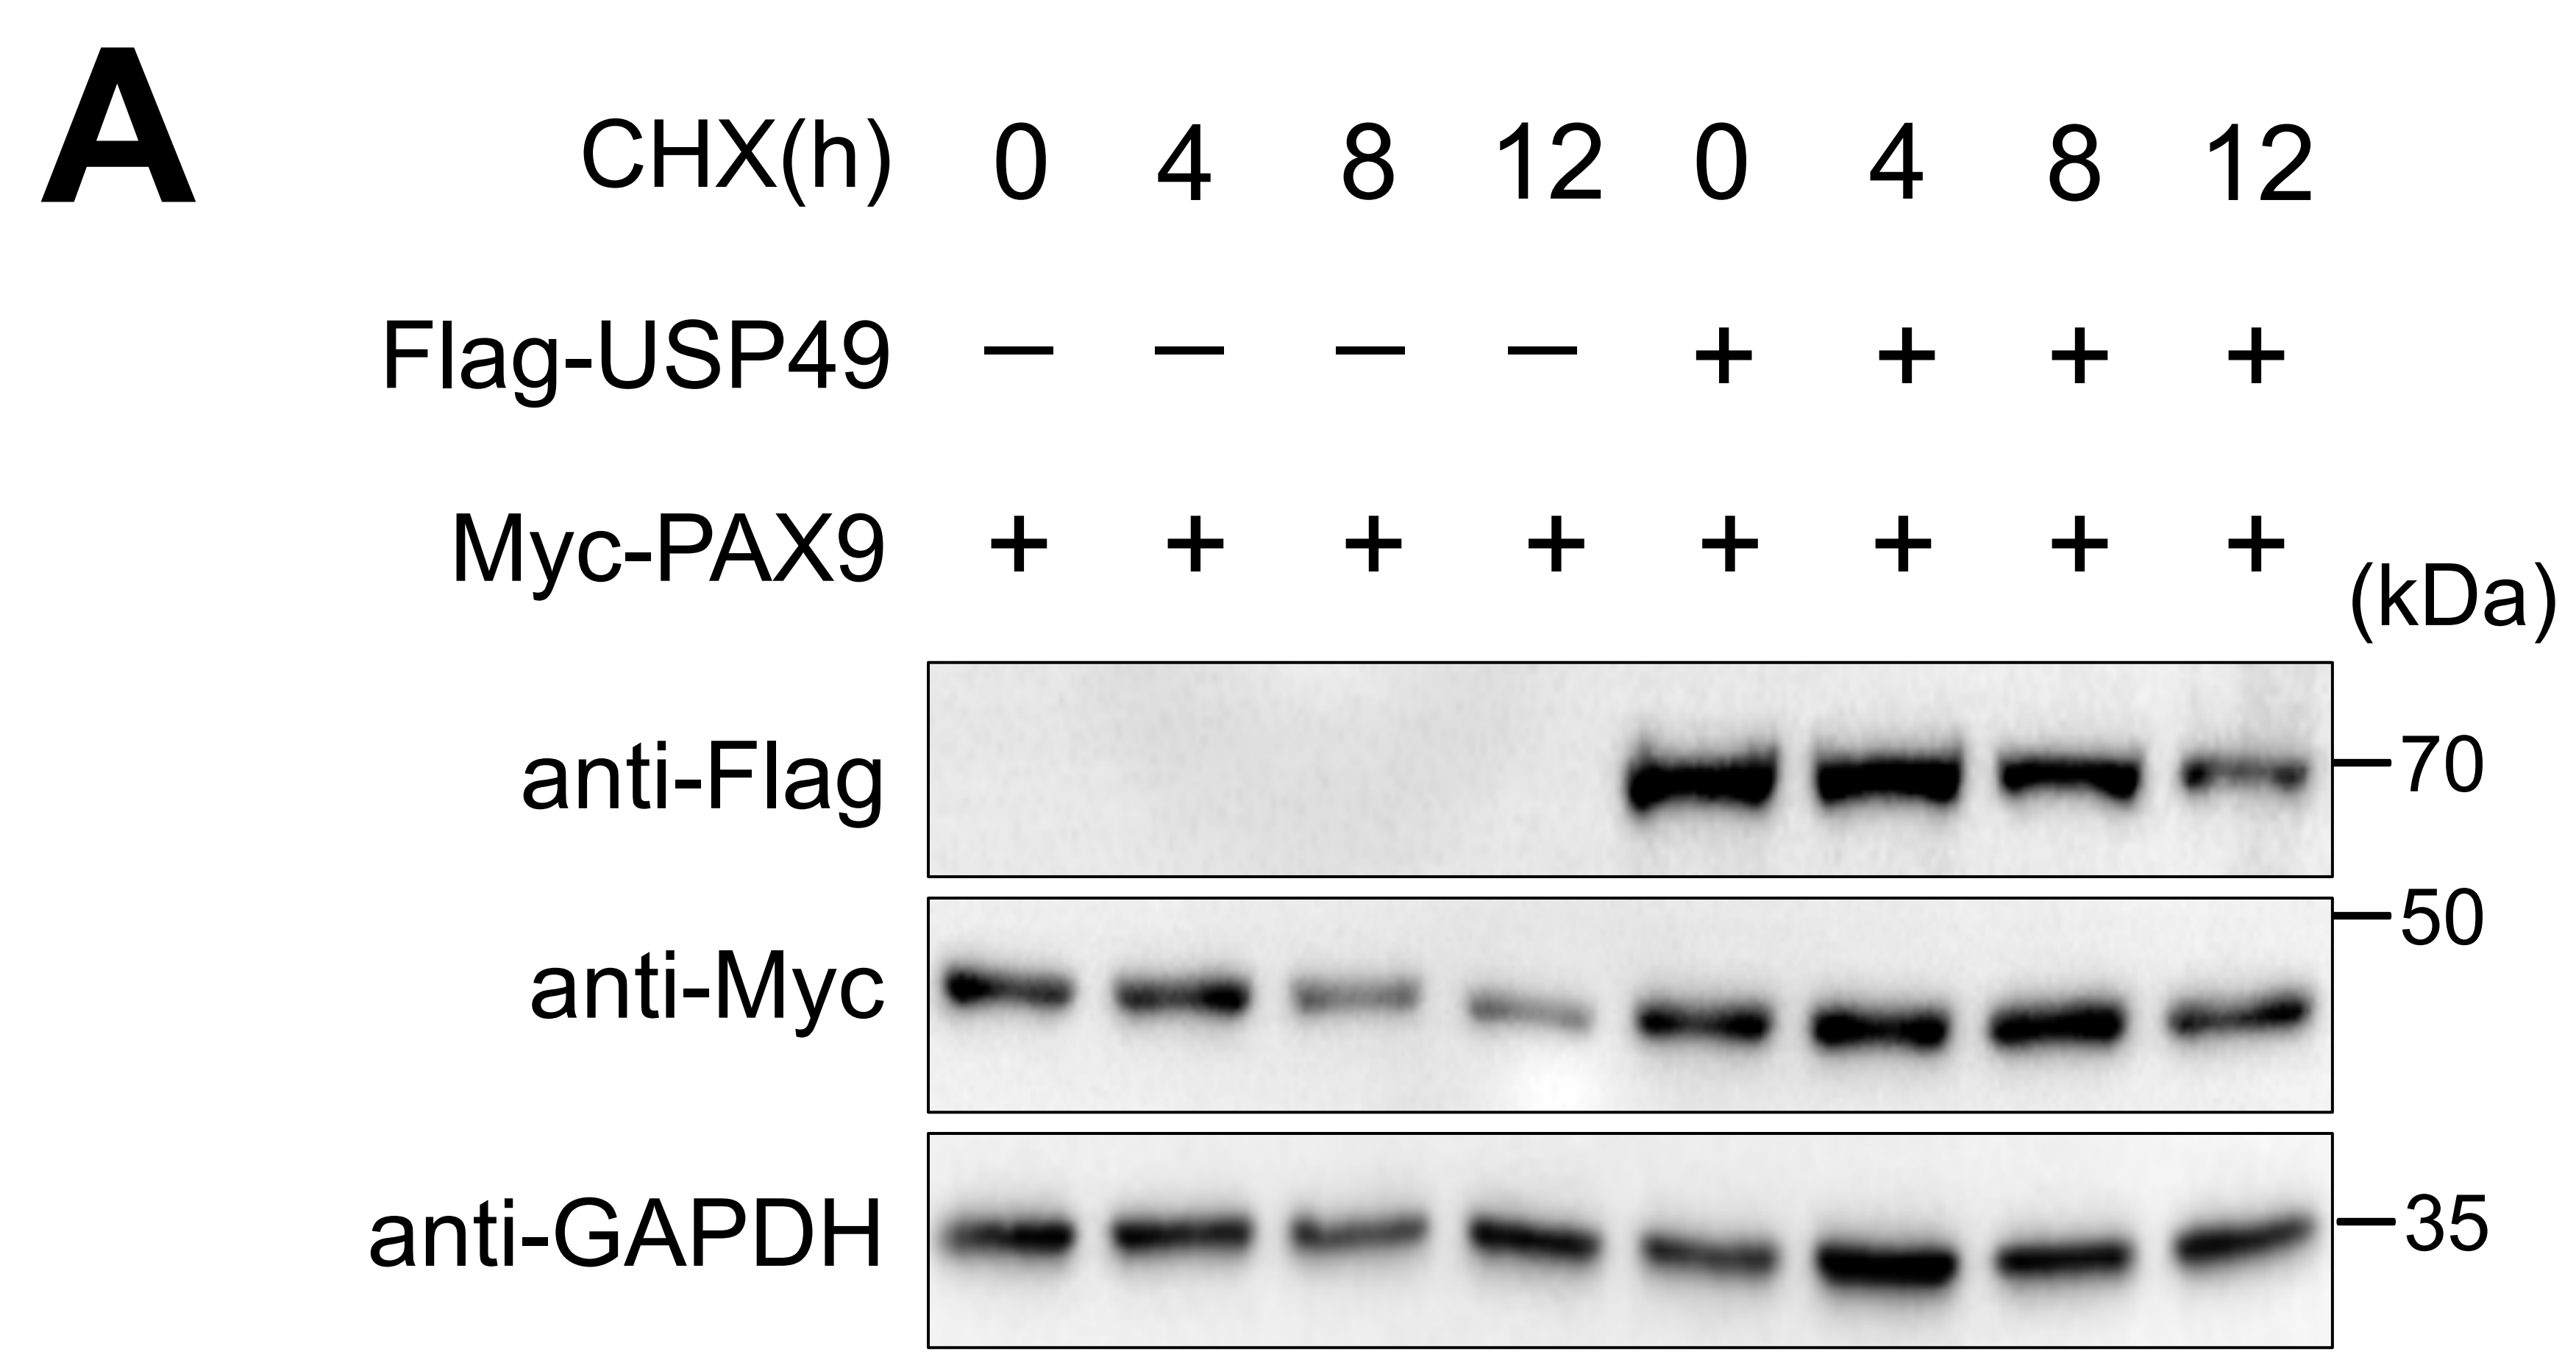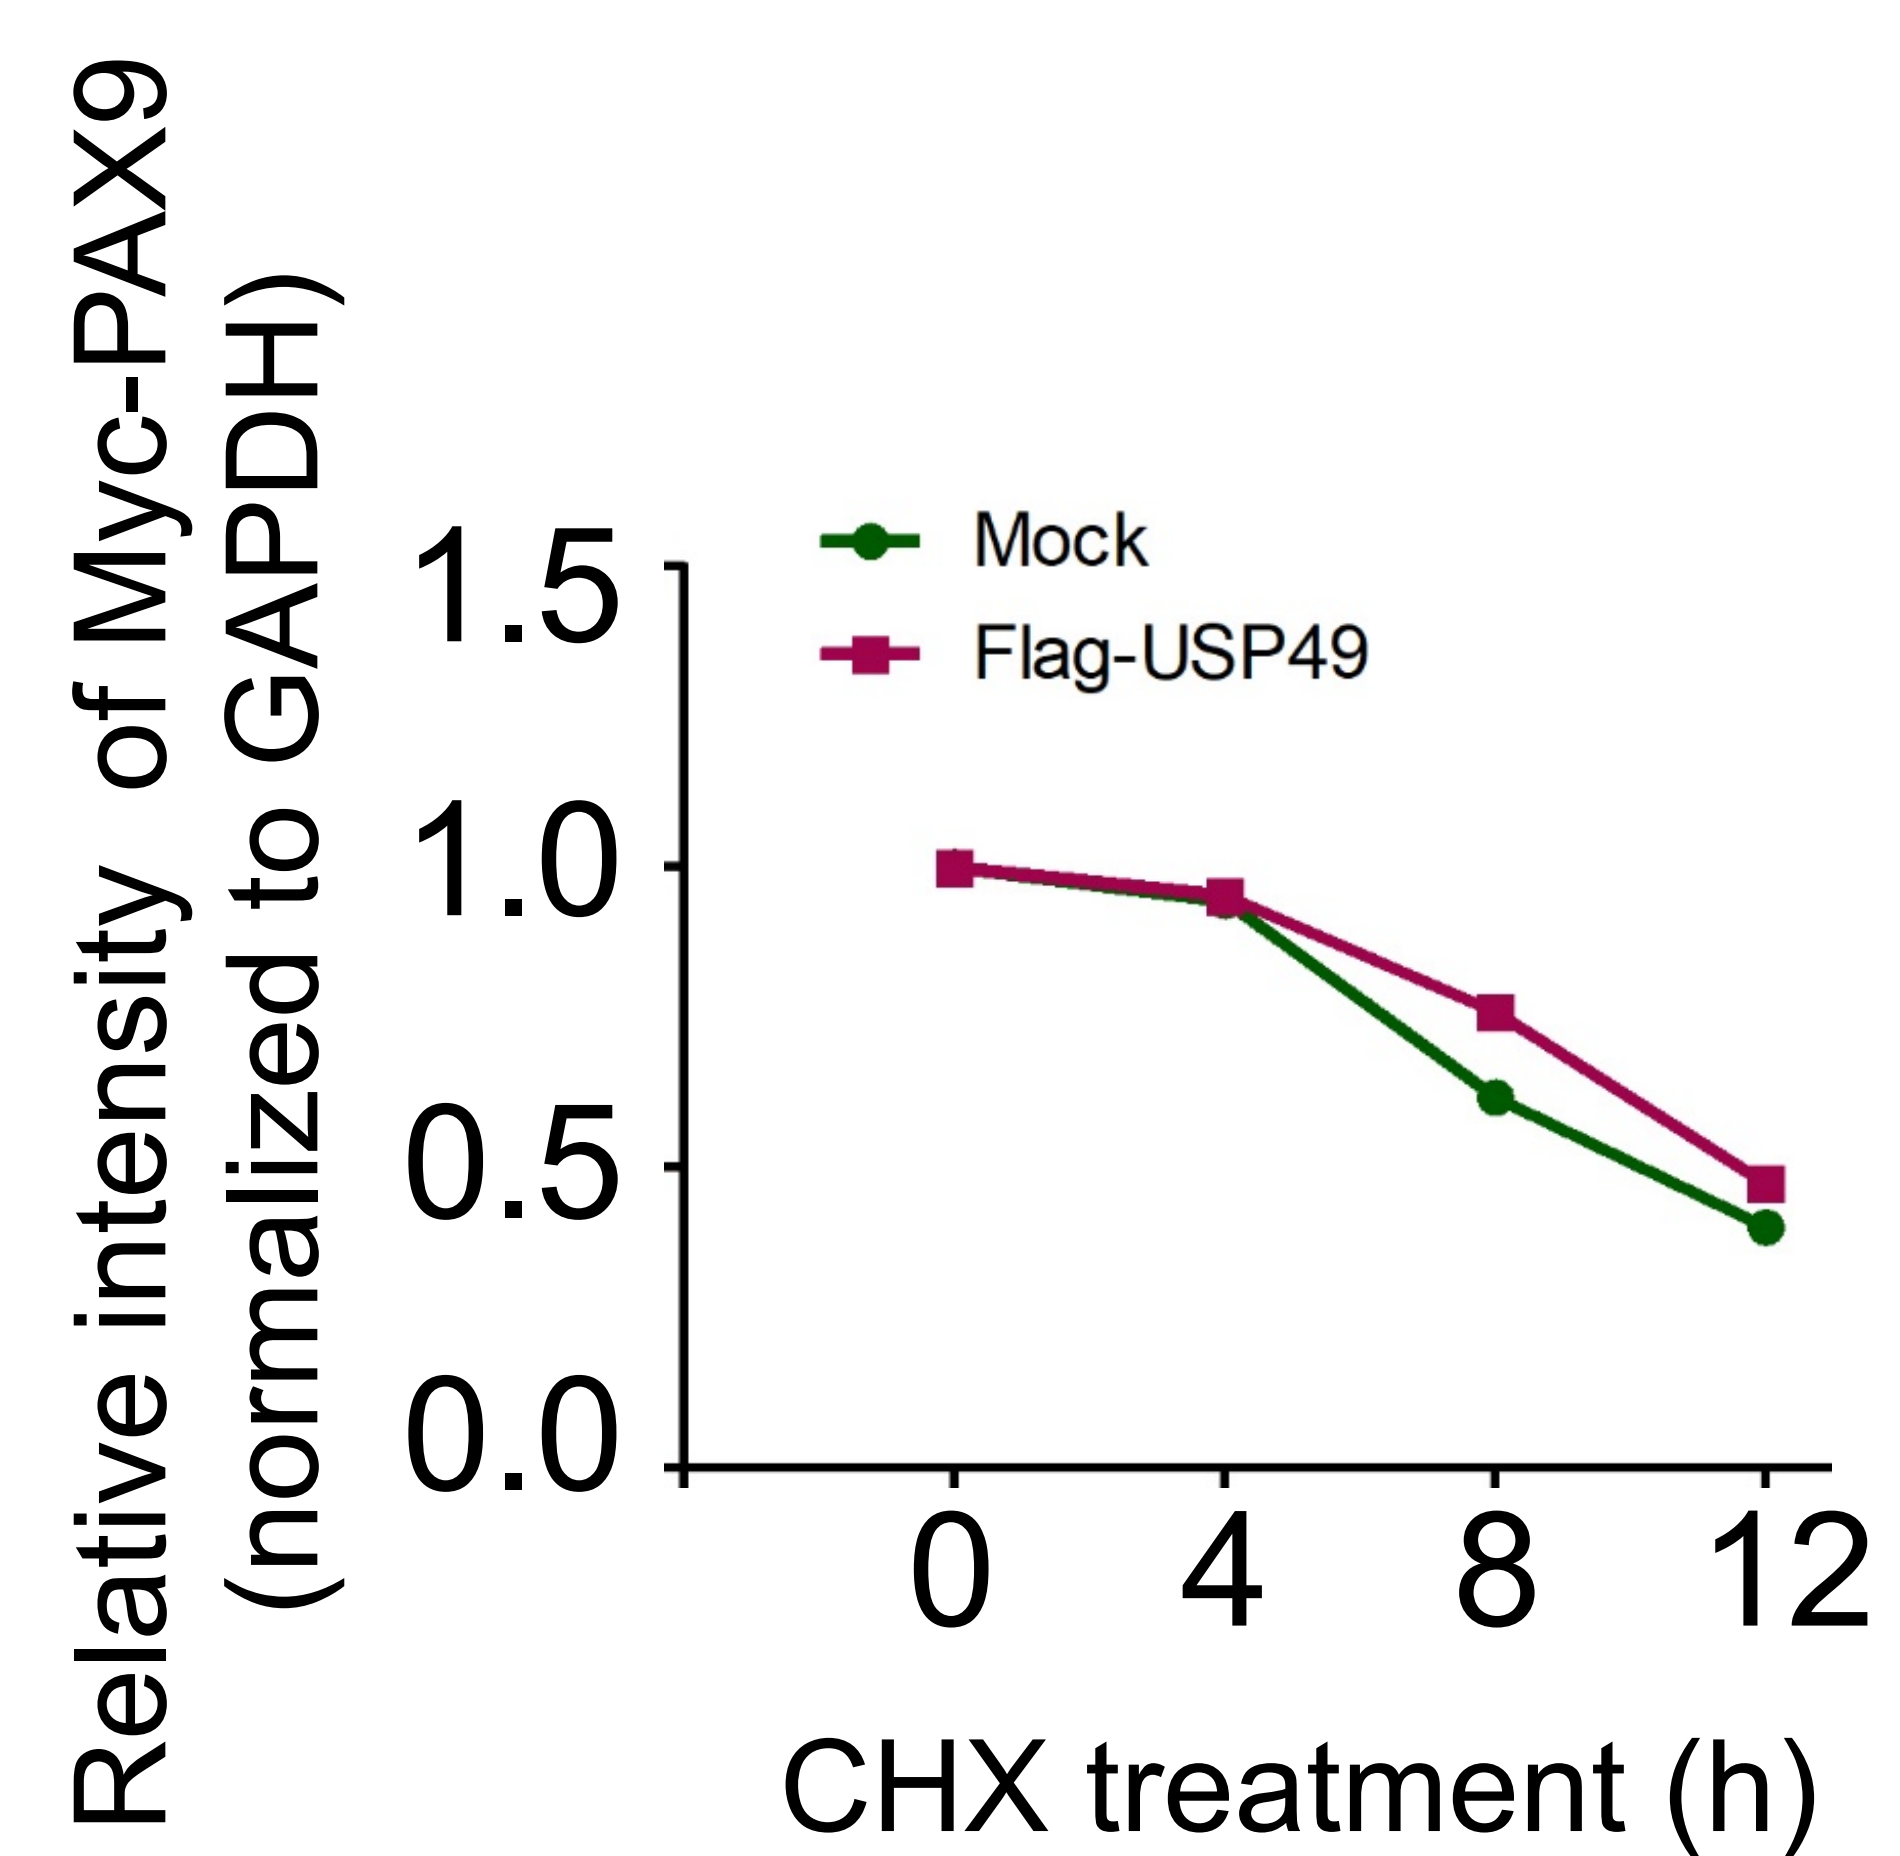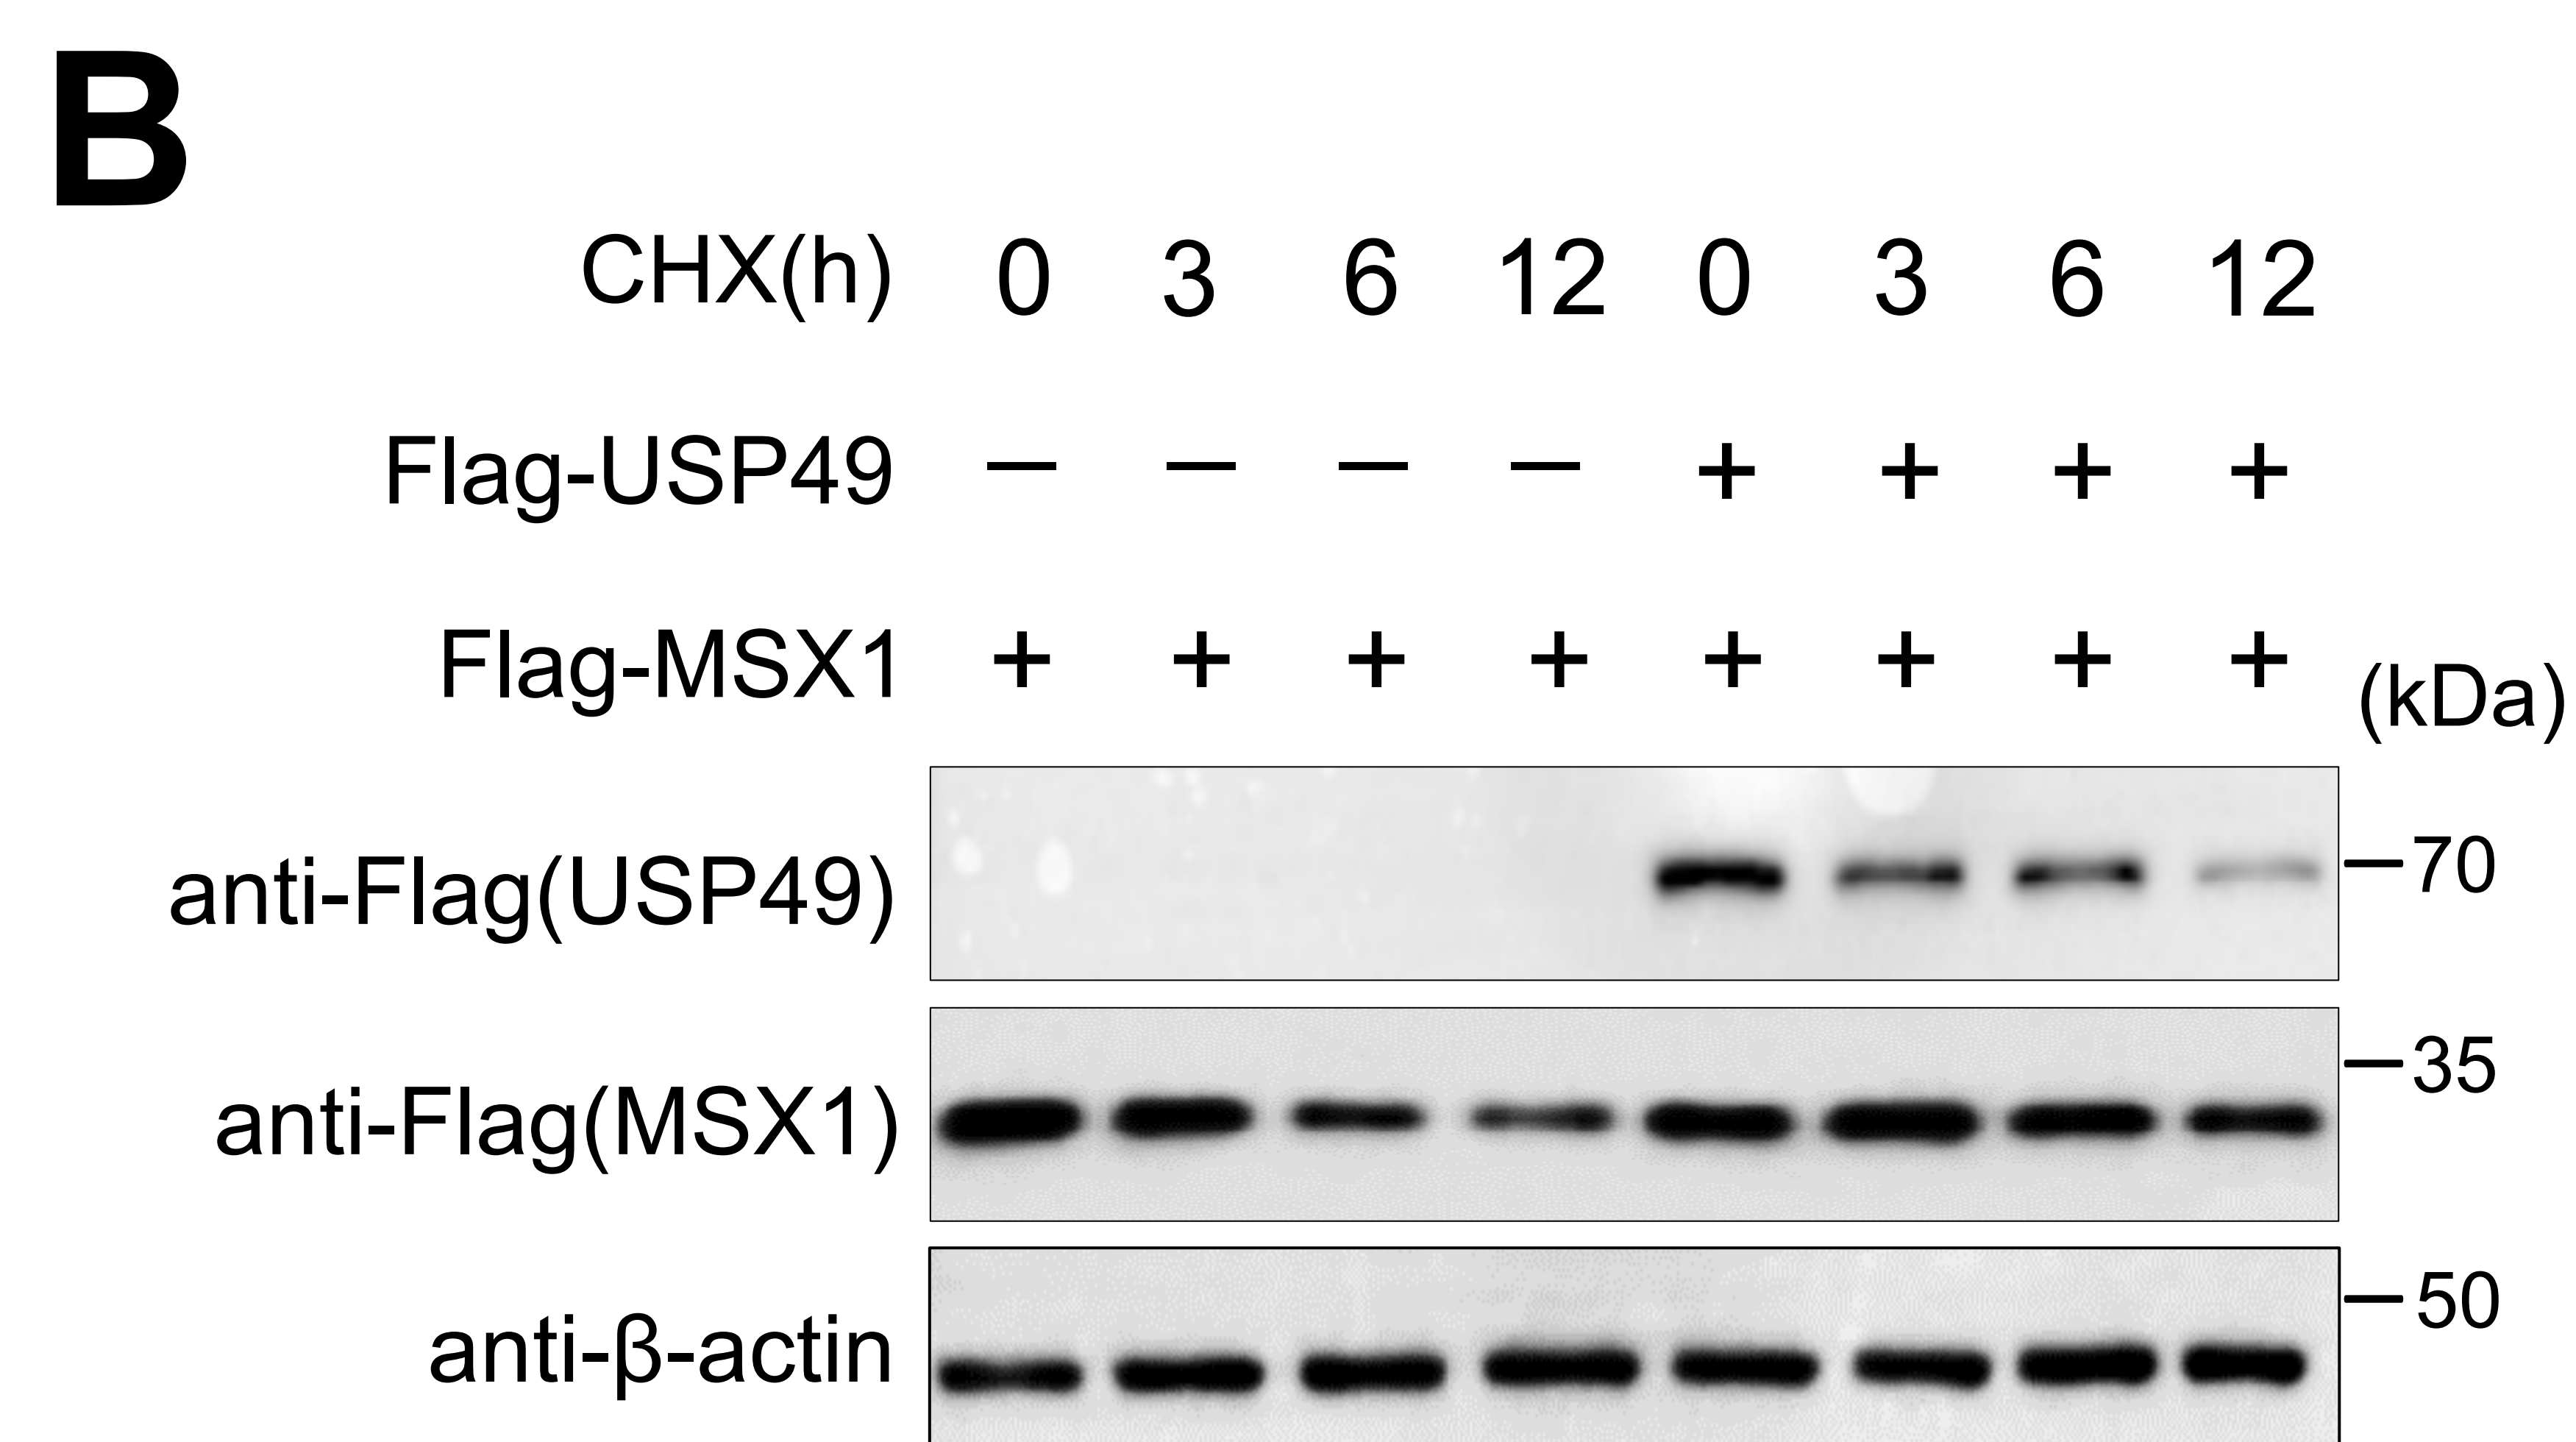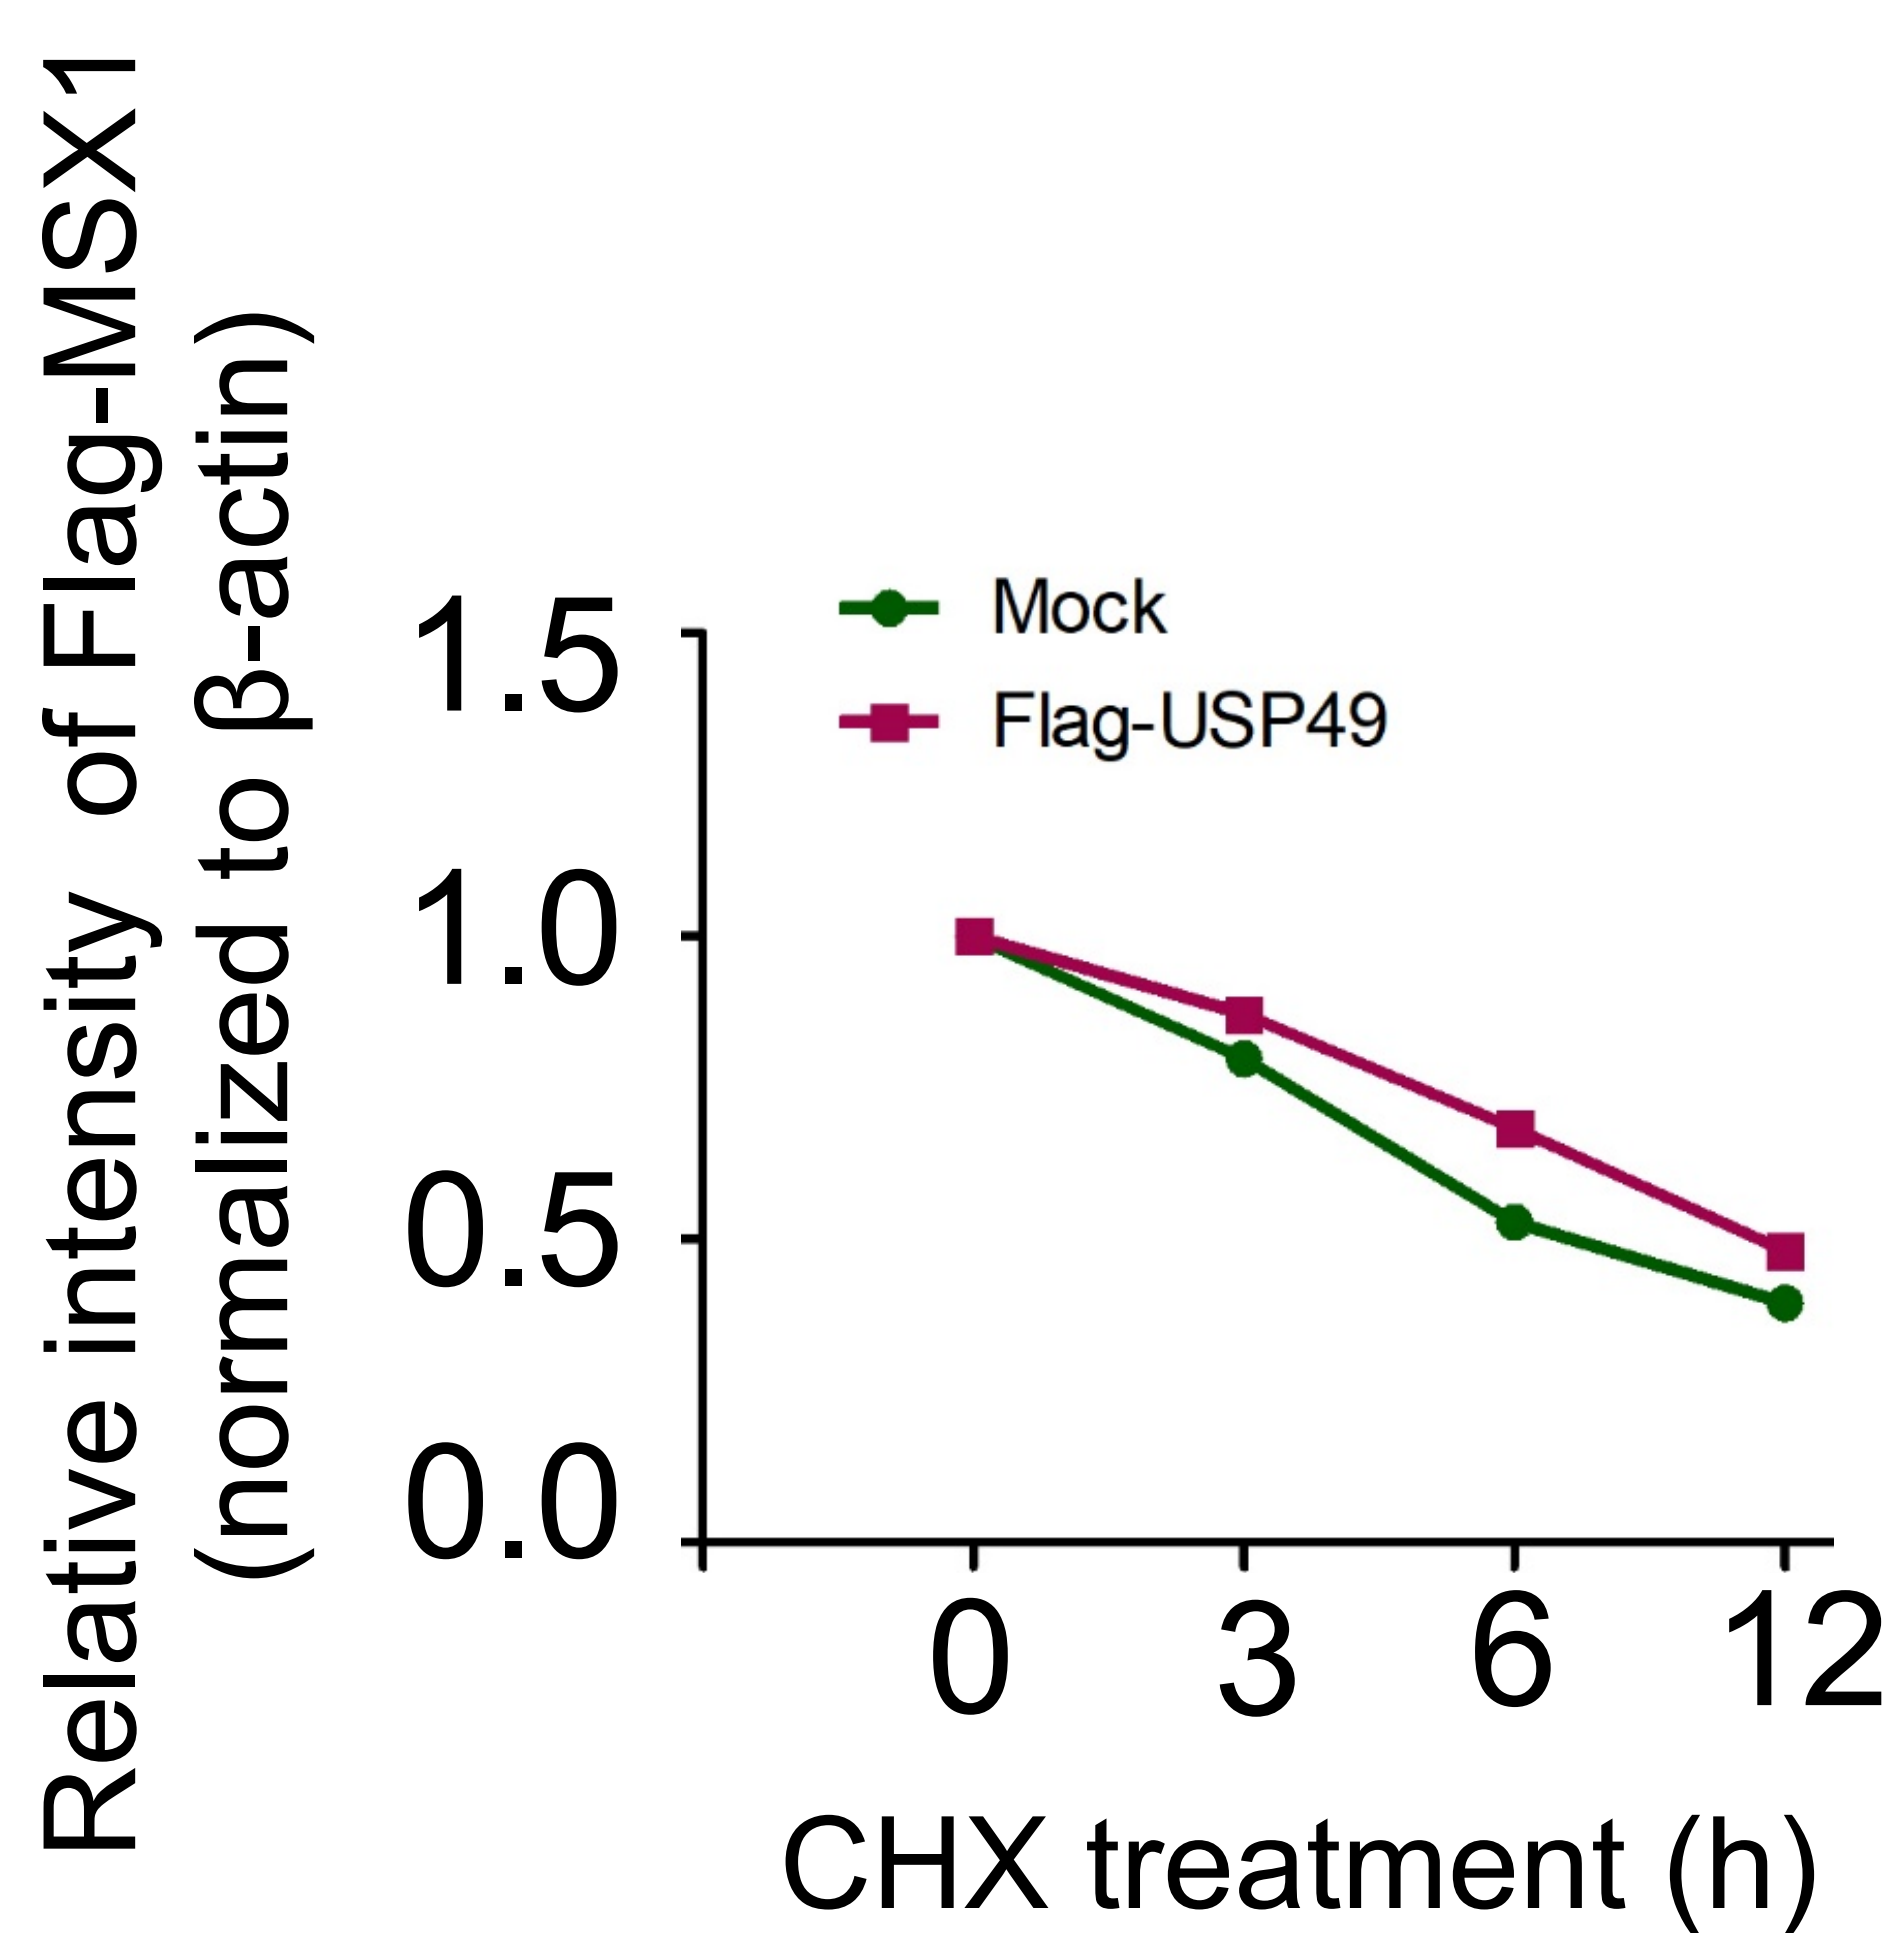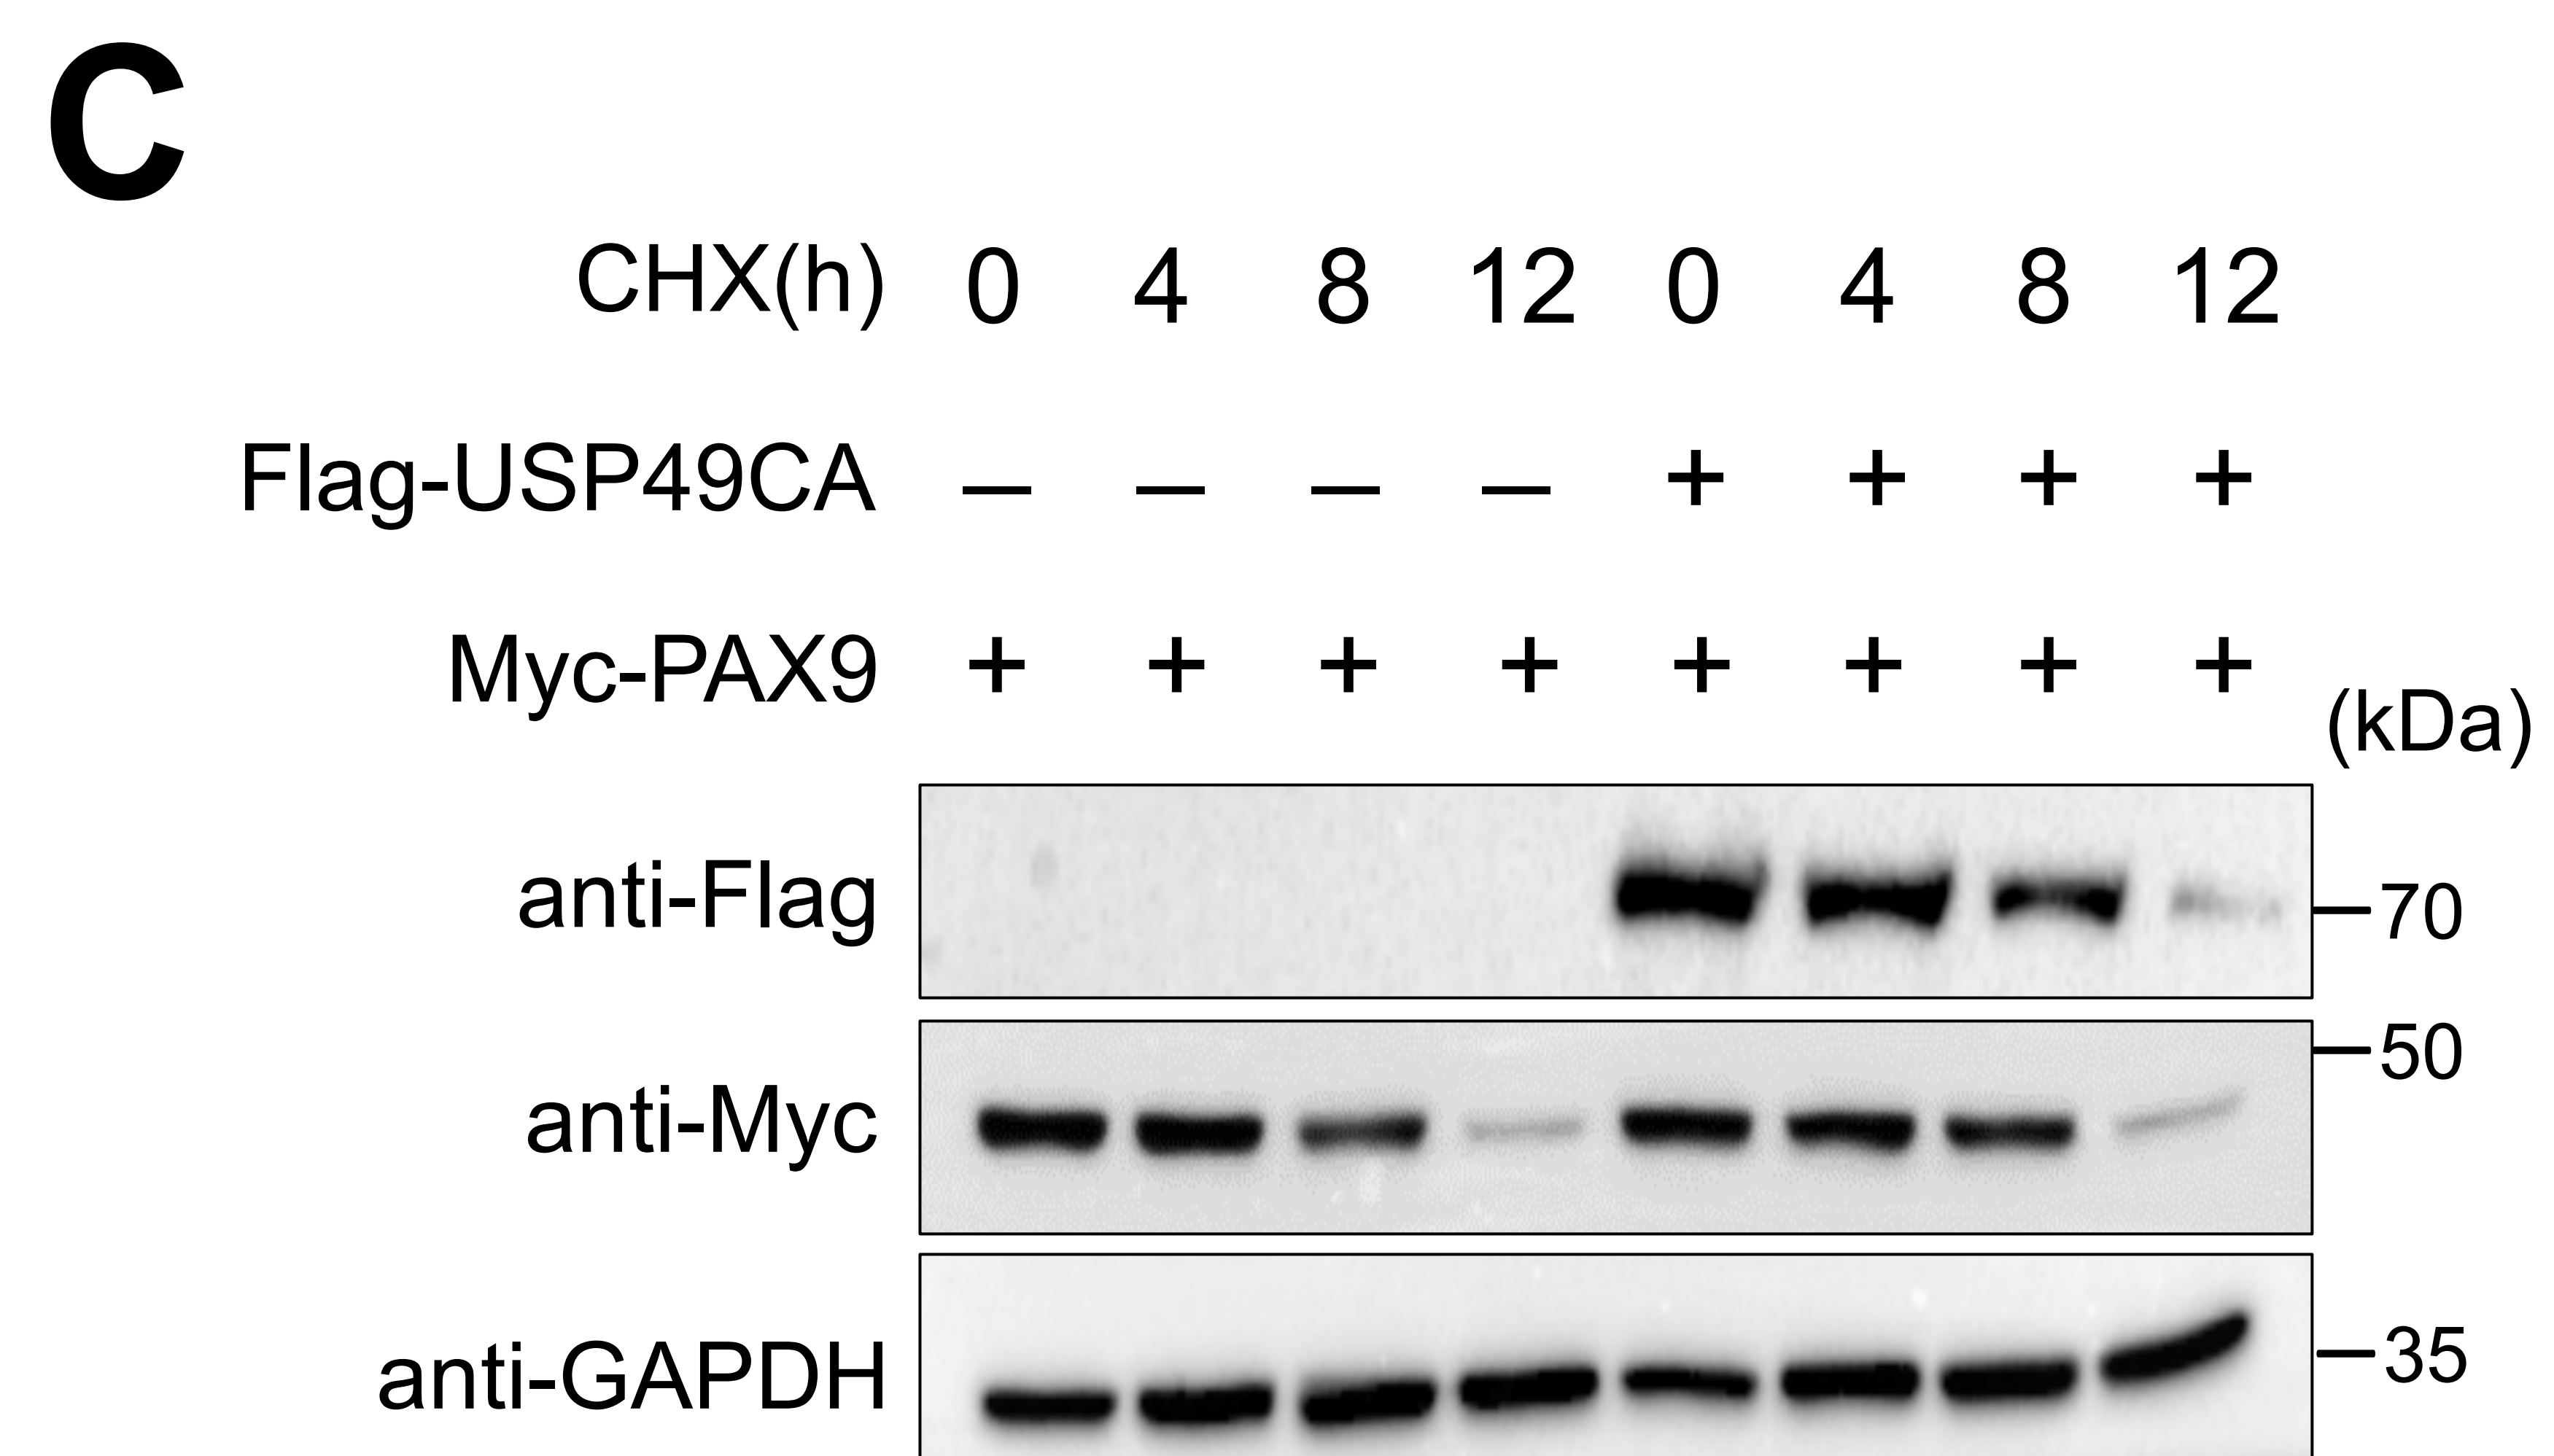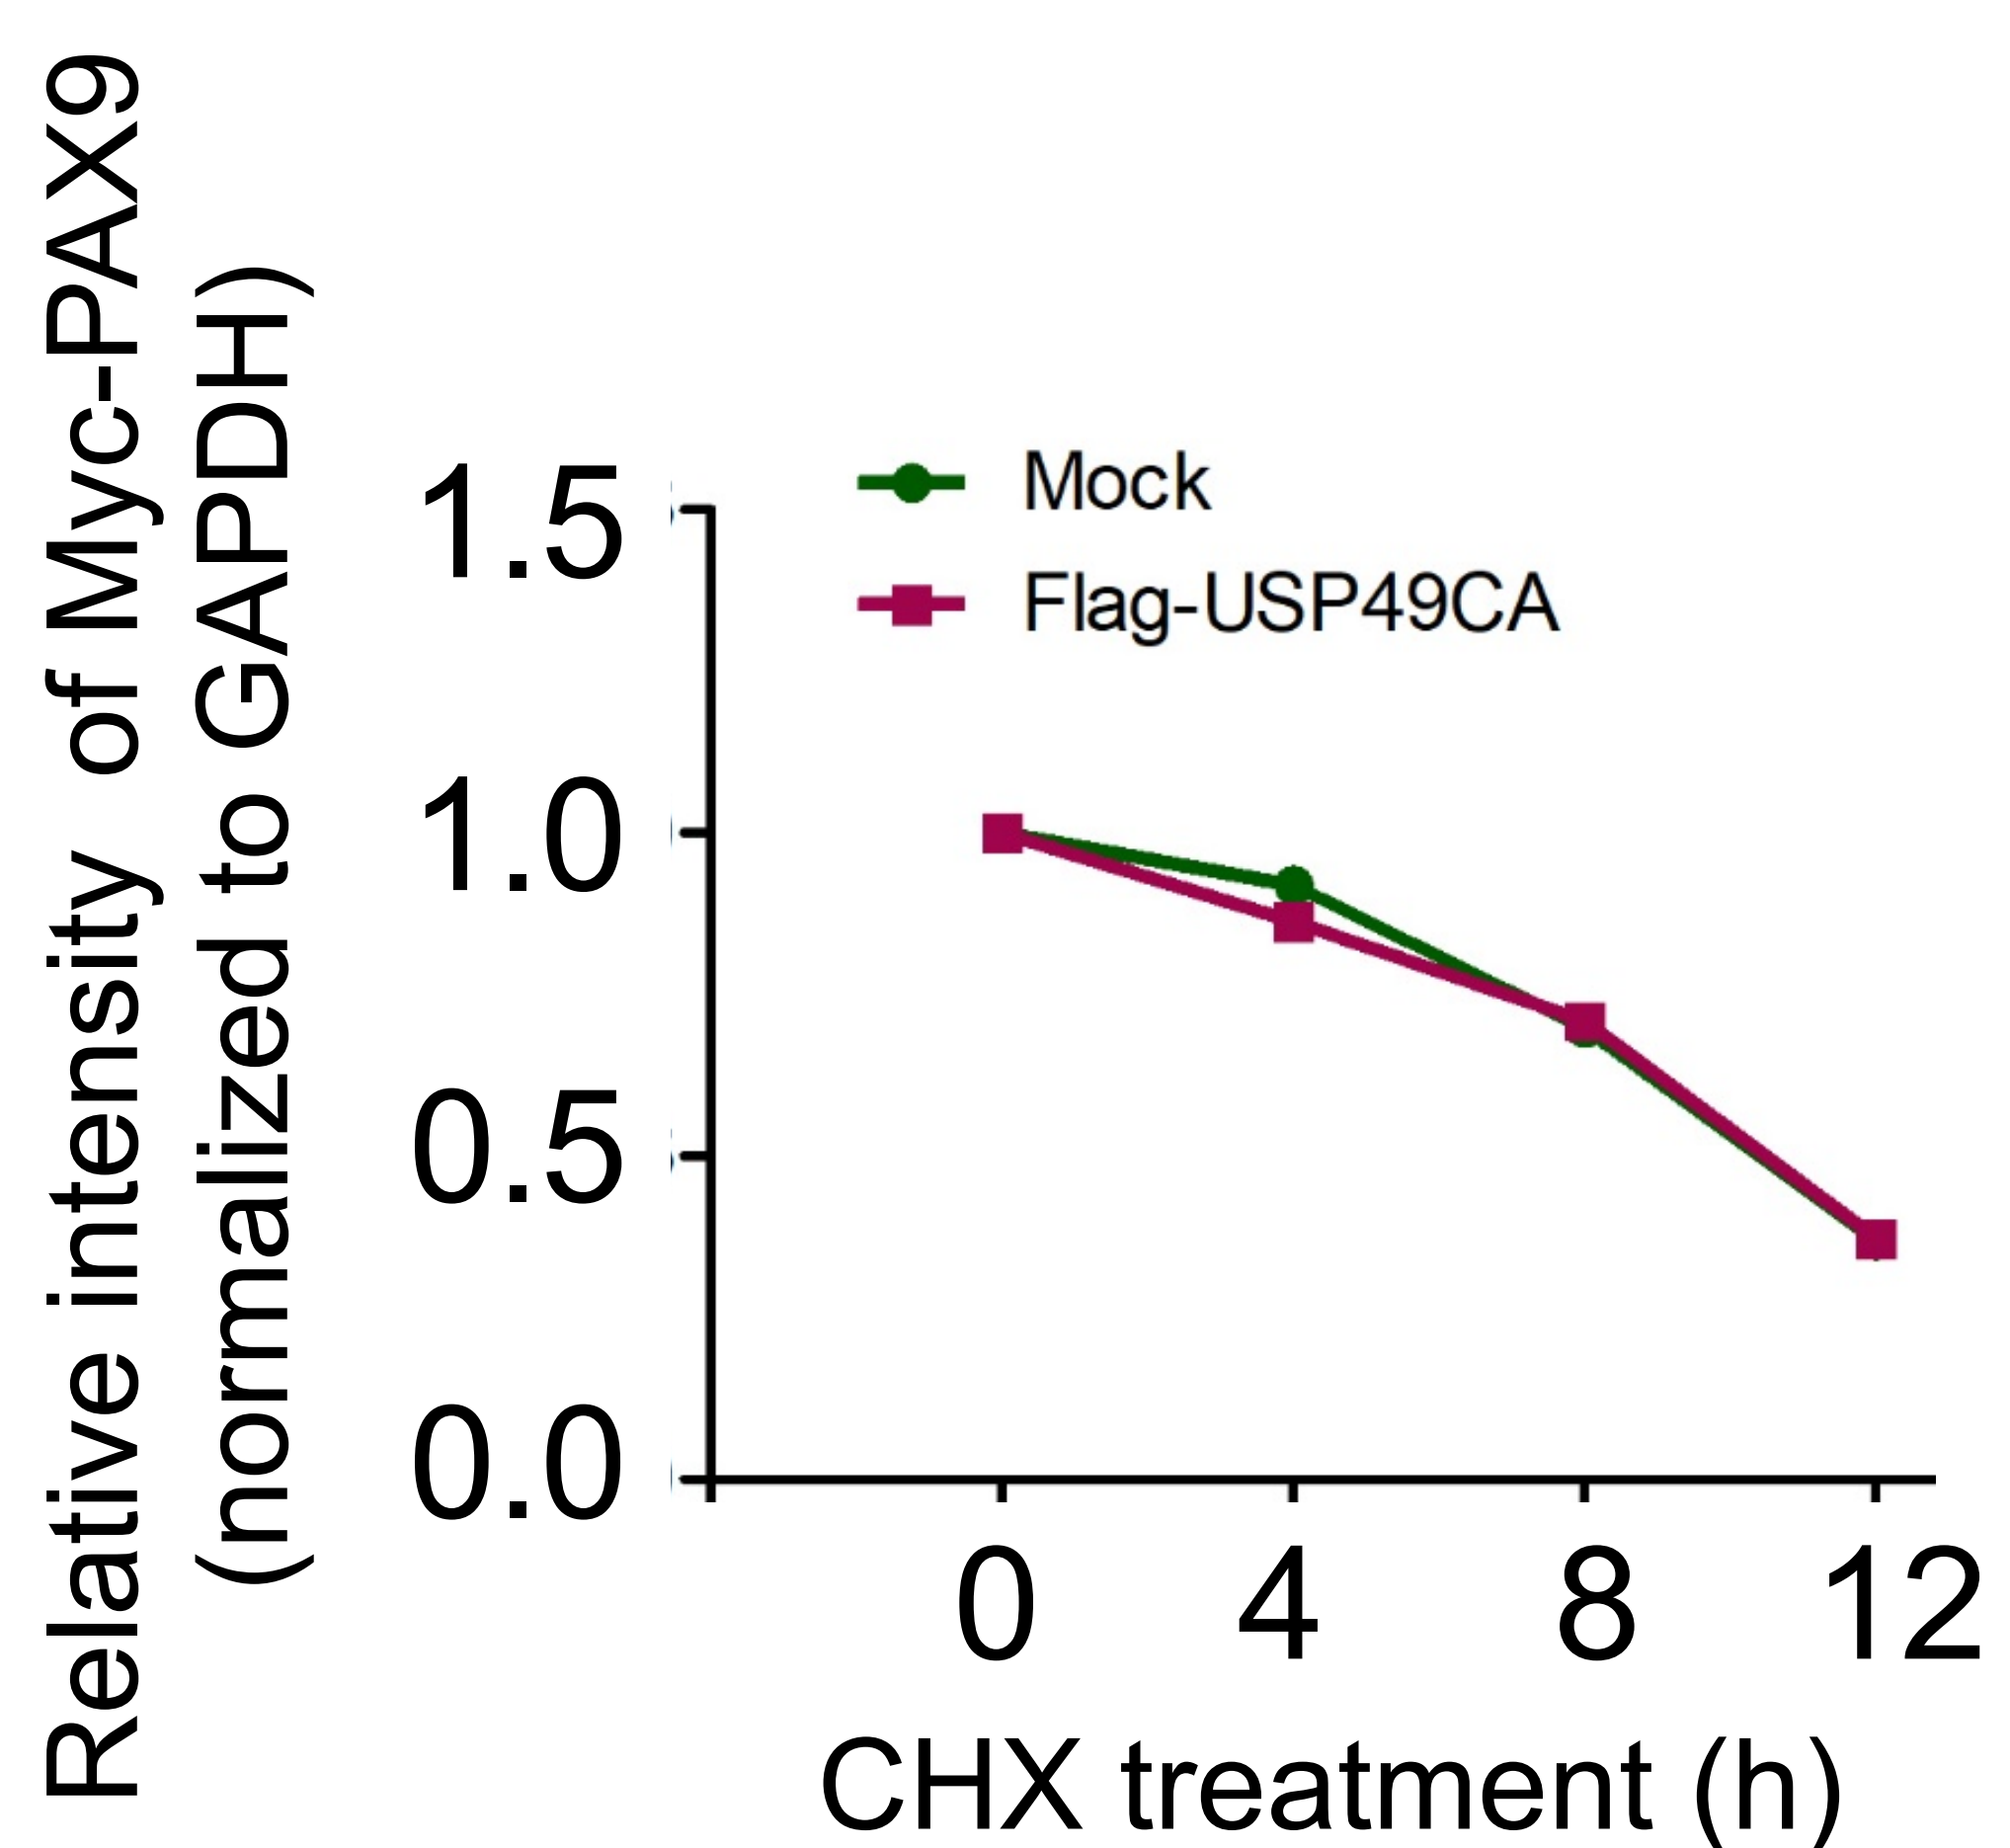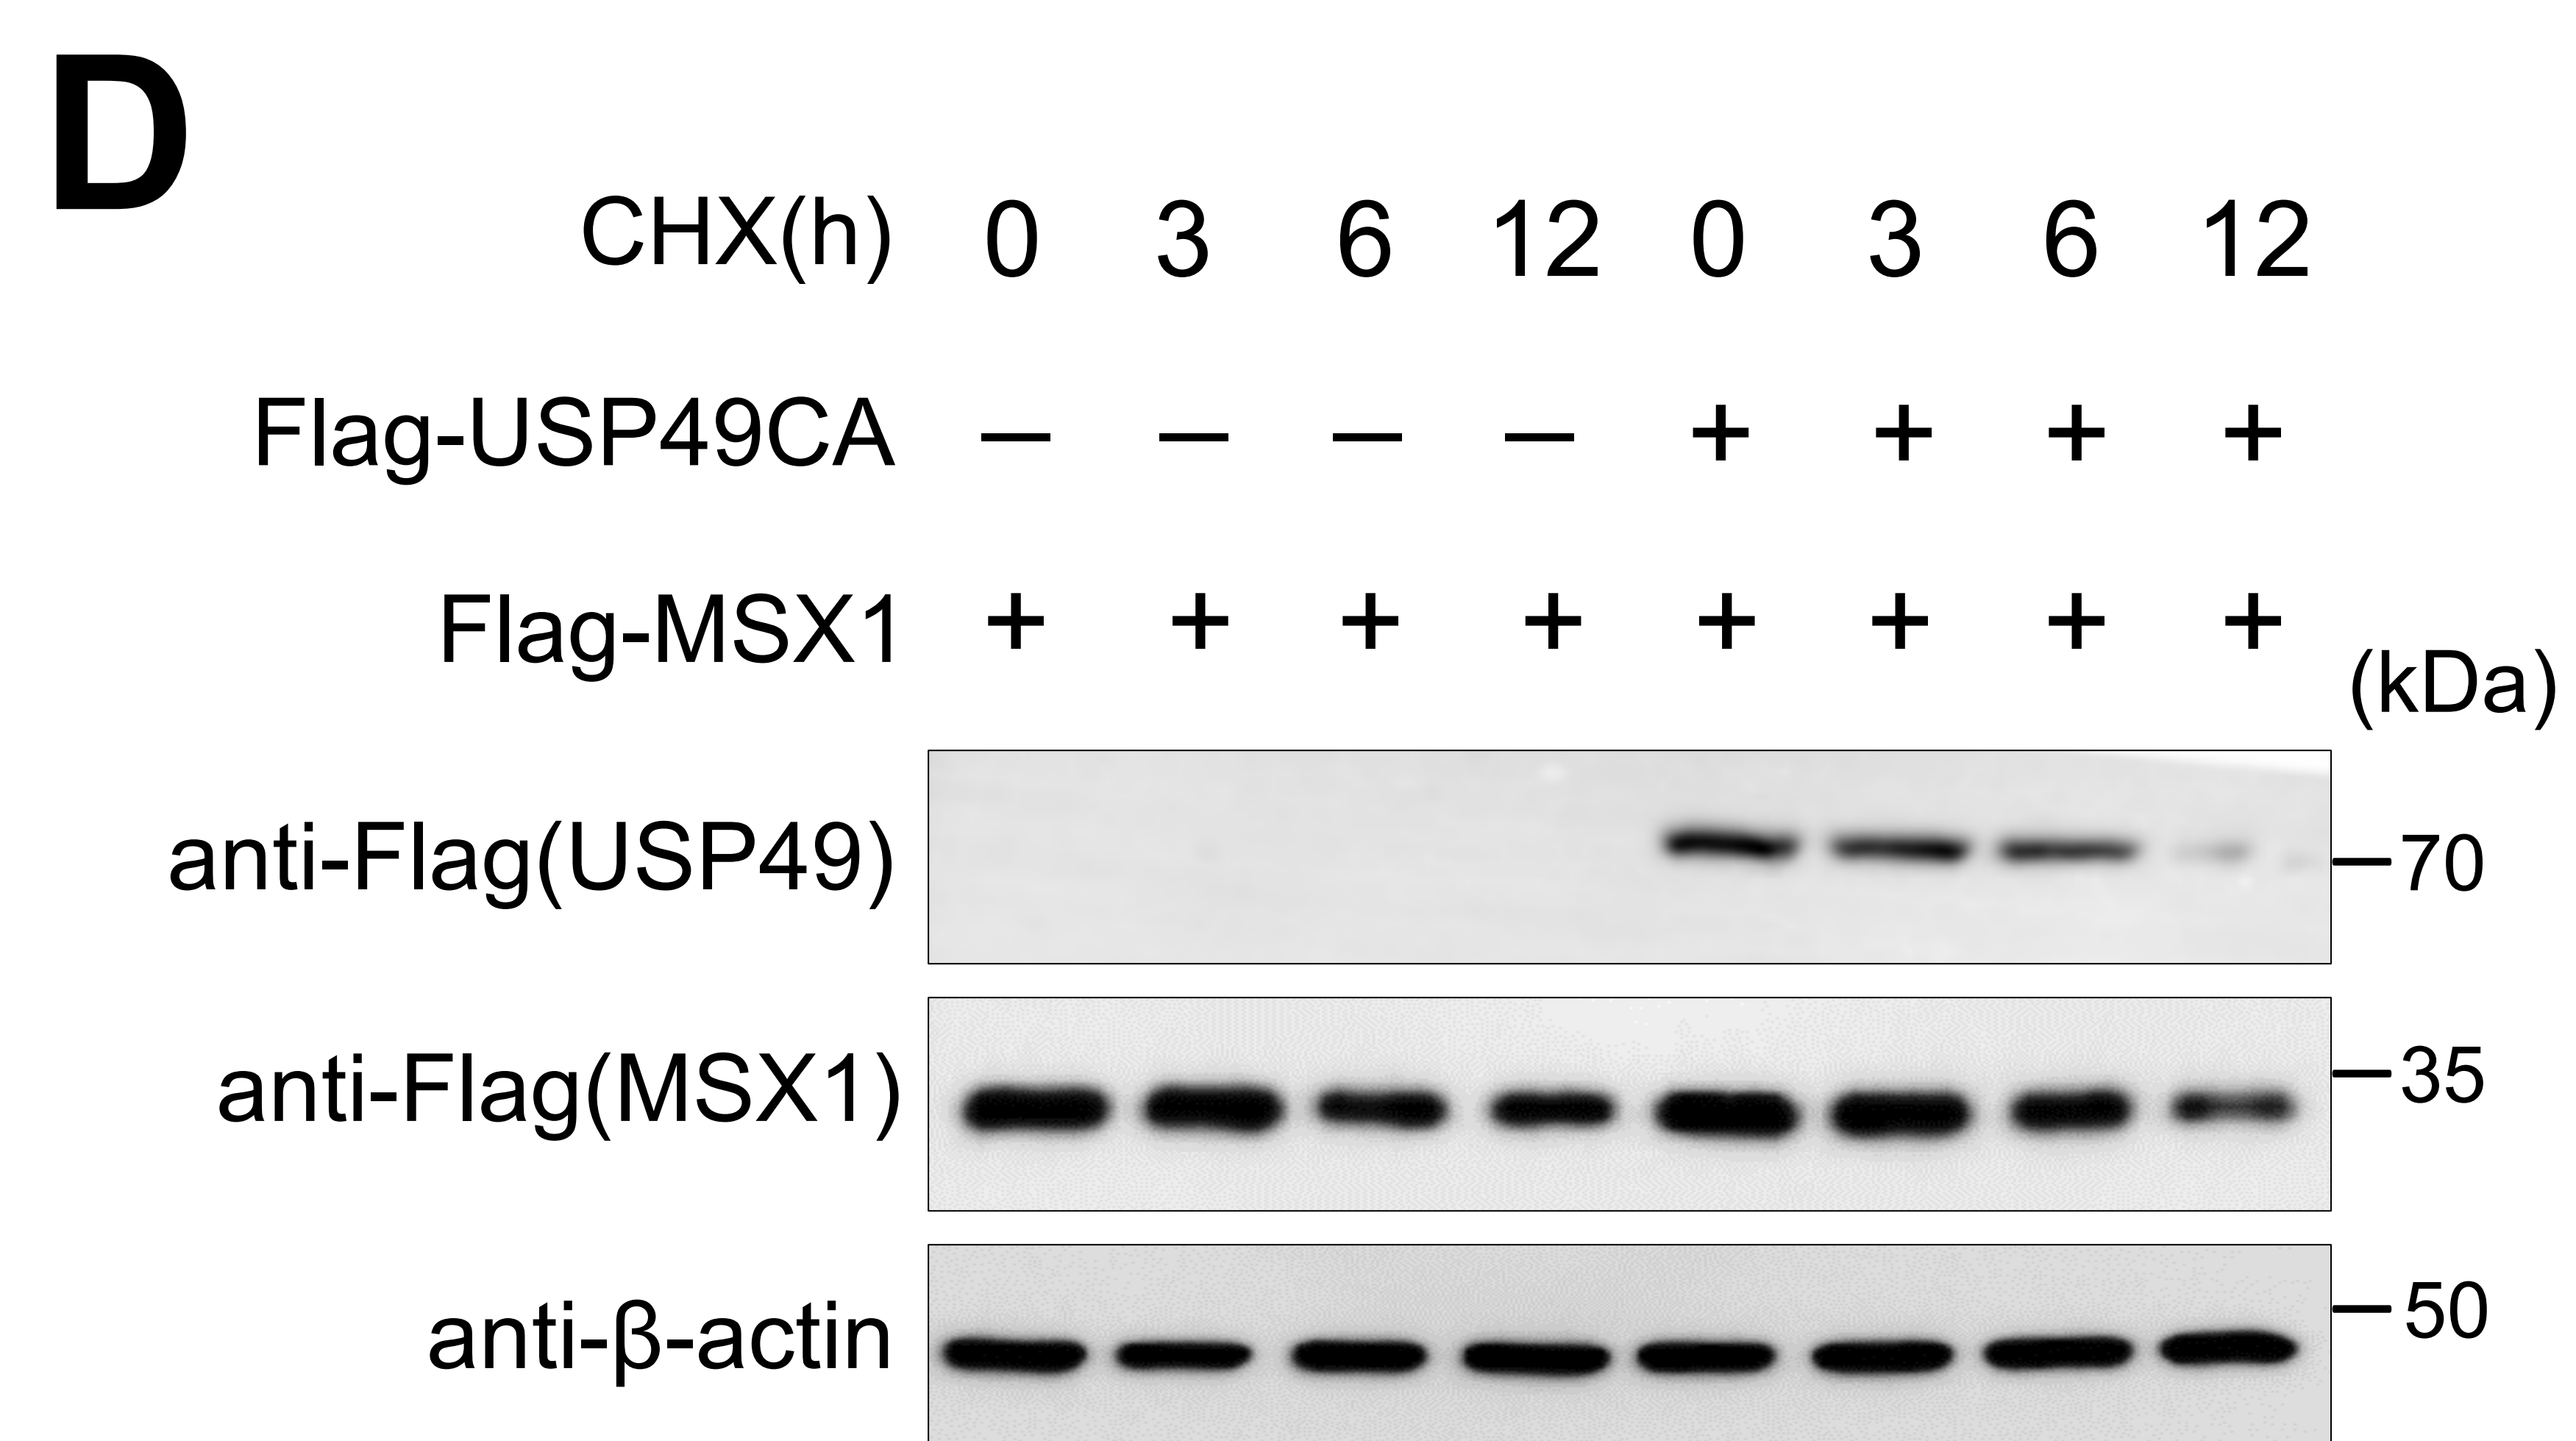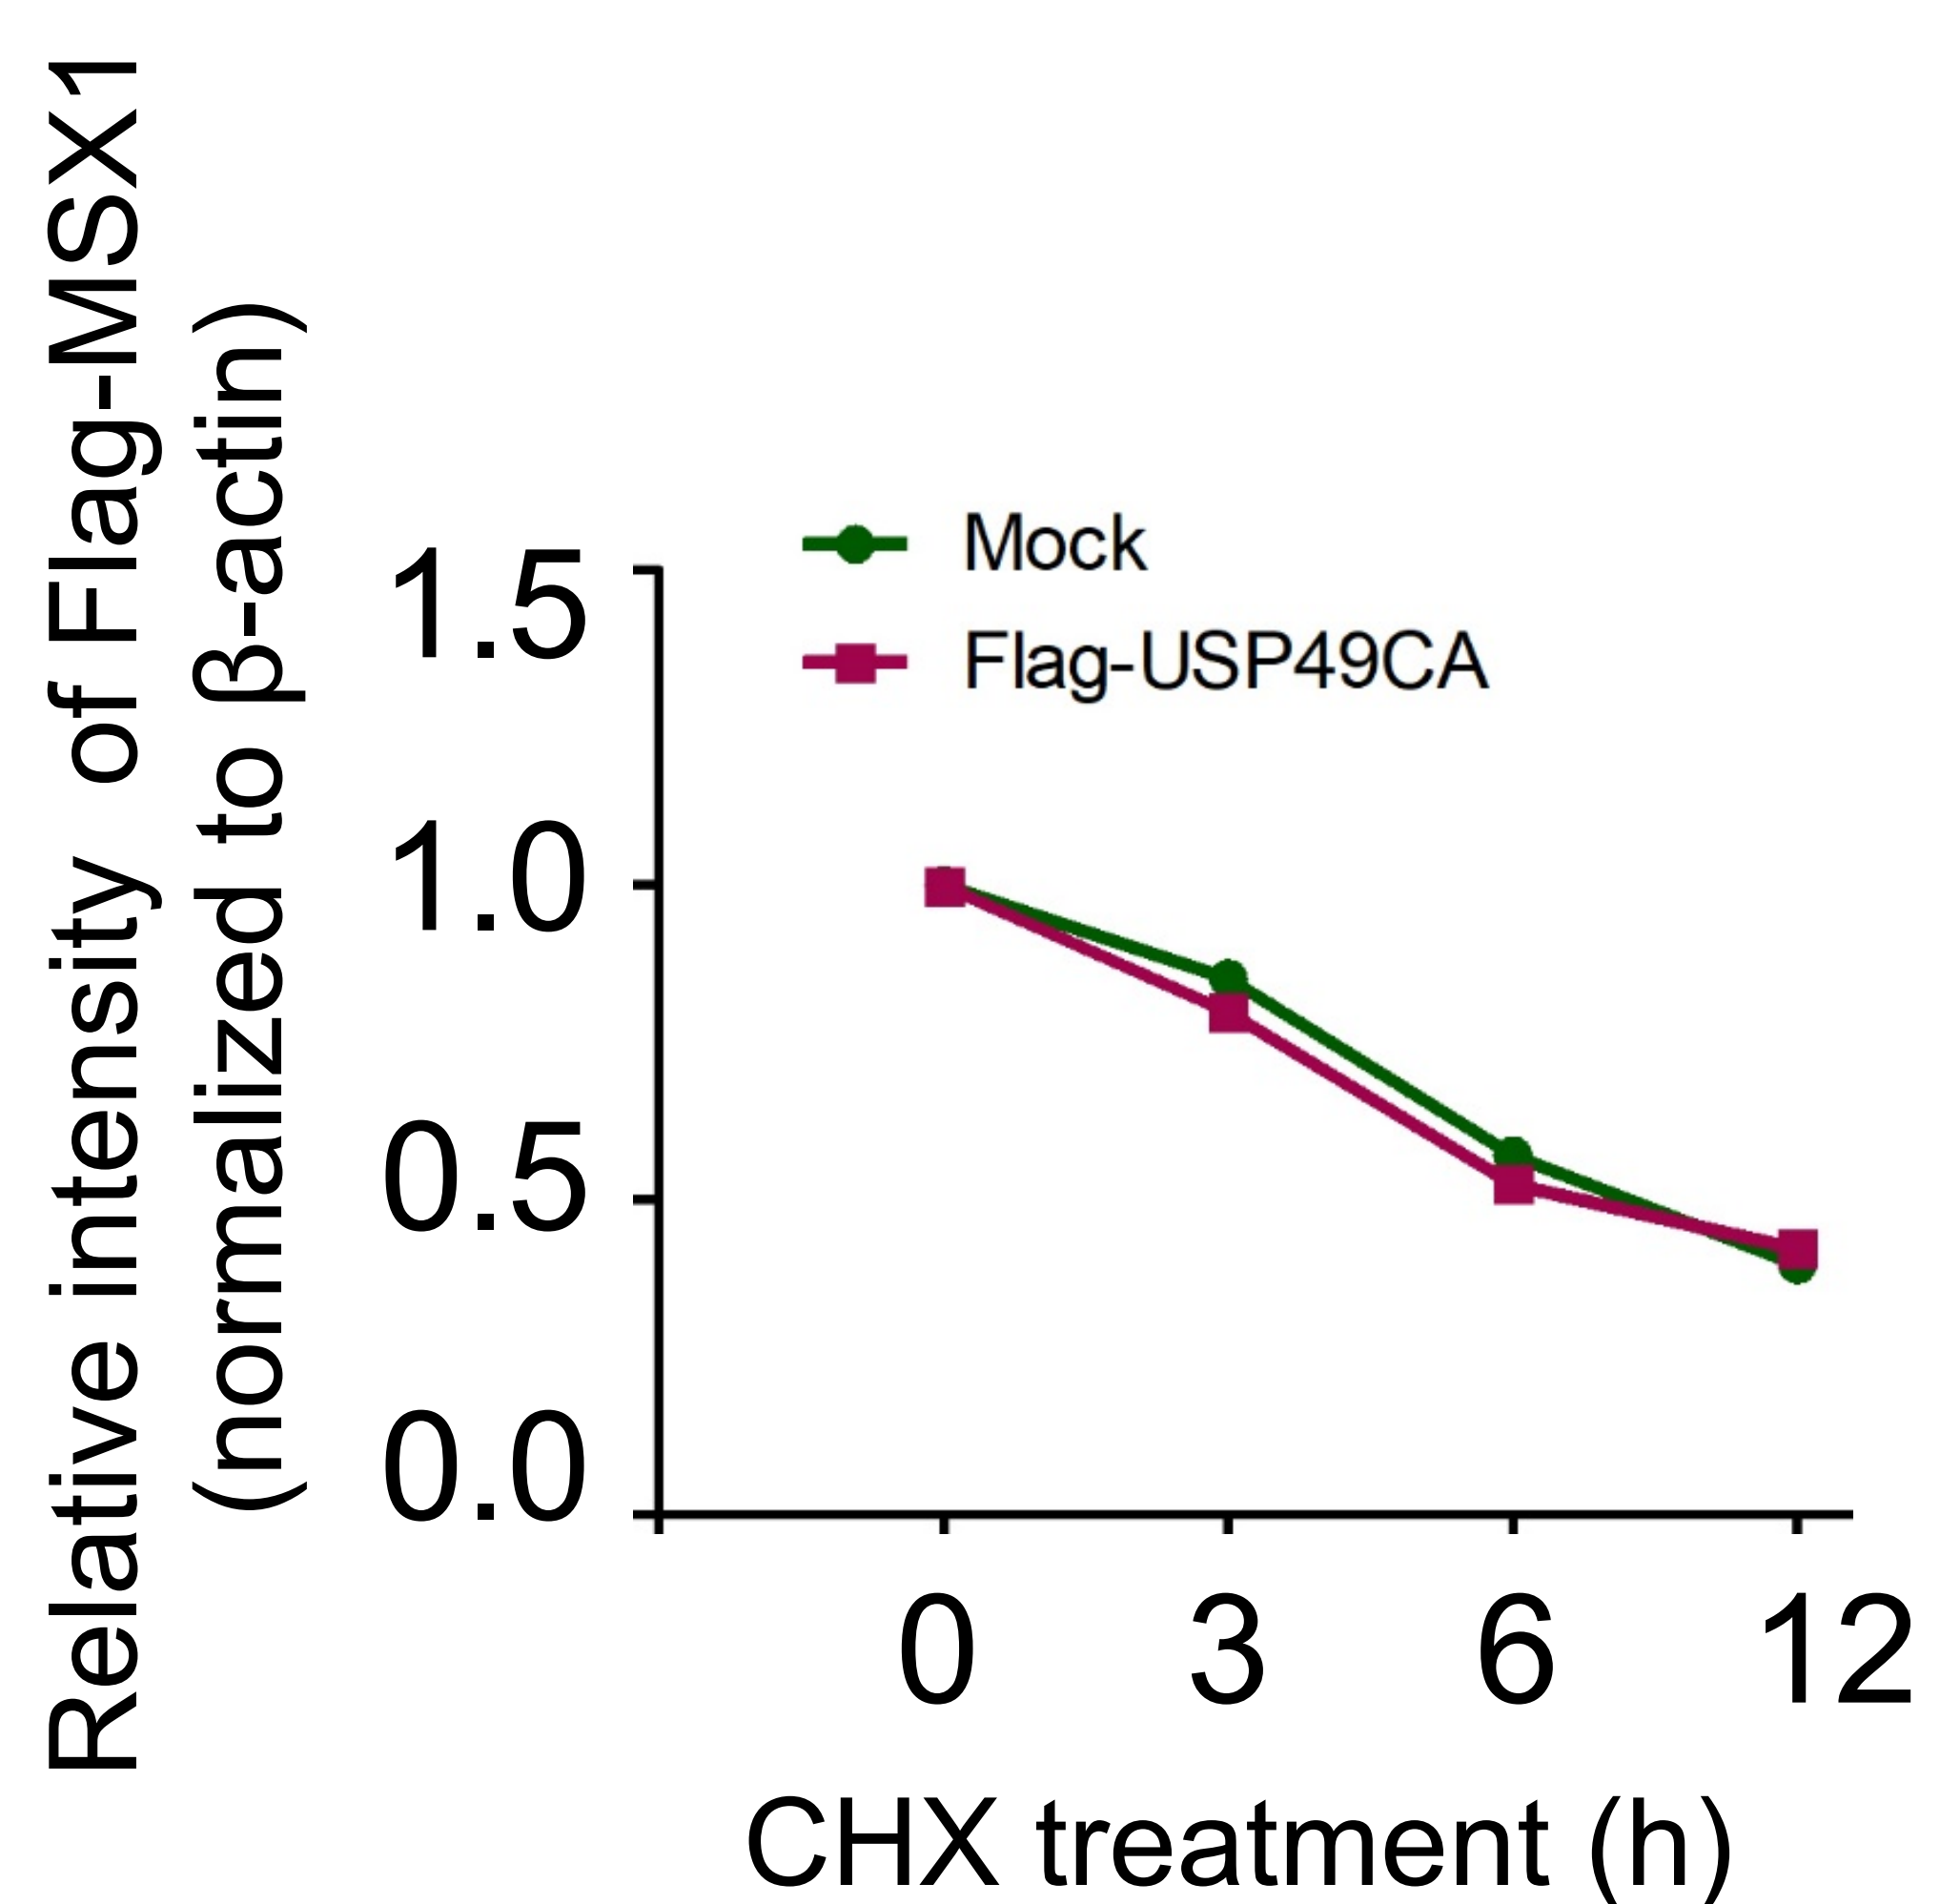

# Supplementary Fig. S7

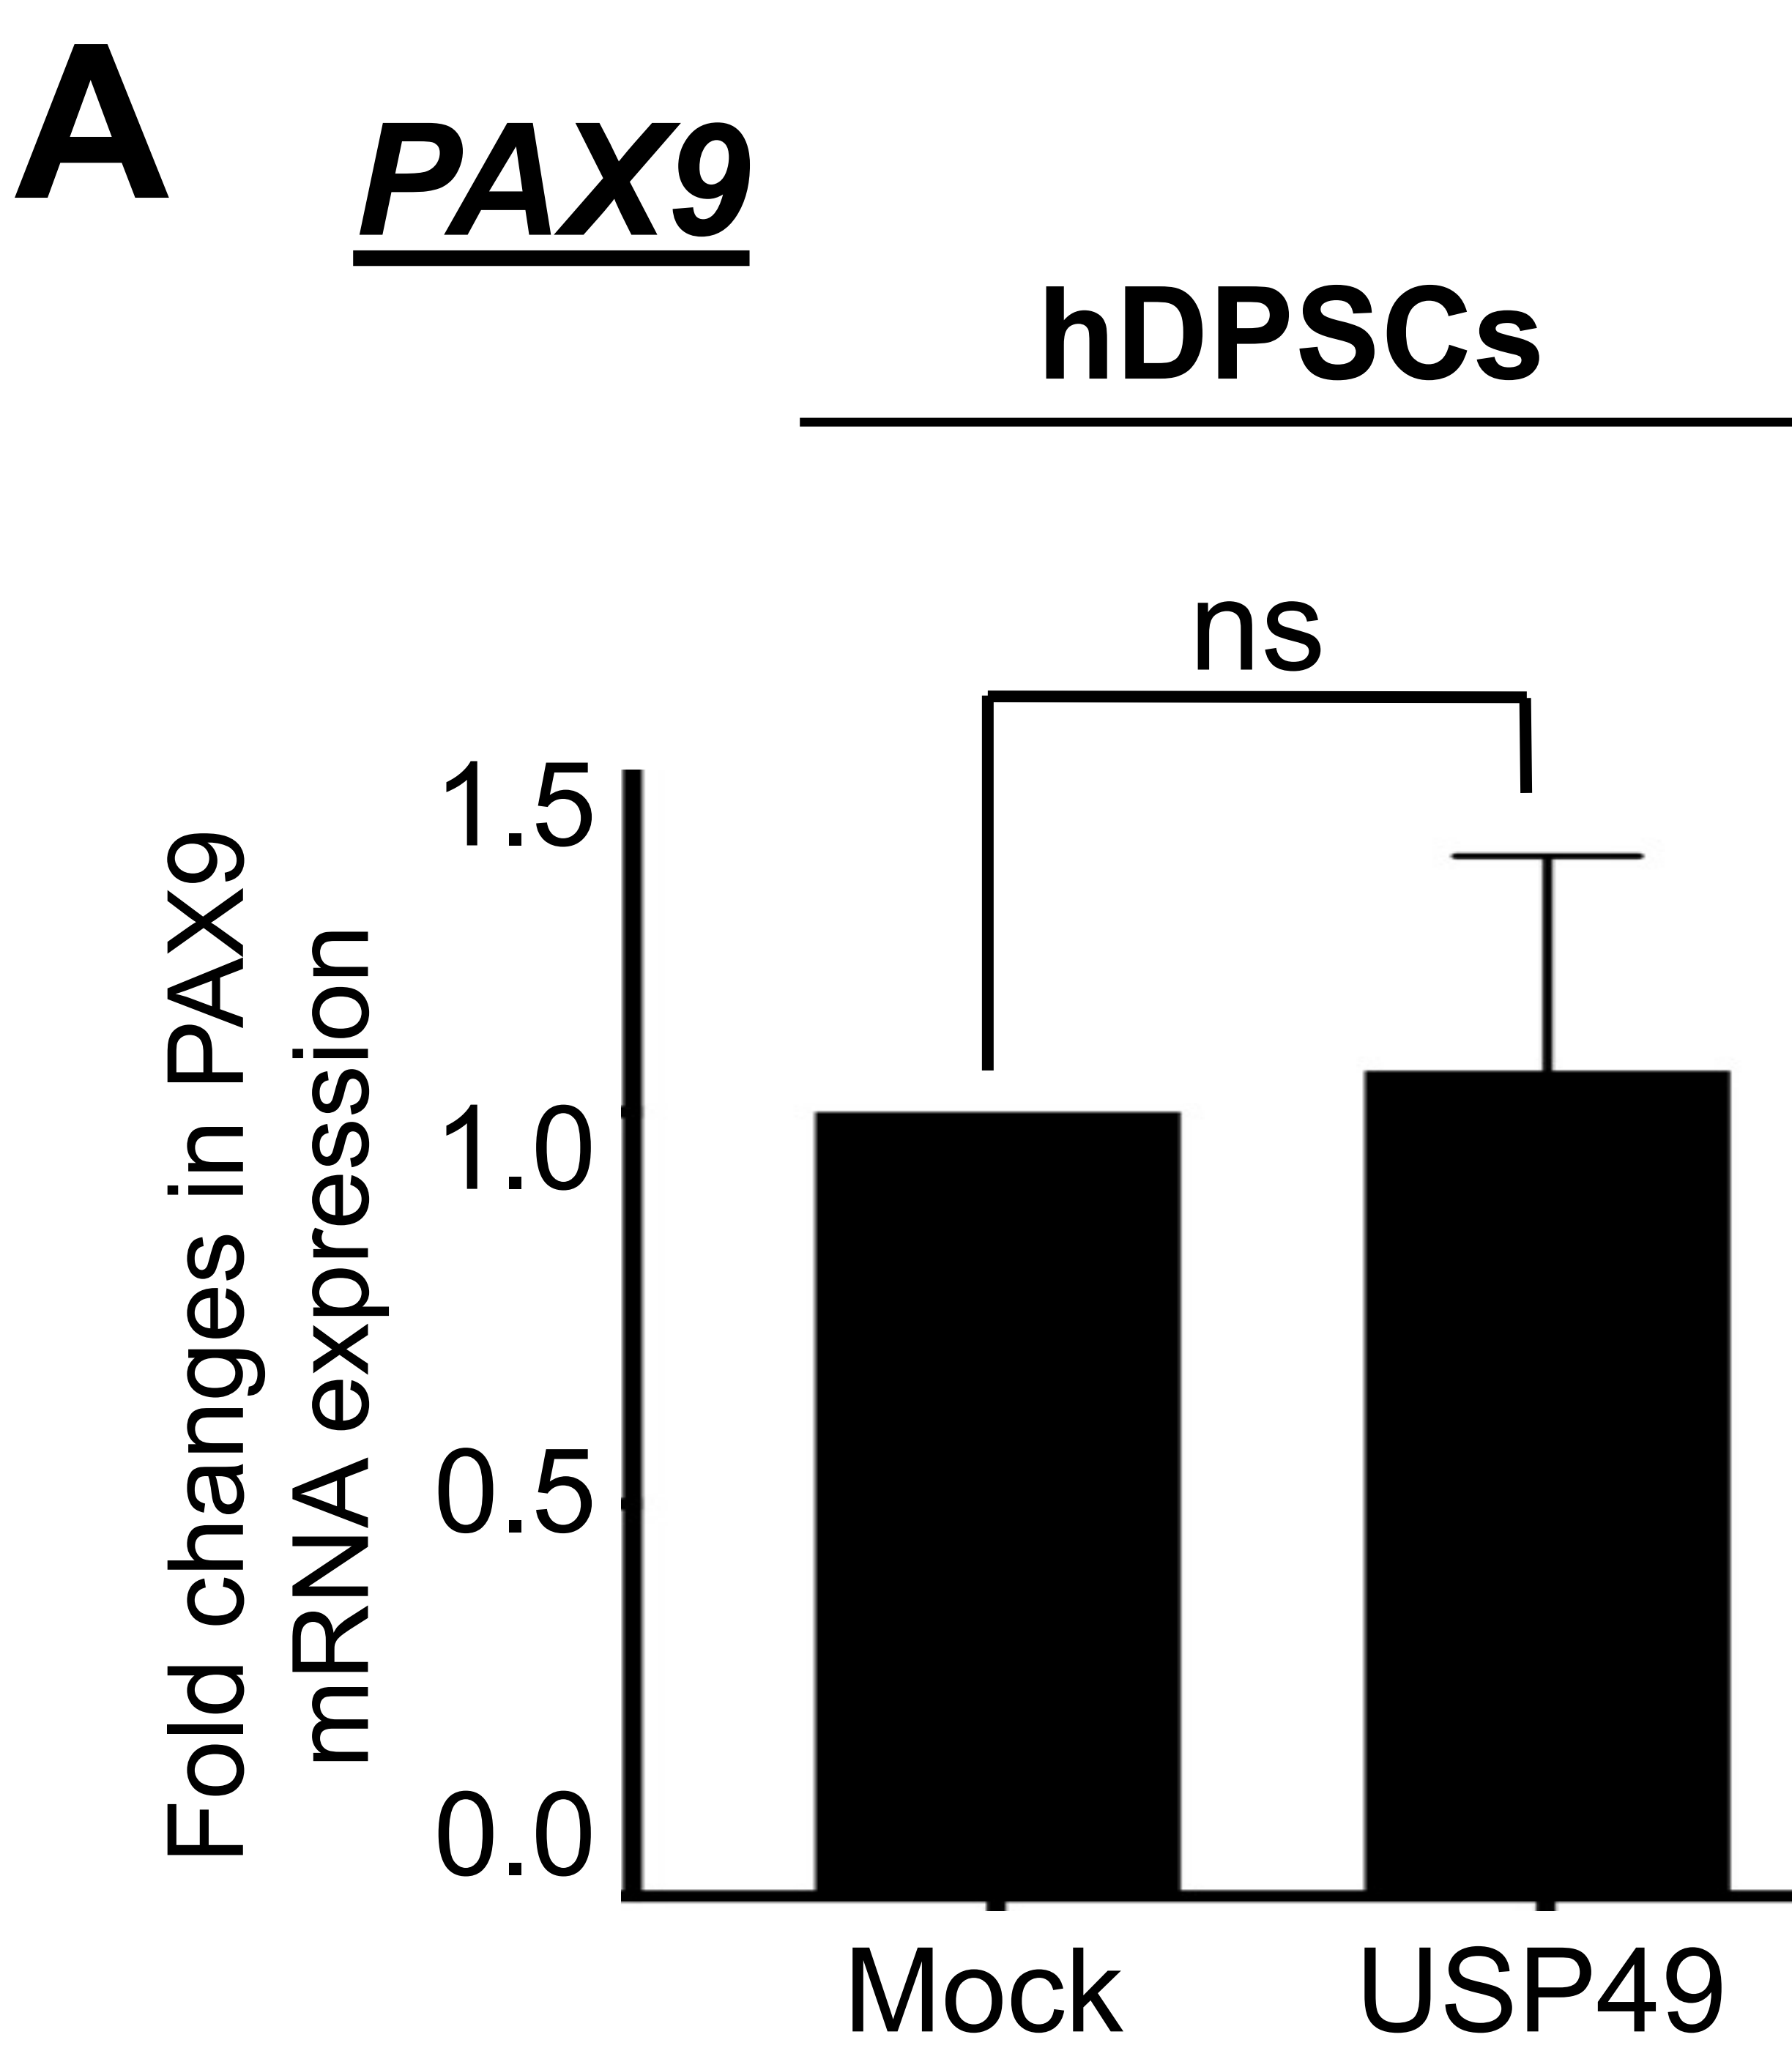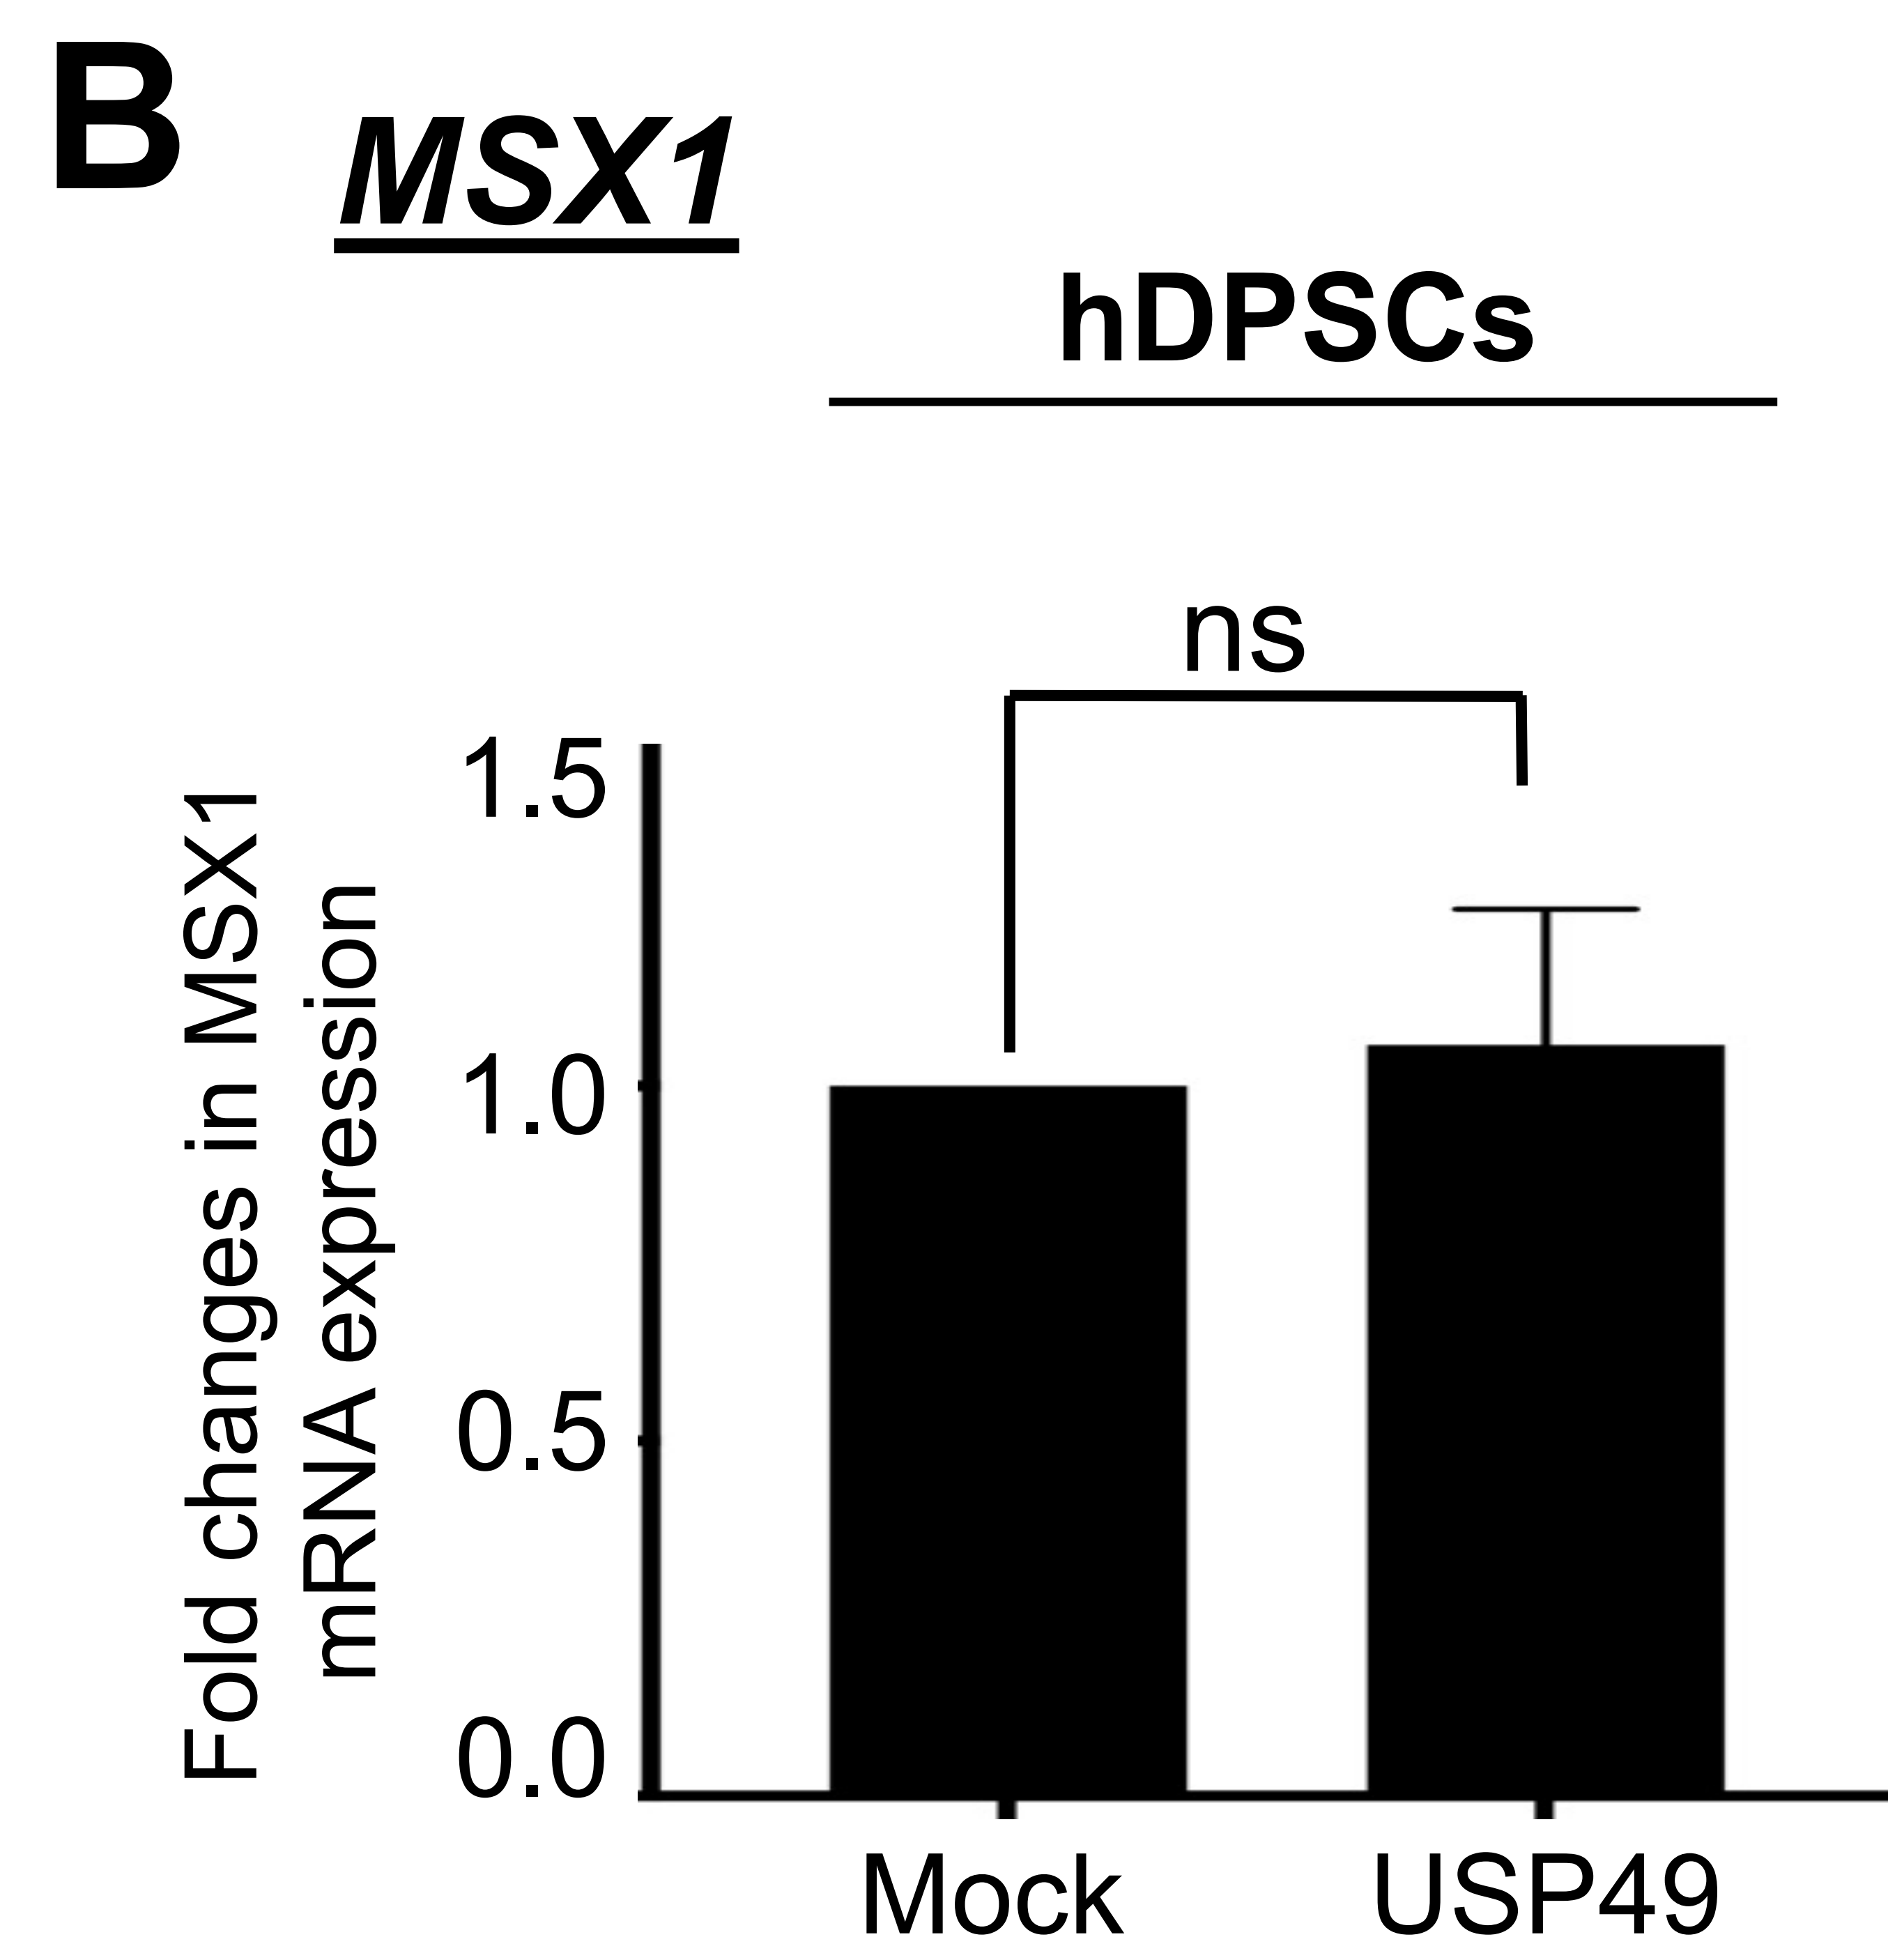

# Supplementary Fig. S8

## A

### PAX9

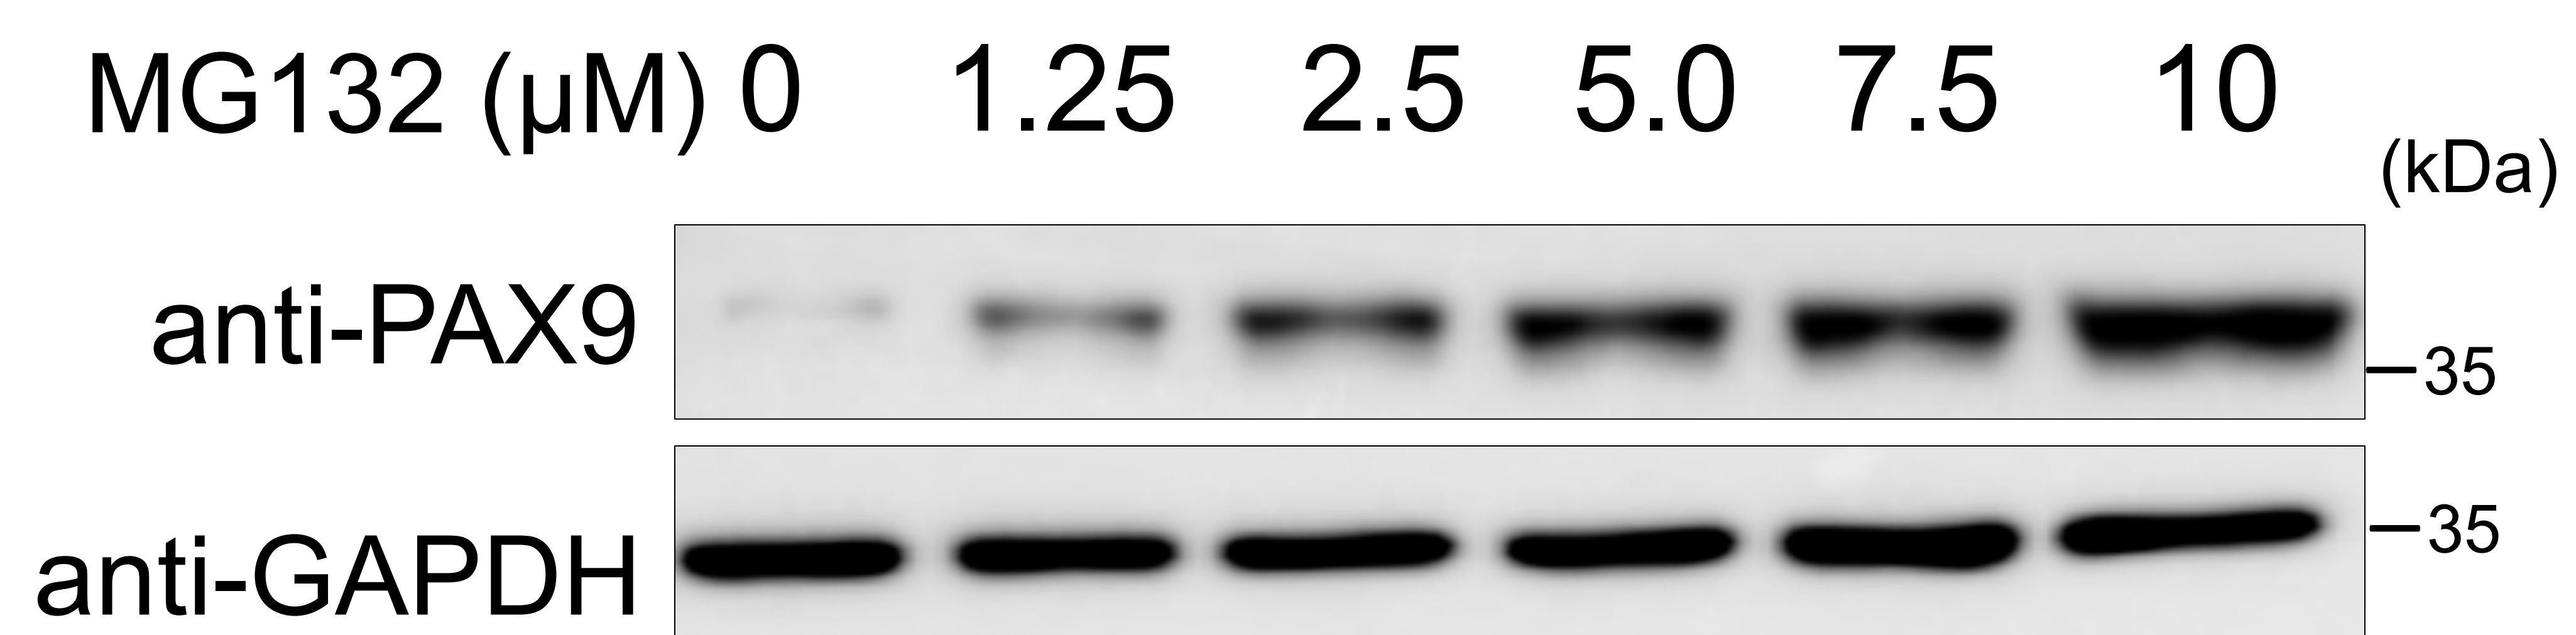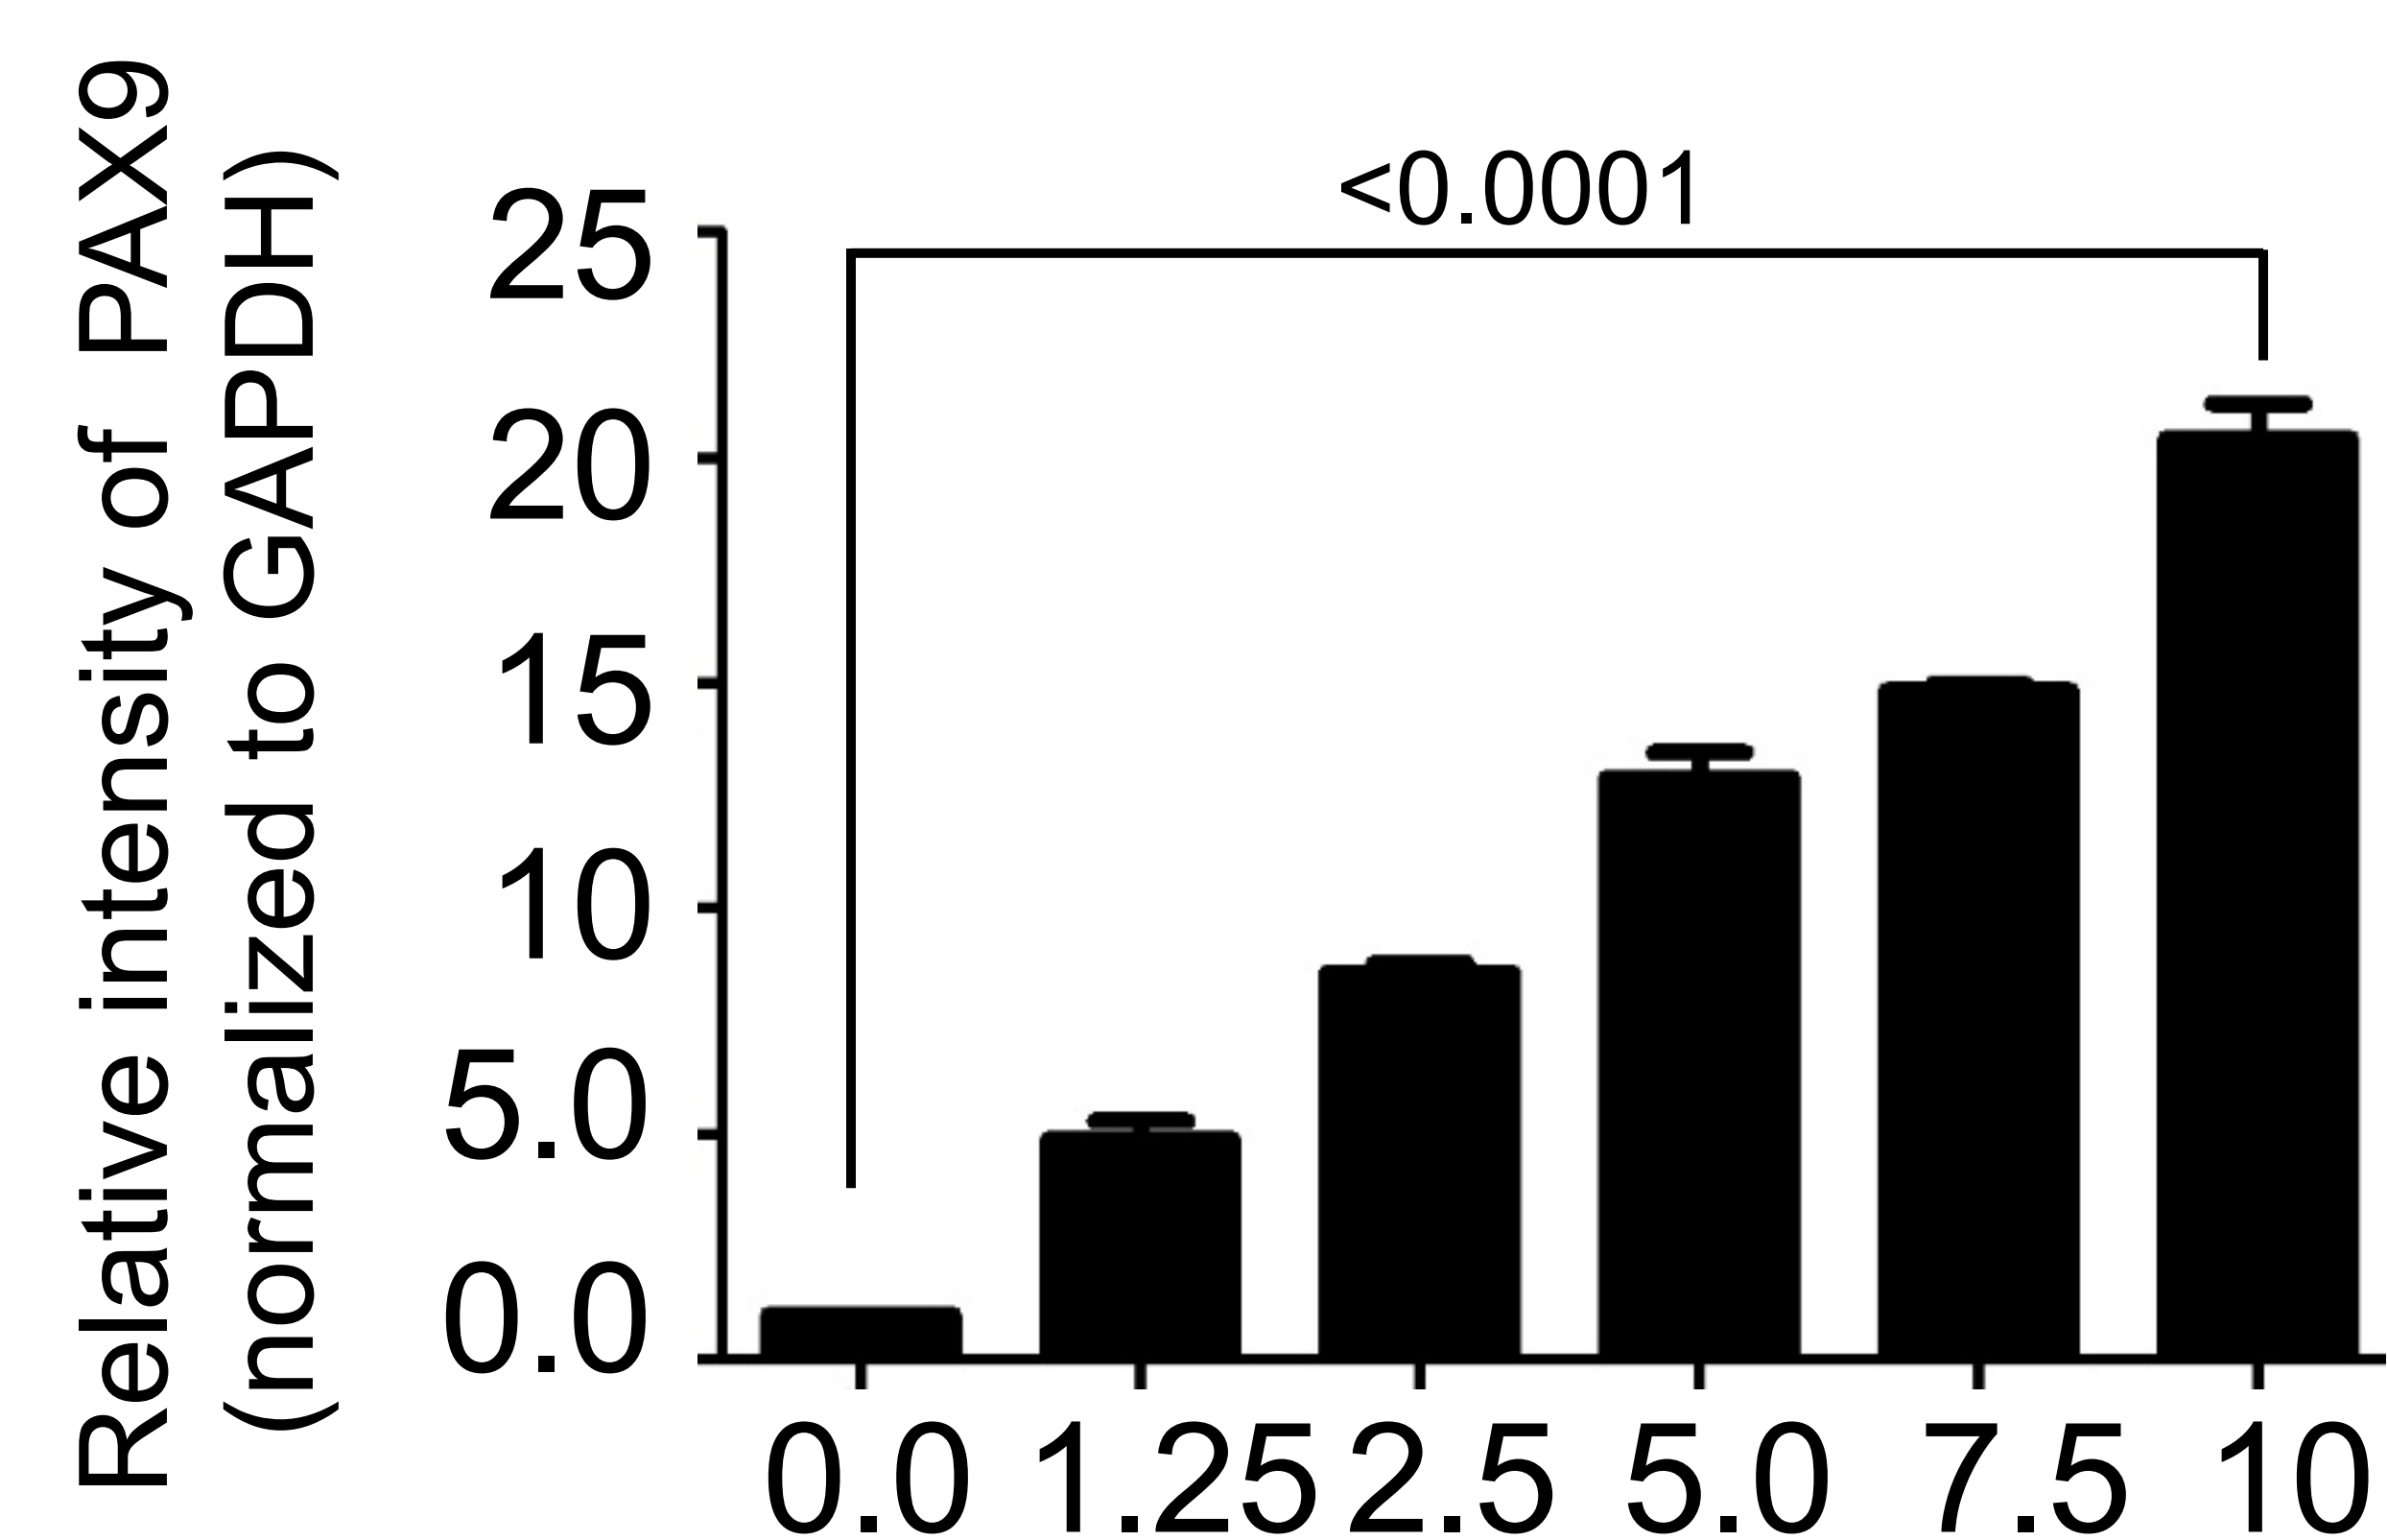

## B

### MSX1

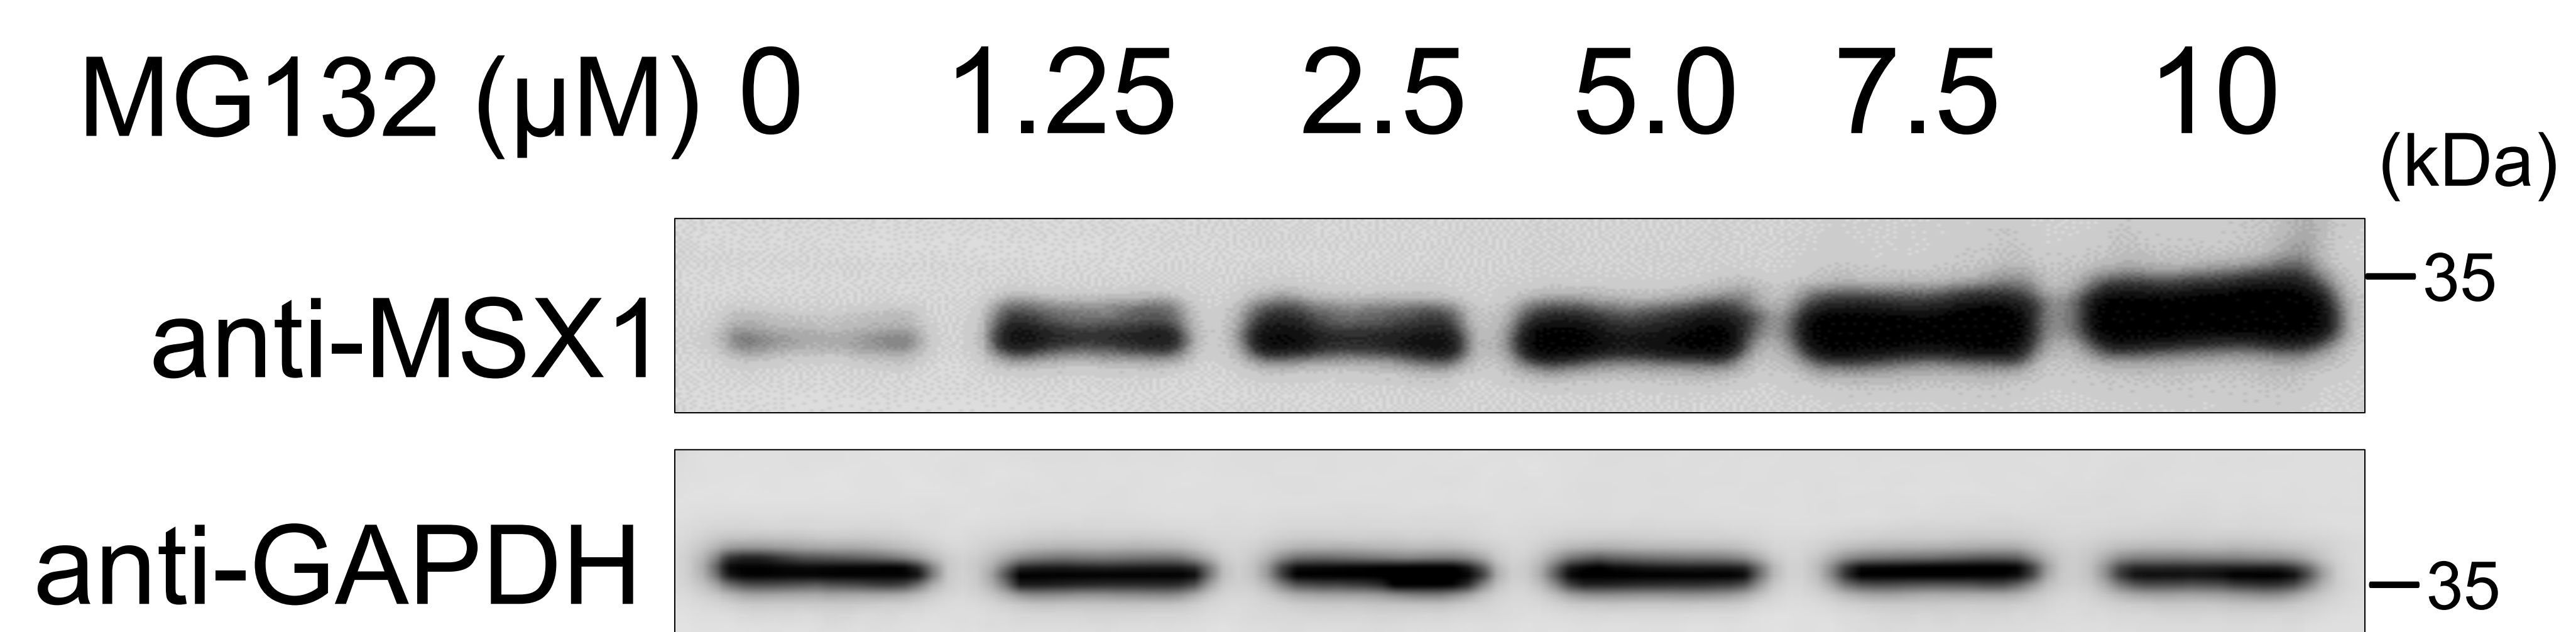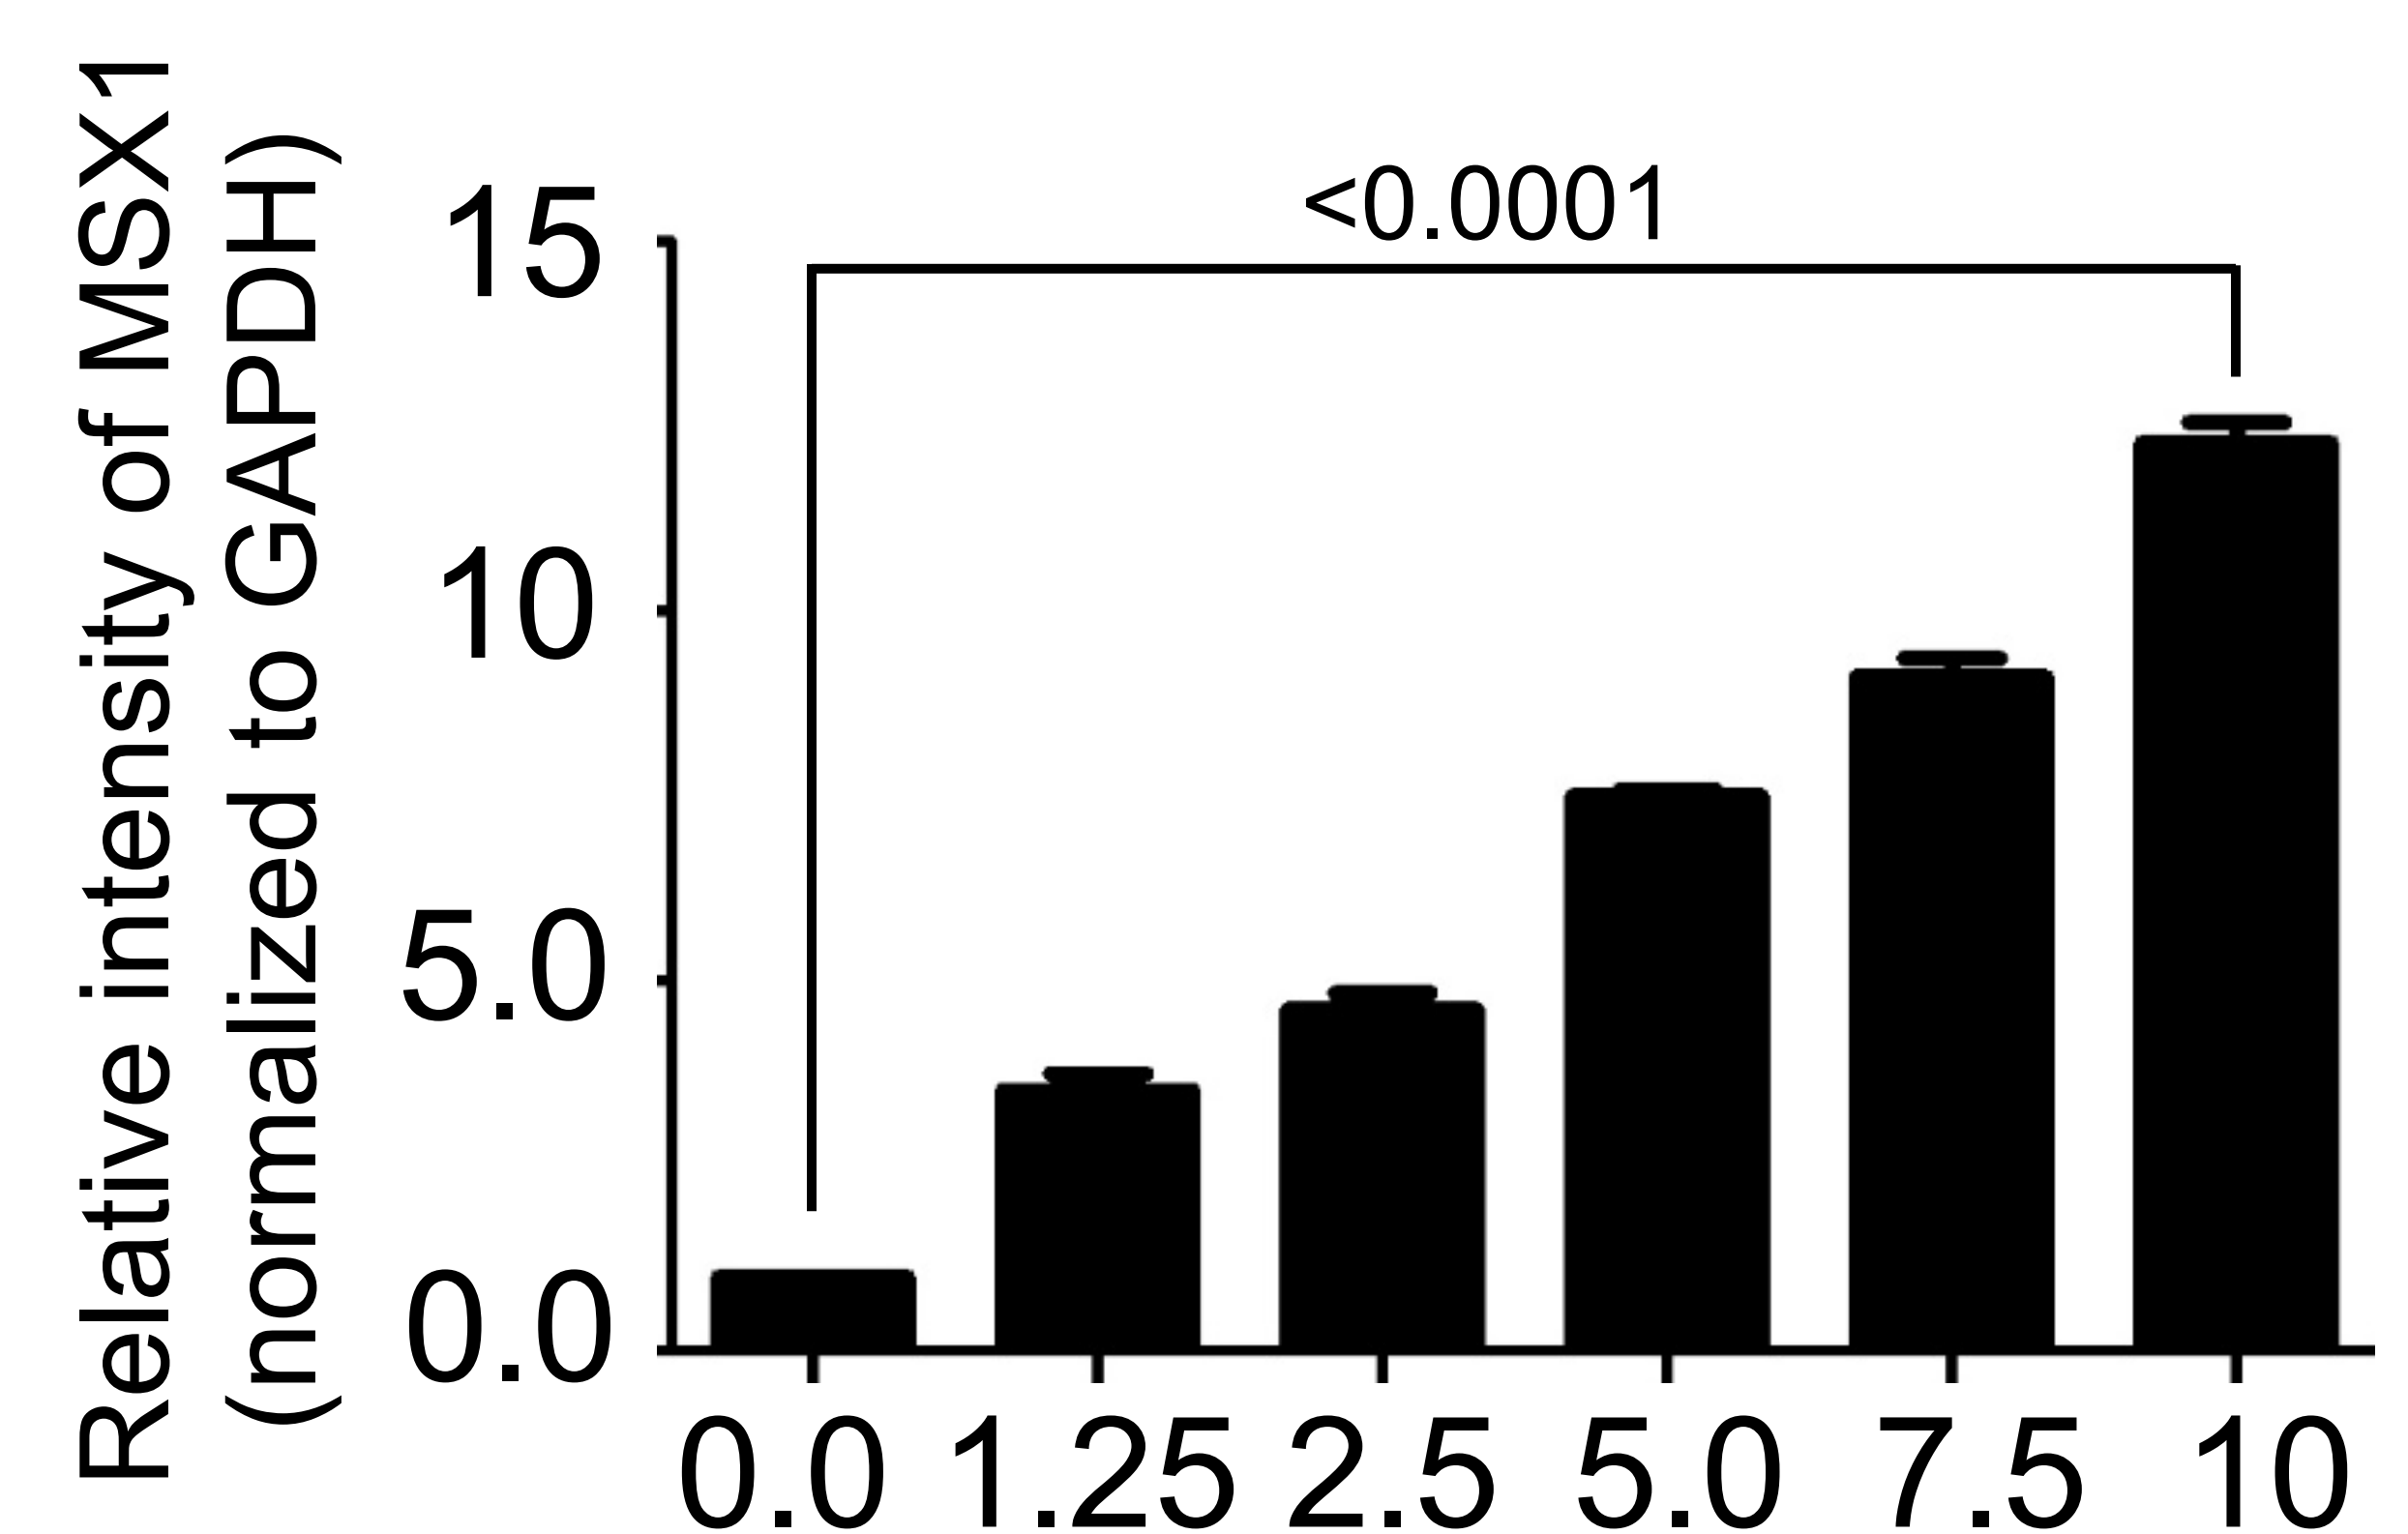

## C

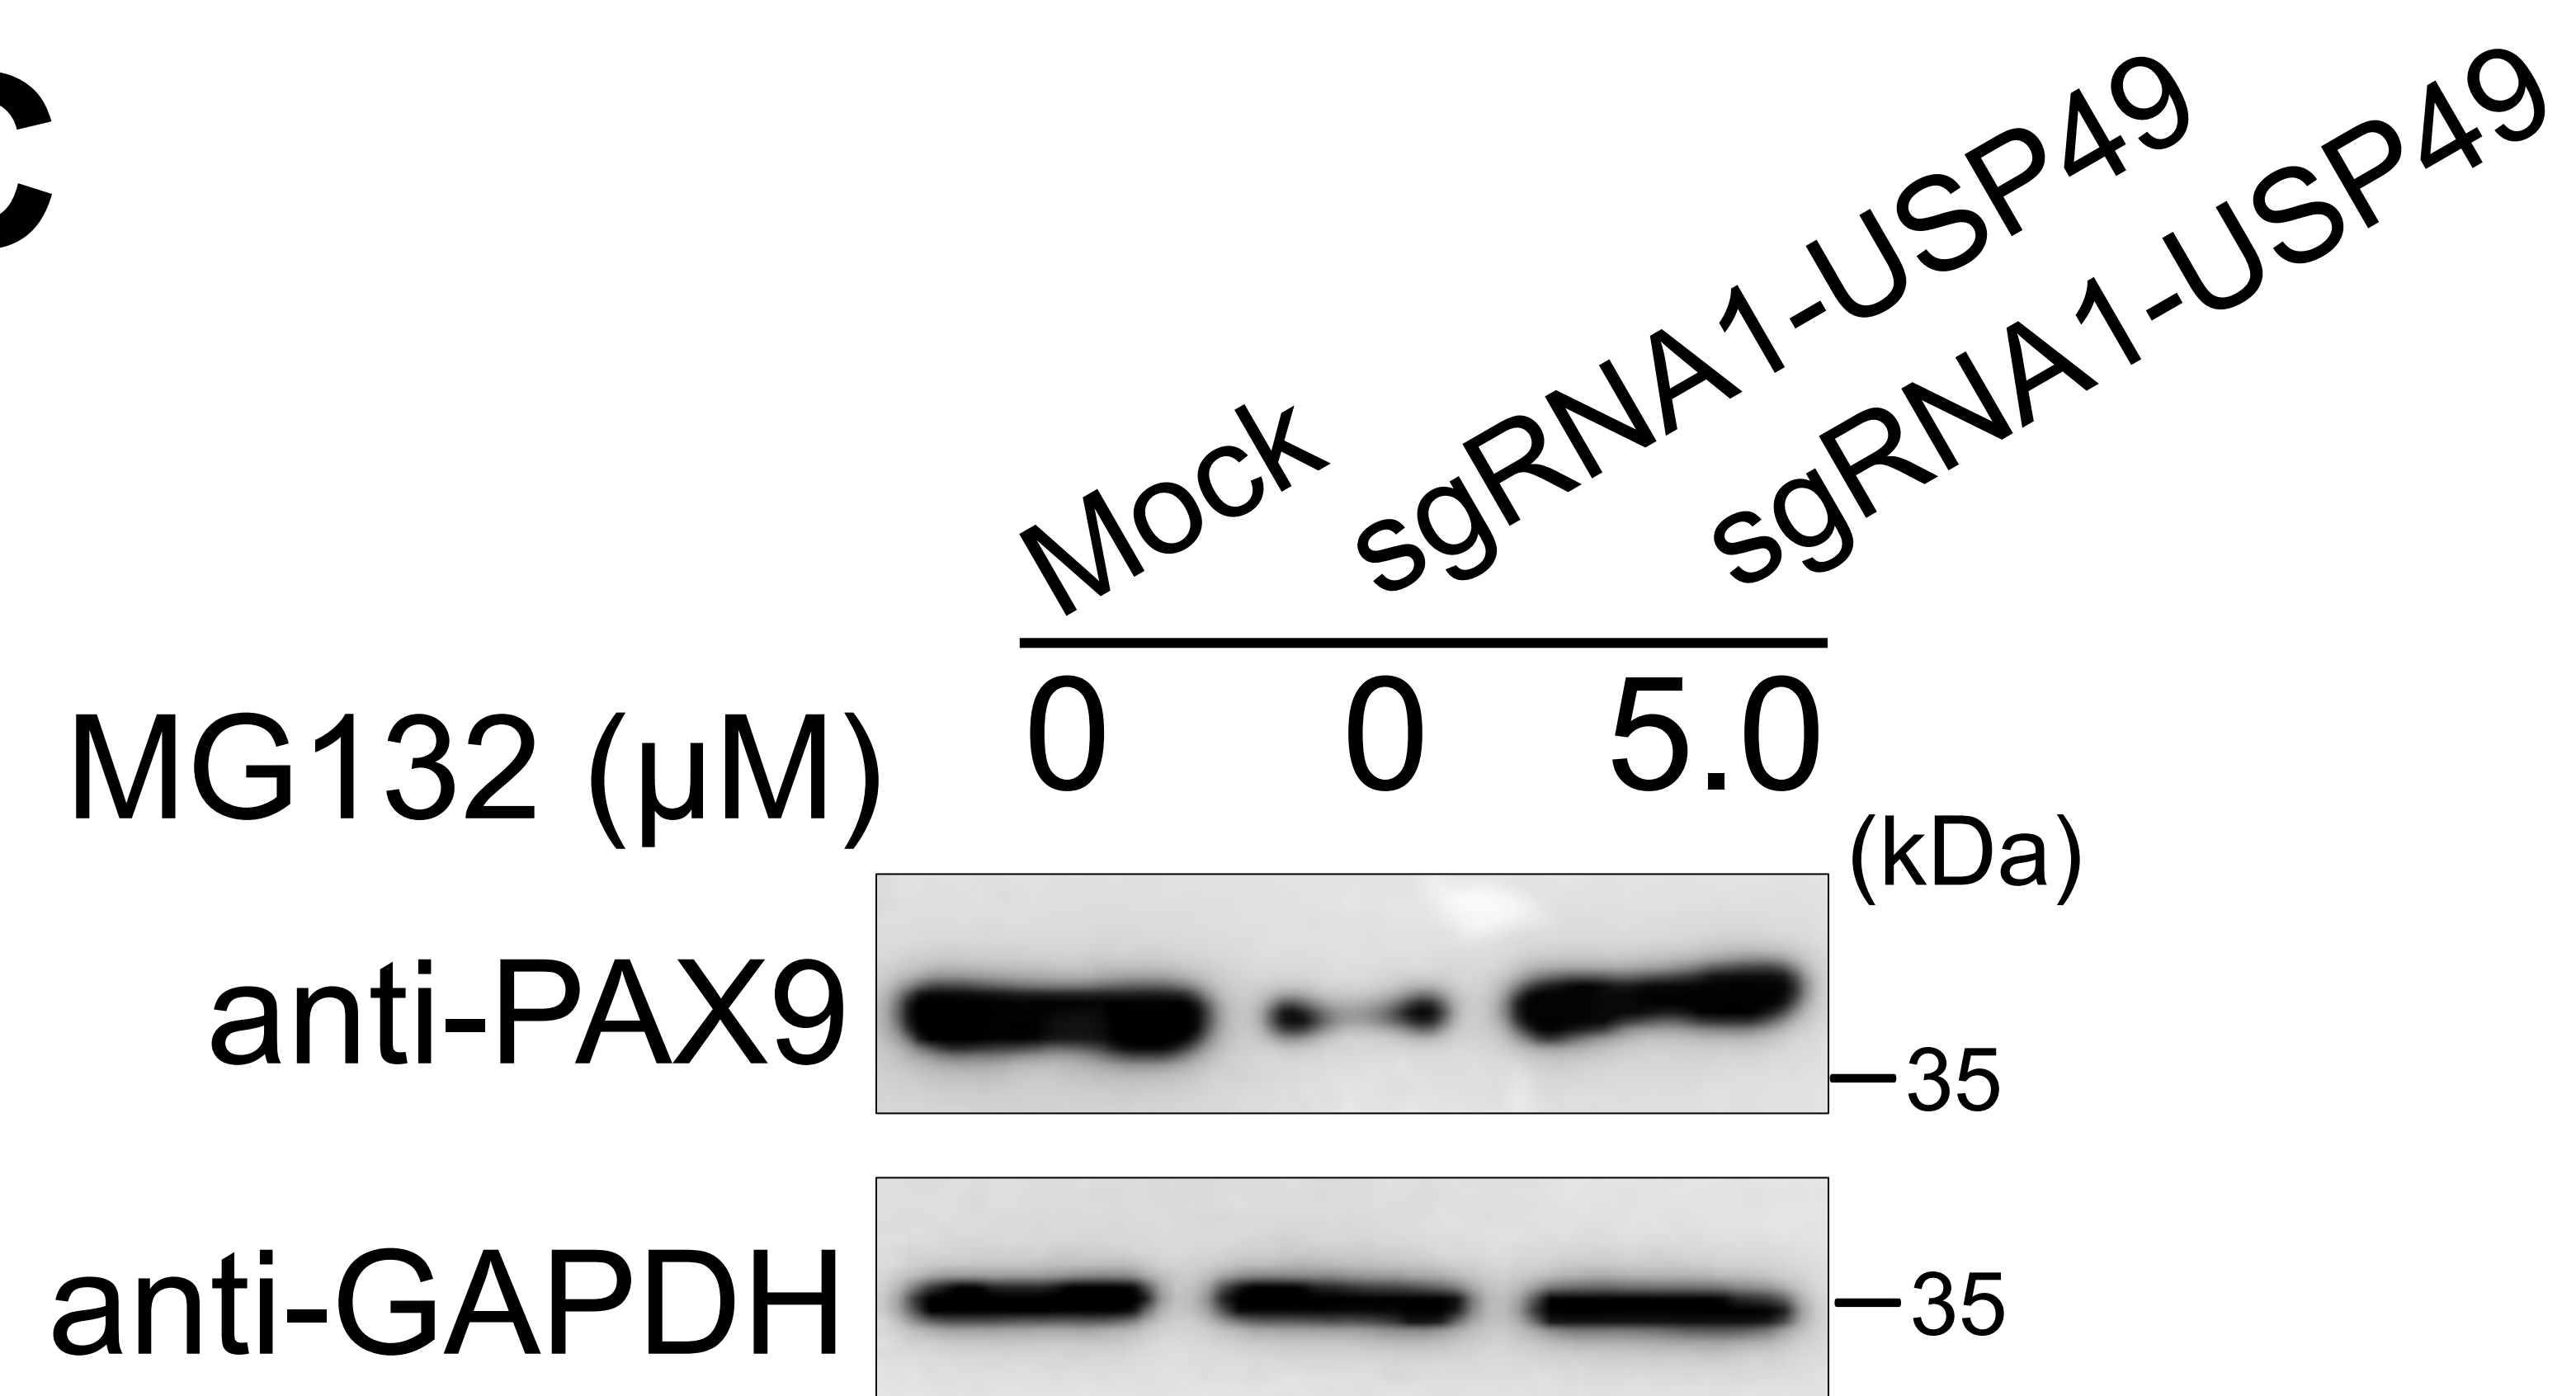

## D

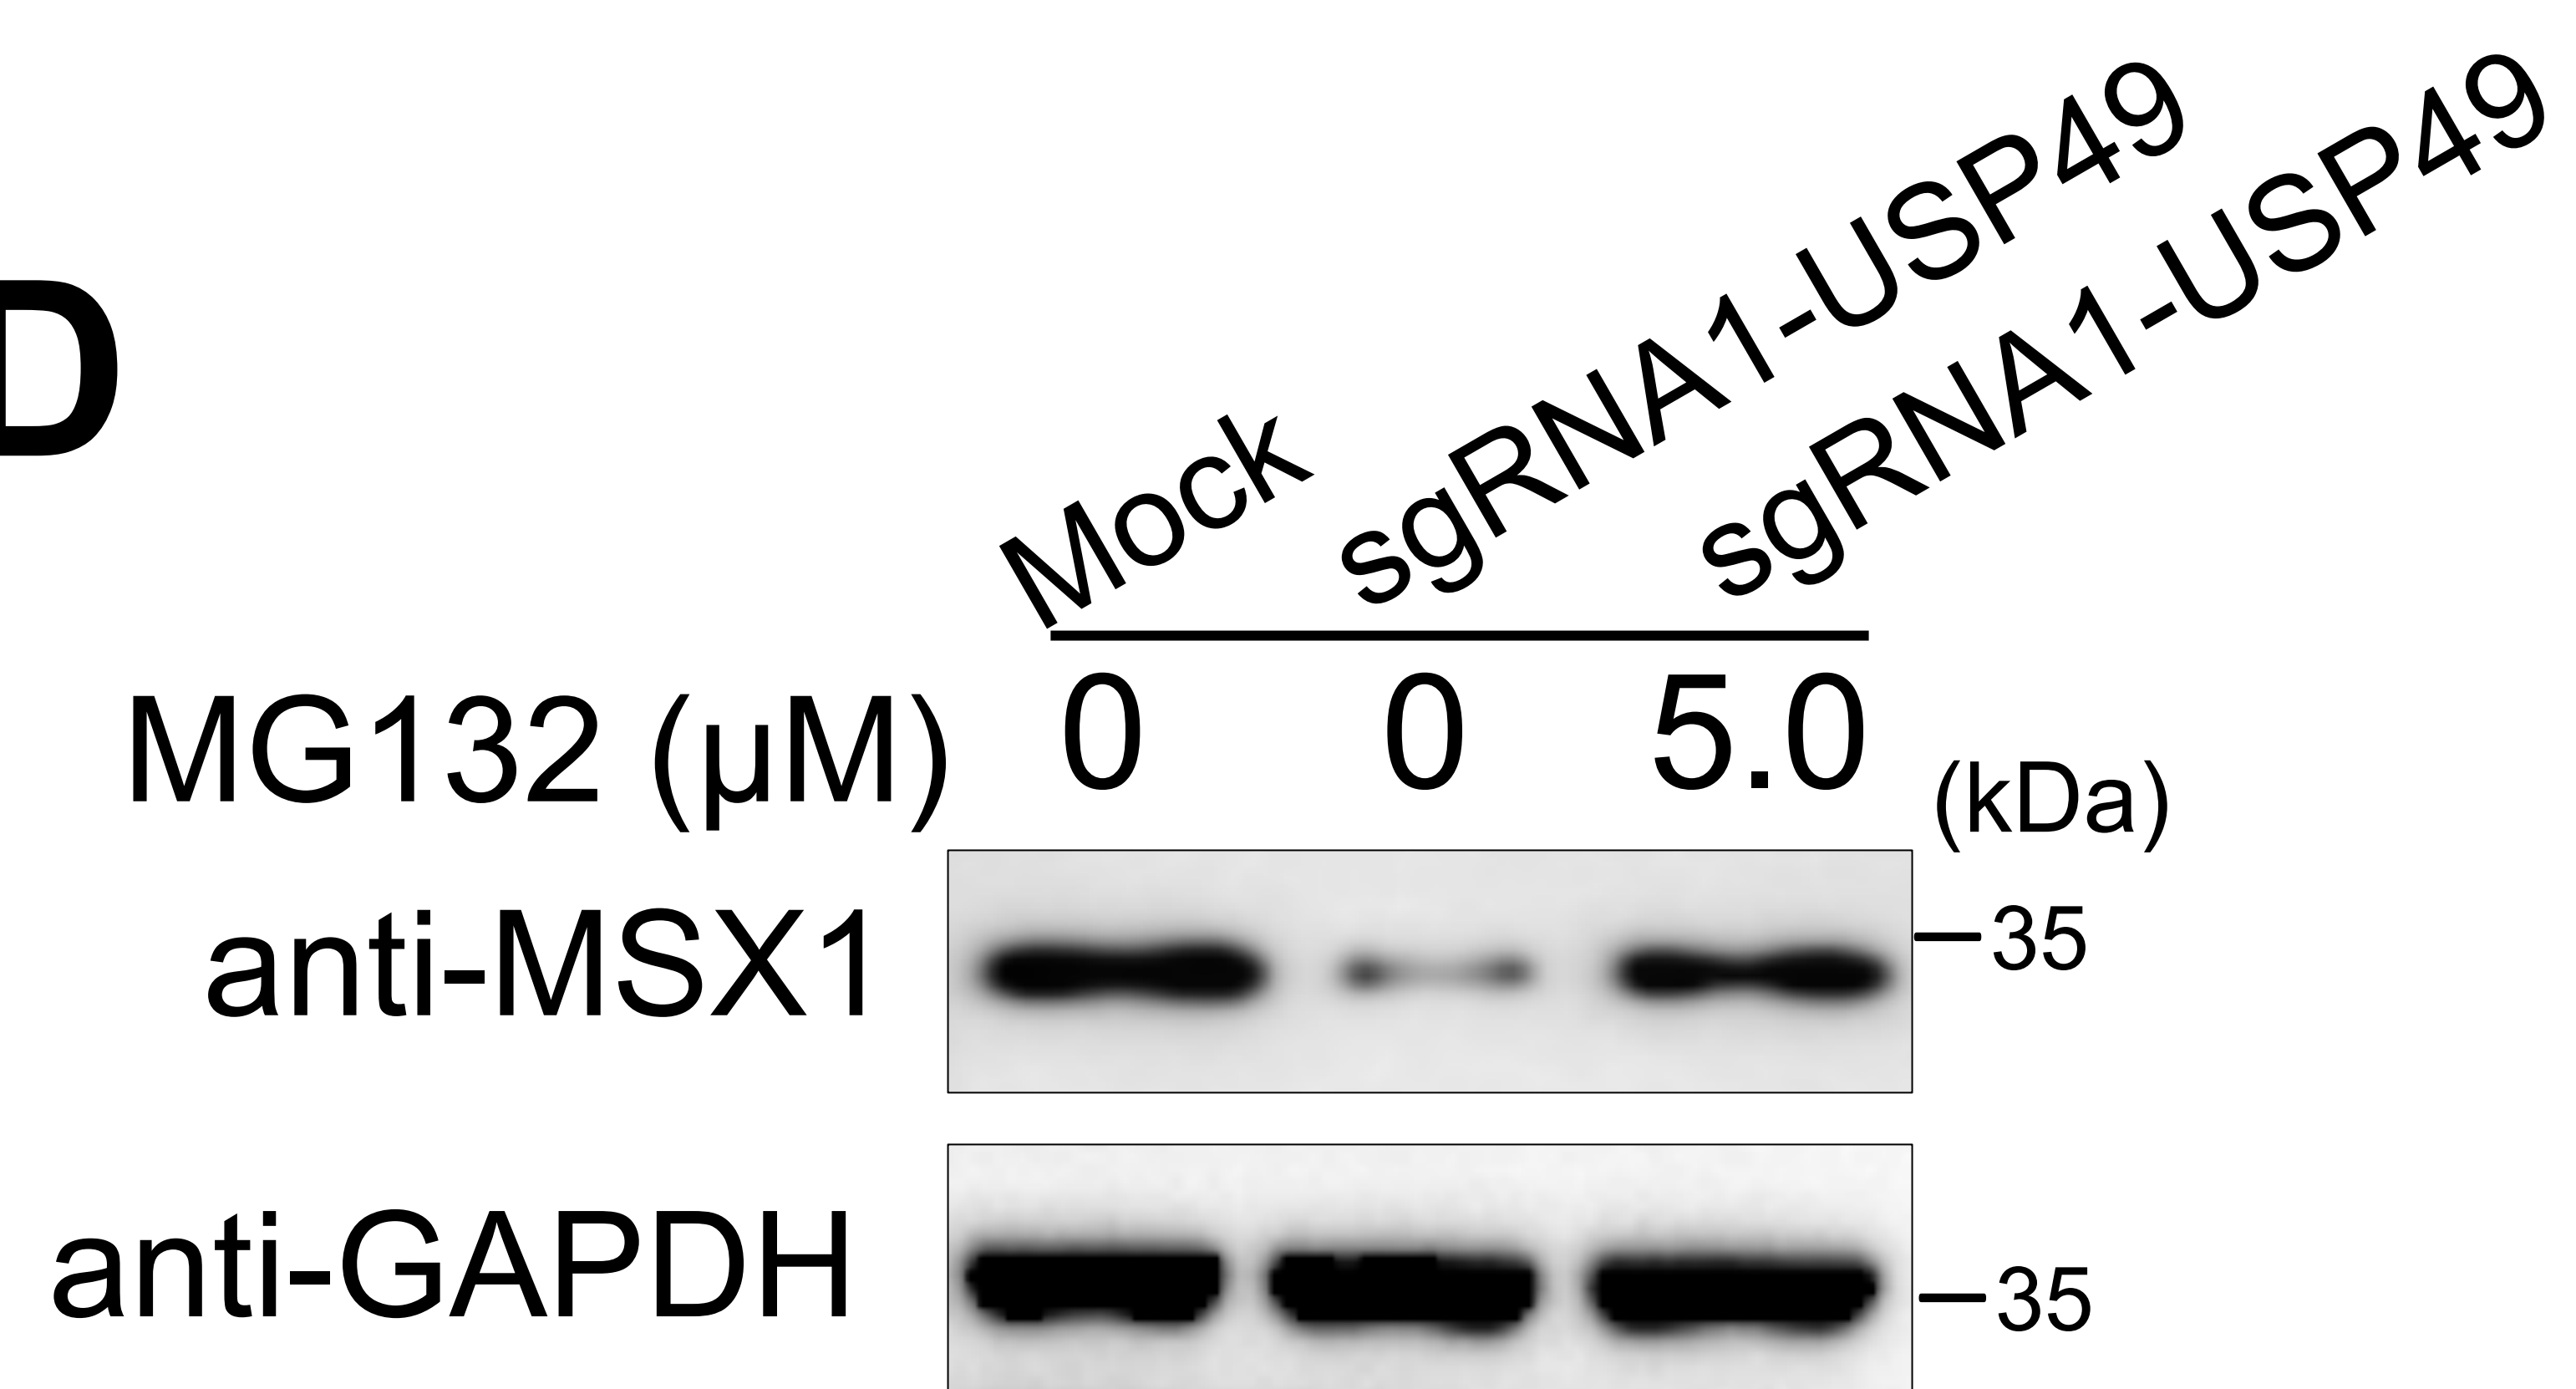

## E

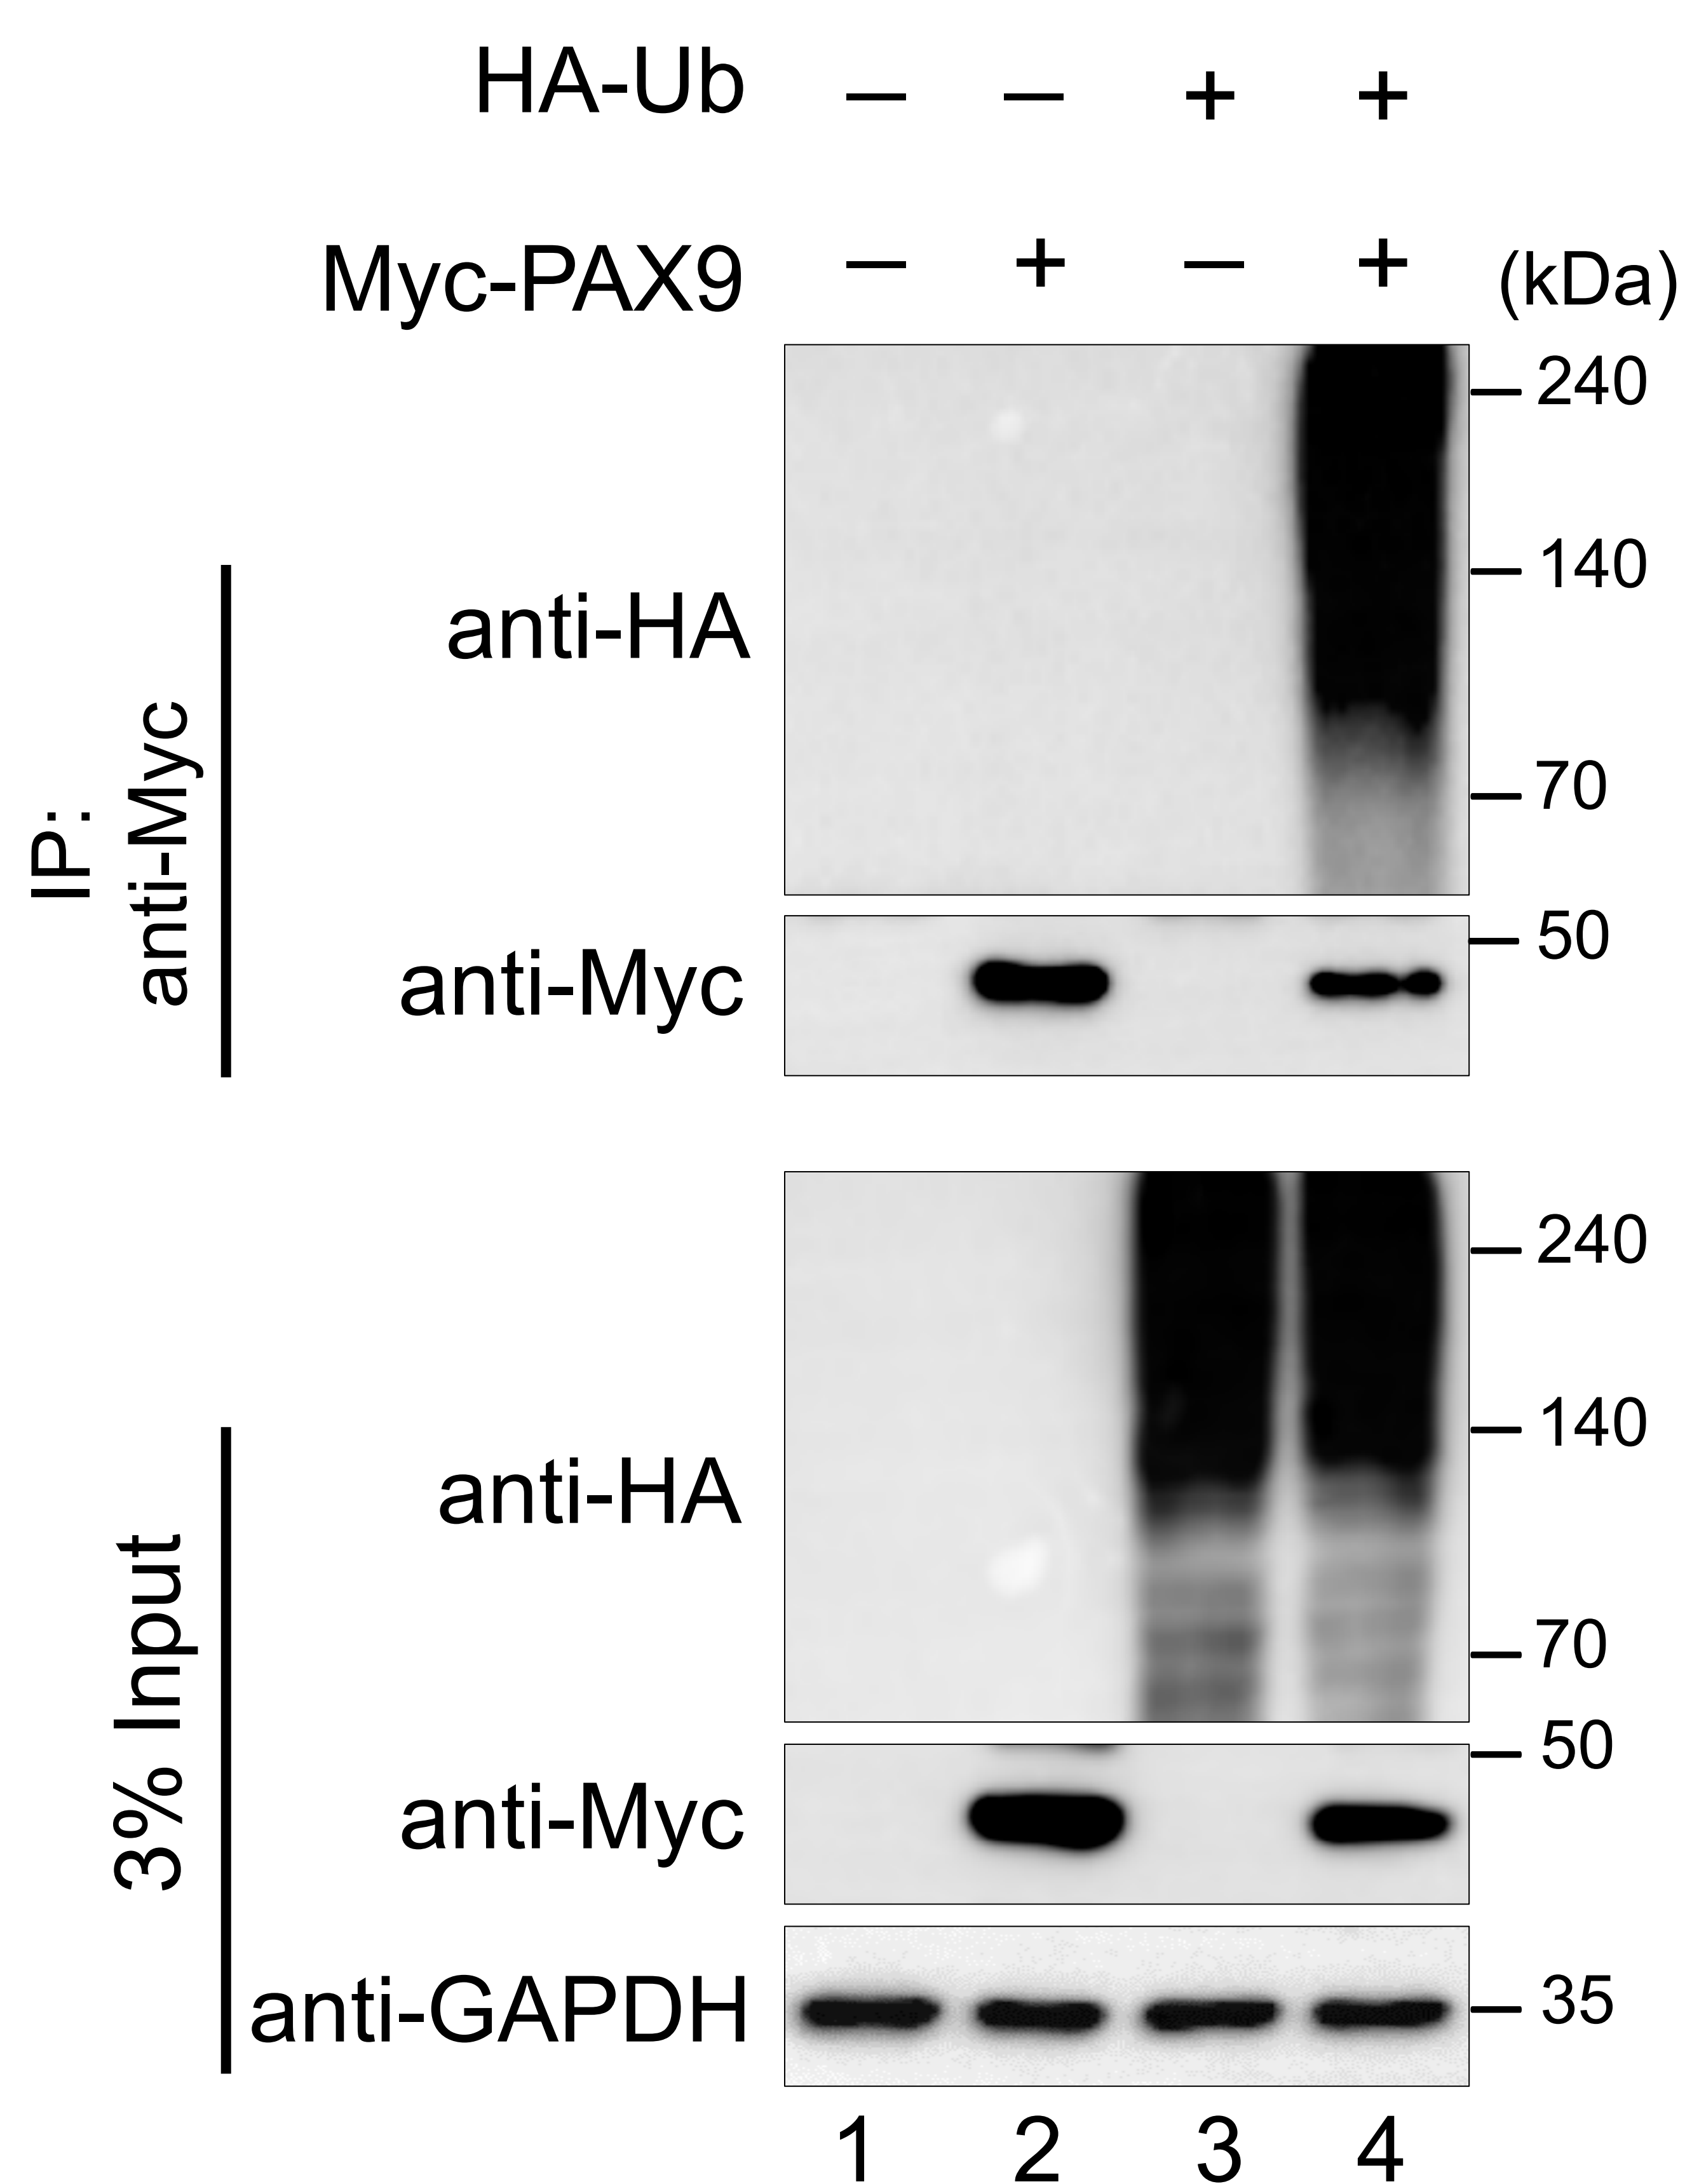

## F

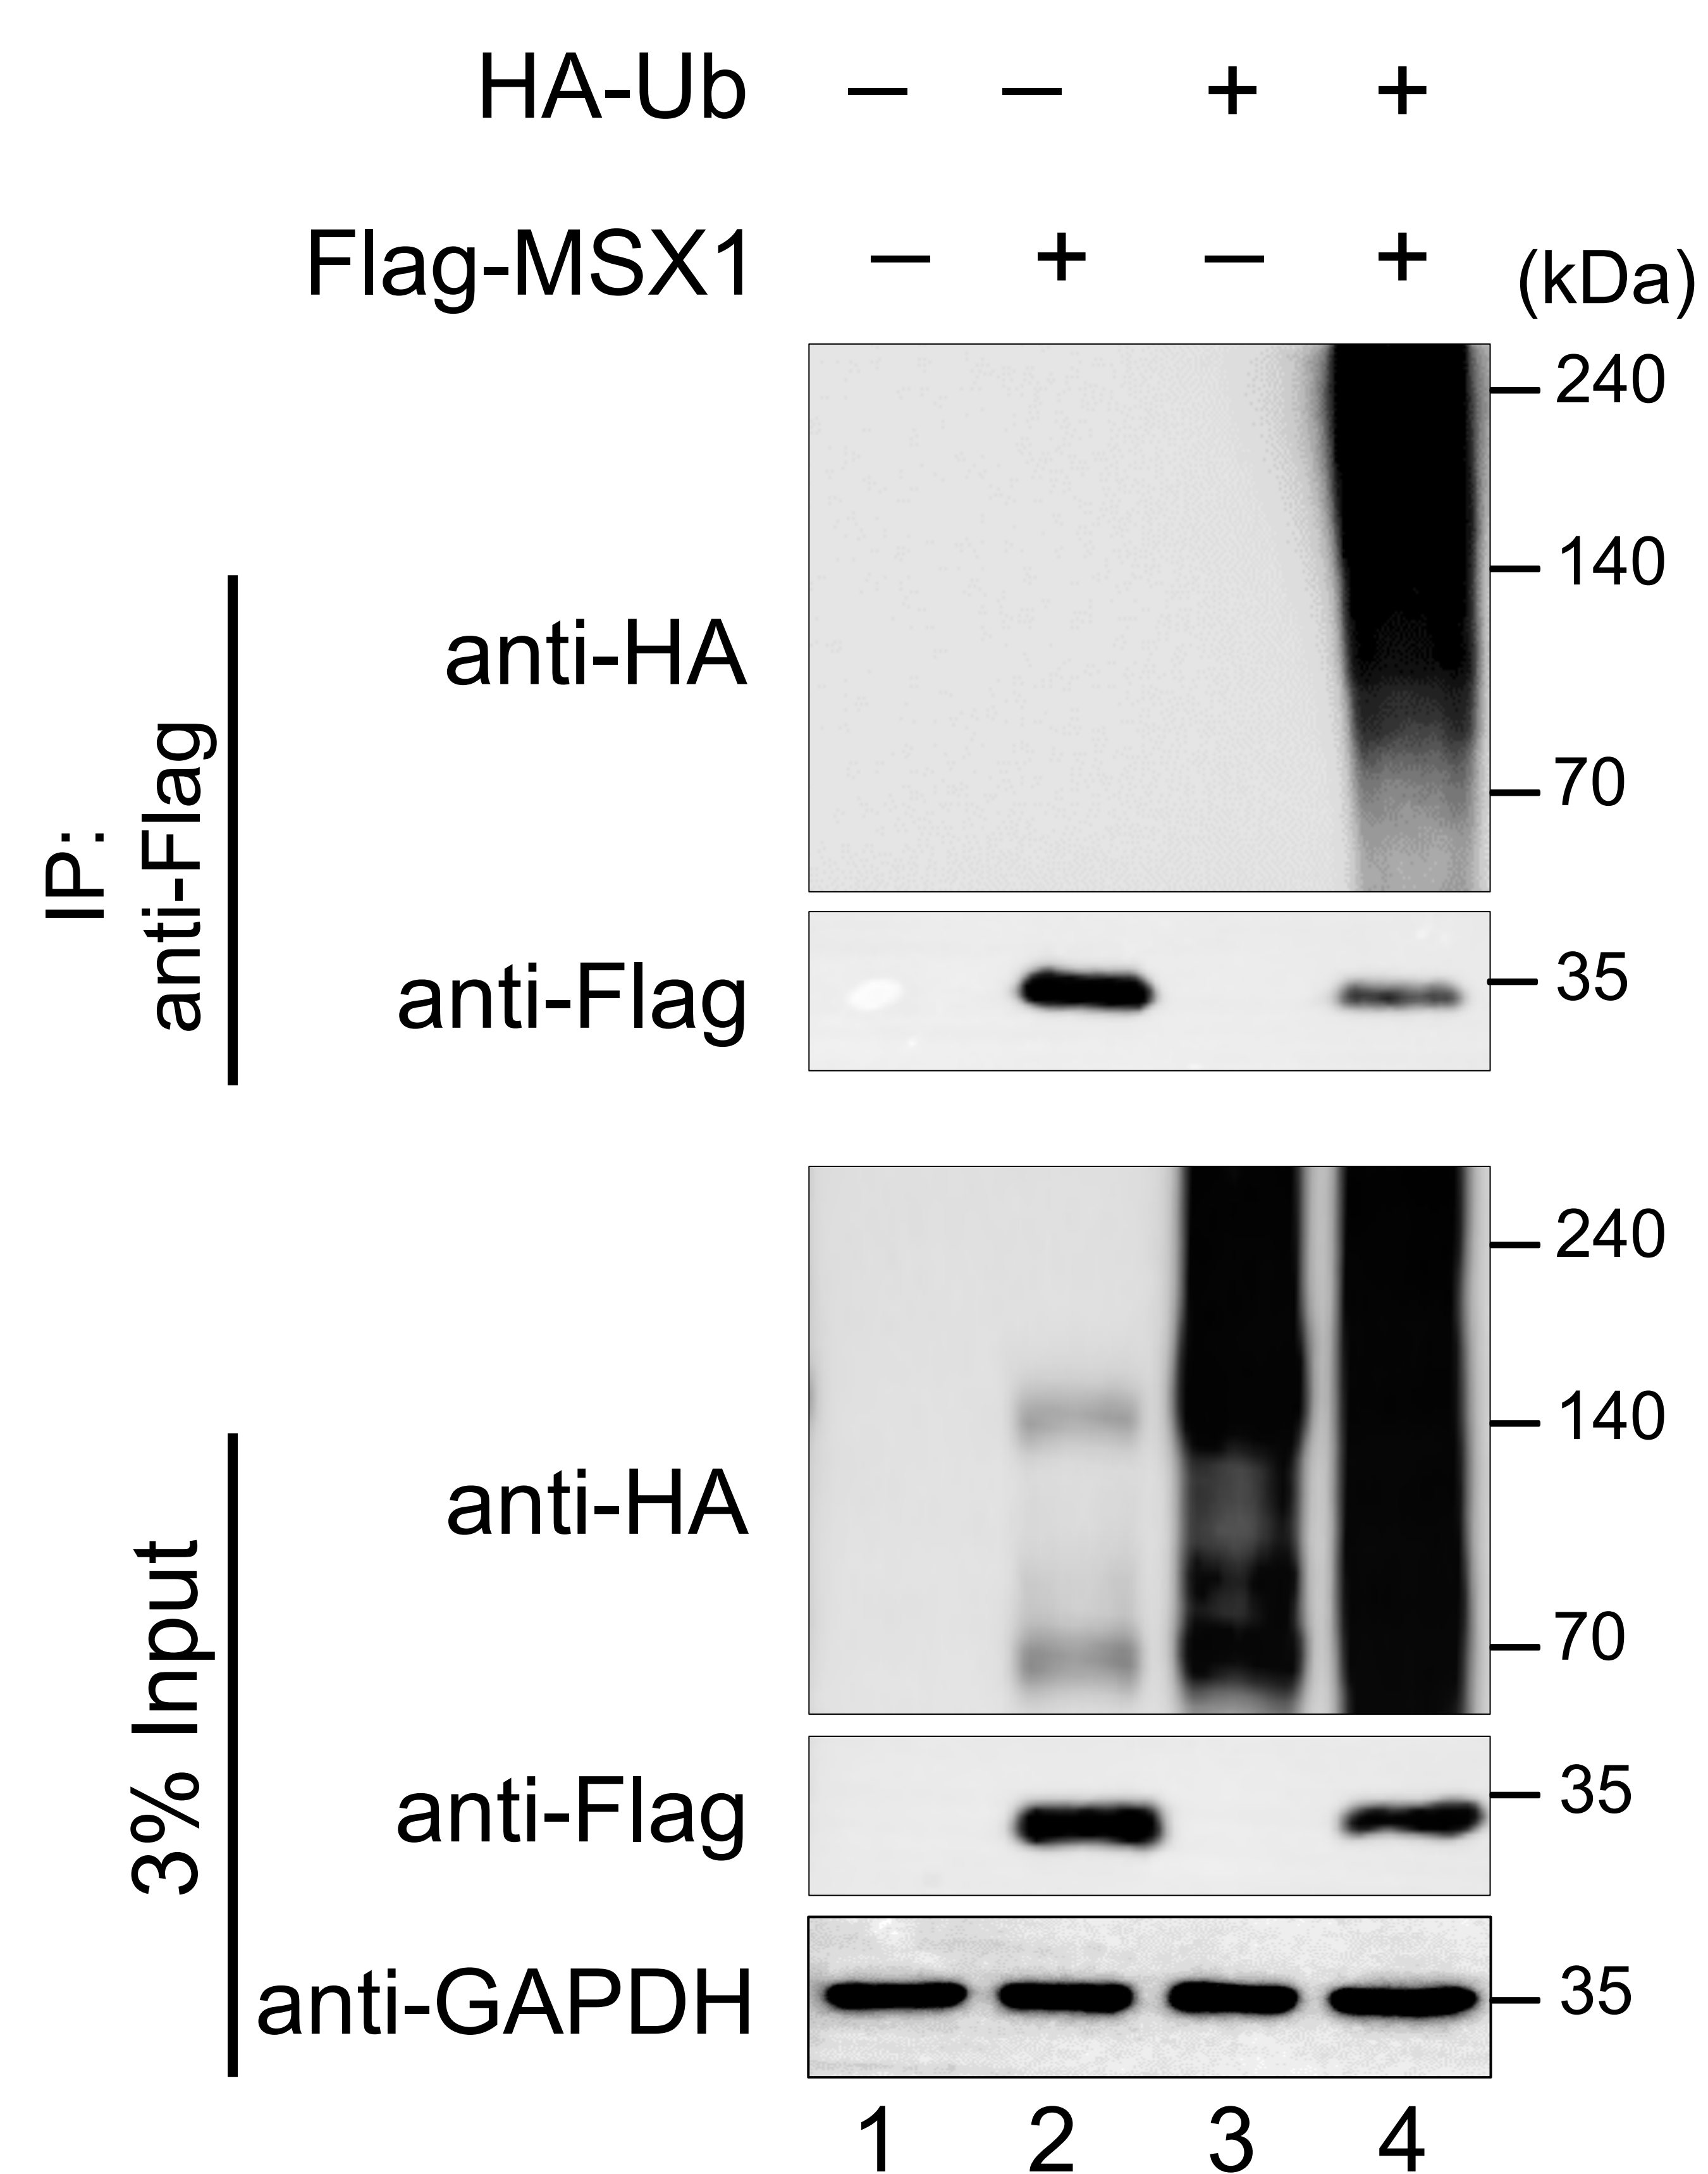



# Supplementary Fig. S9

## A

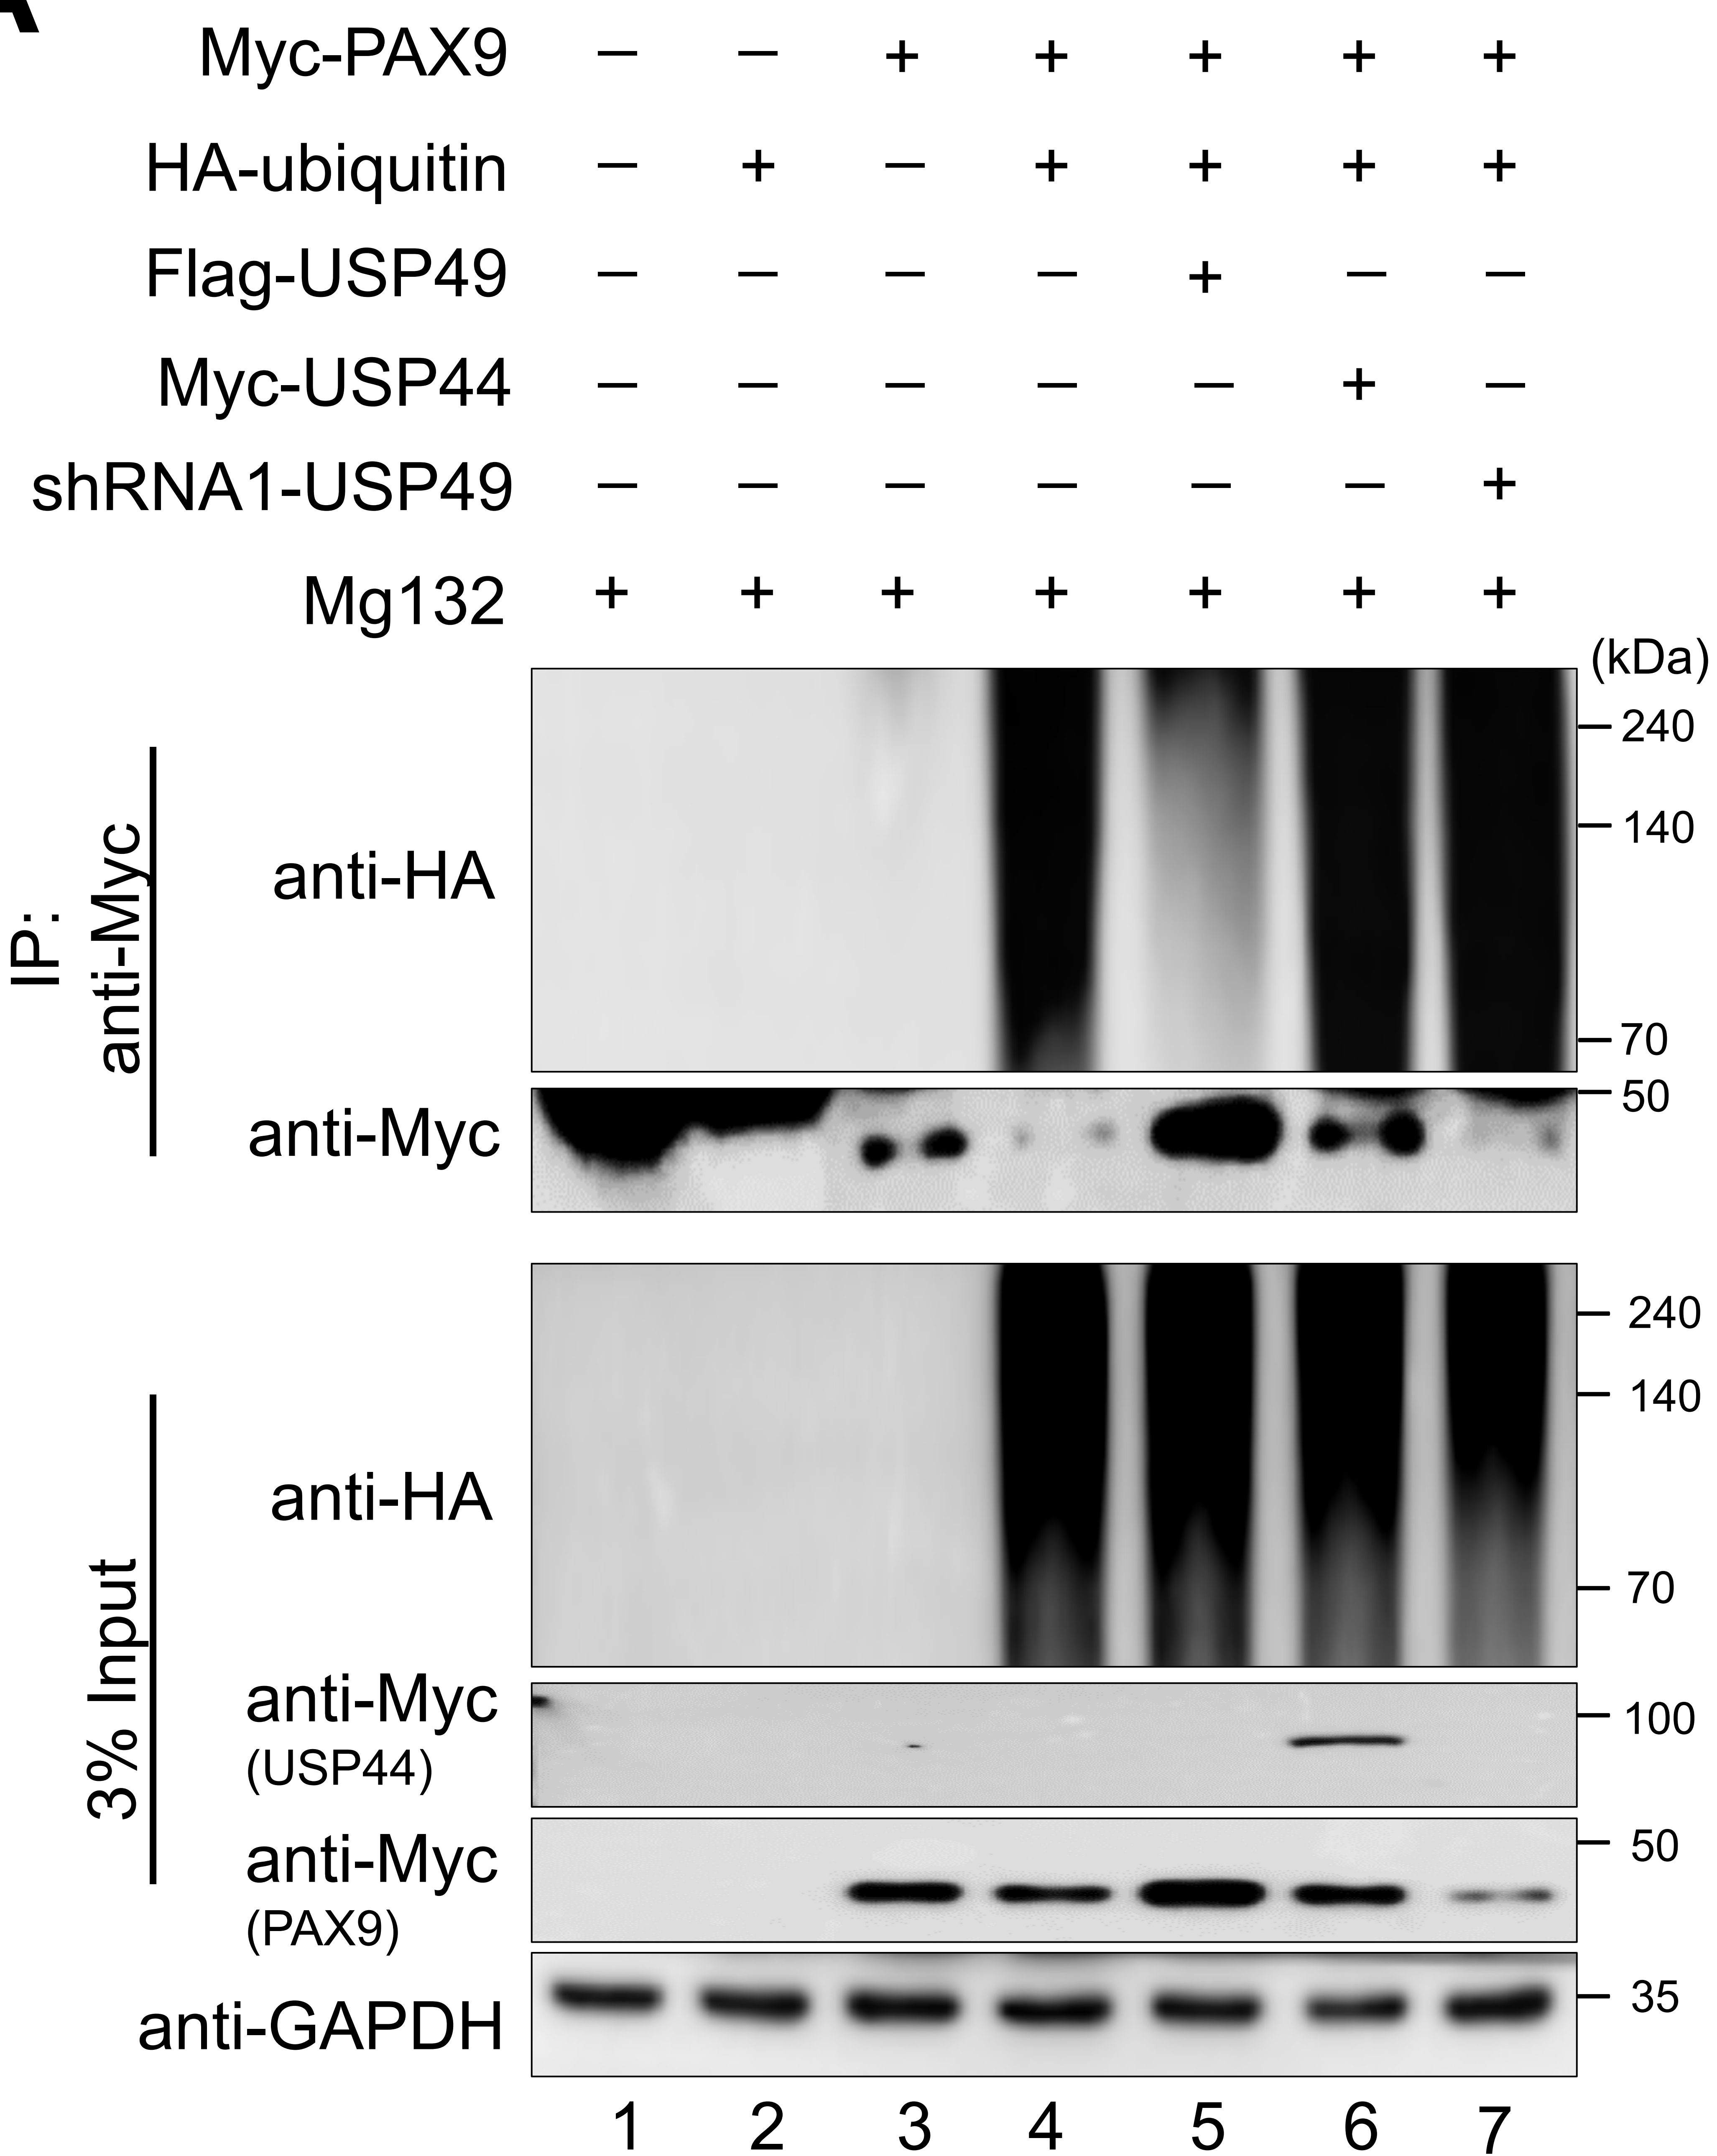

## B

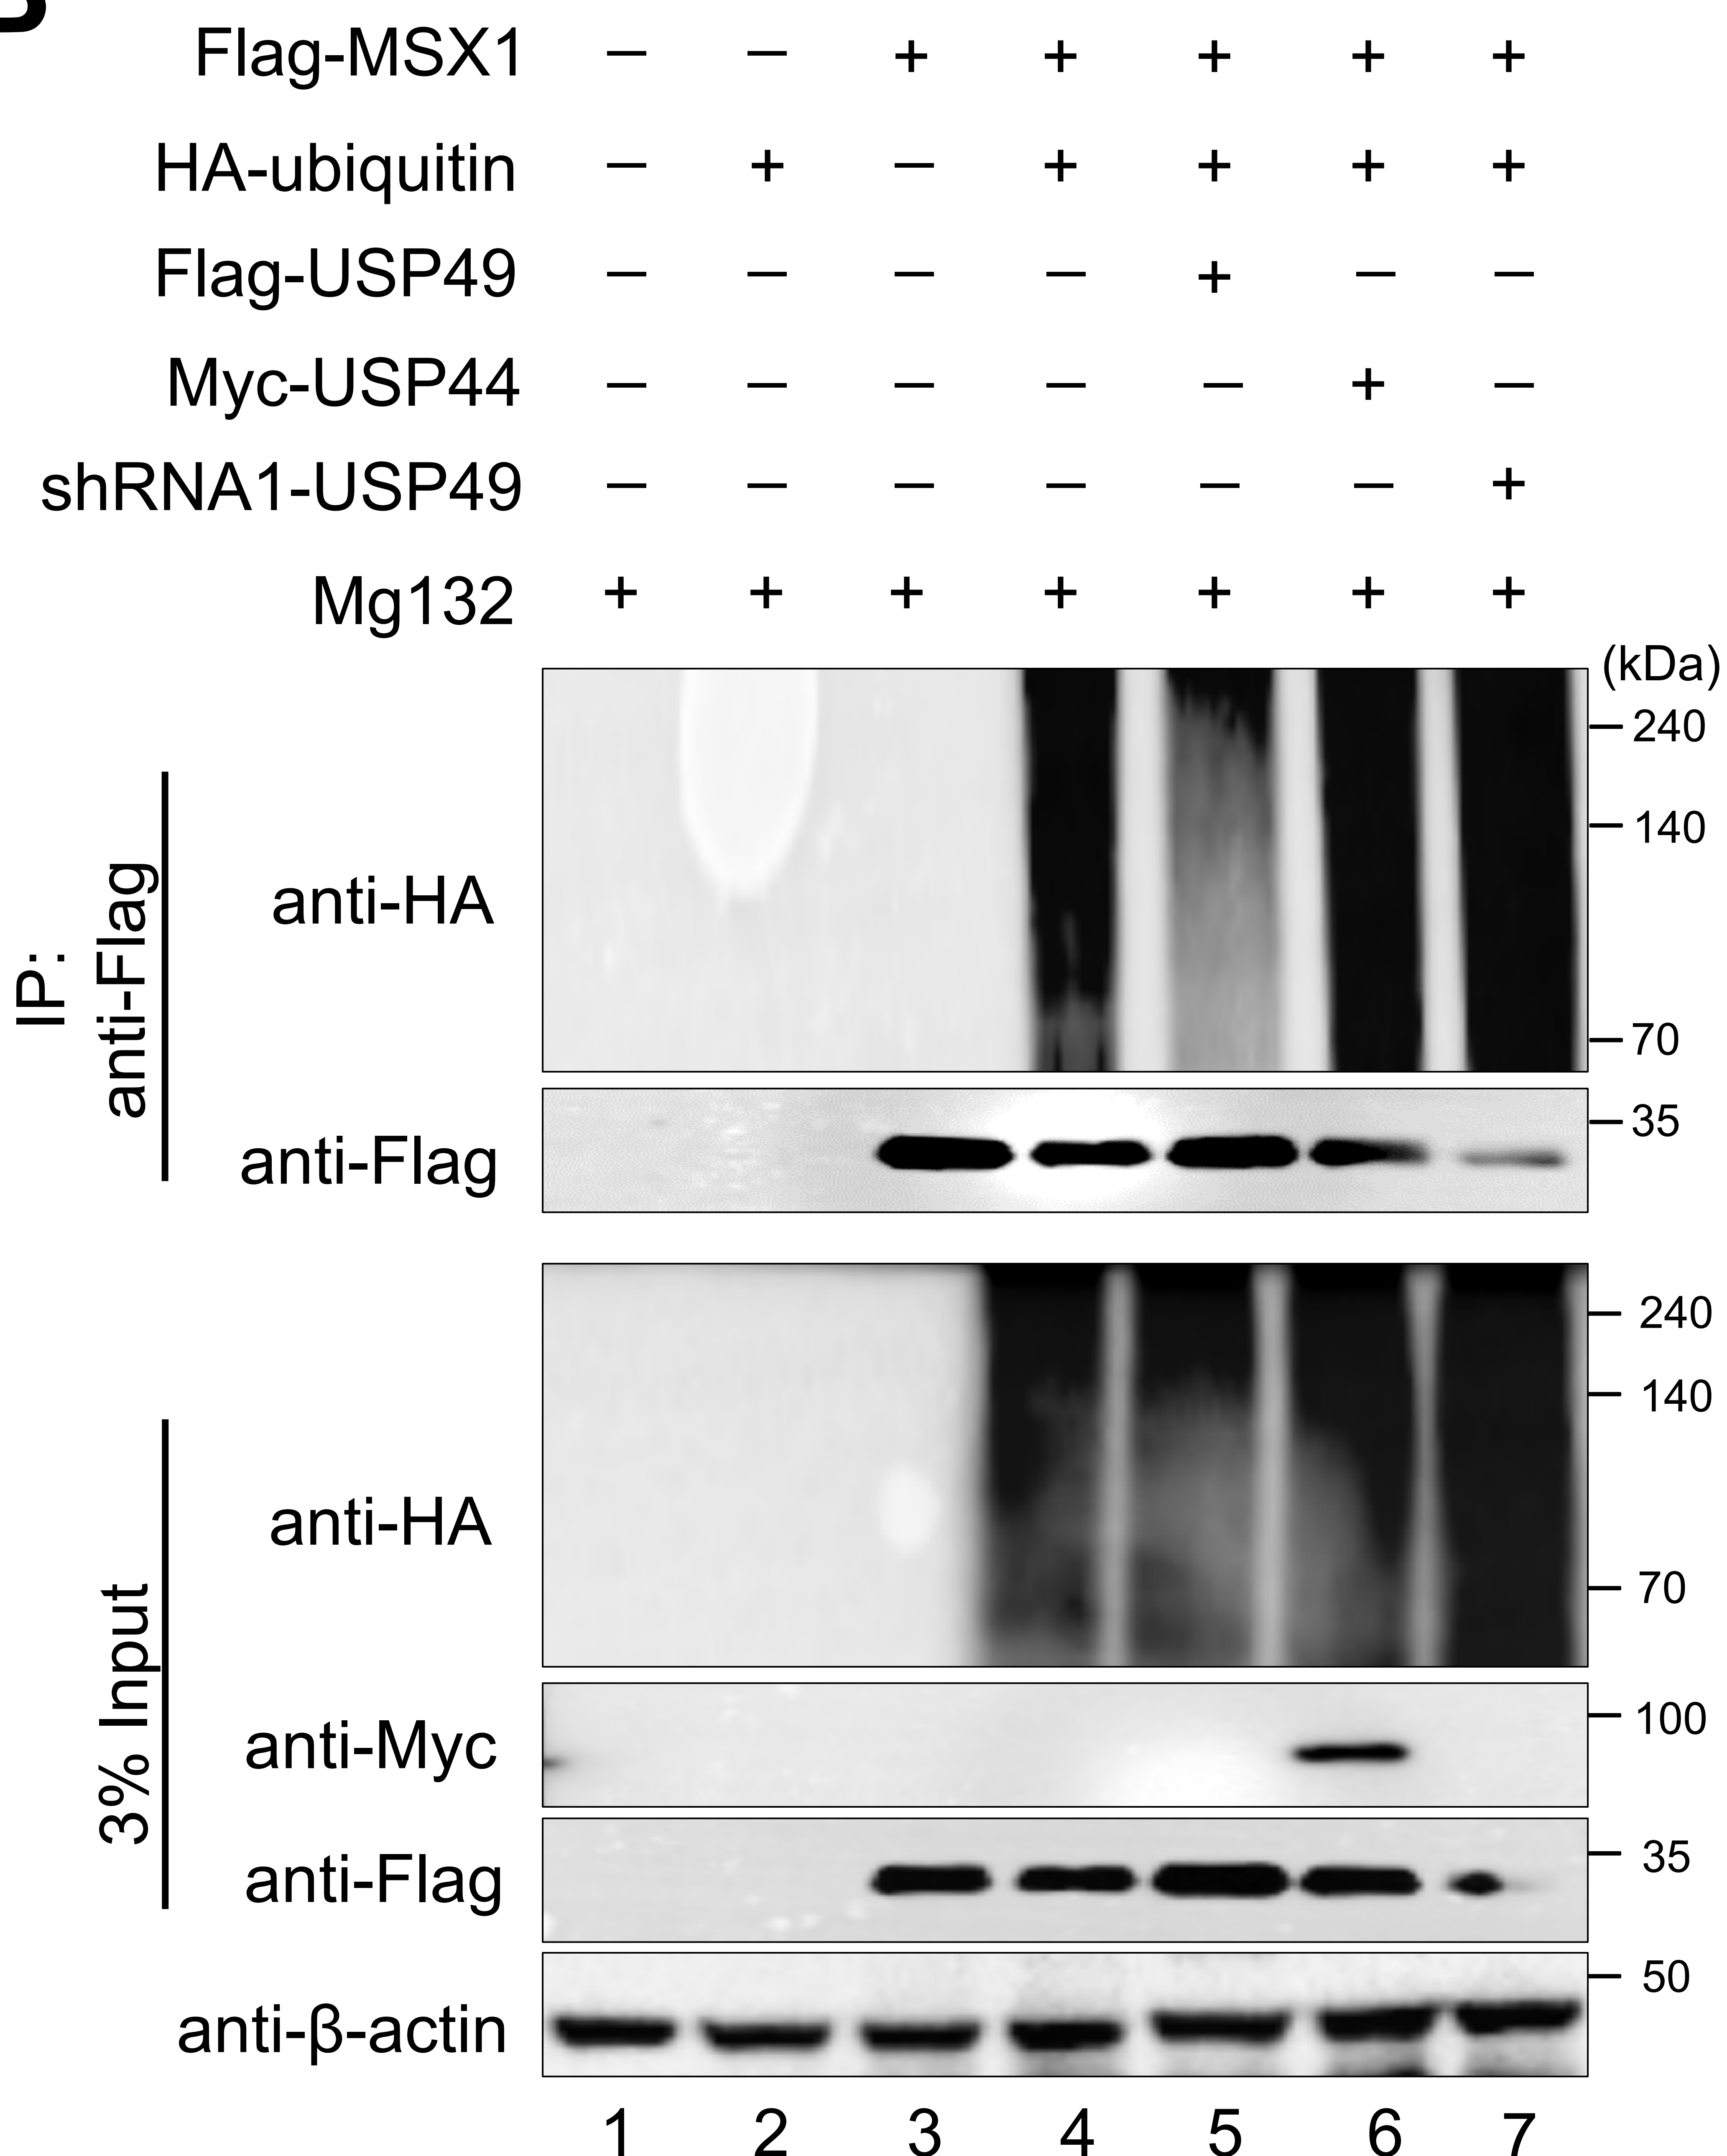

# Supplementary Fig. S10

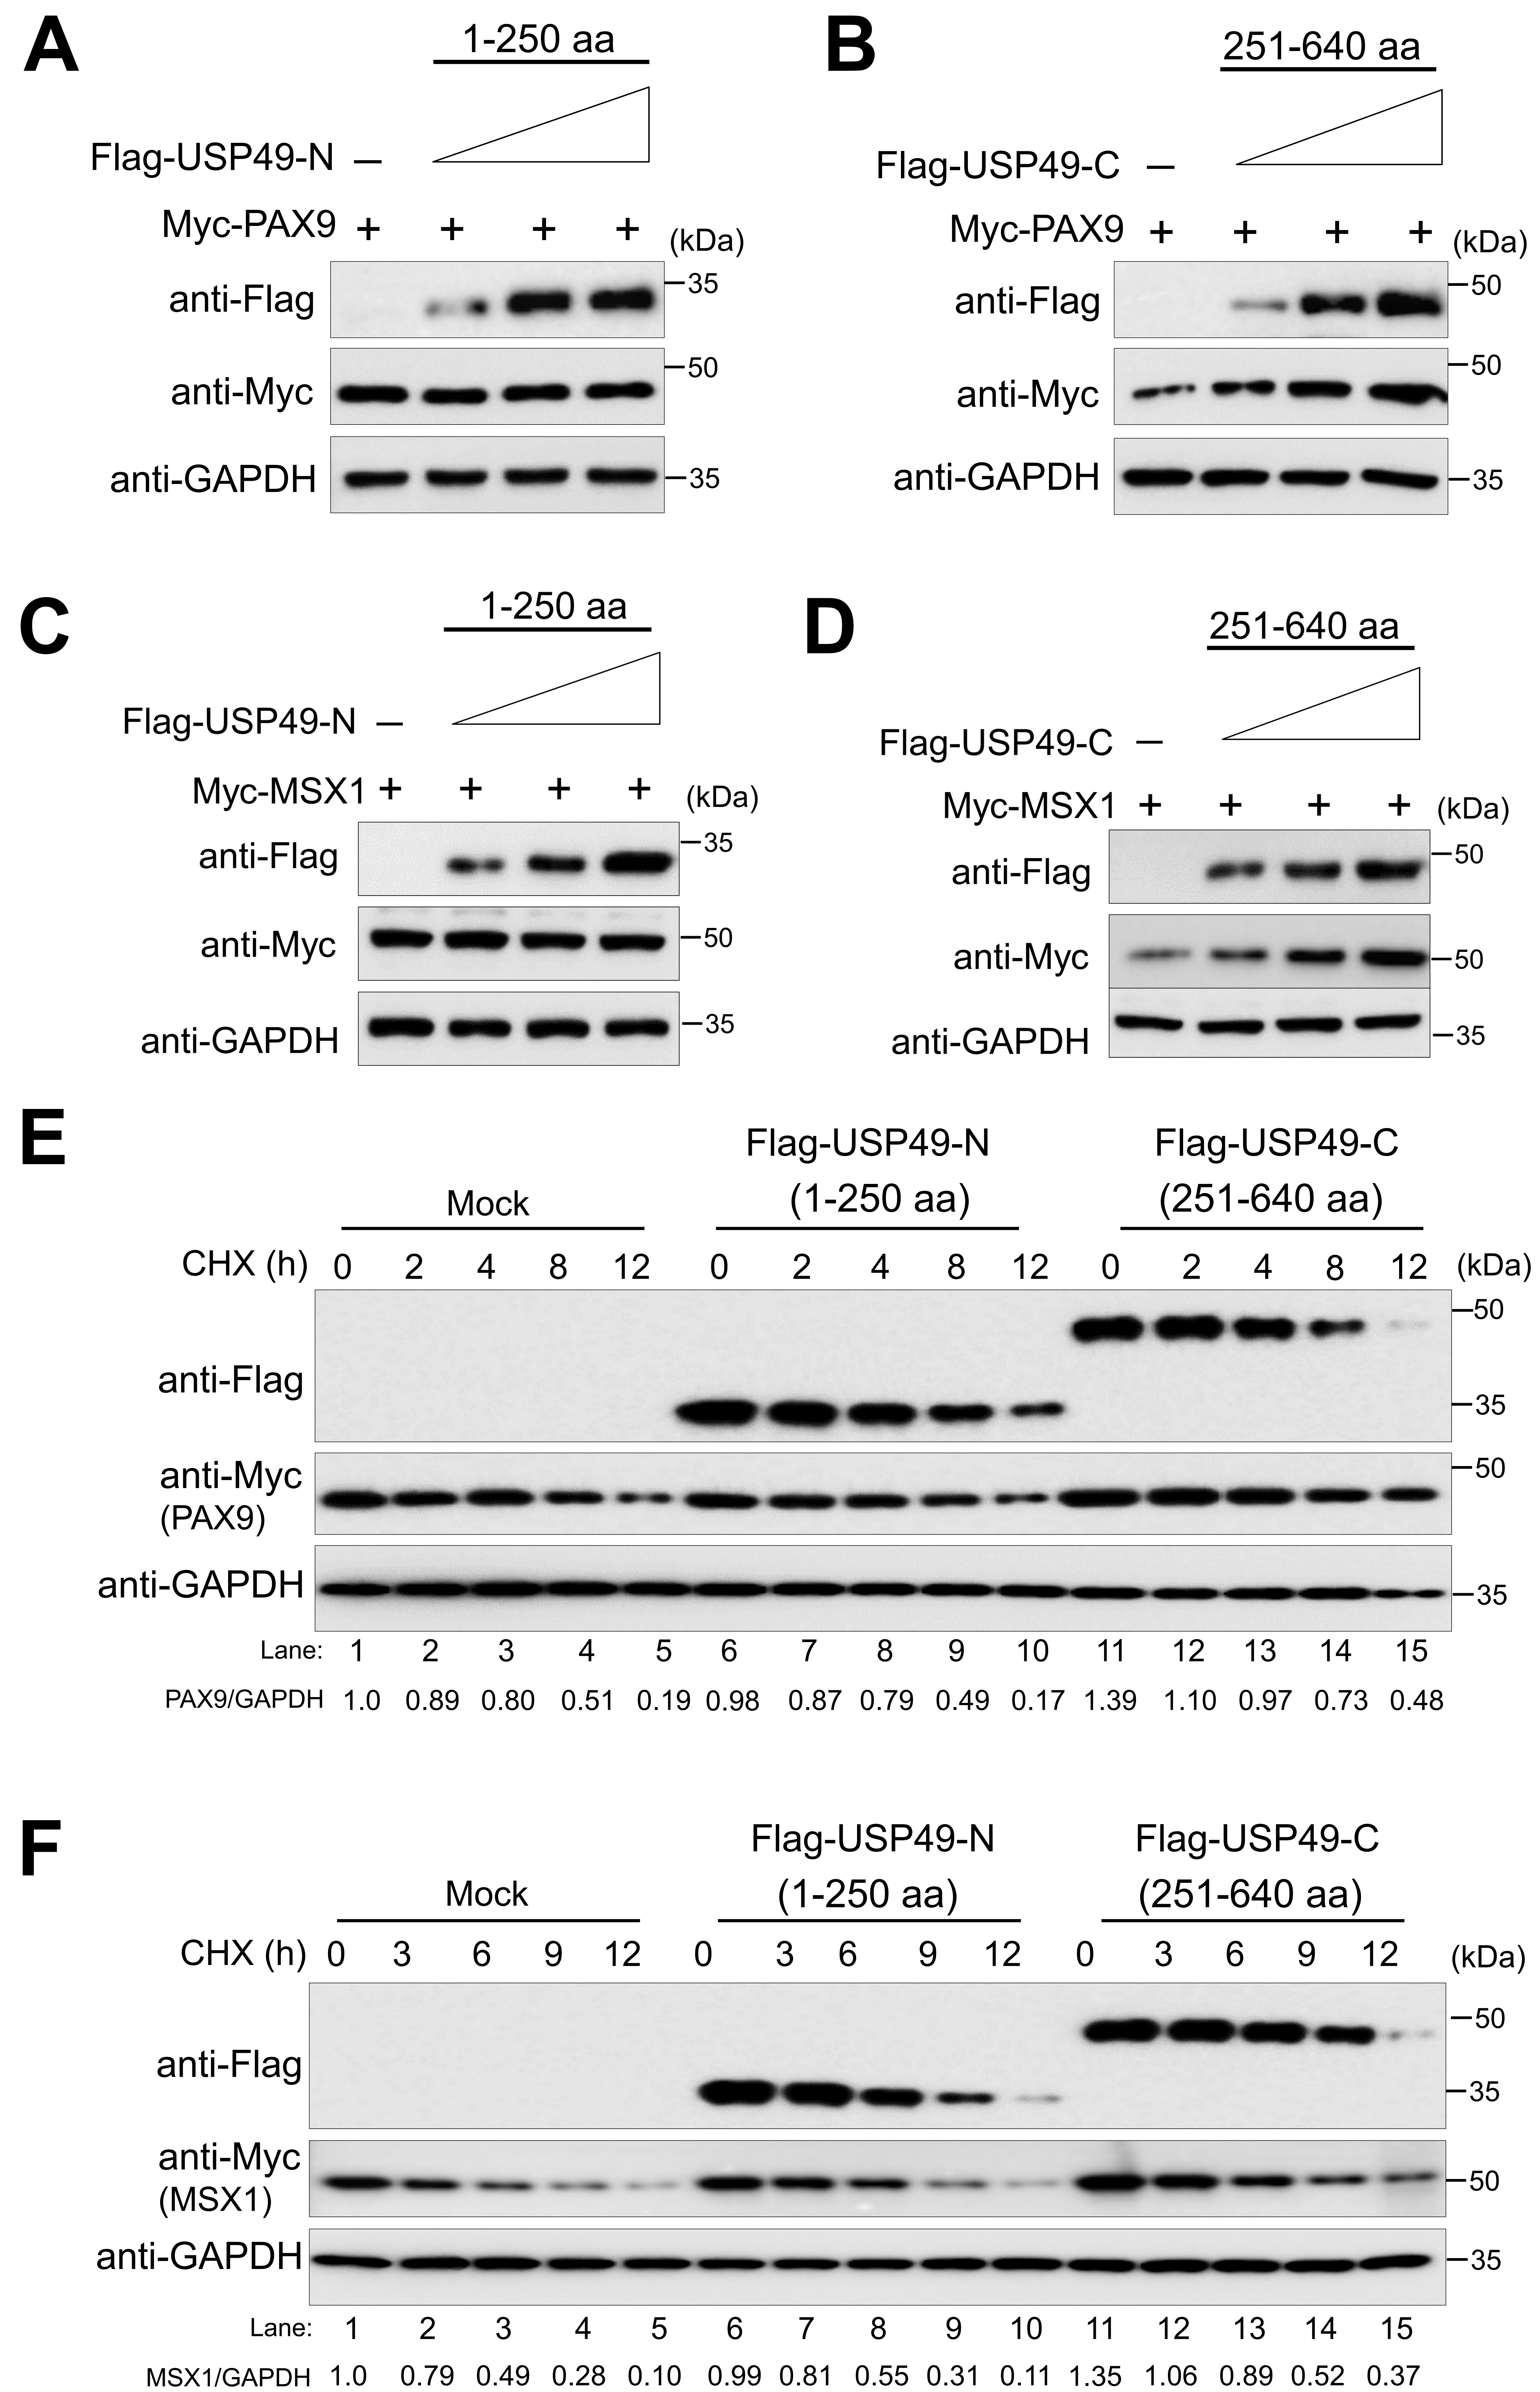

# Supplementary Fig. S11

## A

USP49

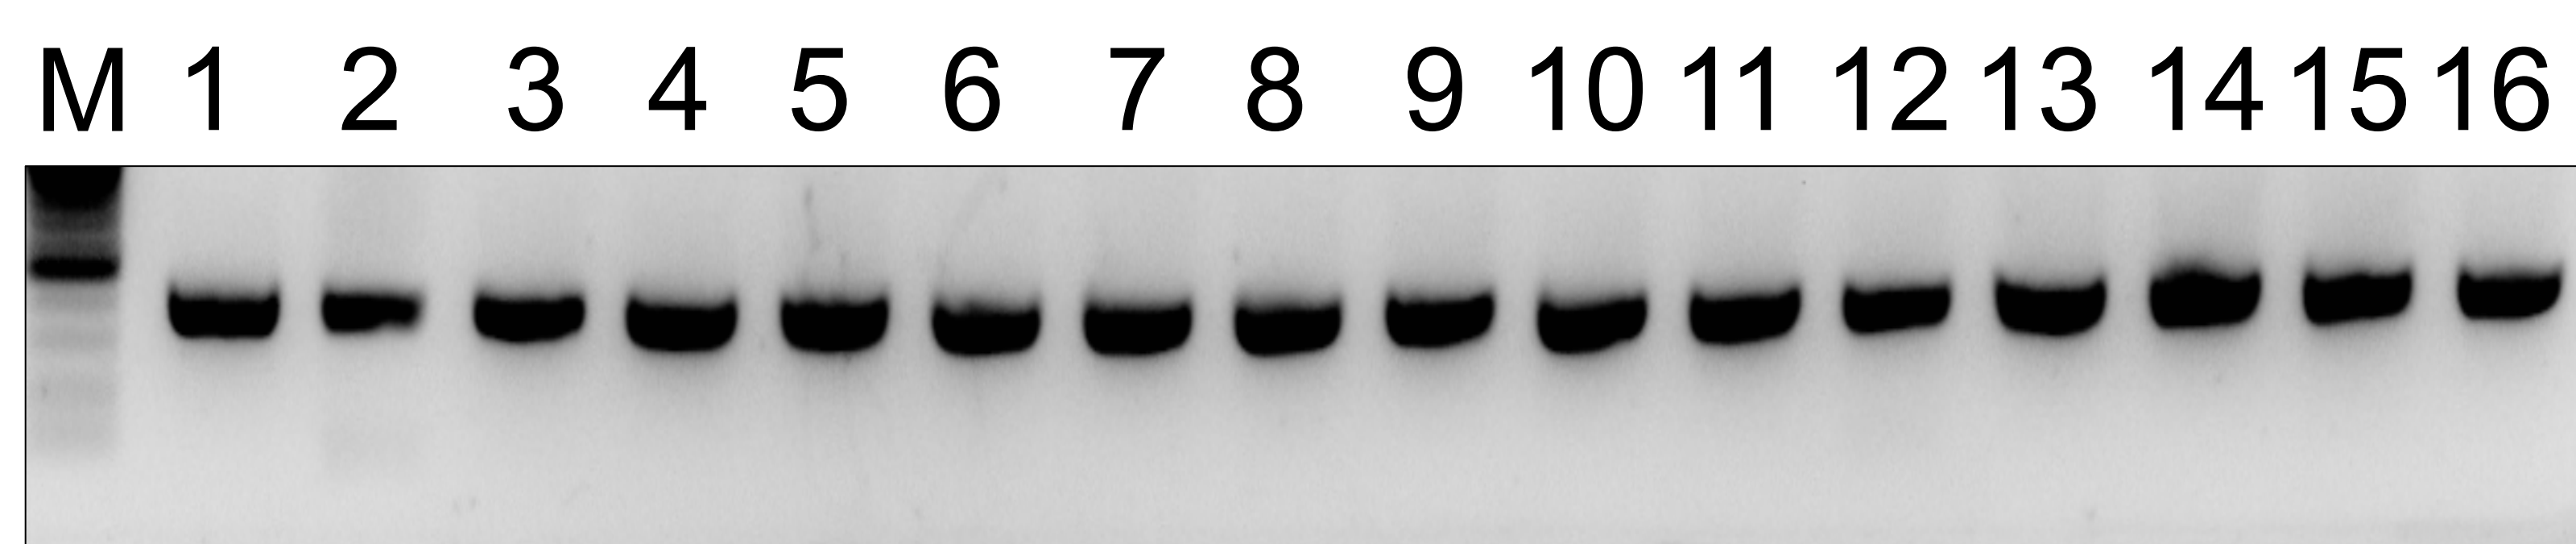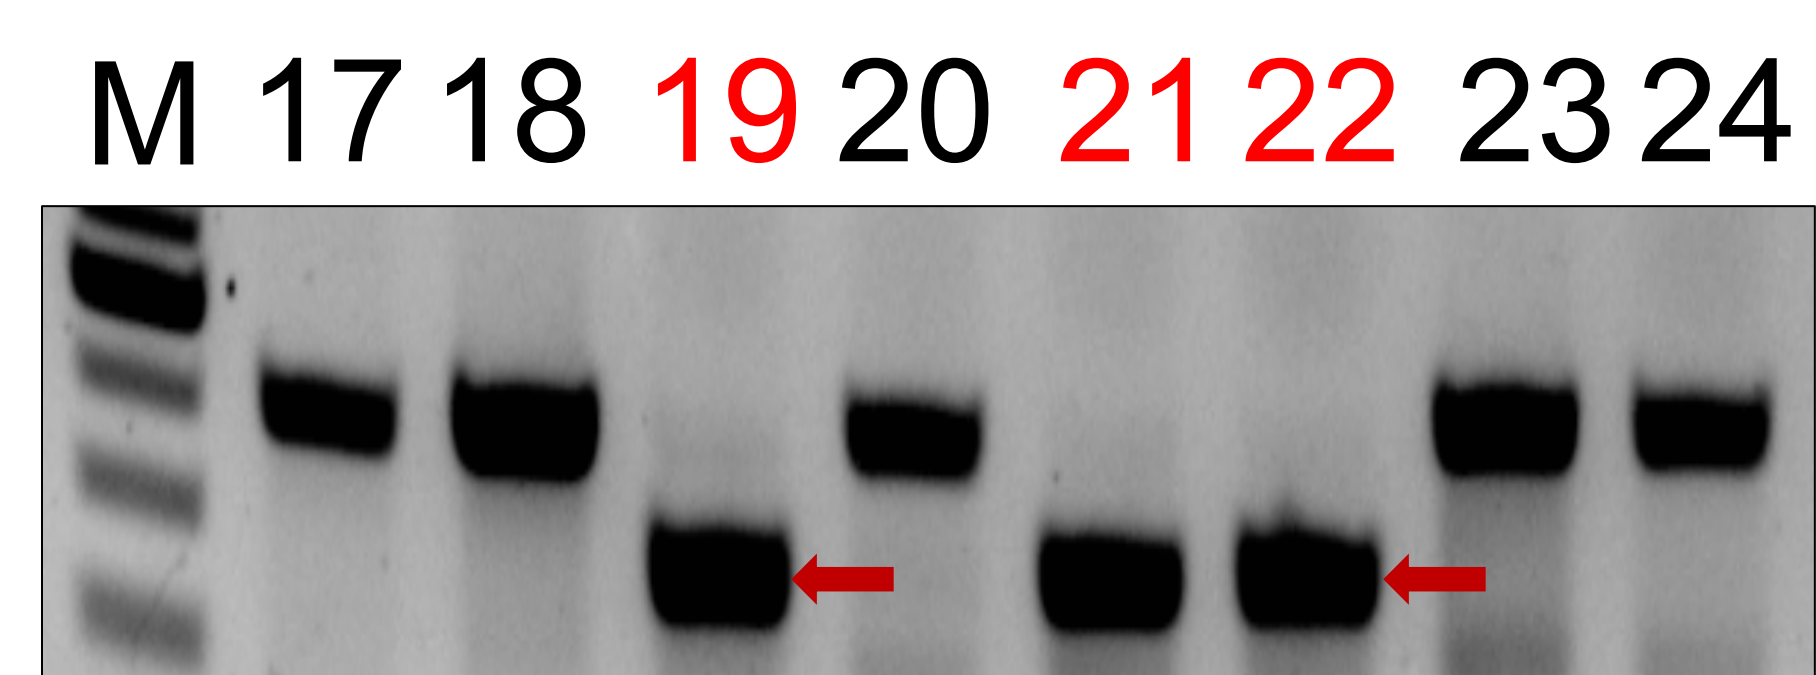

## B

USP49KO-hESCs Clone#22

sgRNA3

sgRNA2

TGG **CCT** GCGGCCGCTATATTGAGGAC ----- GCTCAATGATAACCCAGAGG**GGG**ACCT (WT)  
TGG **CCT** GCGG----- GAGG**GGG**ACCT (-125) (X3)  
TGG **CCT** GCG----- GAGG**GGG**ACCT (-126) (X4)

## C

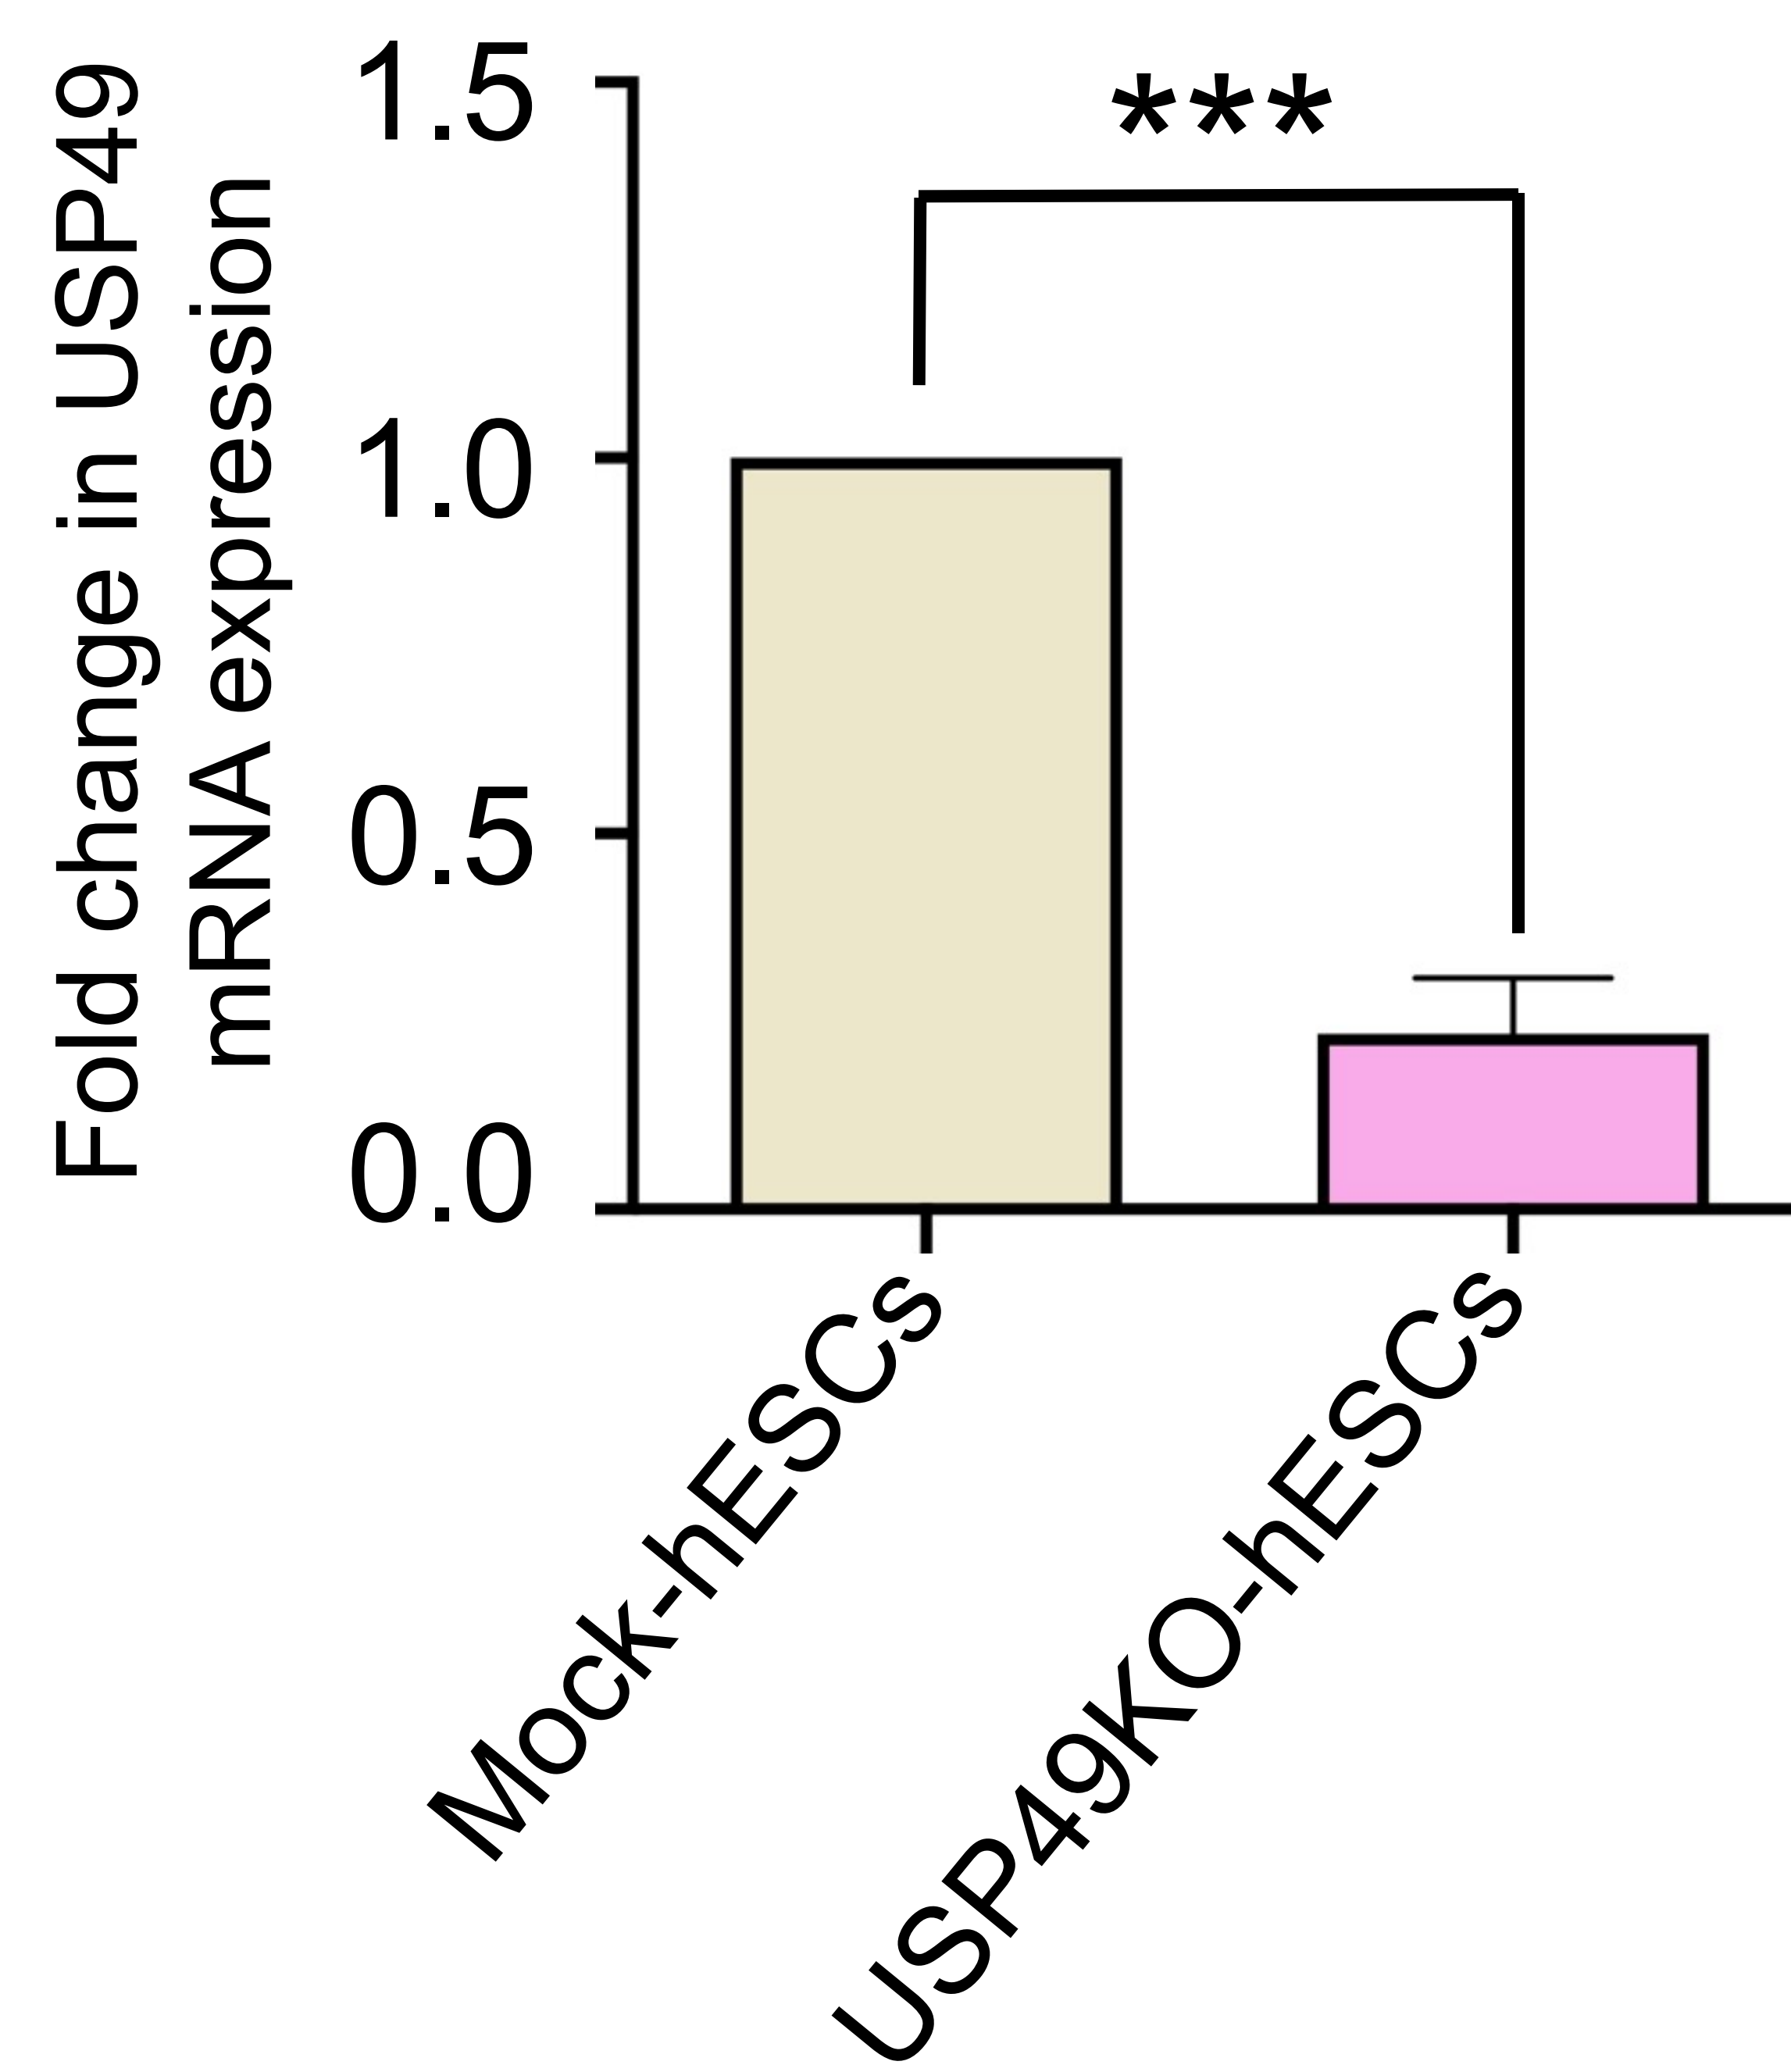

## D

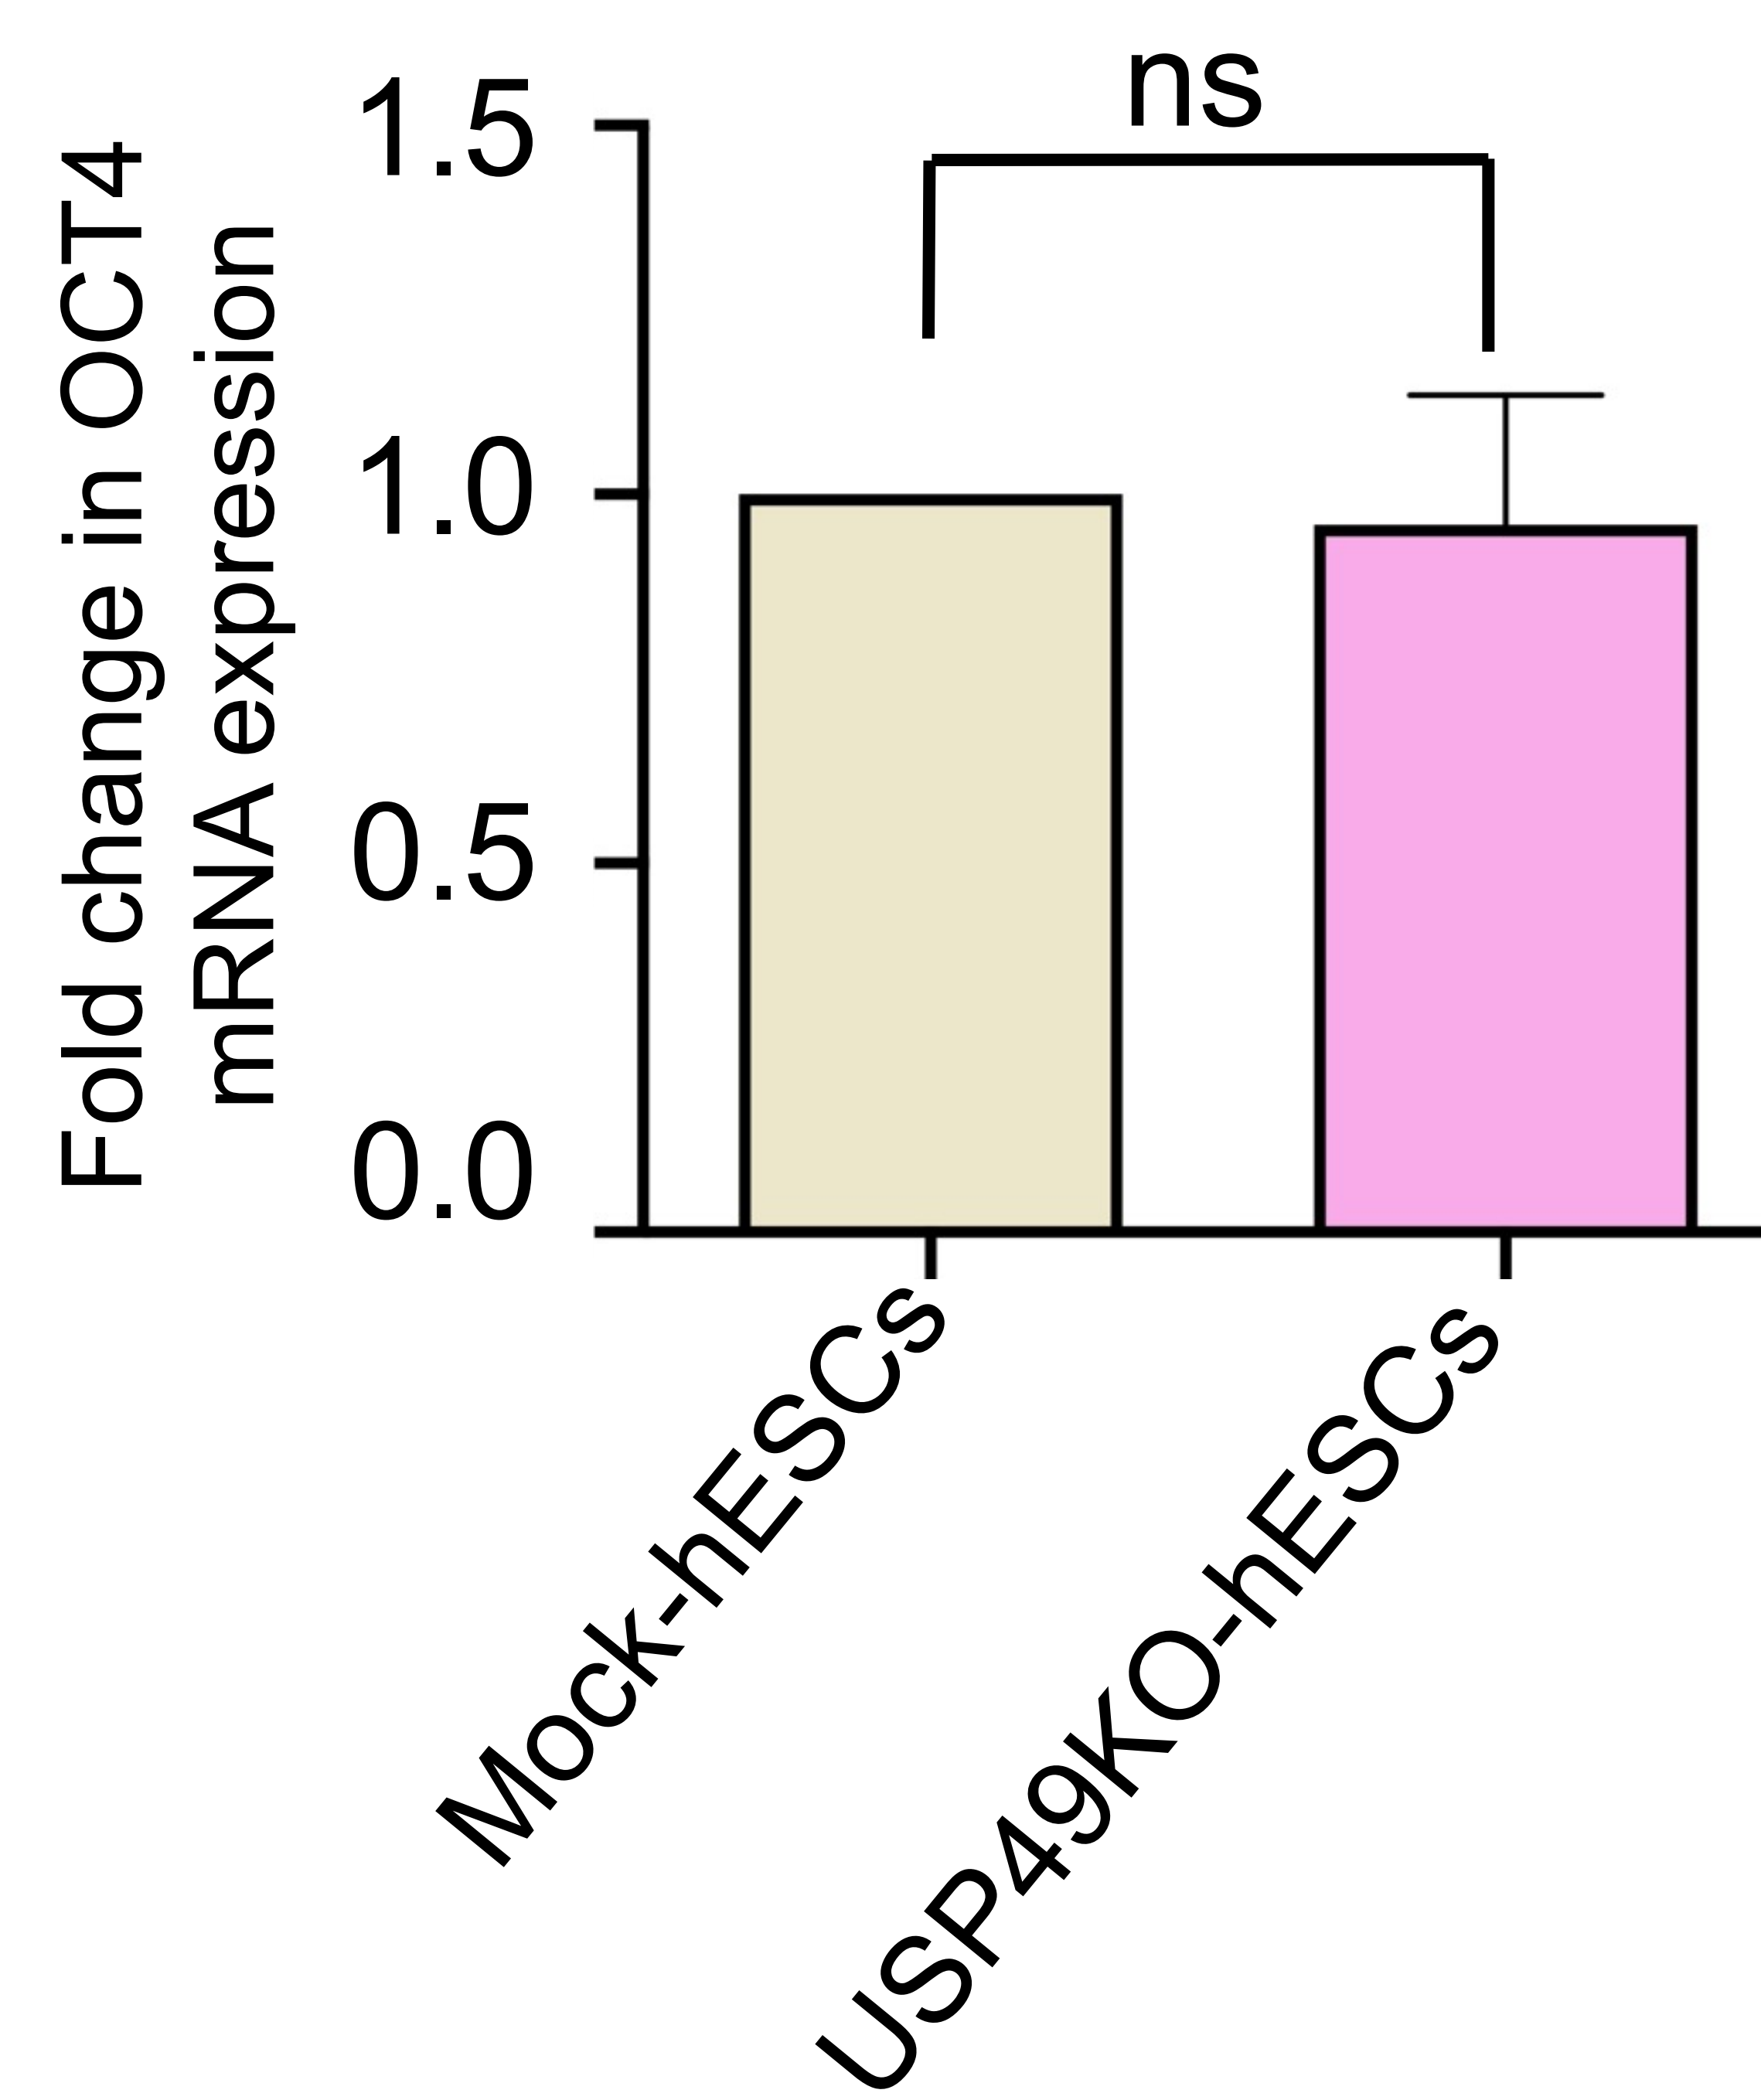

# Supplementary Fig. S12

## A

USP49

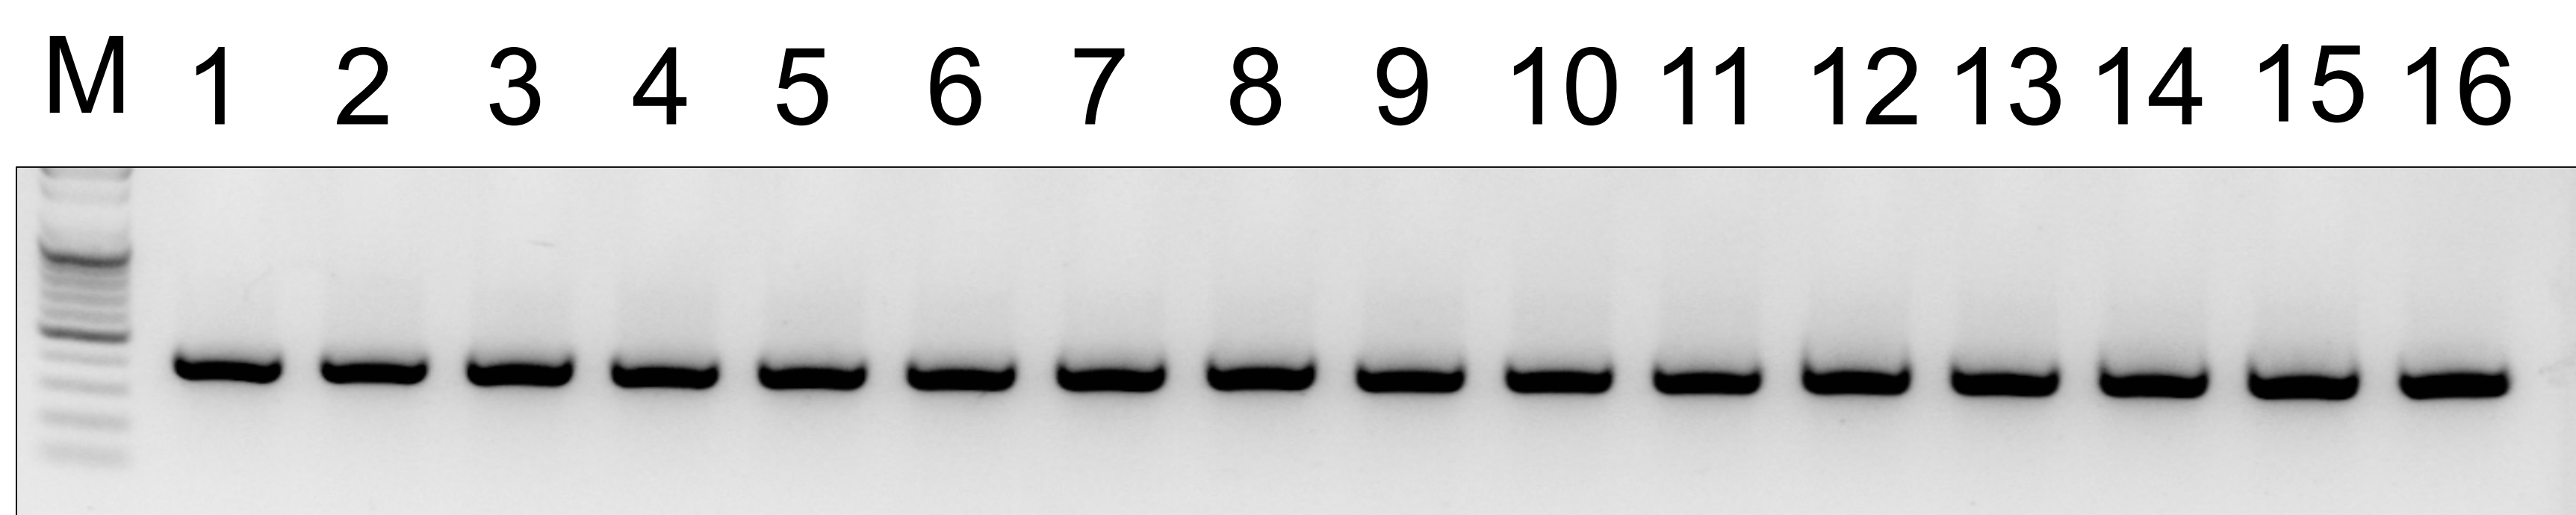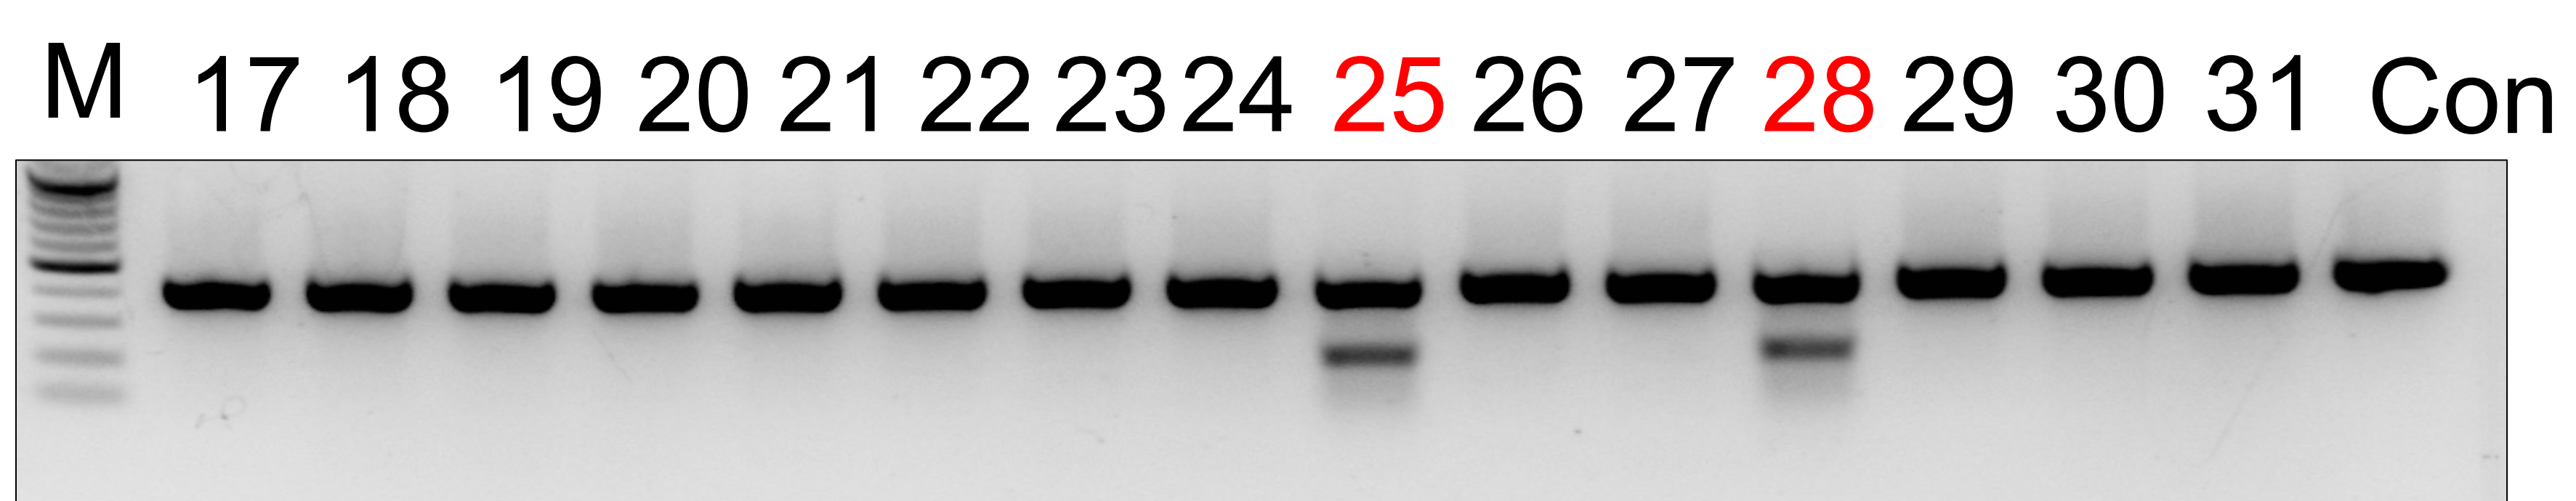

## B

USP49KO-hiPSCs Clone#25:

ACGTGCTCAATGATAACCCAGAGGGGGACCTGA (WT)  
 ACGTGCTCAATGATA-----ACCTGA (-12) (X2) (In-frame mutation)  
 ACGTGCTCAATGATAACCC--AGGGGGACCTGA (-2) (X1) (out-of-frame mutation)

USP49KO-hiPSCs Clone#28

ACGTGCTCAATGATAACCCAGAGGGGGACCTGA (WT)  
 ACGTGCTCAATGATAACCCA-AGGGGGACCTGA (-1) (X9) (out-of-frame mutation)  
 ACGTGCTCAATGATAACCC--AGGGGGACCTGA (-2) (X7) (out-of-frame mutation)

## C

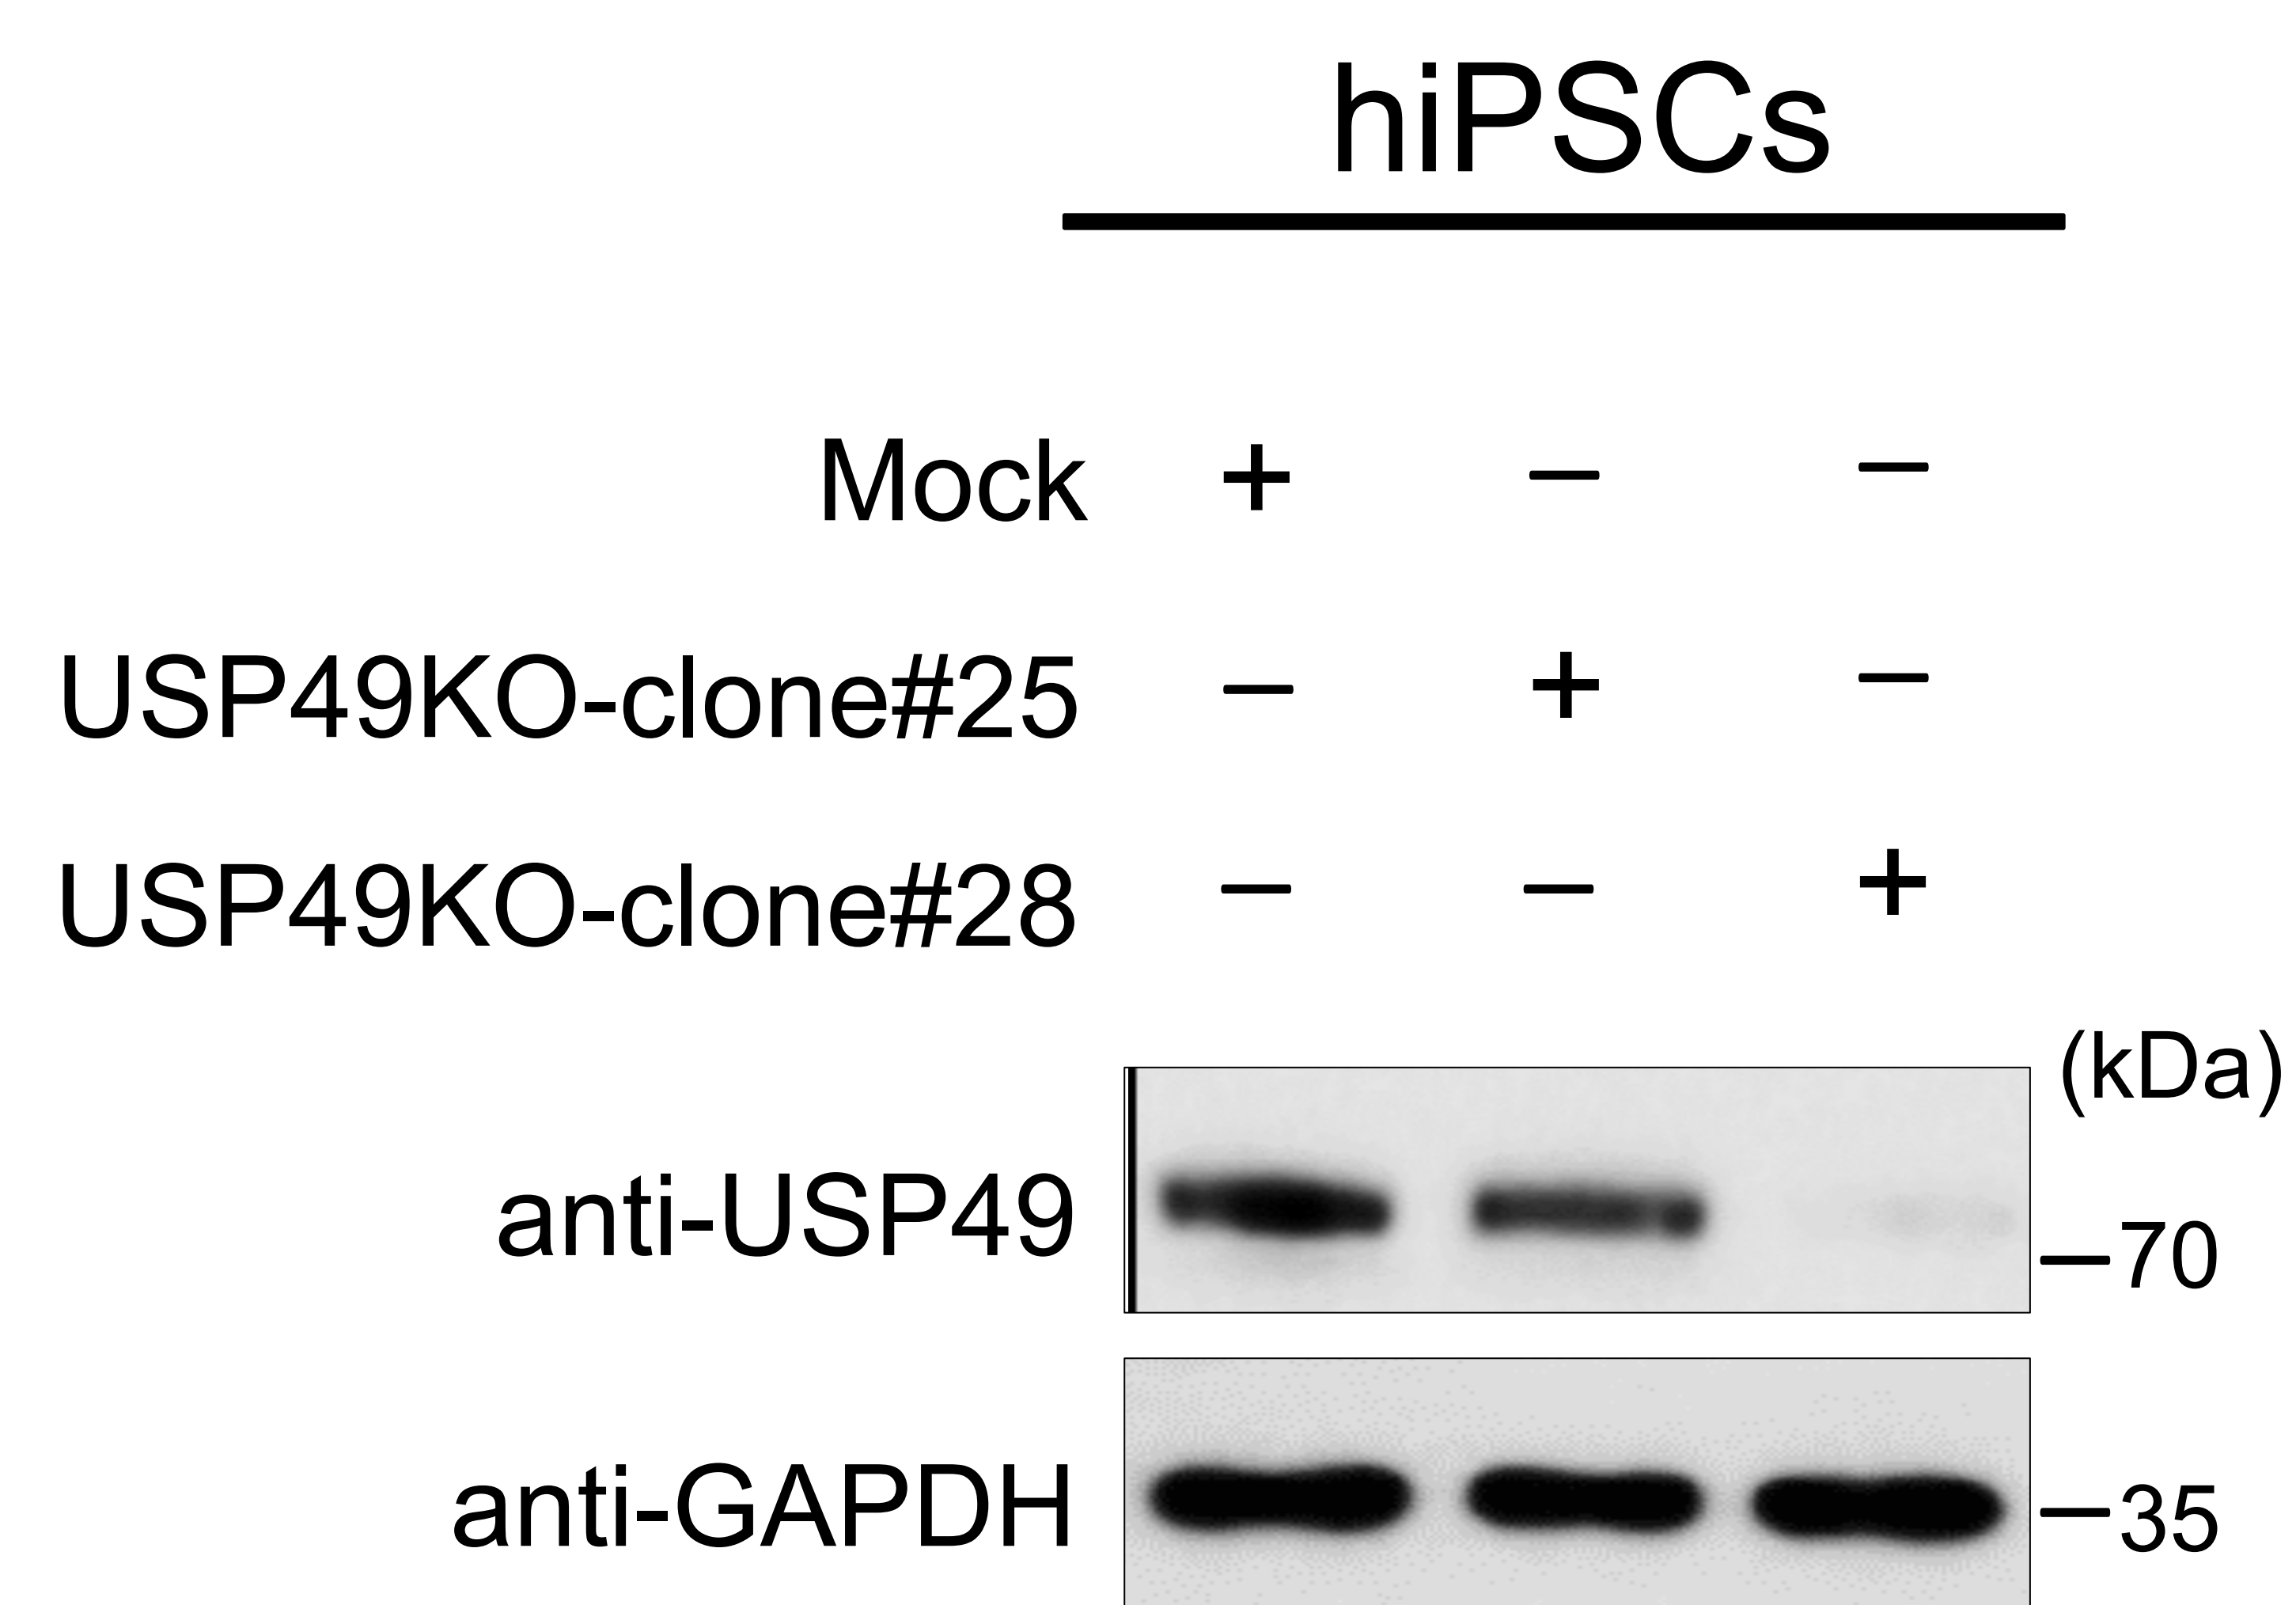

## D

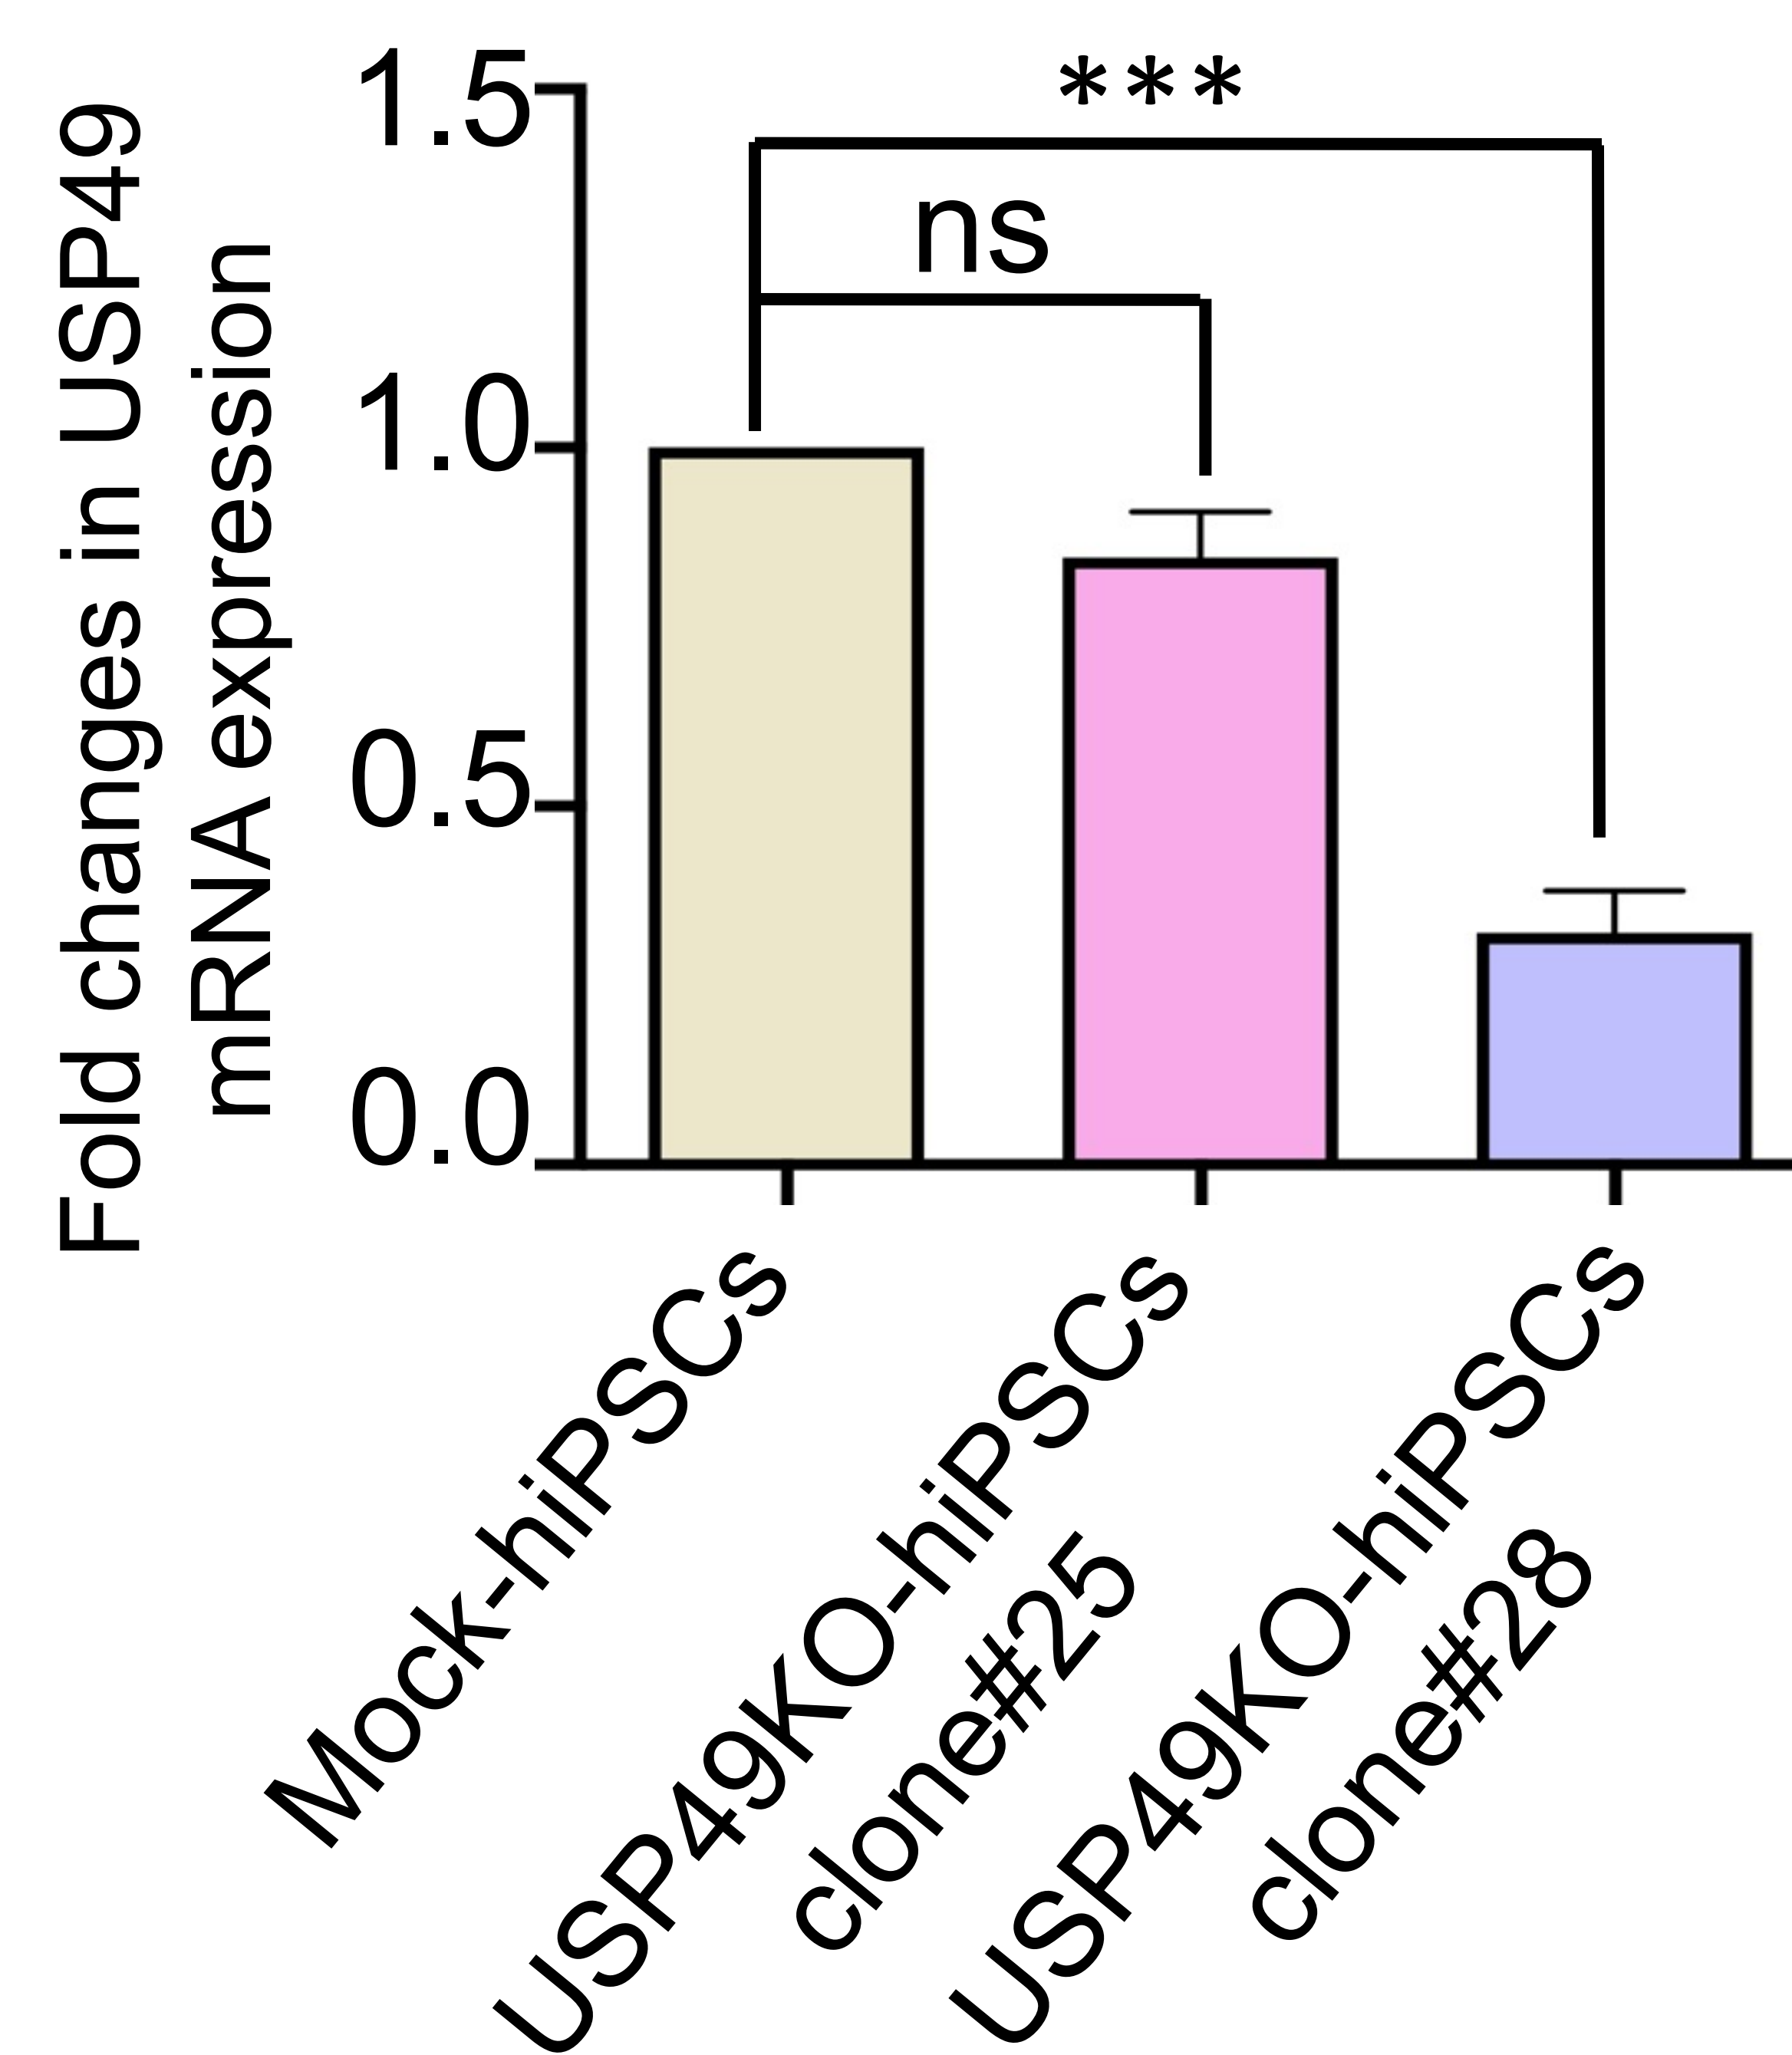

## E

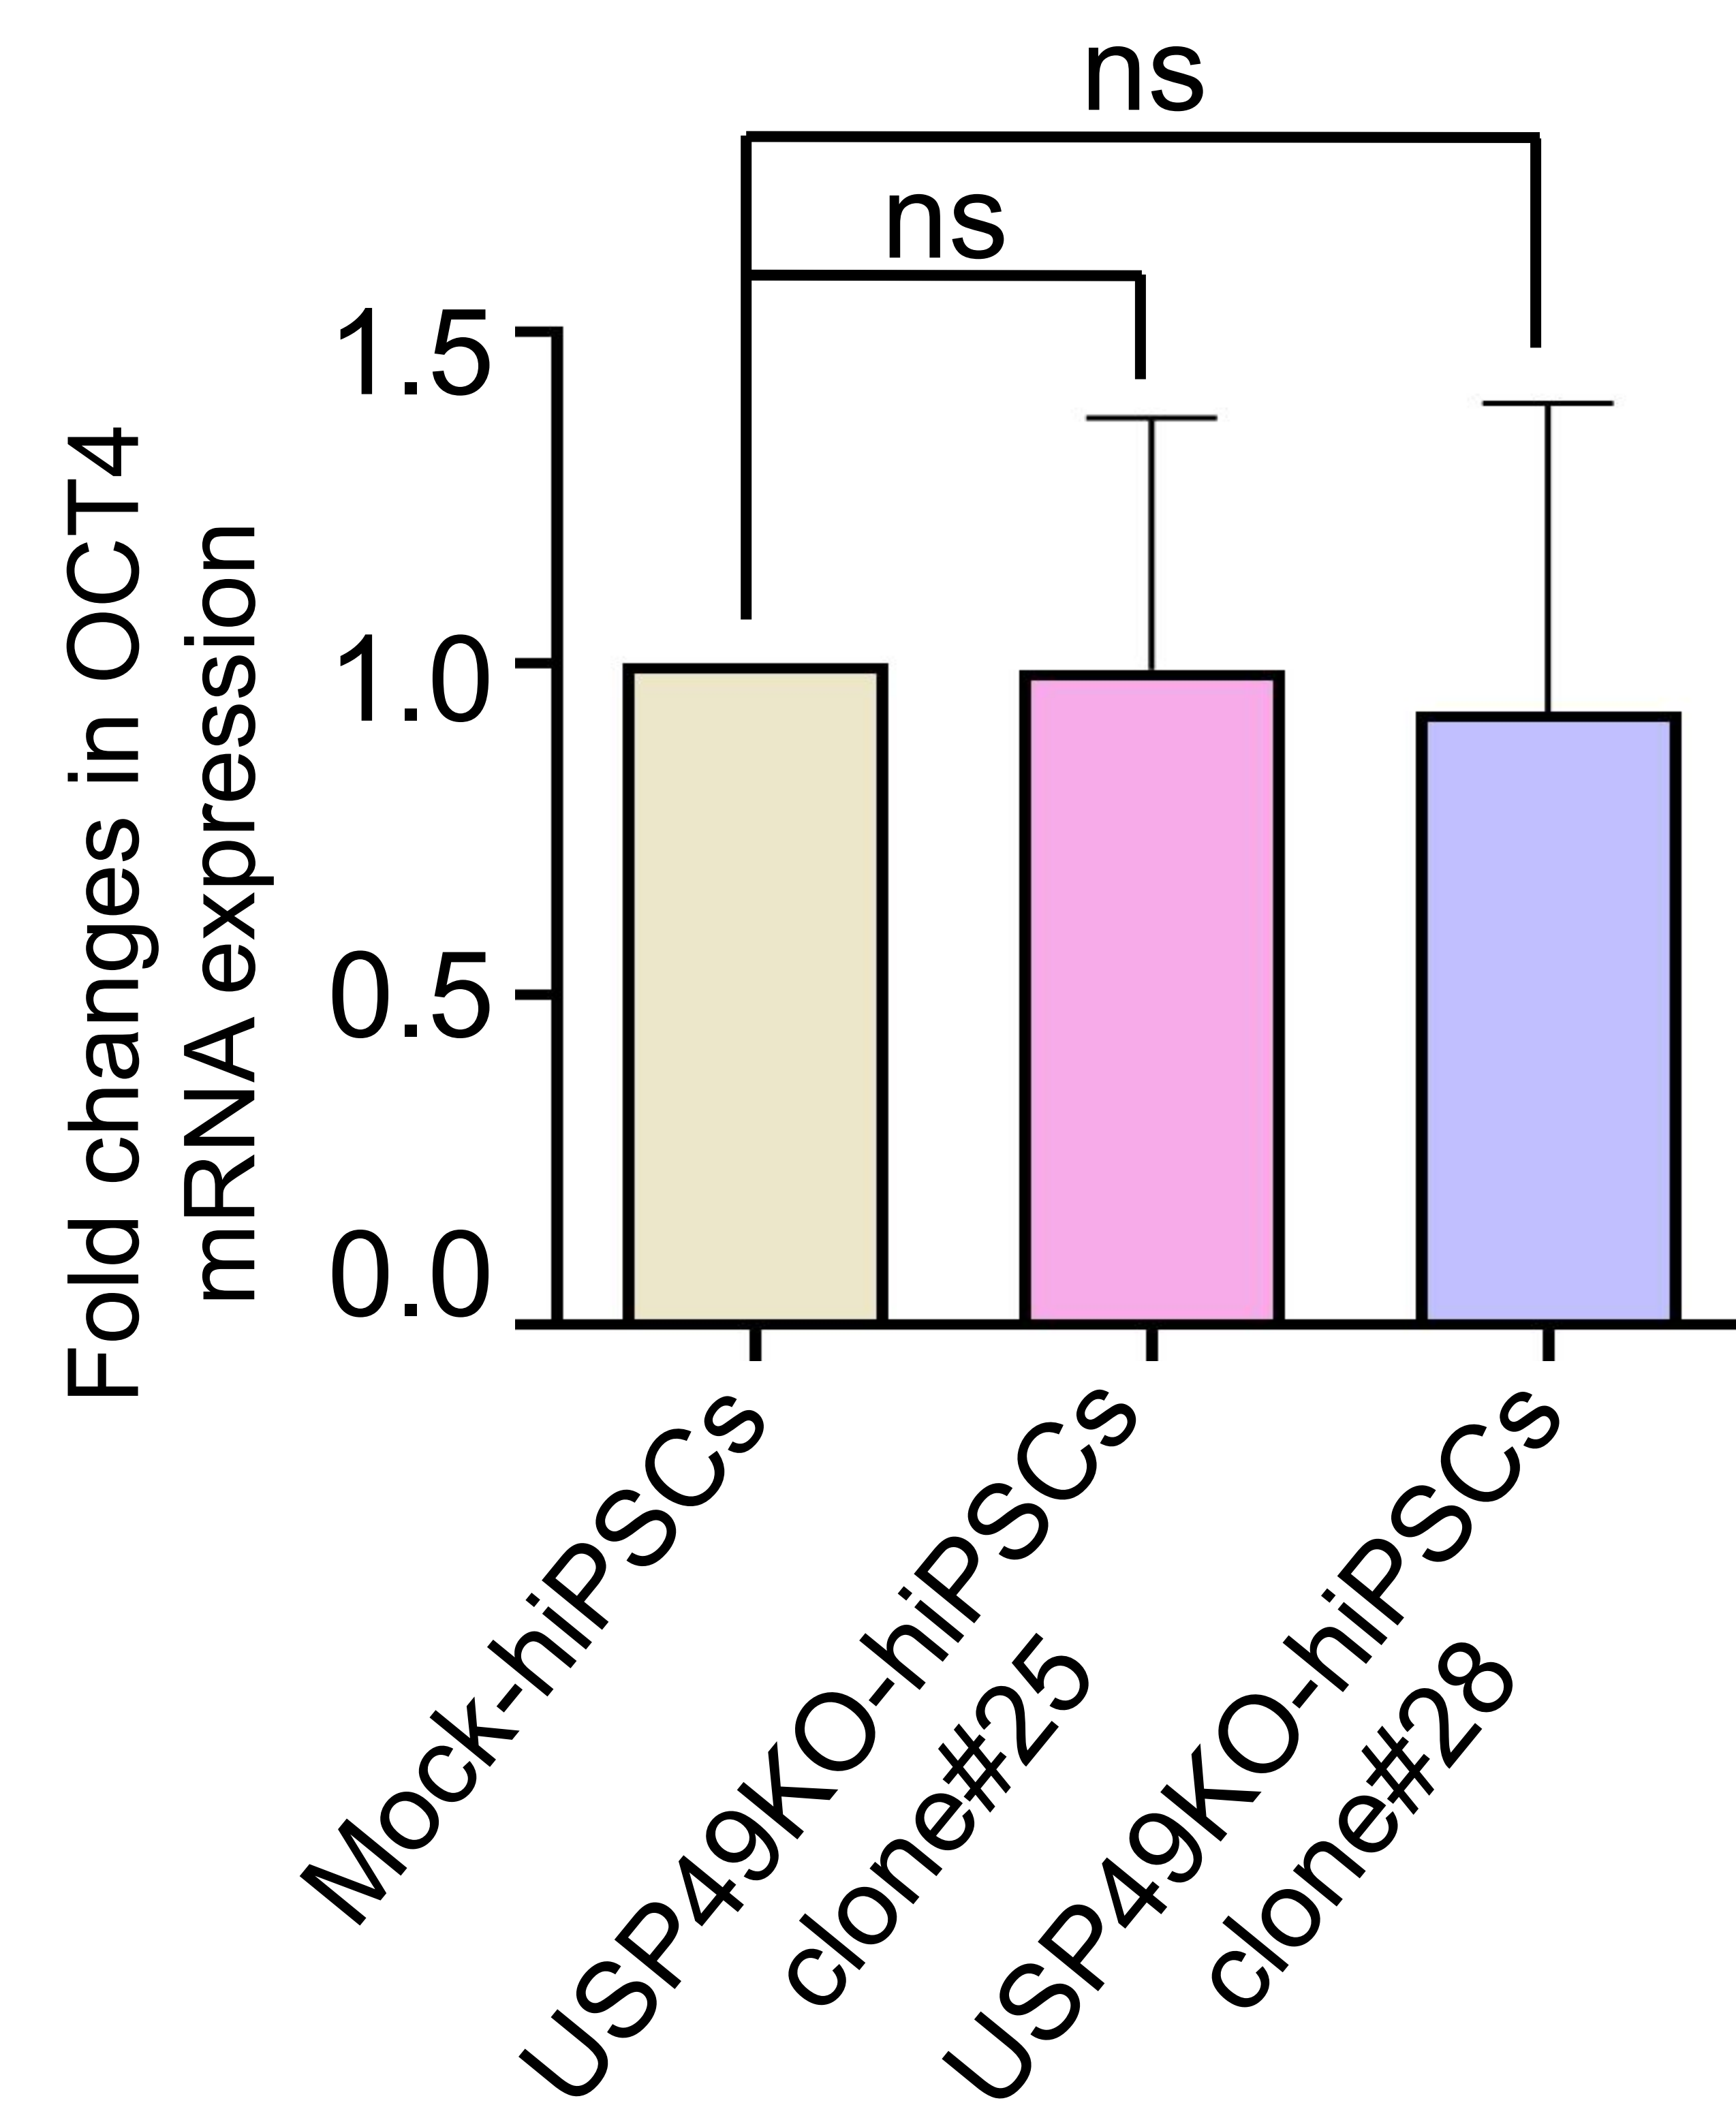

## F

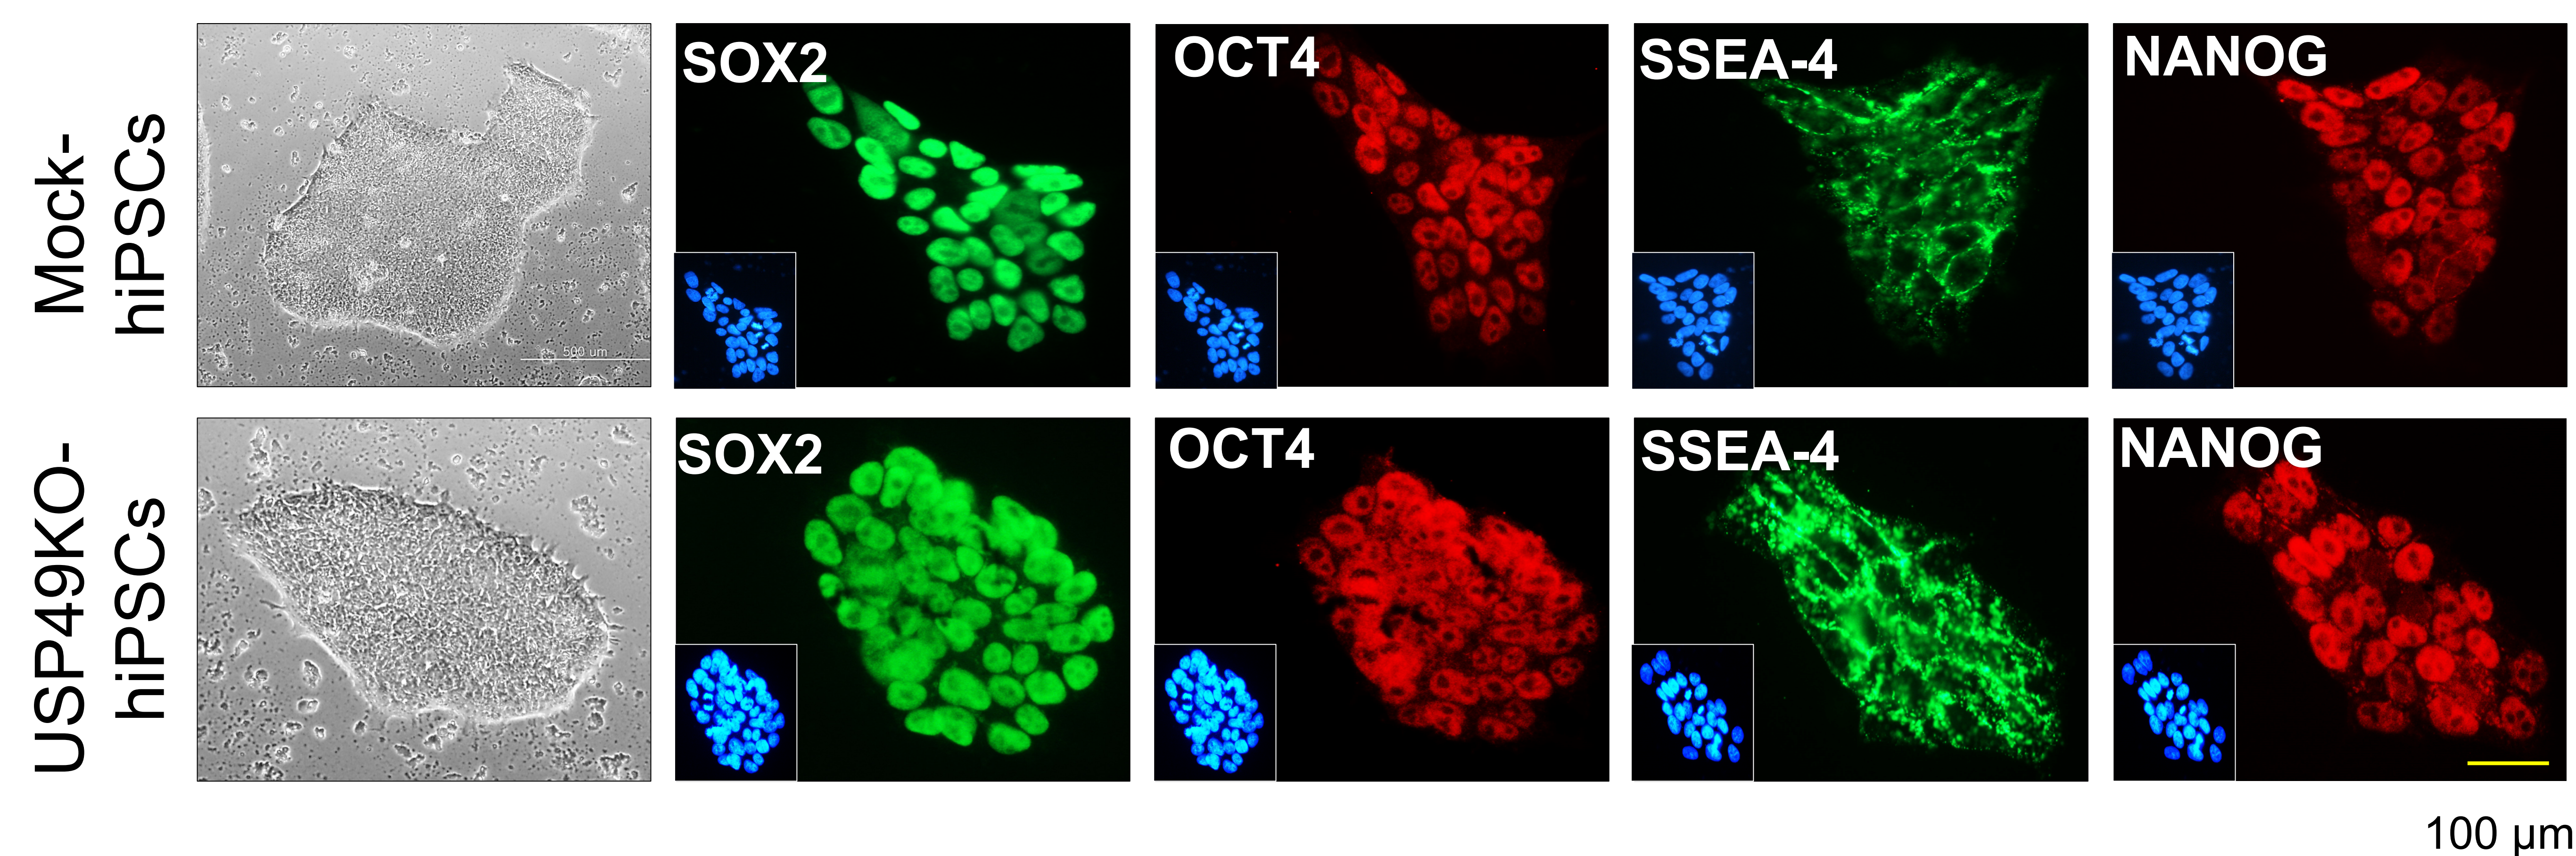

## G

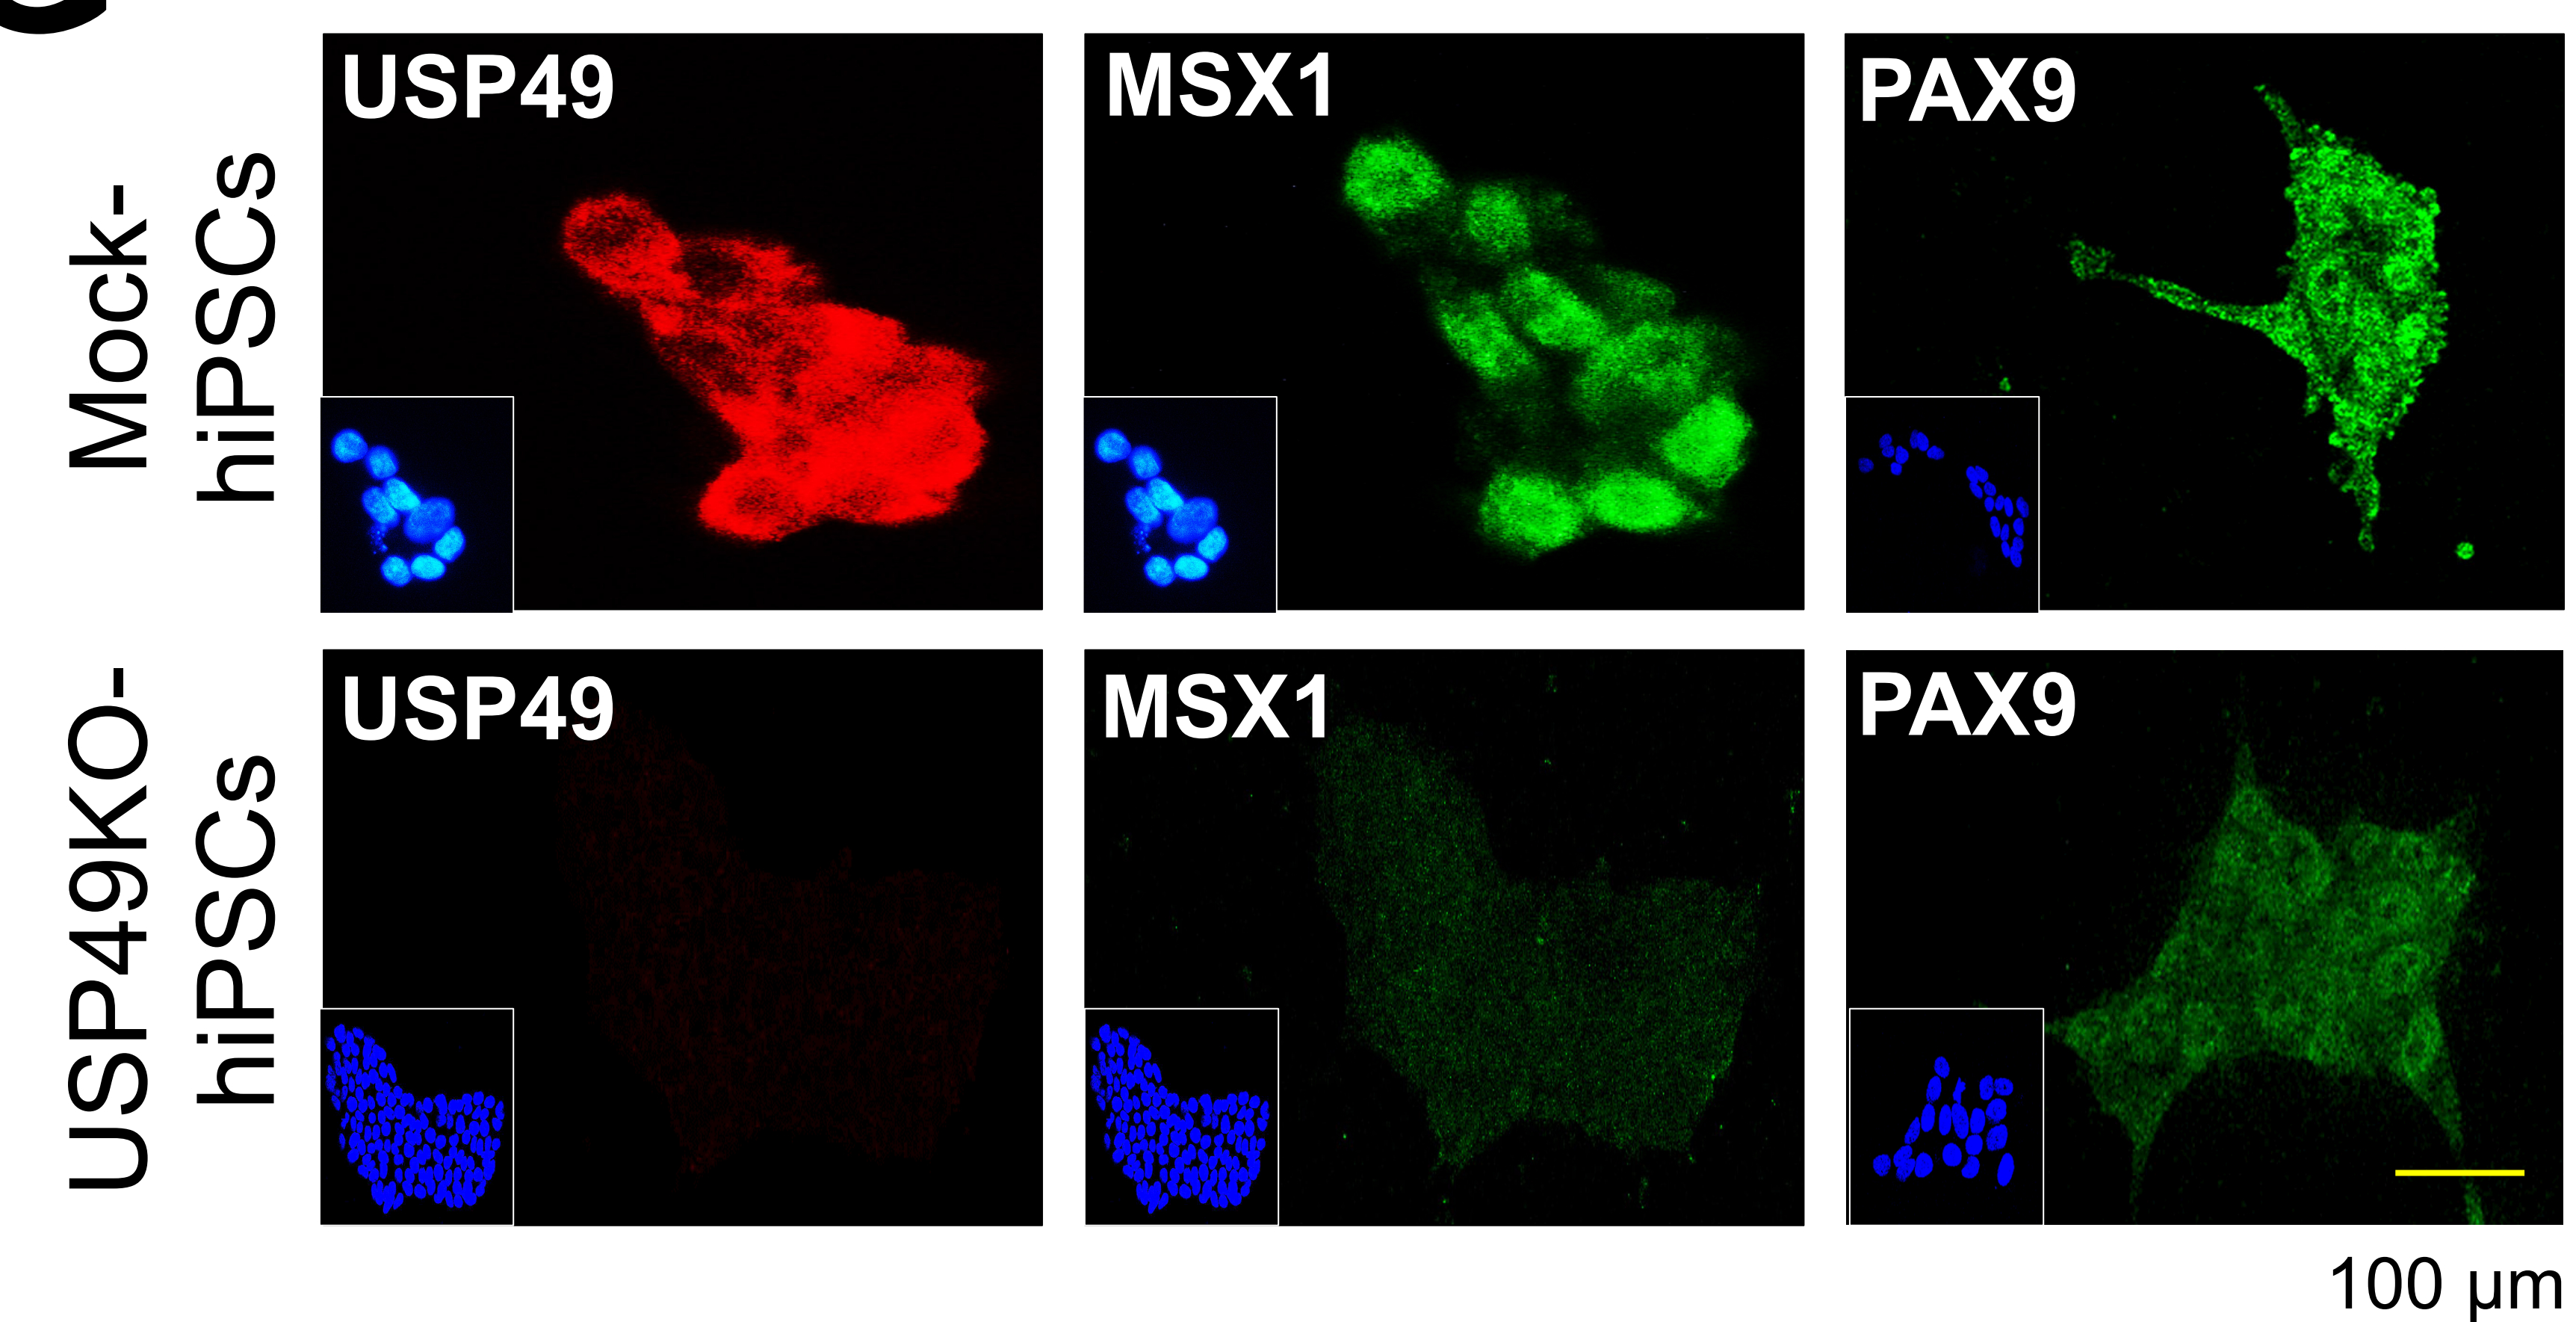

# Supplementary Fig. S13

## A

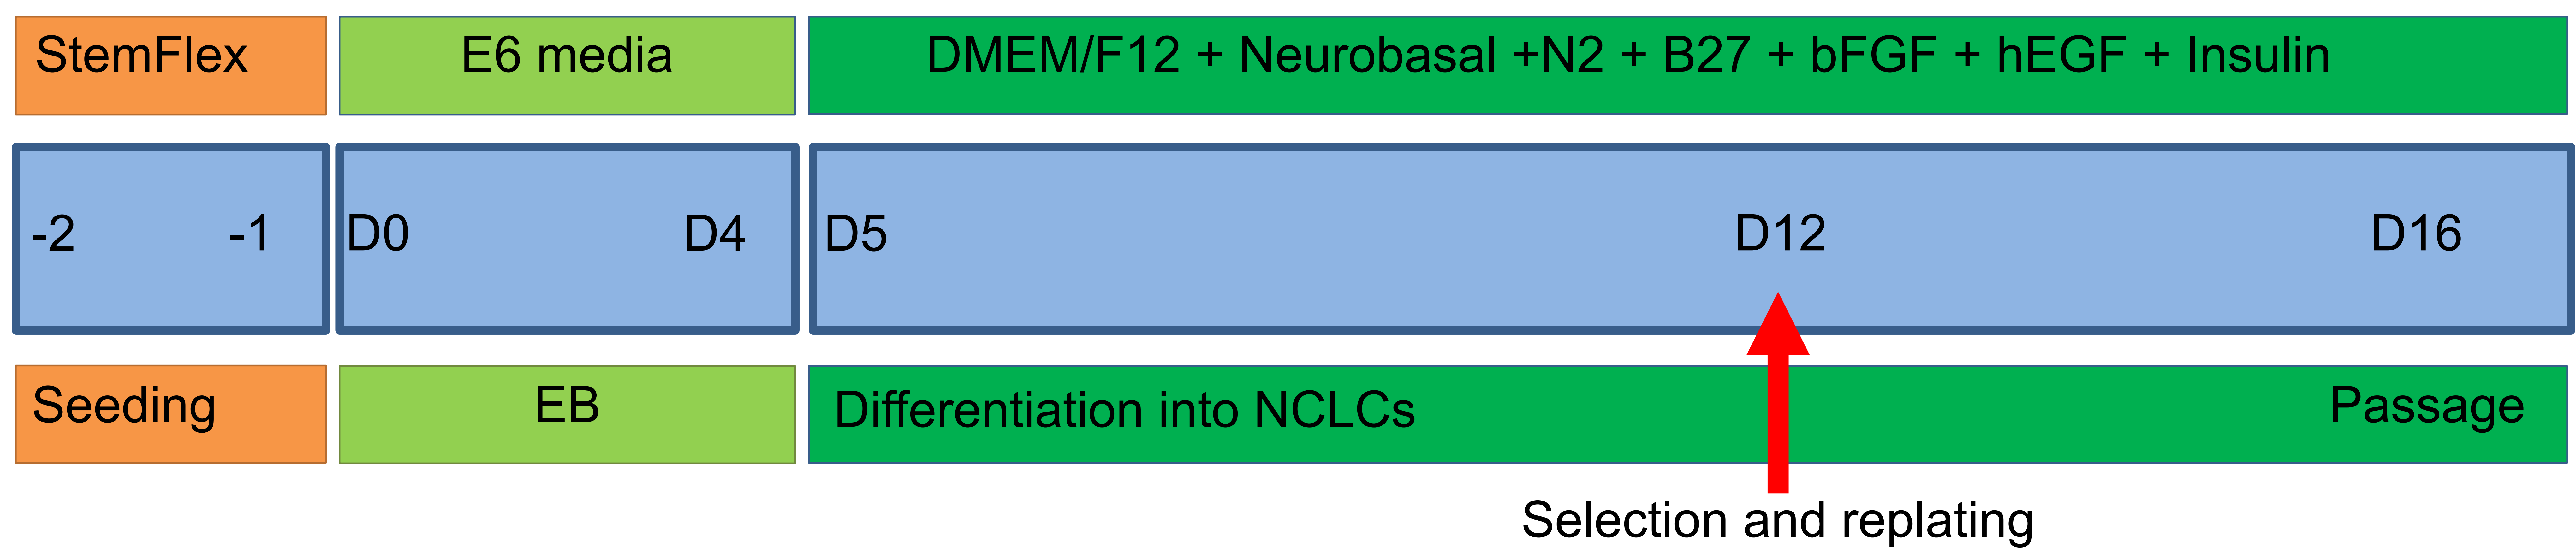

## B

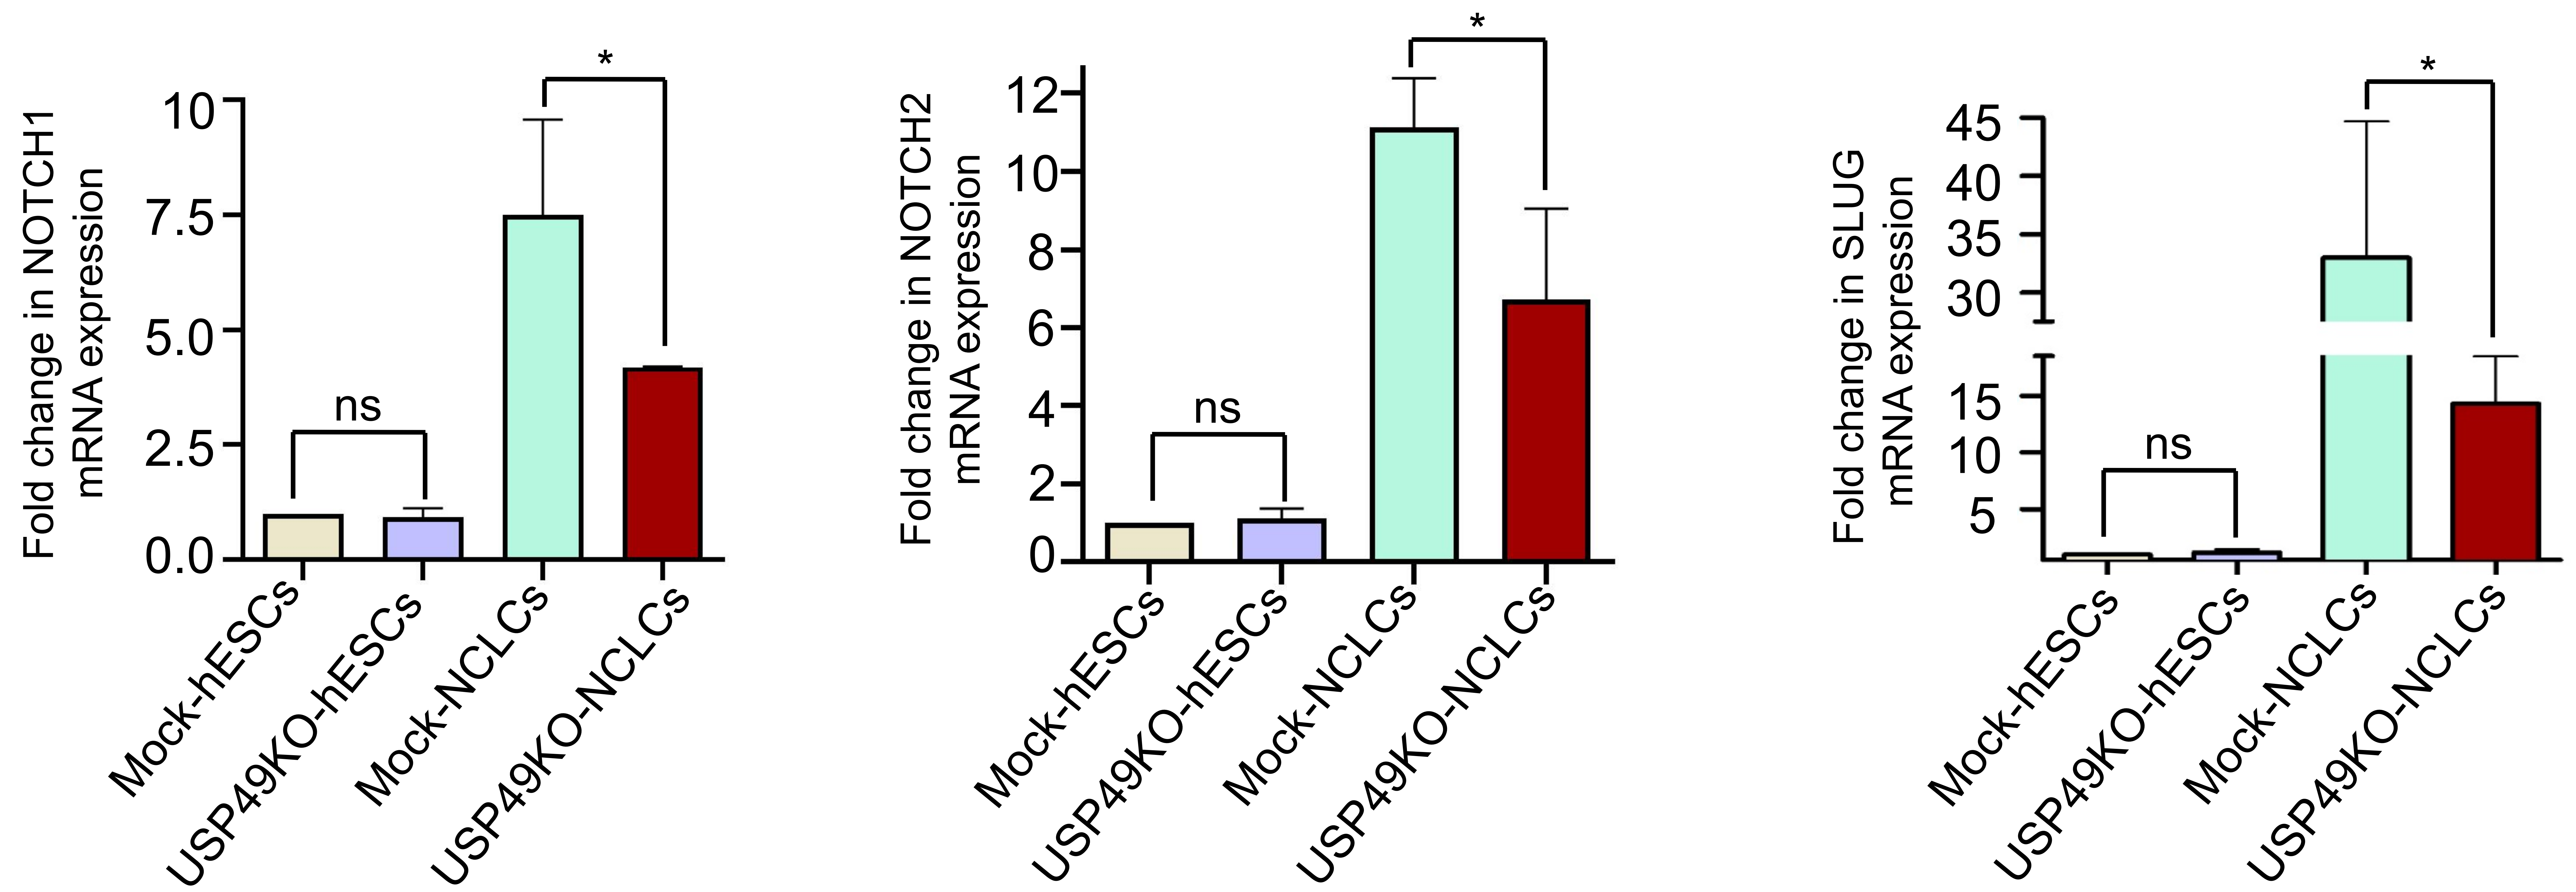

# Supplementary Fig. S14

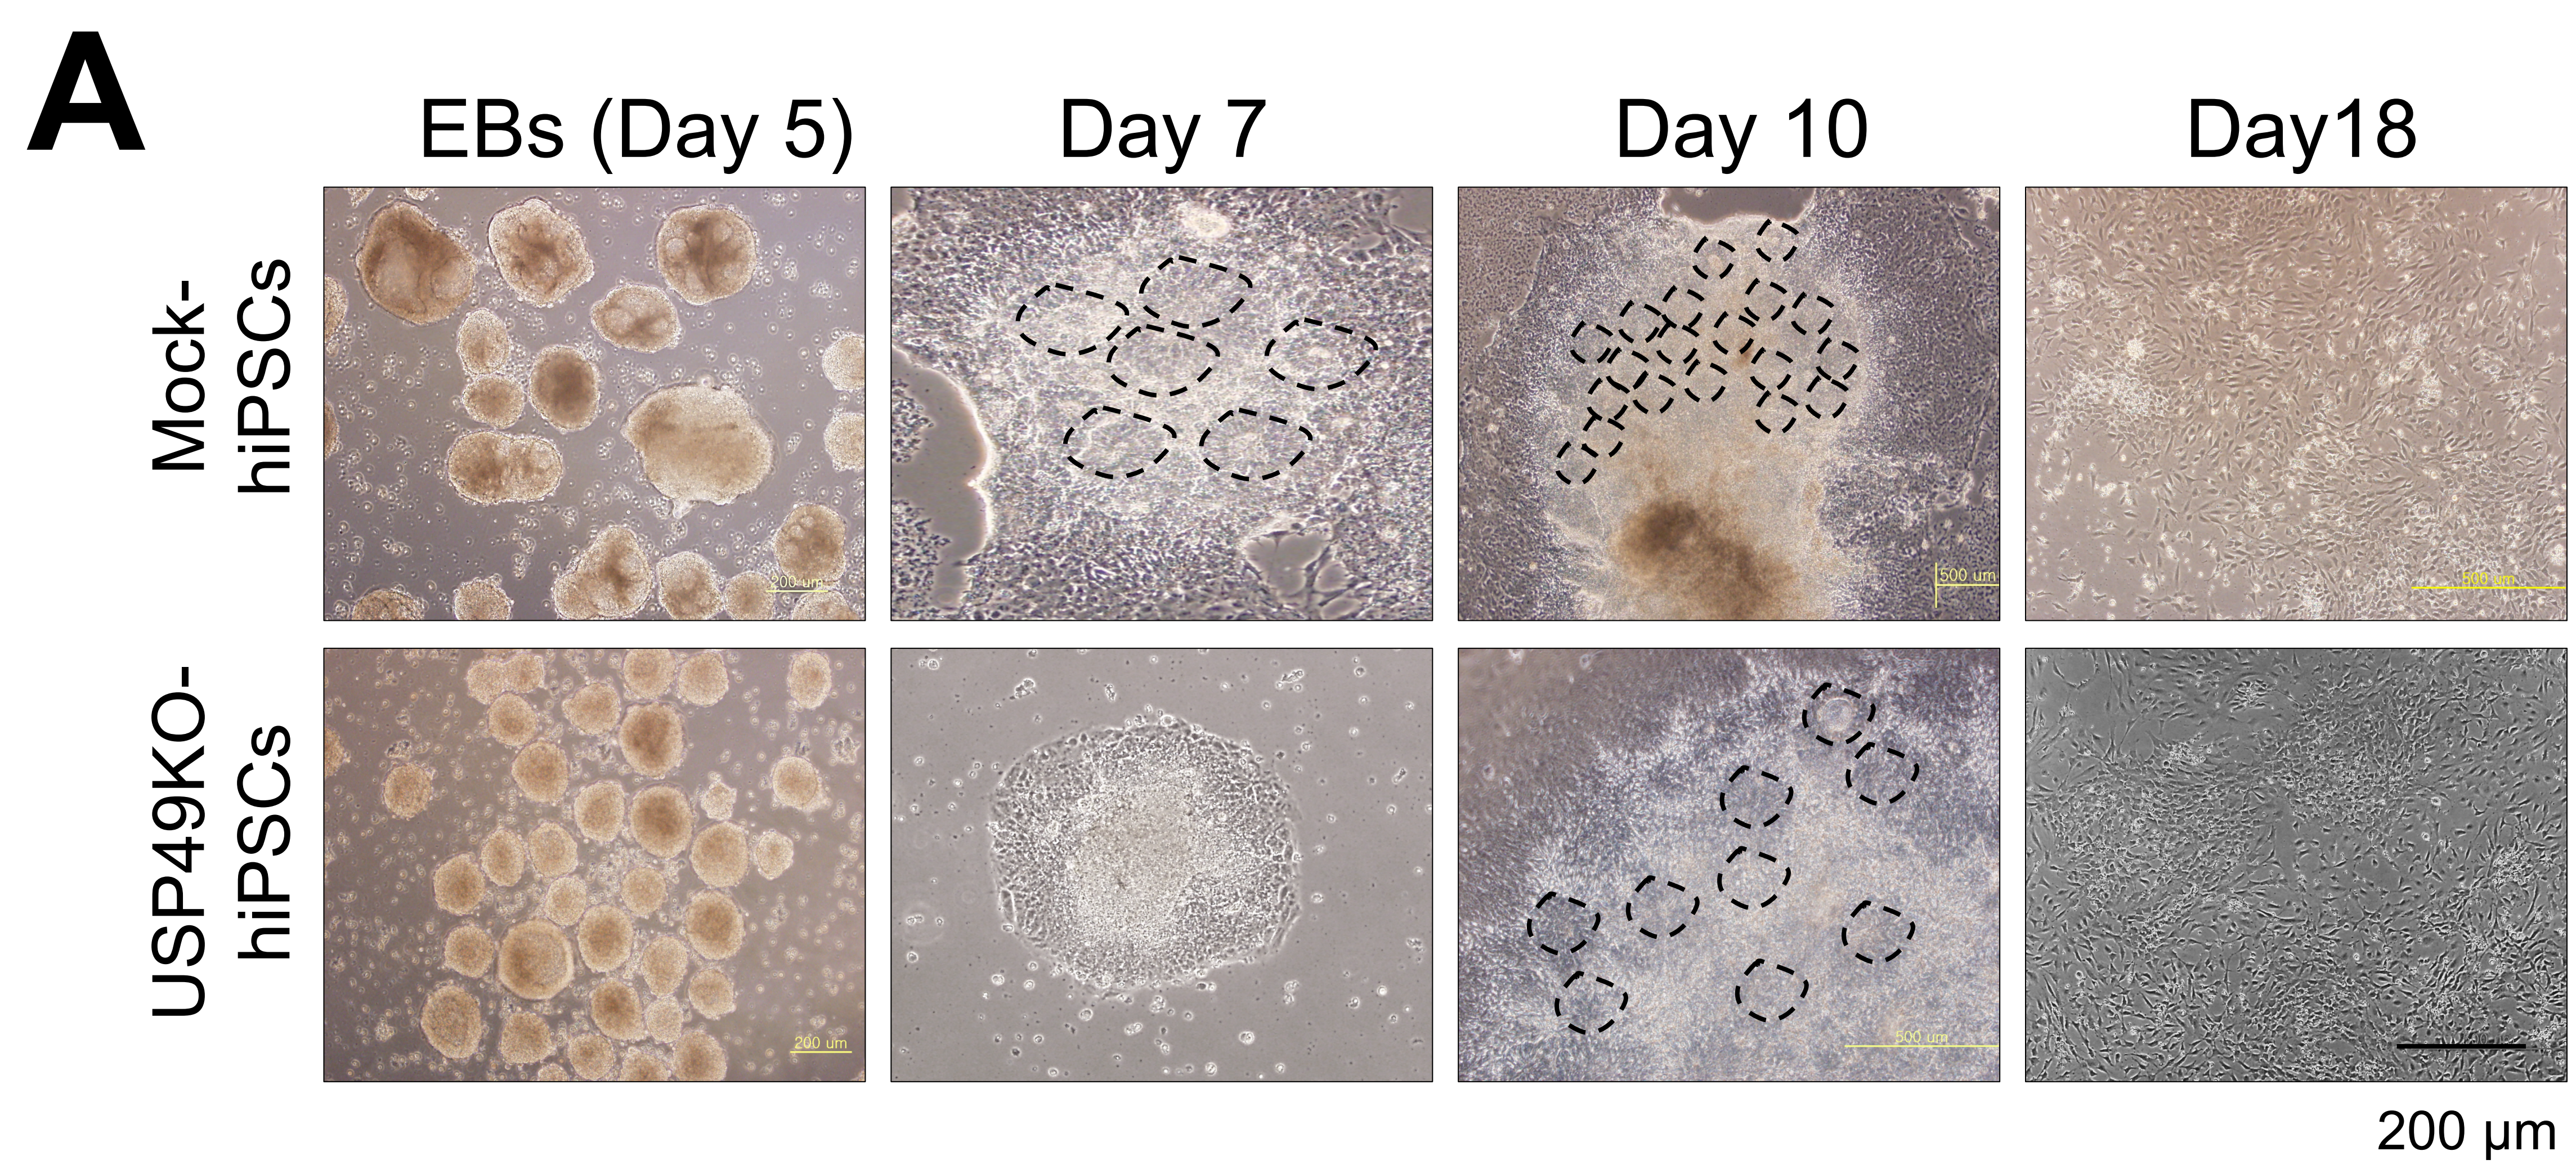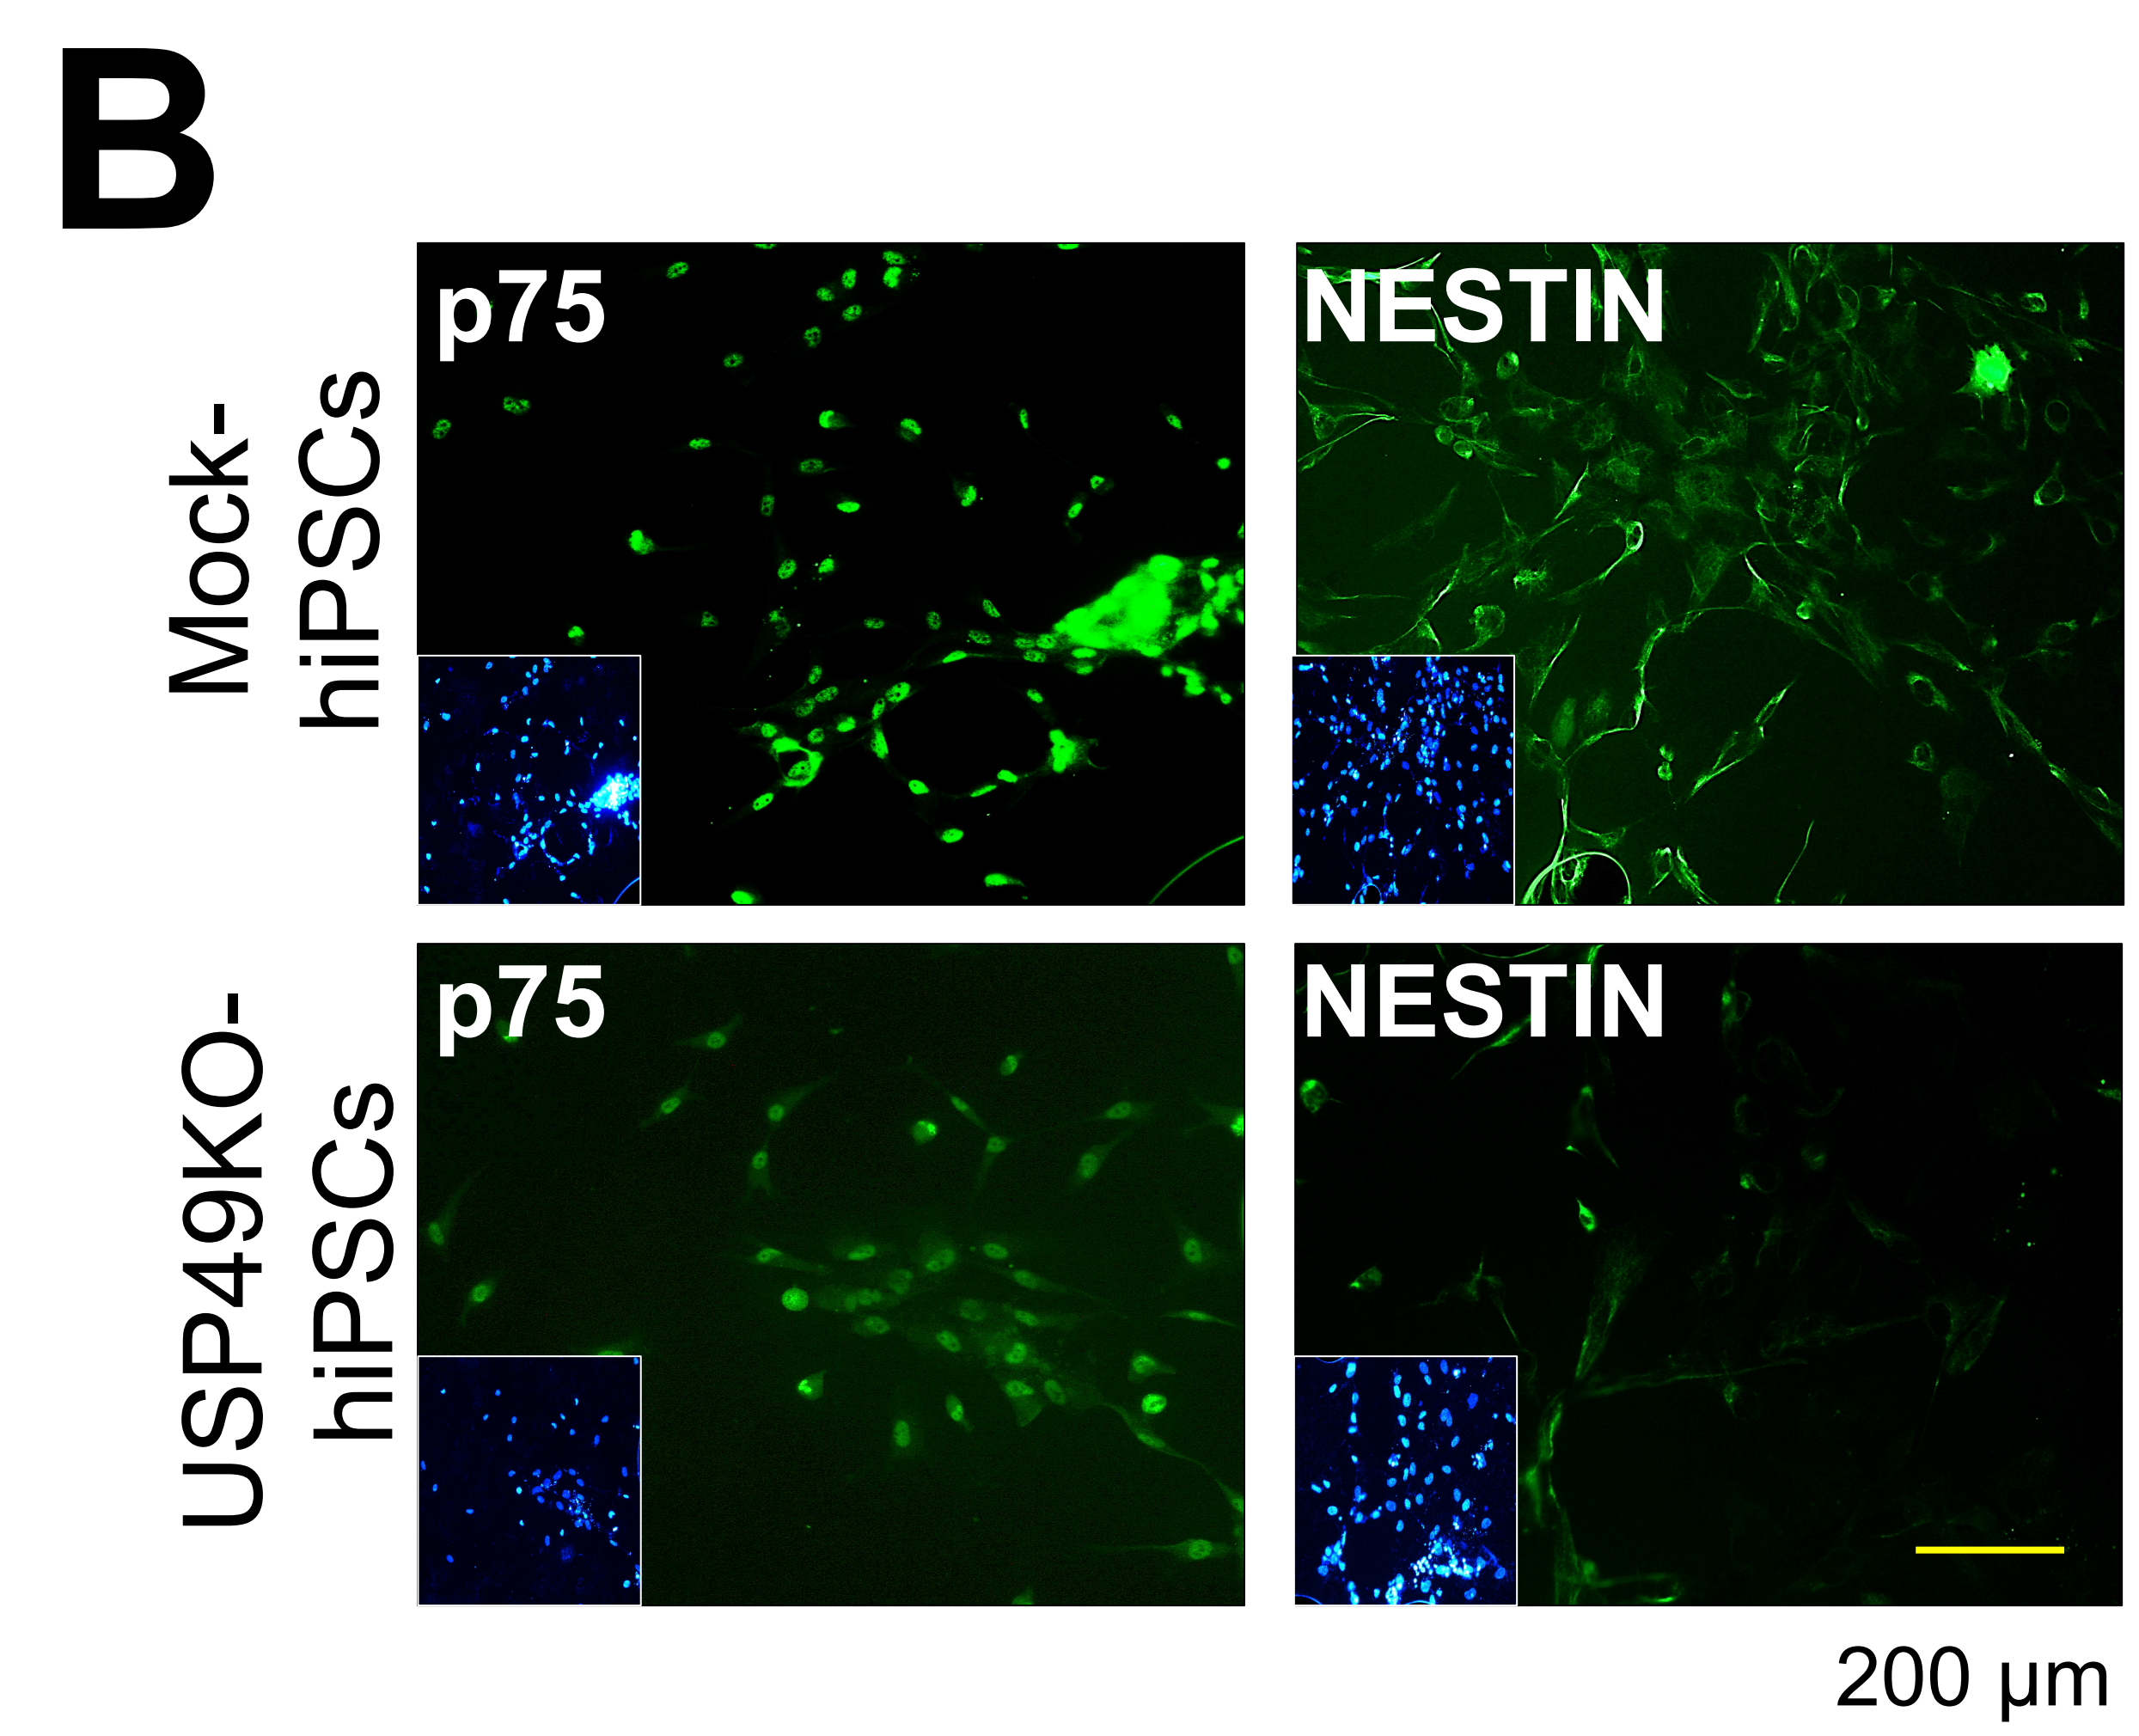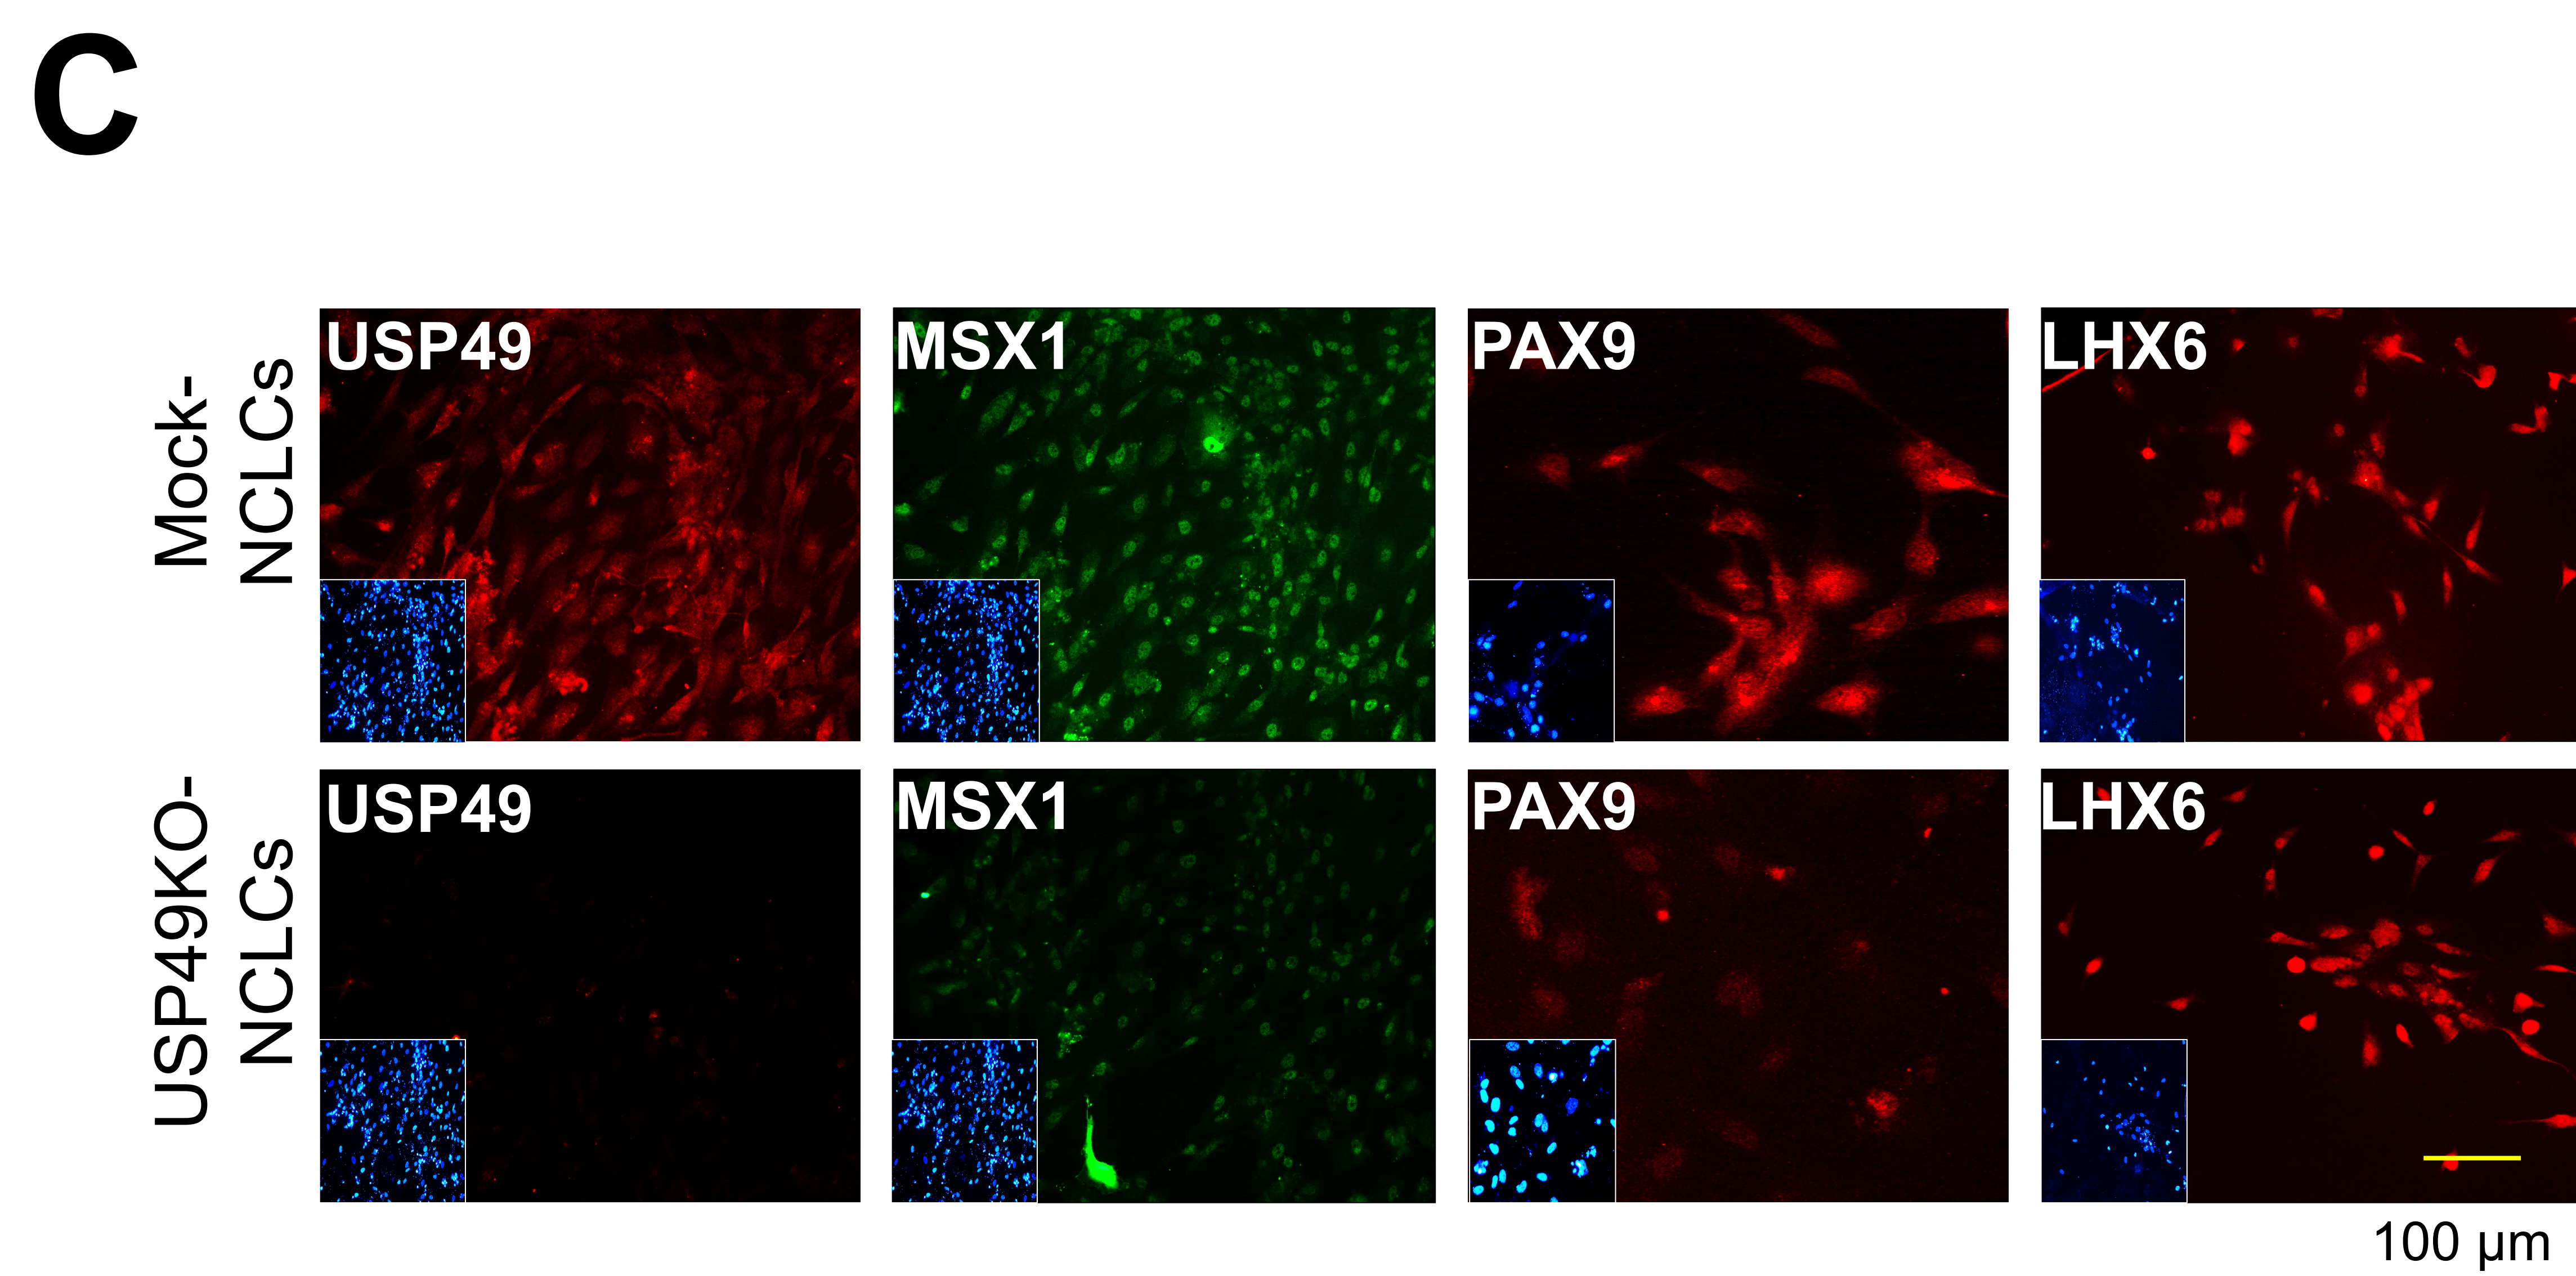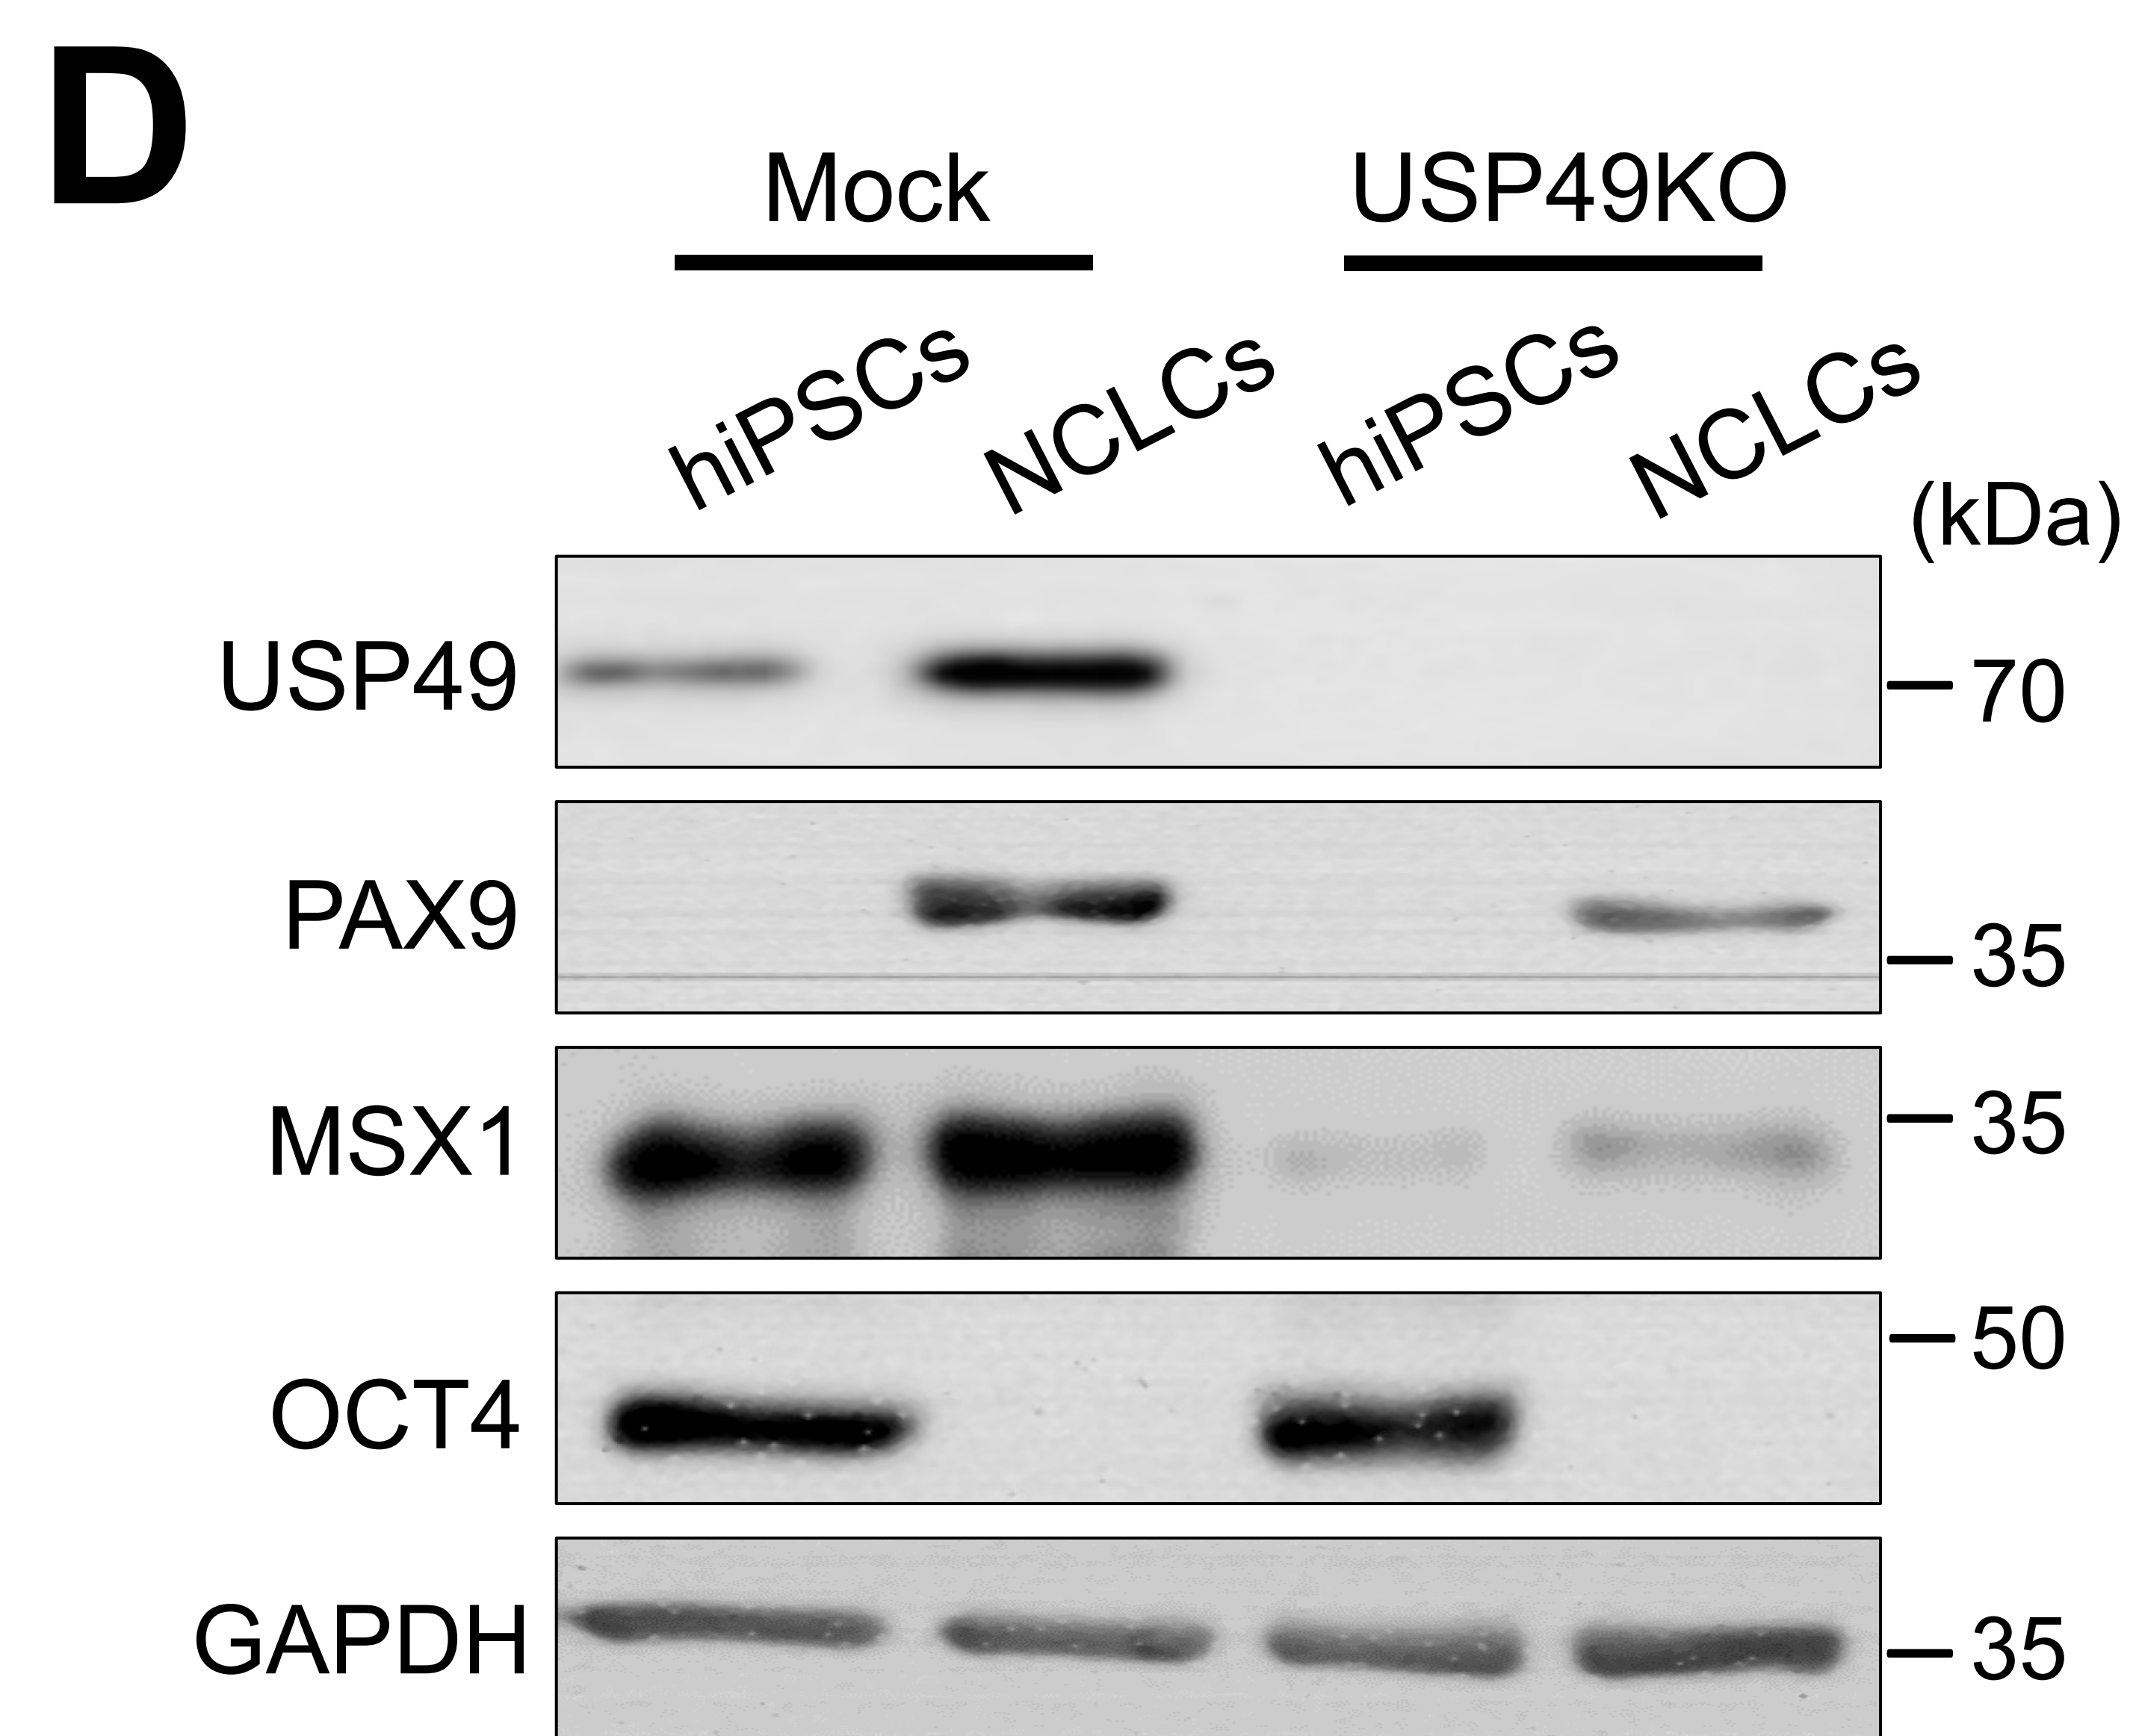

# Supplementary Fig. S15

Mock

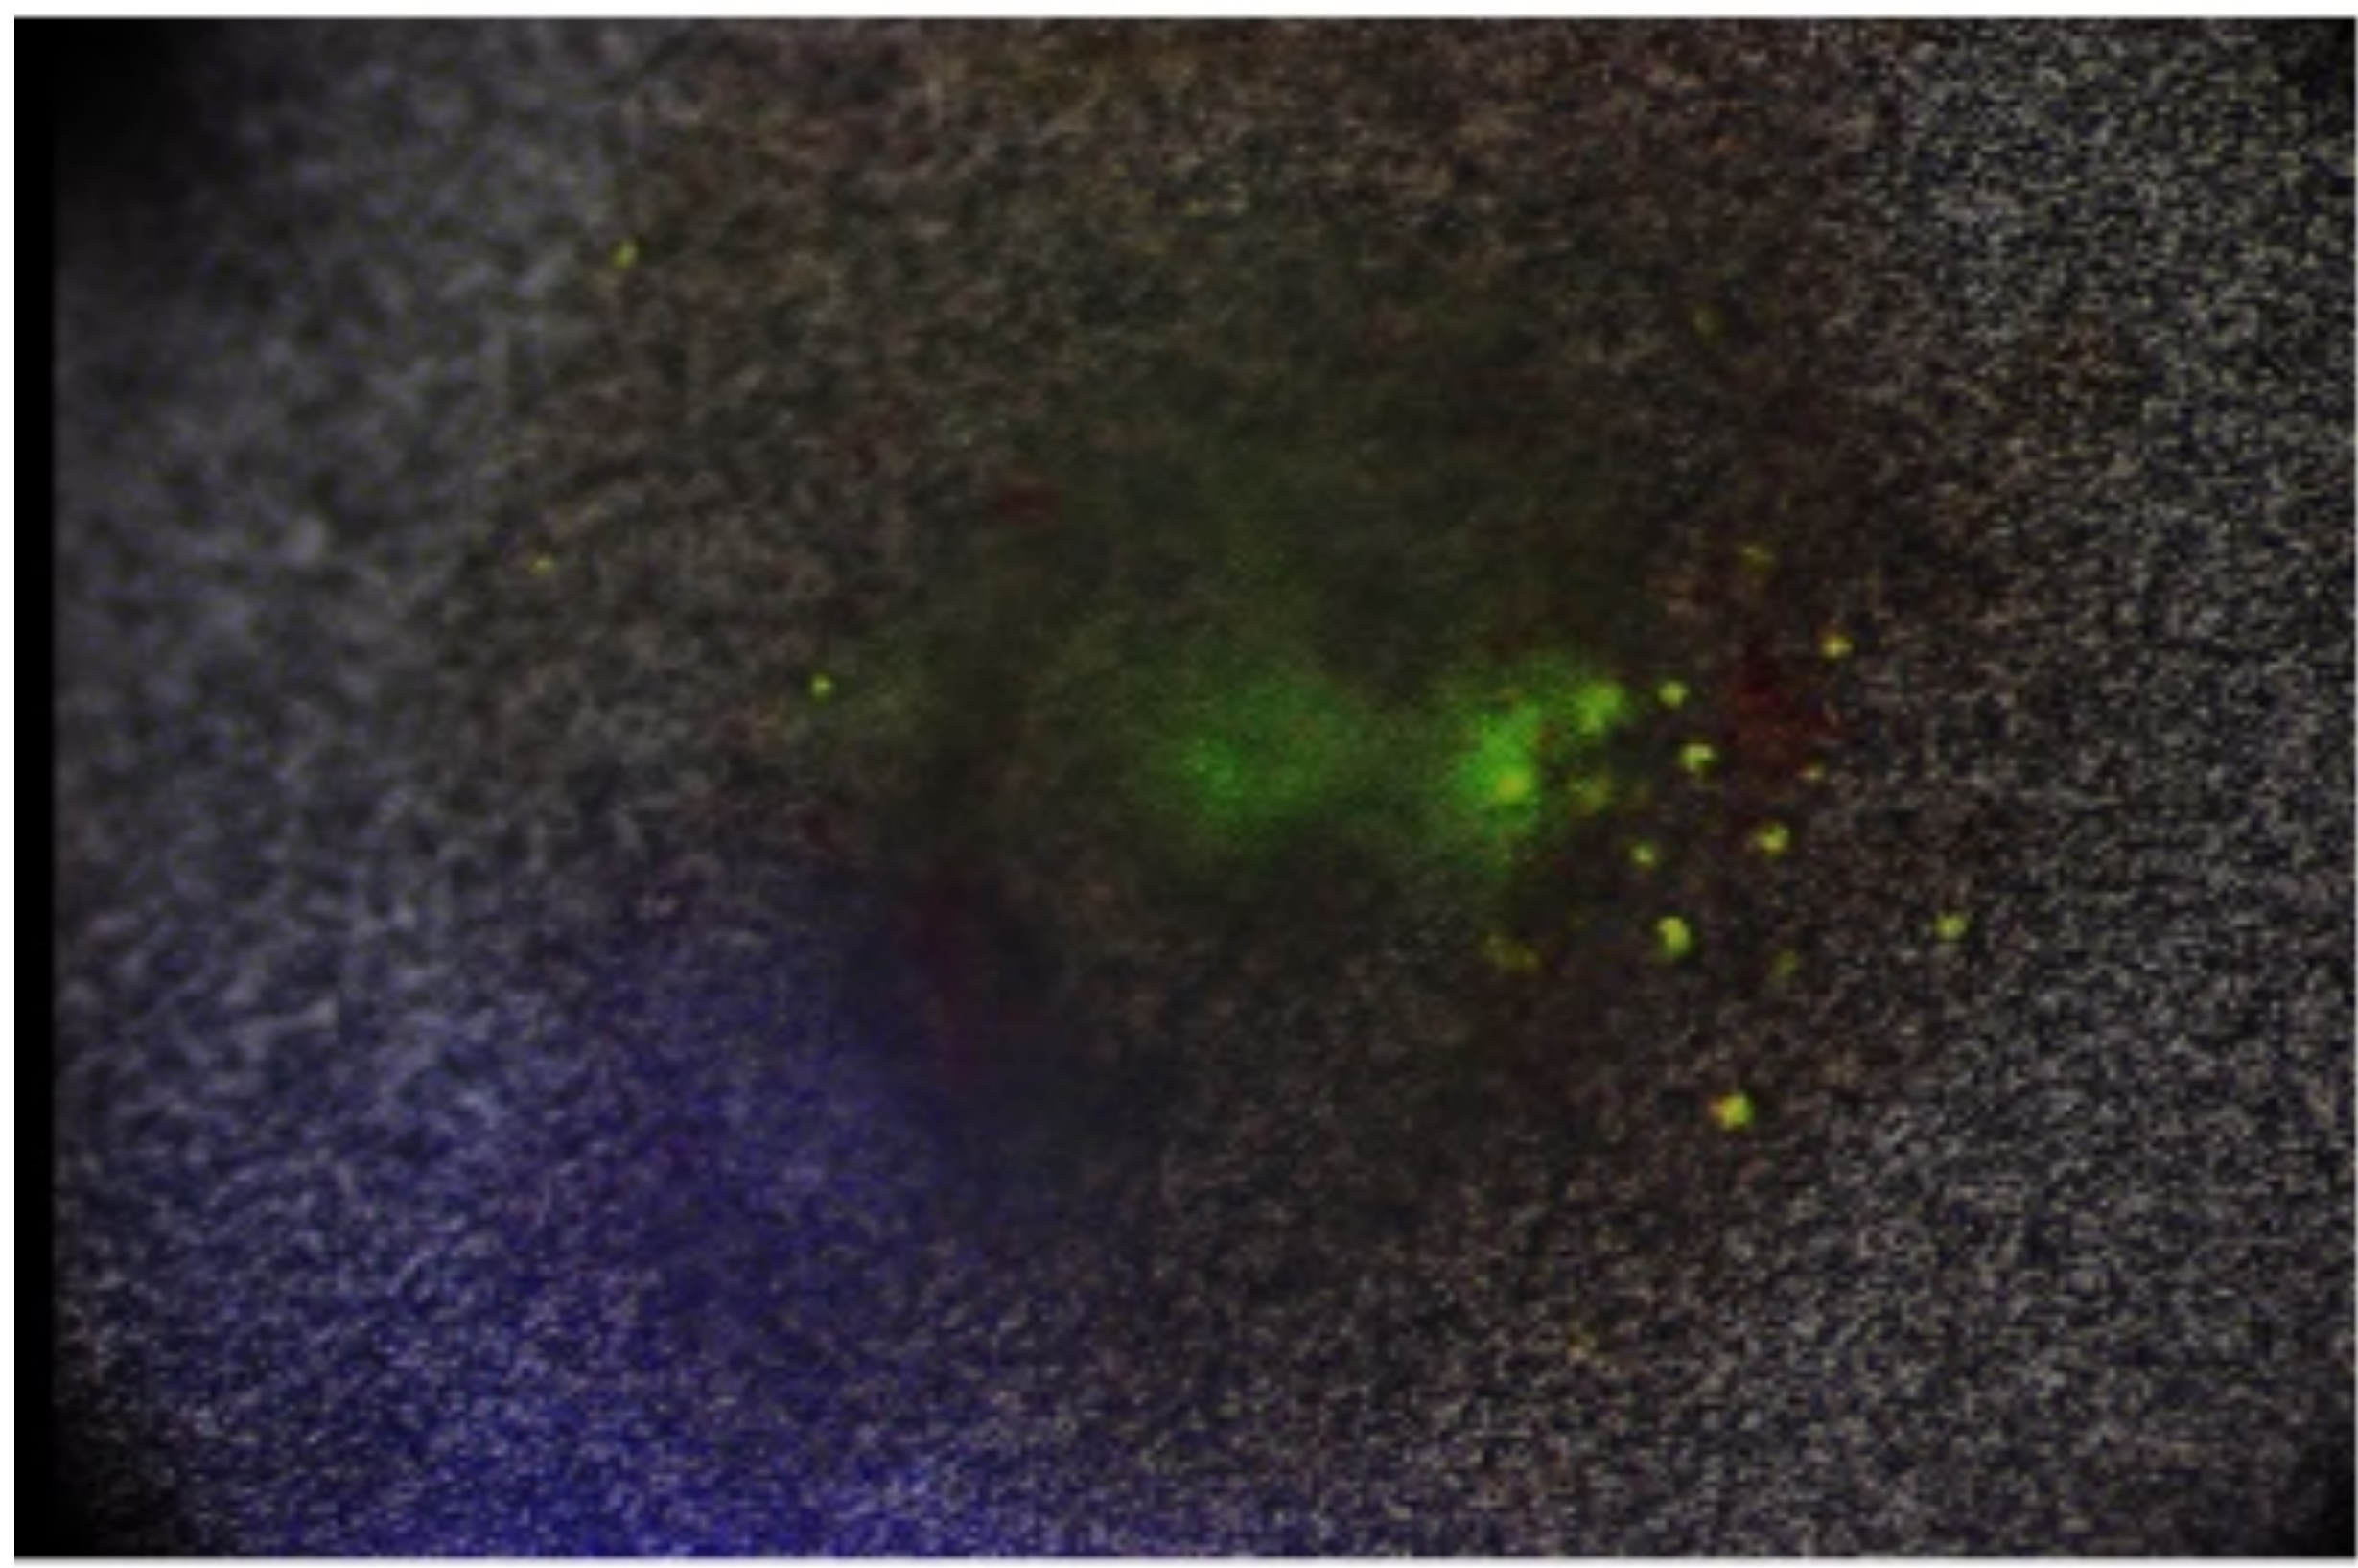

sgRNA1-USP49

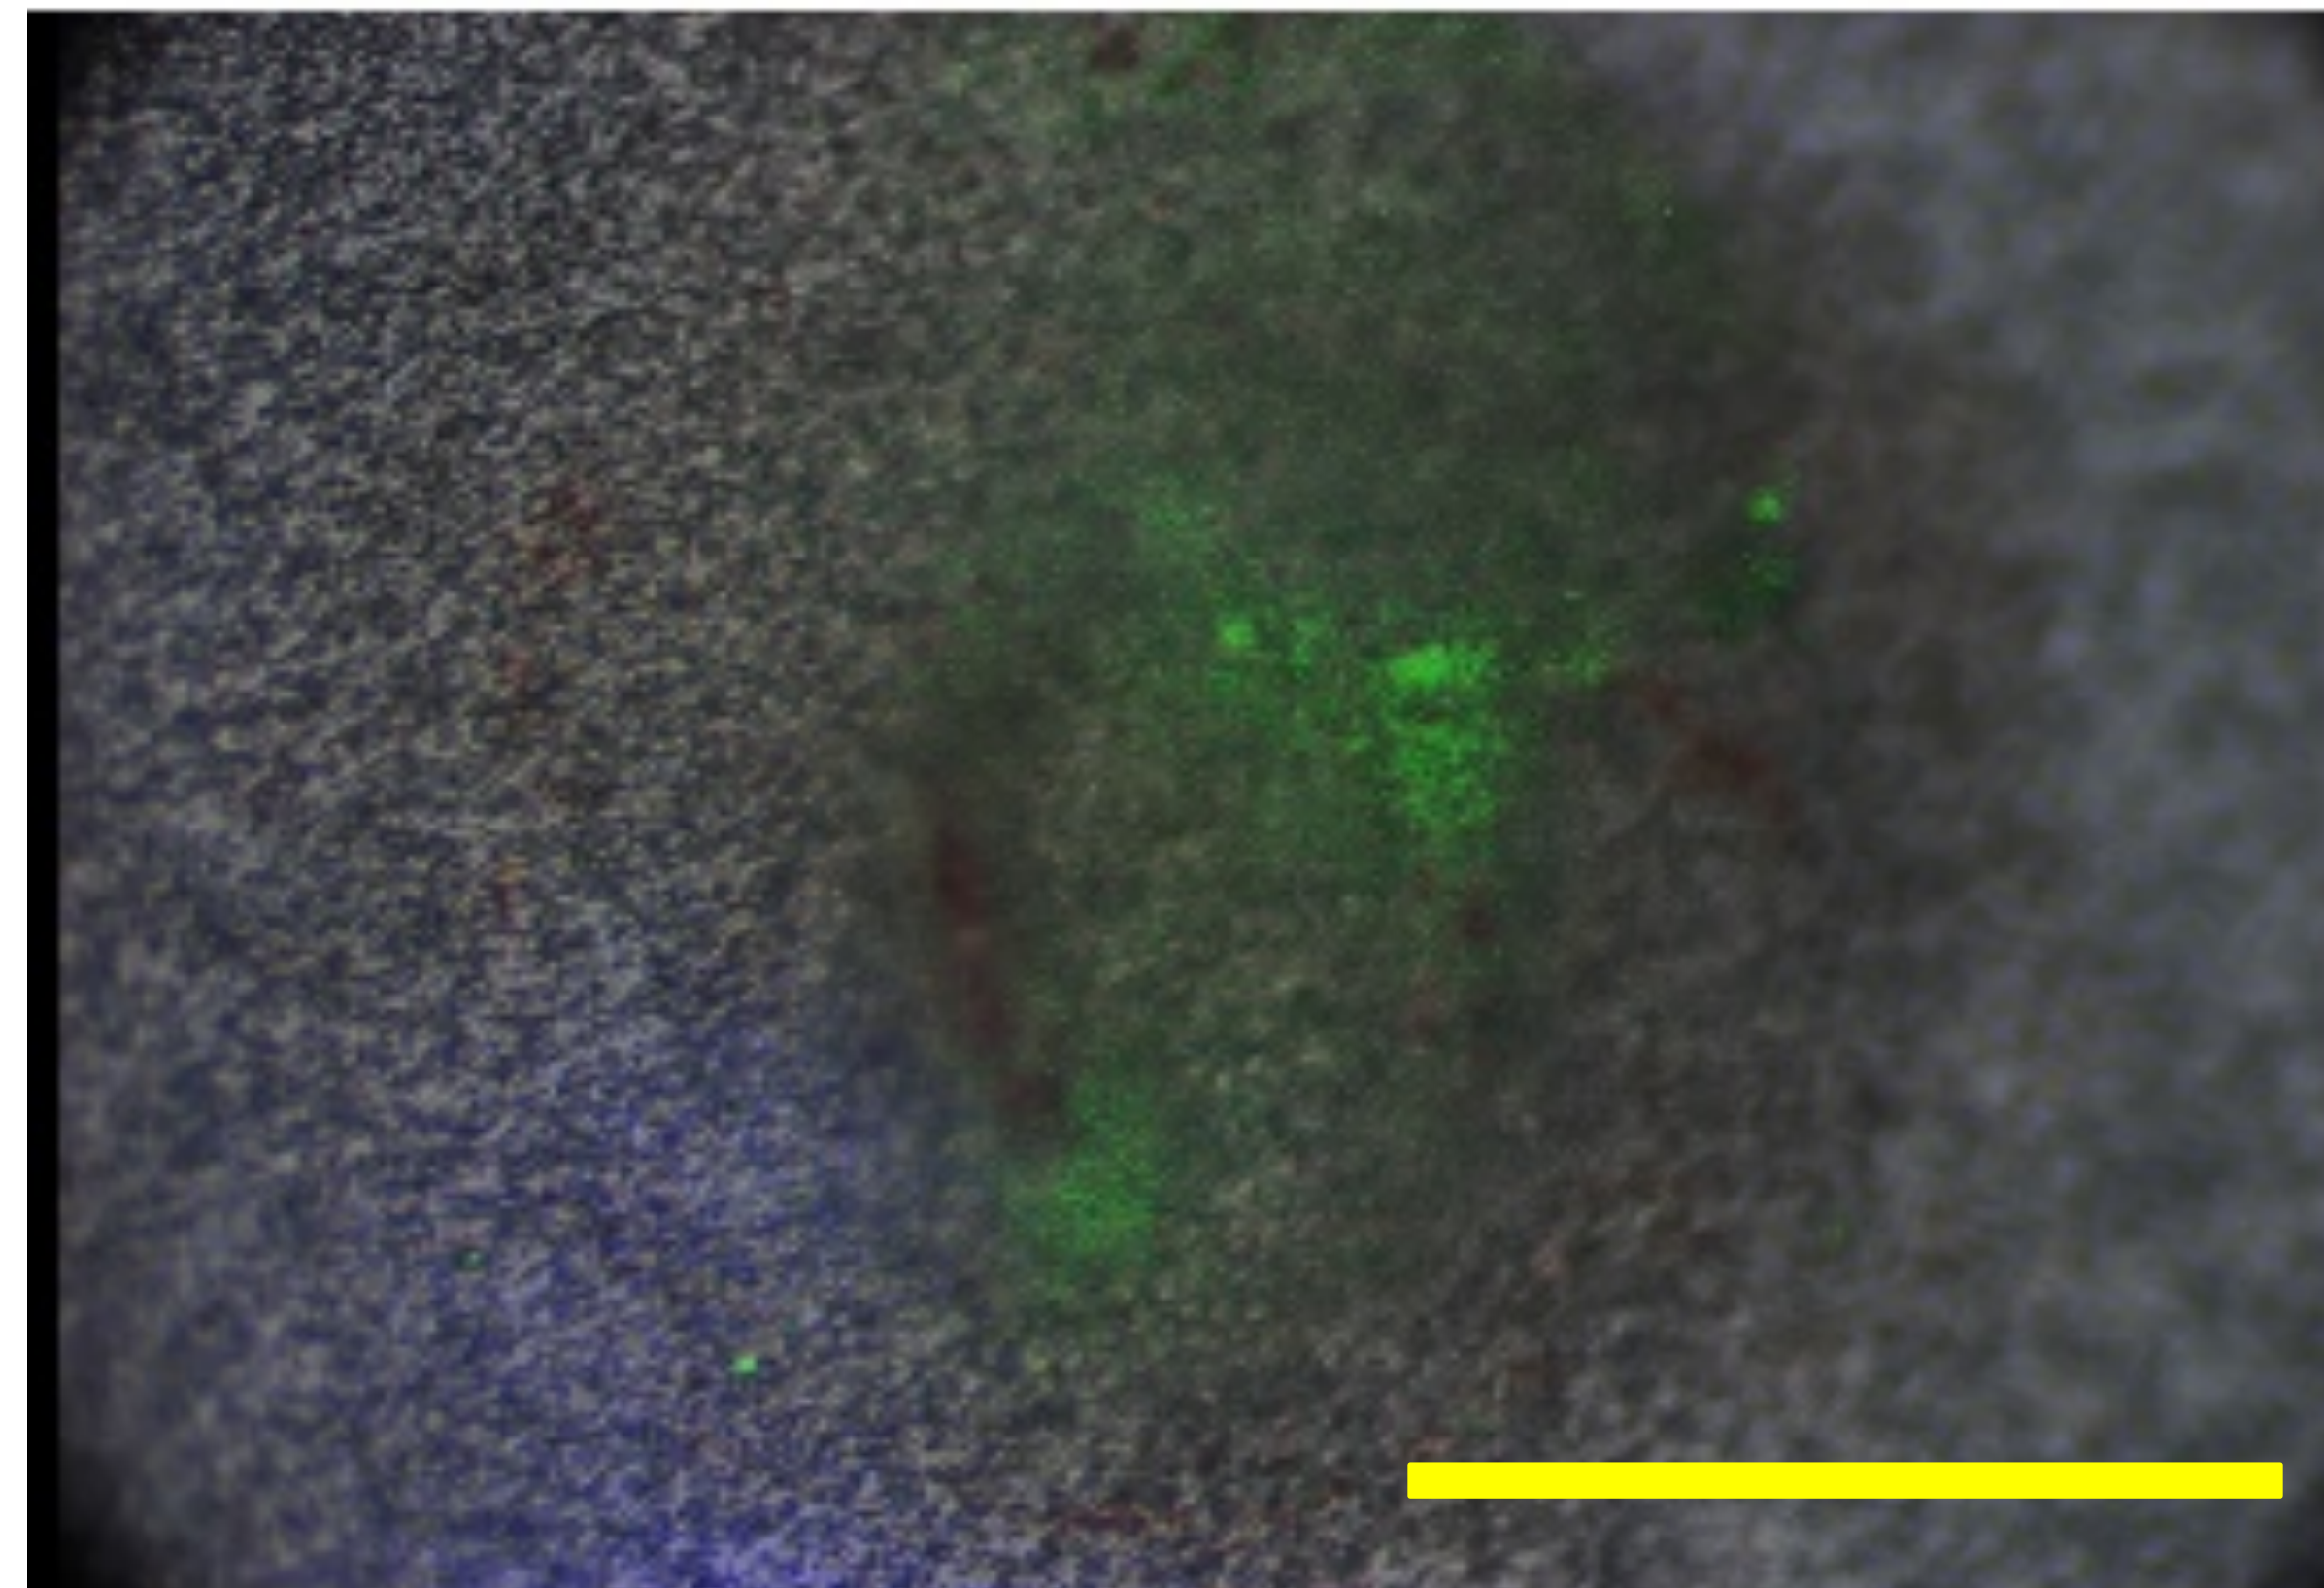

100  $\mu$ m

# Supplementary Fig. S16

## A

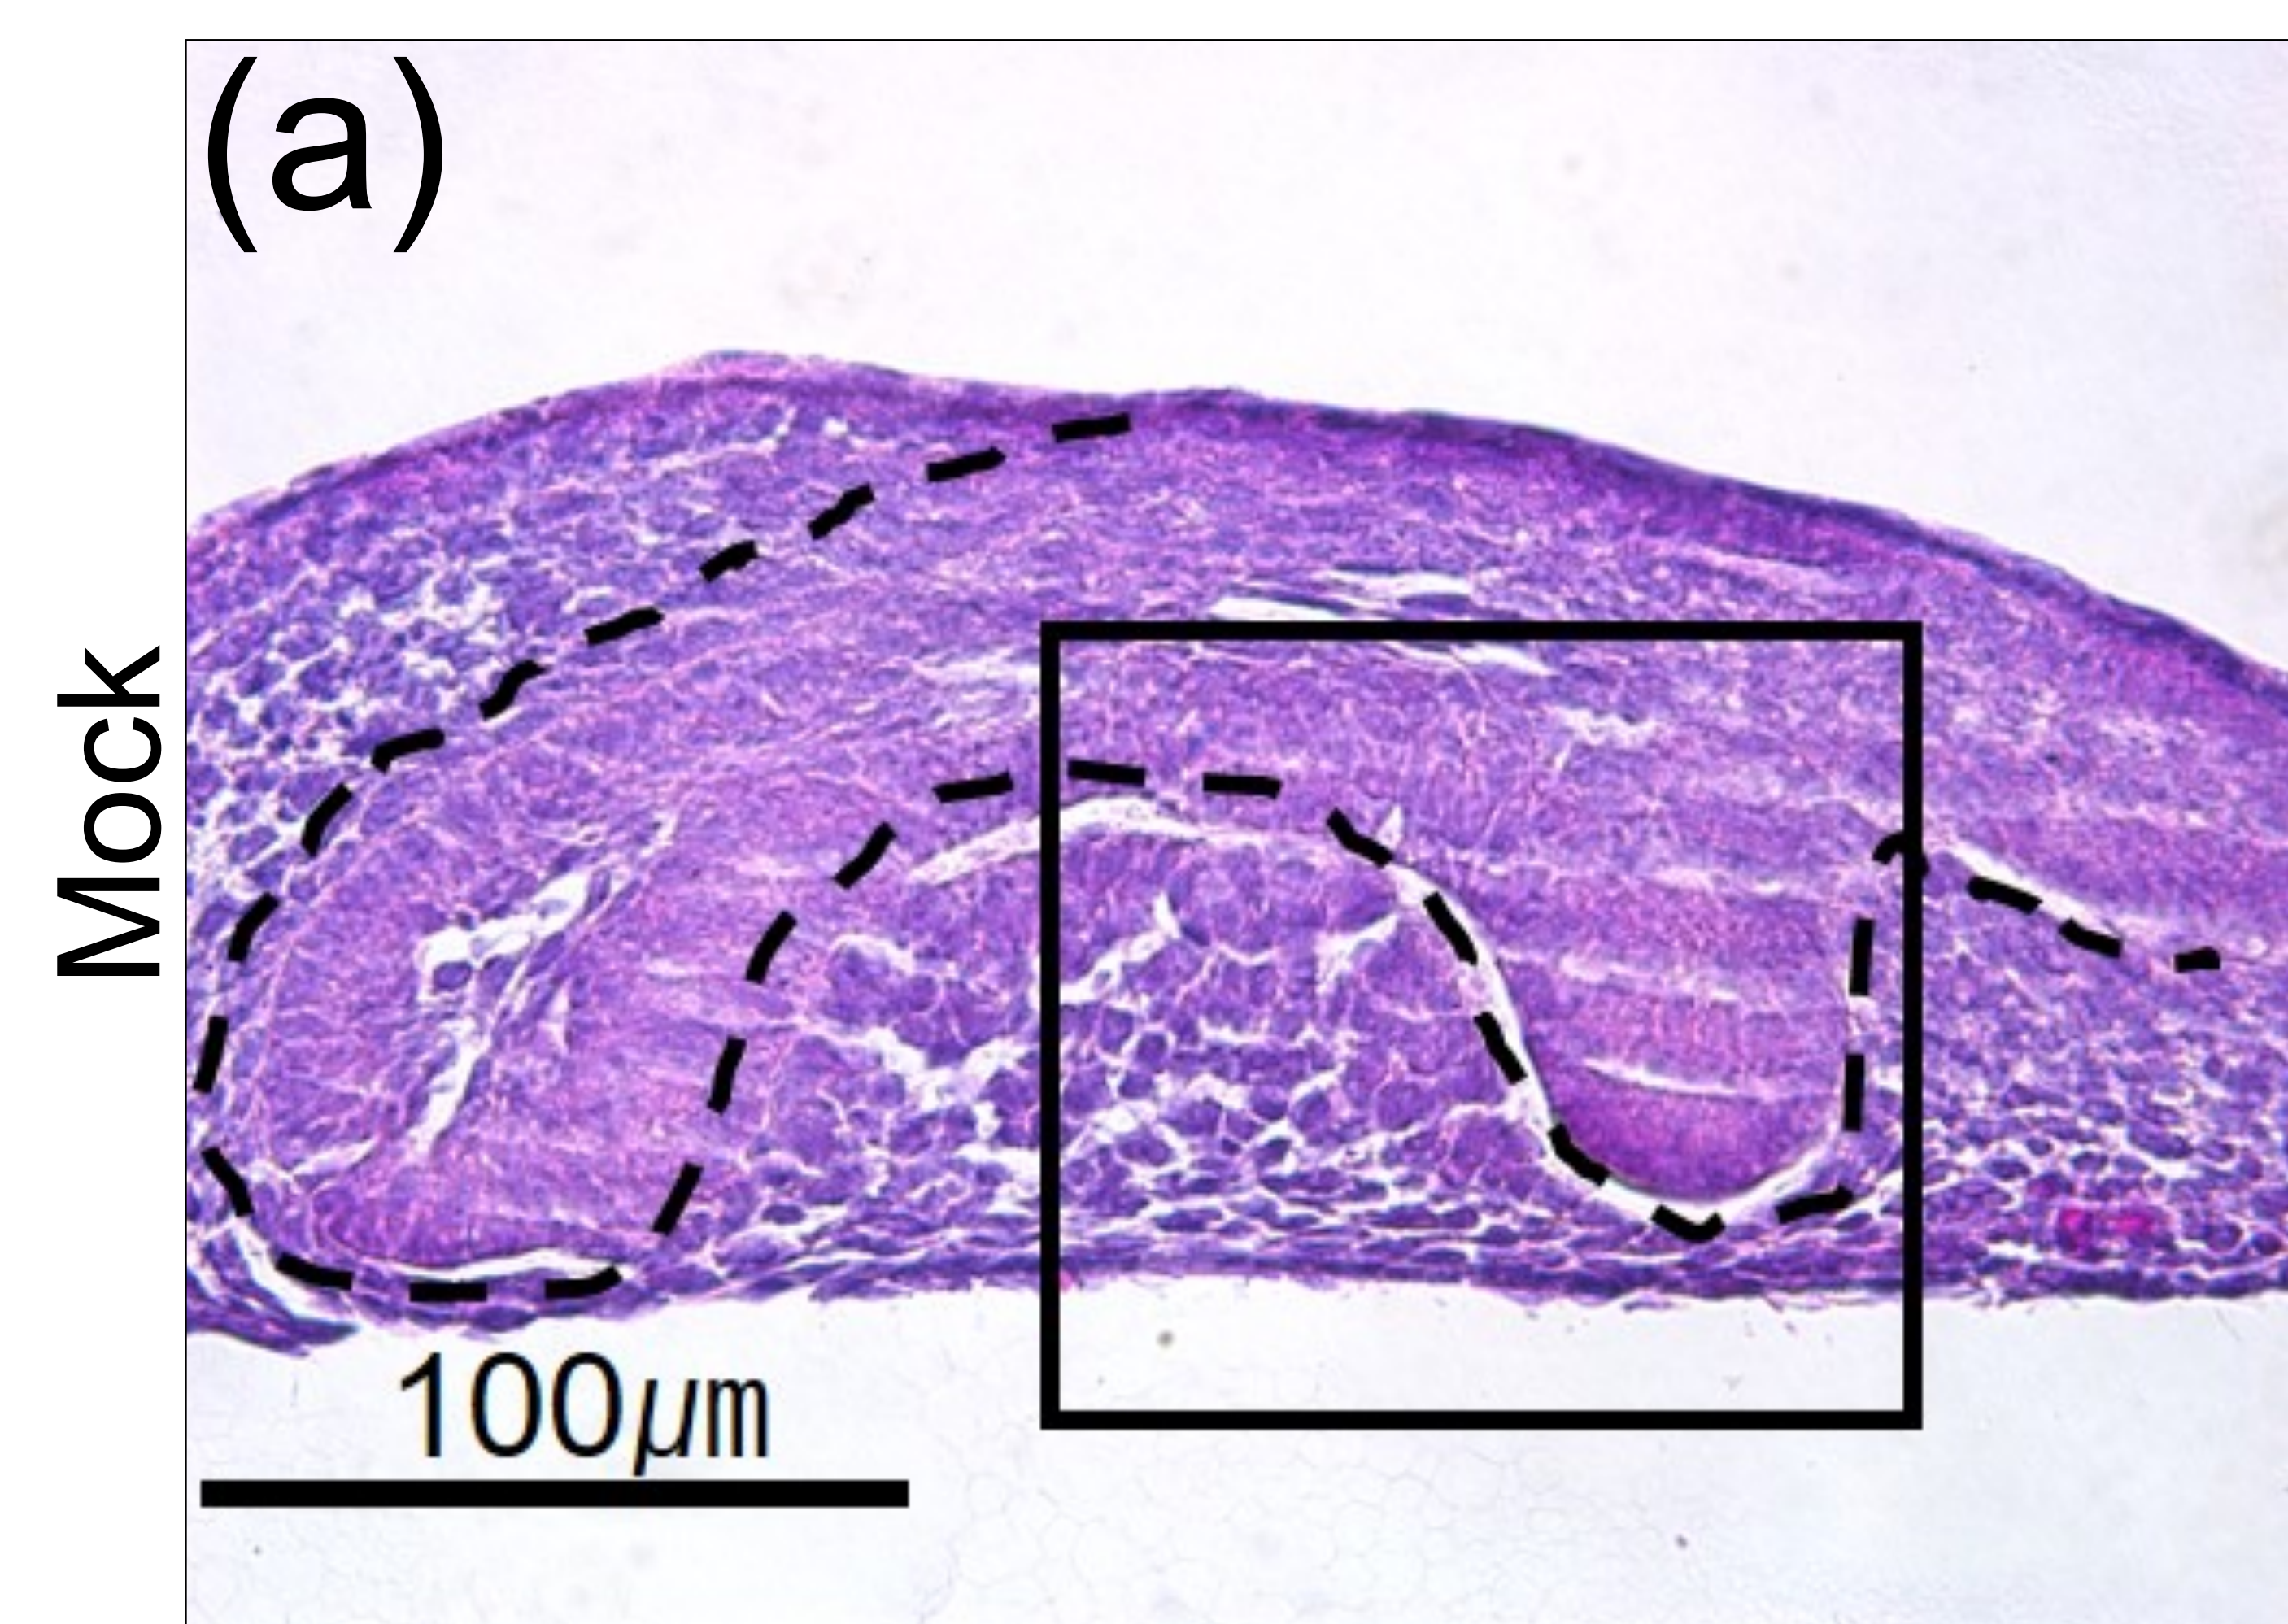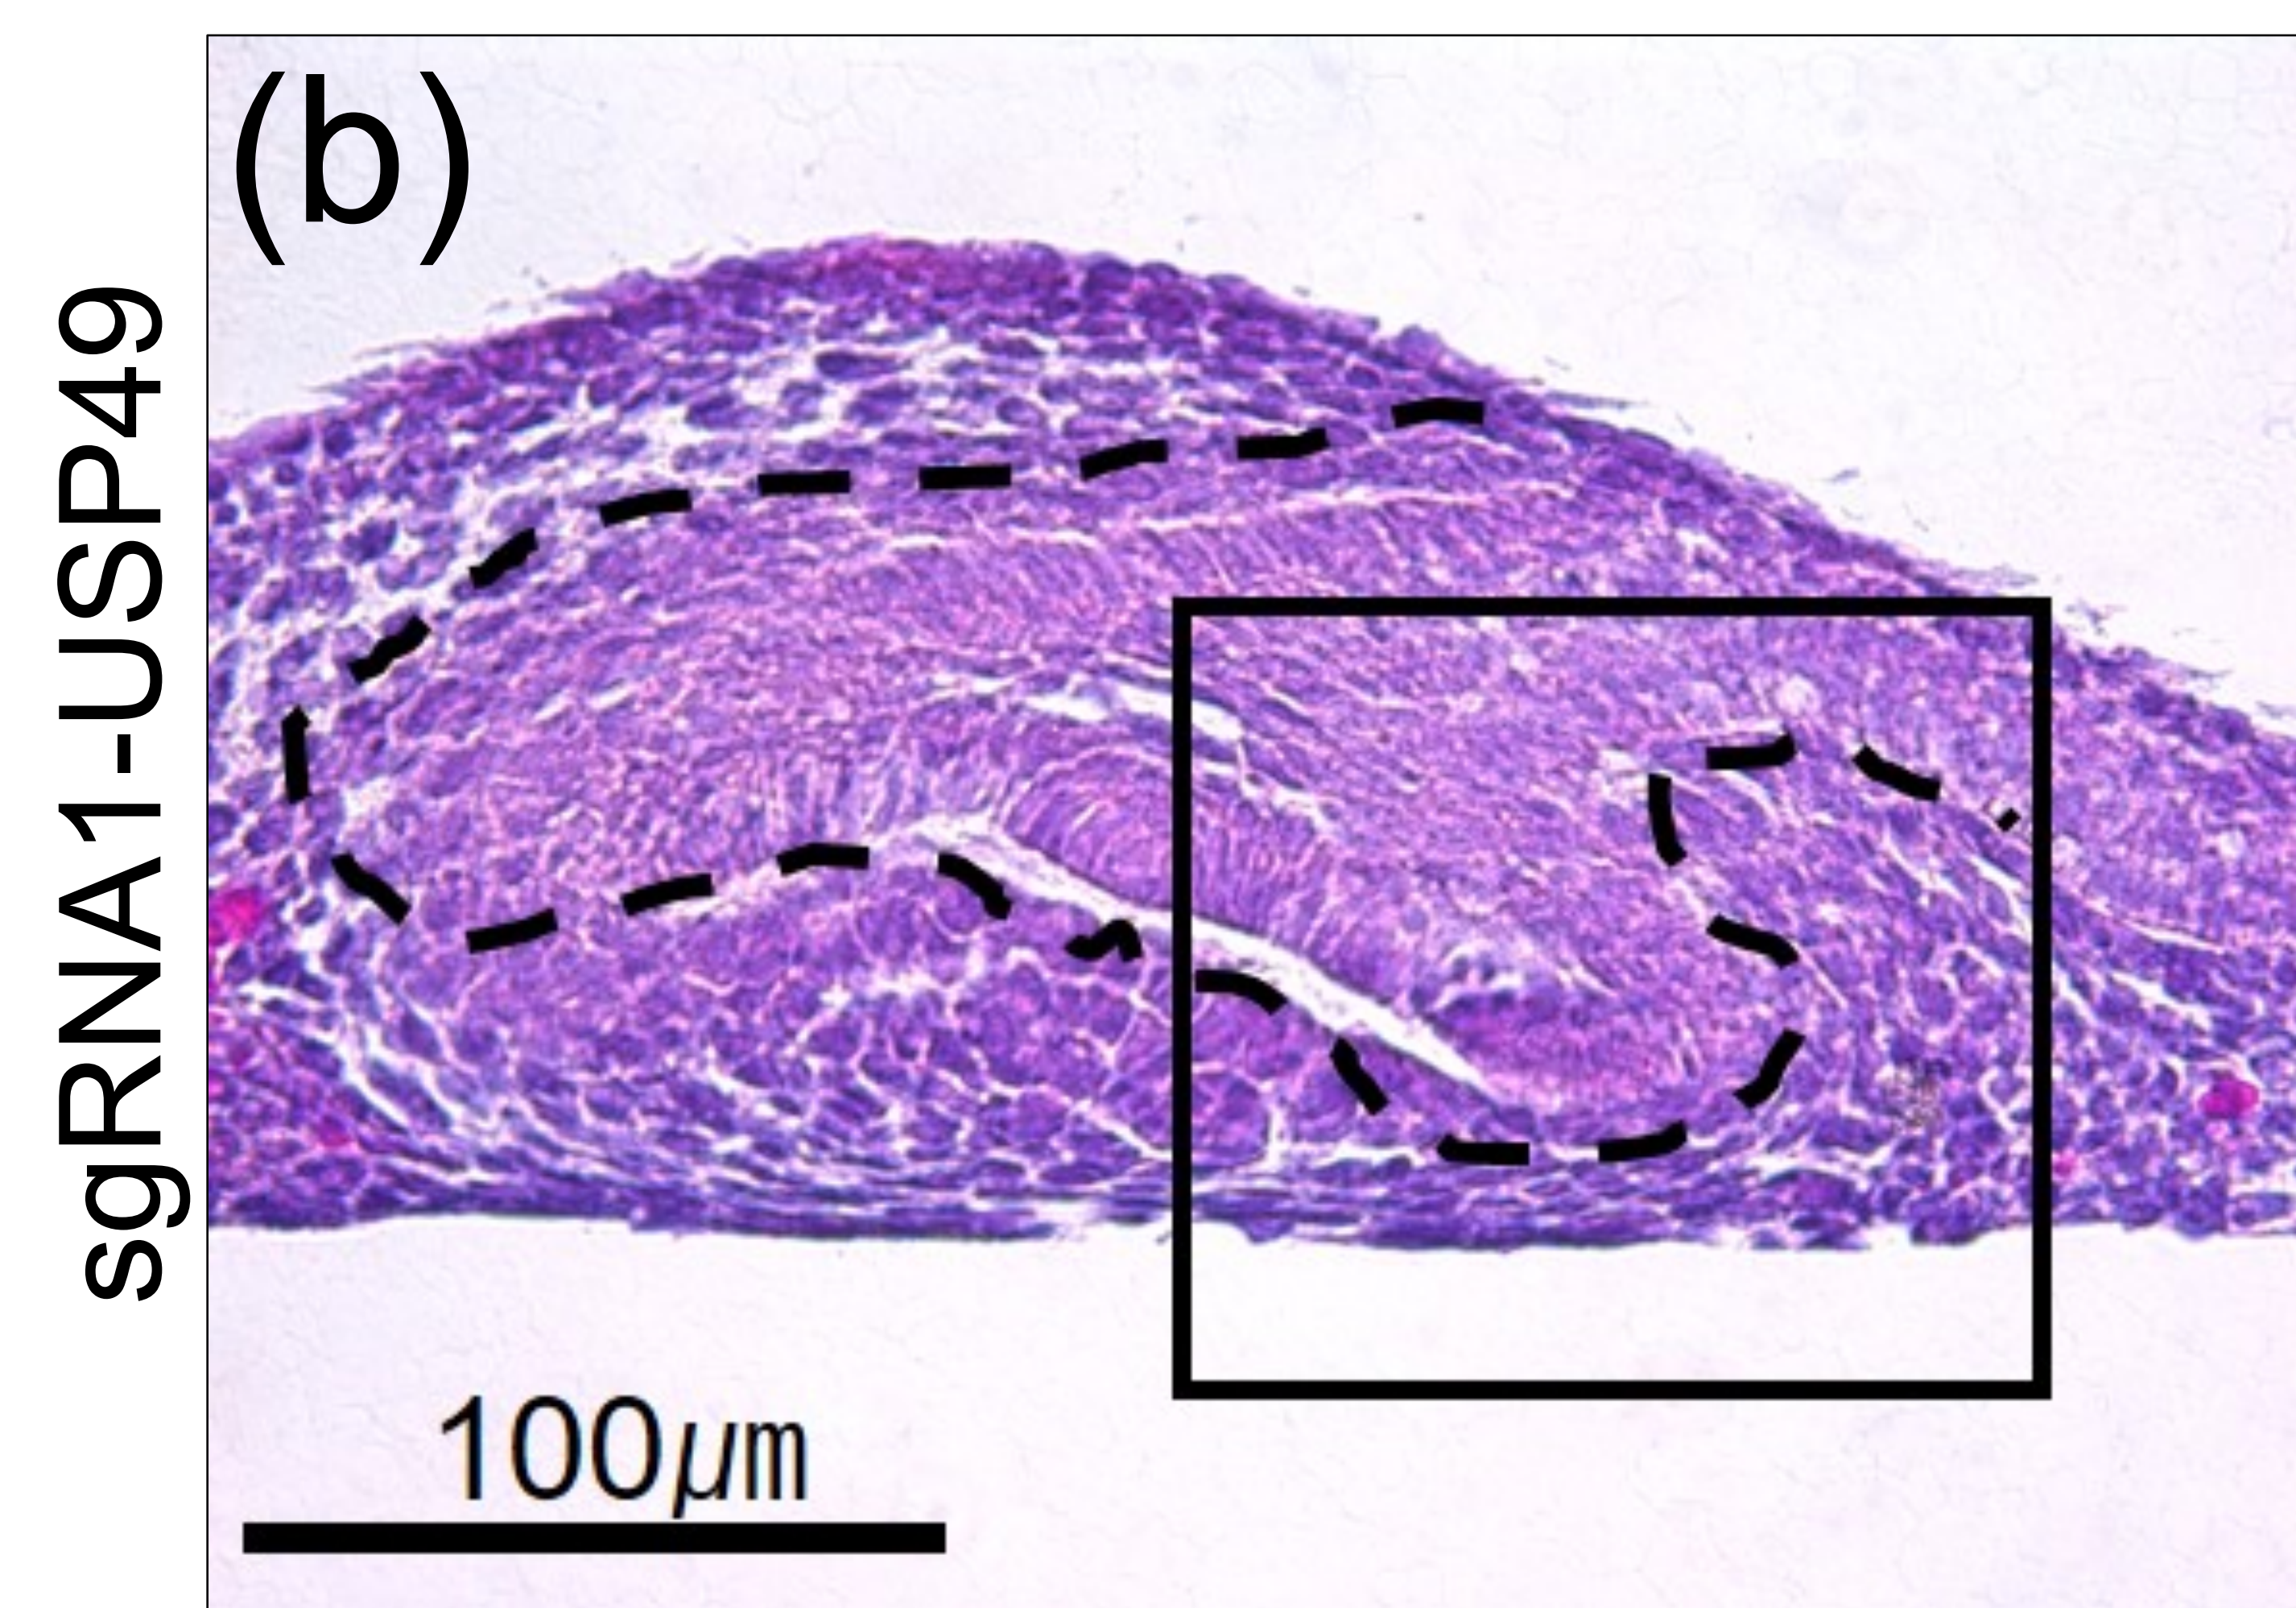

Supplement: 41418_2022_956_MOESM2_ESM.pdf [file 41418_2022_956_MOESM2_ESM.pdf]
