# Supplementary material for: Genome-wide screening for deubiquitinase subfamily identifies ubiquitin-specific protease 49 as a novel regulator of odontogenesis
Source: PubMed Central journal article supplement (PMC9433428; doi:10.1038/s41418-022-00956-7), 2022-03-10

# Uncropped blots of Fig. 1

## A

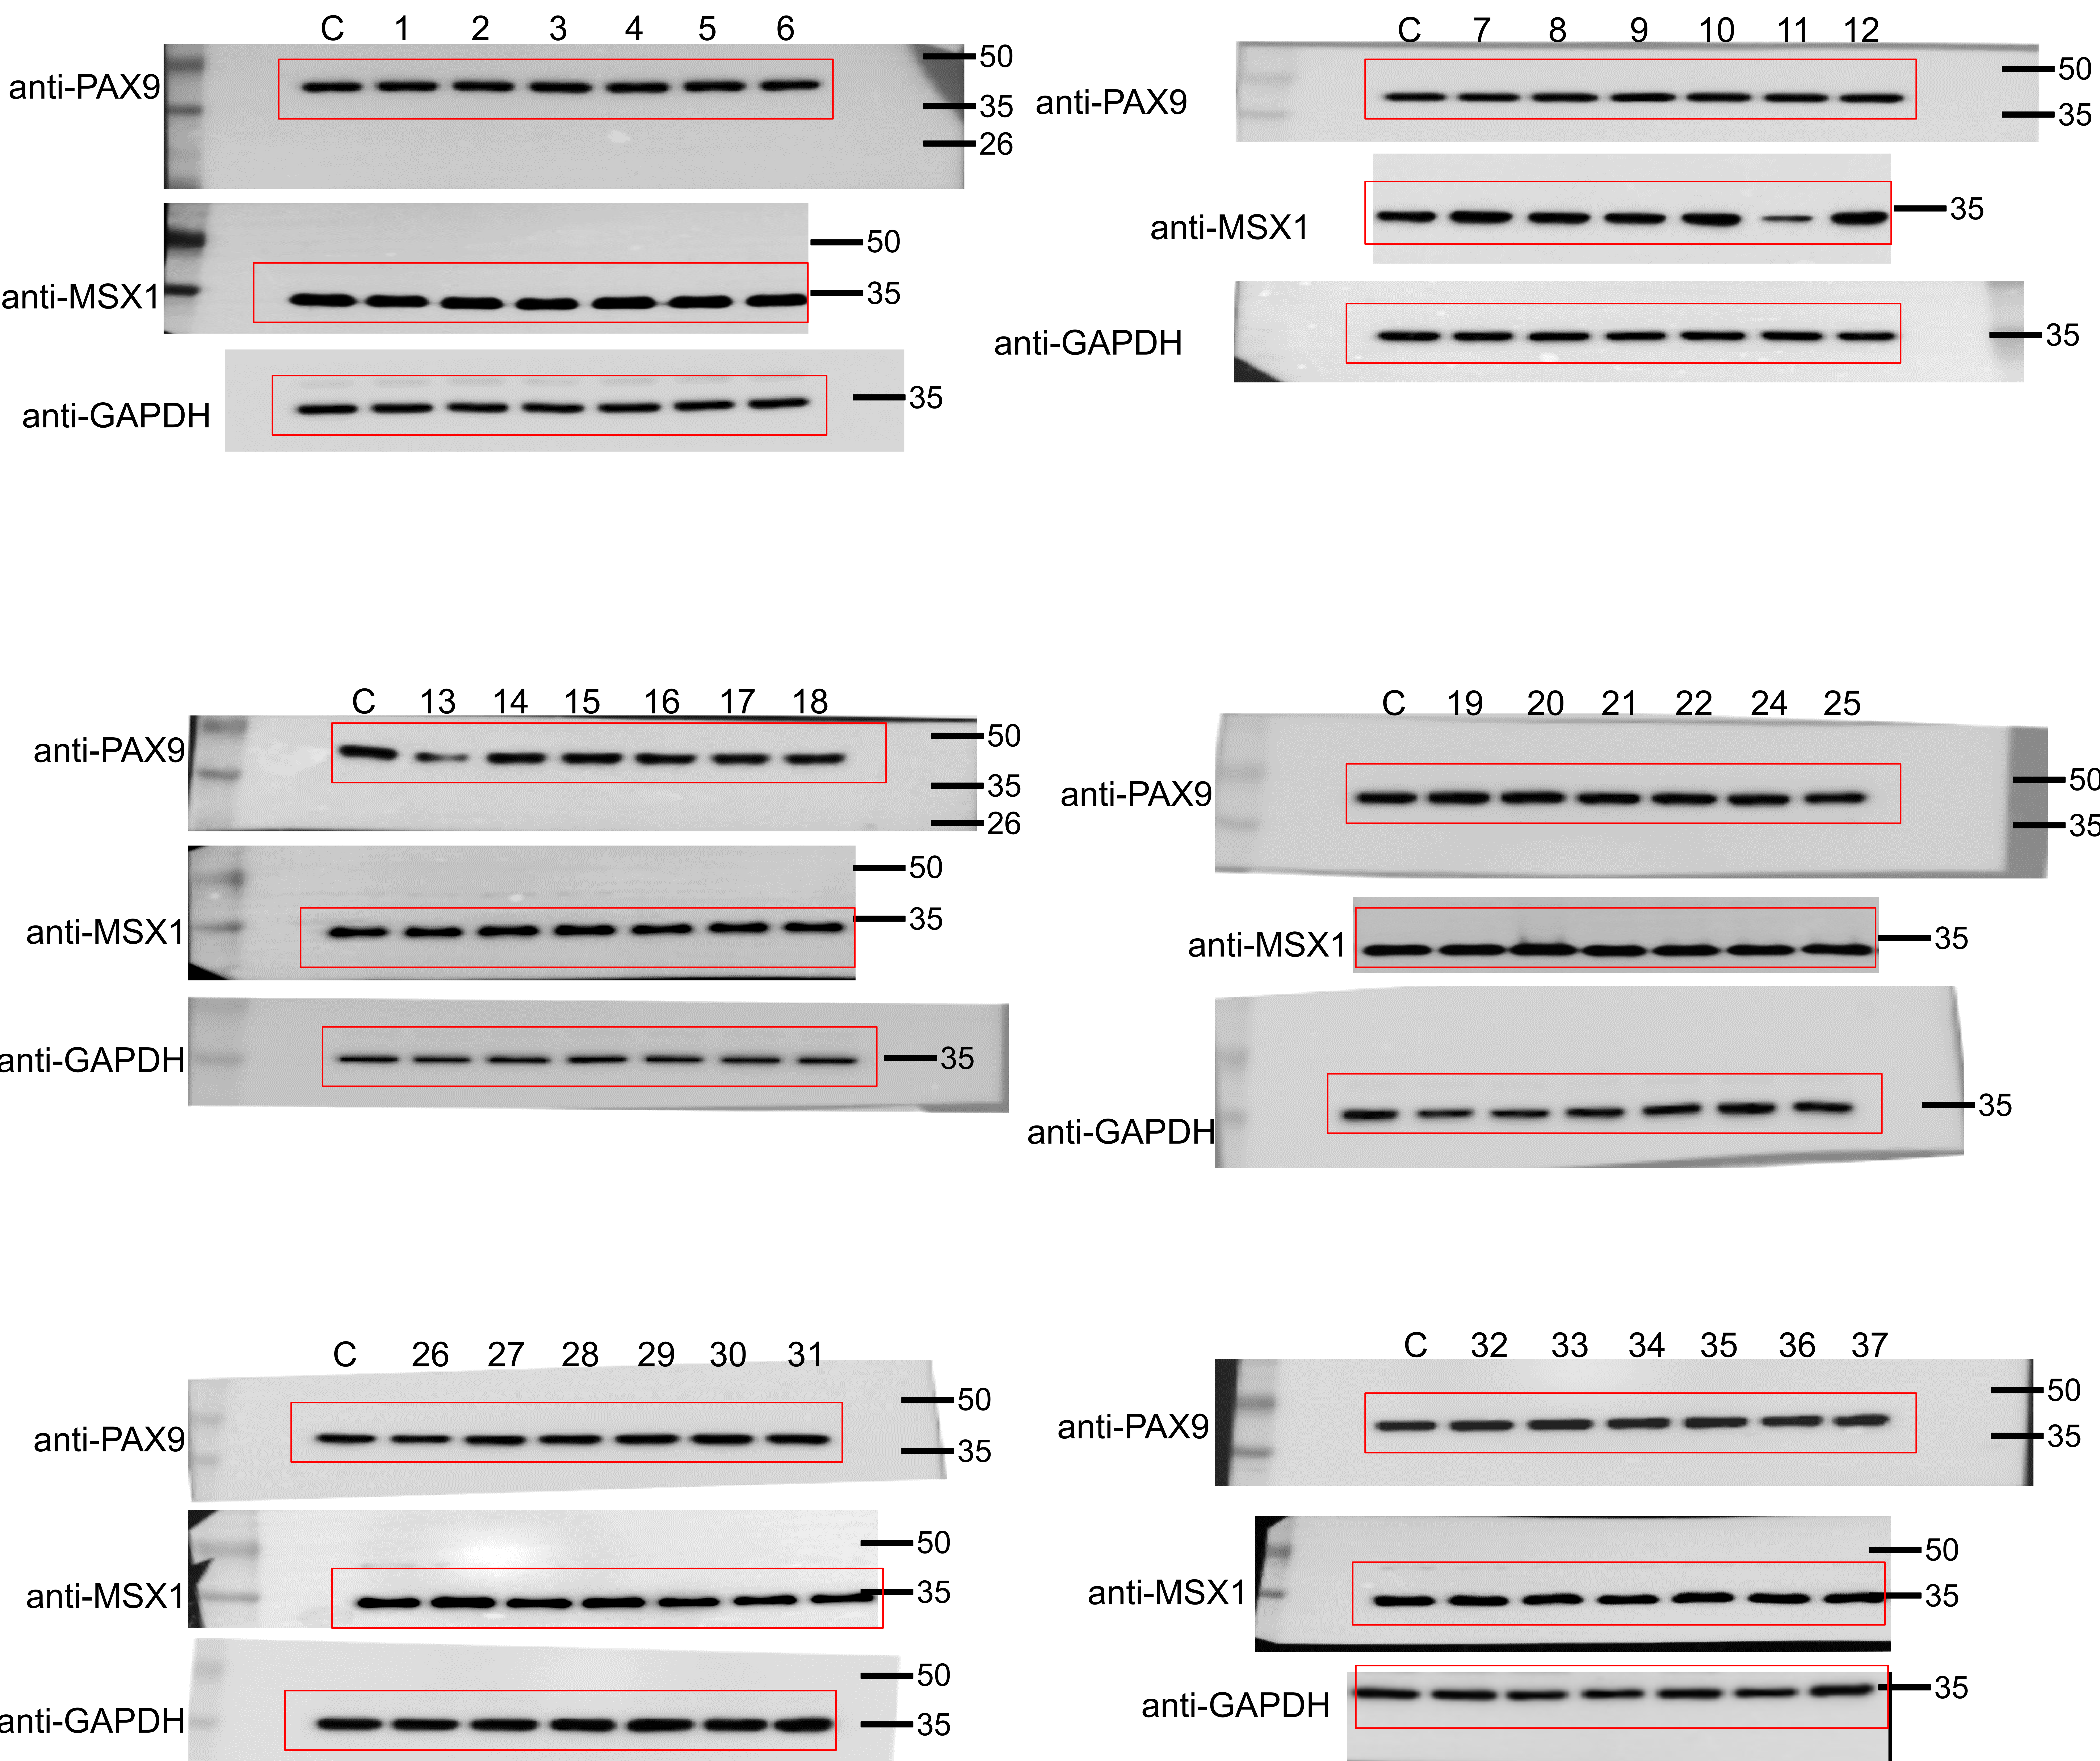

# Uncropped blots of Fig. 1

## A

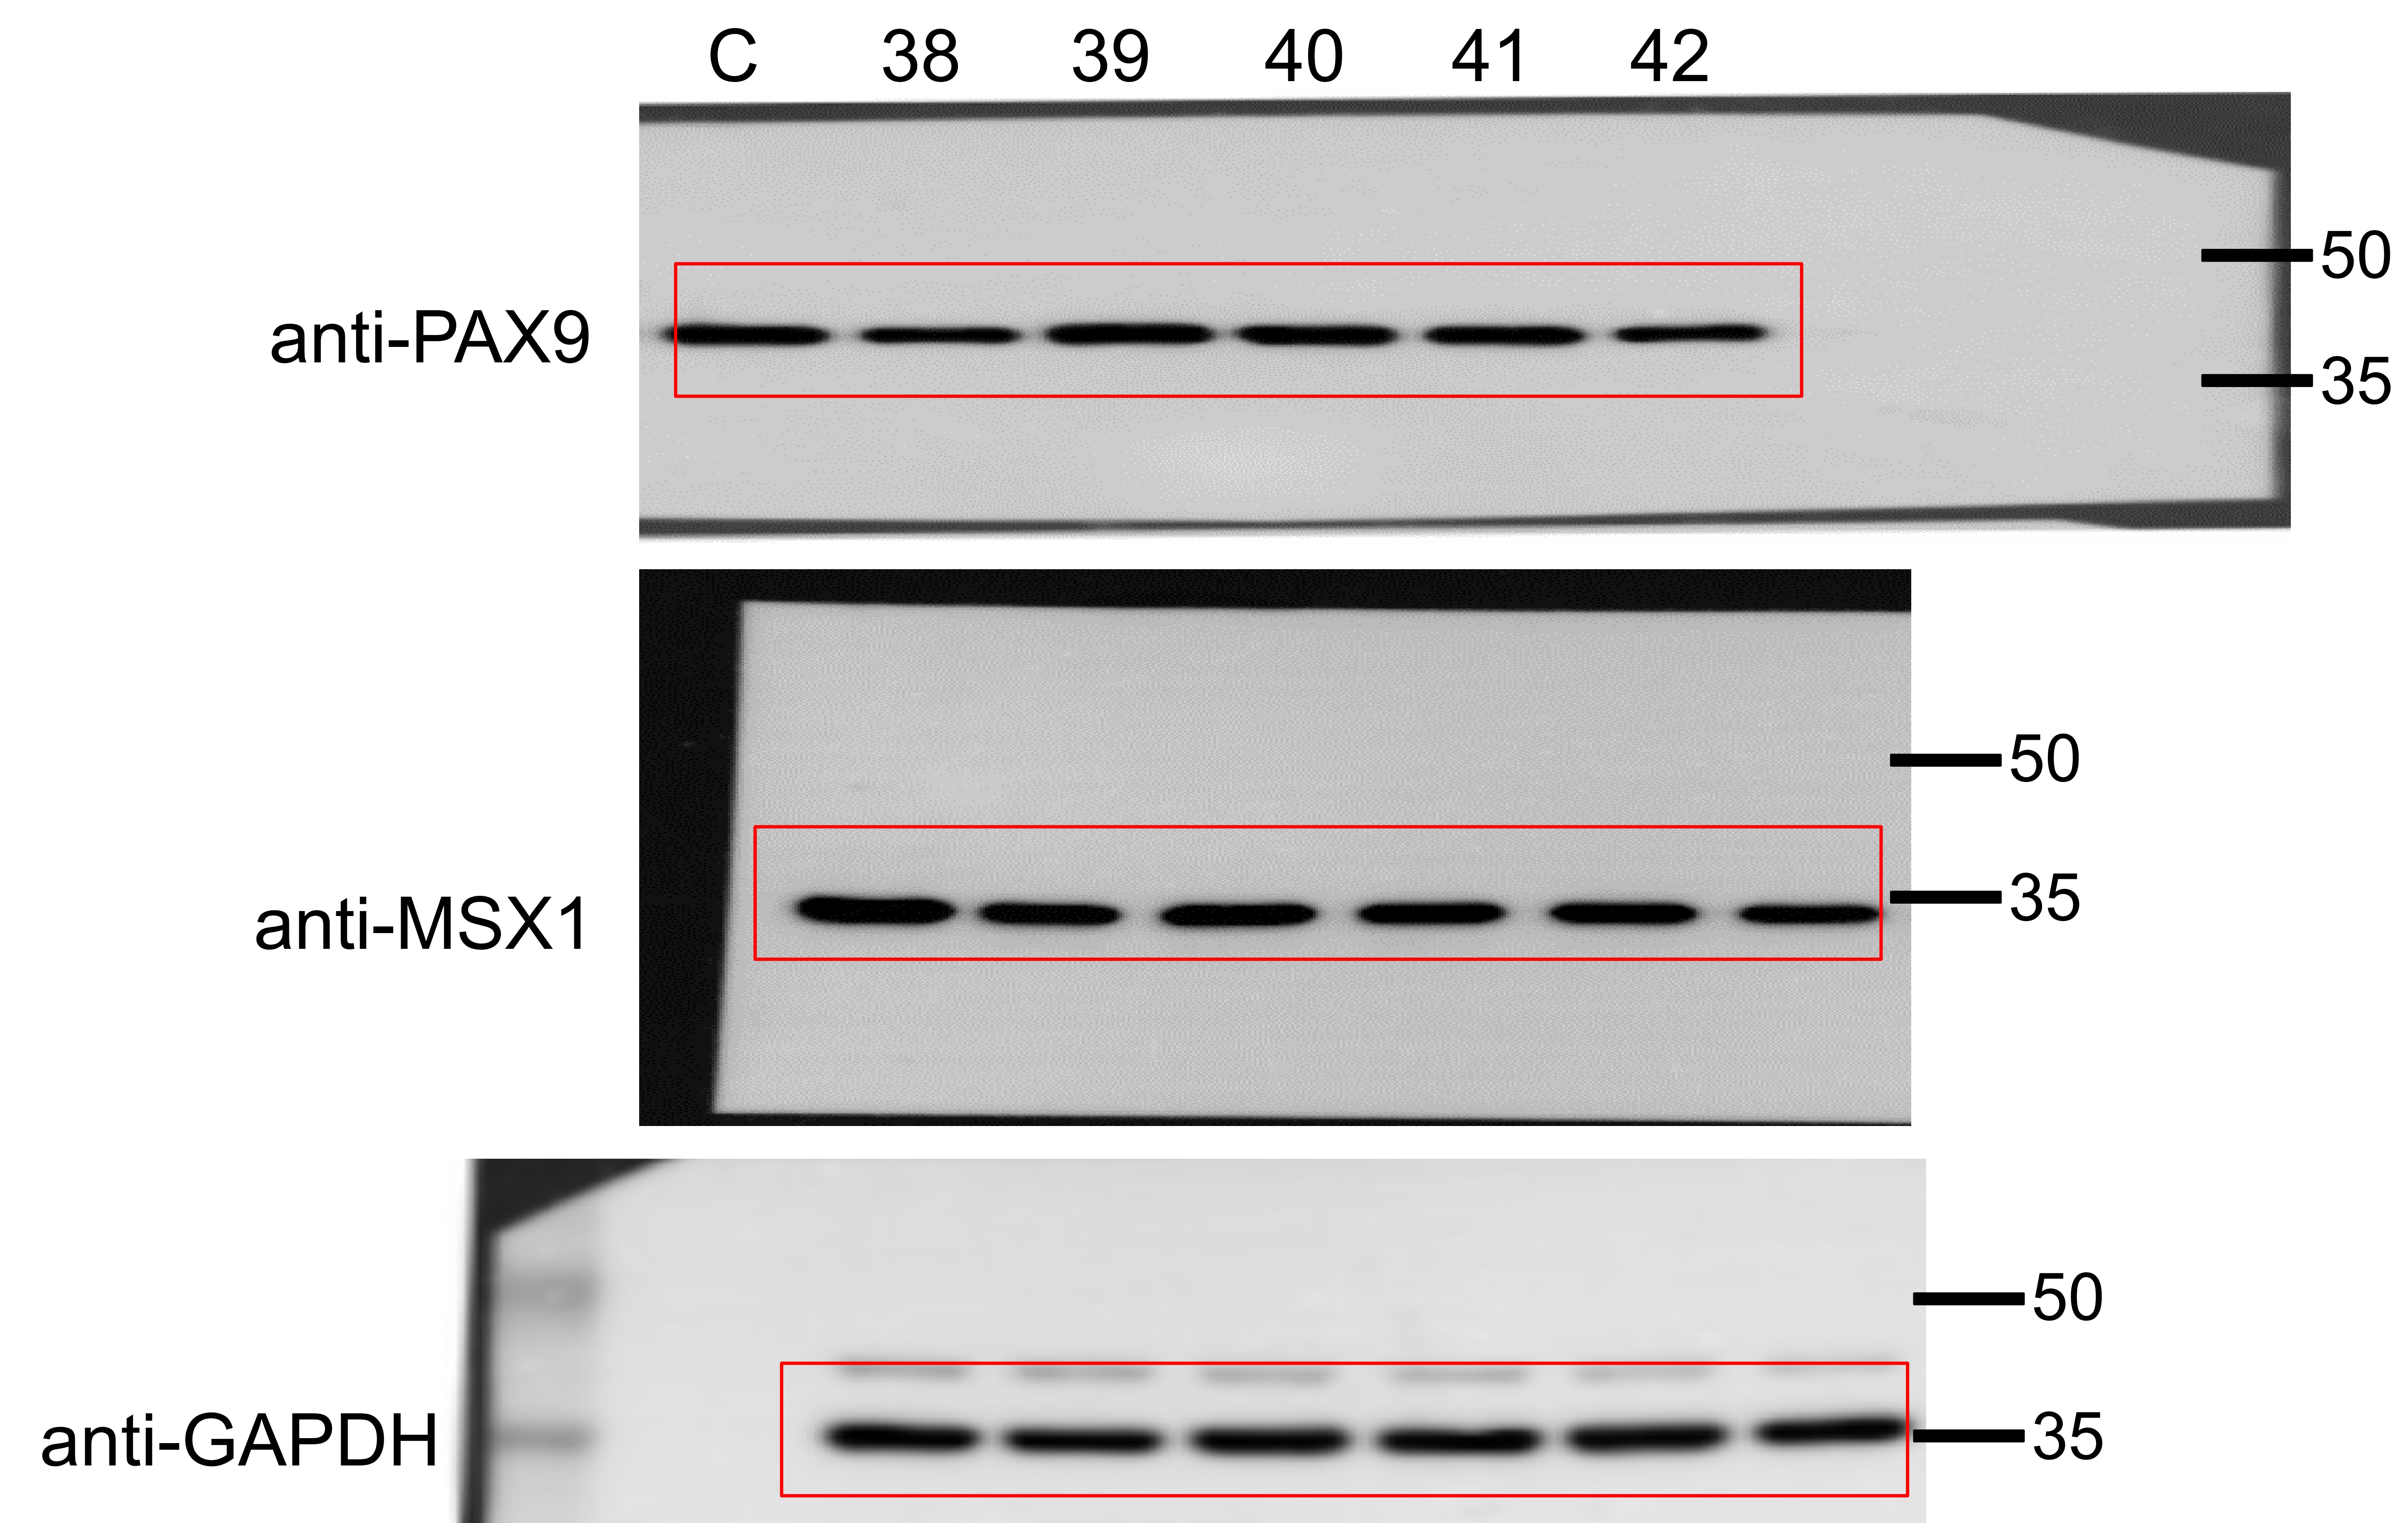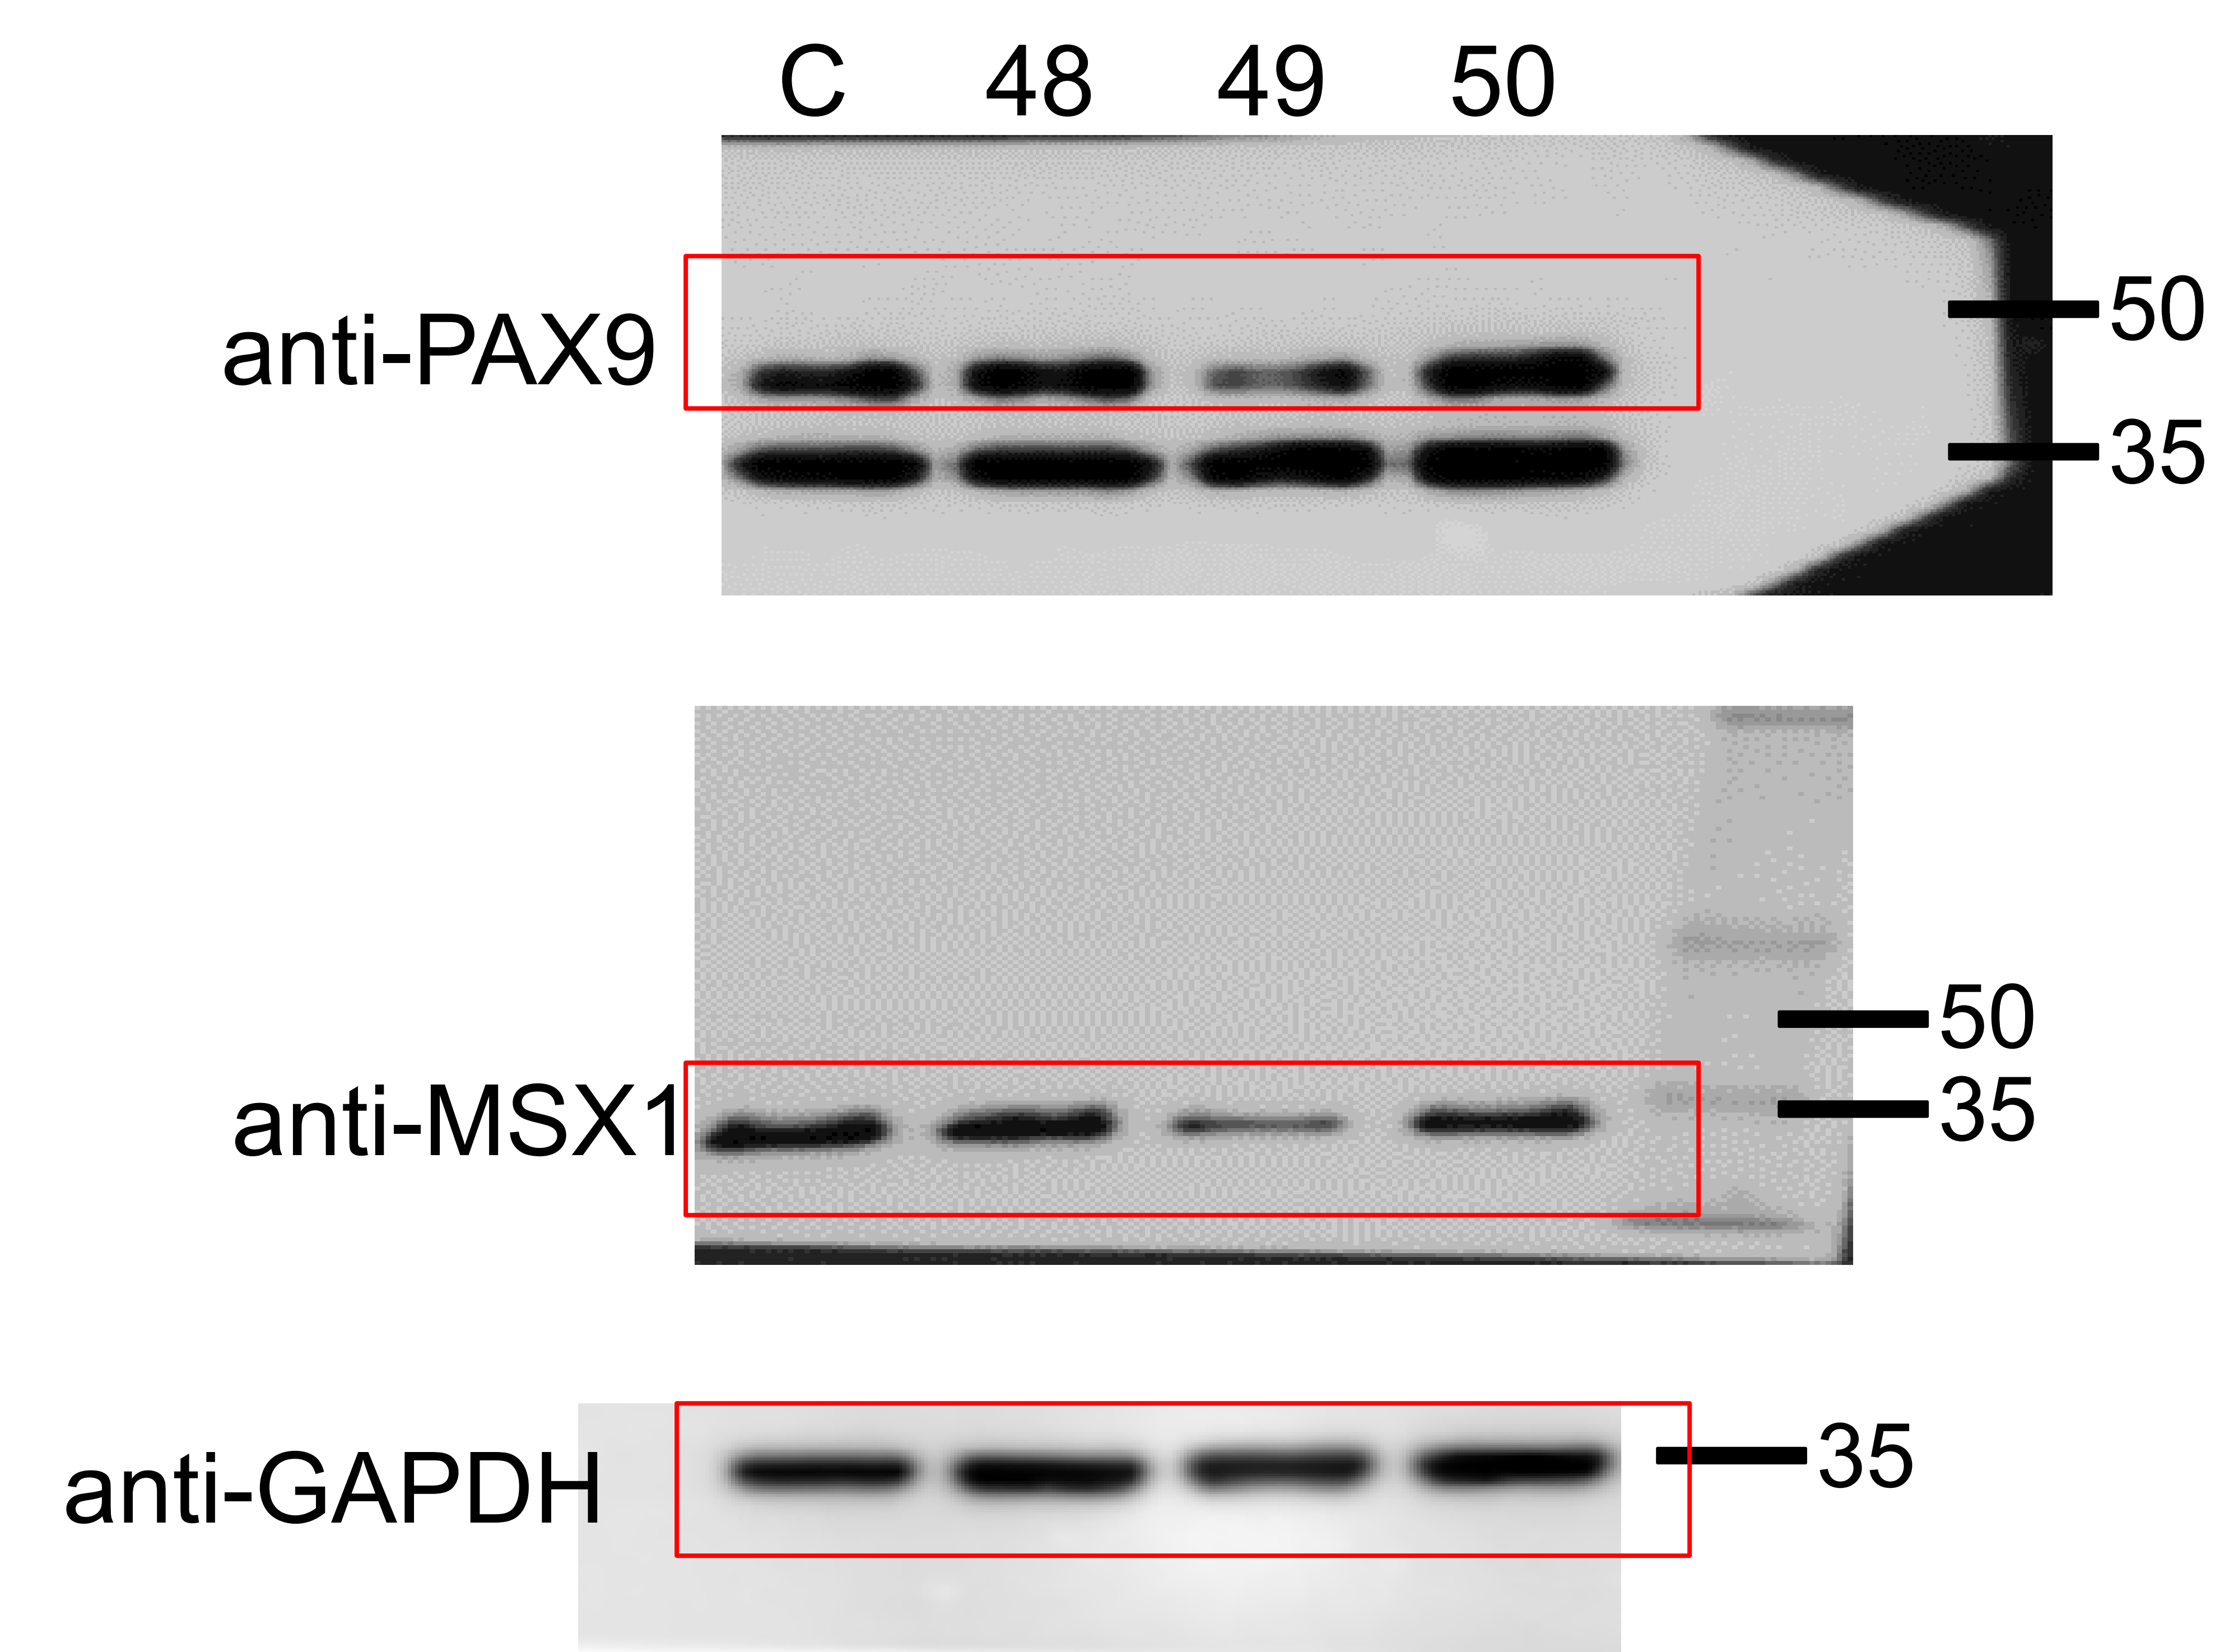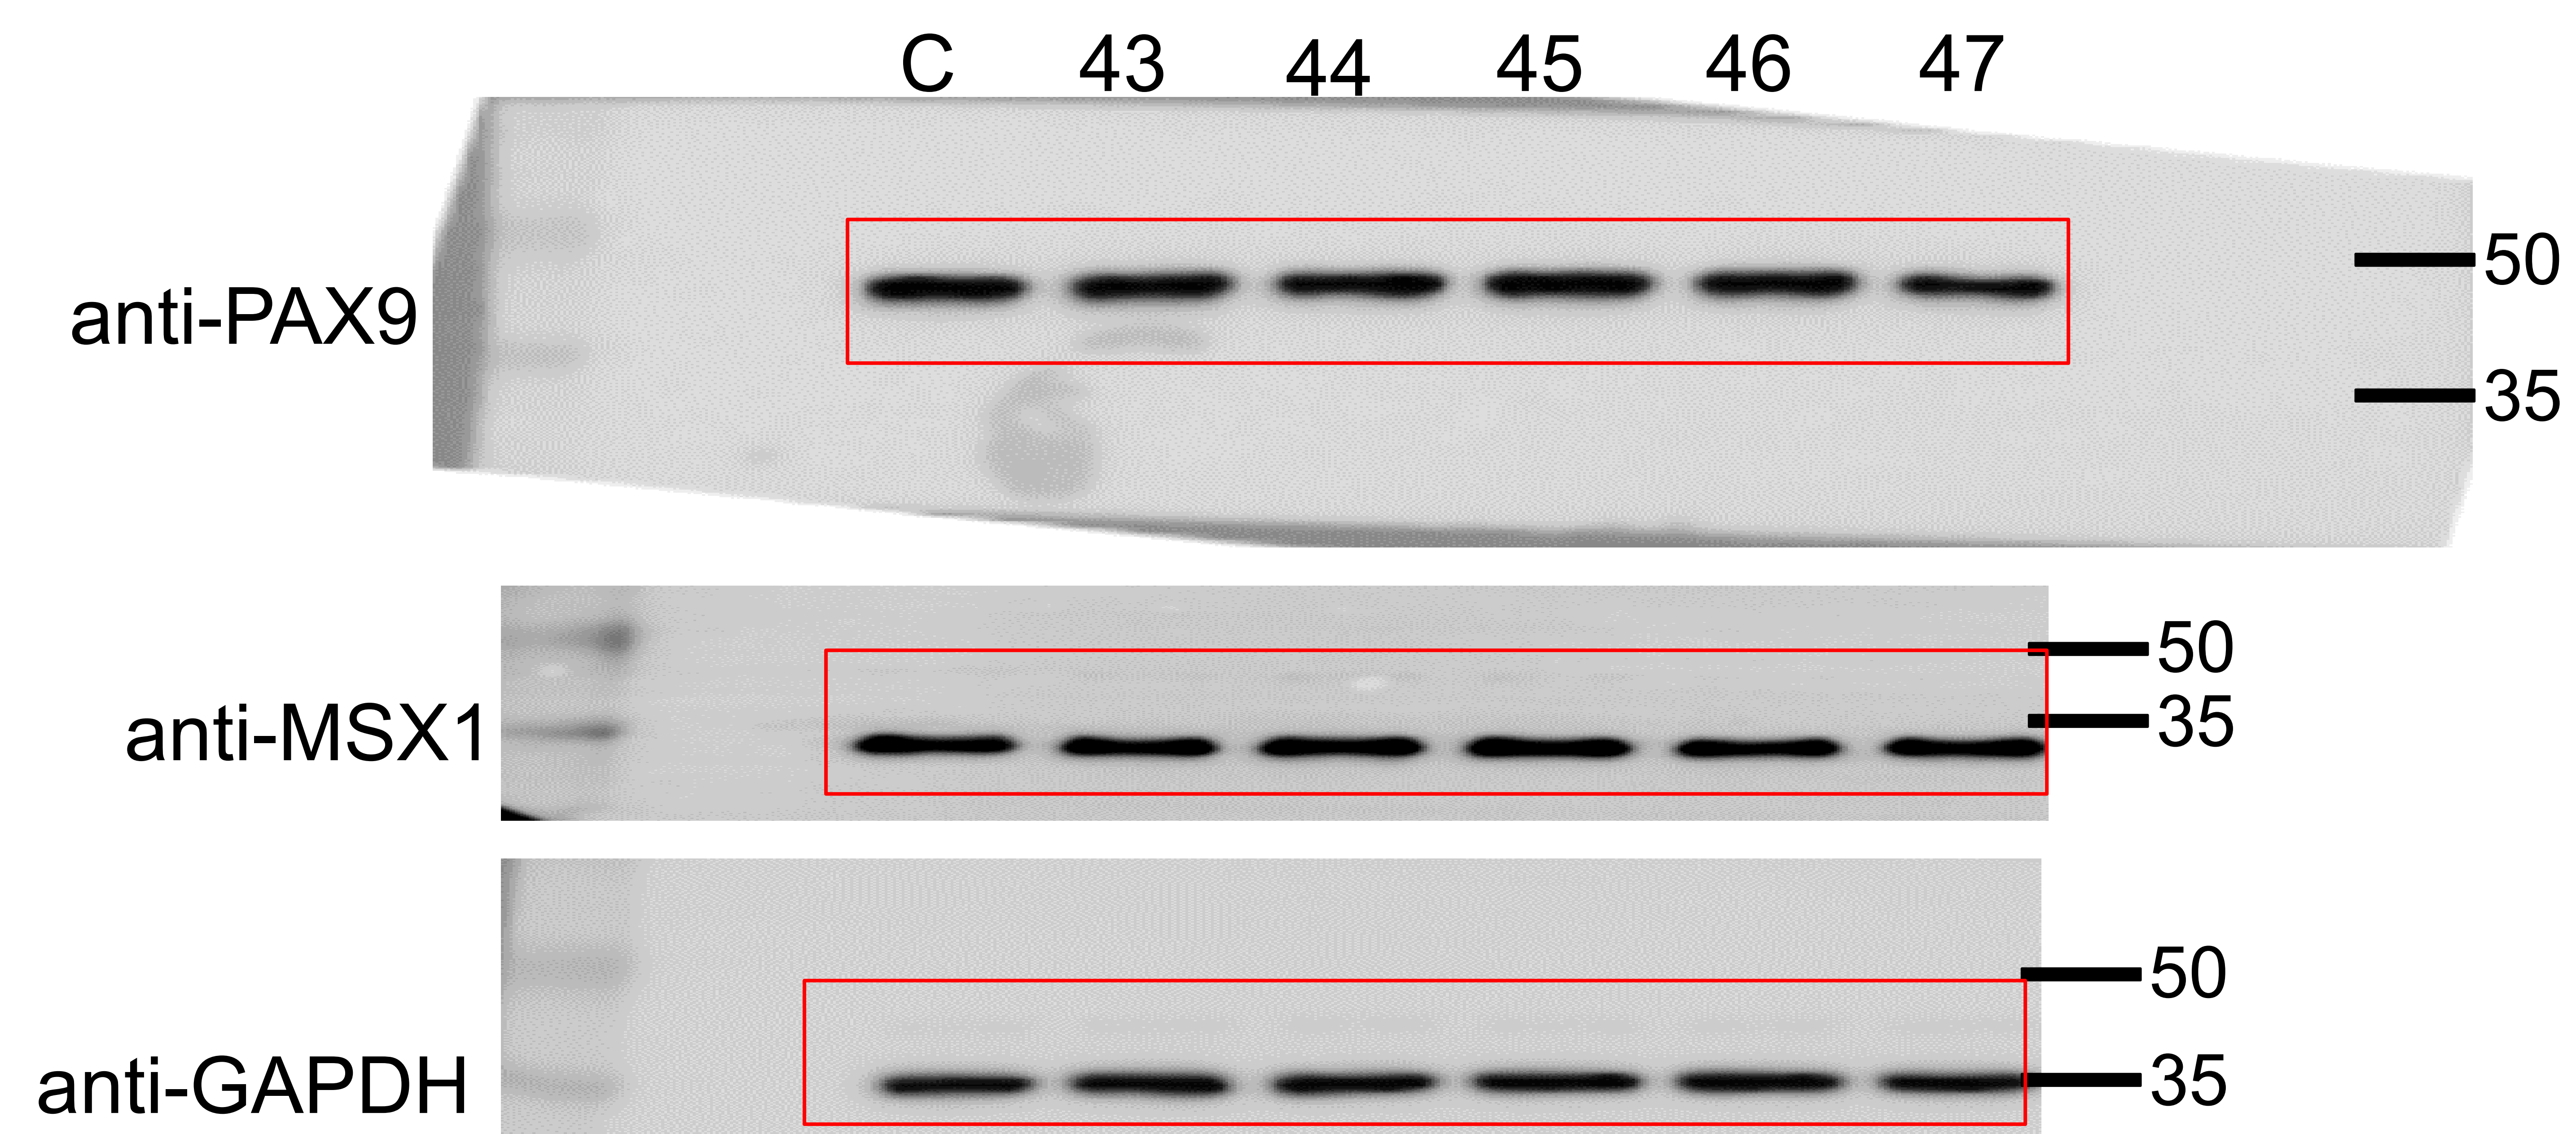

# Uncropped blots of Fig. 1

## B

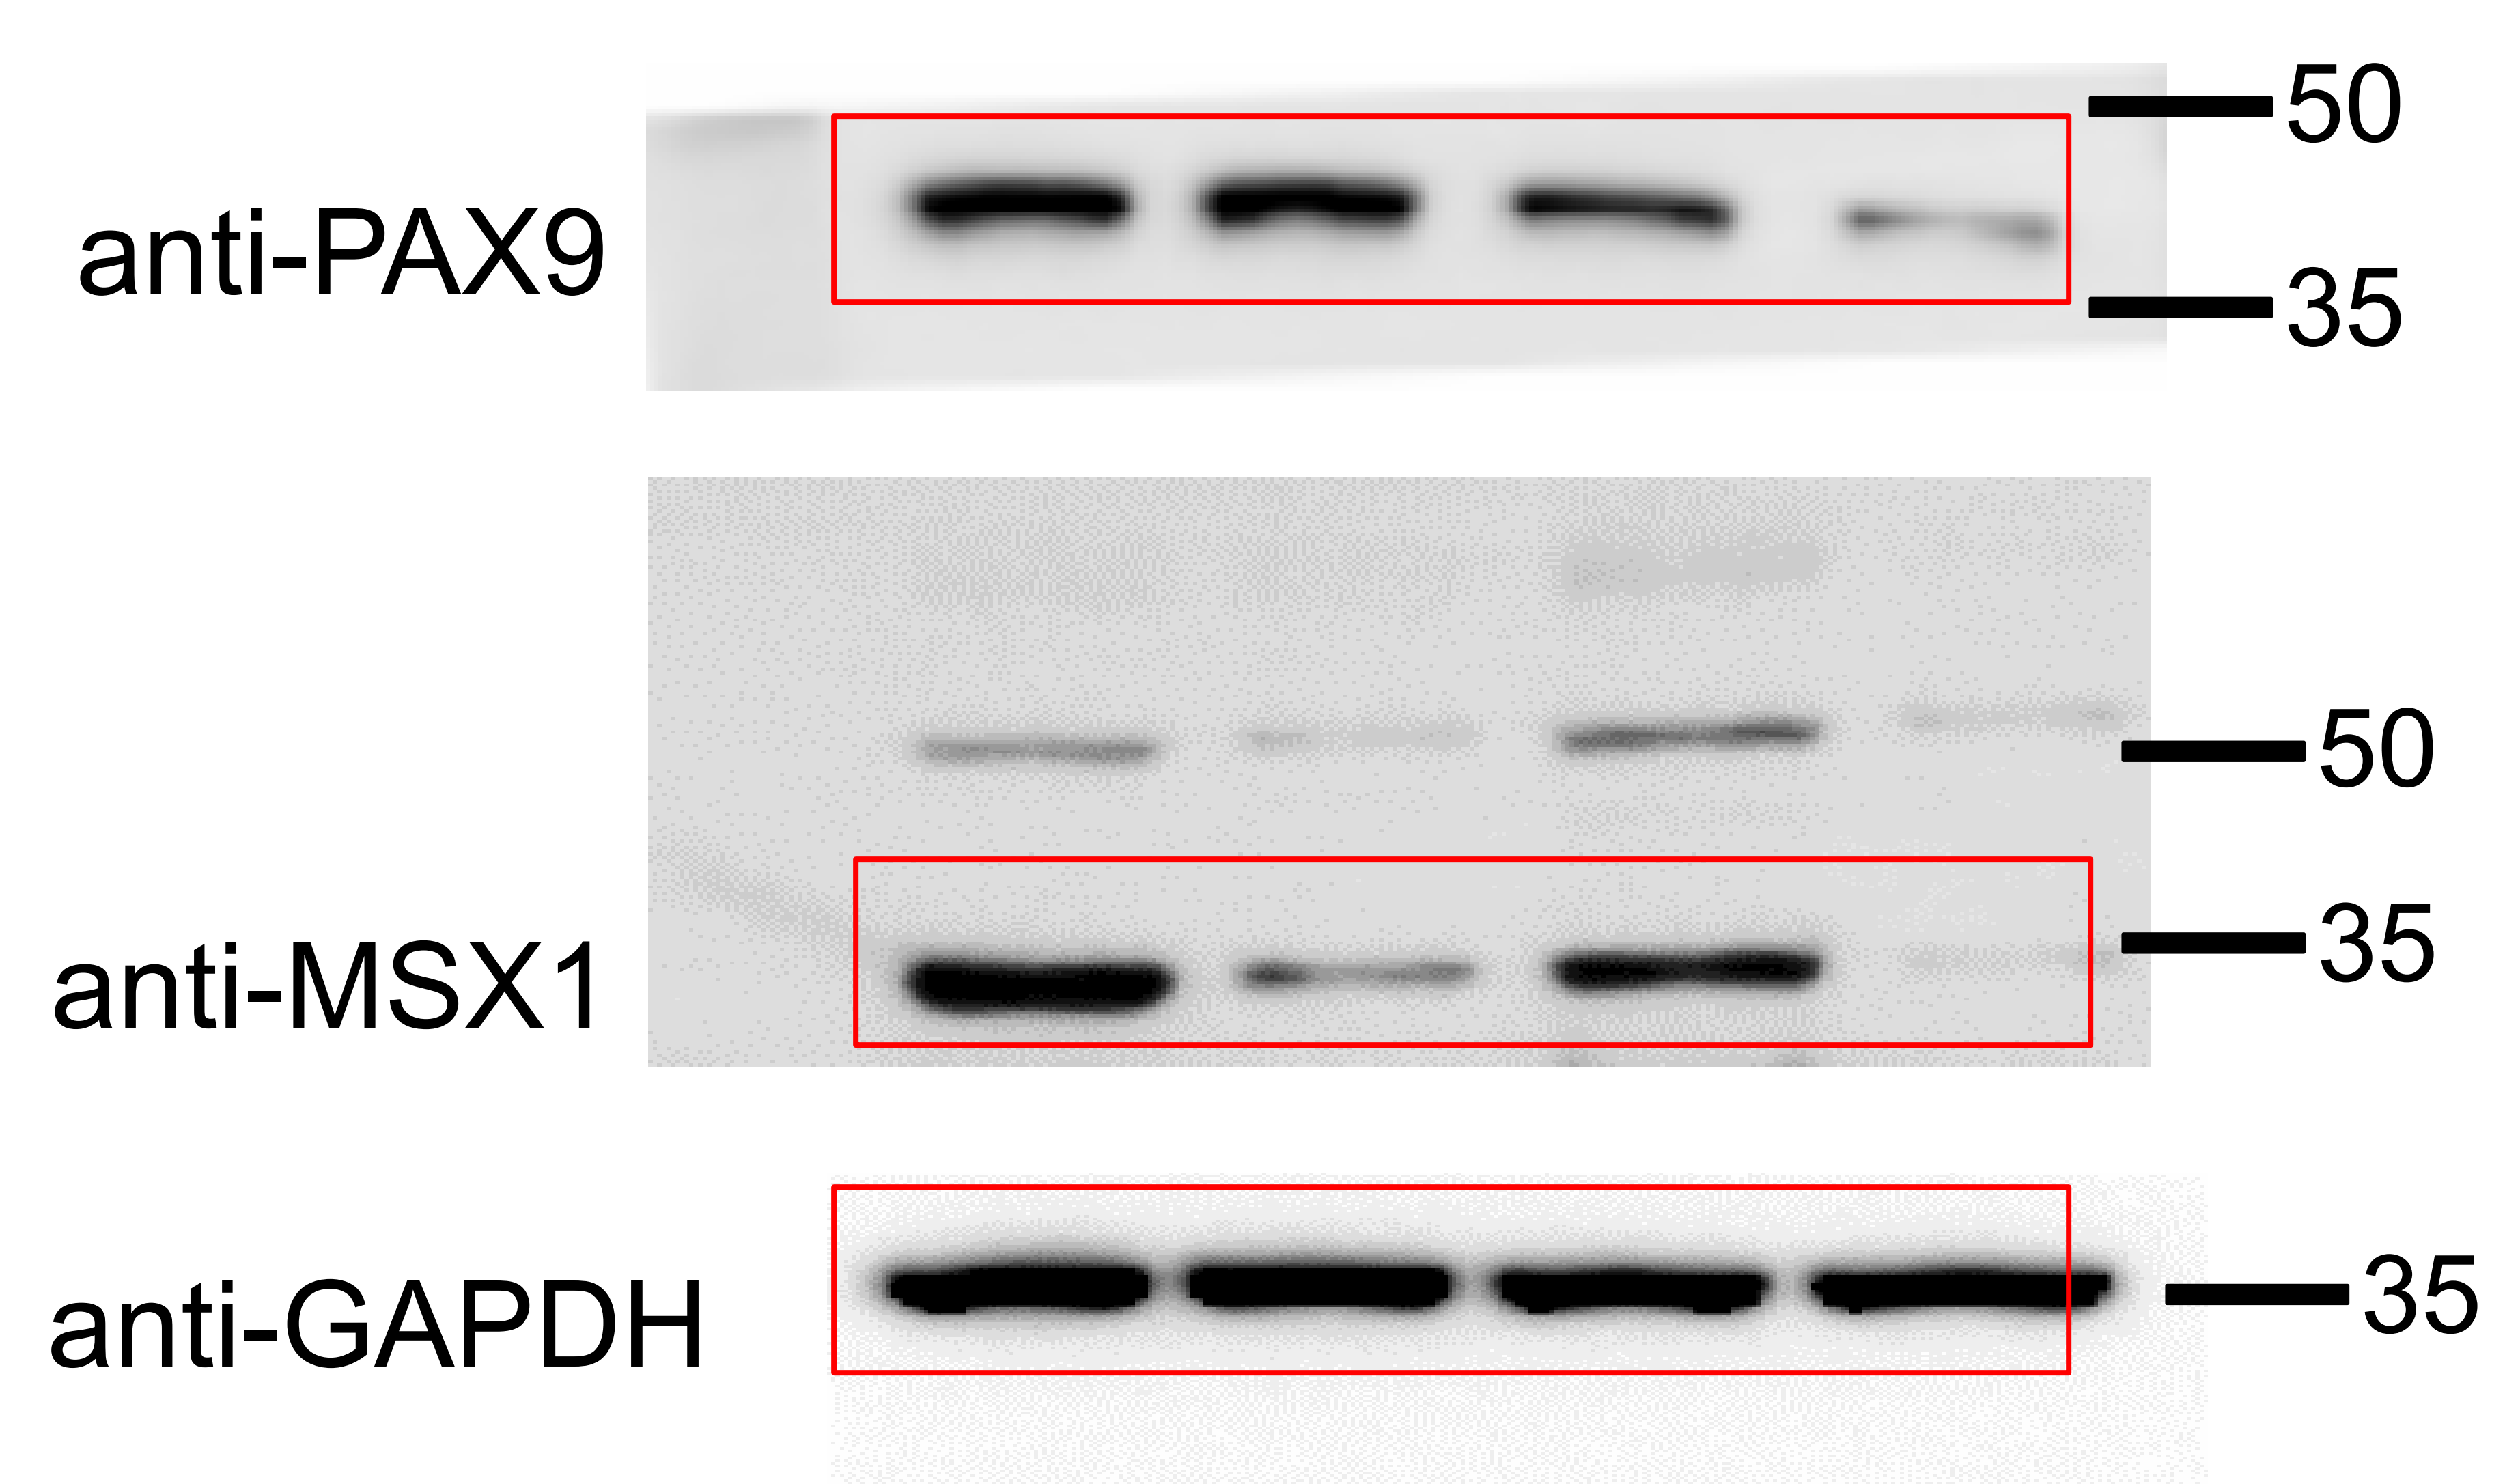

## C

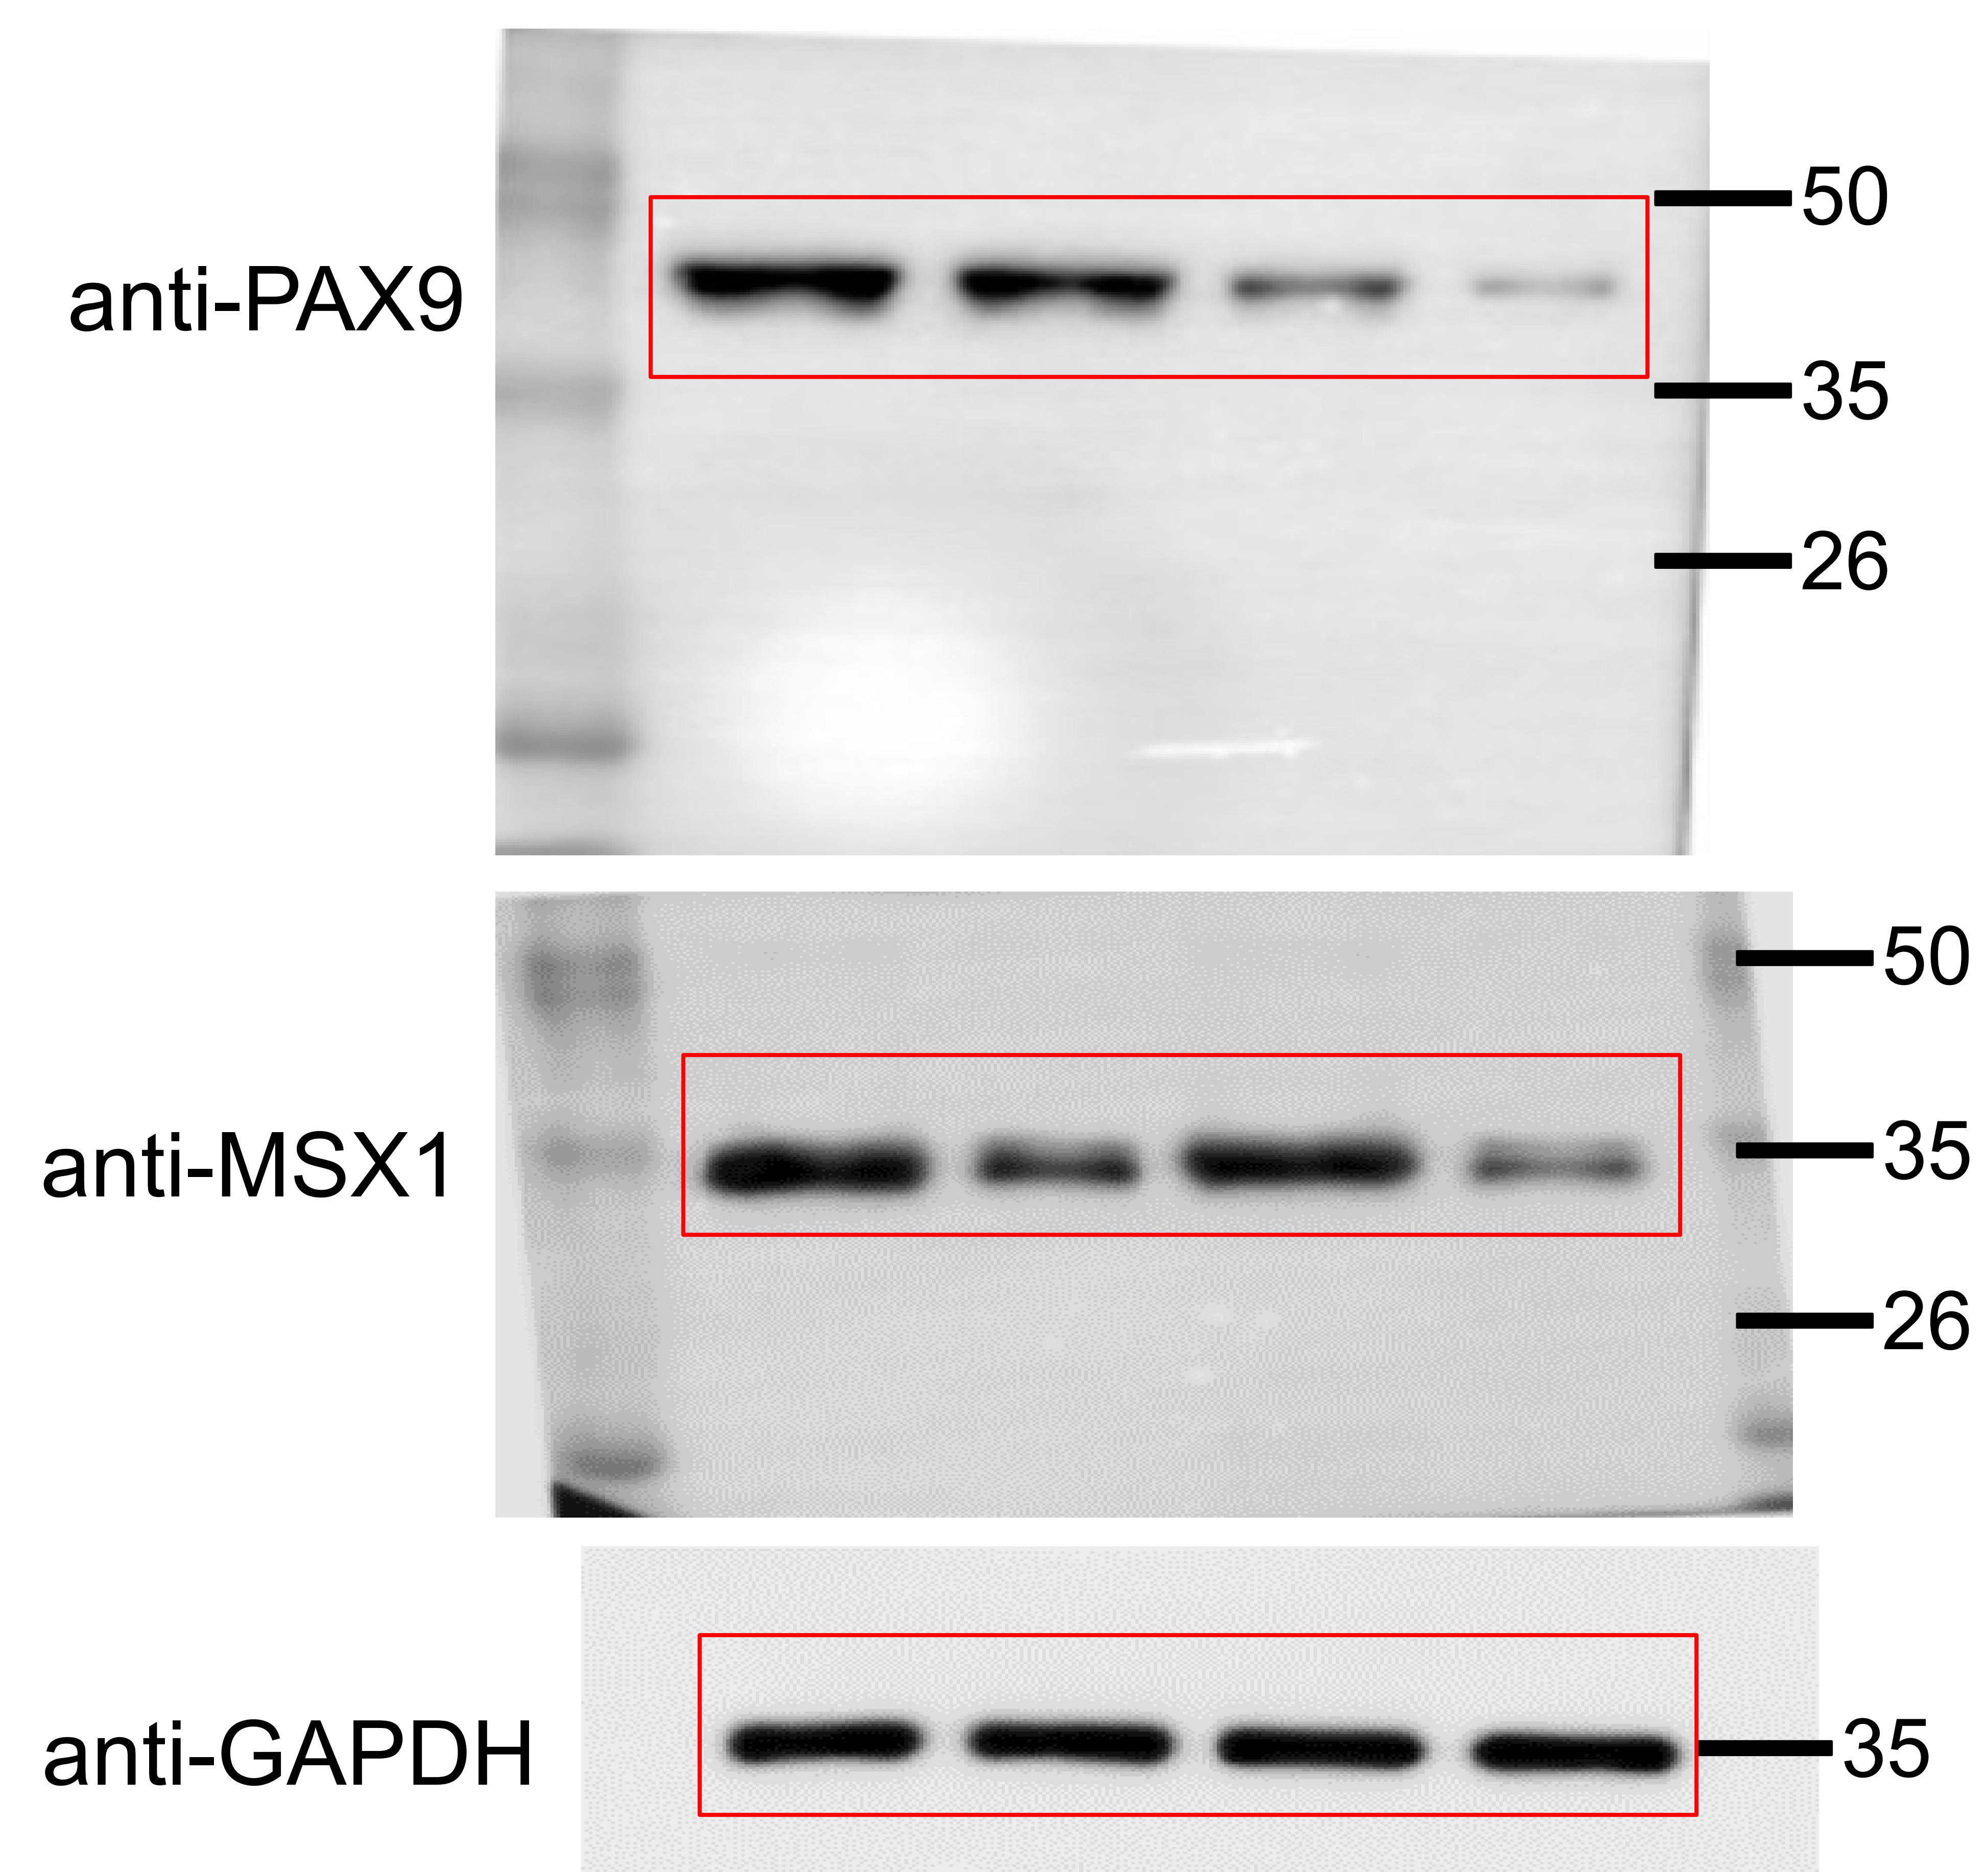

# Uncropped blots of Fig. 2

## A

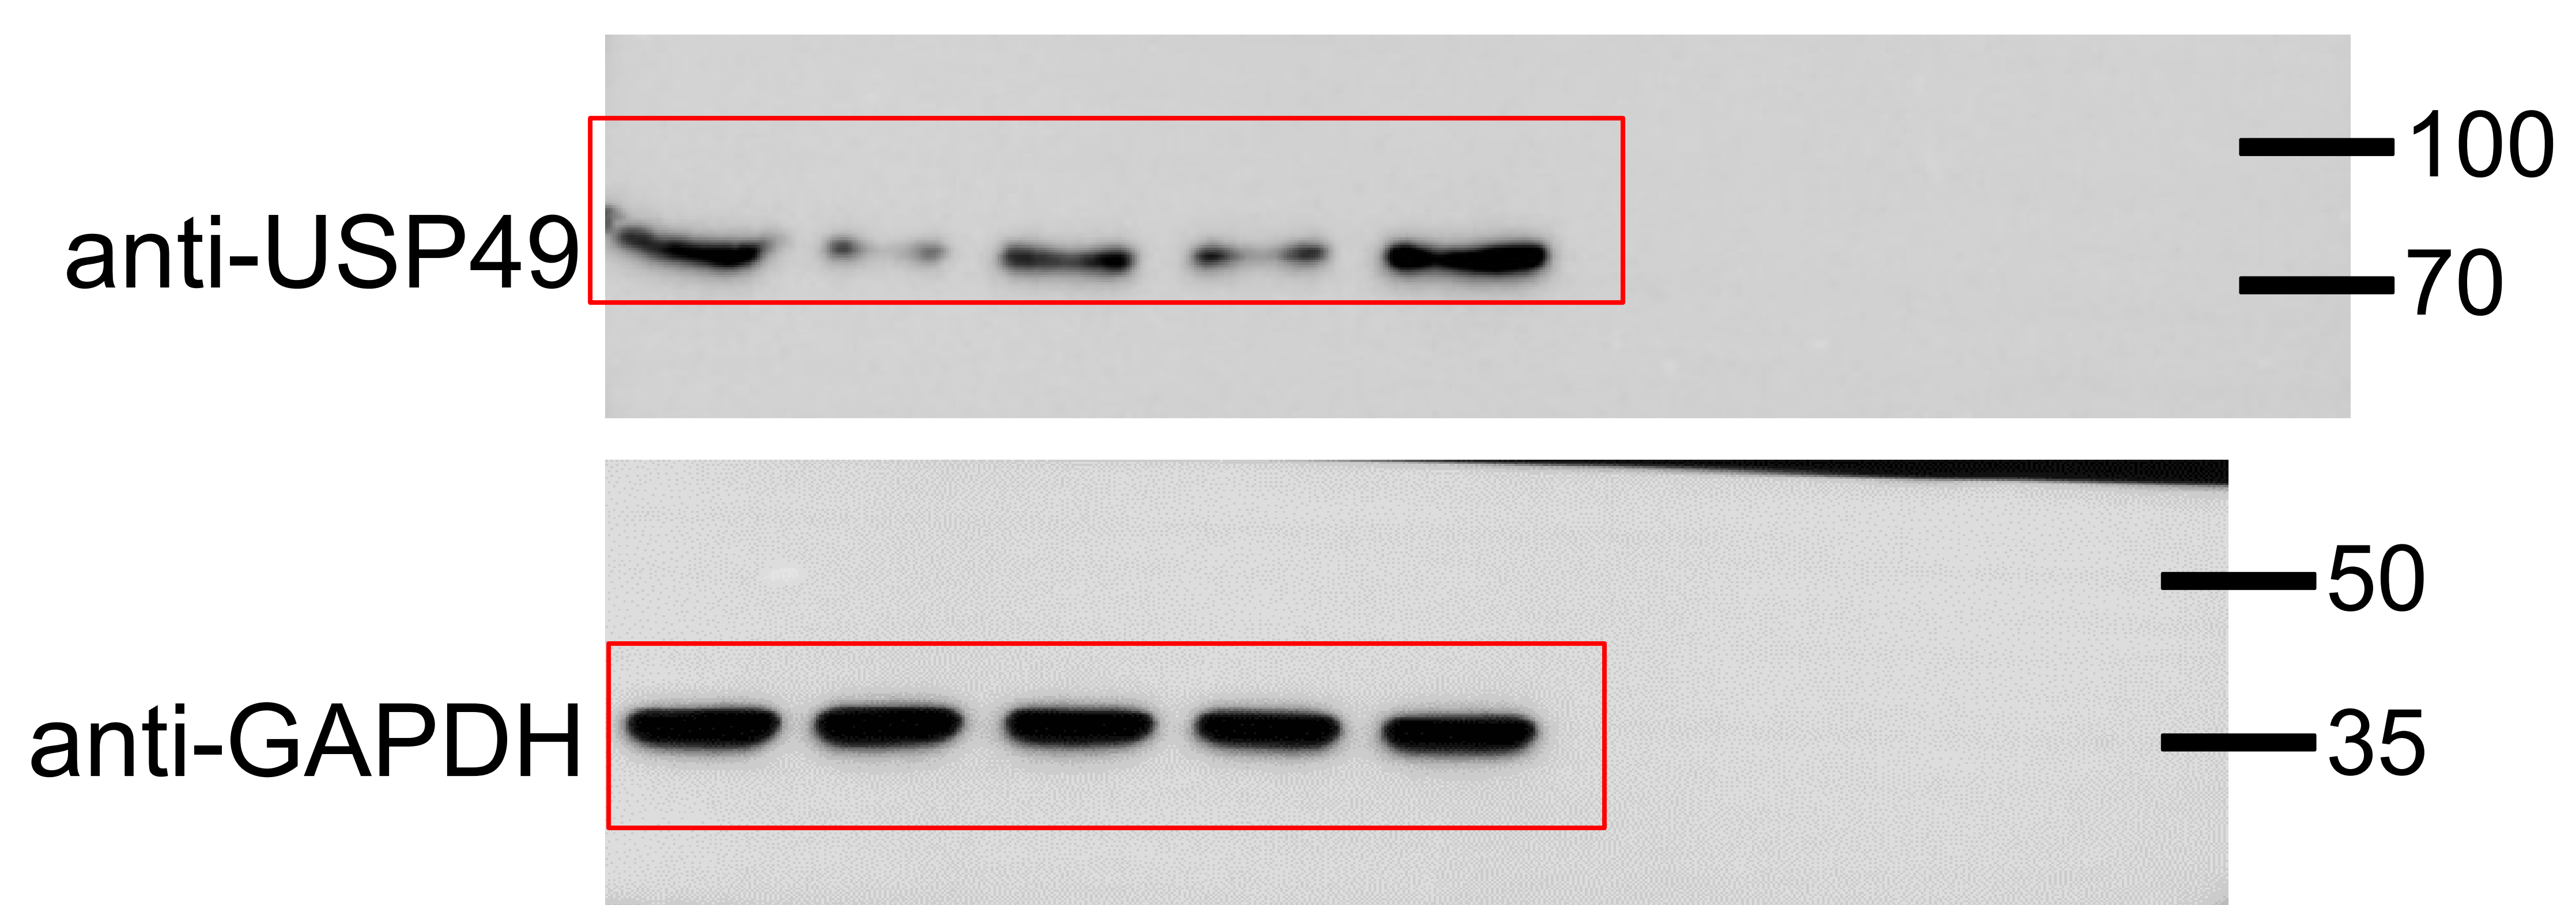

## B

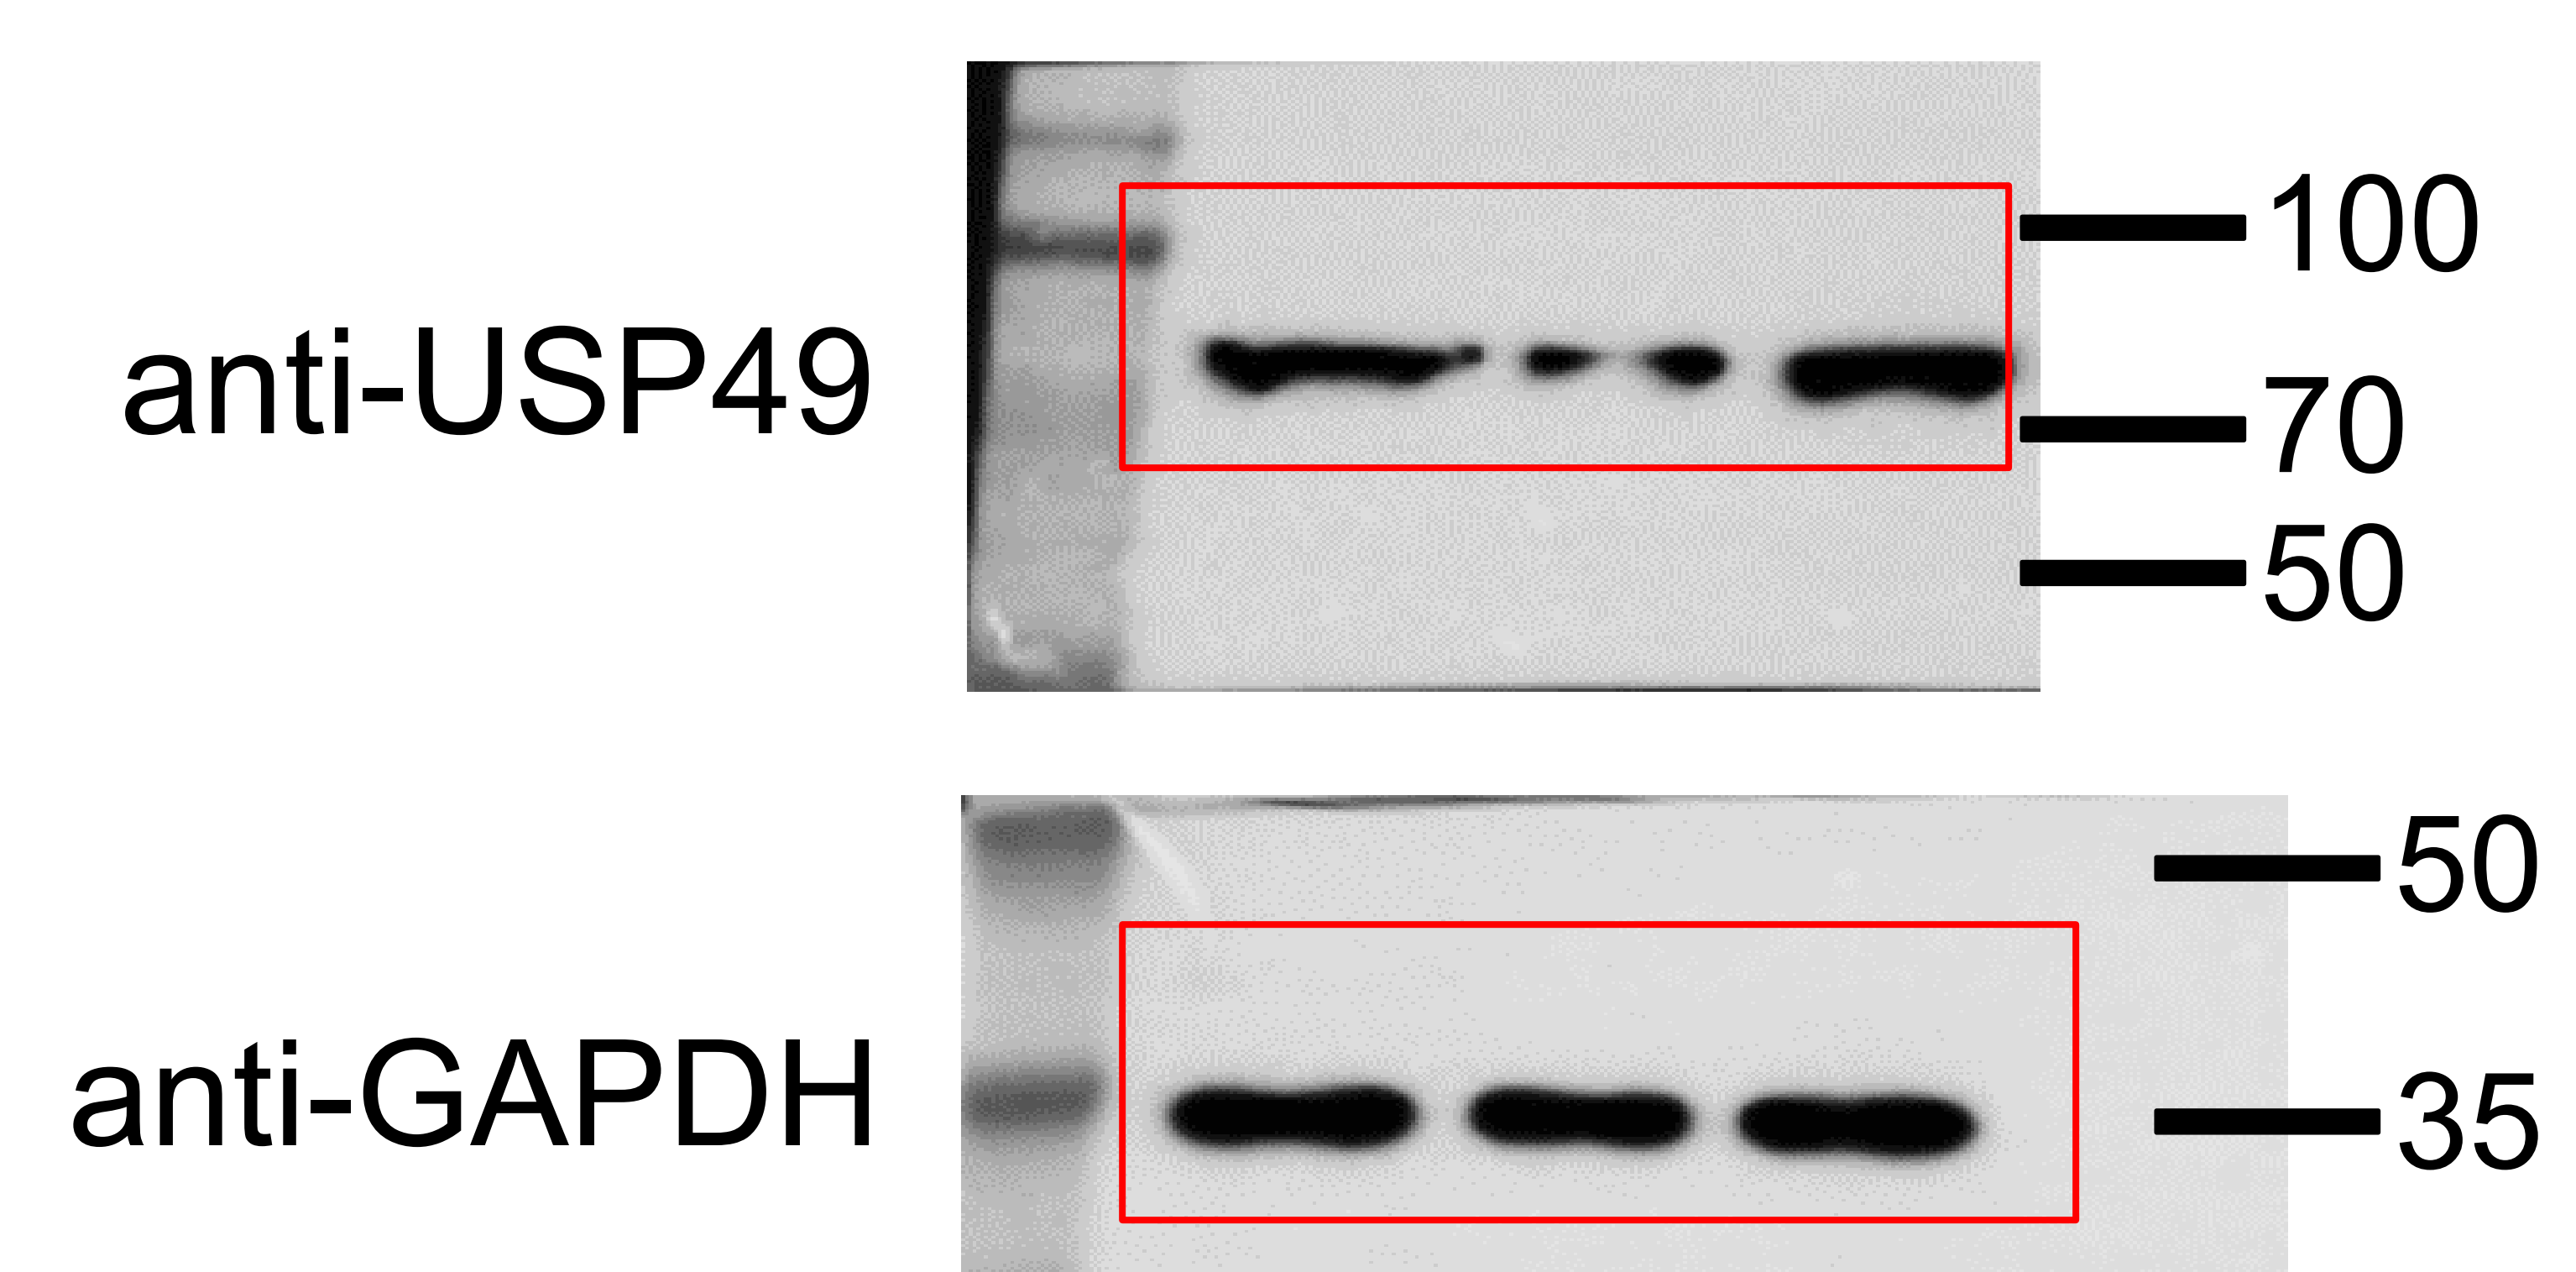

## C

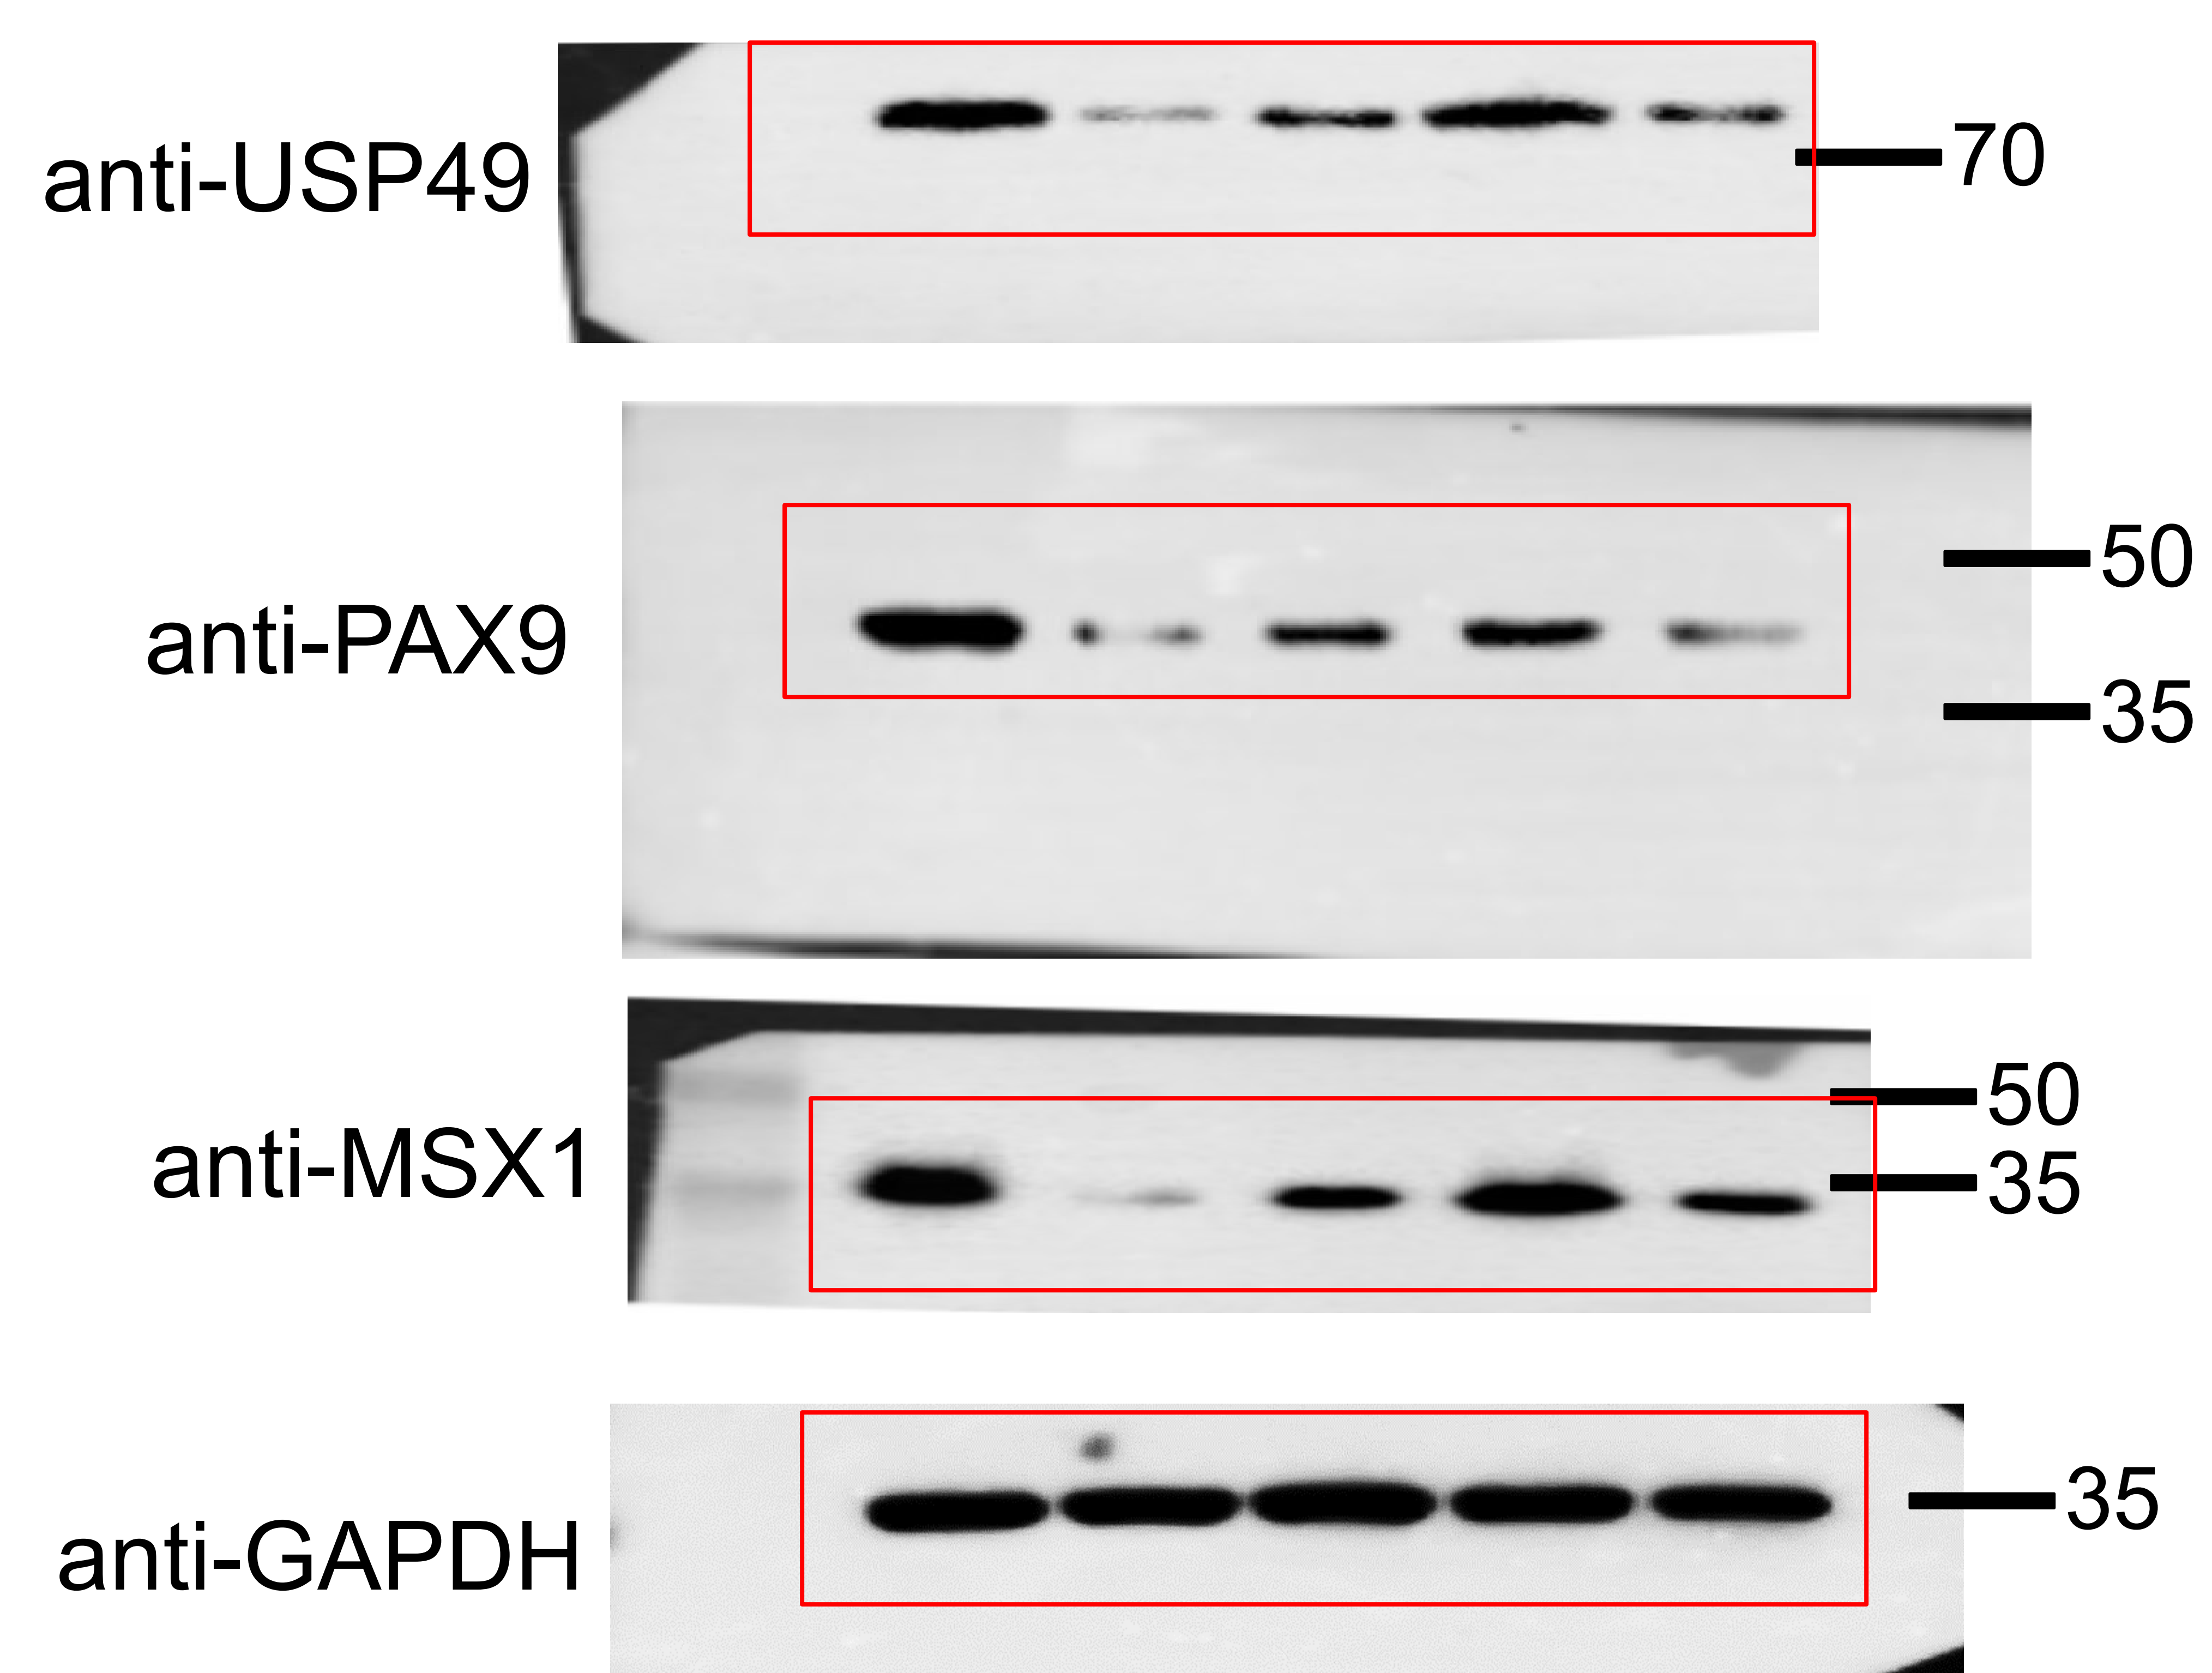

## D

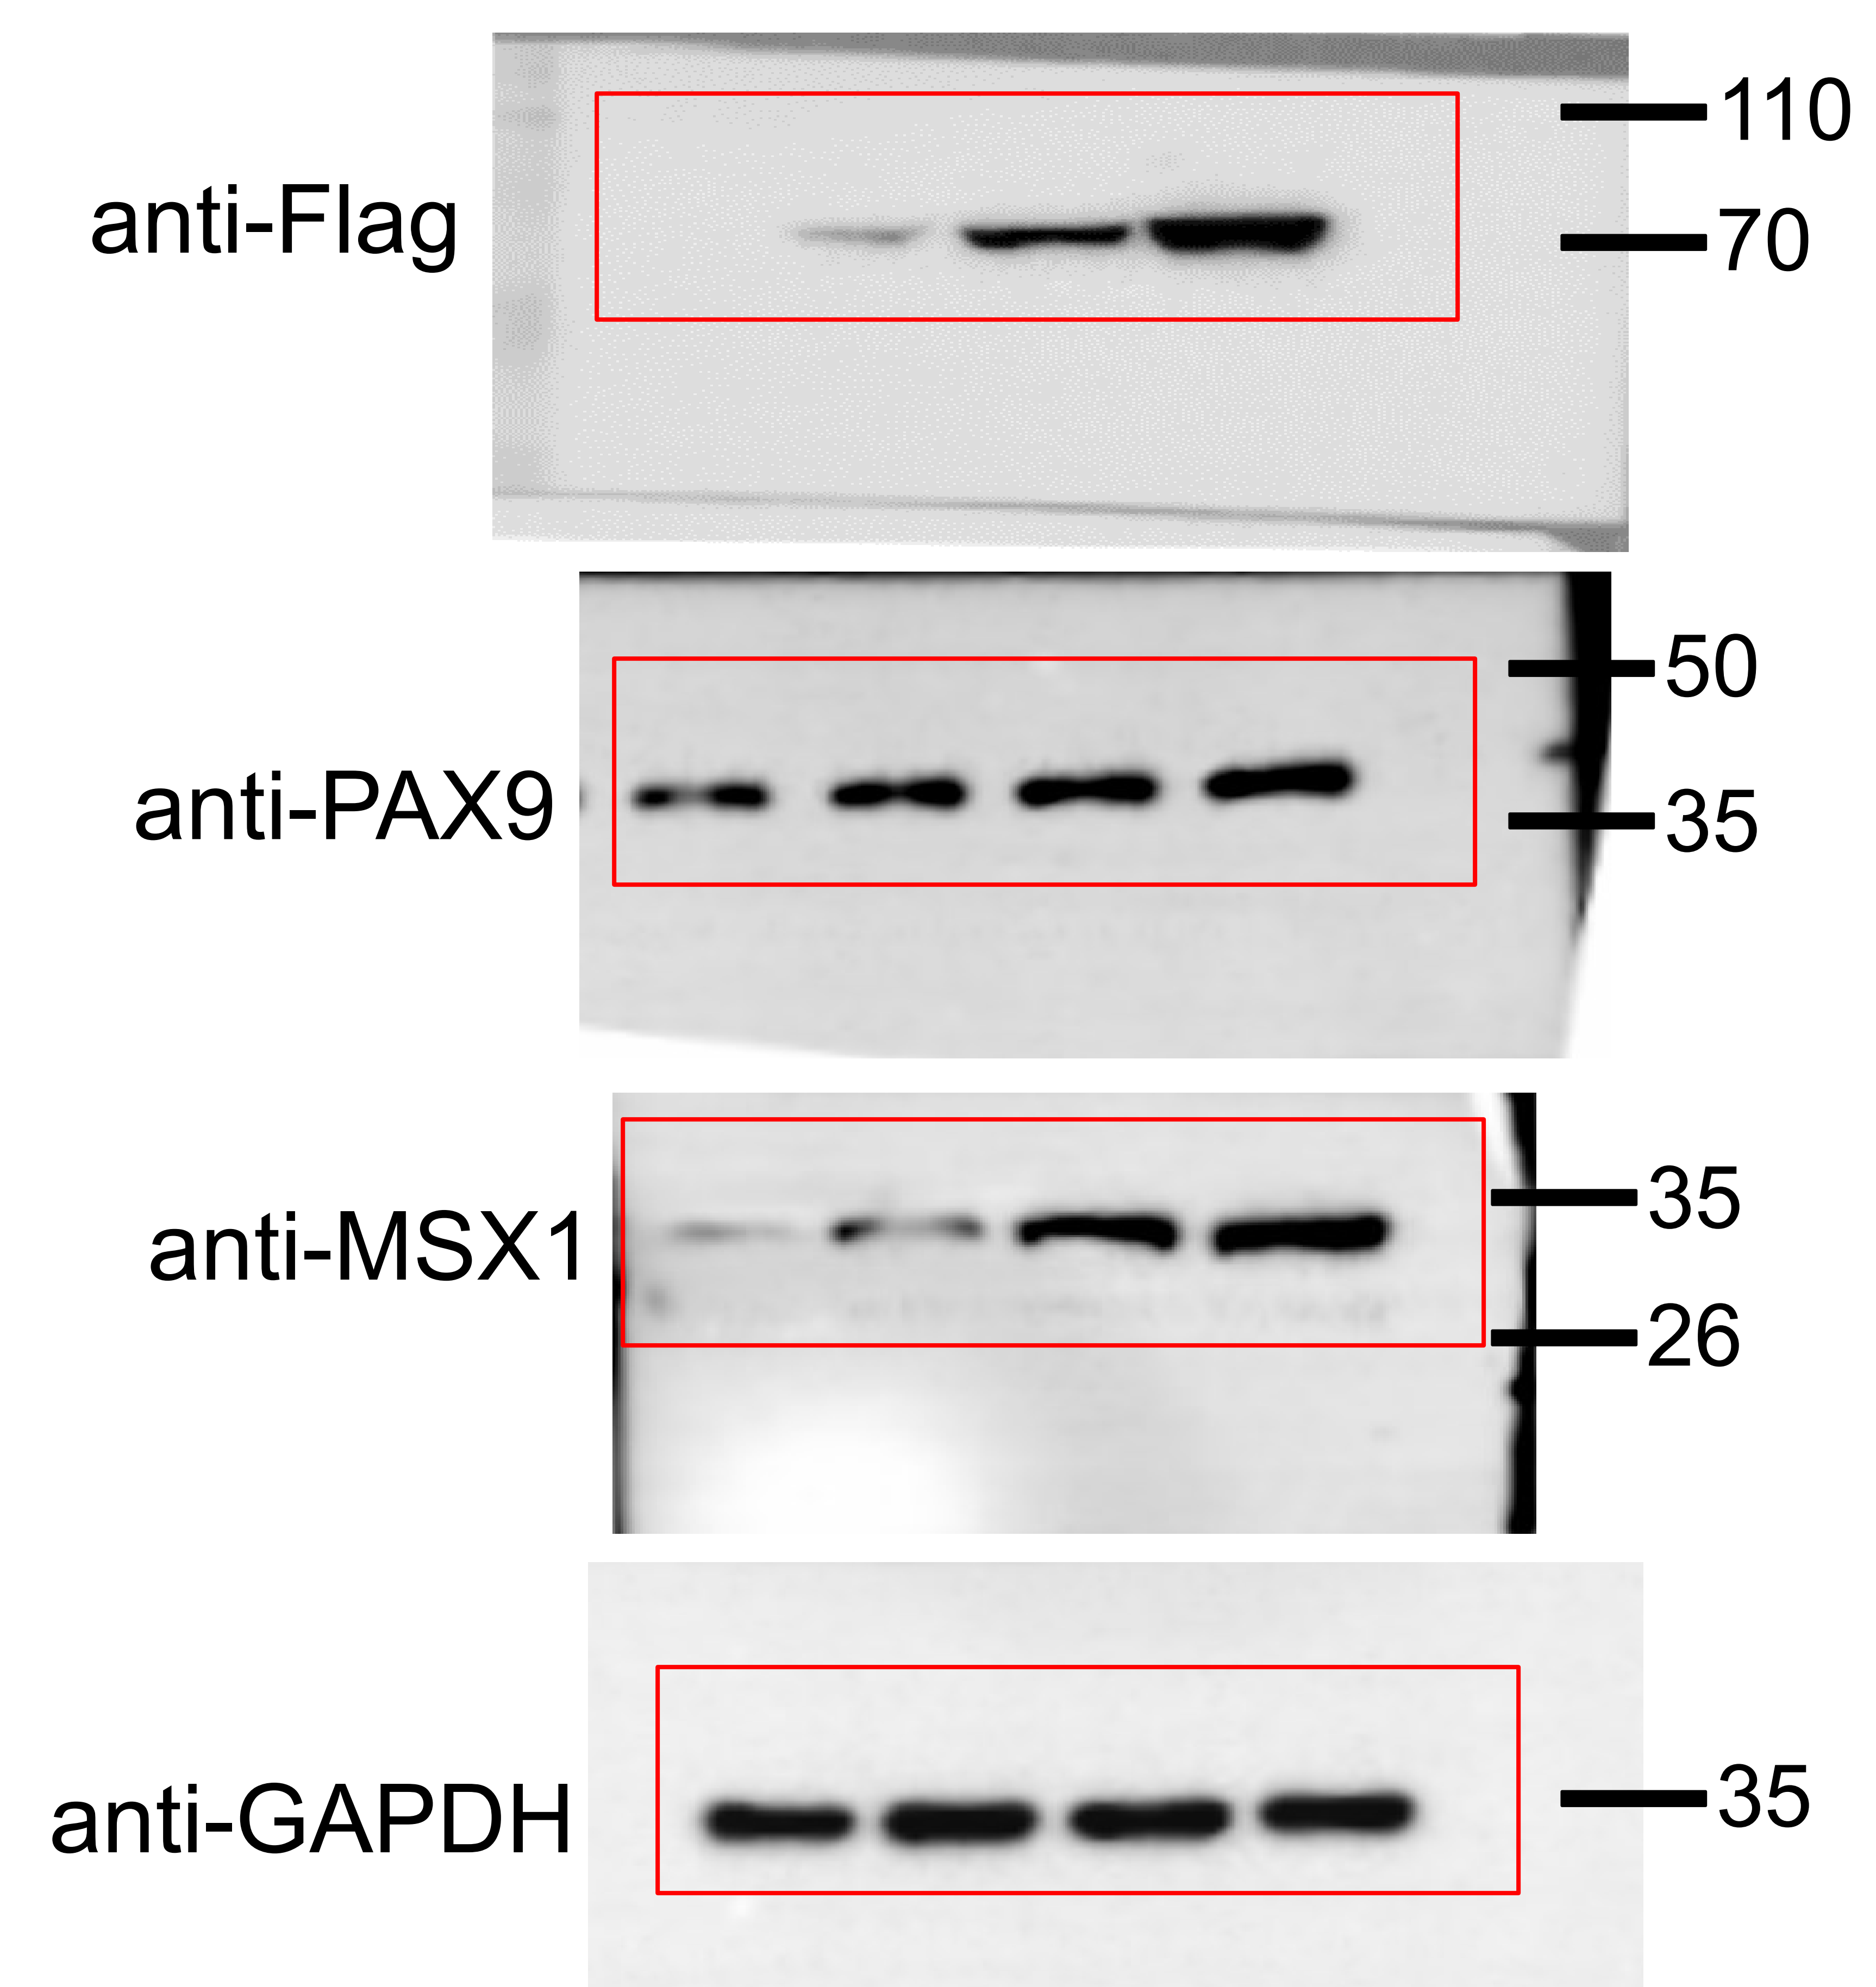

# Uncropped blots of Fig. 2

## E

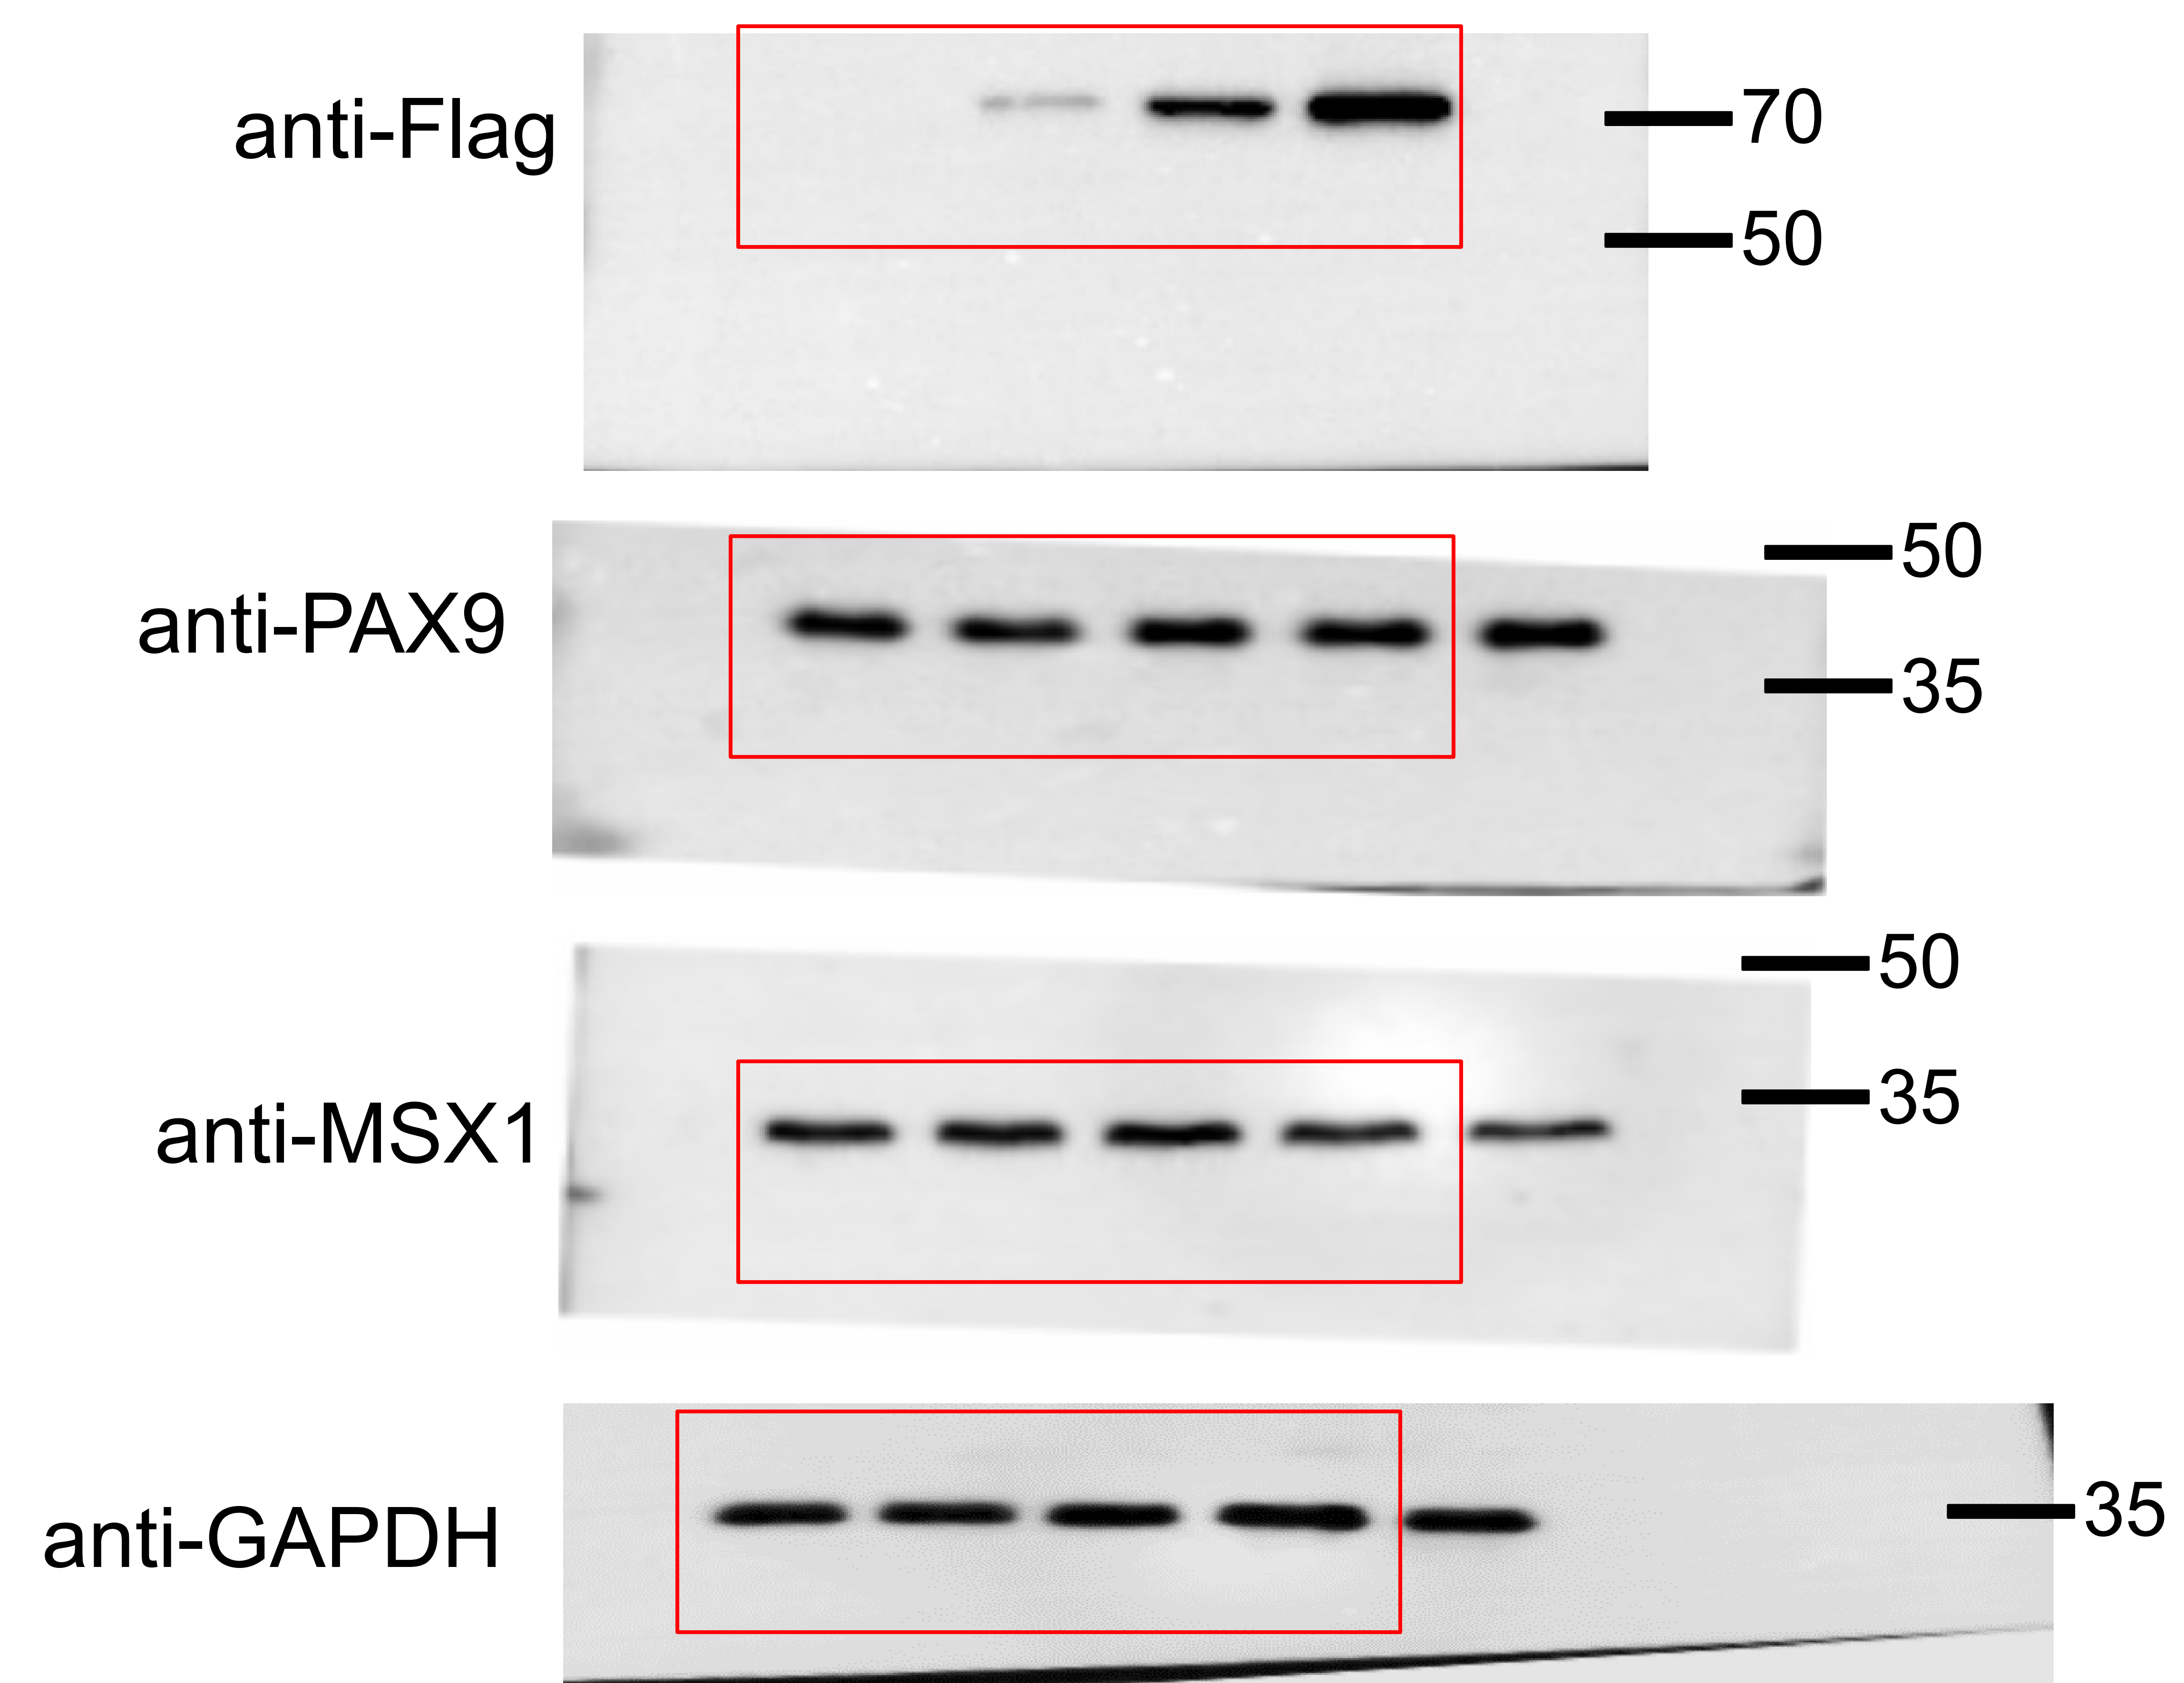

## F

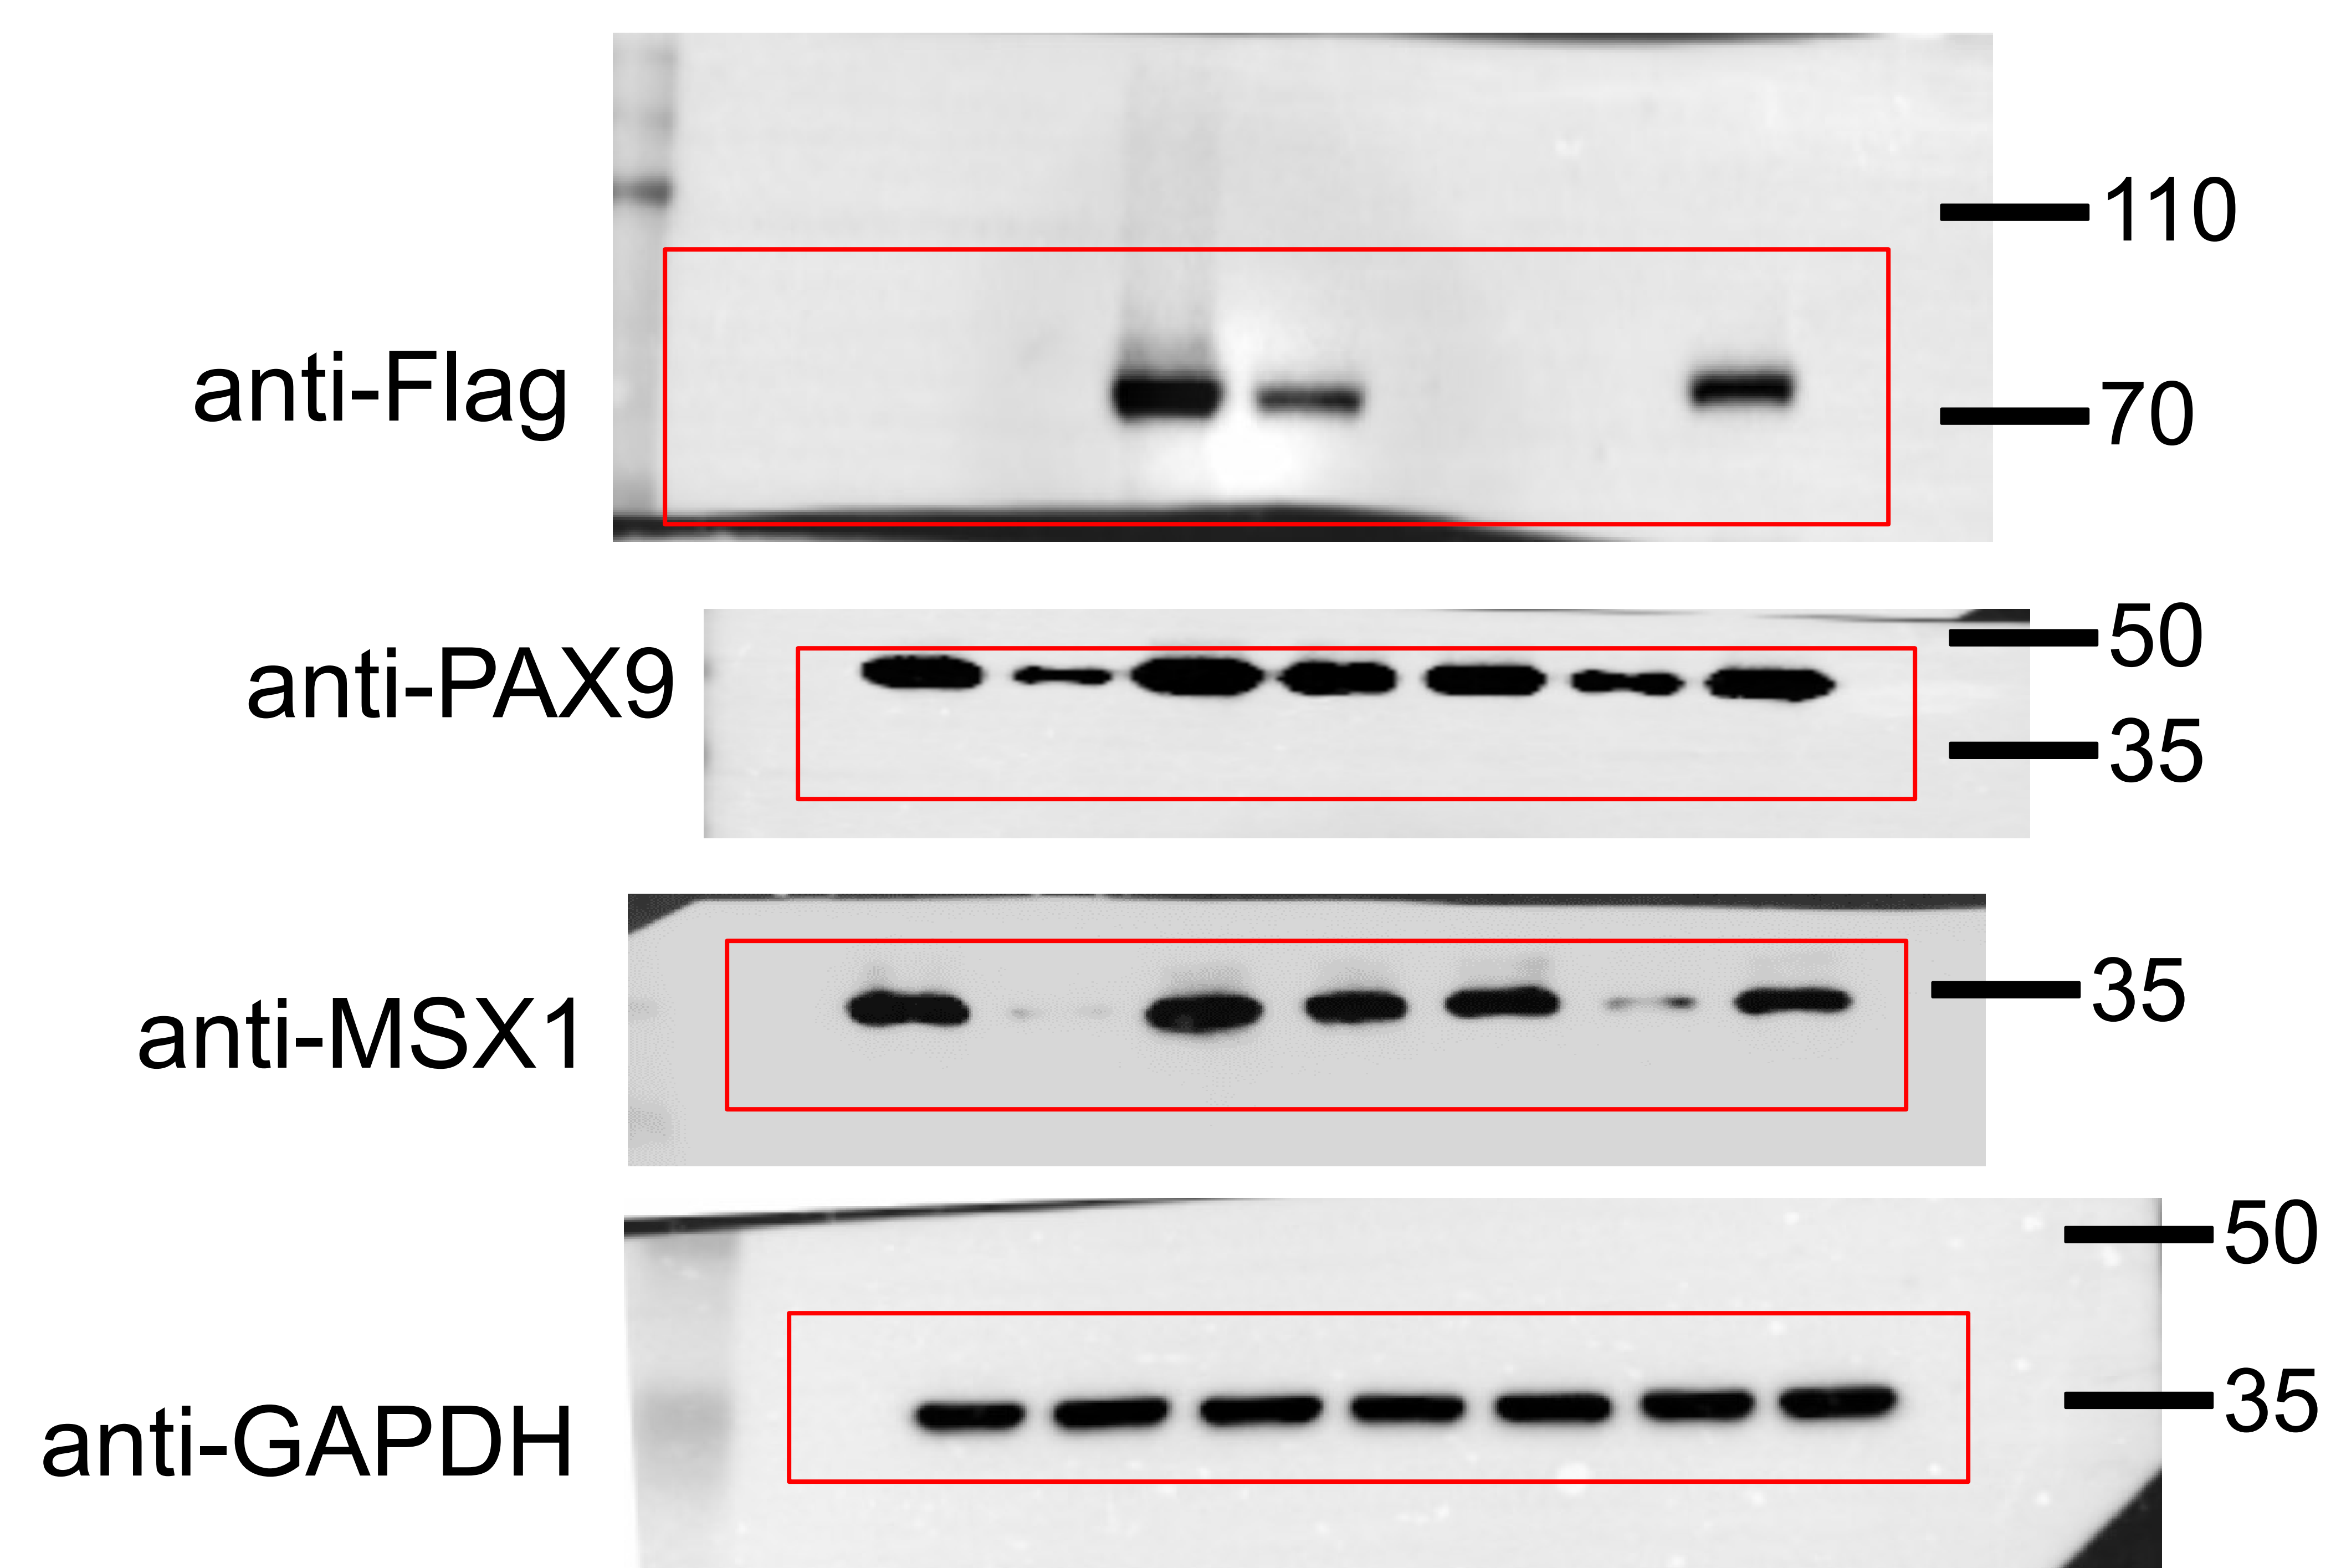

# Uncropped blots of Fig. 3

## A

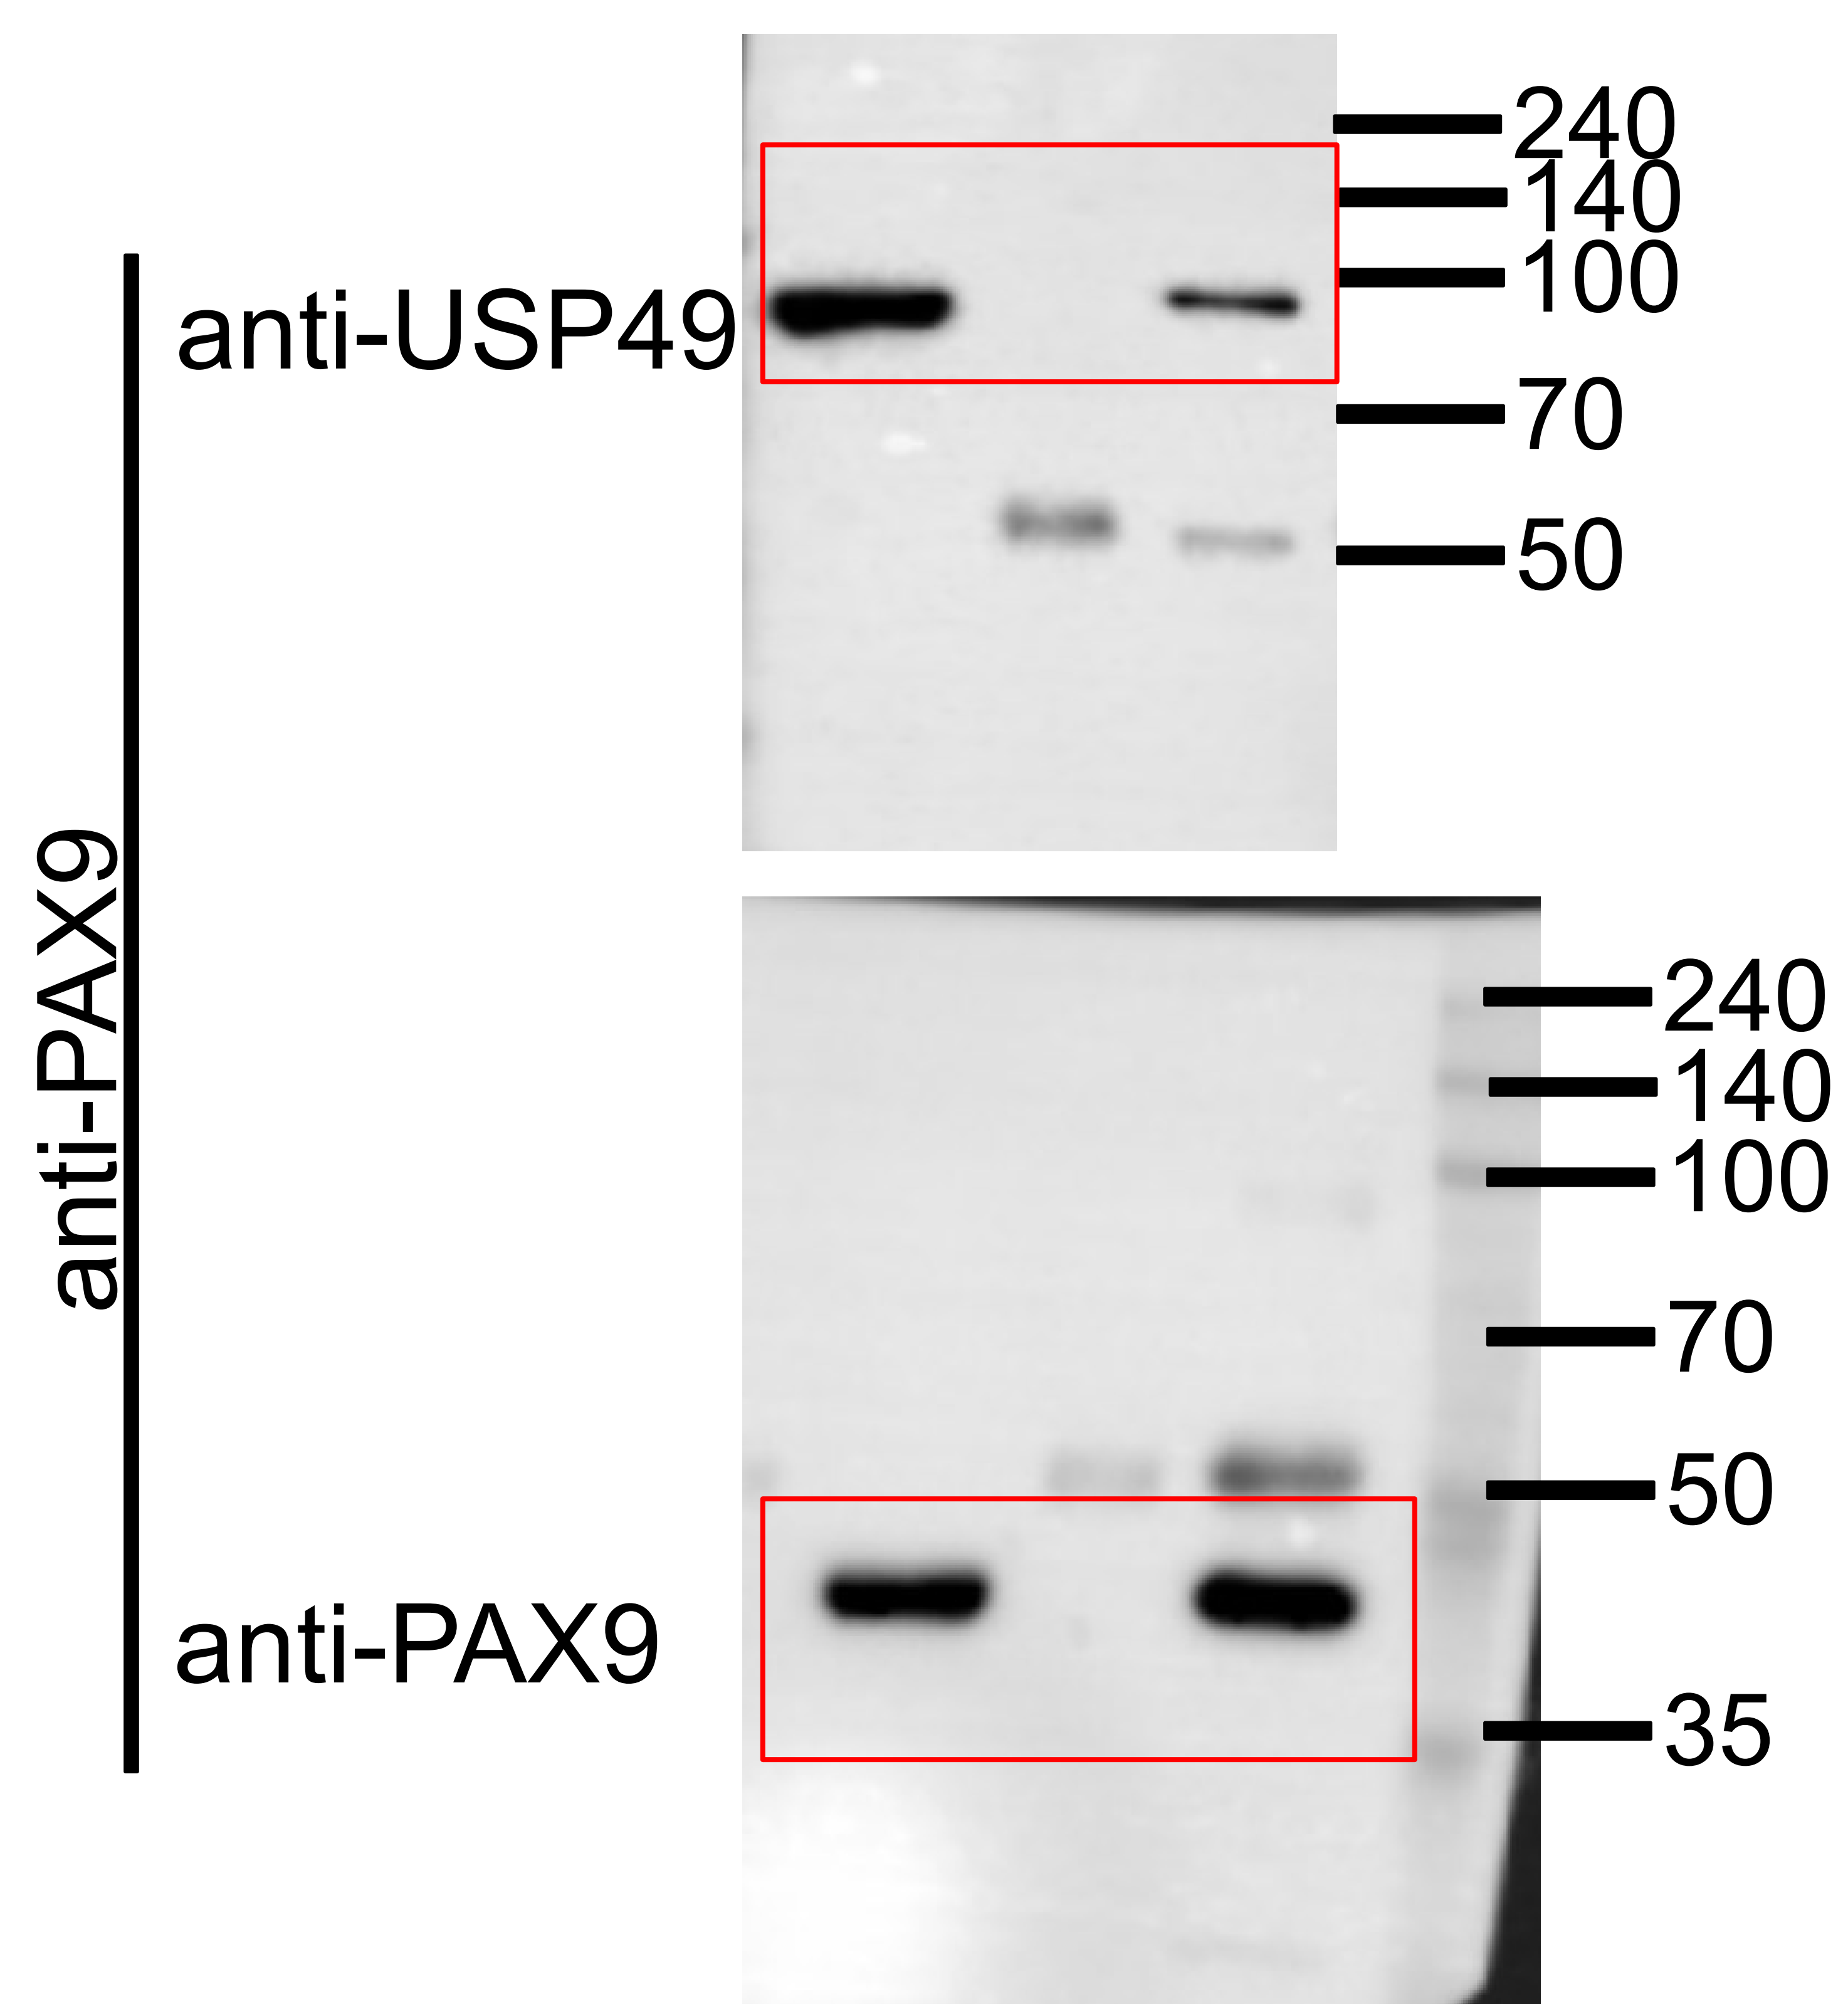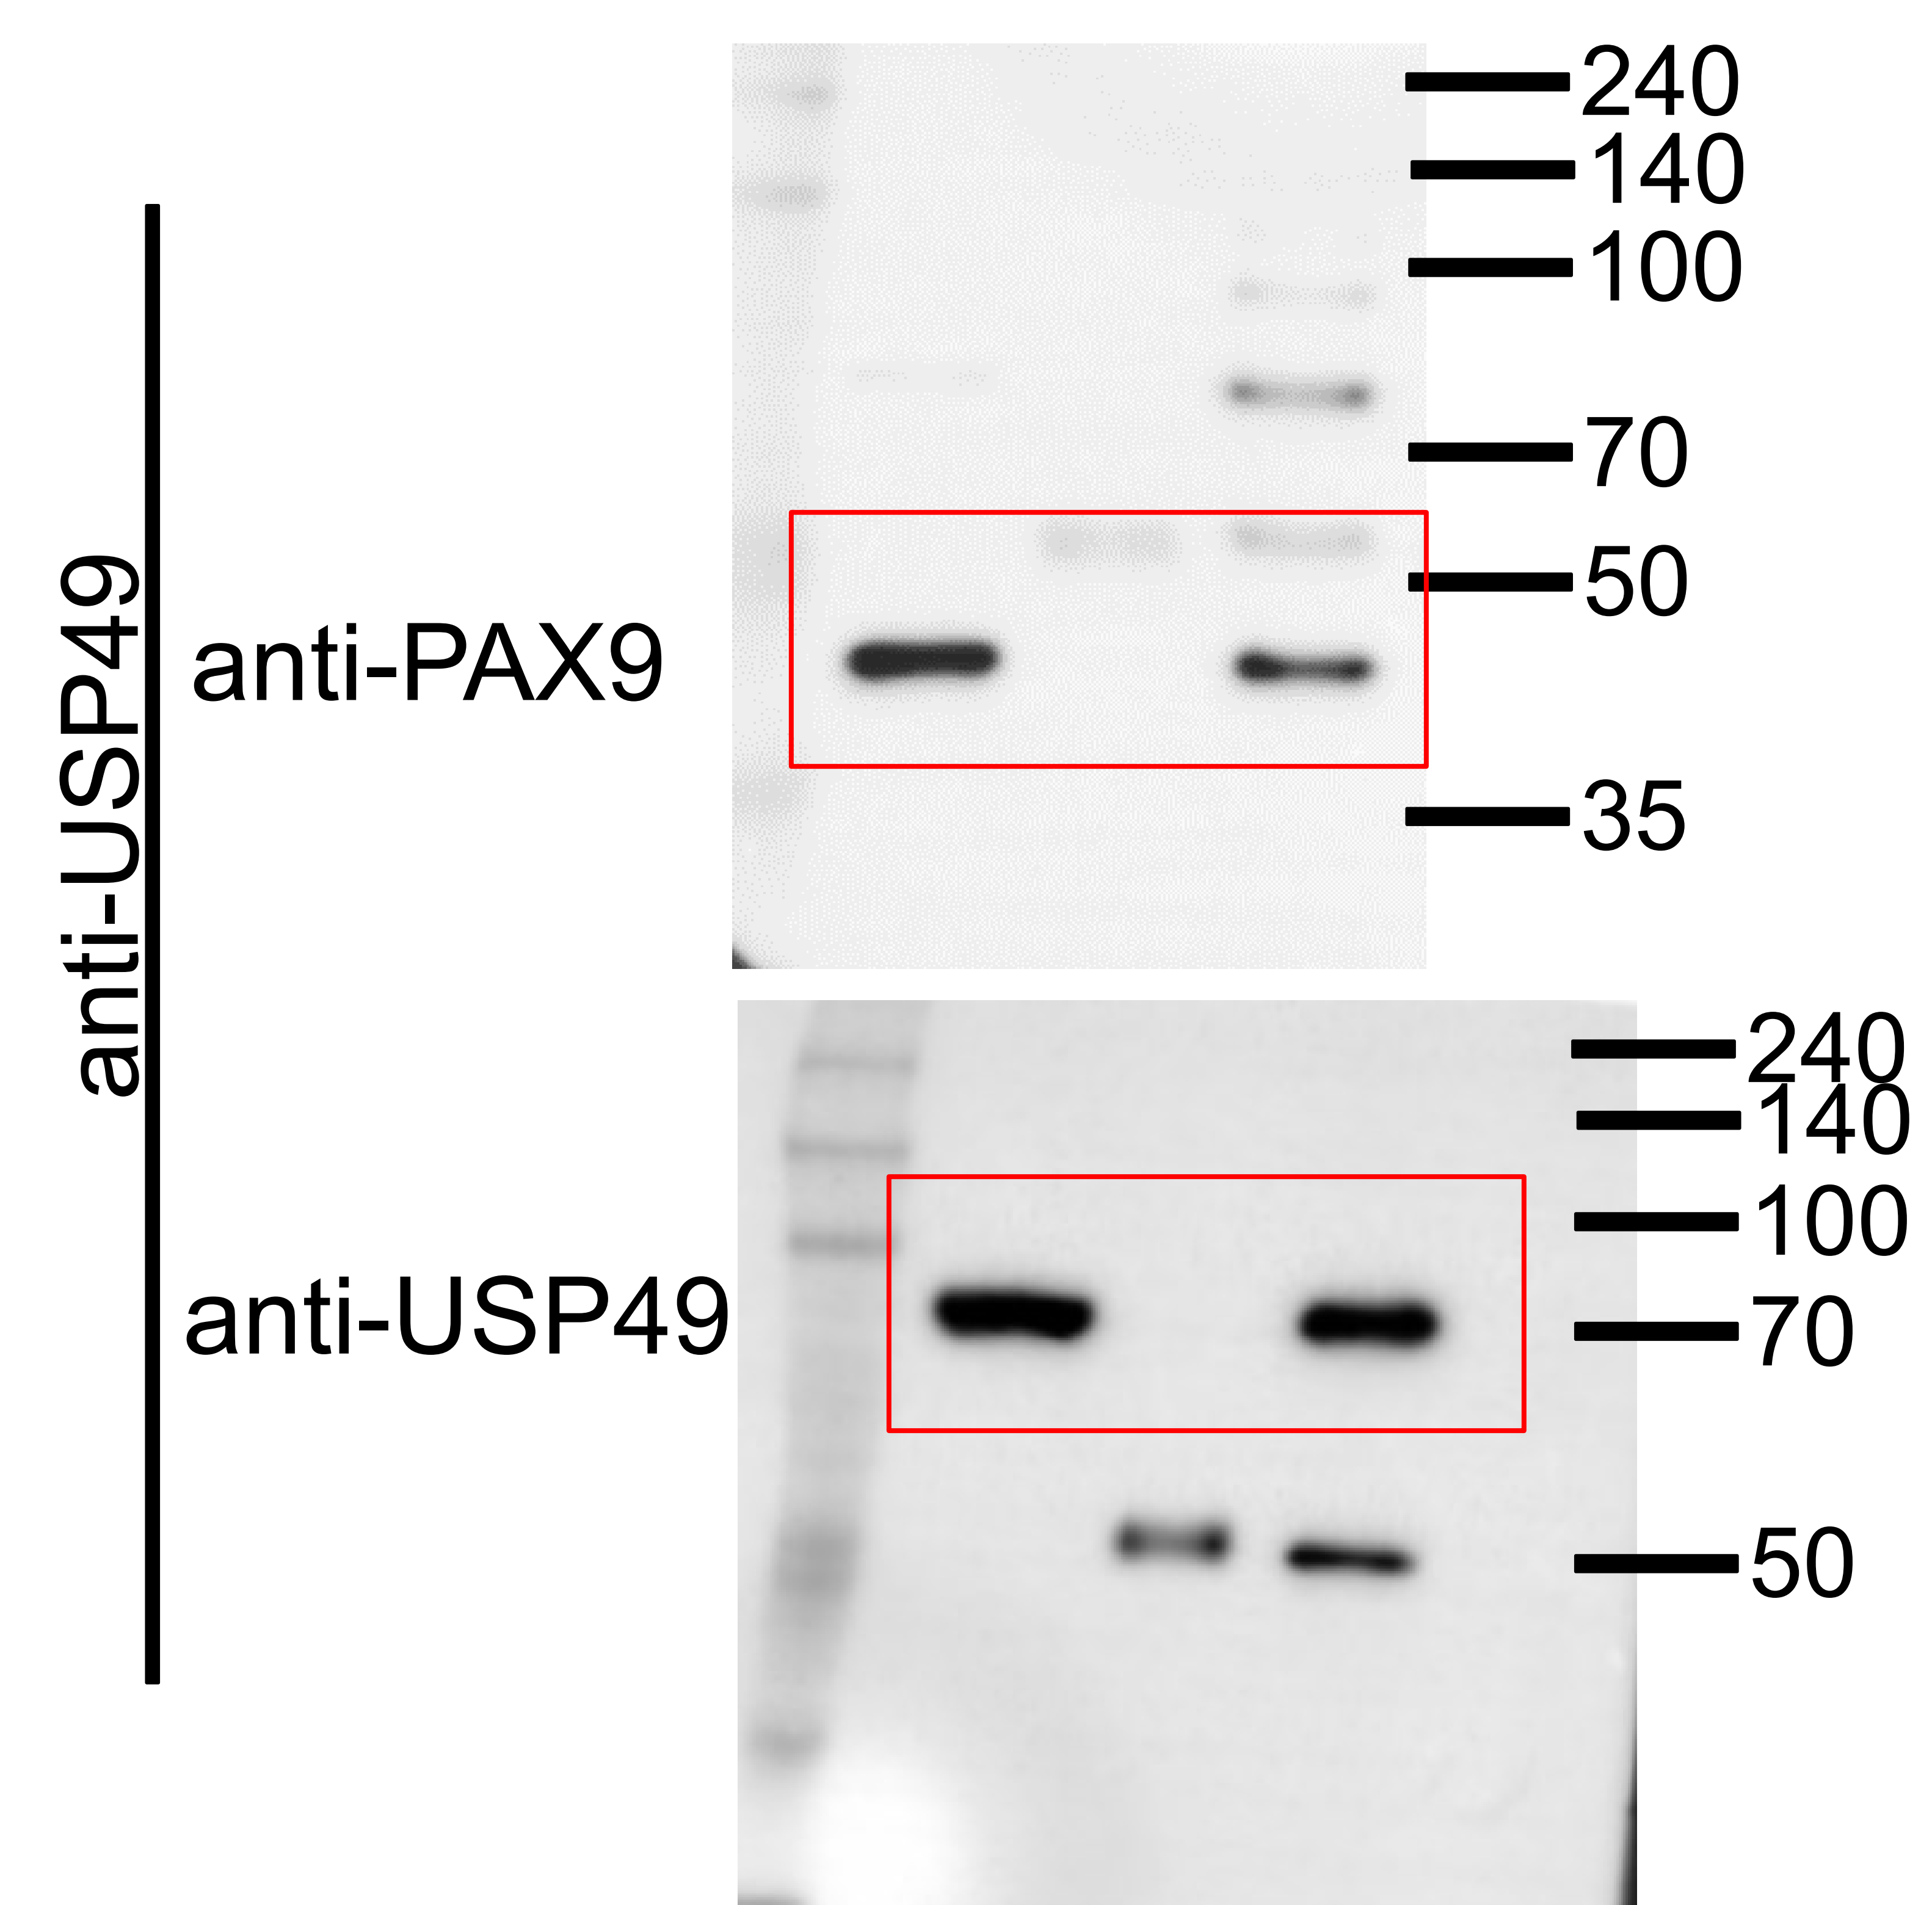

## B

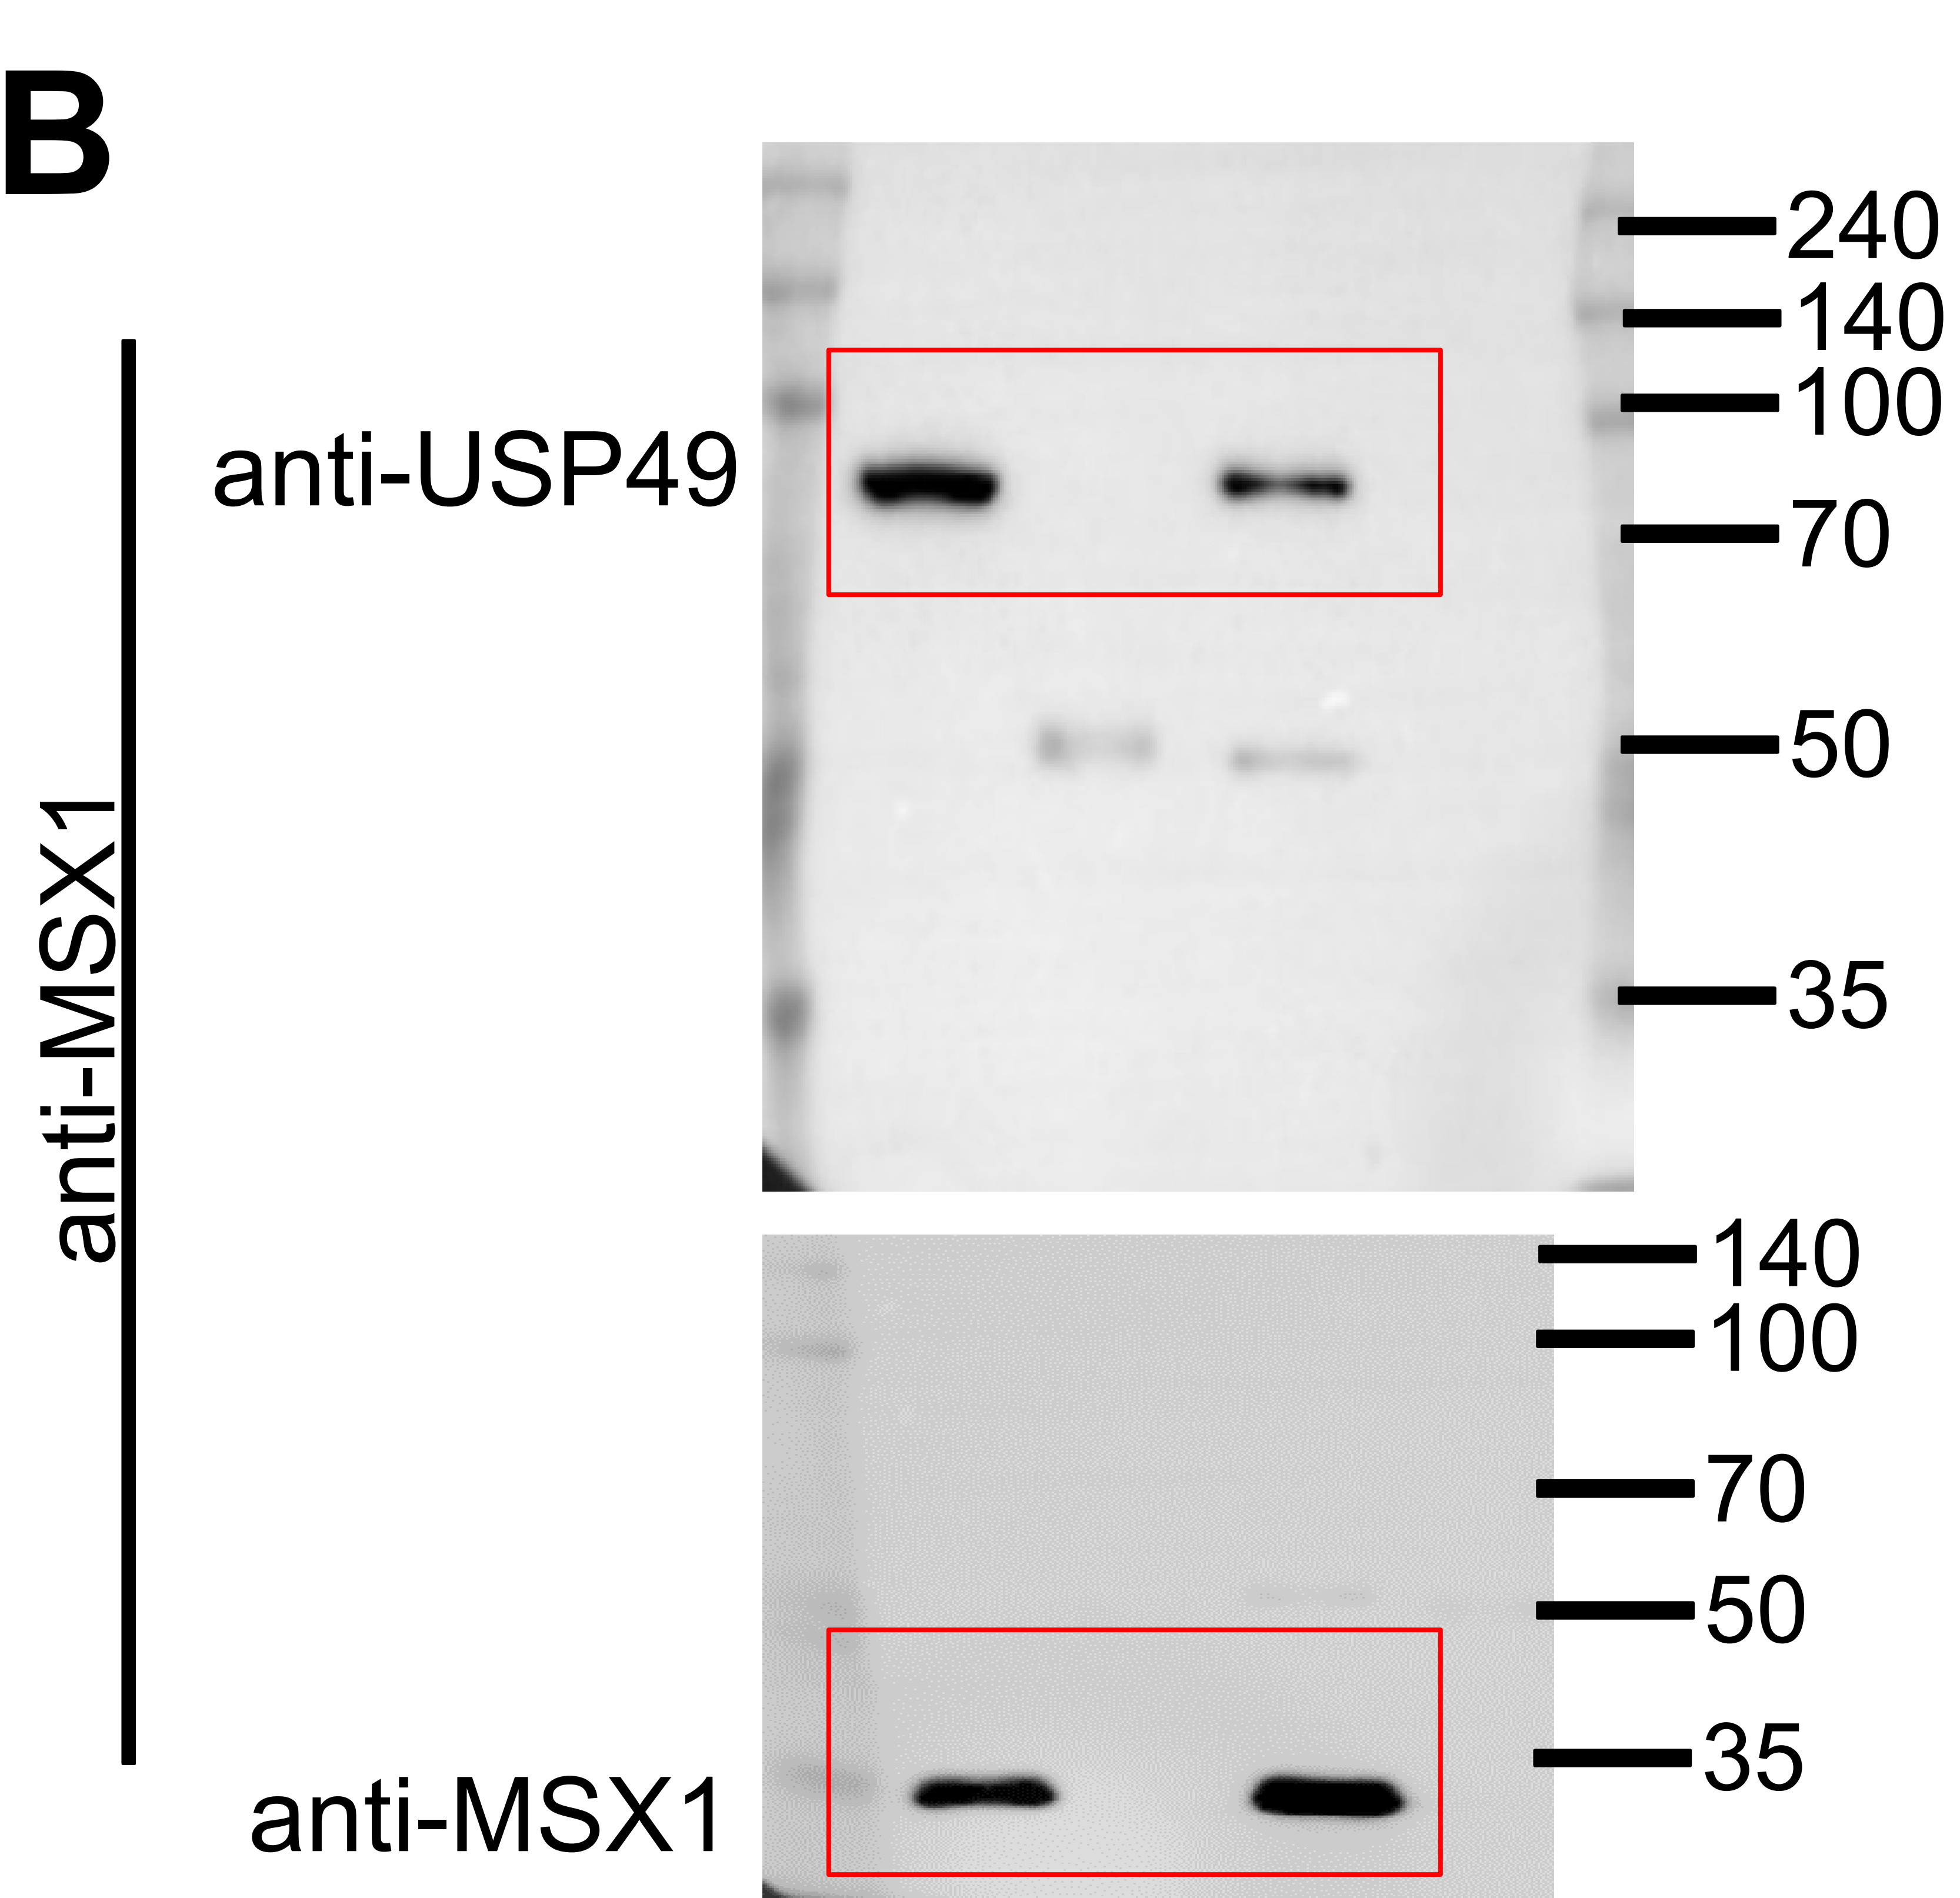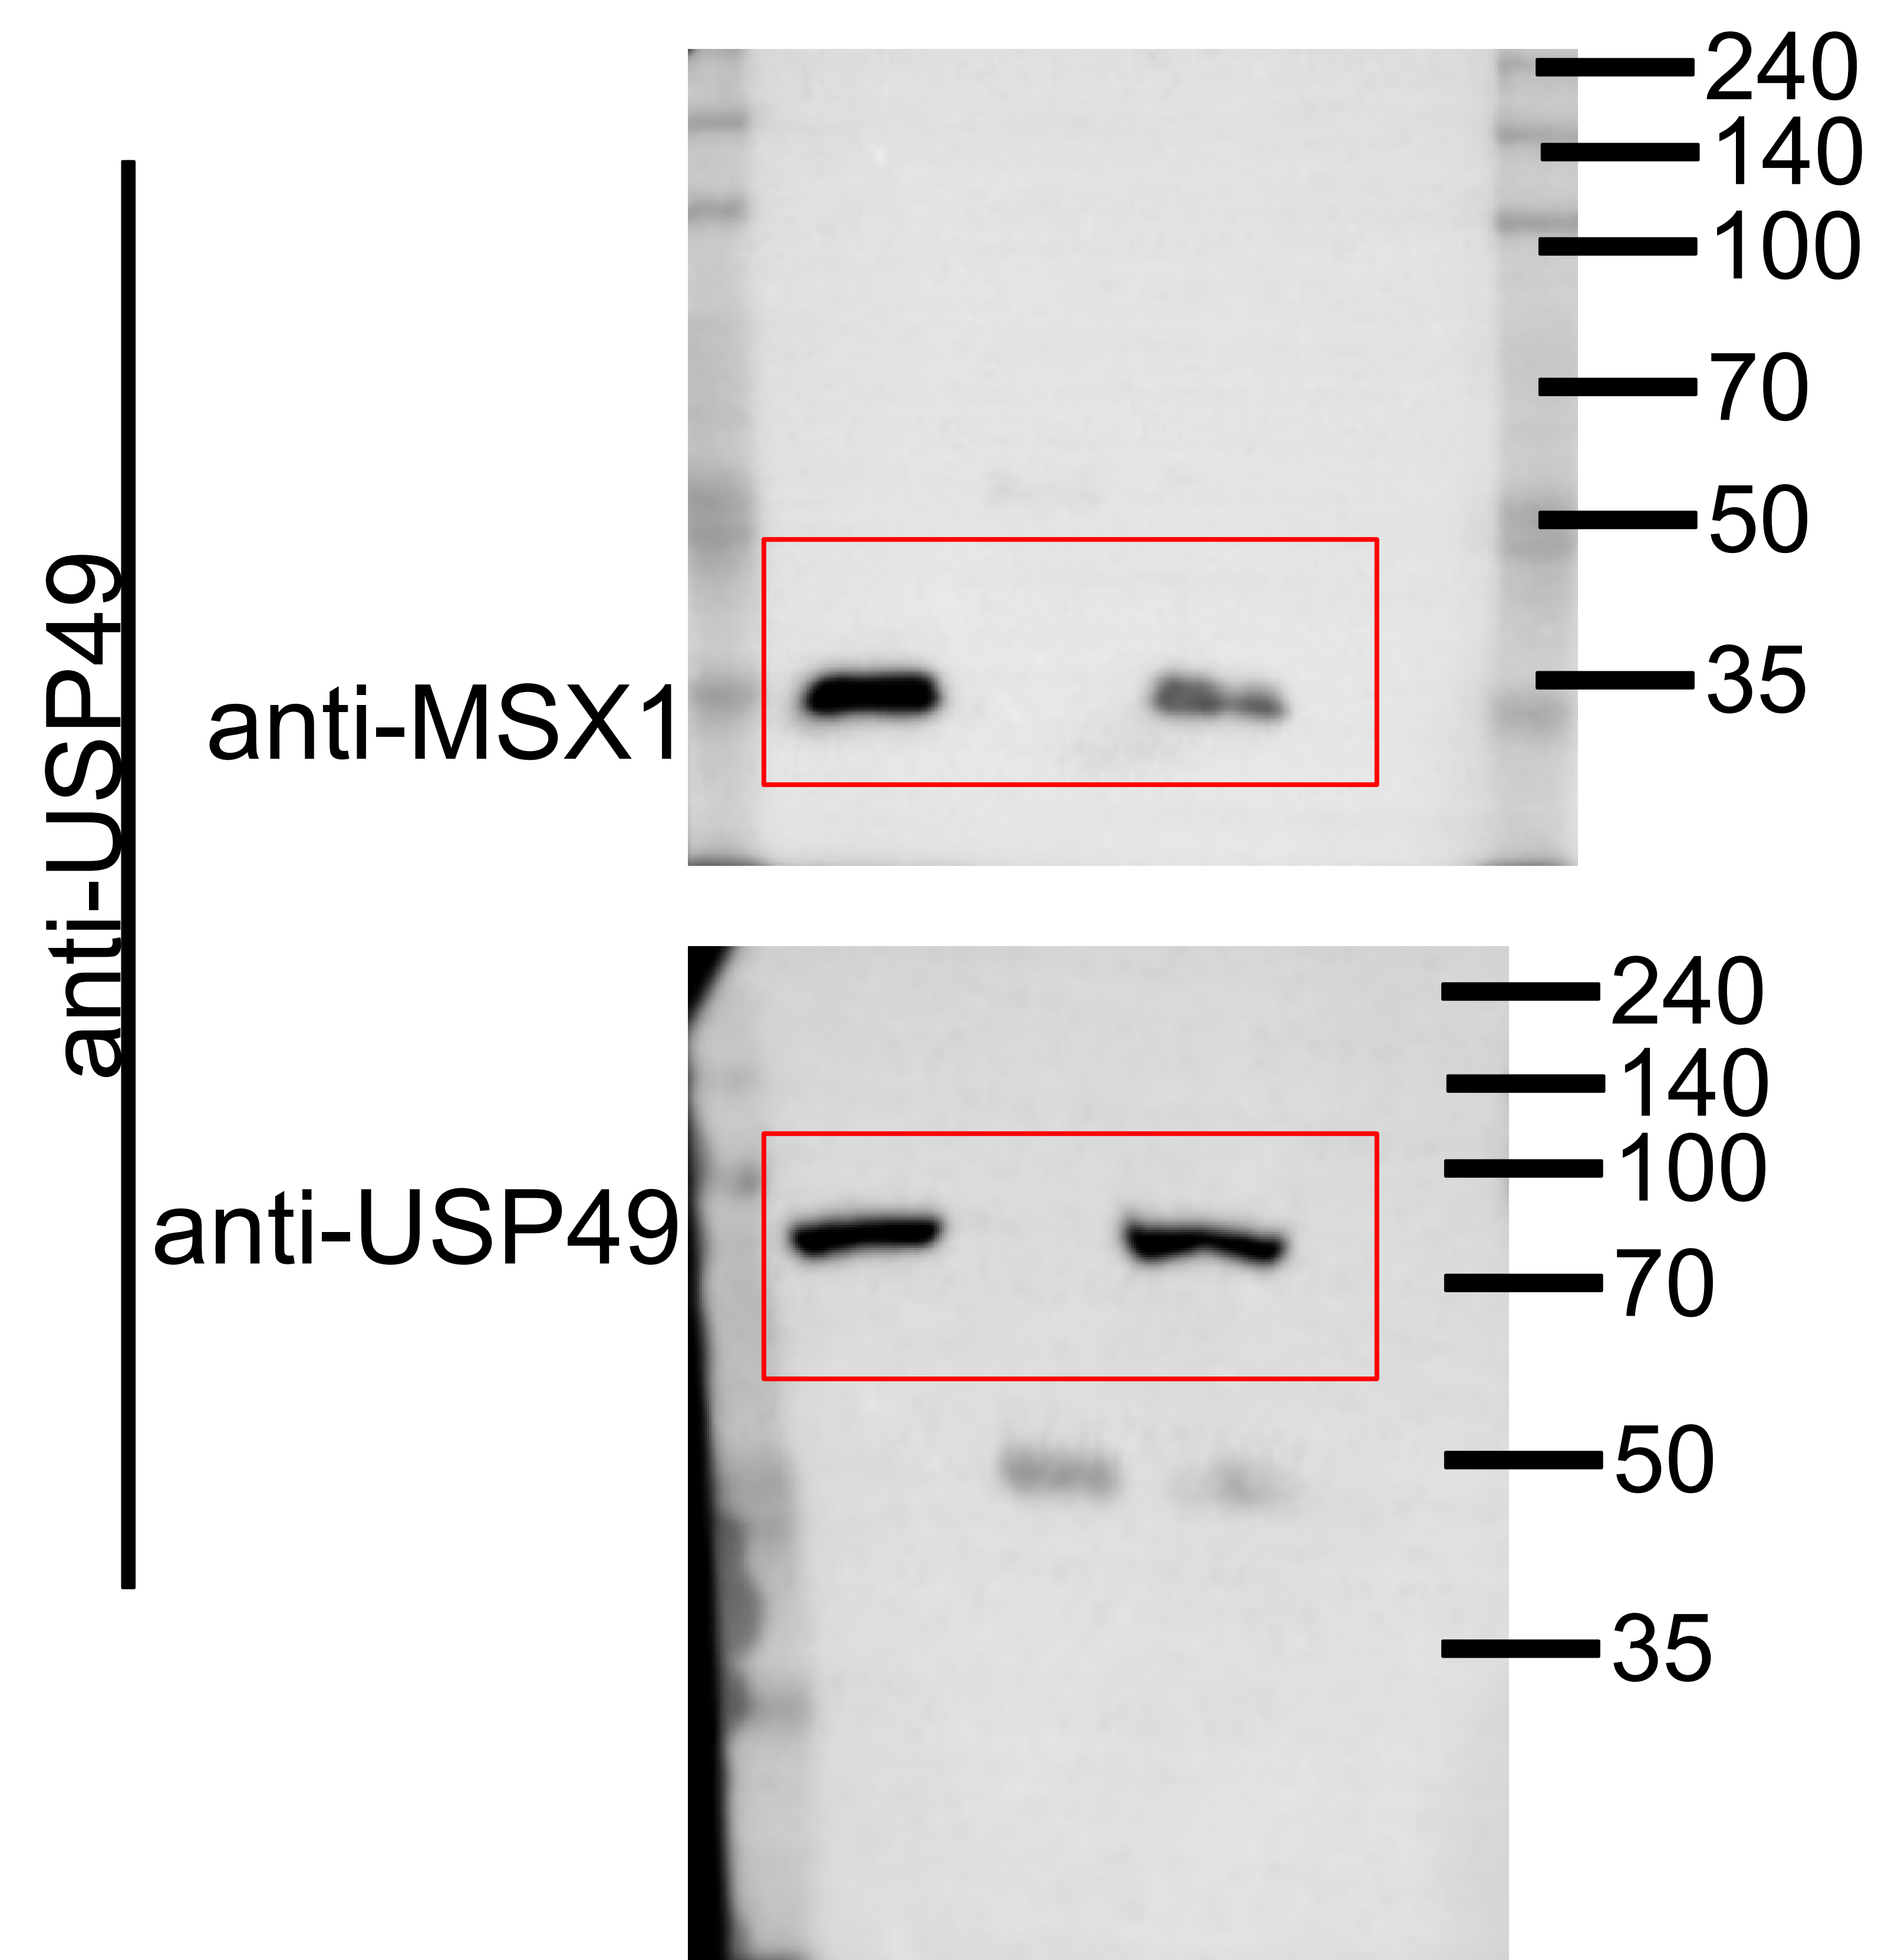

# Uncropped blots of Fig. 3

## C

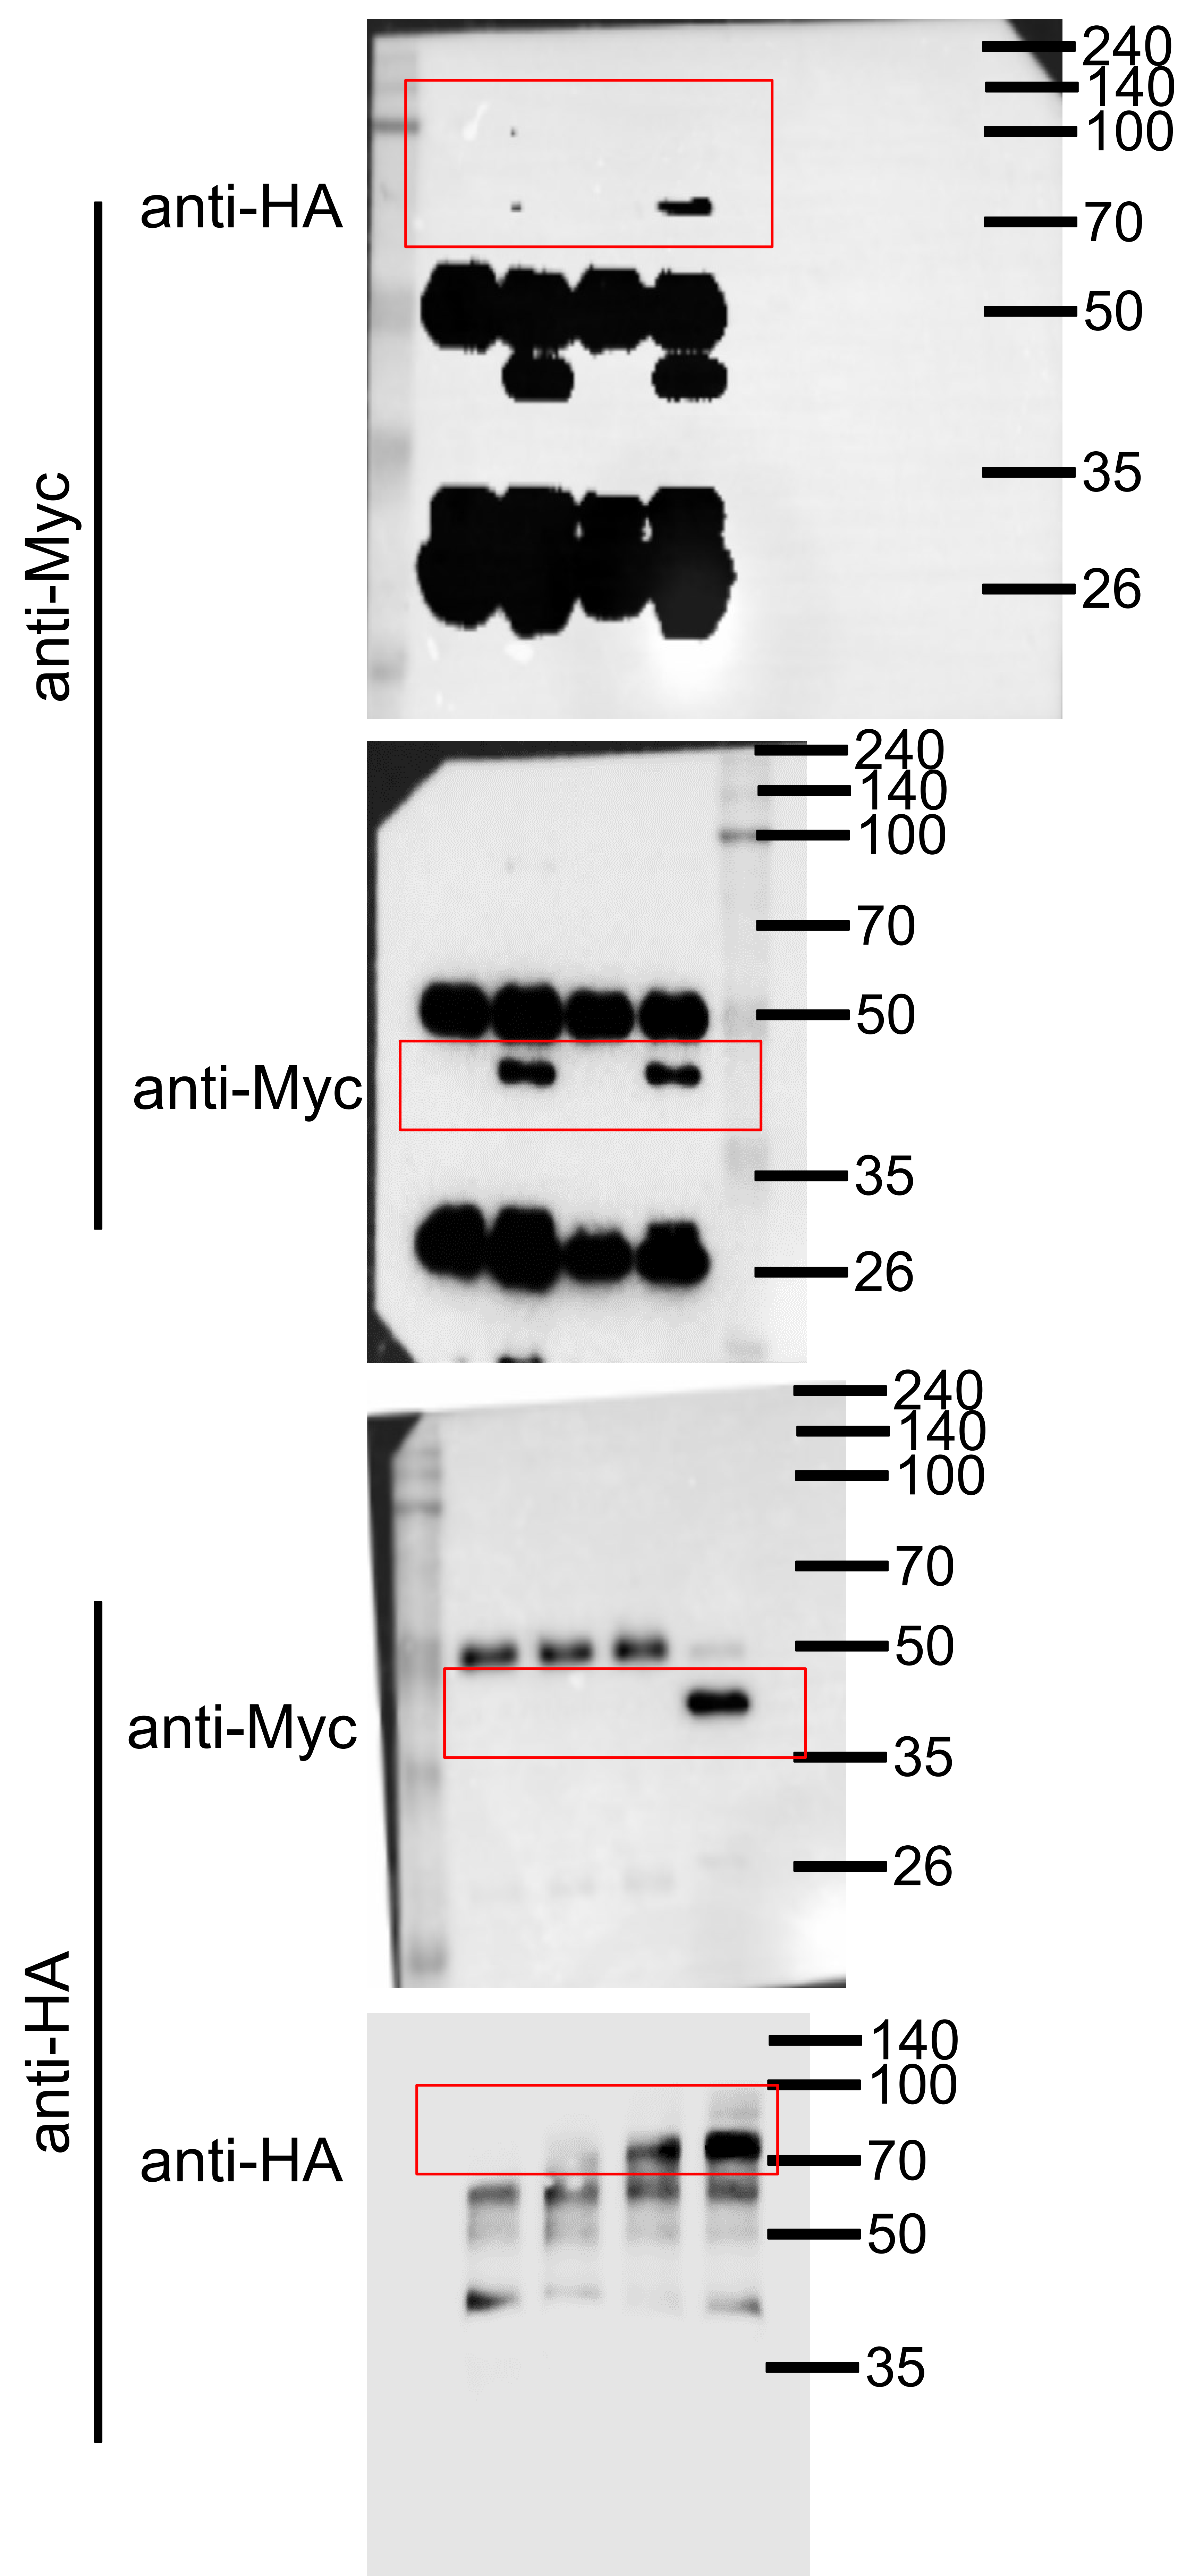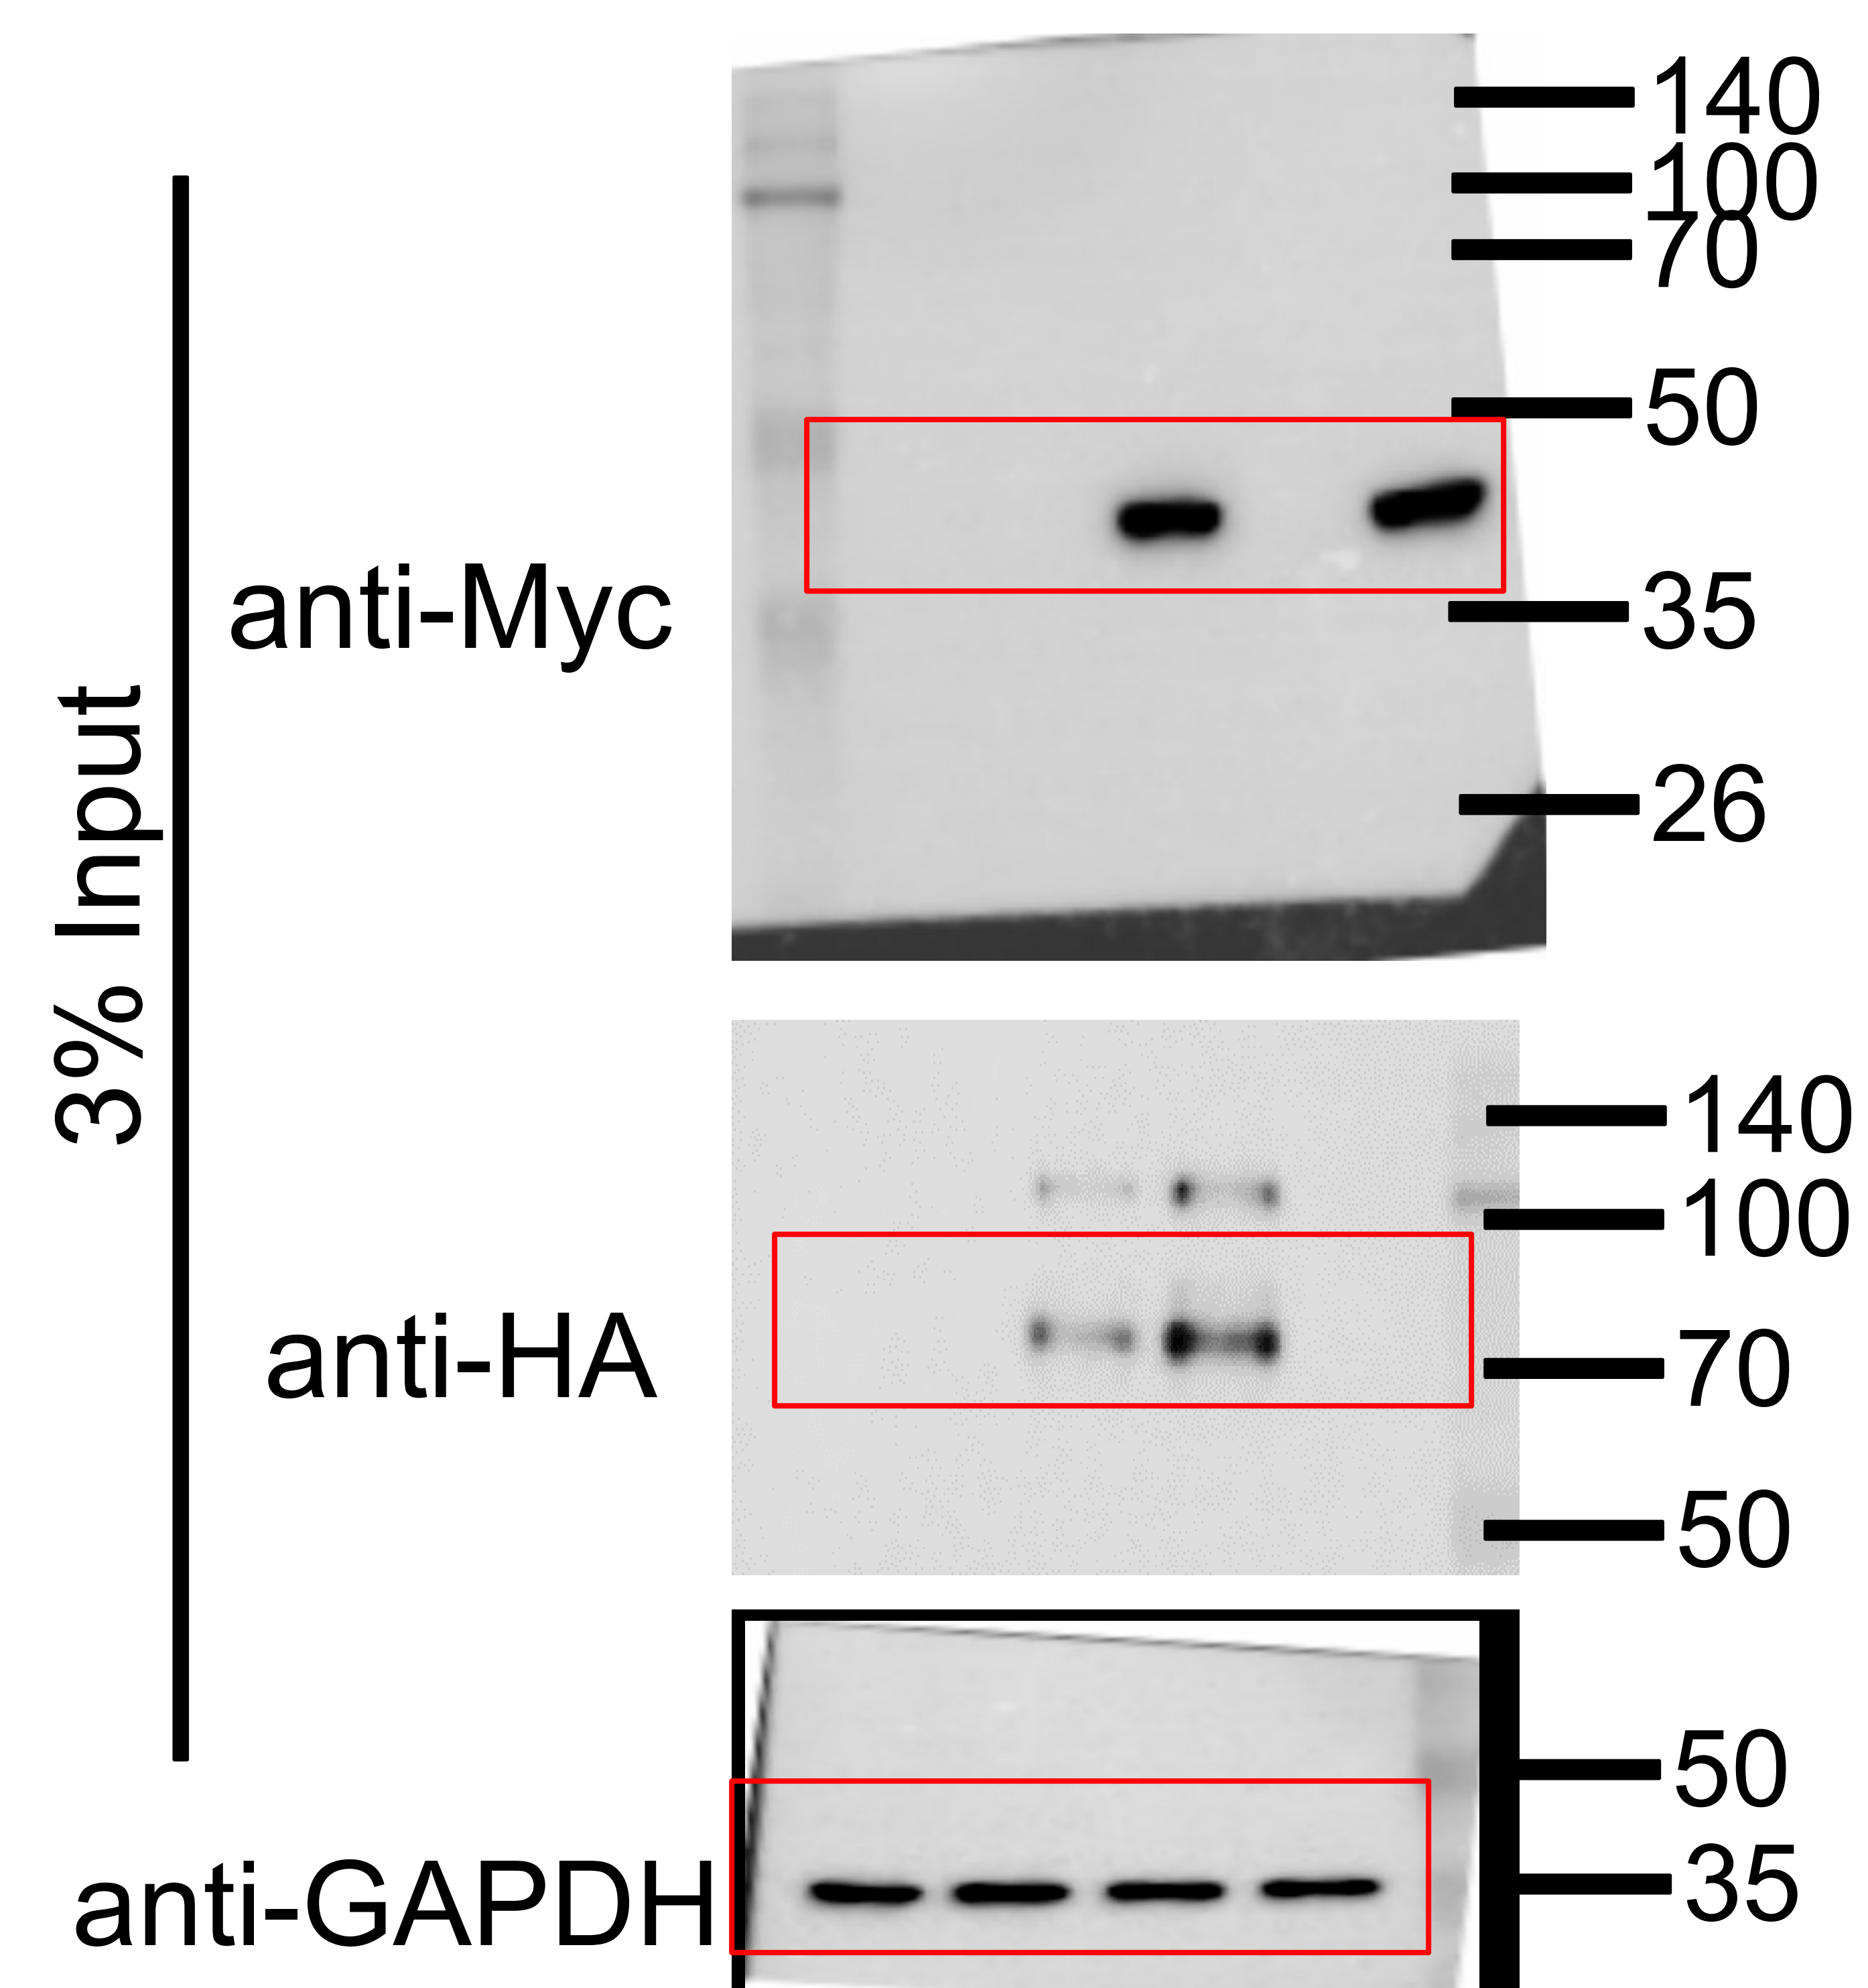

# Uncropped blots of Fig. 3

## D

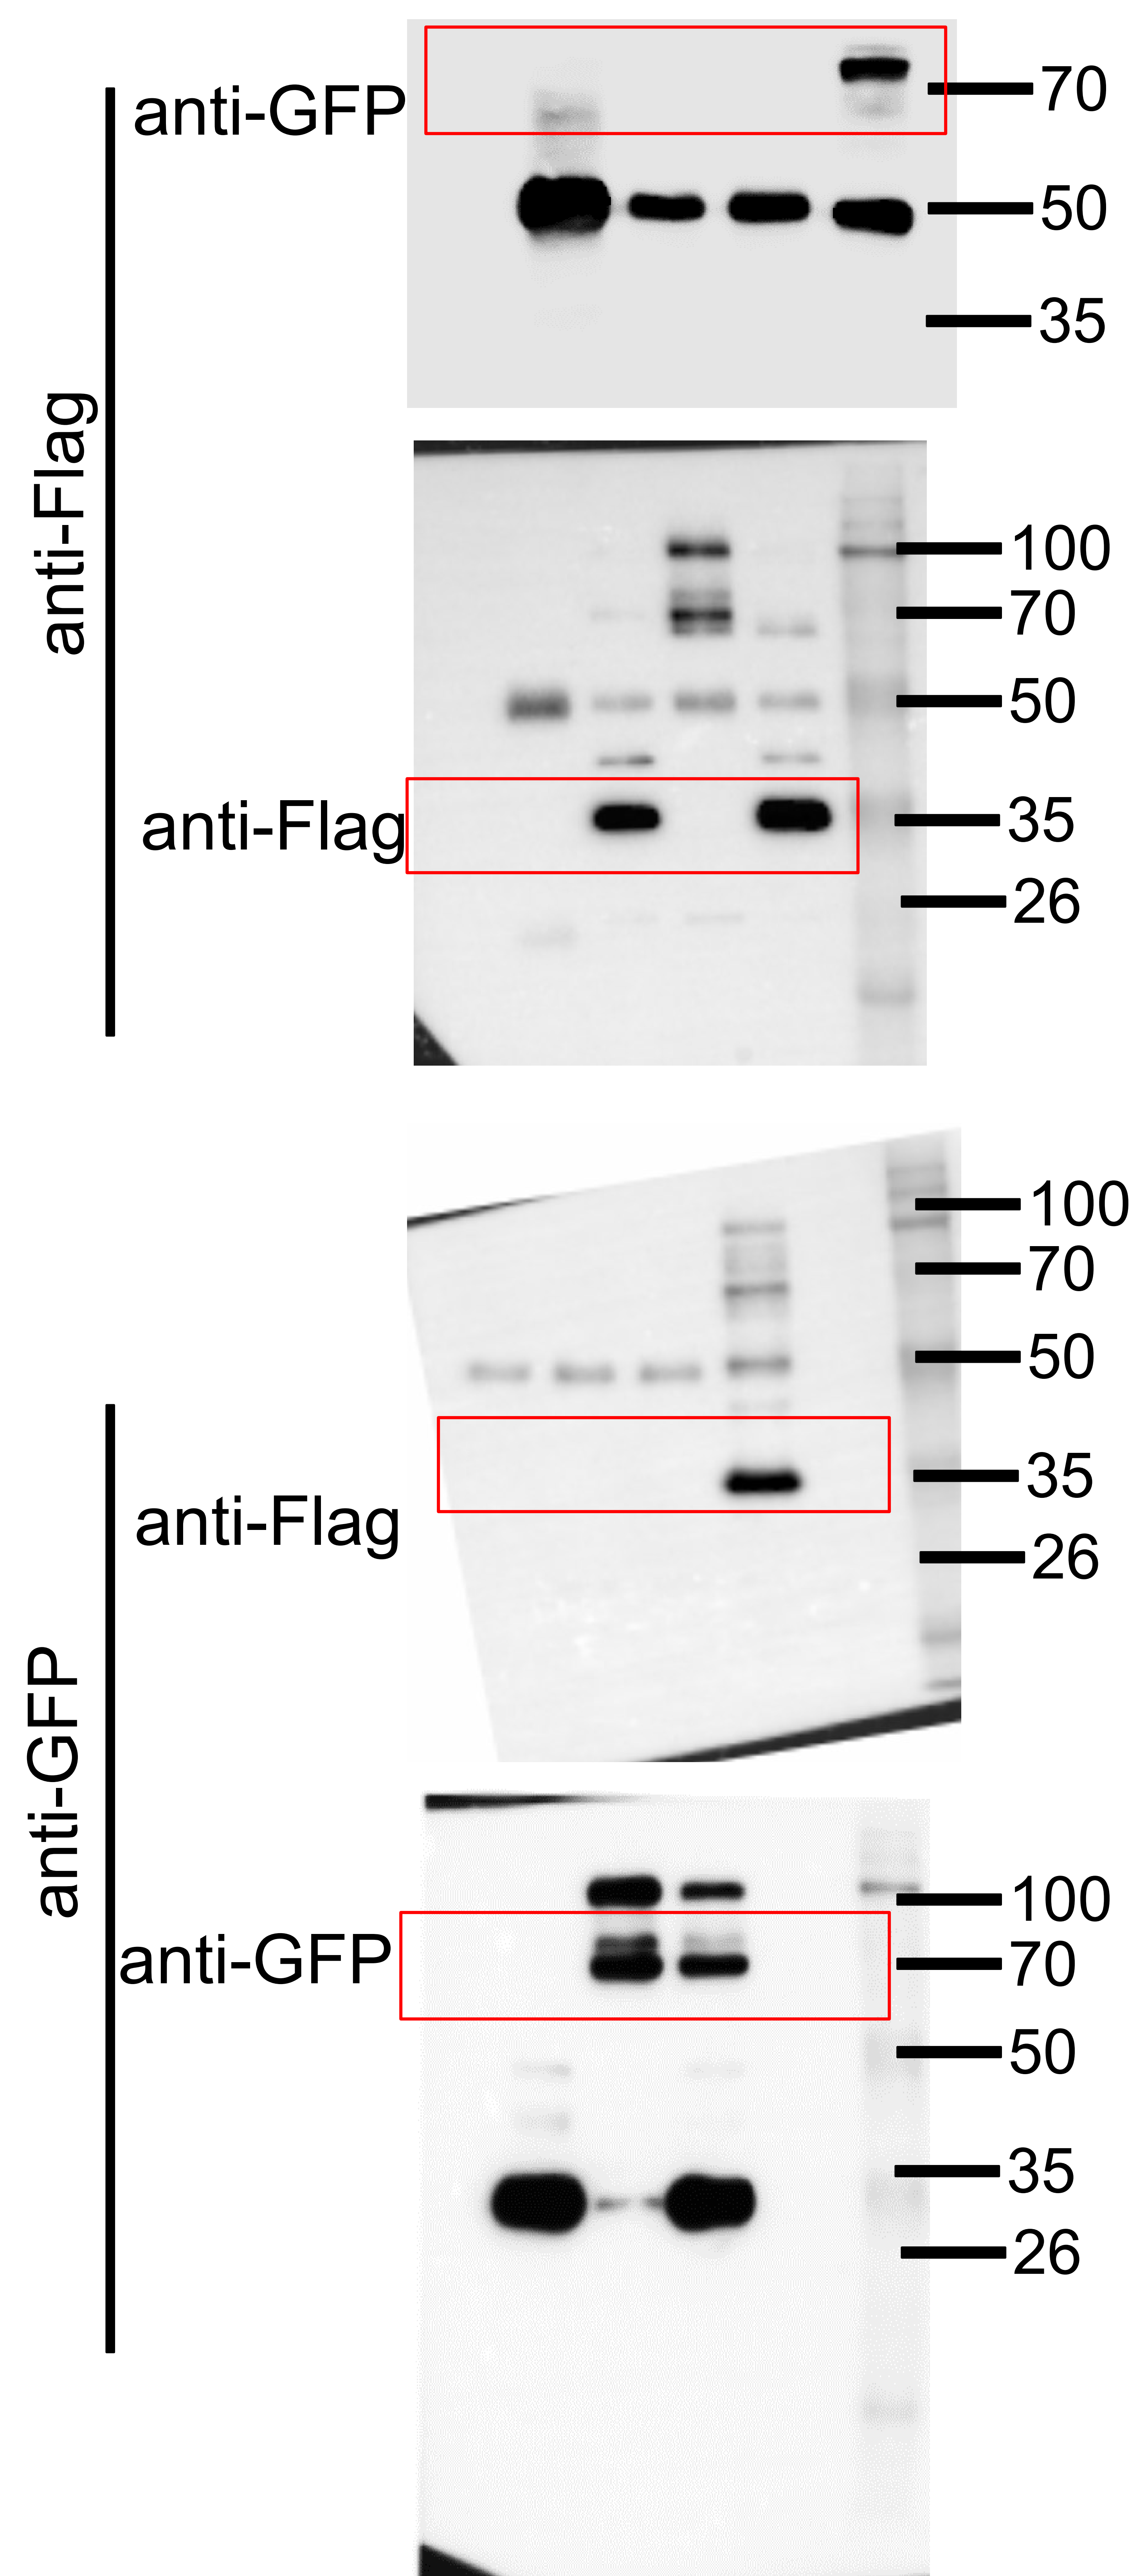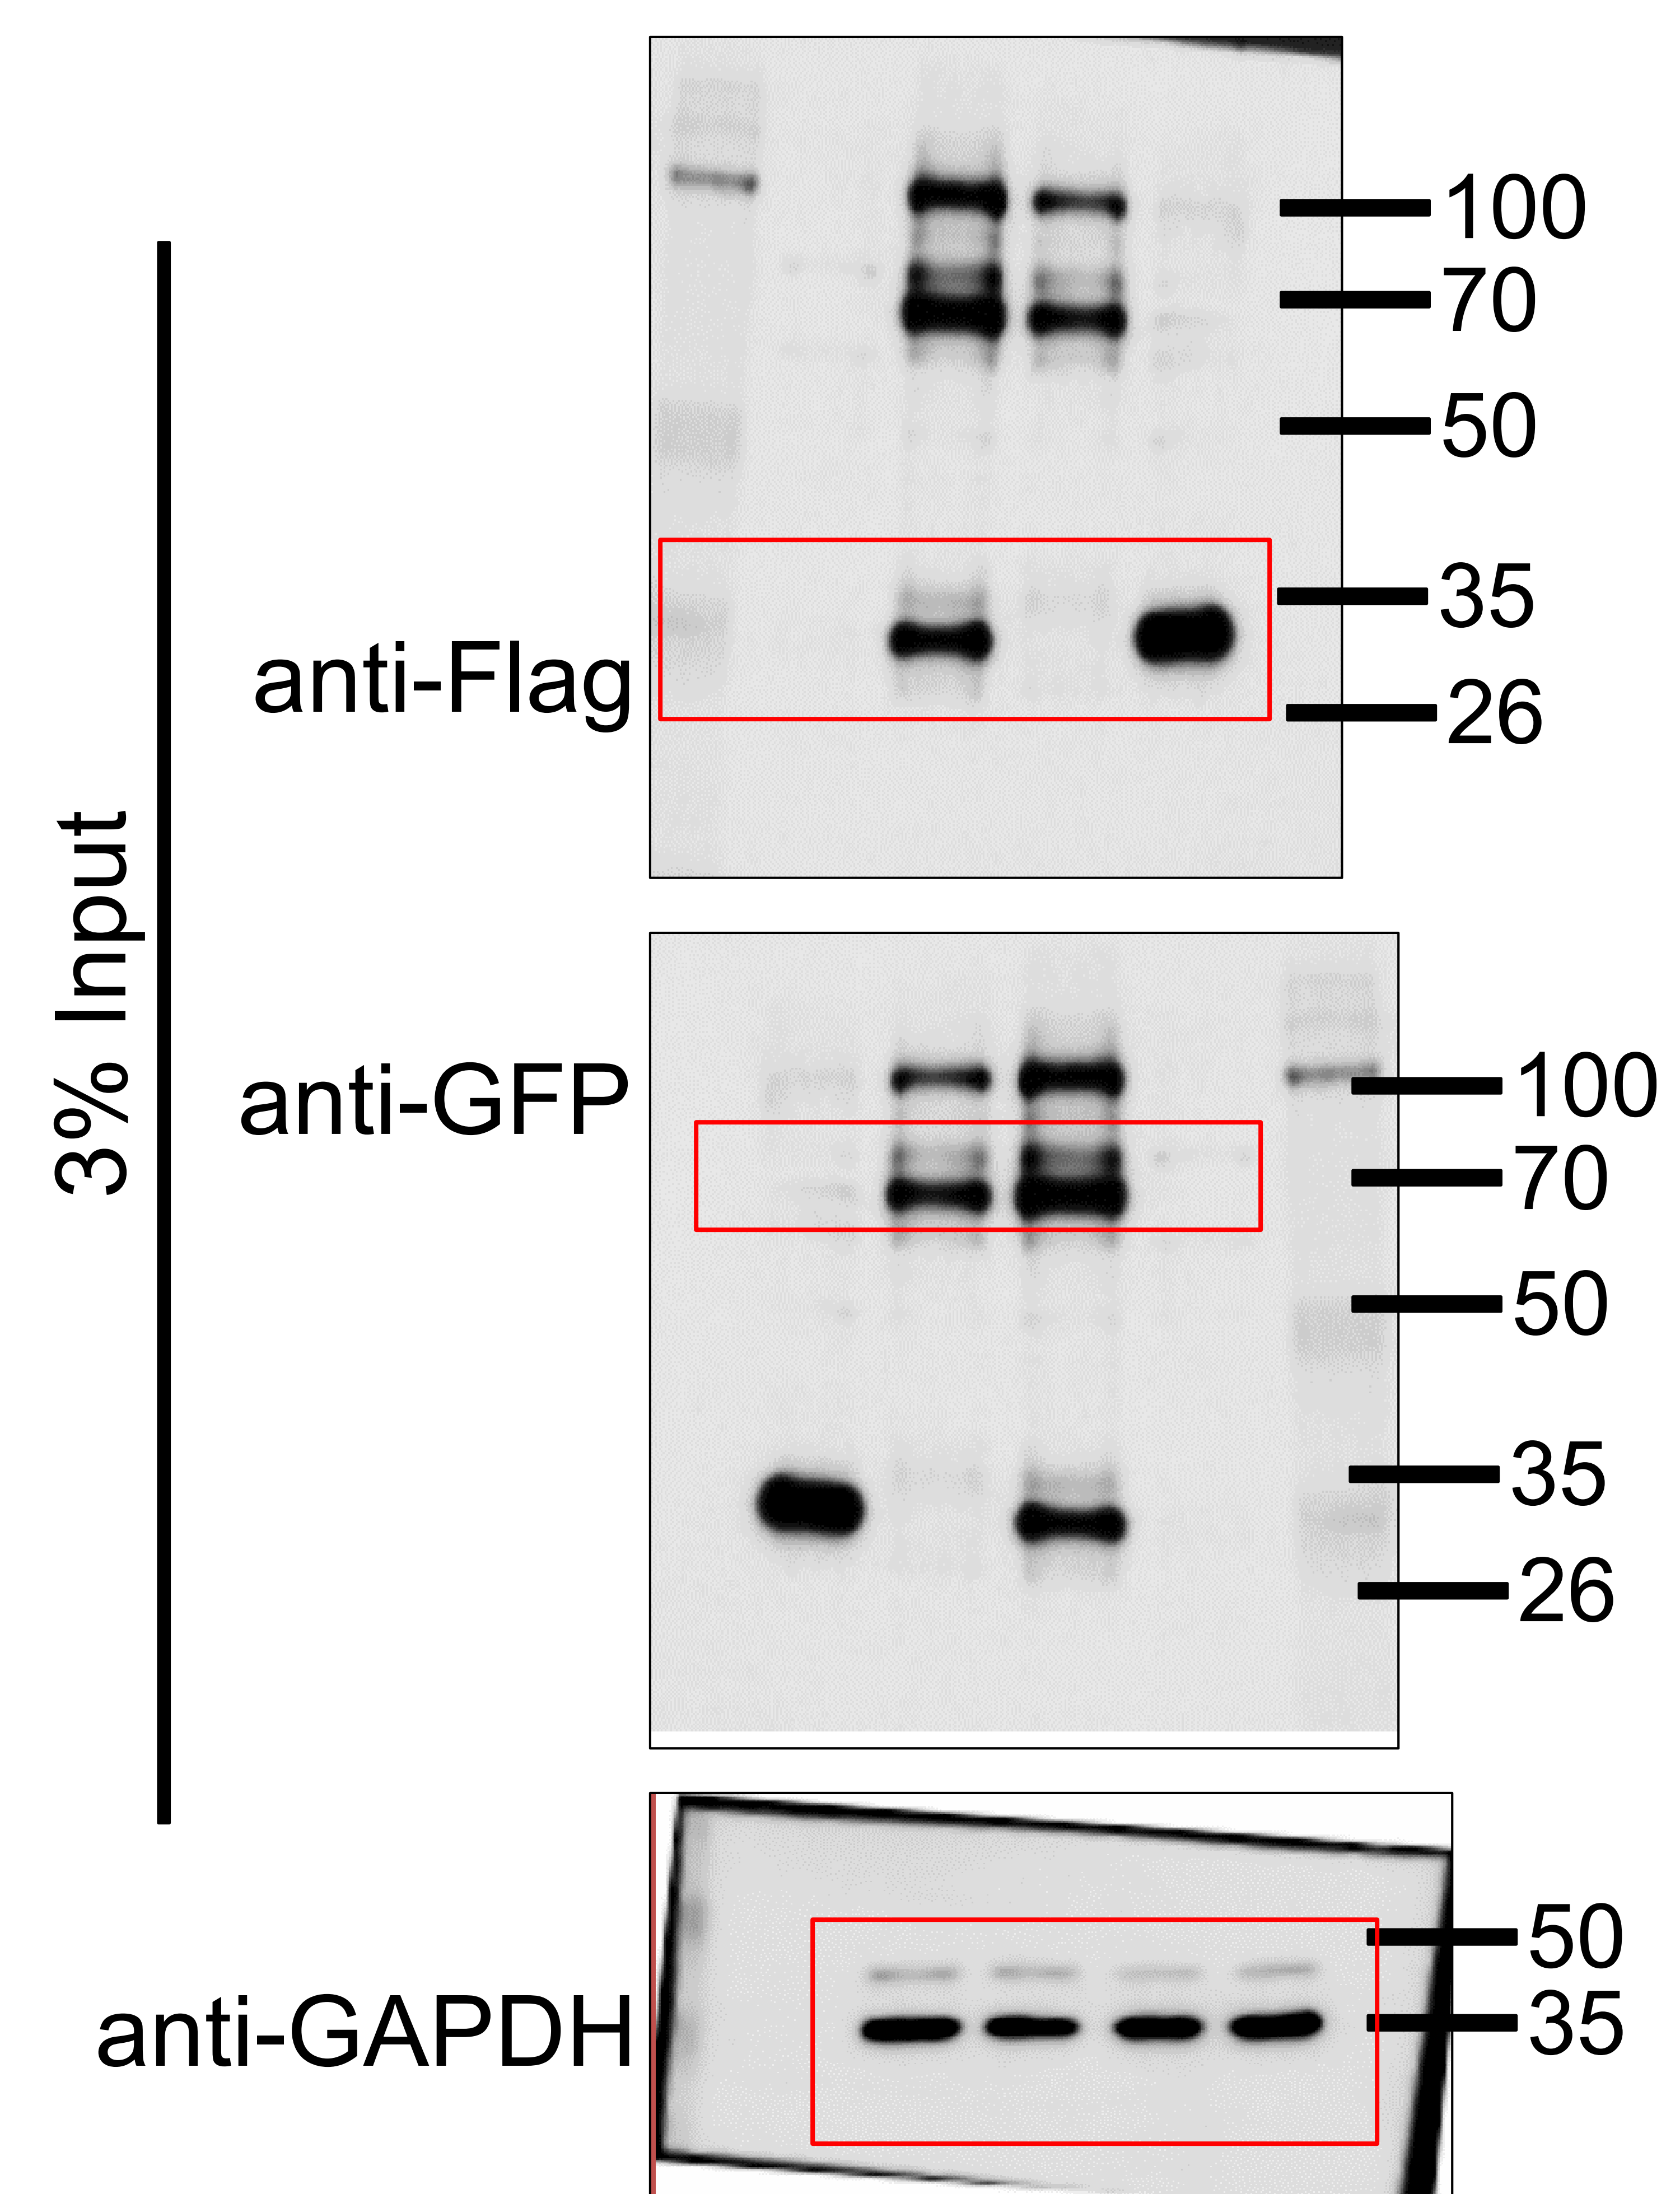



# Uncropped blots of Fig. 3

## G

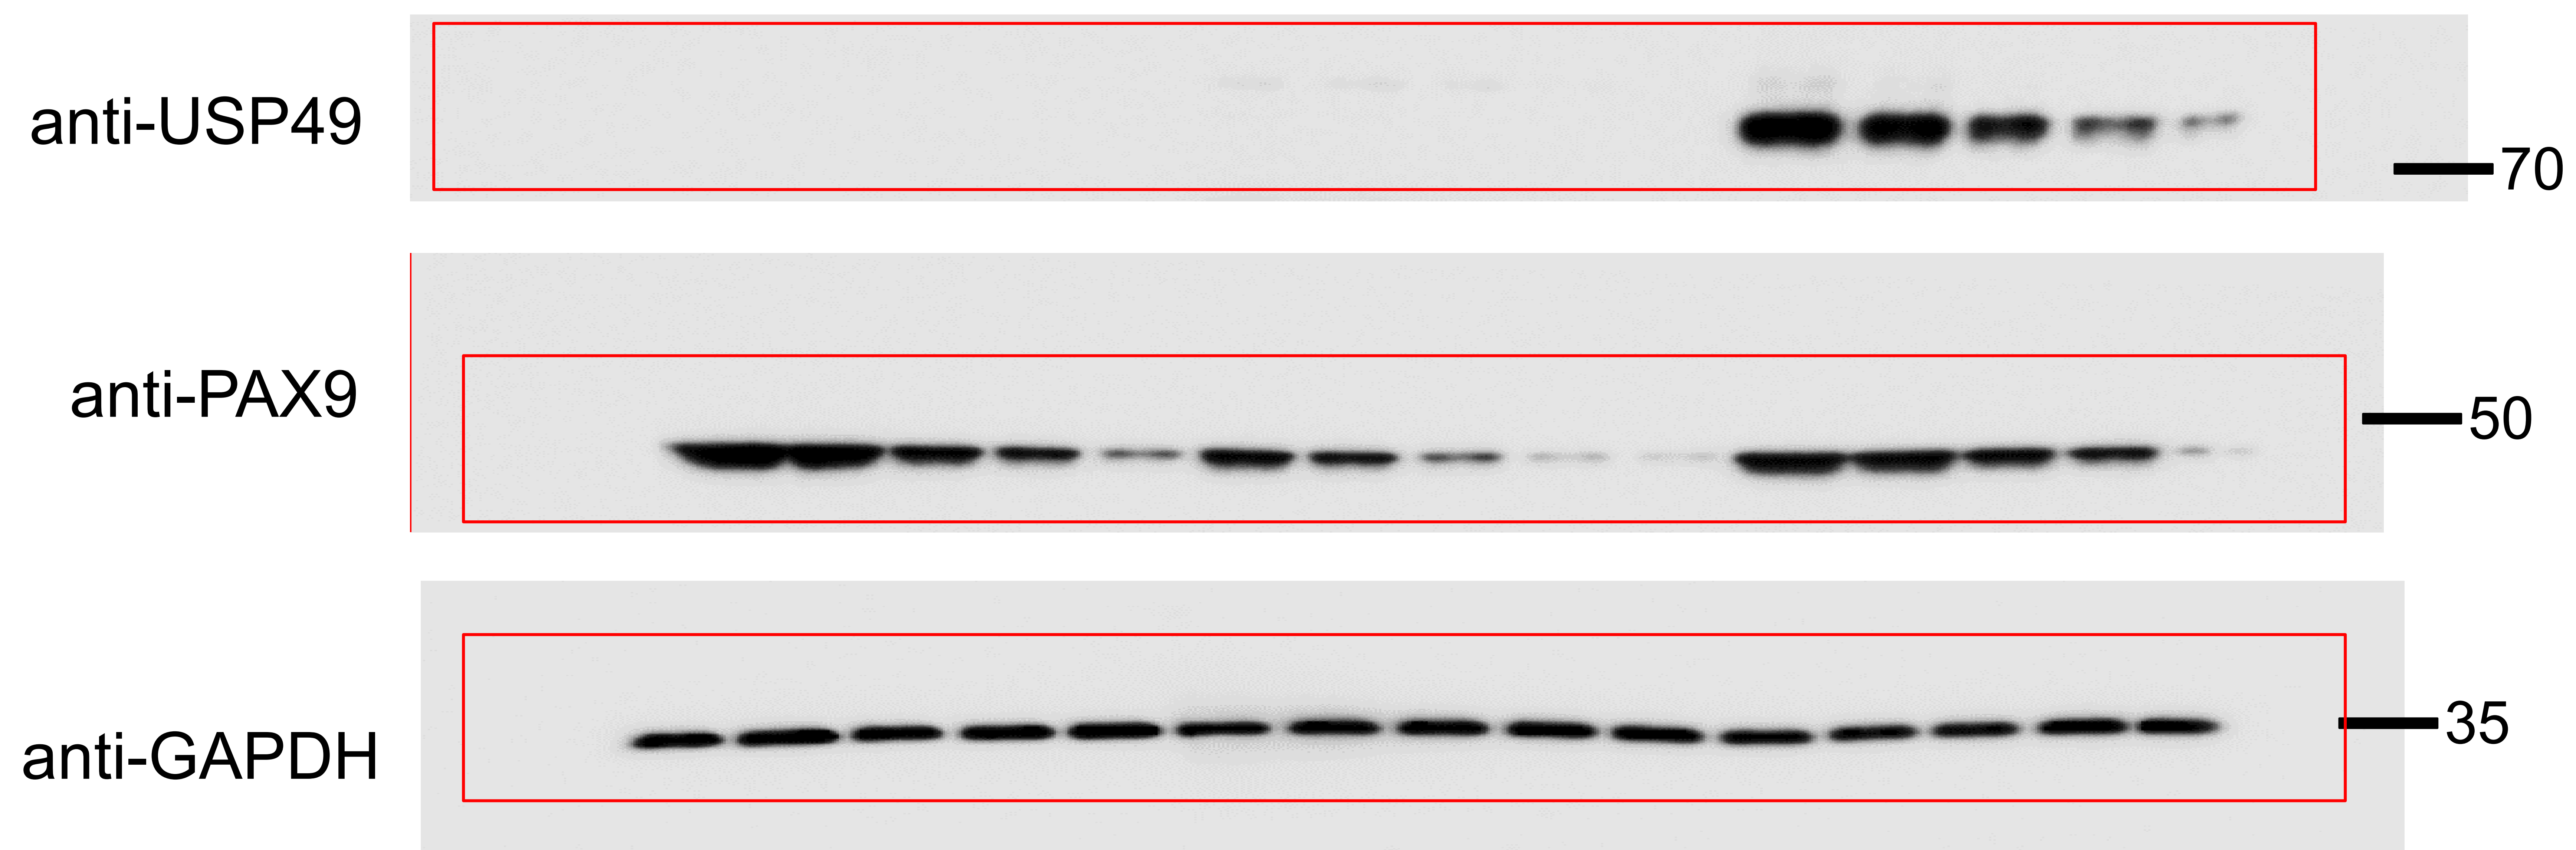

## H

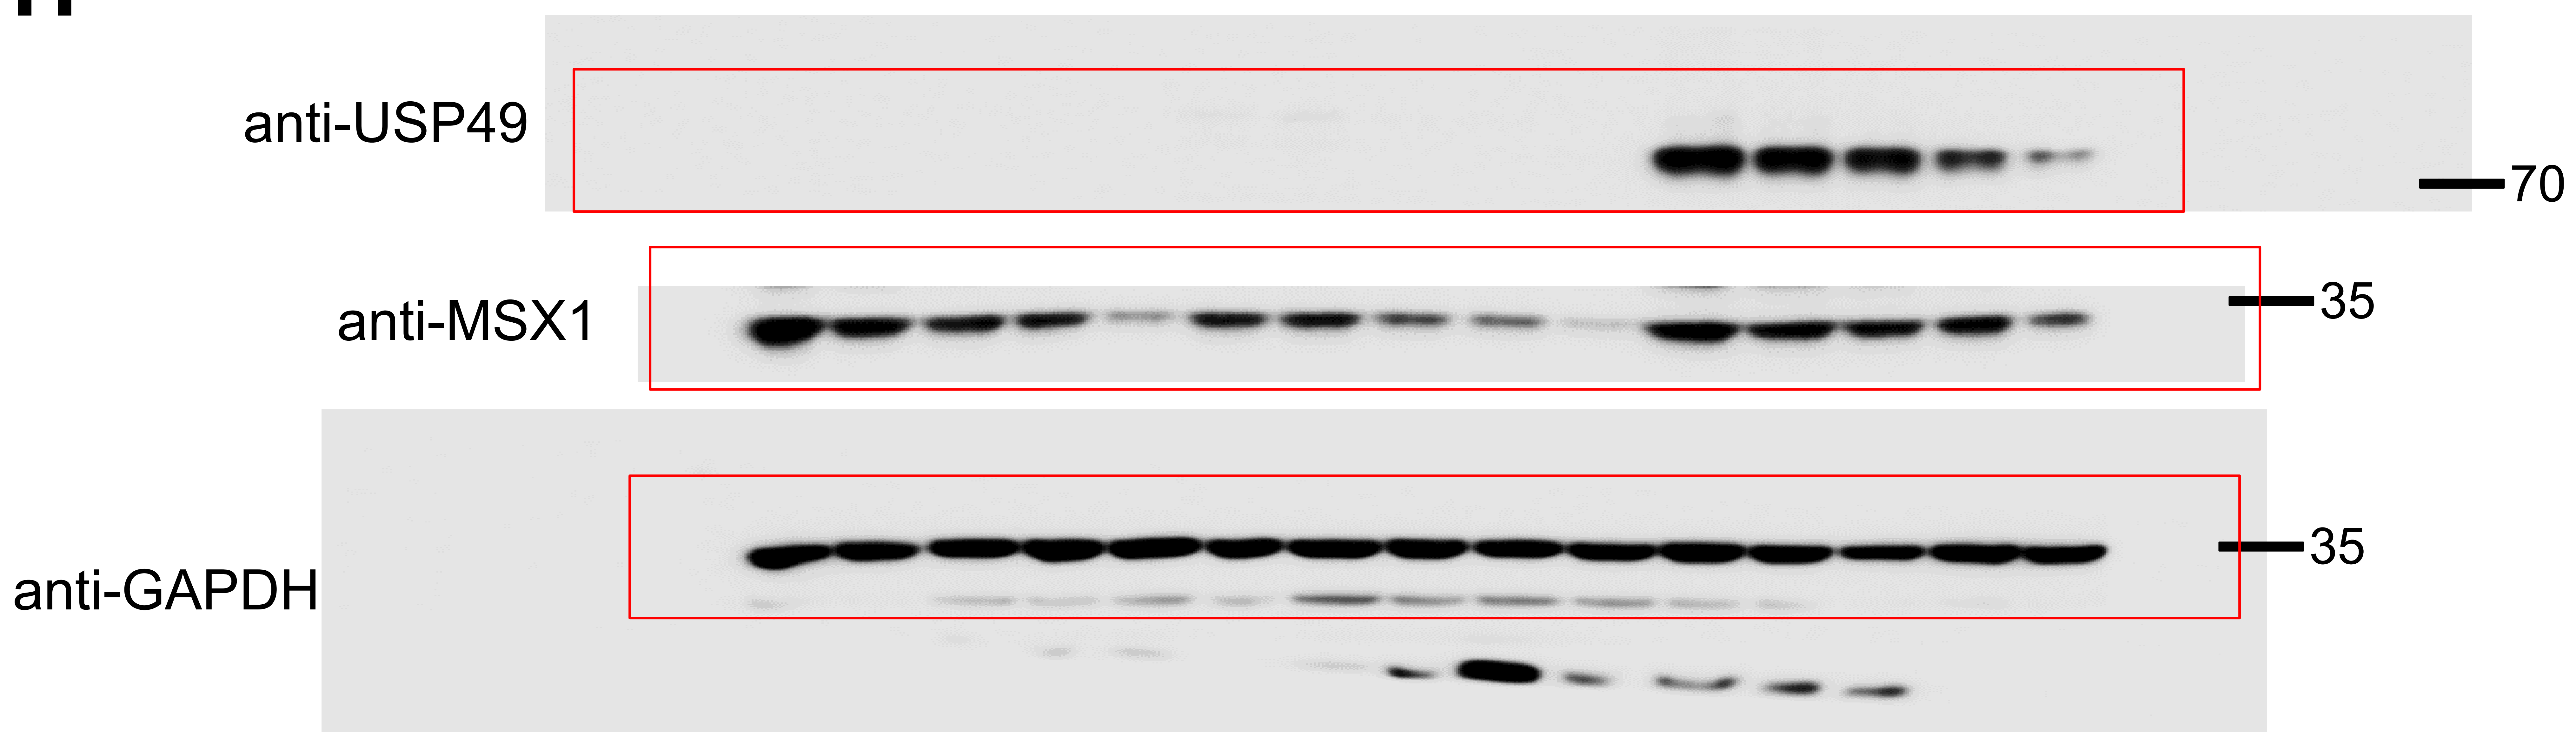

# Uncropped blots of Fig. 3

## I

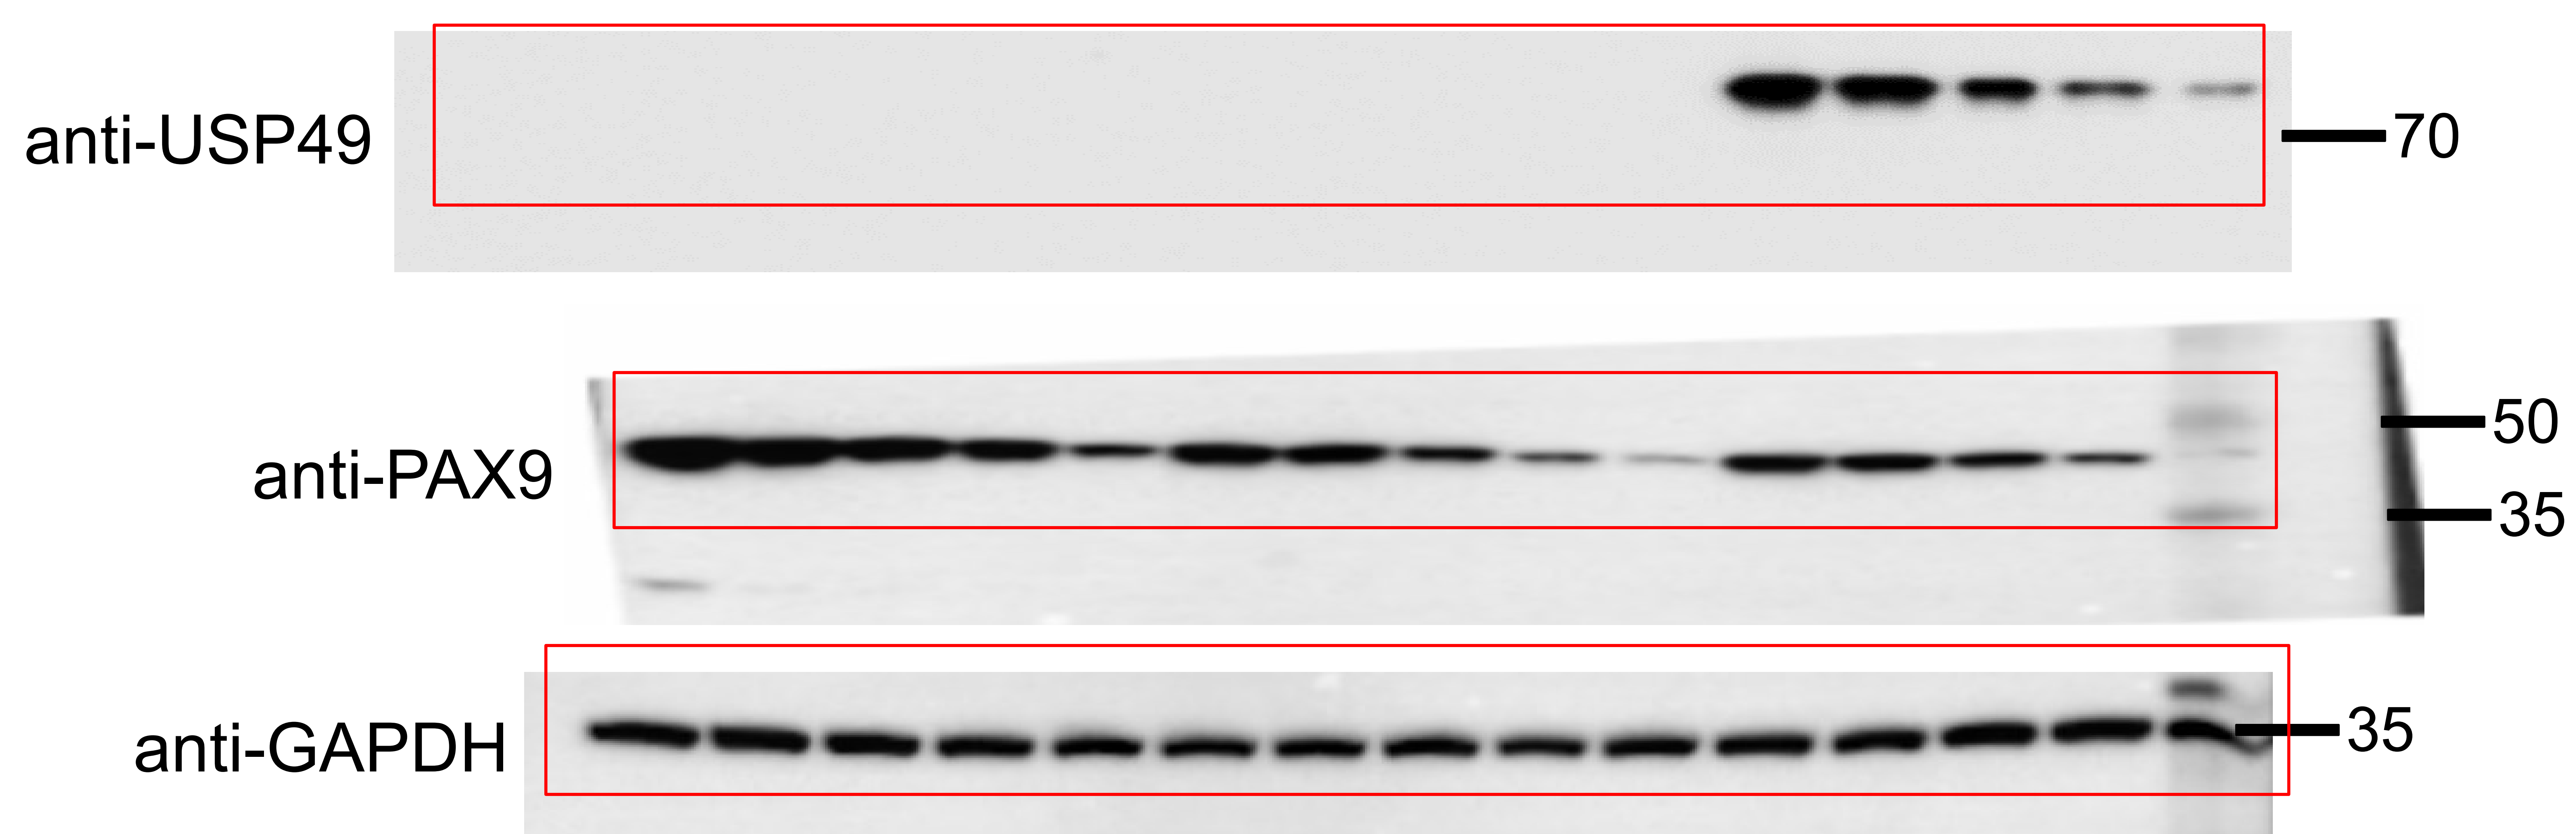

## J

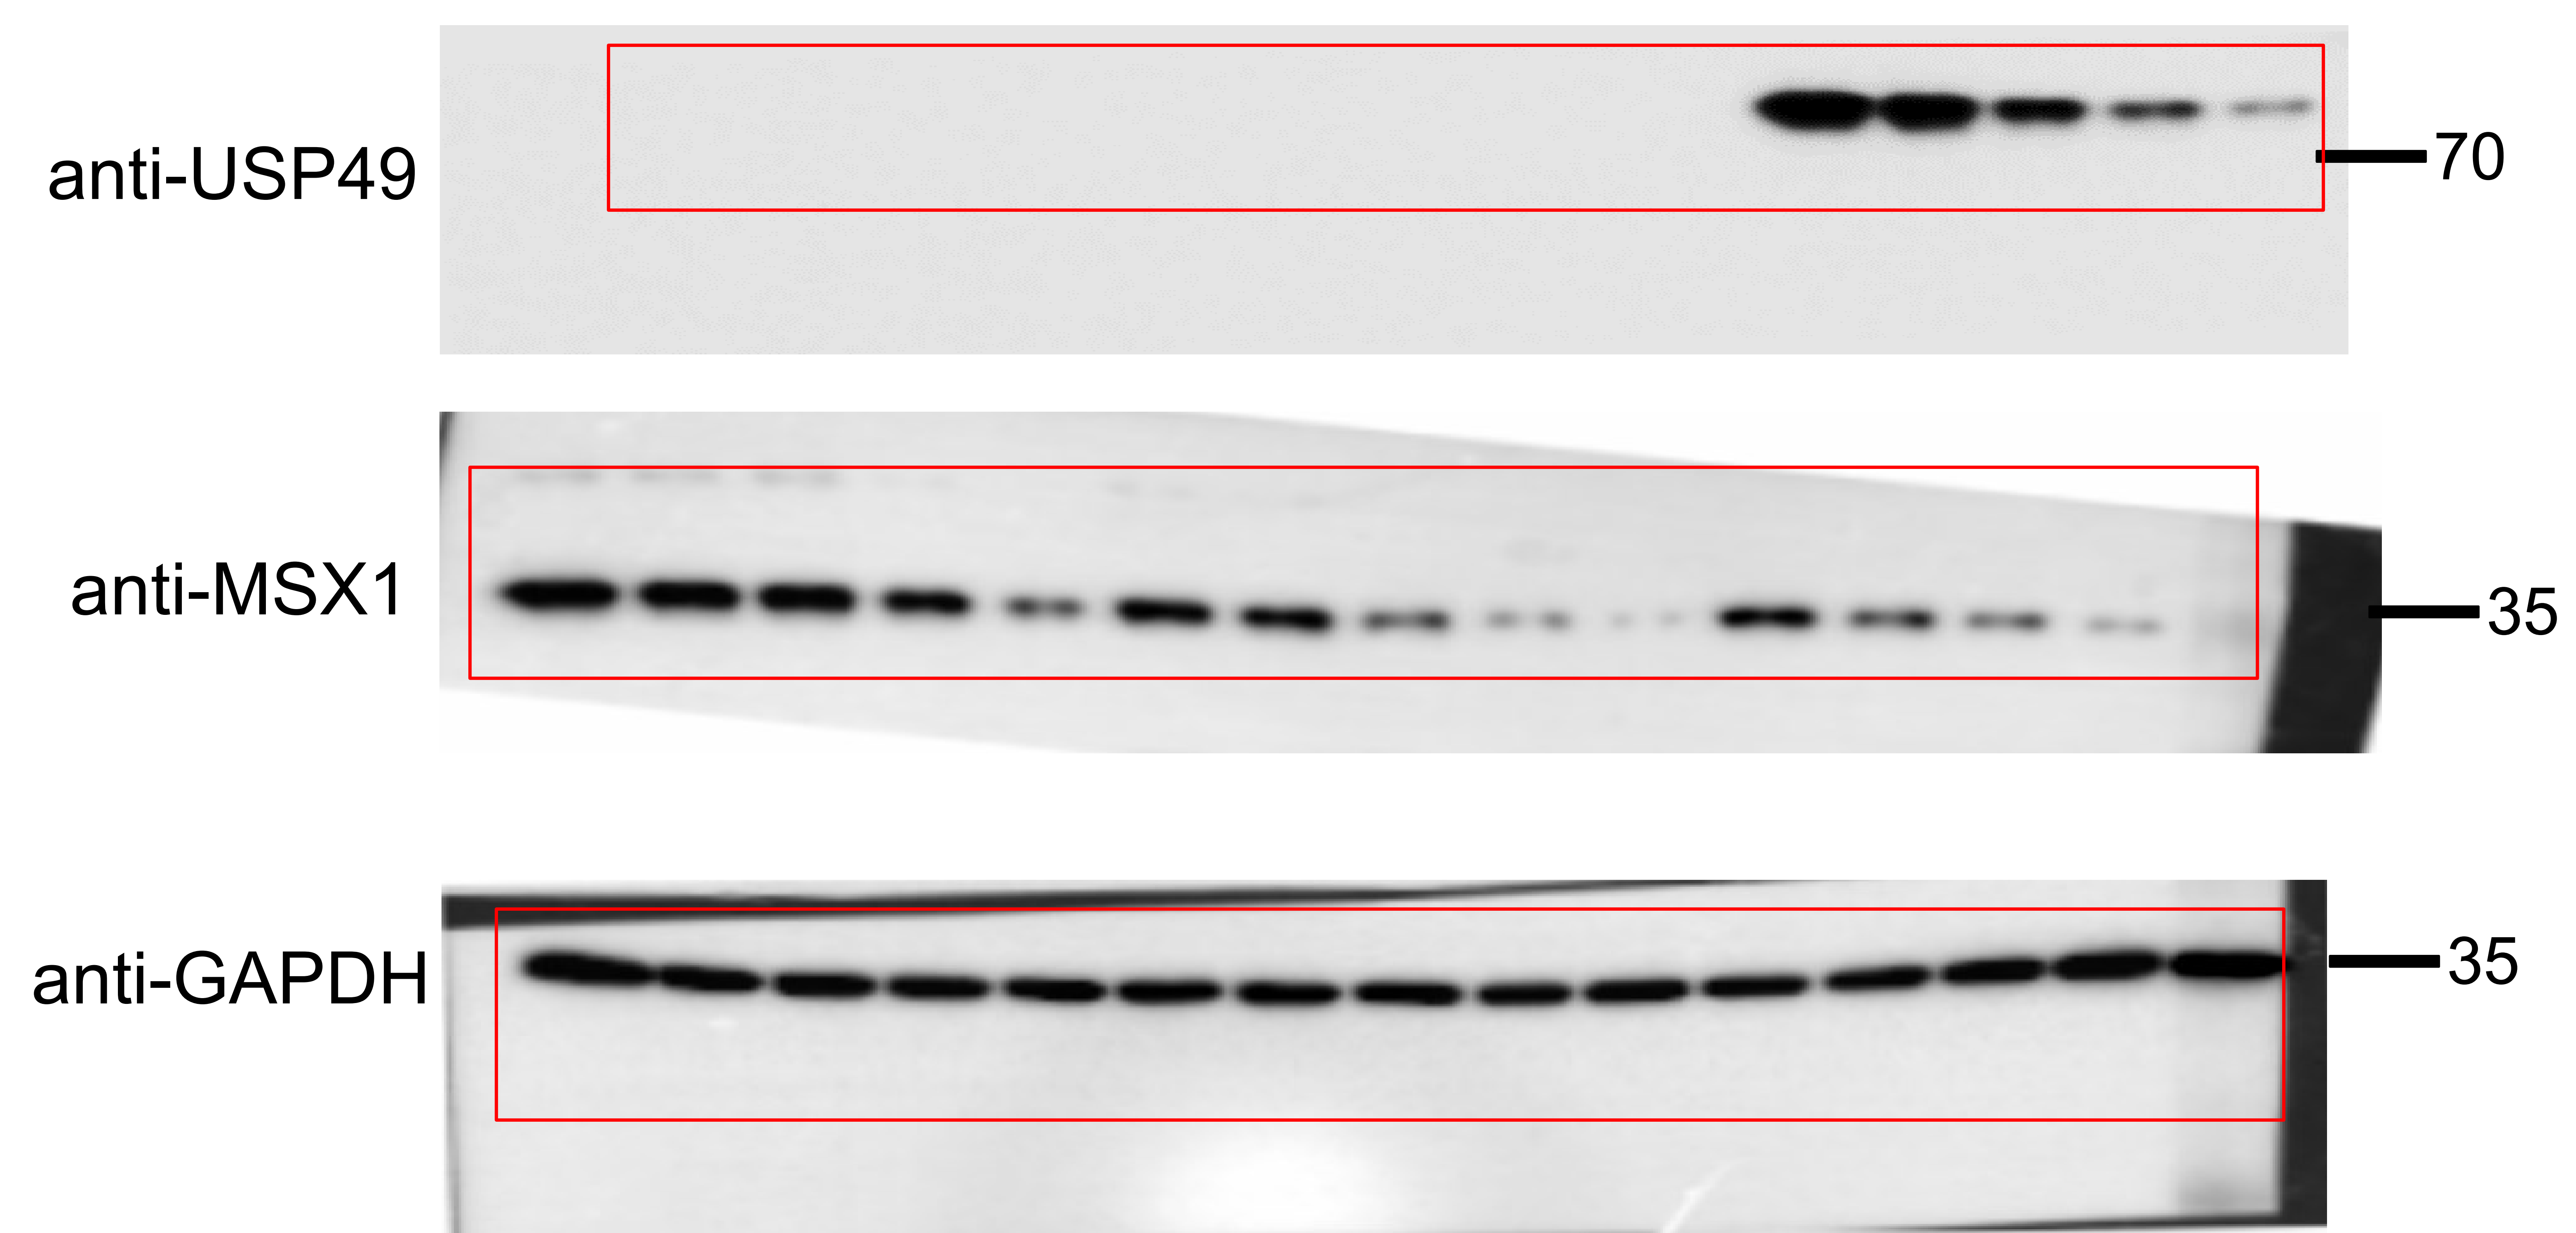

# Uncropped blots of Fig. 4

## A

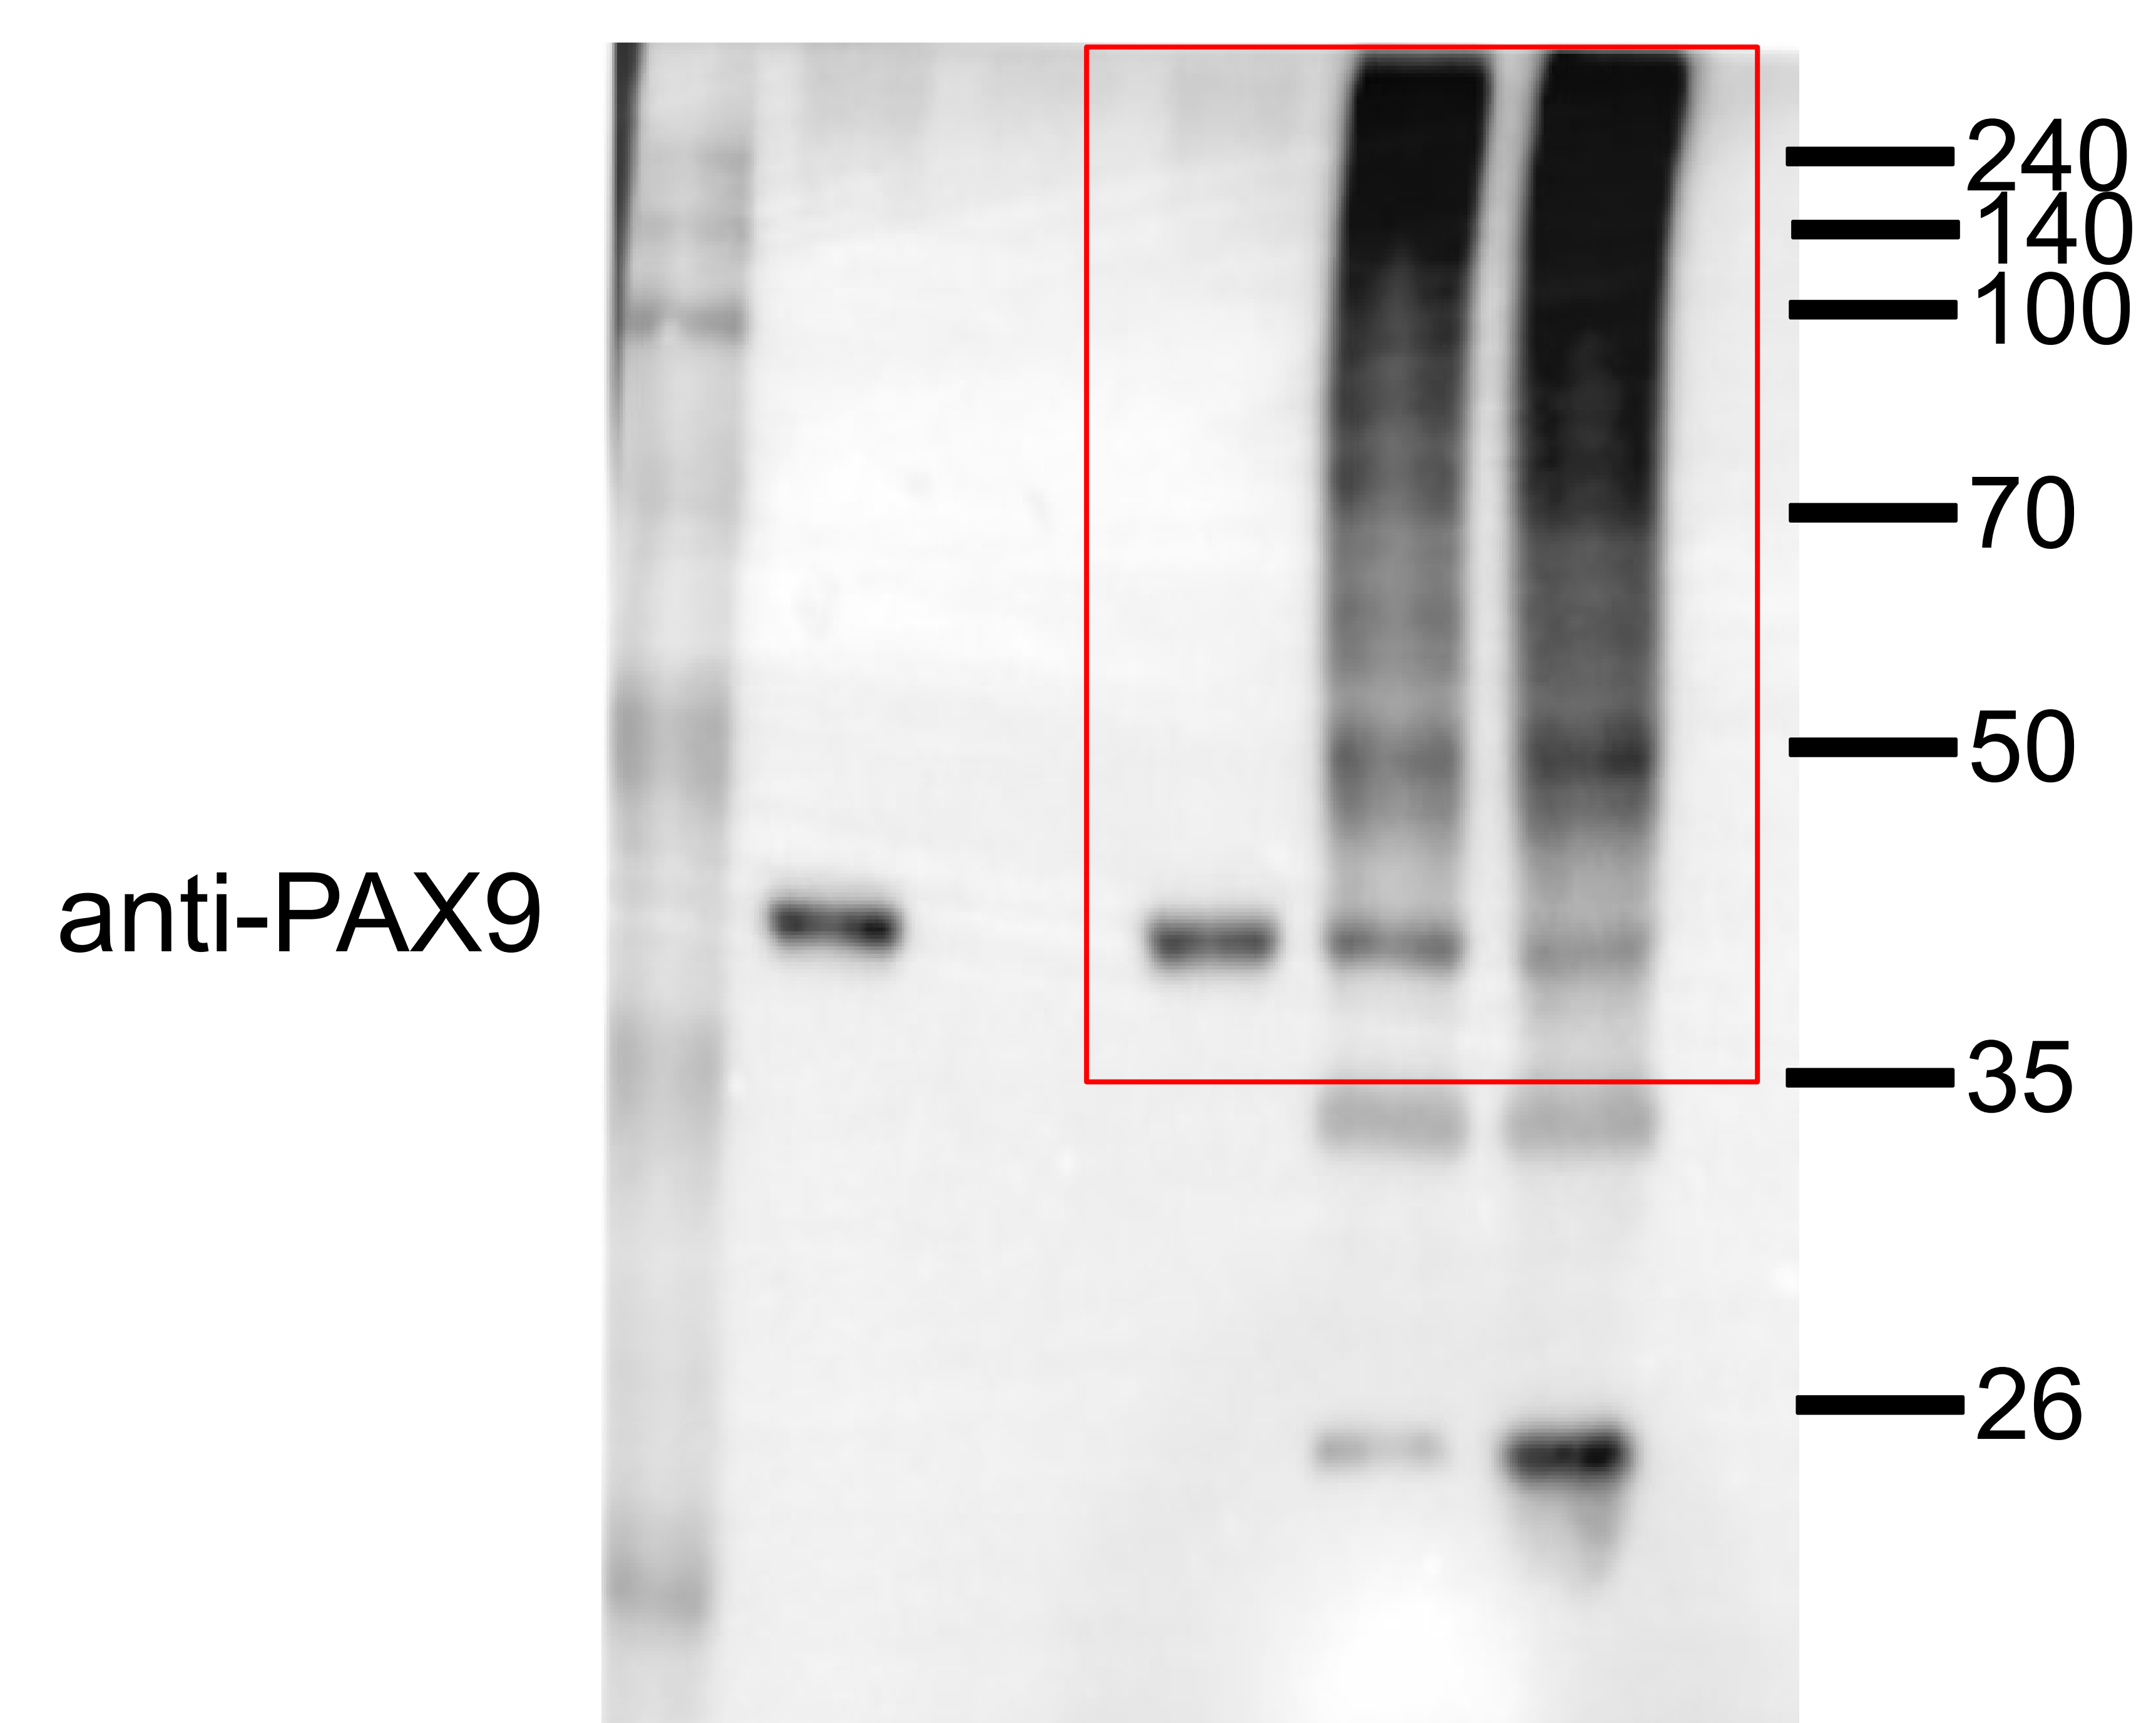

## B

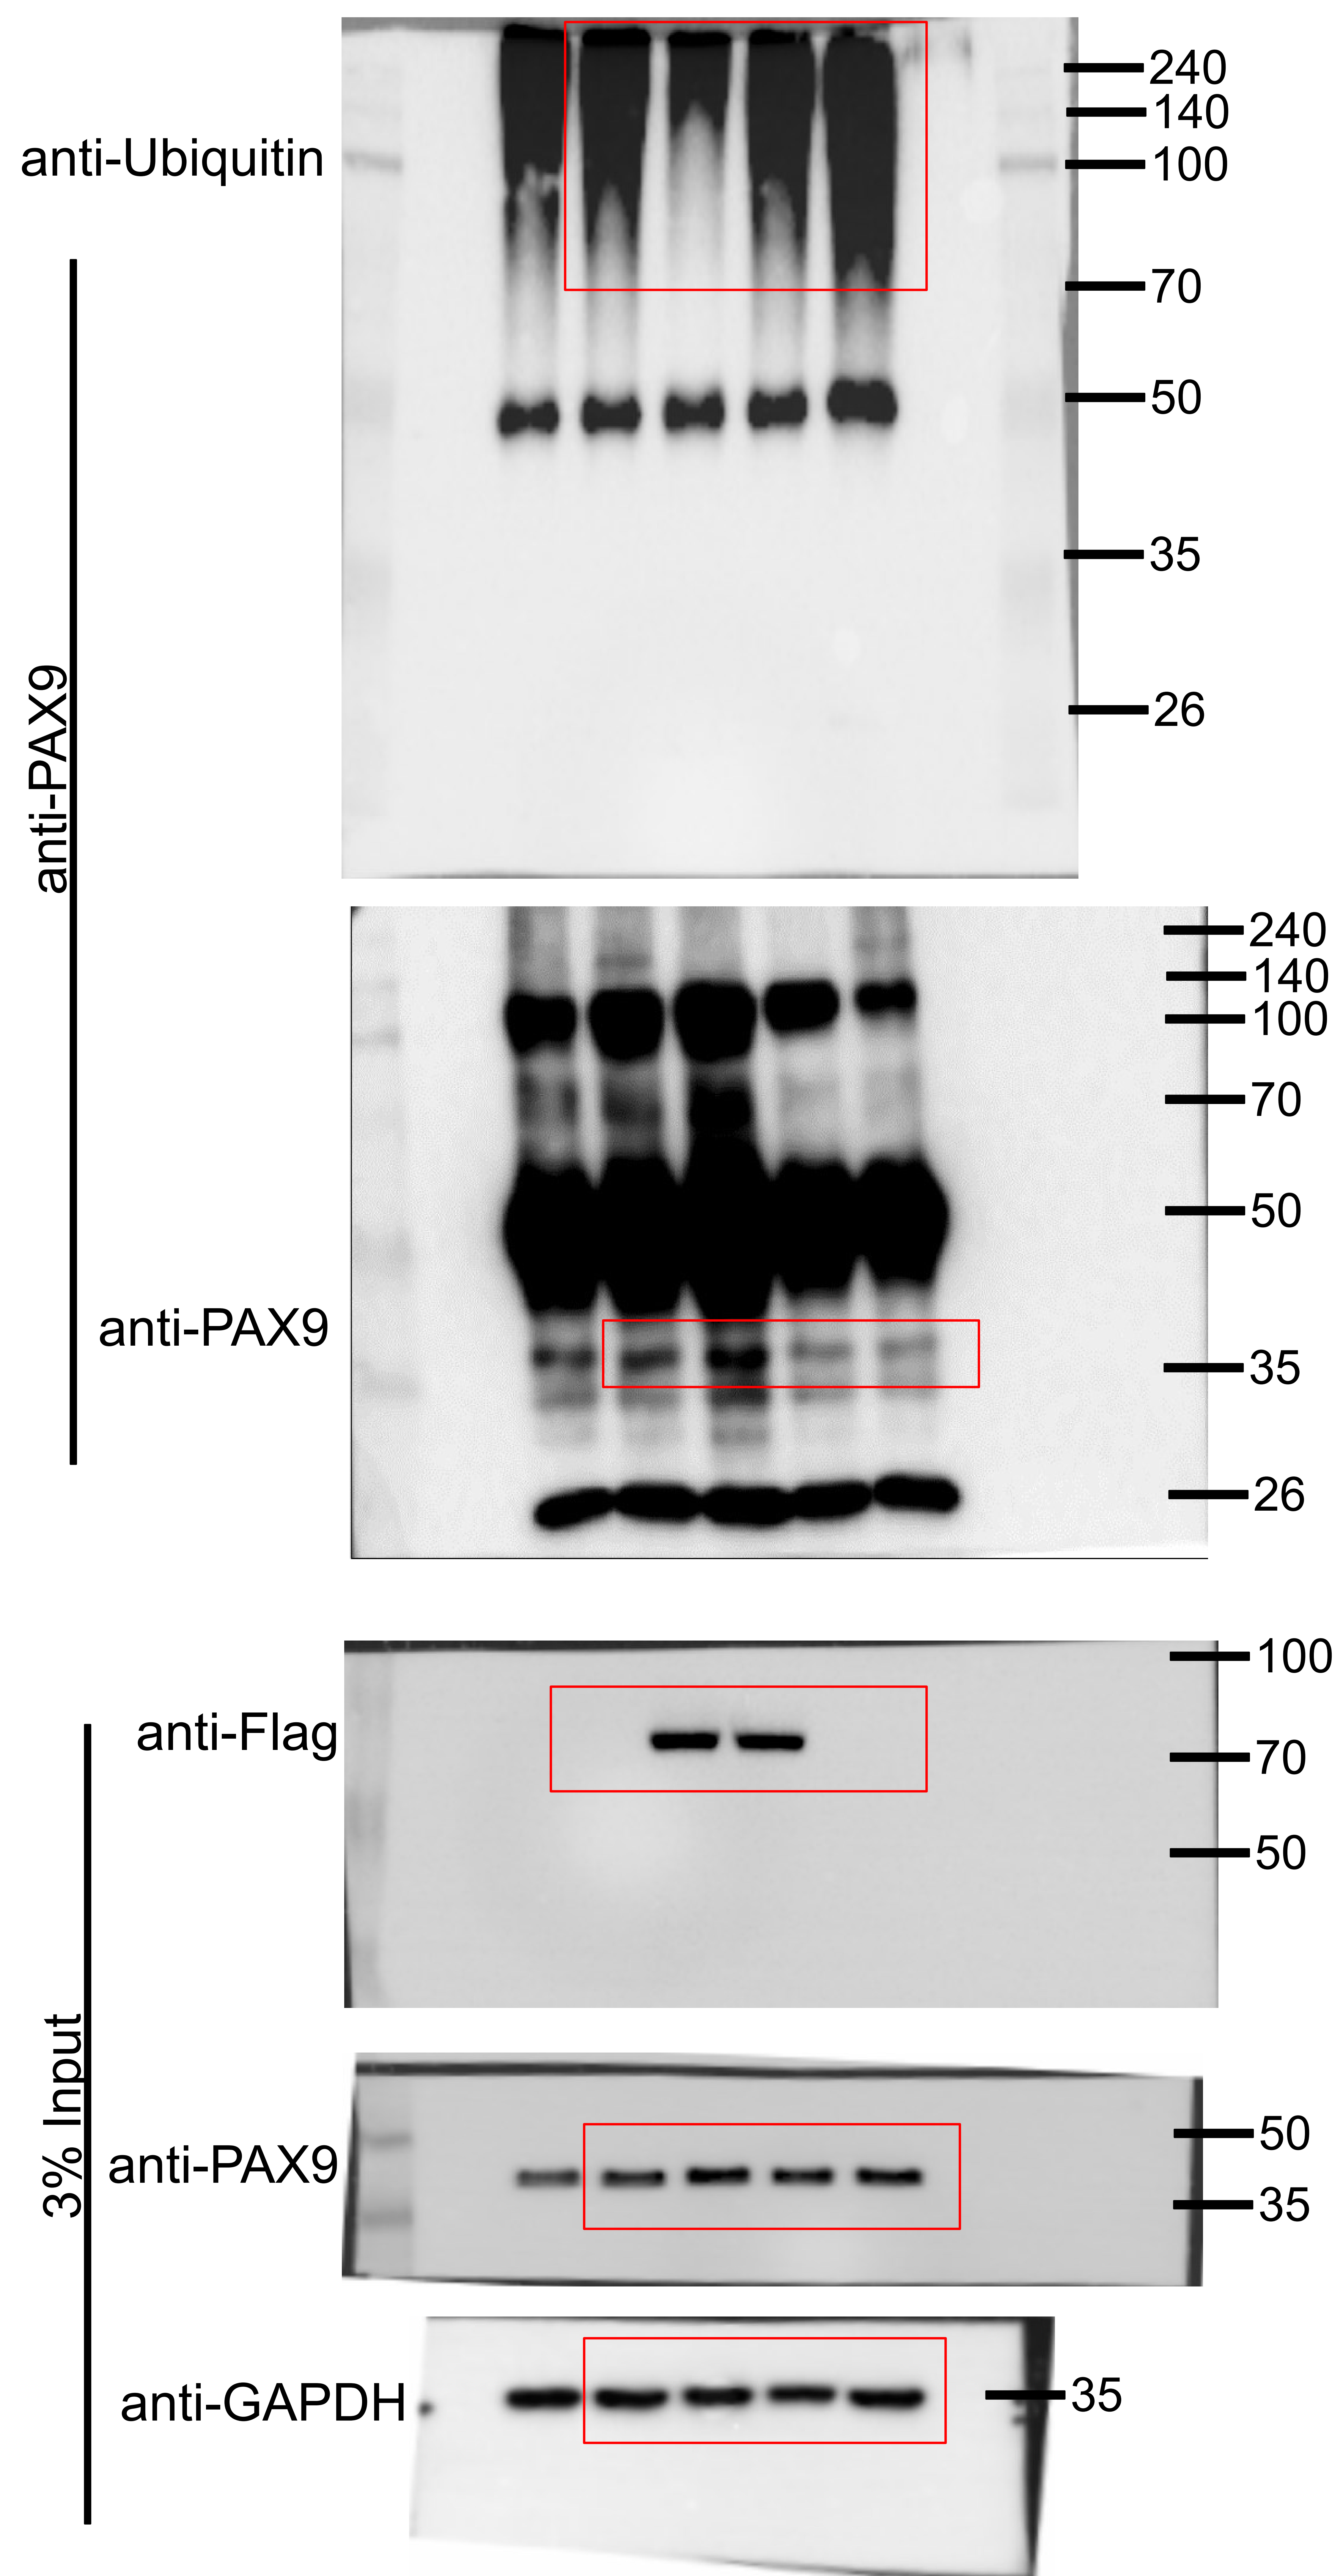

# Uncropped blots of Fig. 4

## C

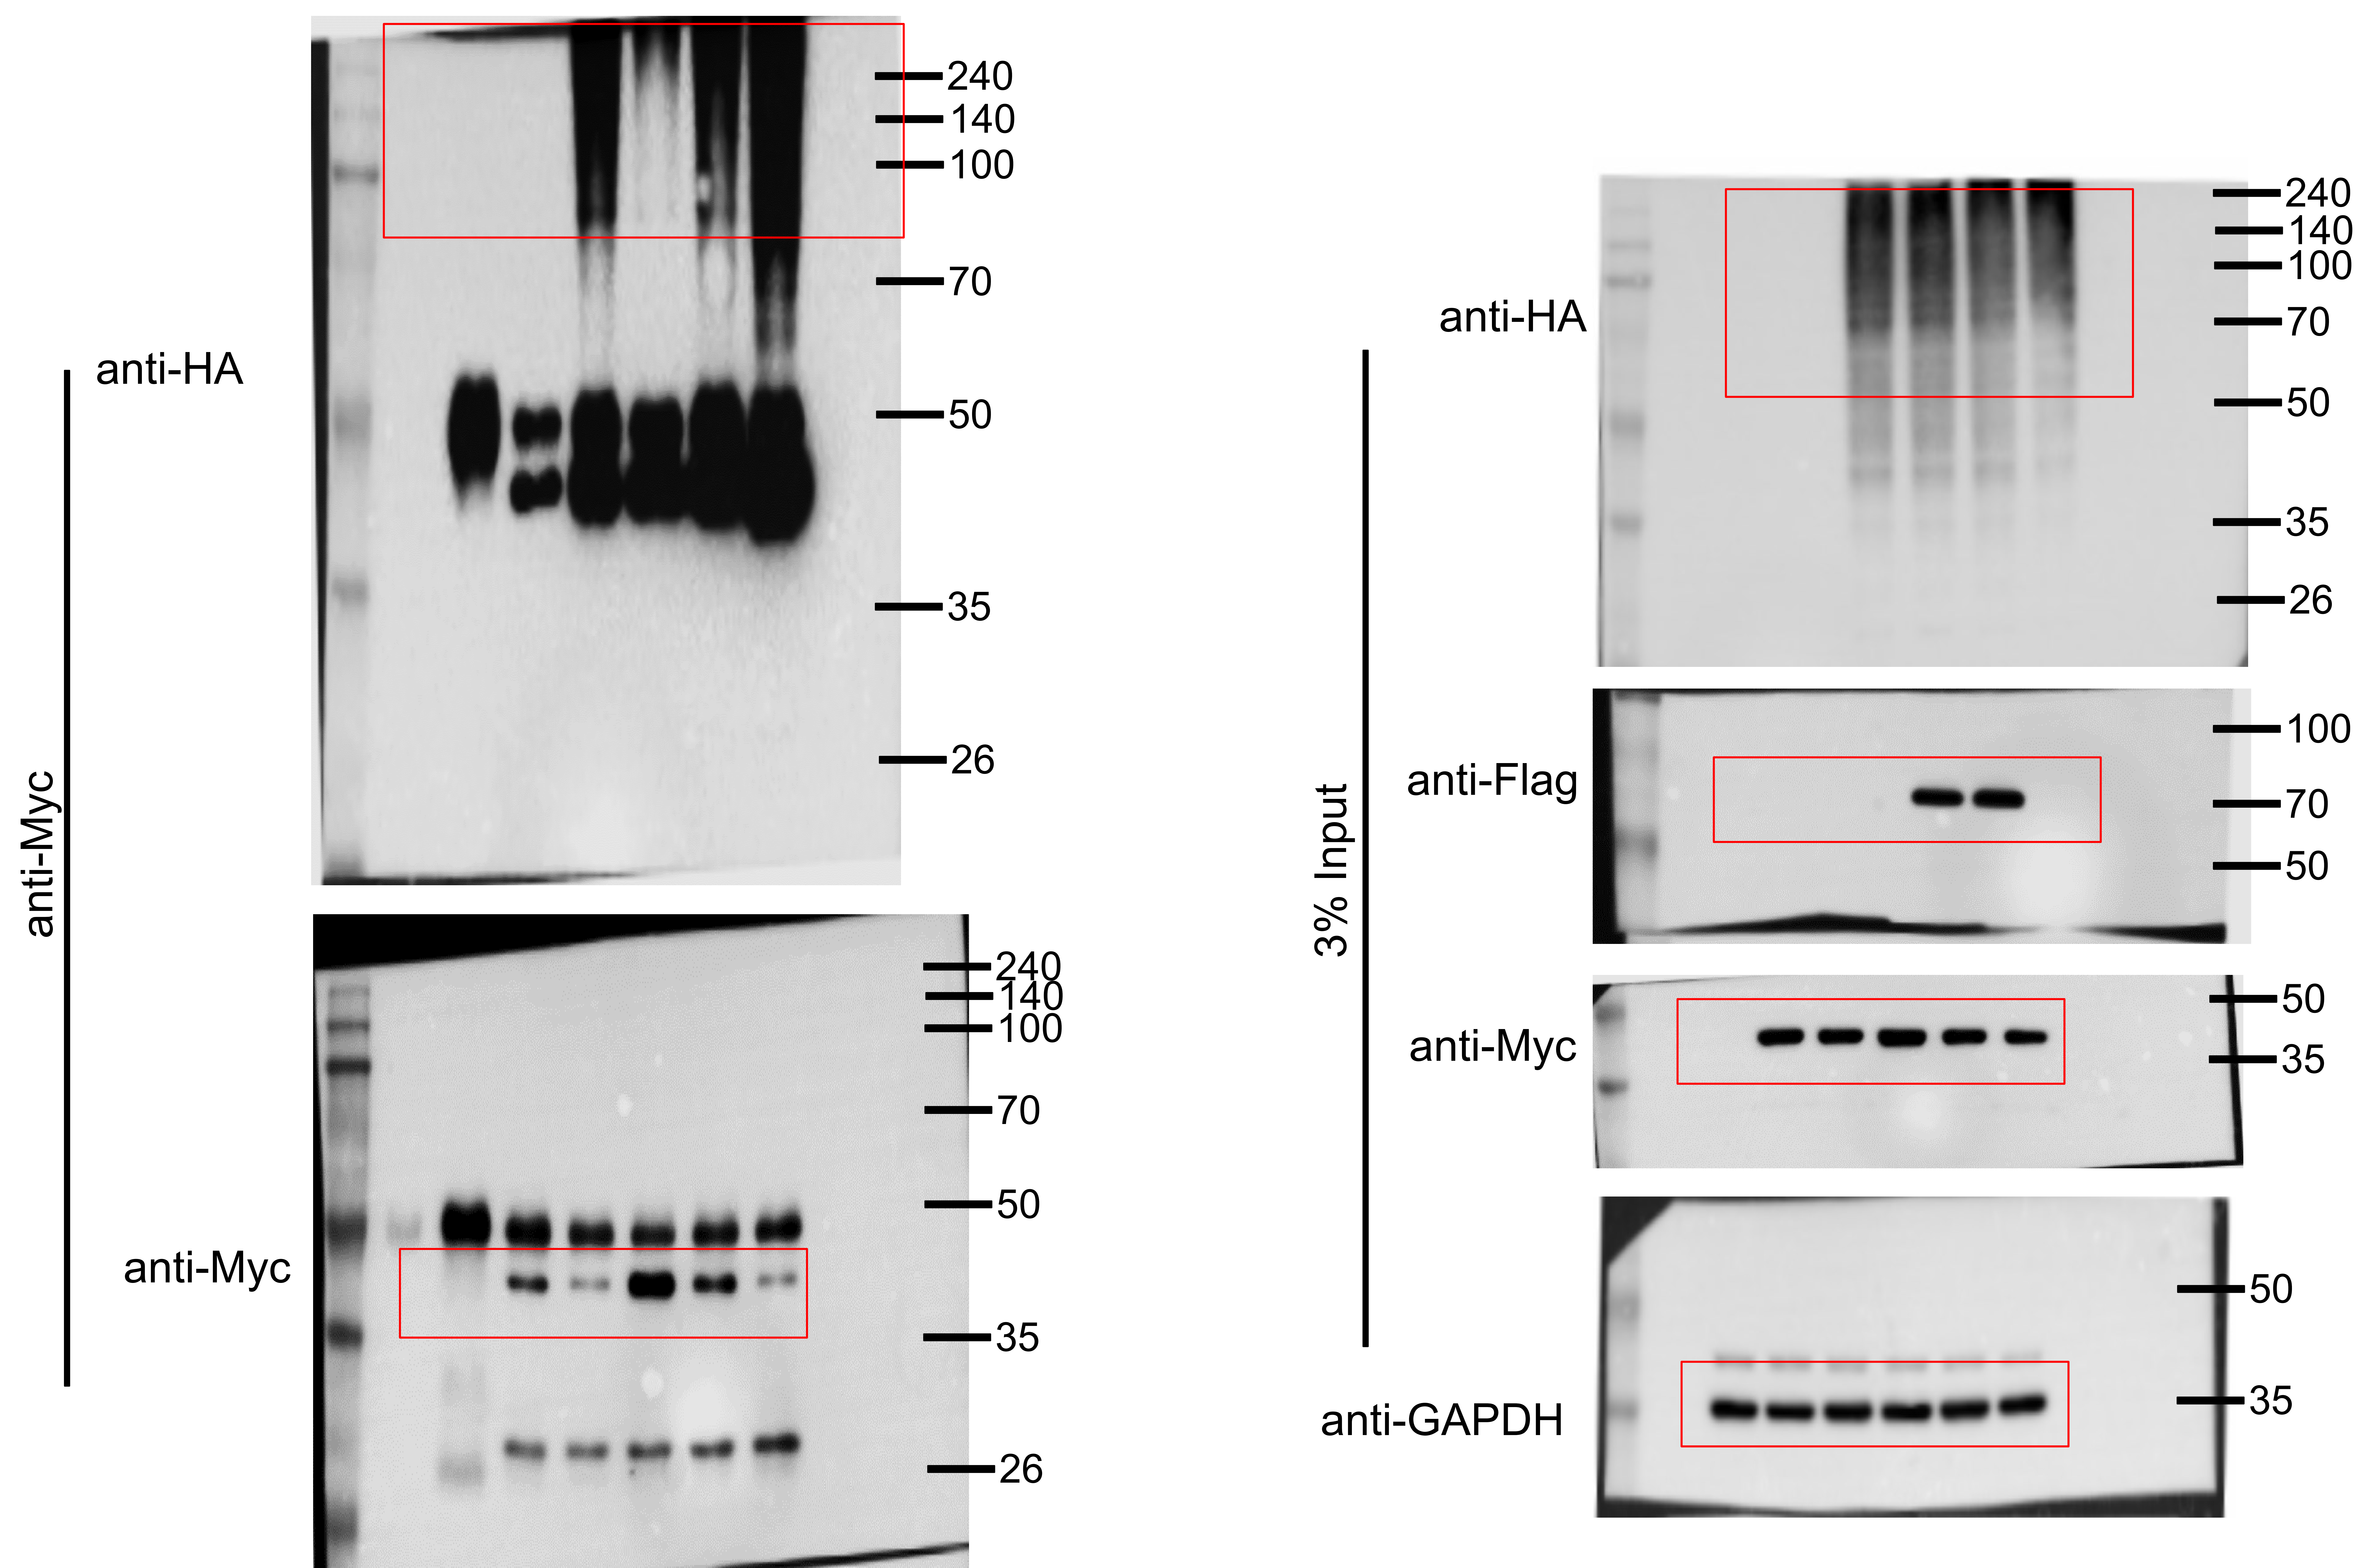

# Uncropped blots of Fig. 4

## D

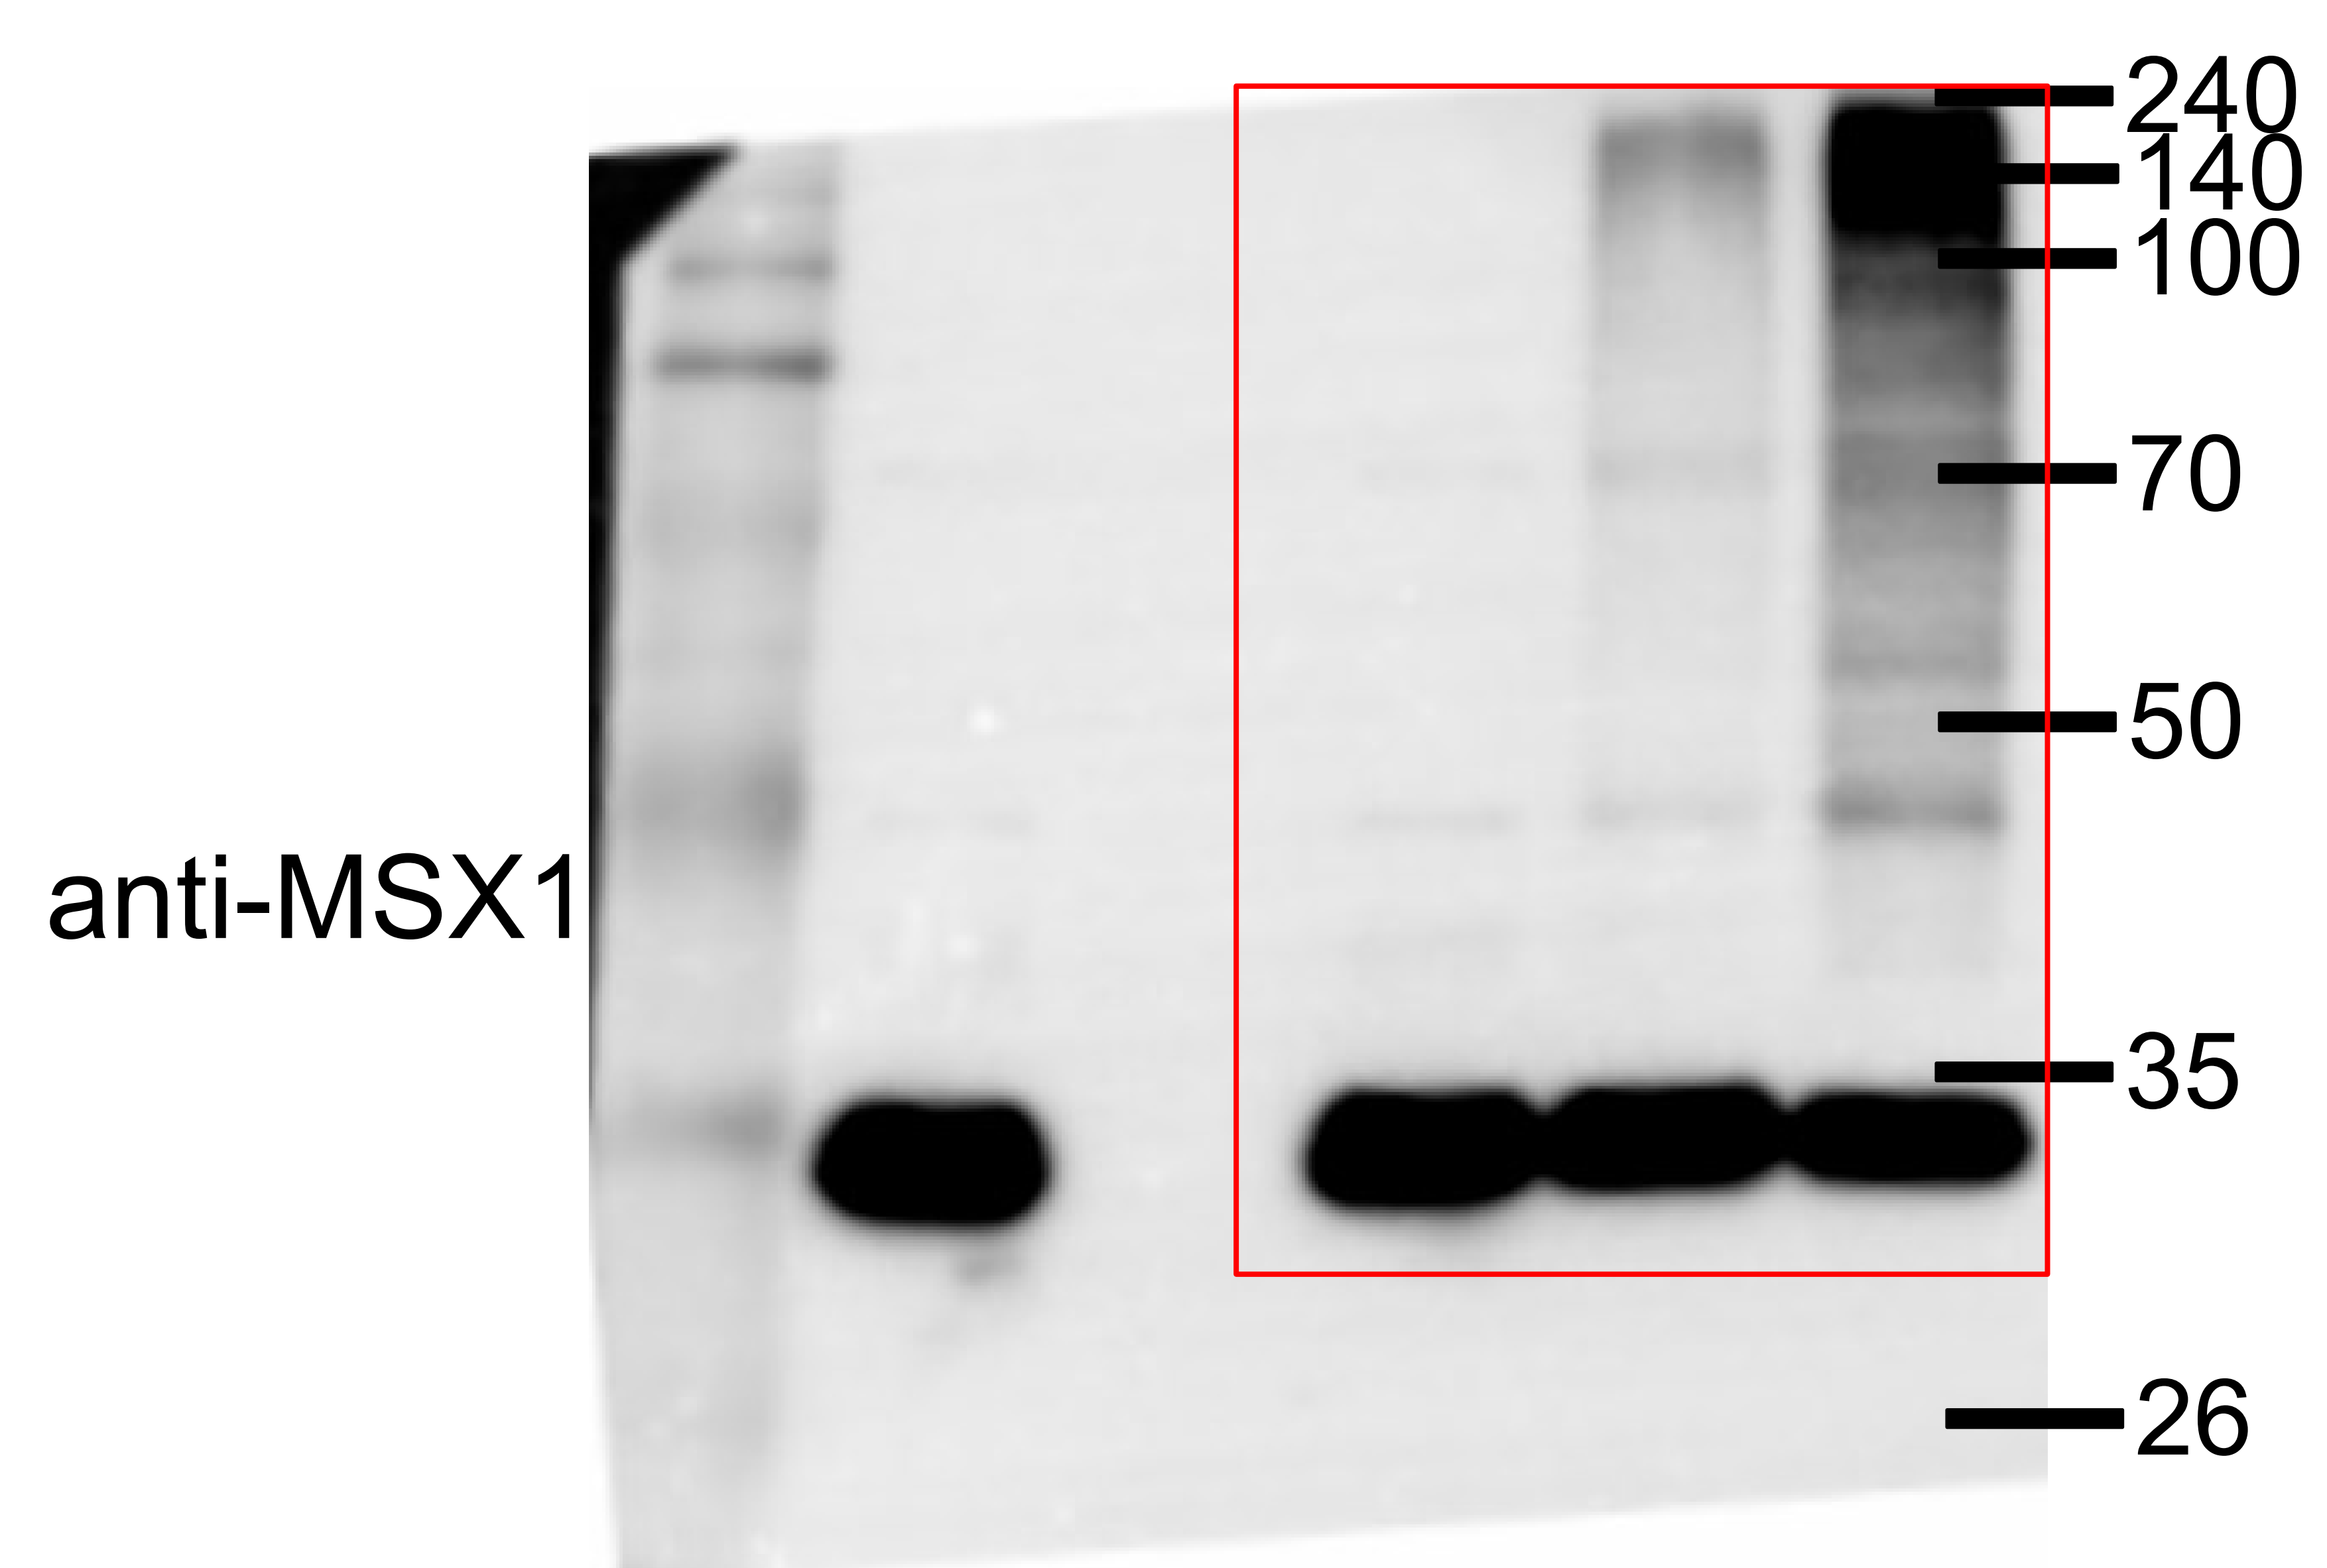

## E

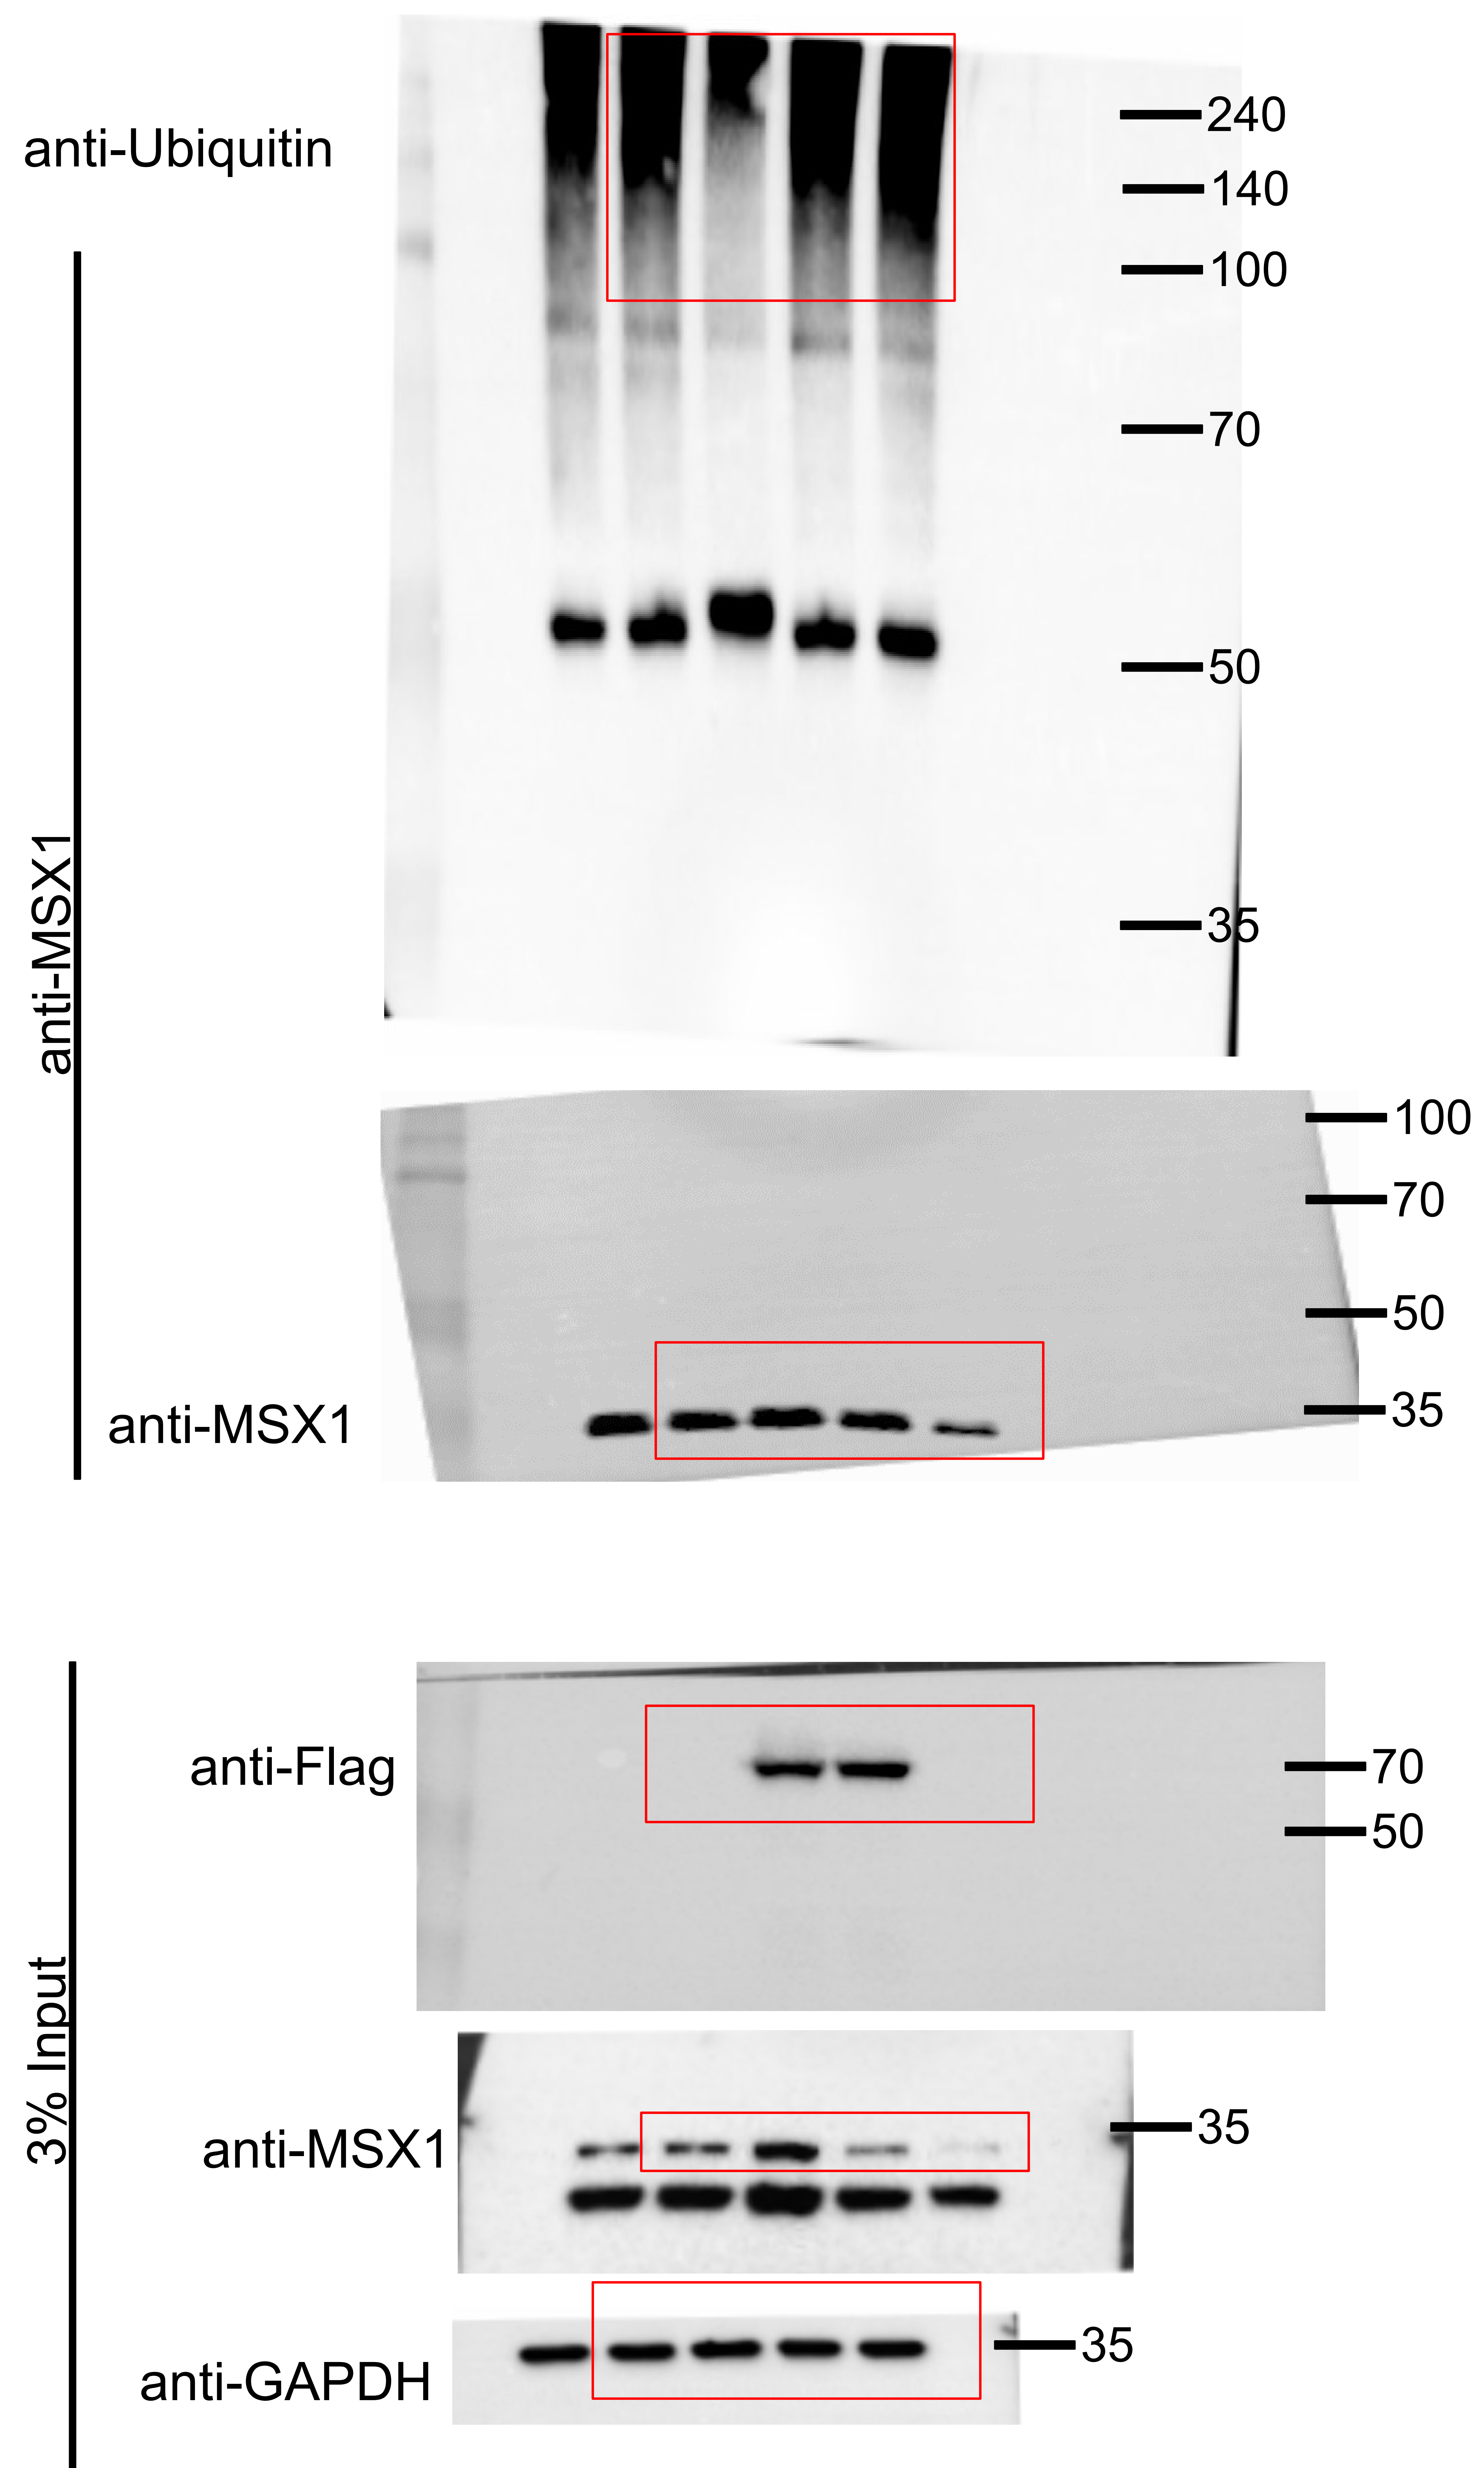

# Uncropped blots of Fig. 4

## F

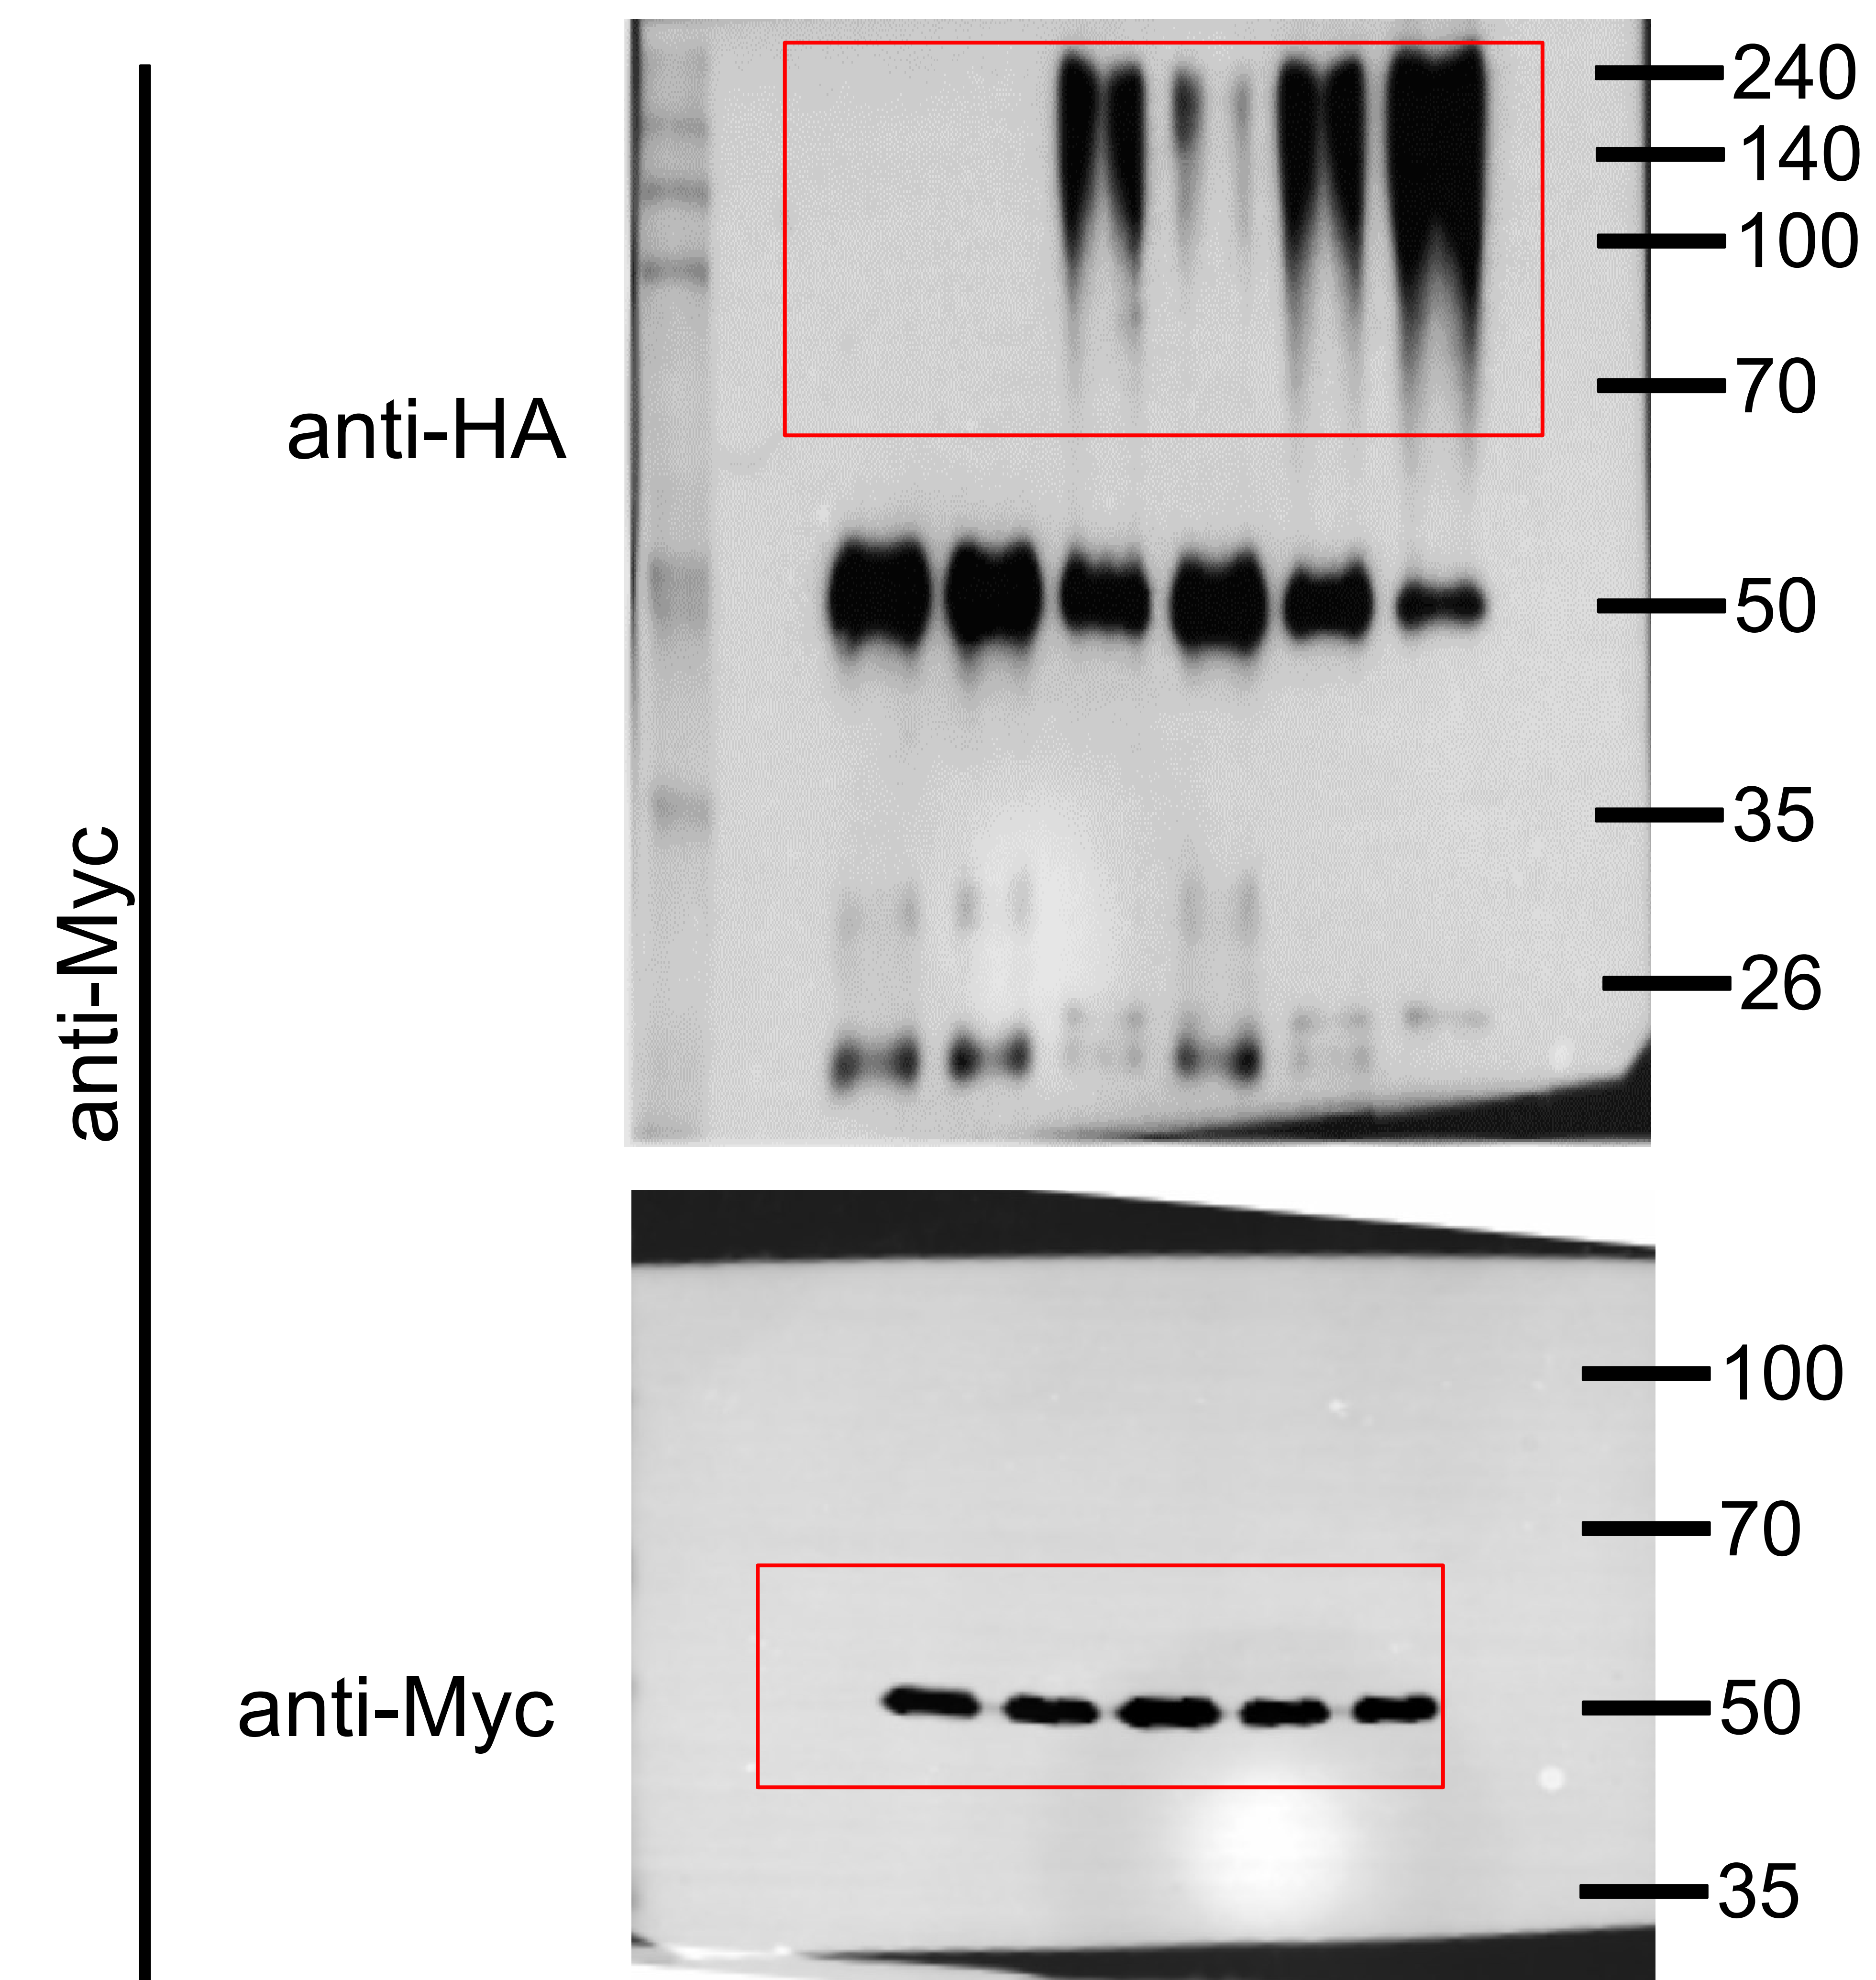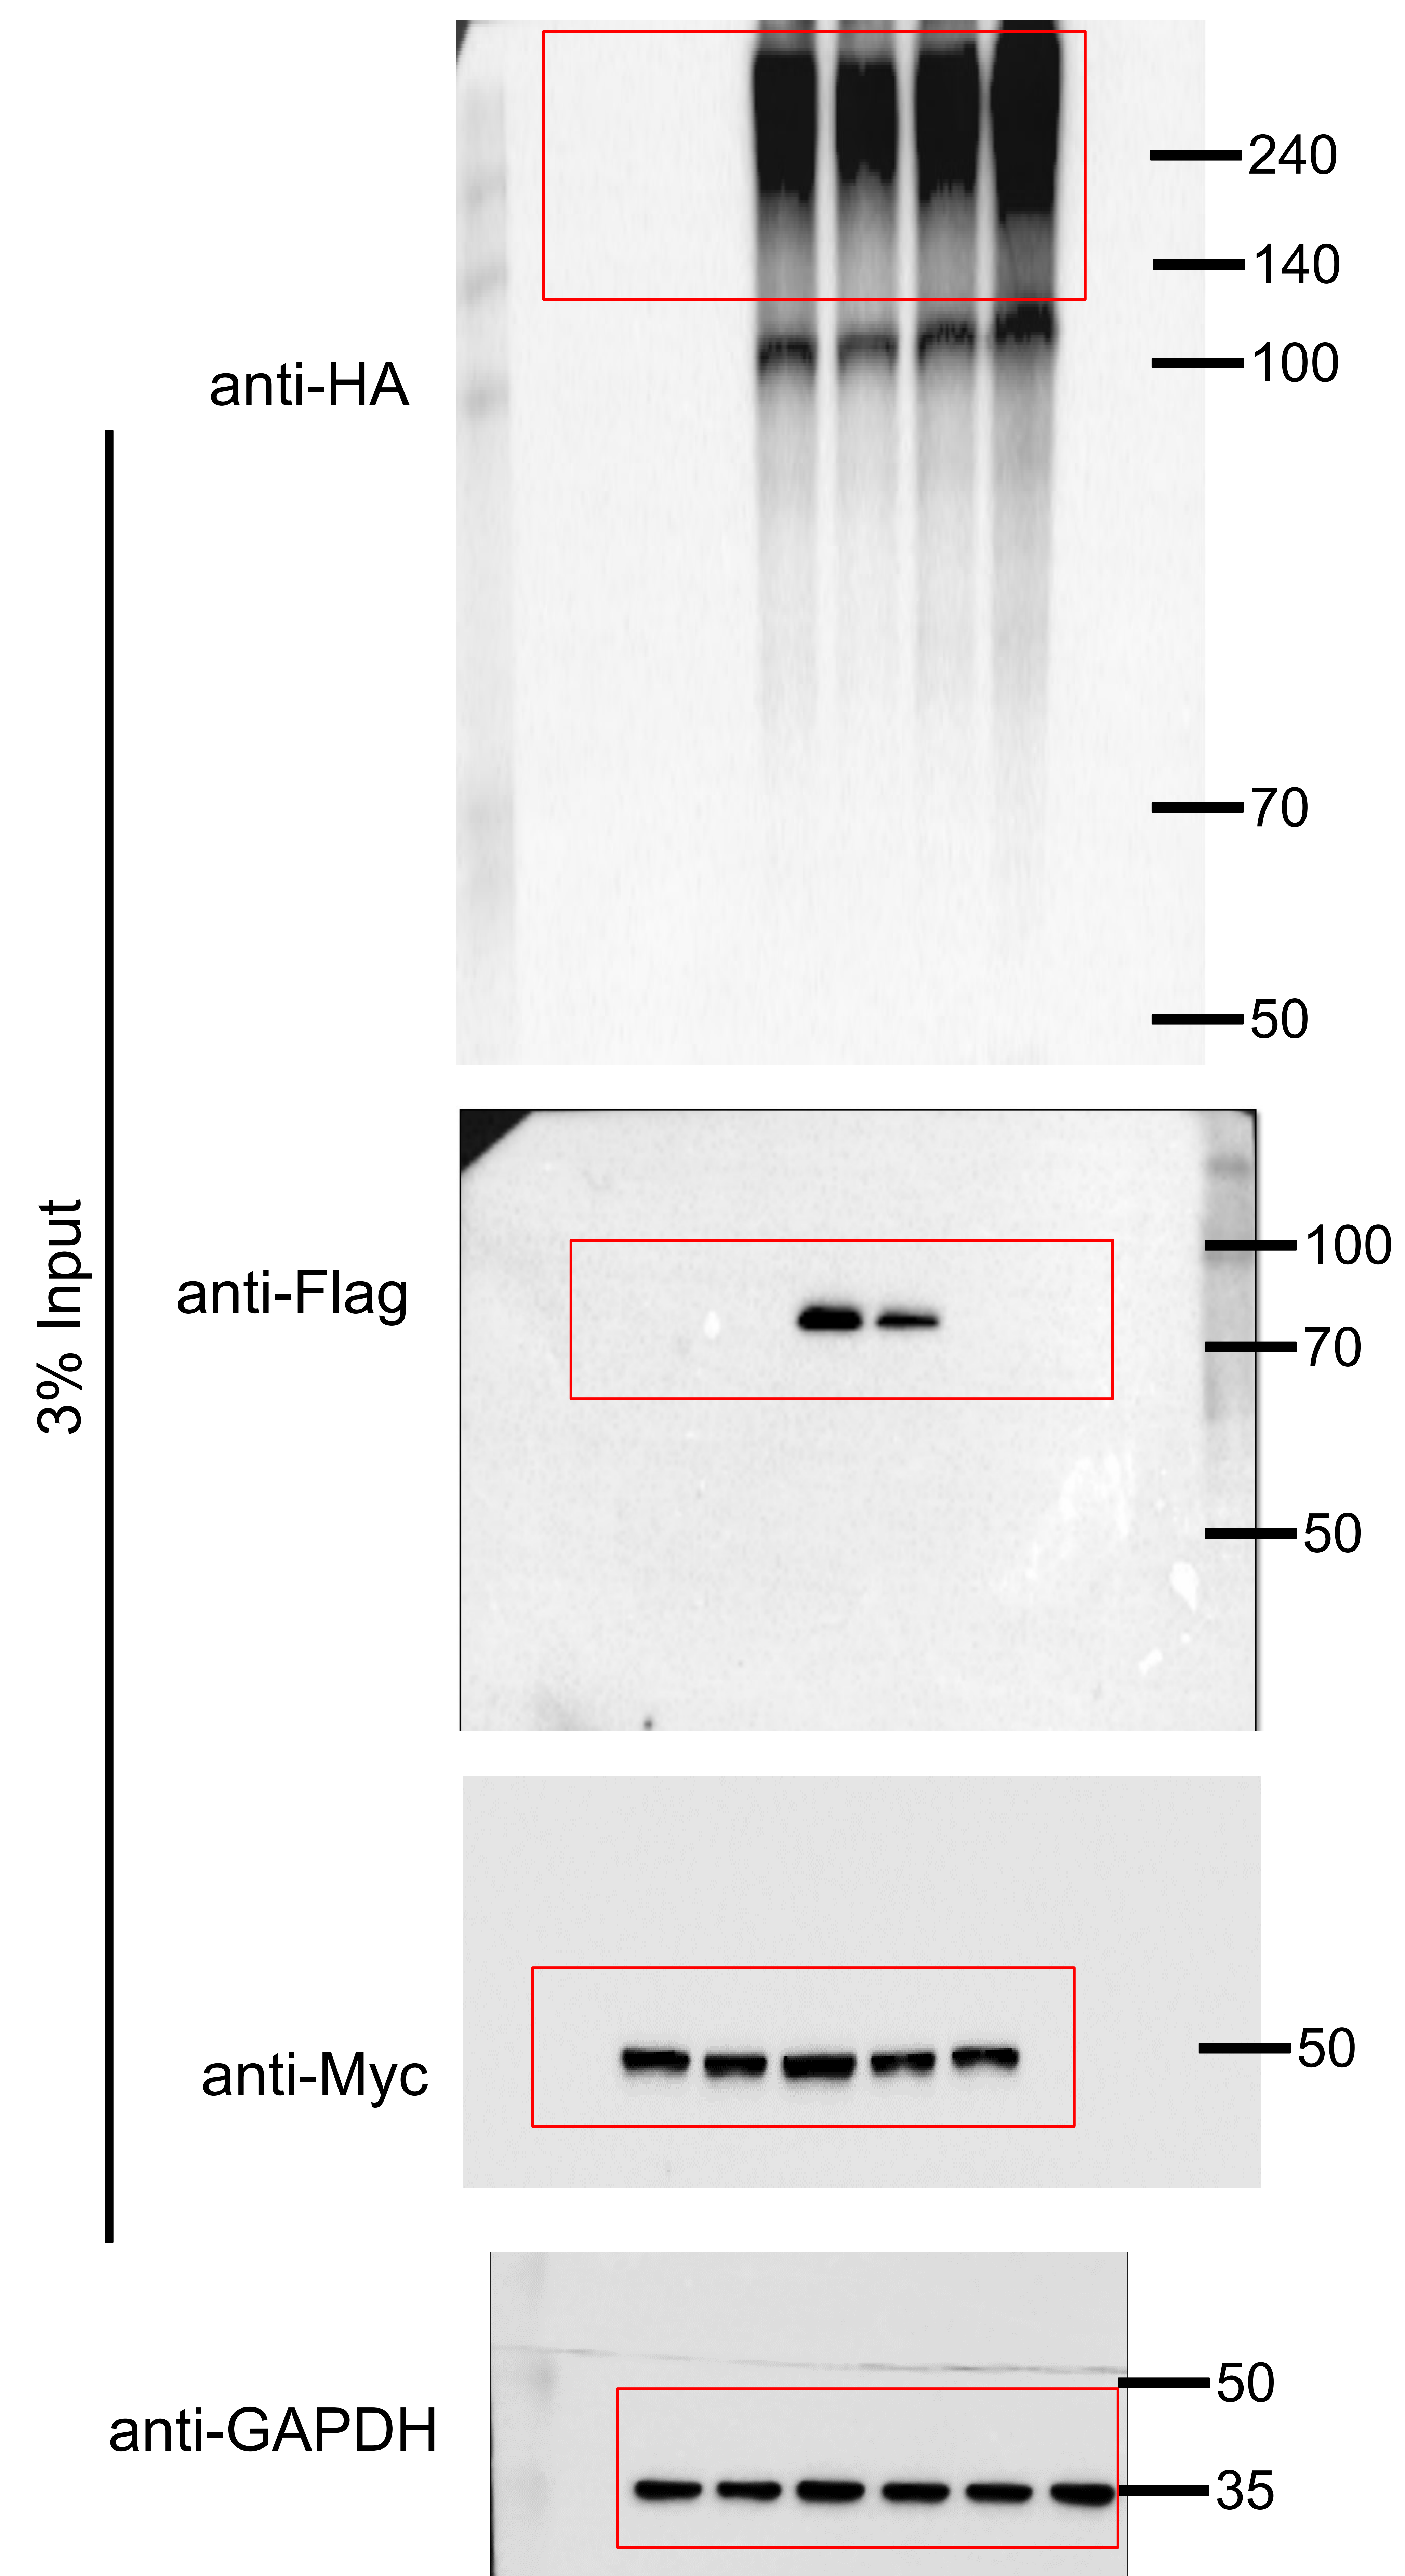

# Uncropped blots of Fig. 5

## B

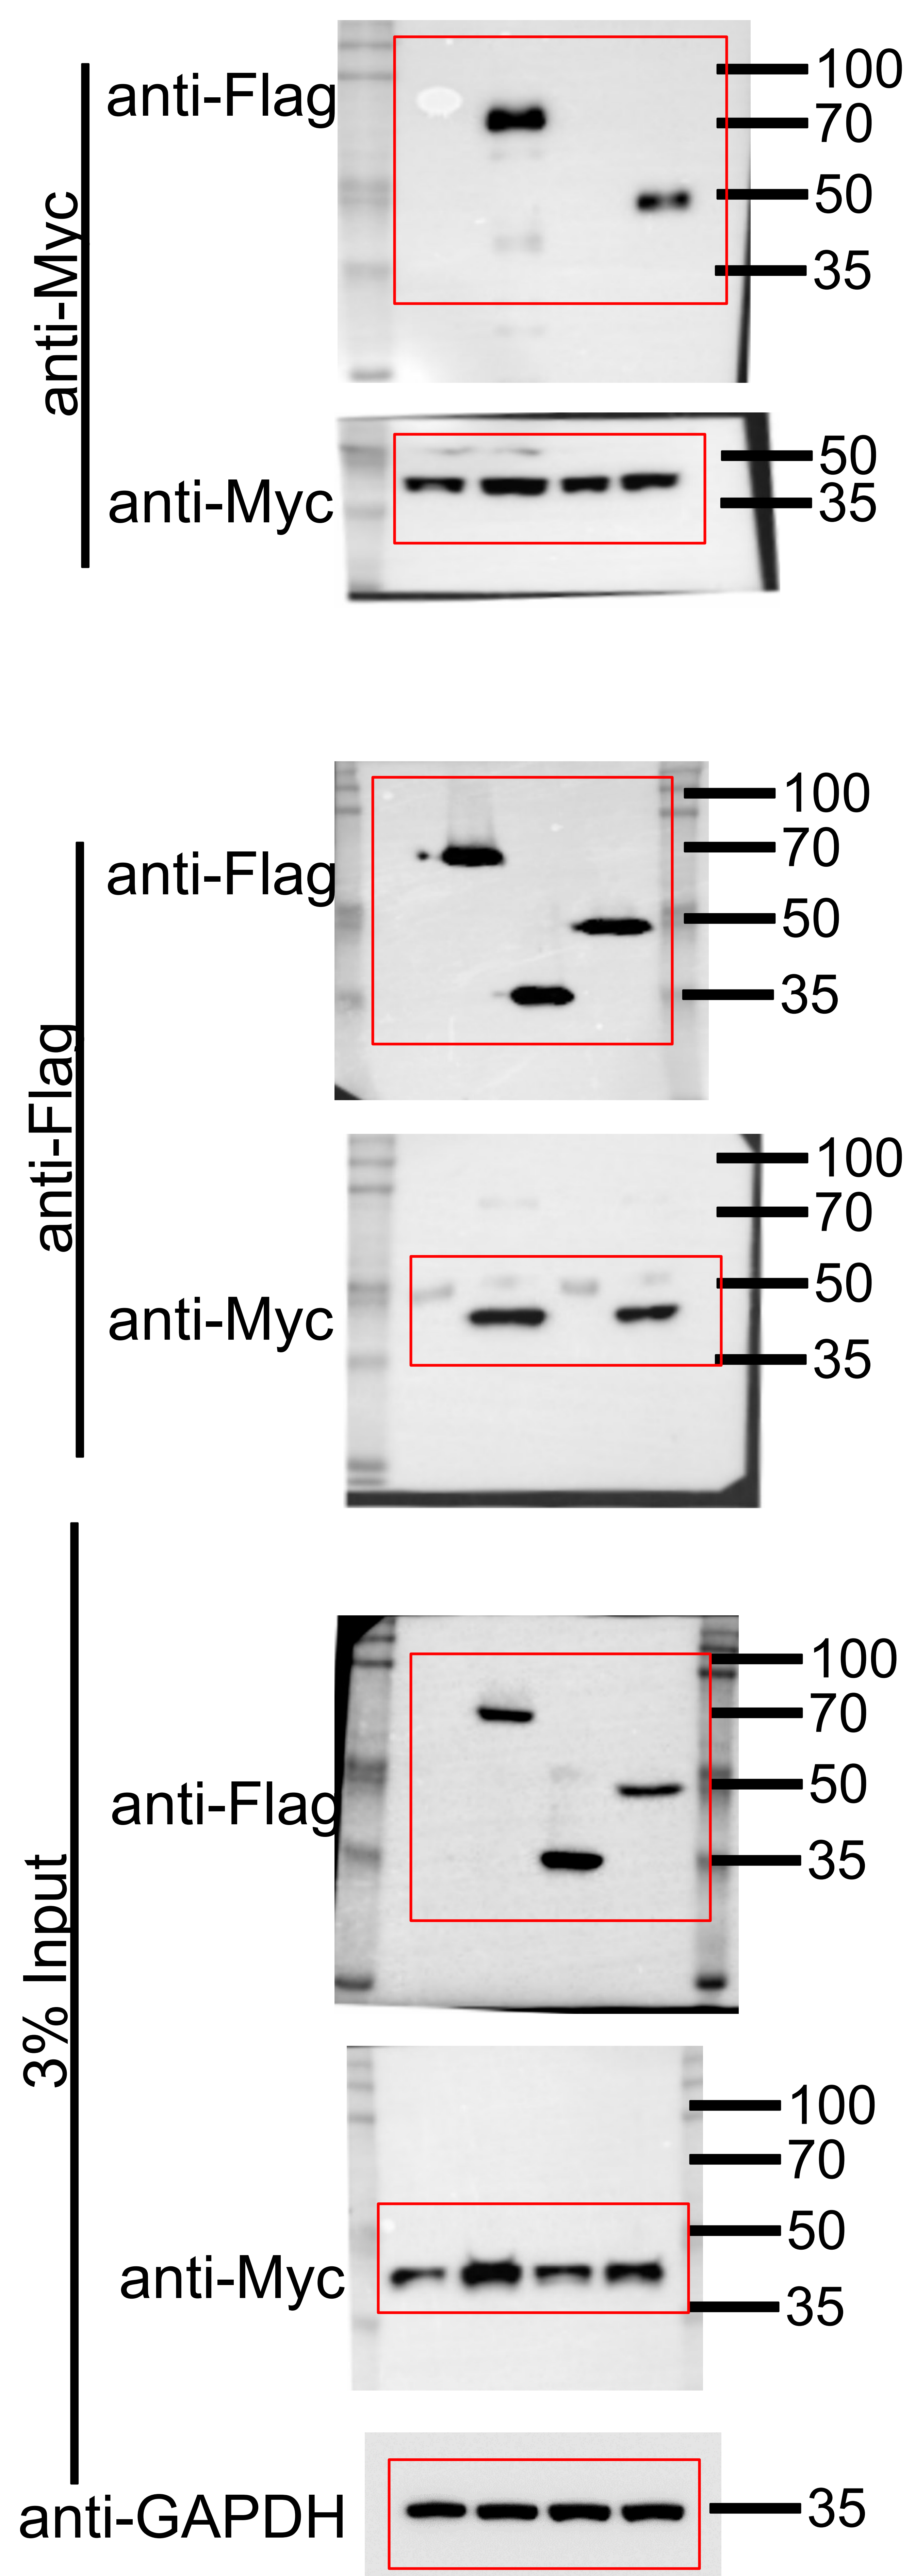

## C

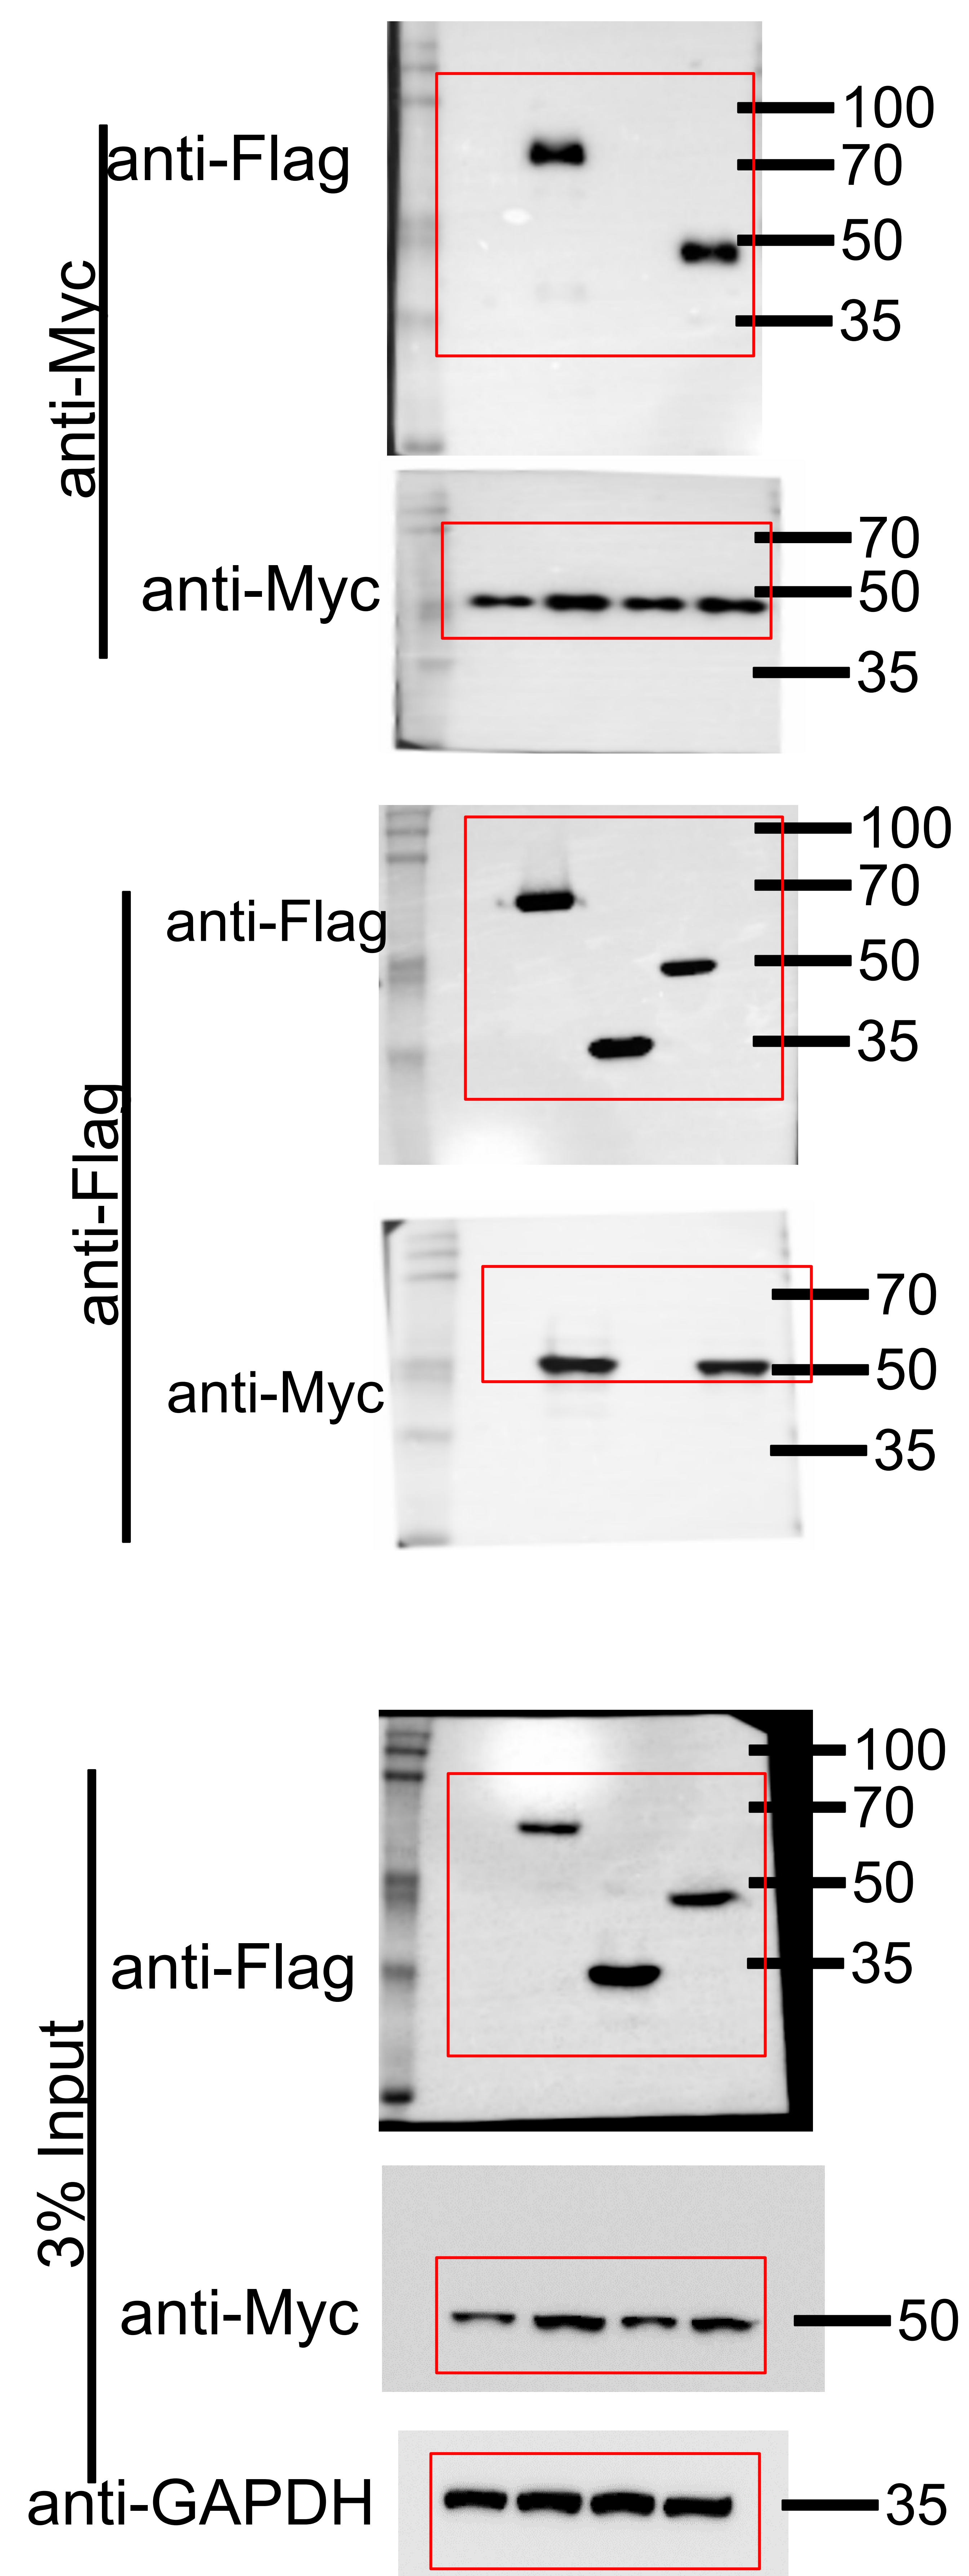

# Uncropped blots of Fig. 5

## D

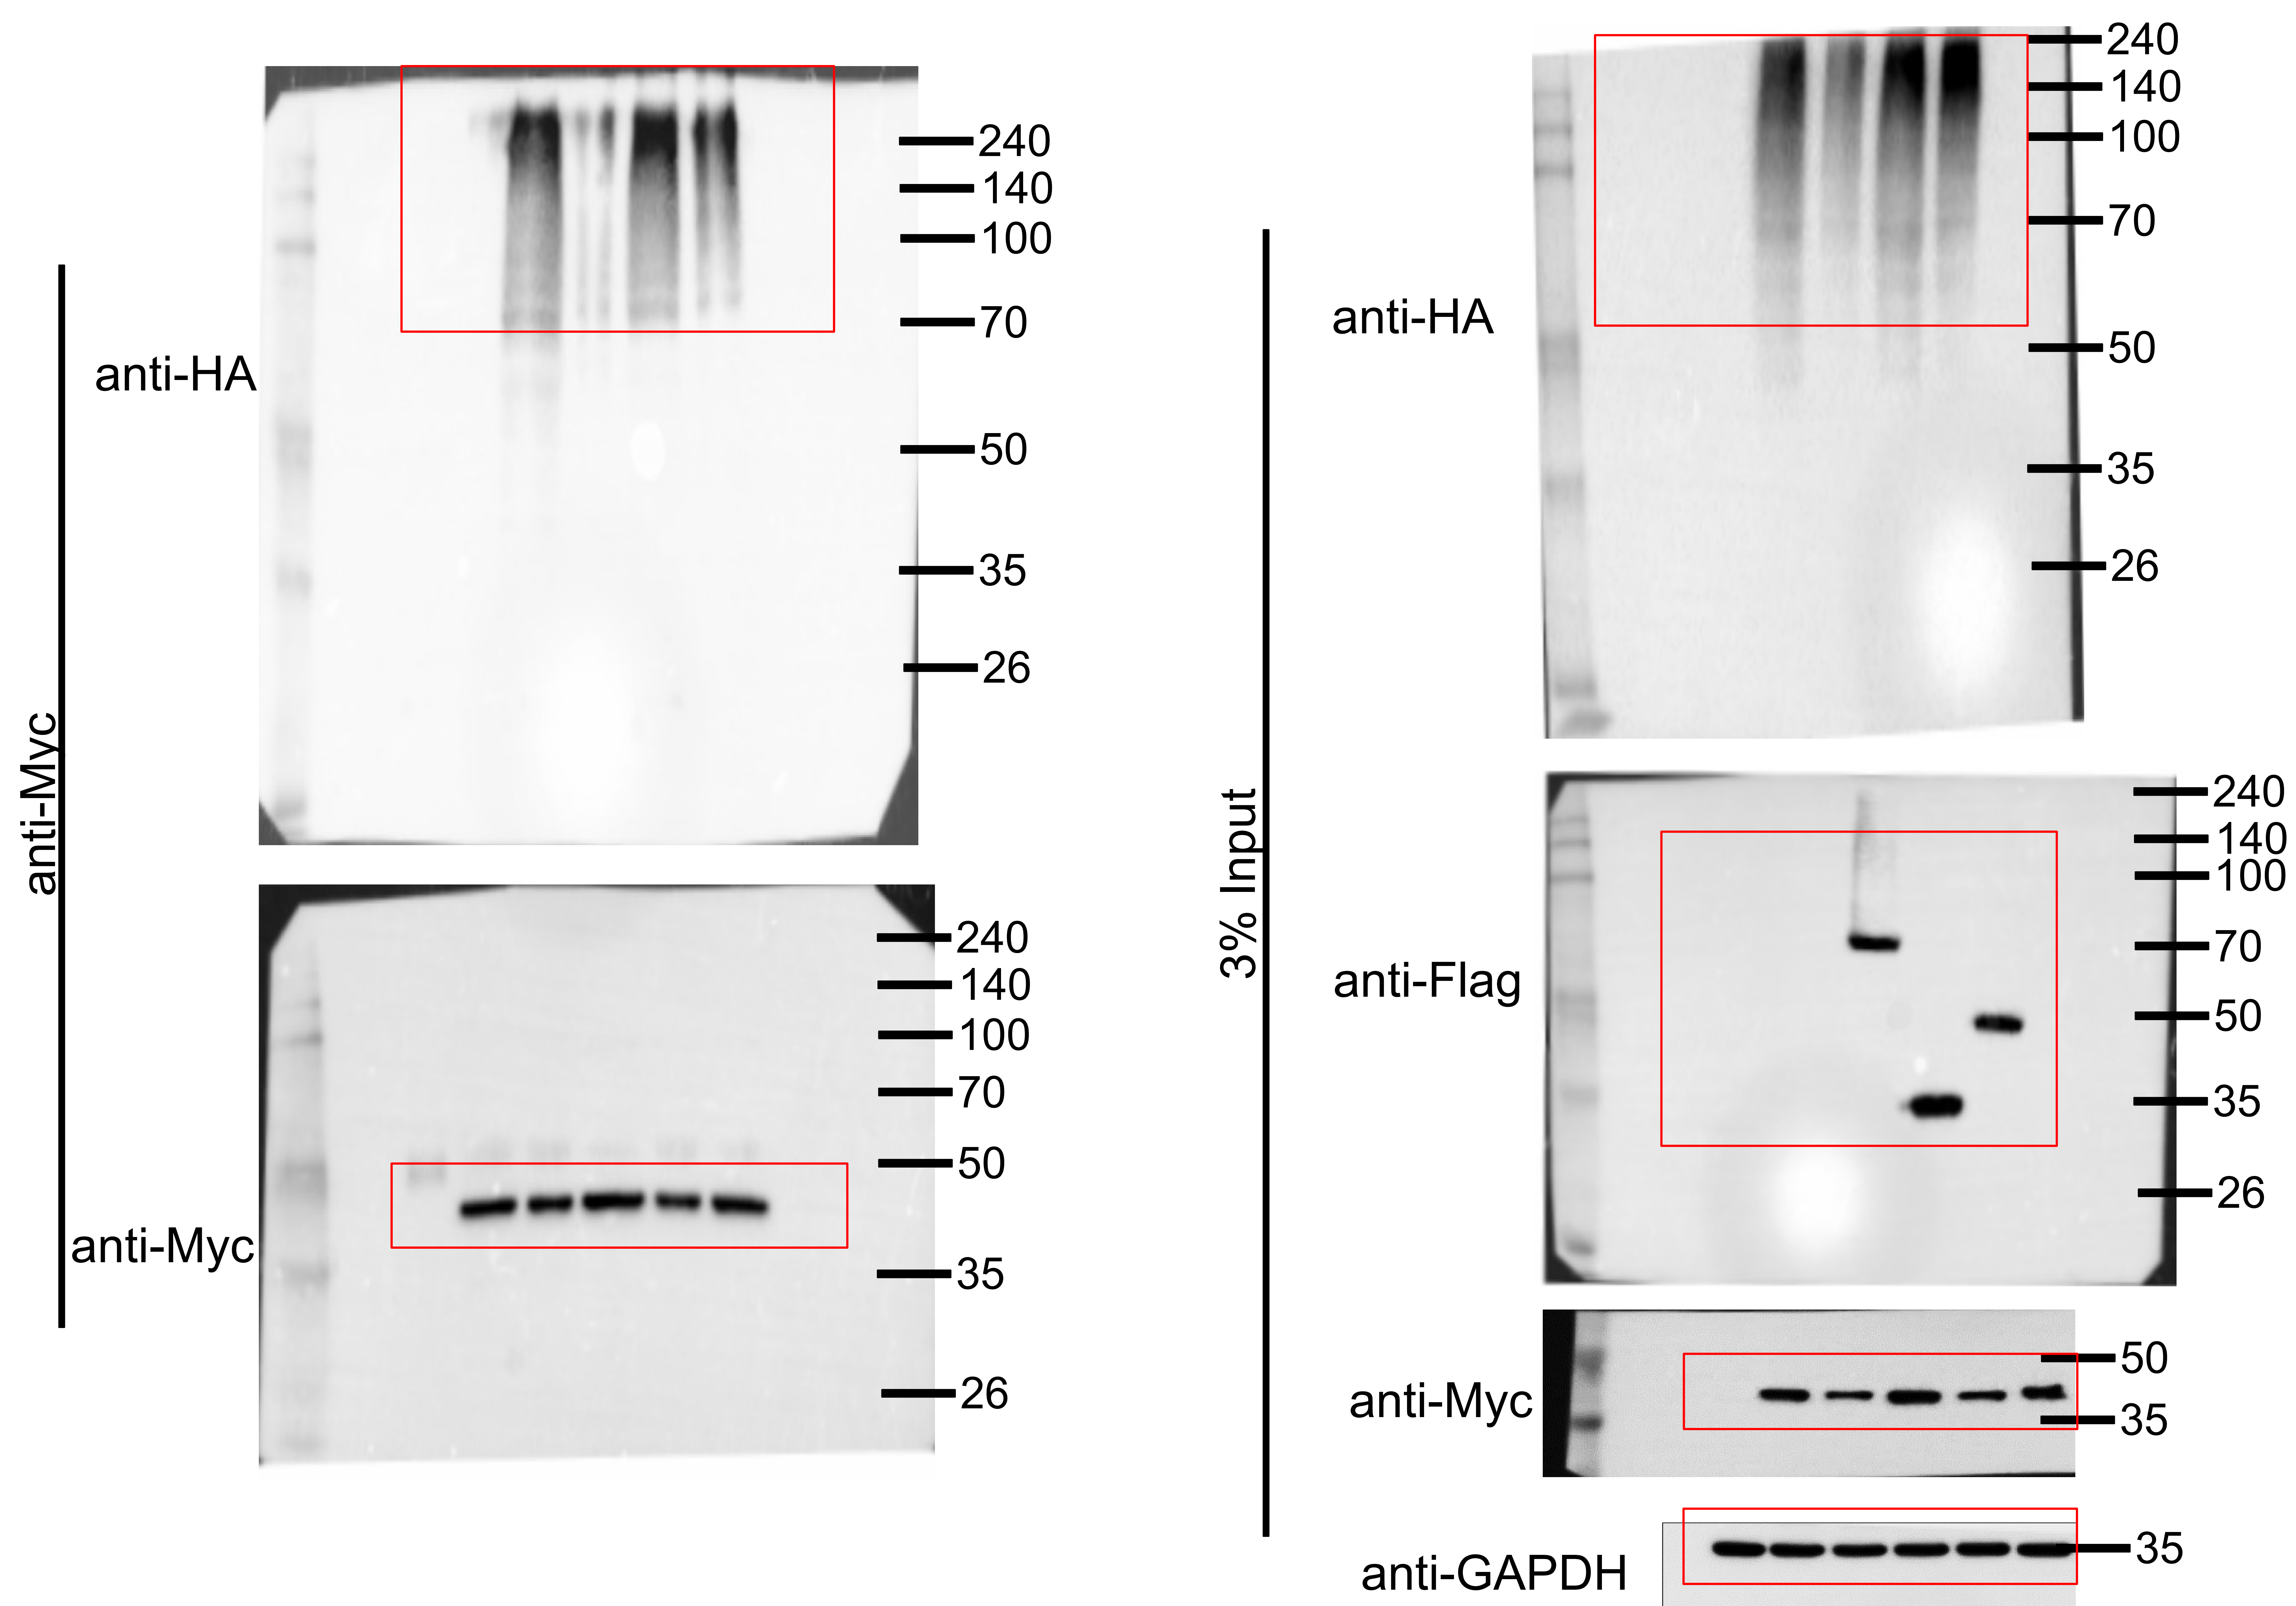



# Uncropped blots of Fig. 5

## E

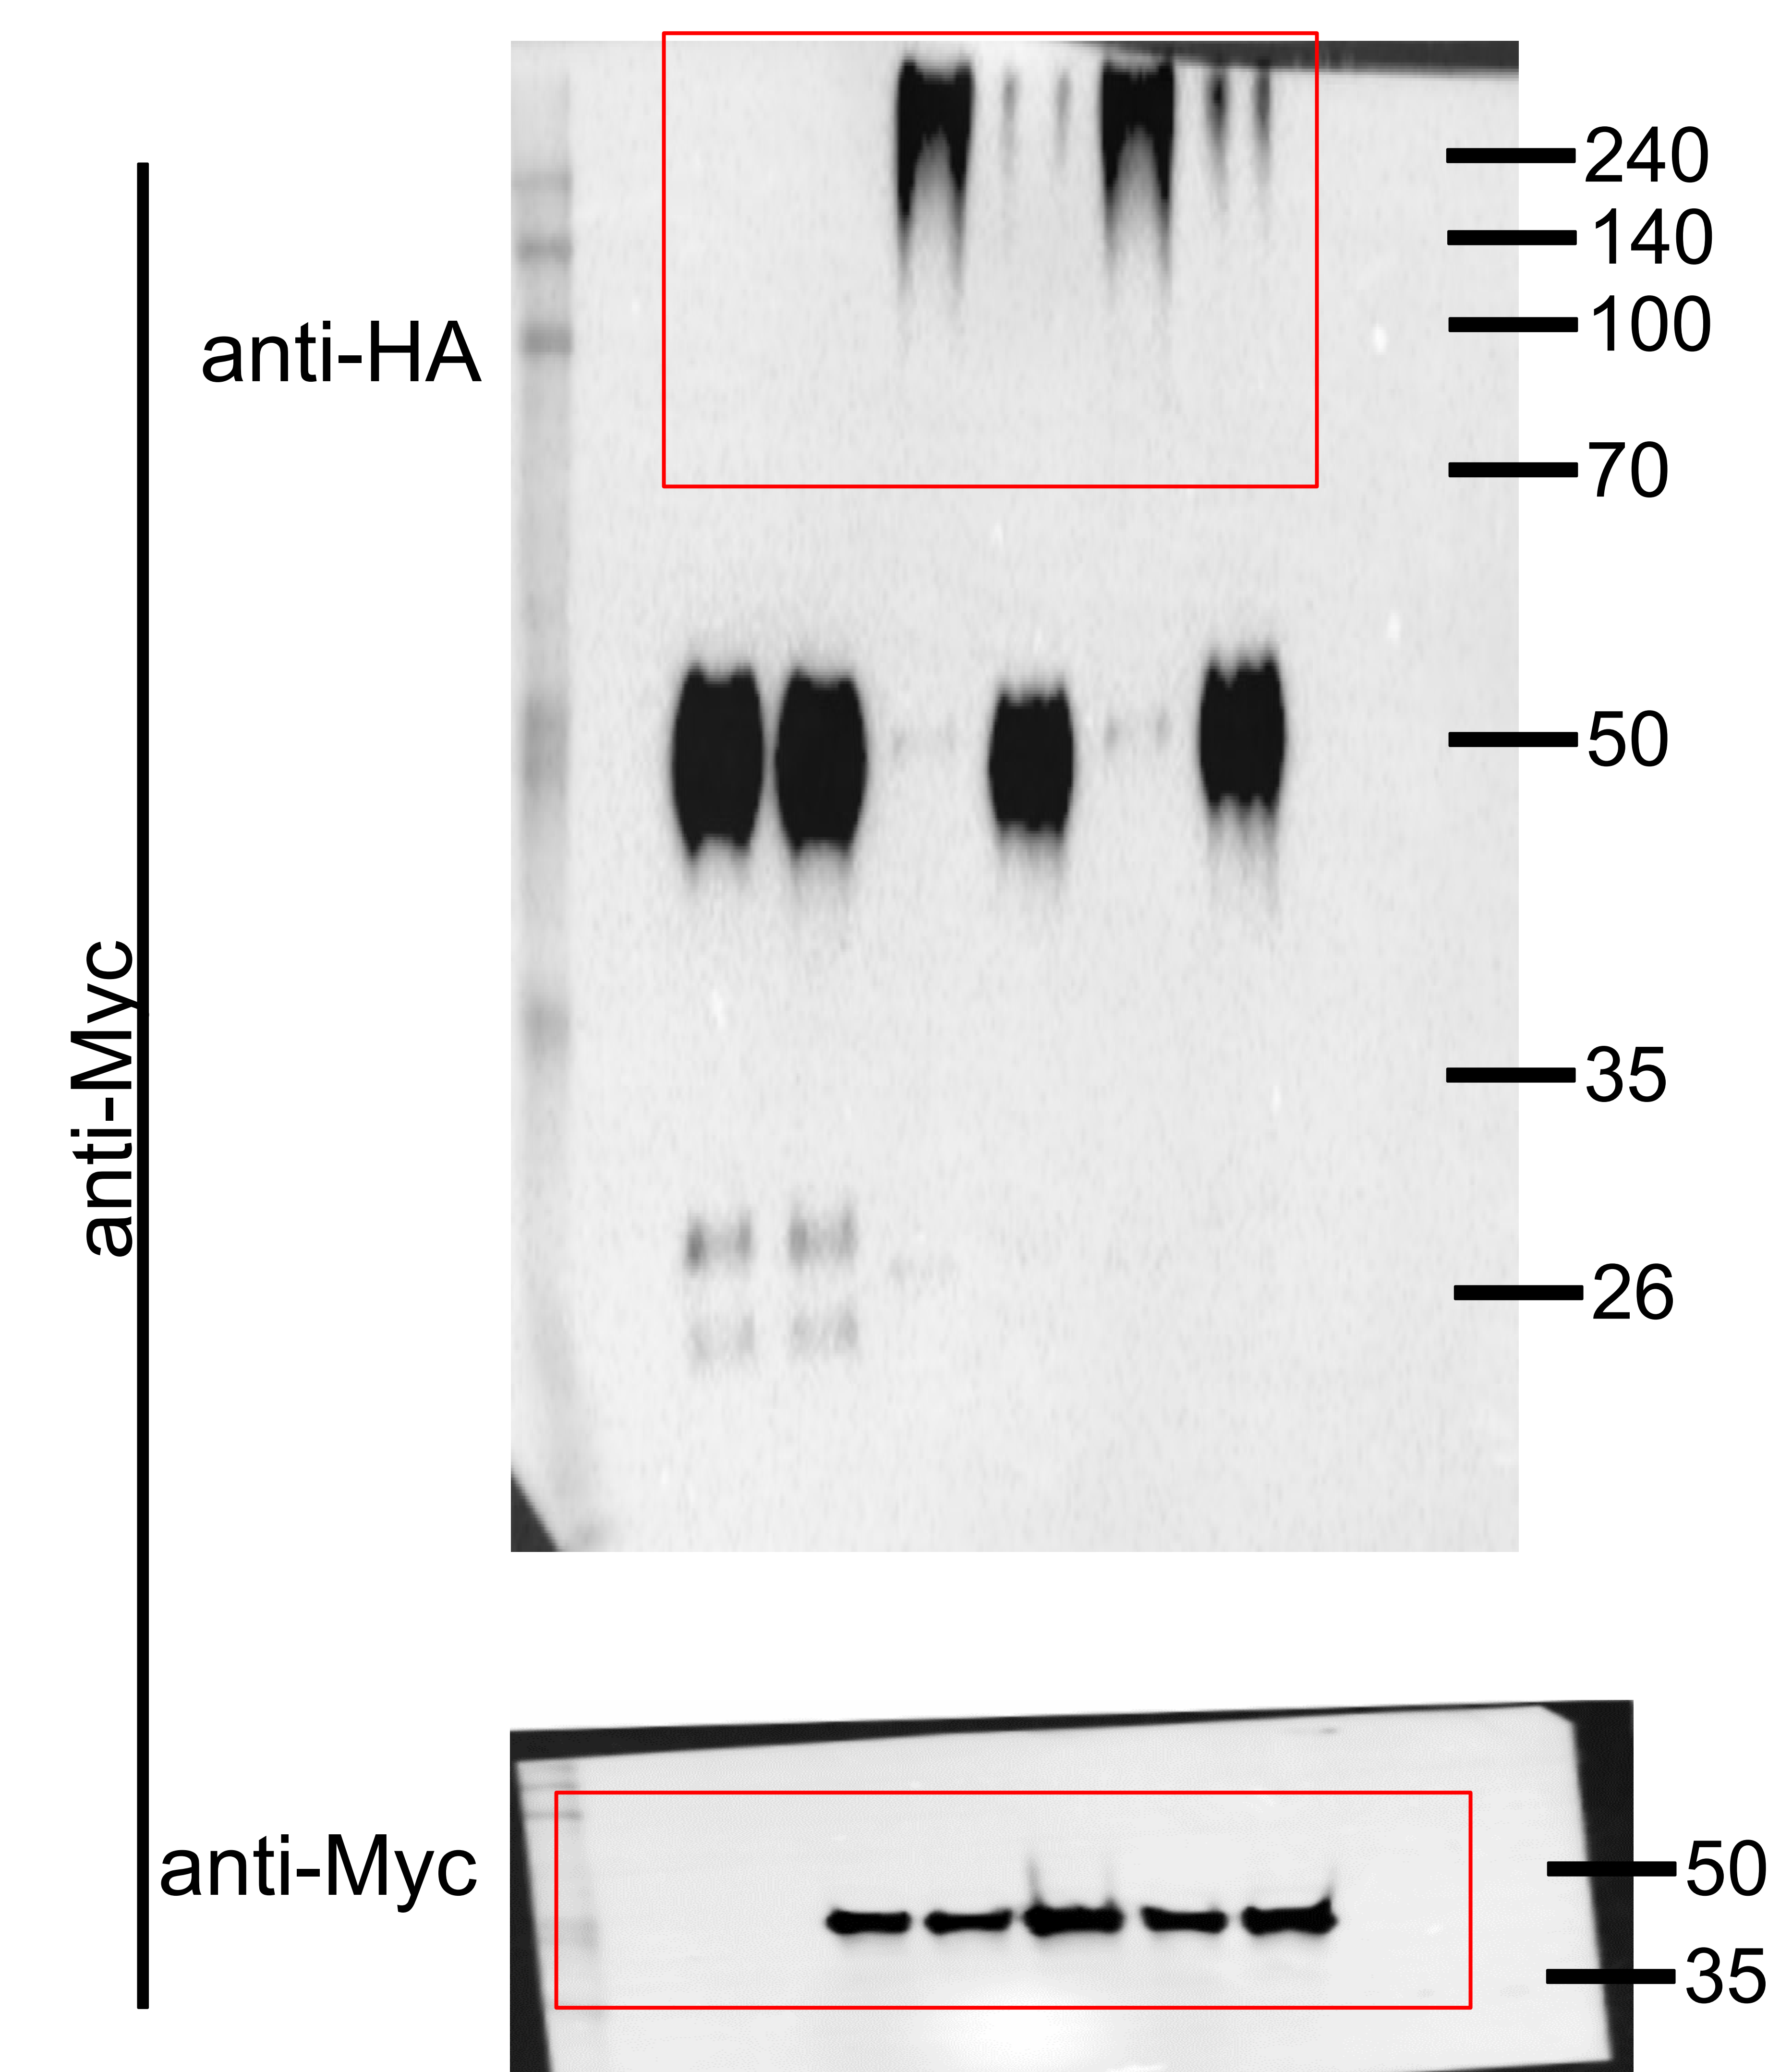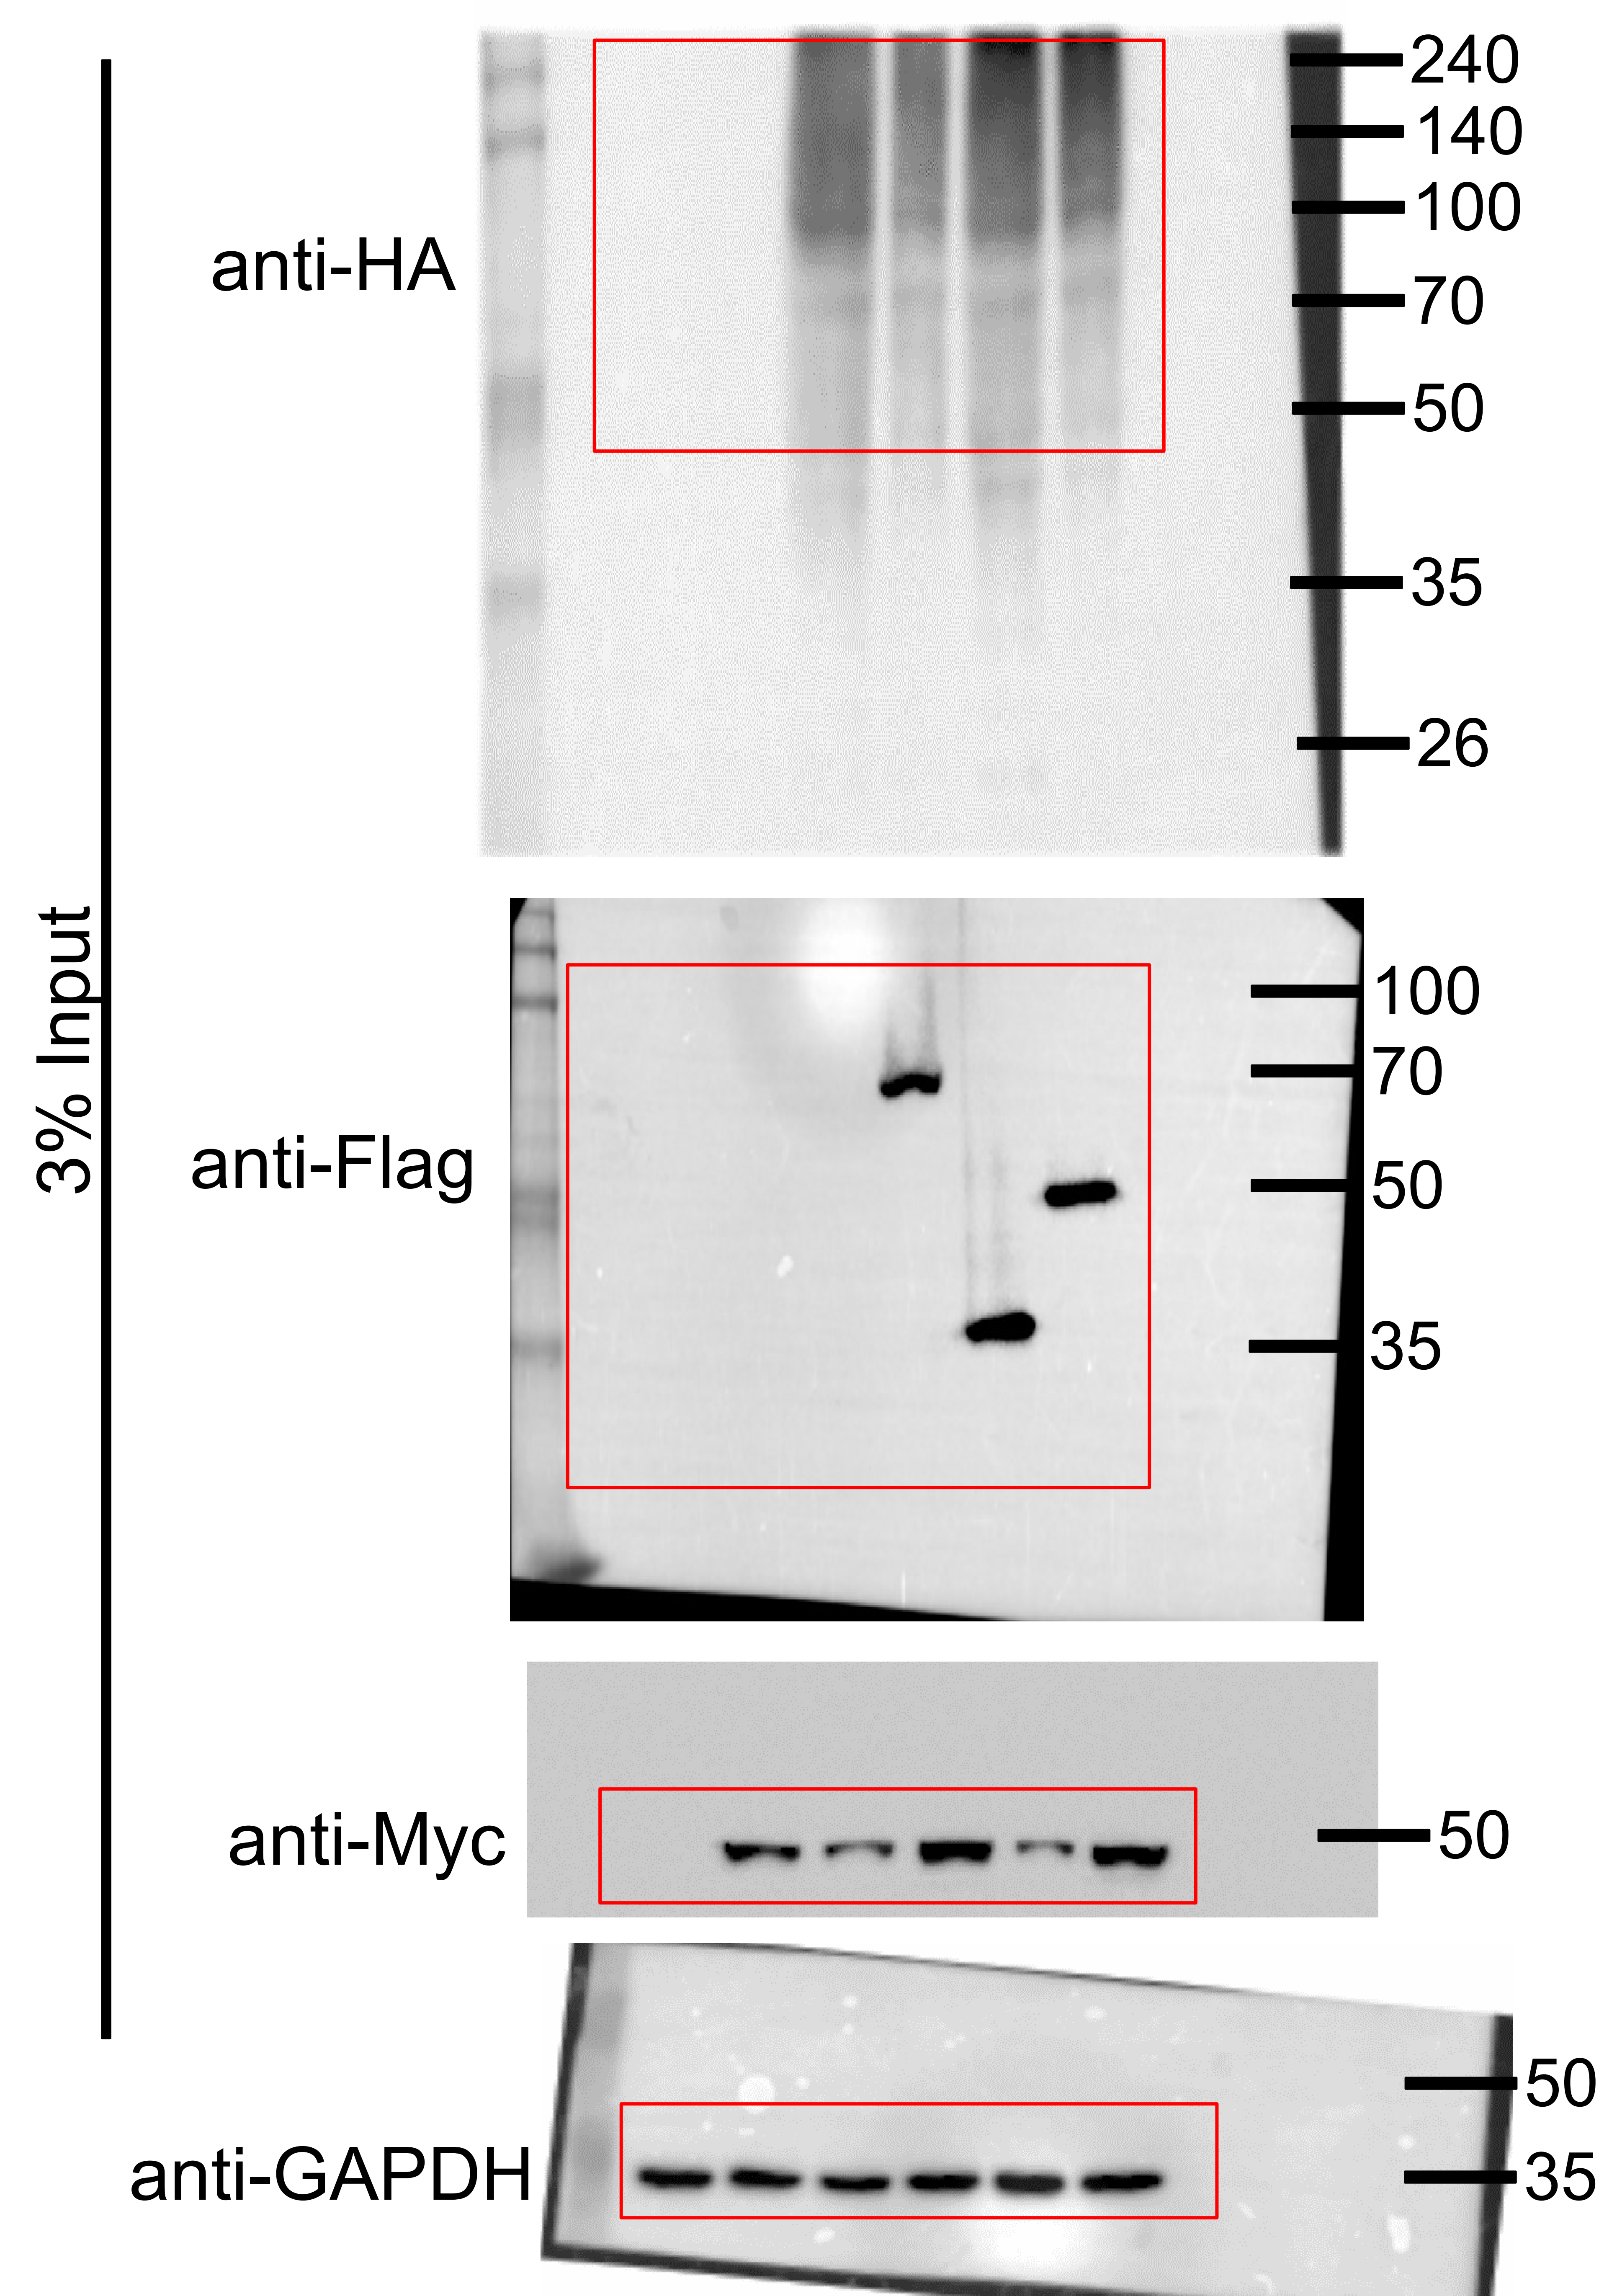

# Uncropped blots of Fig. 6

## A

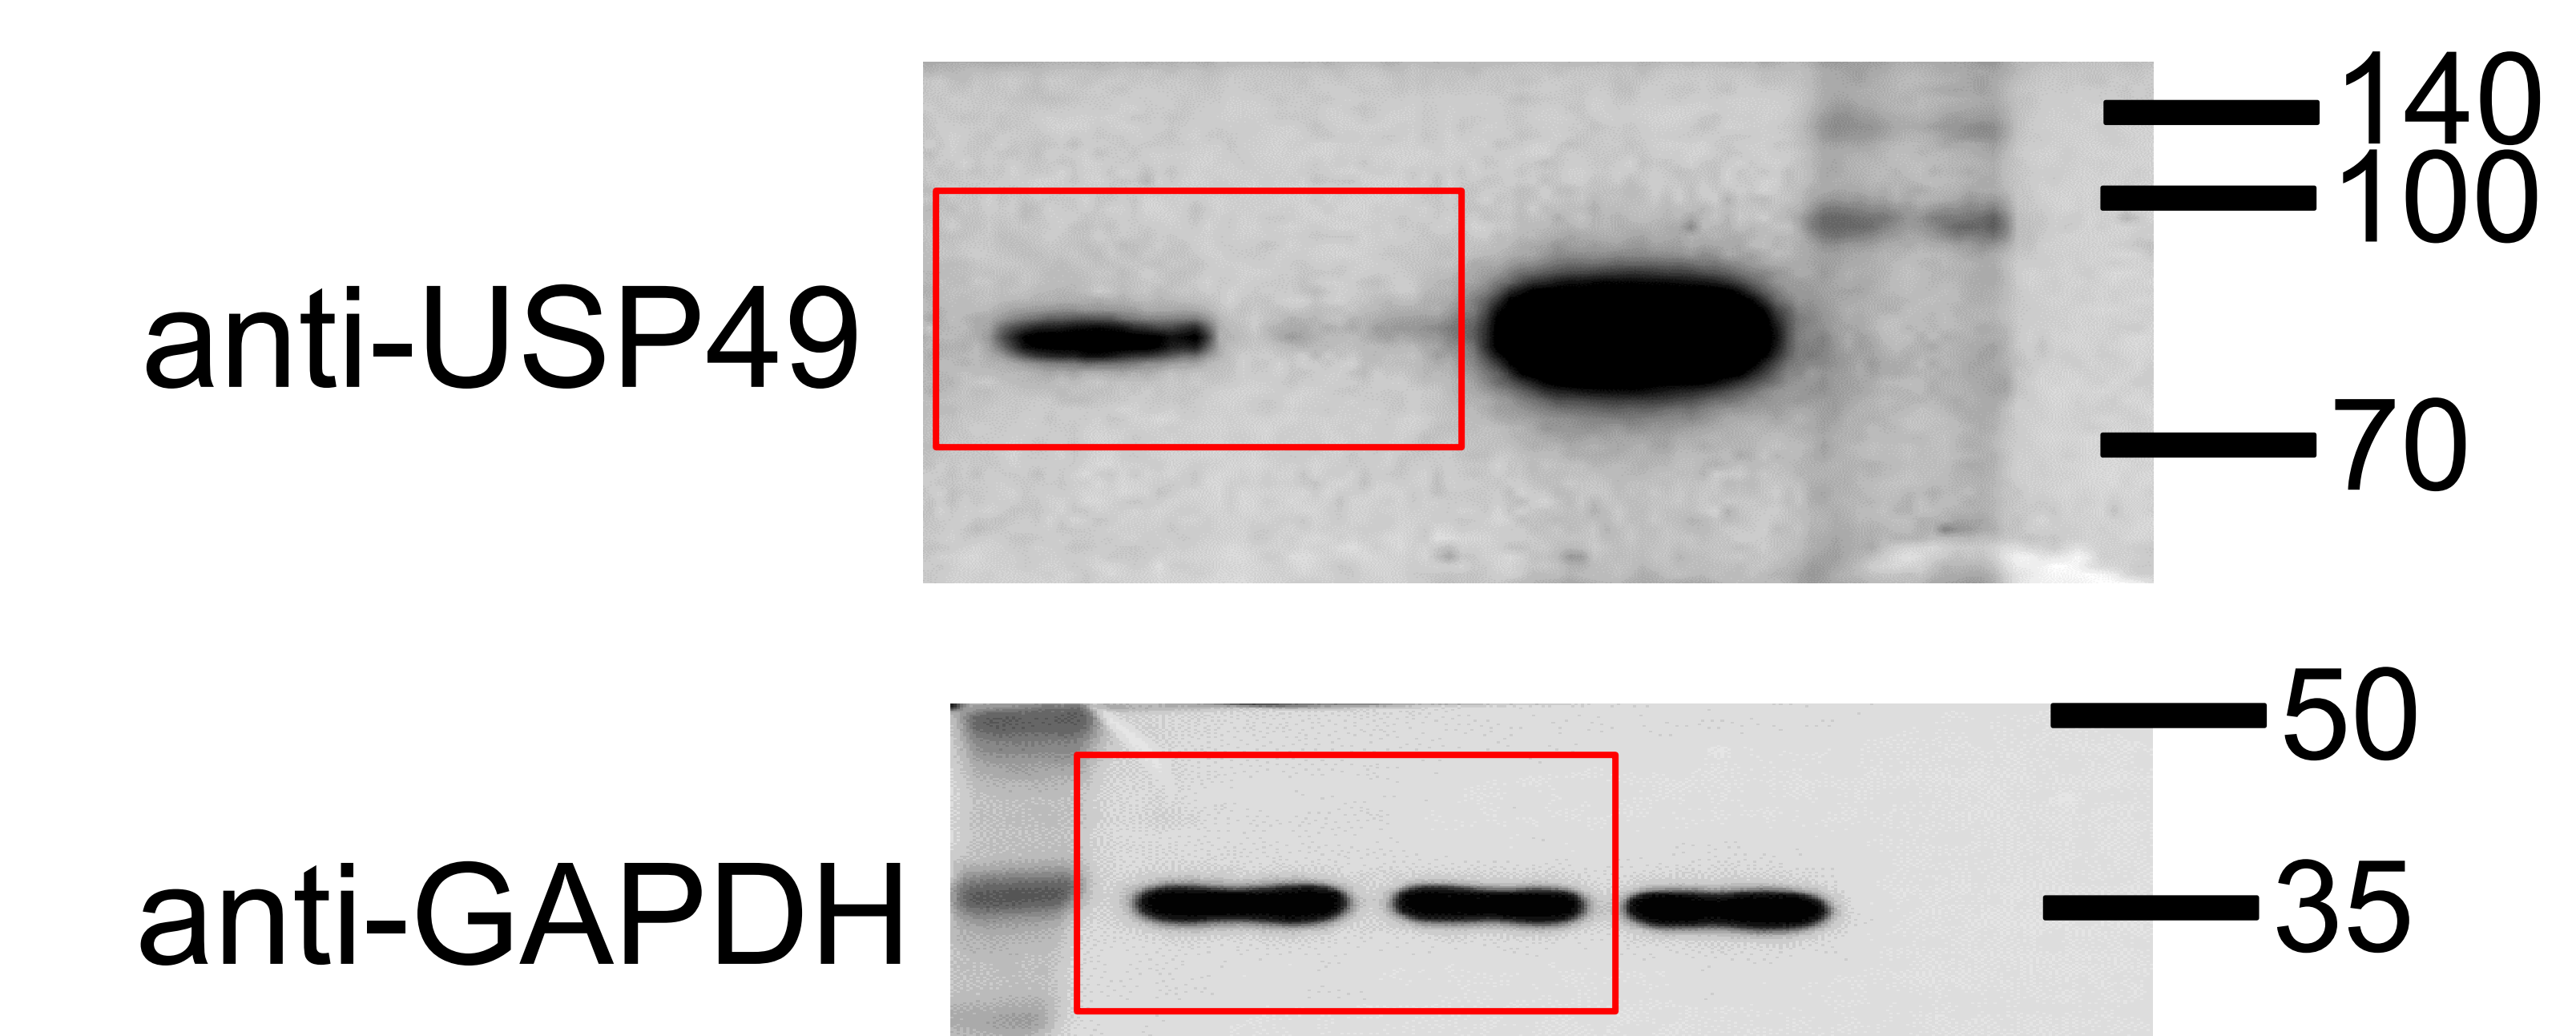

## I

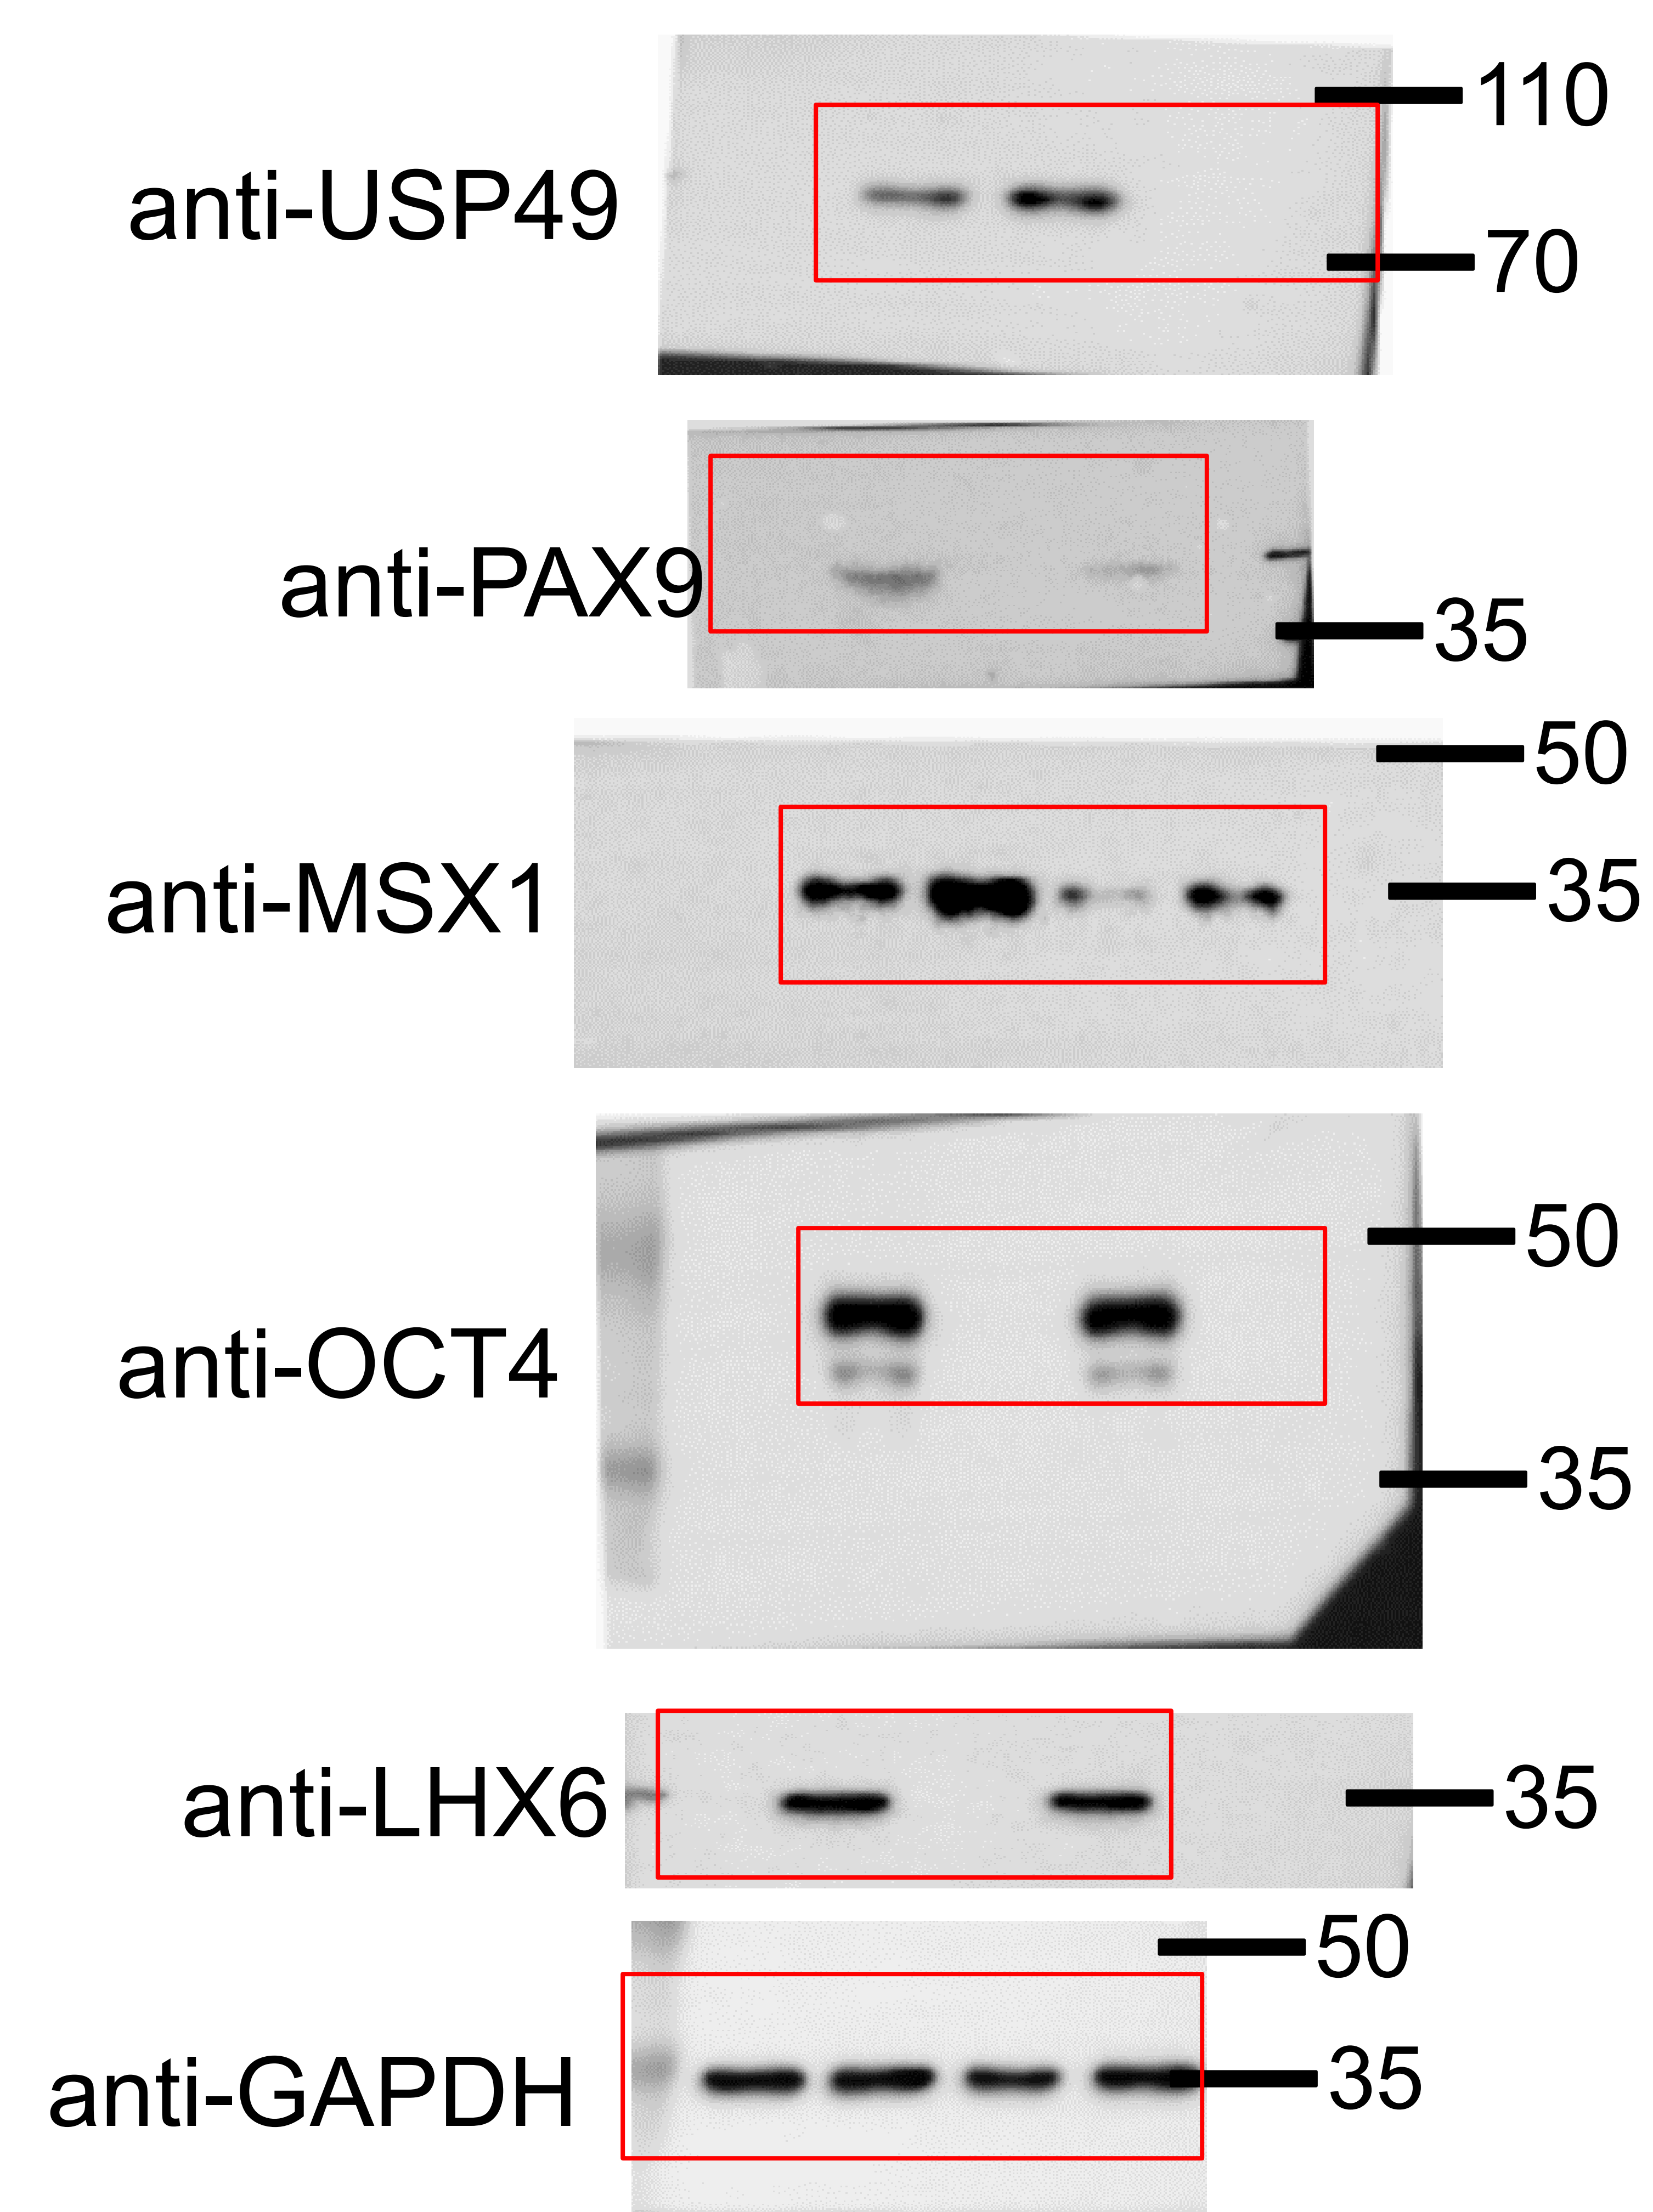

# Uncropped blots of Supplementary Fig. S2

## A

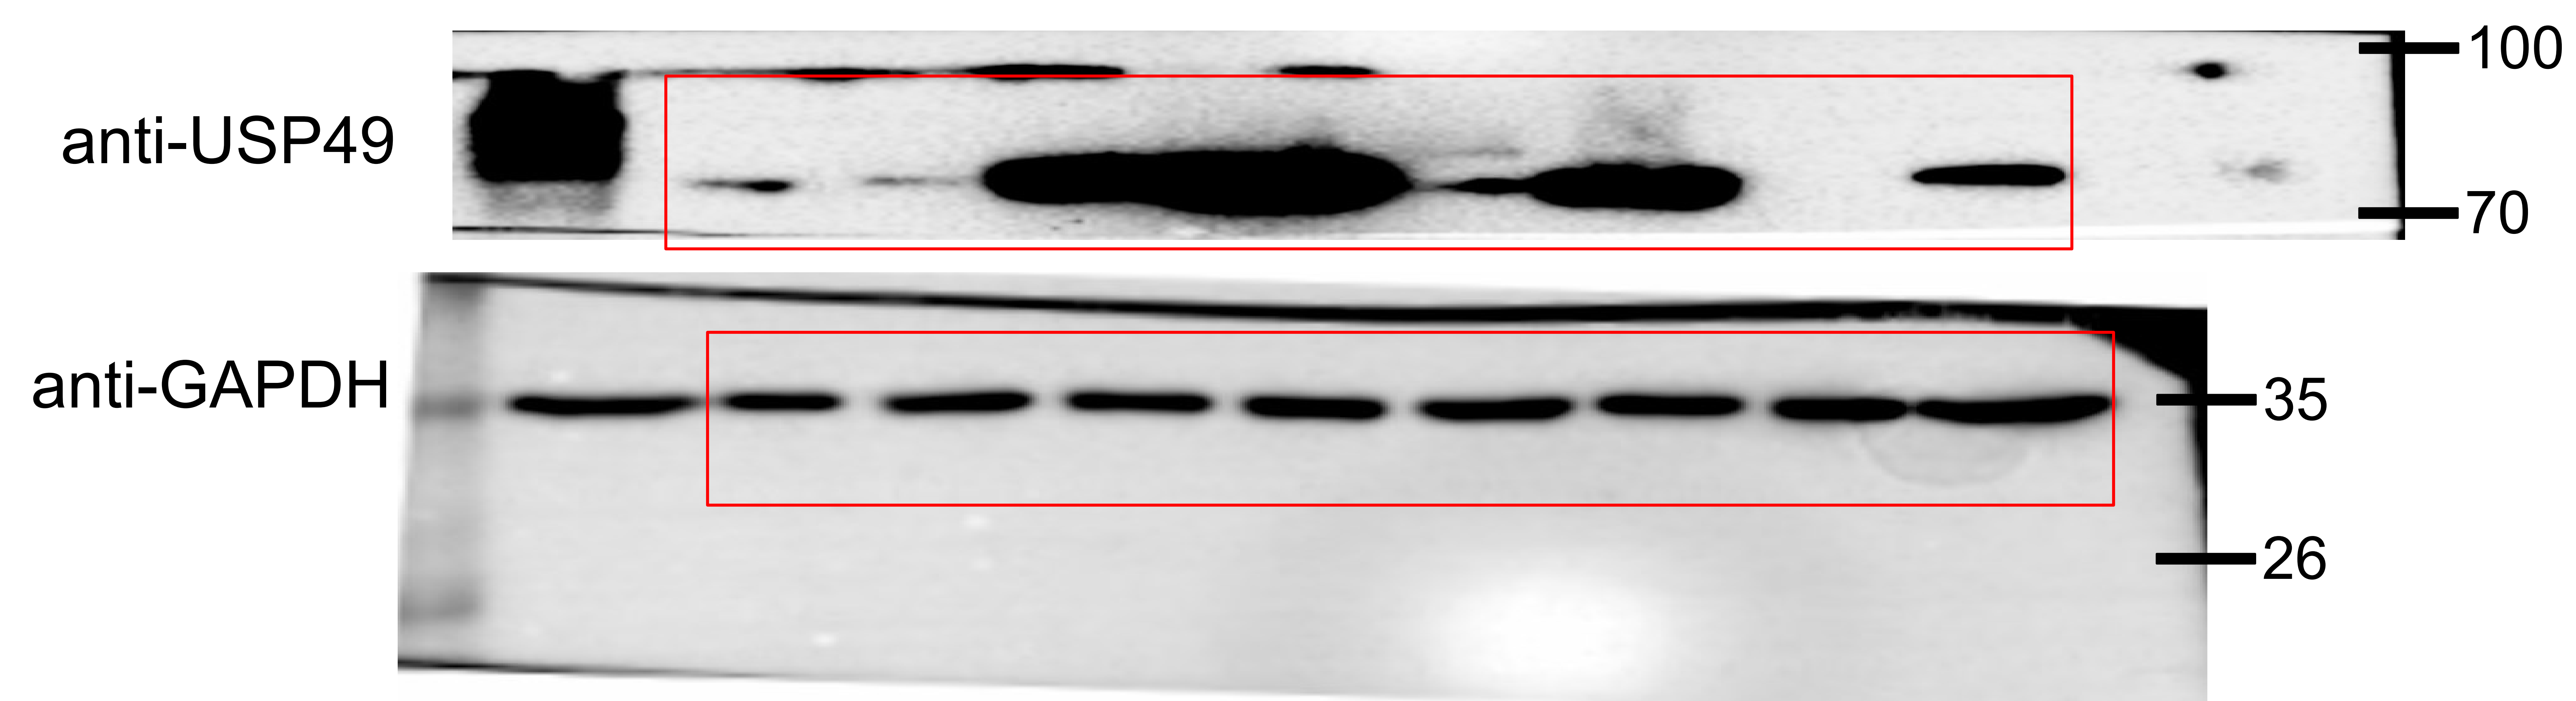

## B

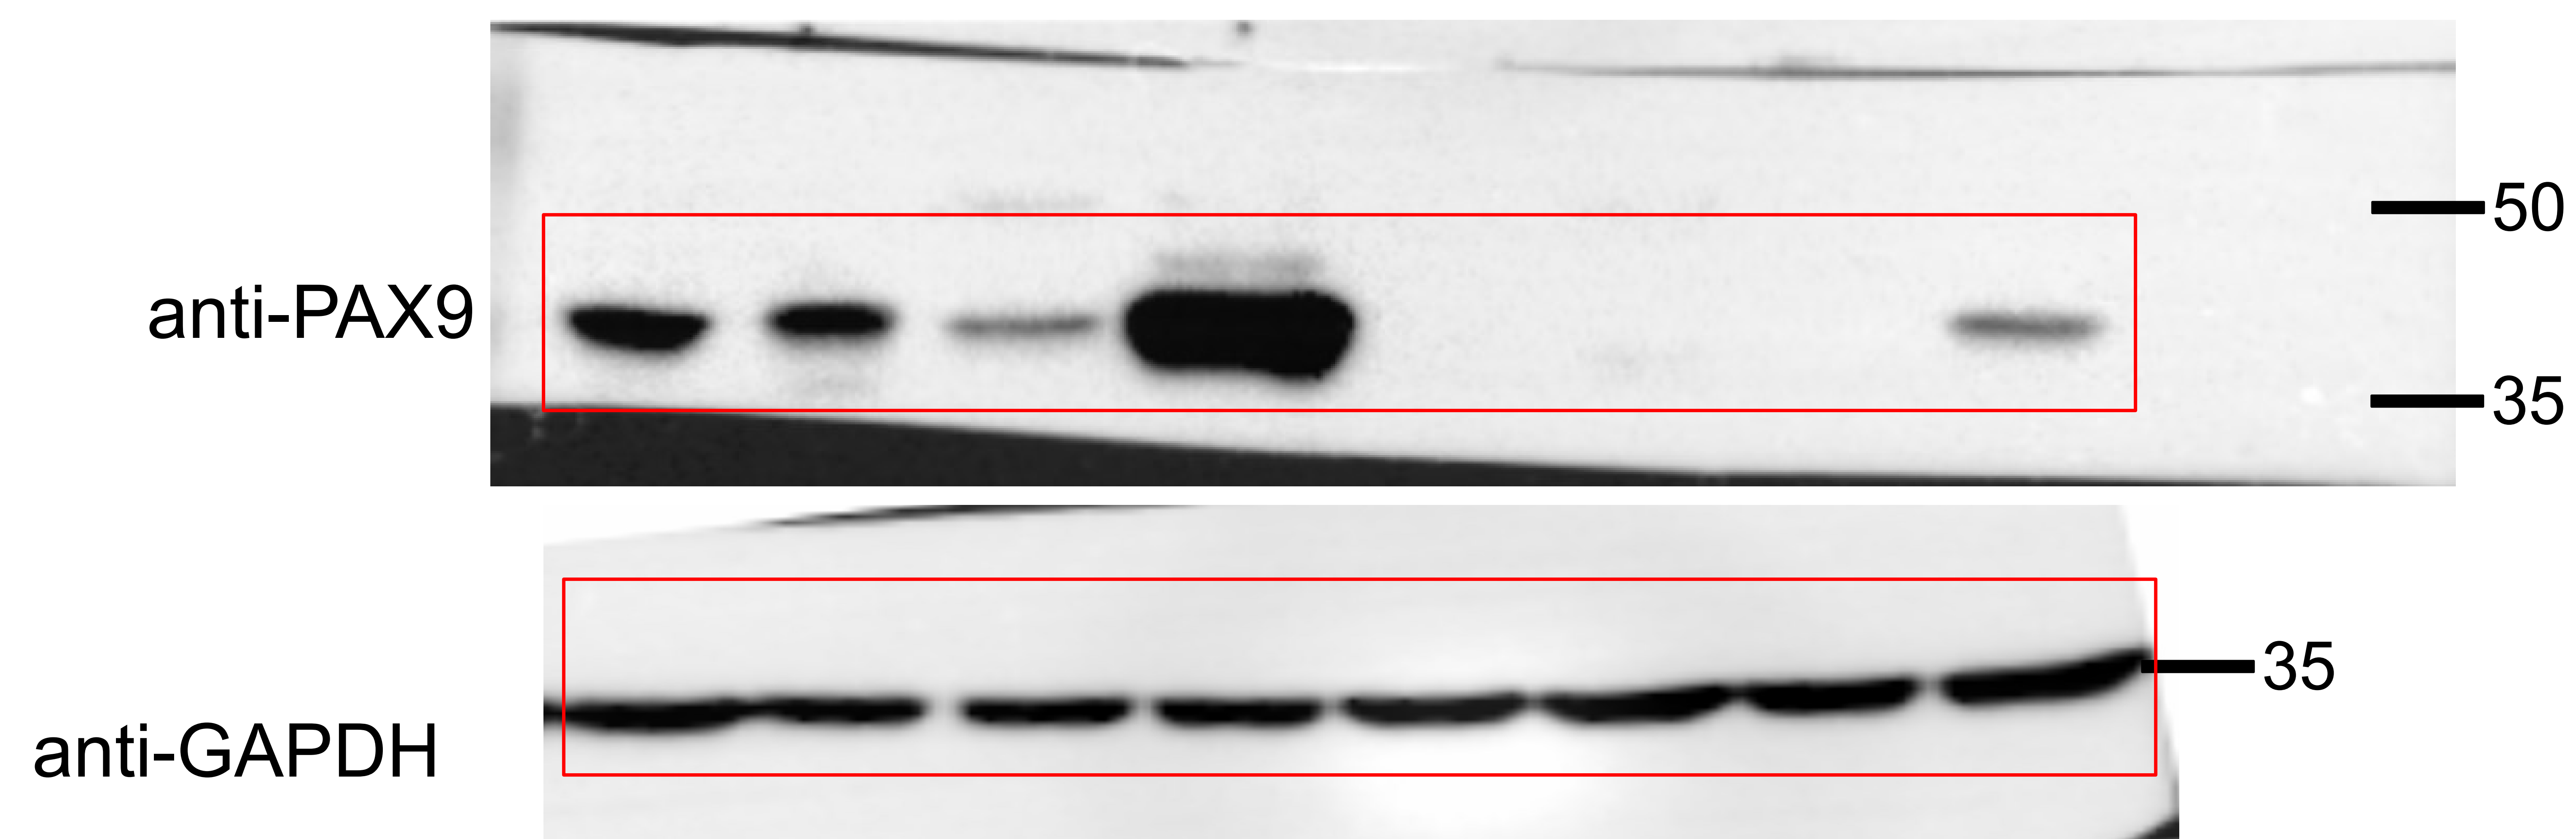

## C

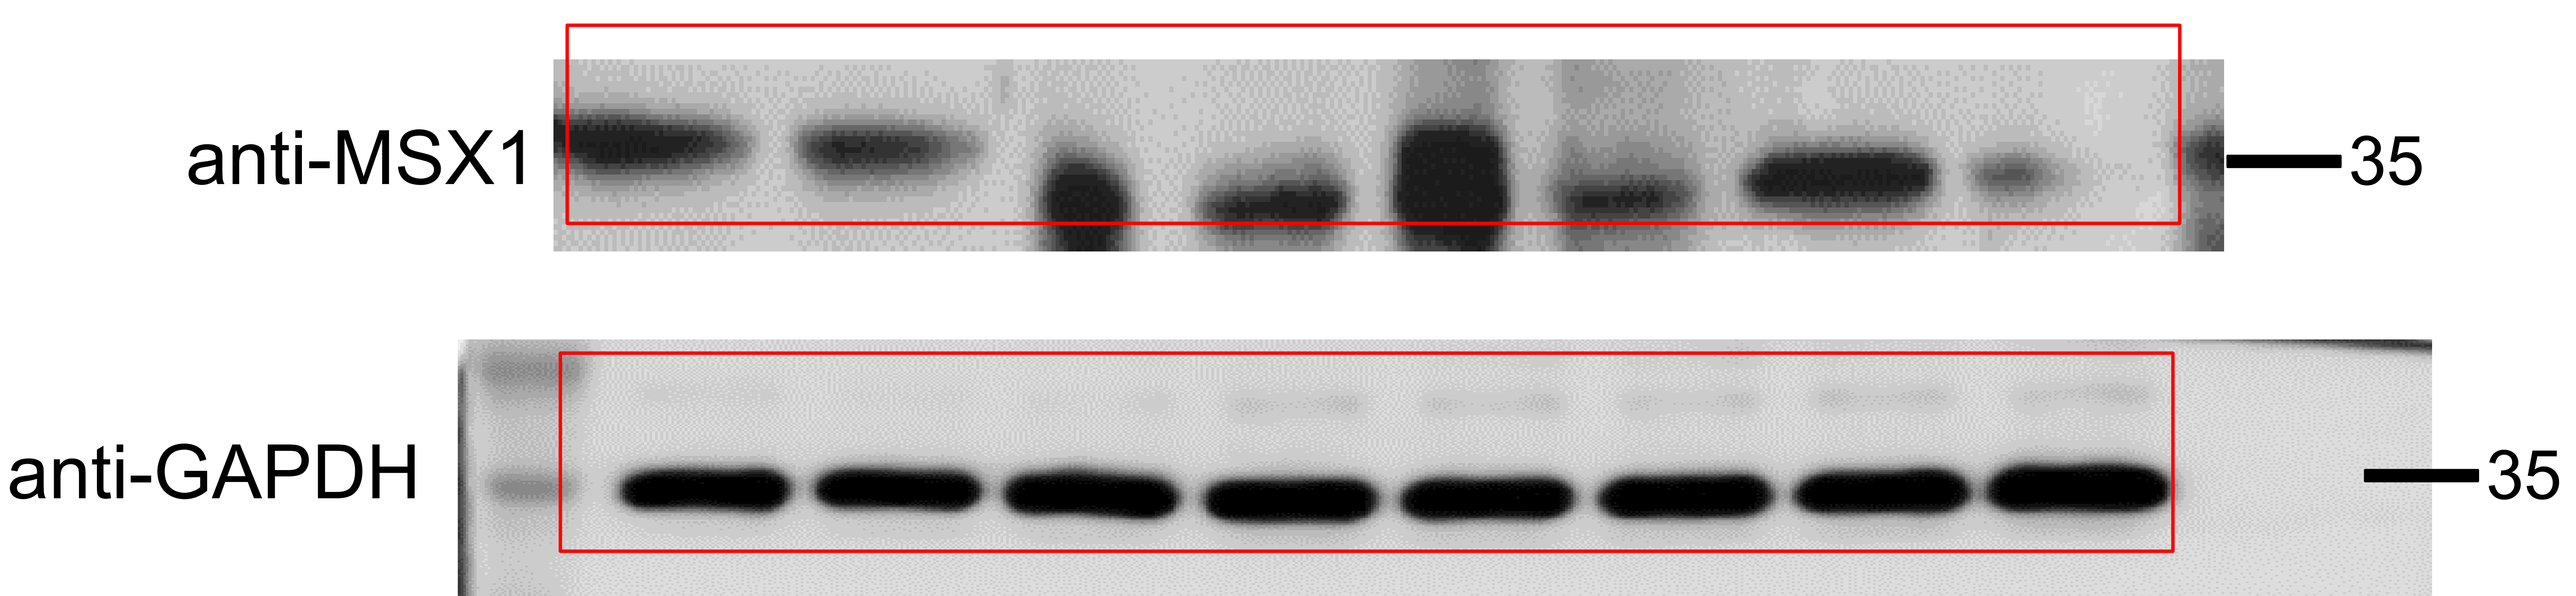

# Uncropped blots of Supplementary Fig. S3

**A**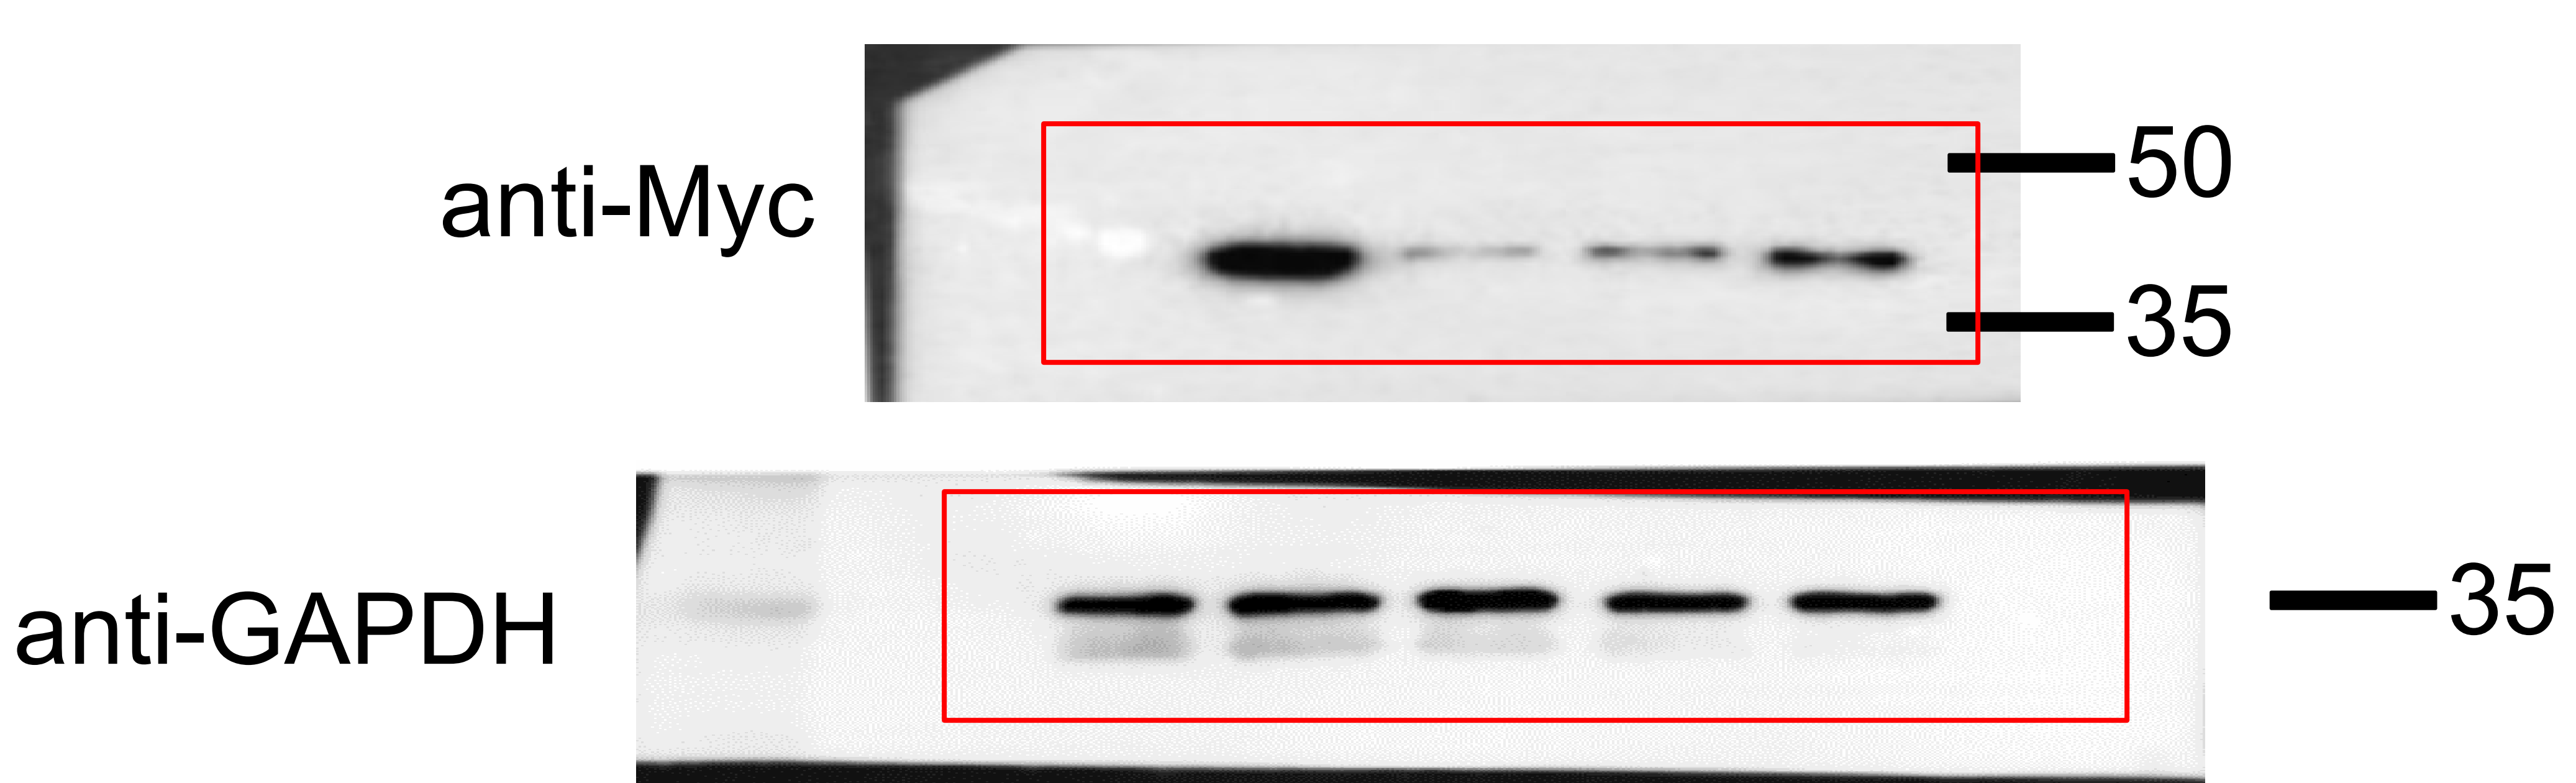**B**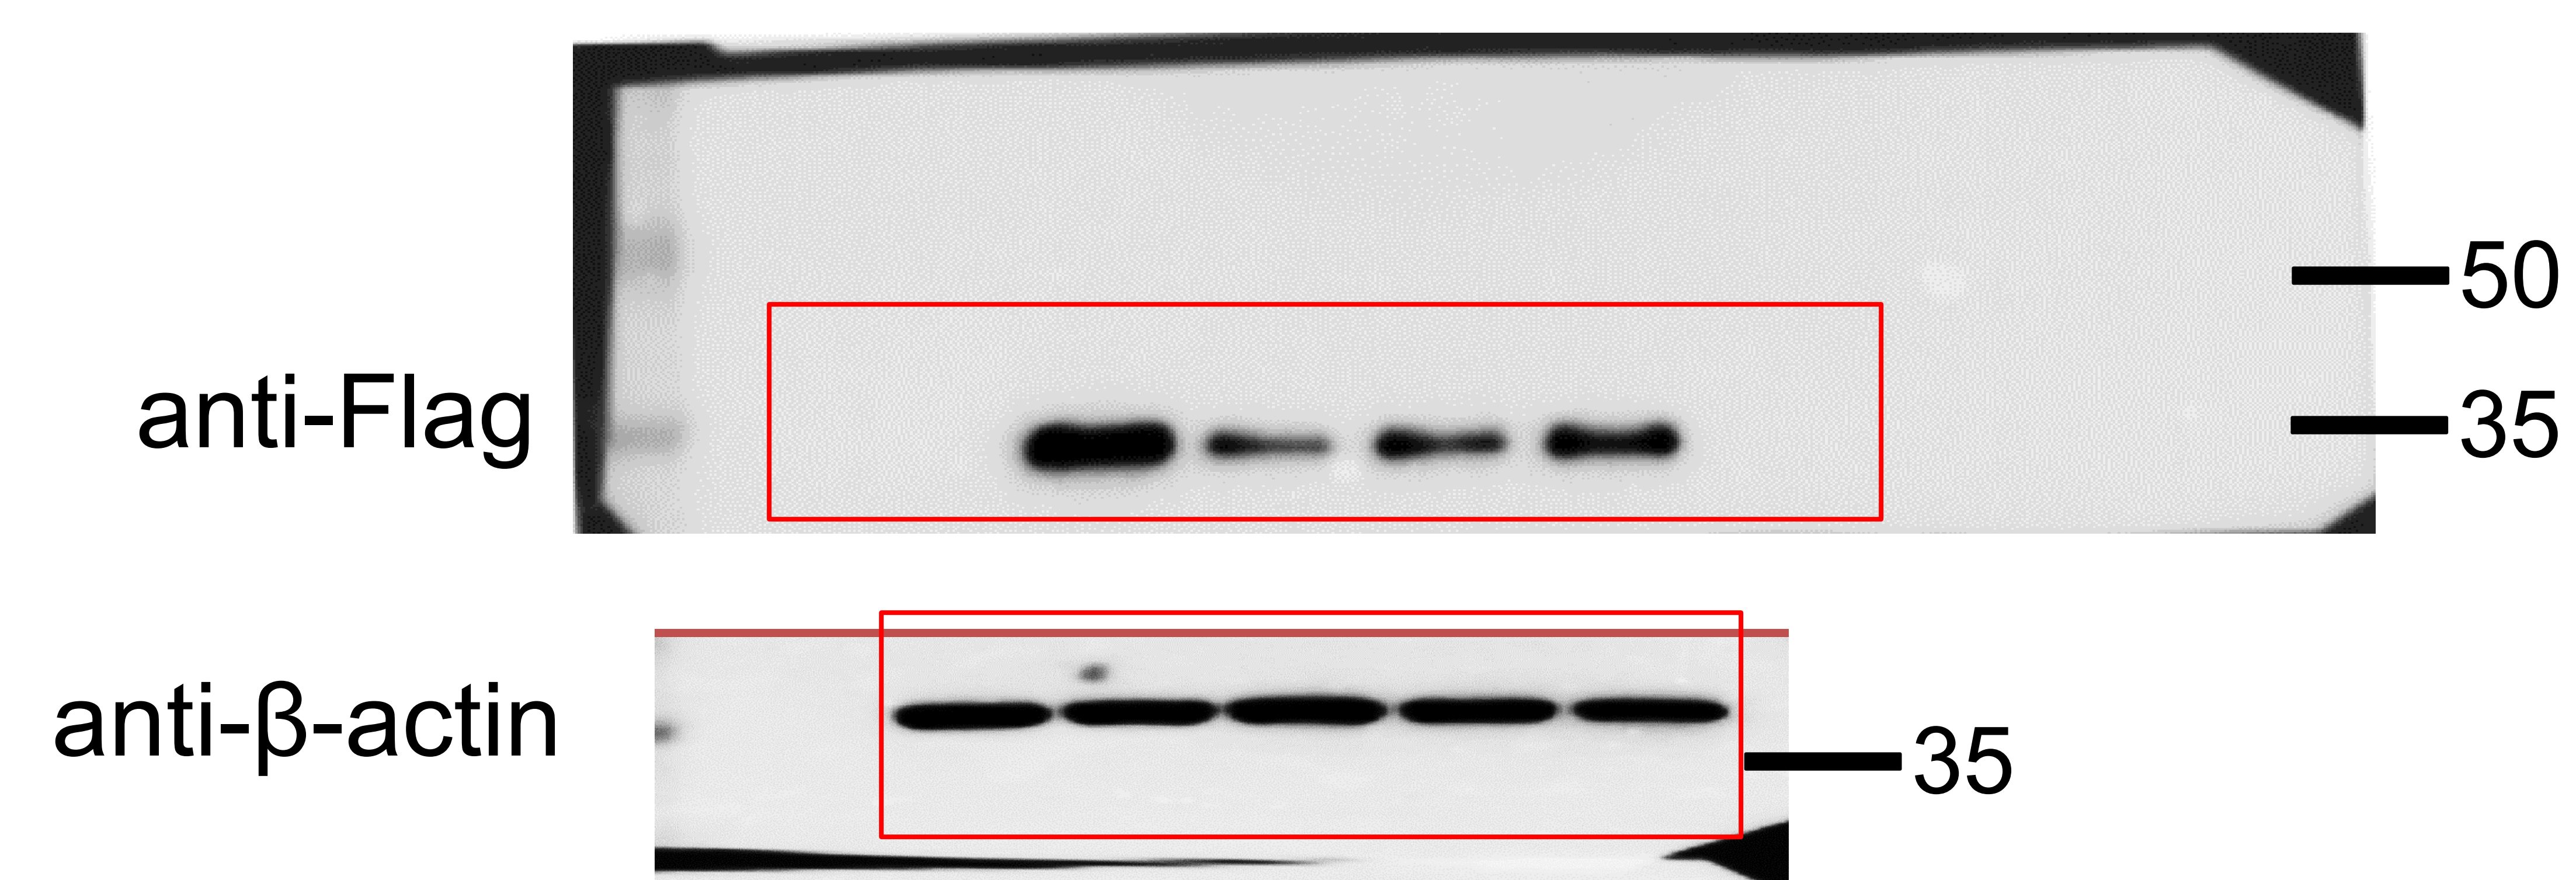**C**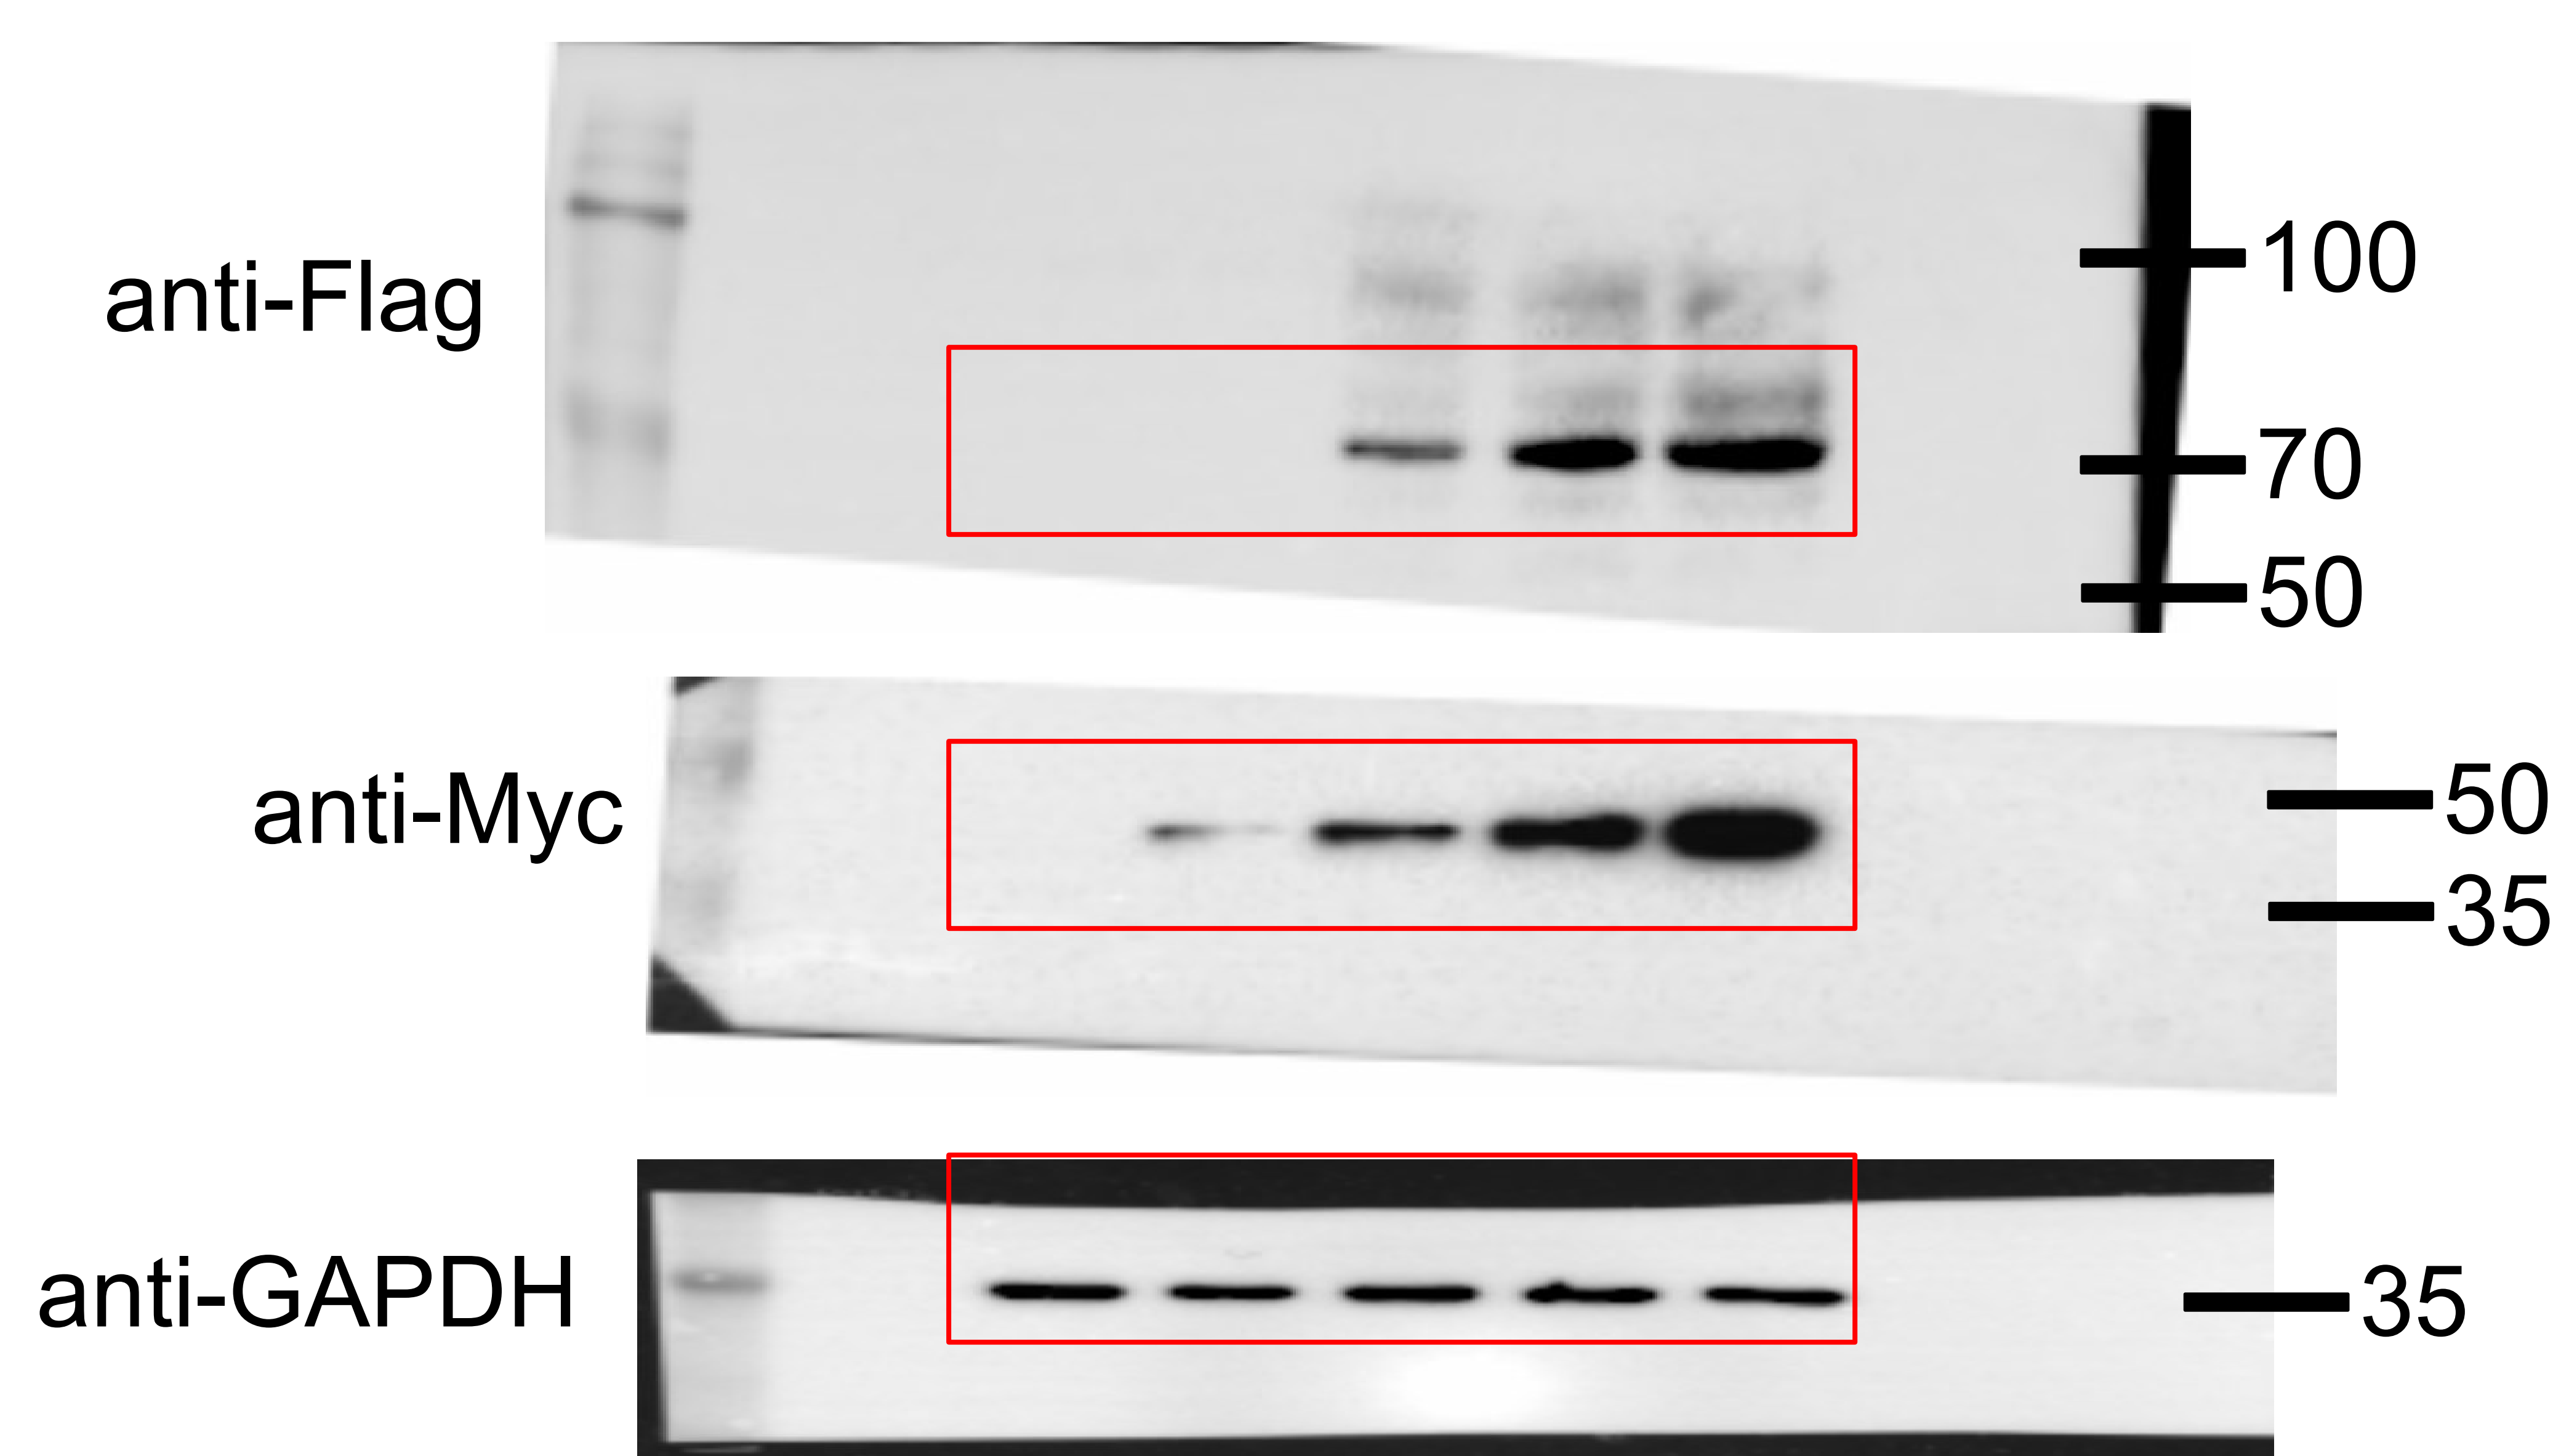**D**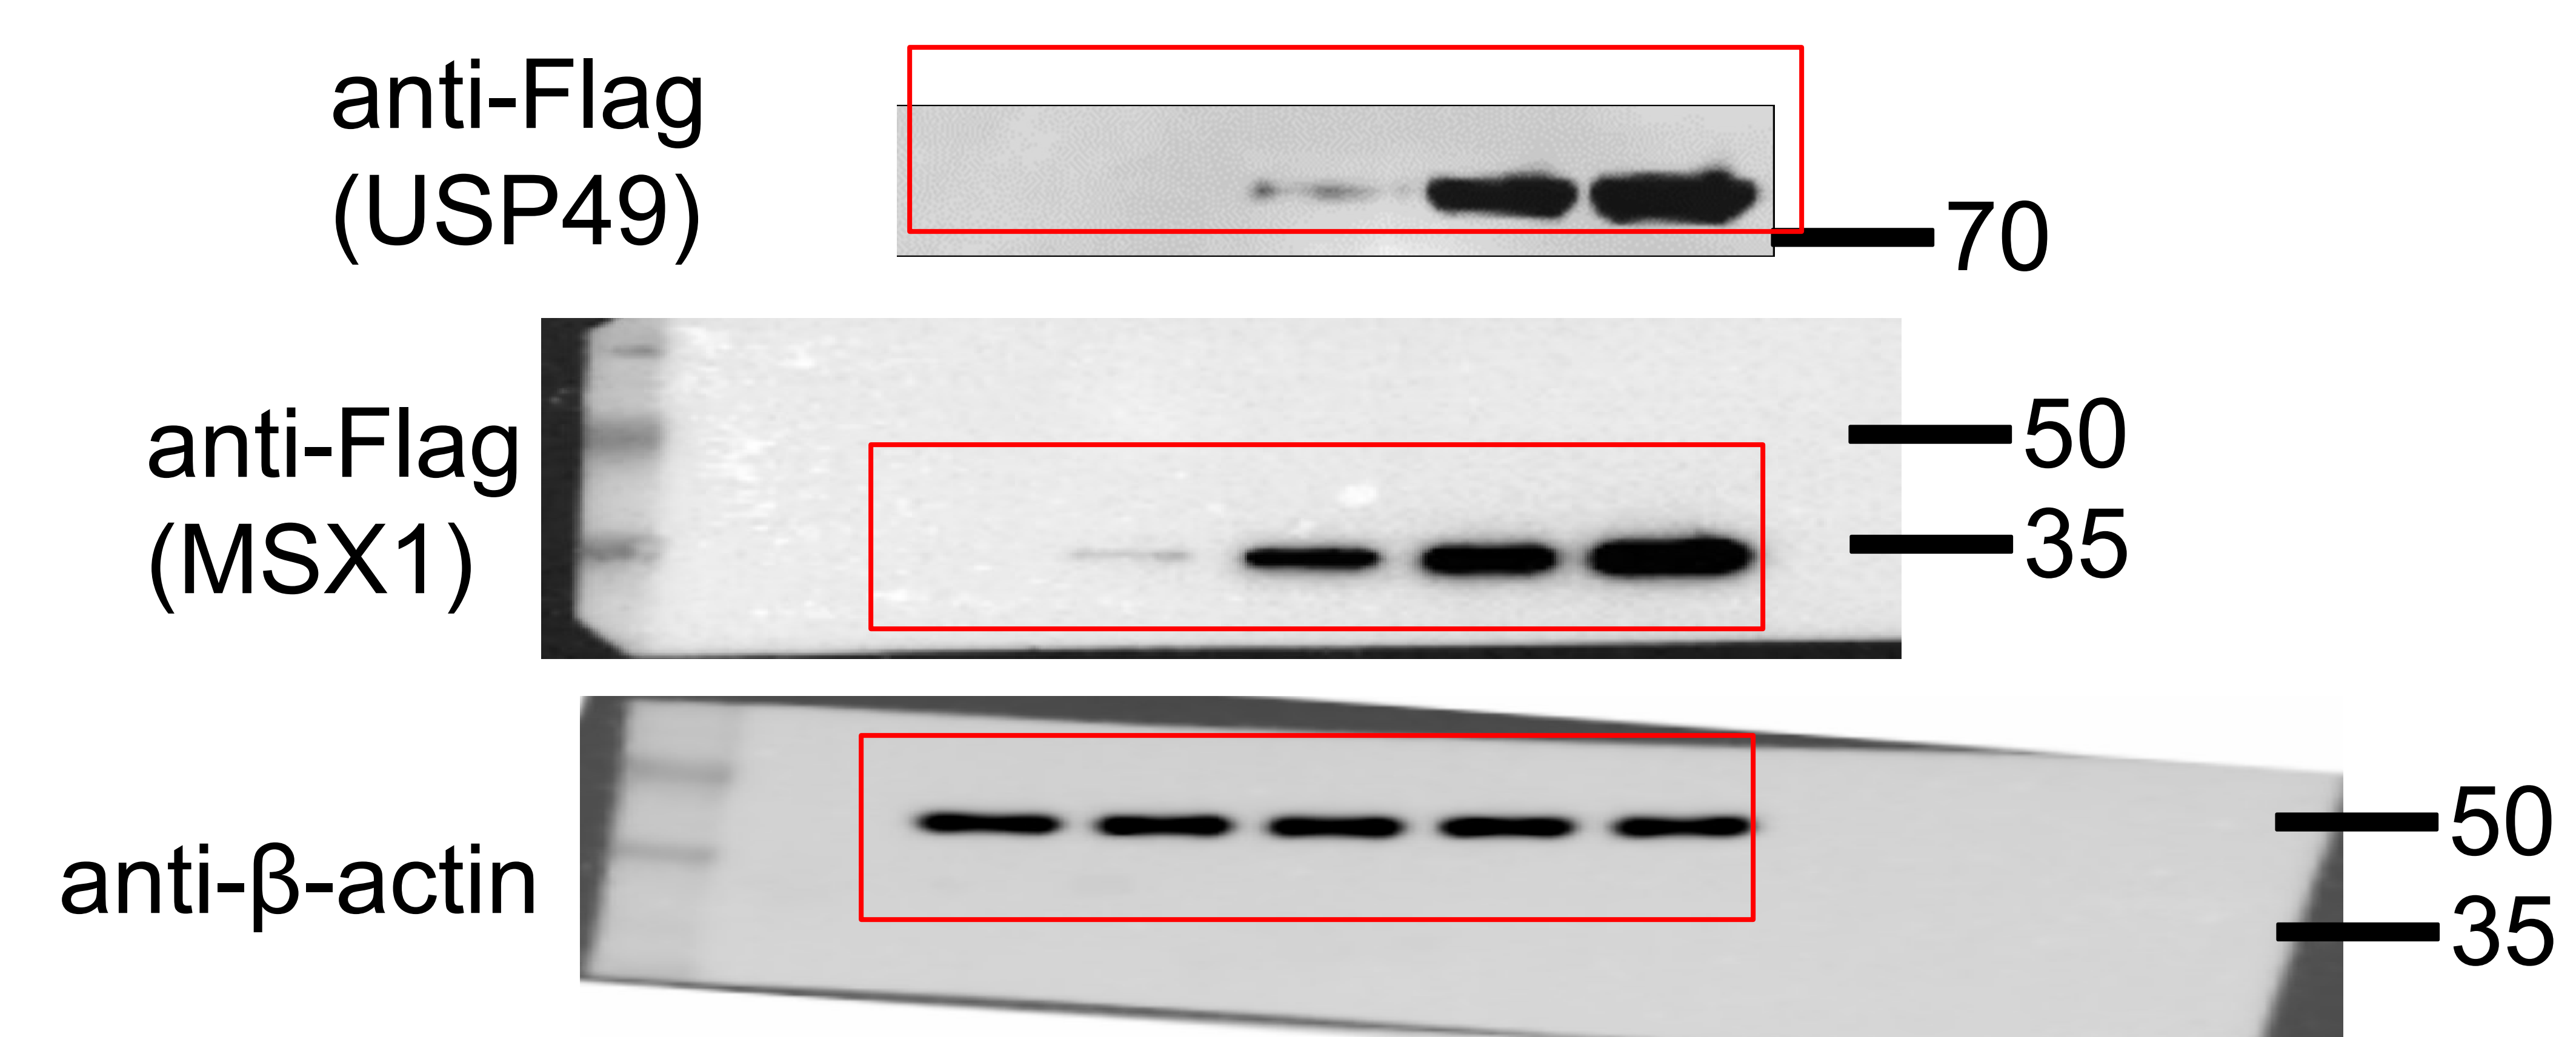**E**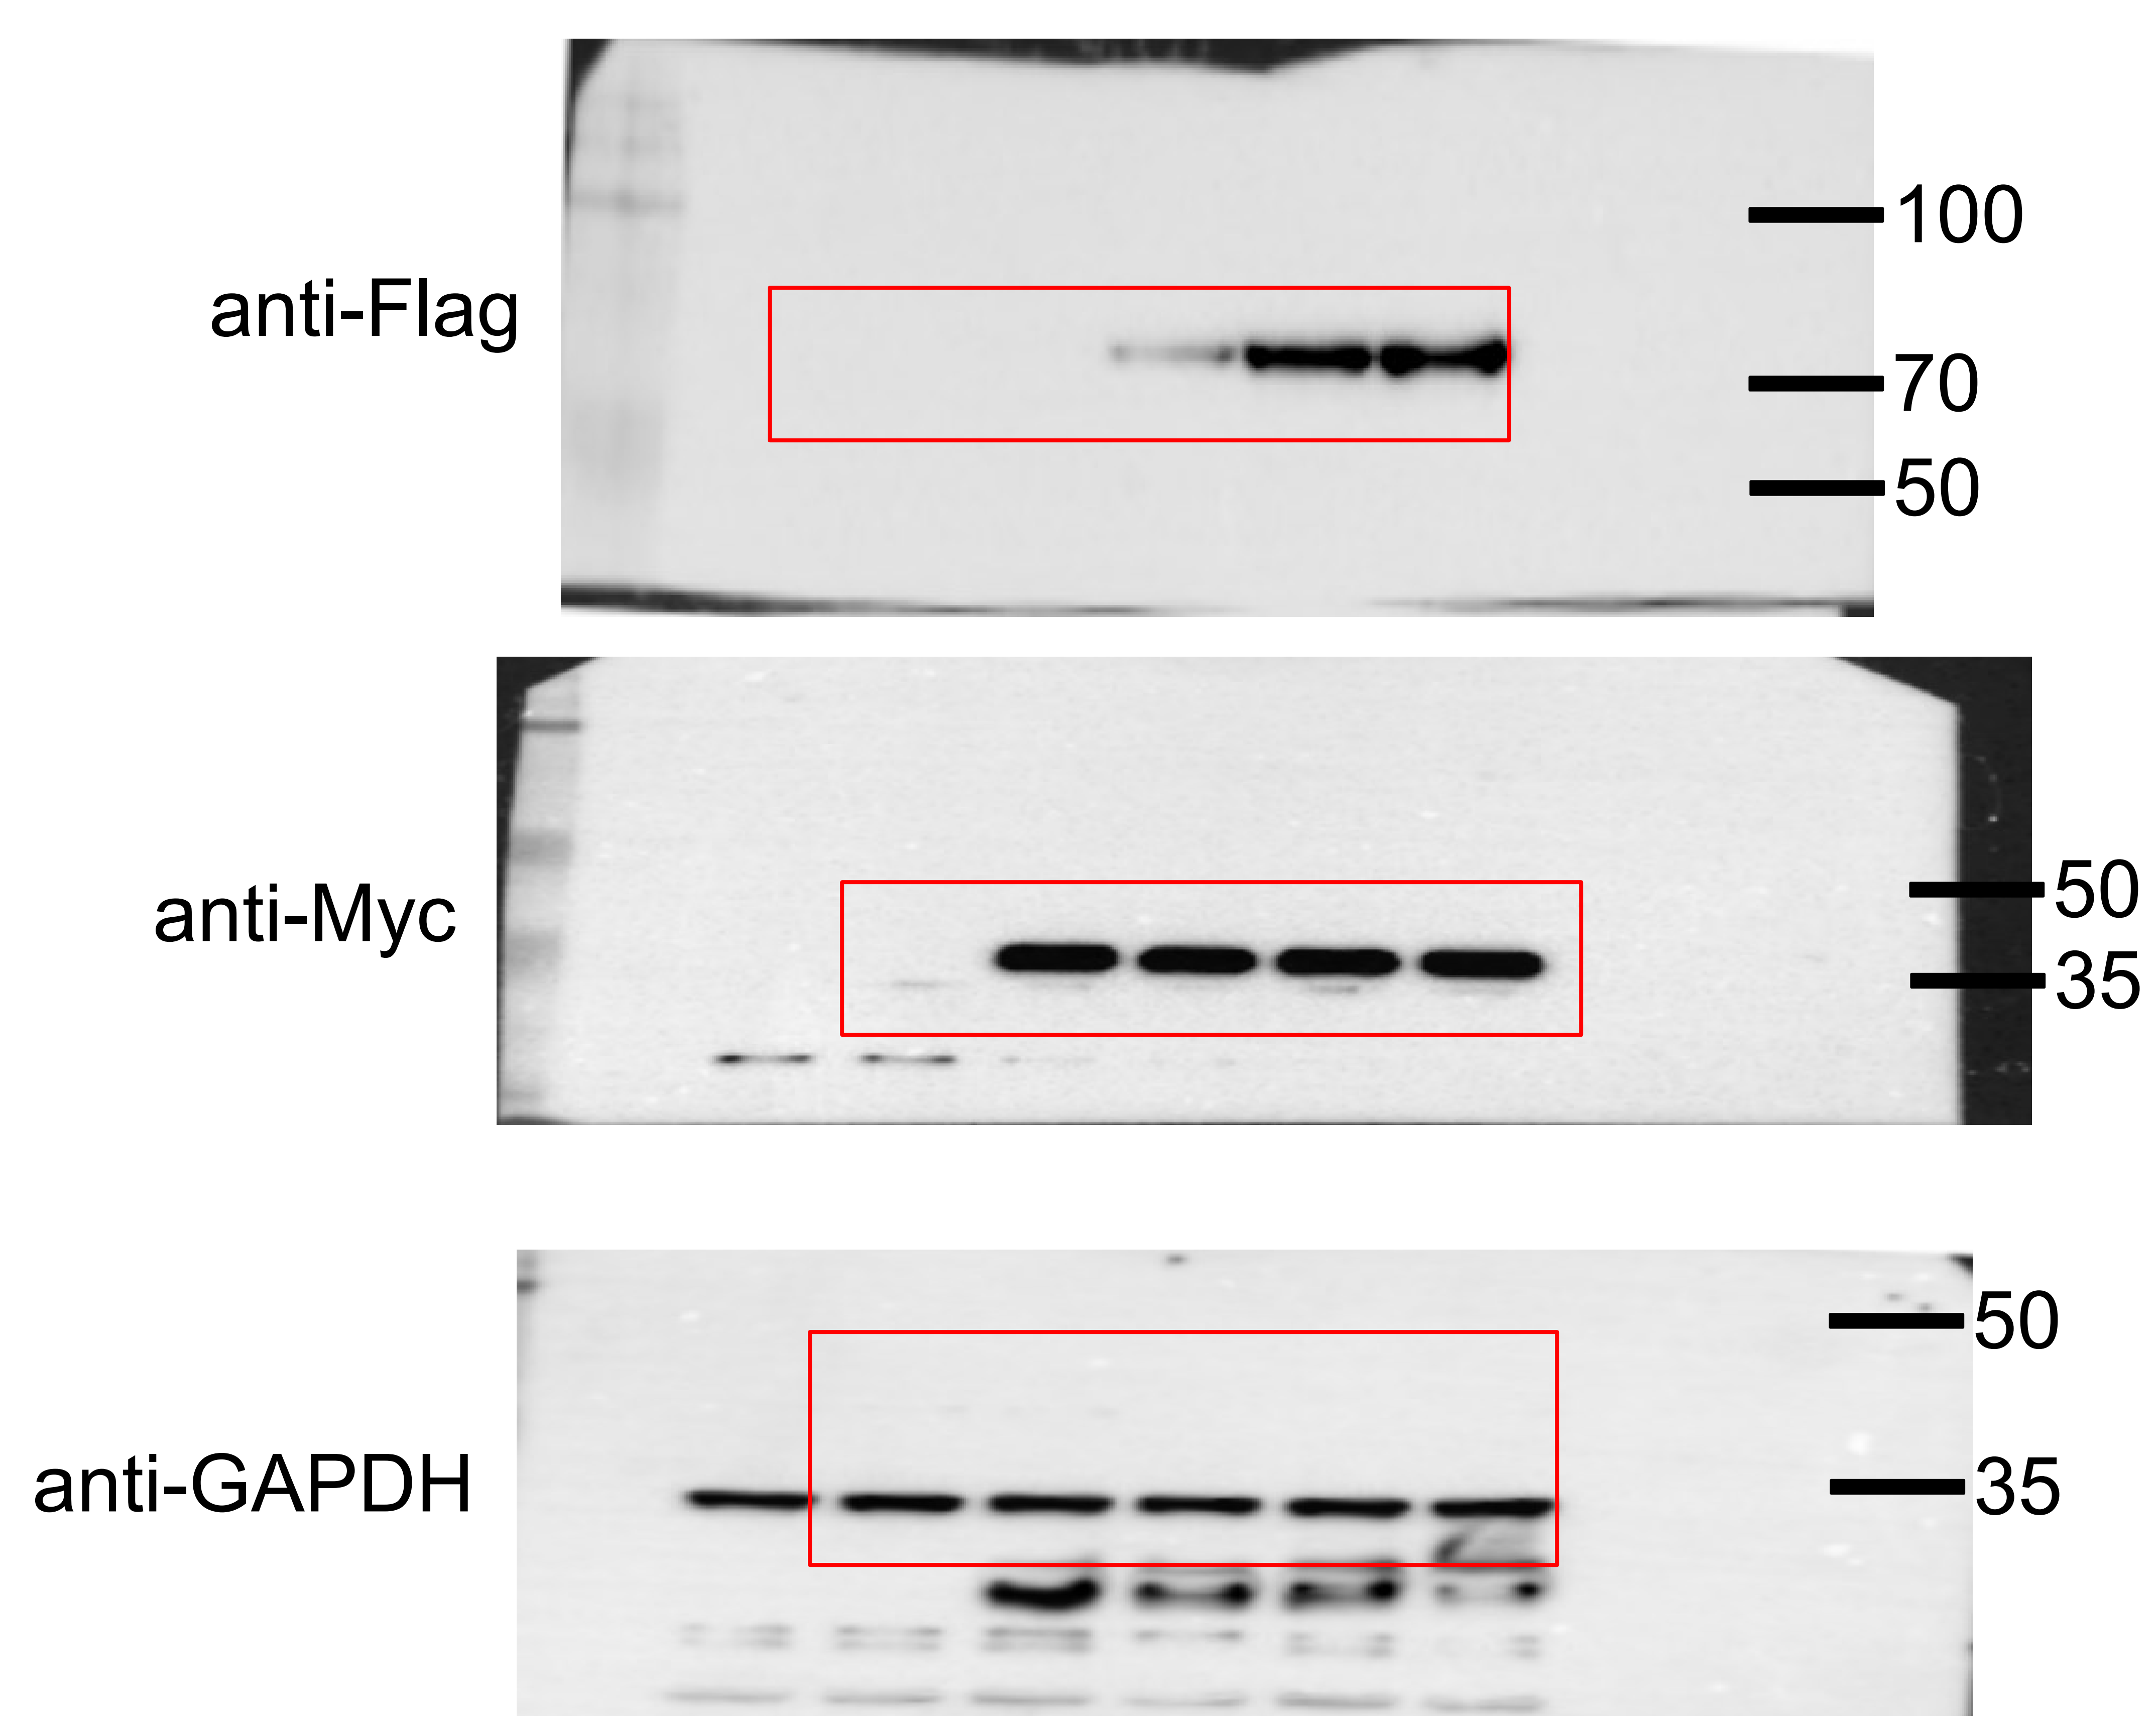**F**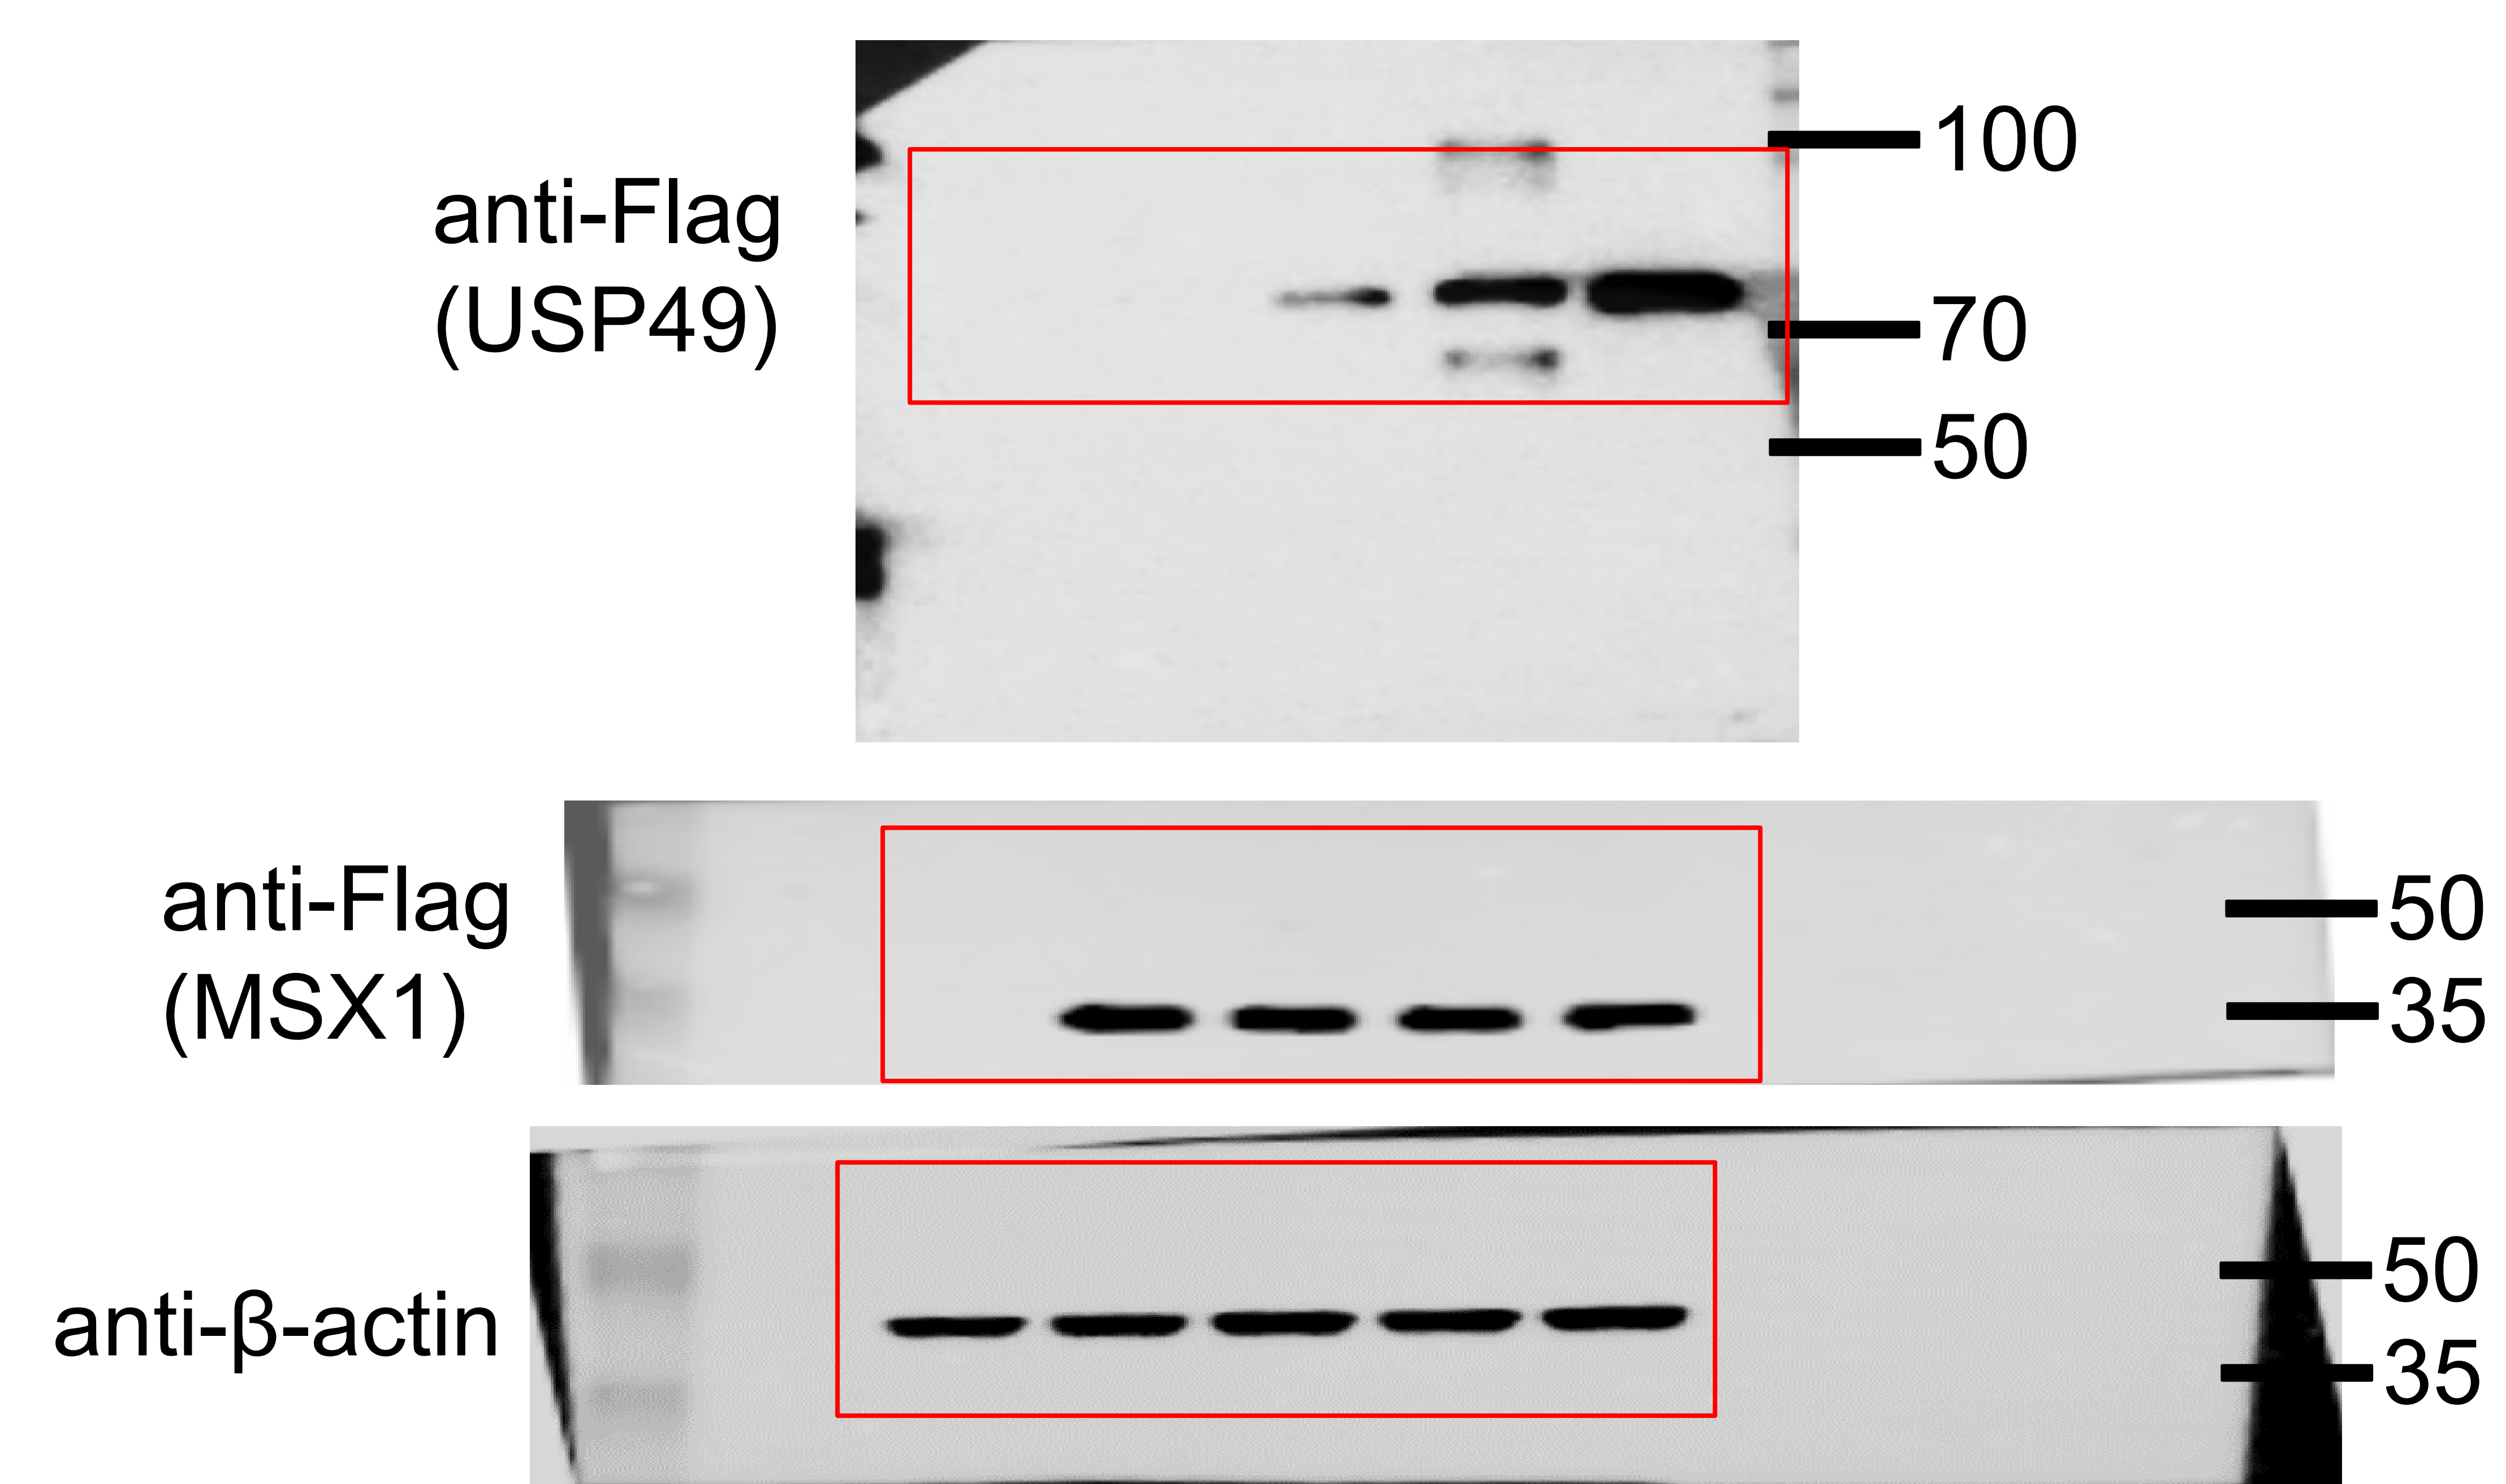

# Uncropped blots of Supplementary Fig. S4

## A

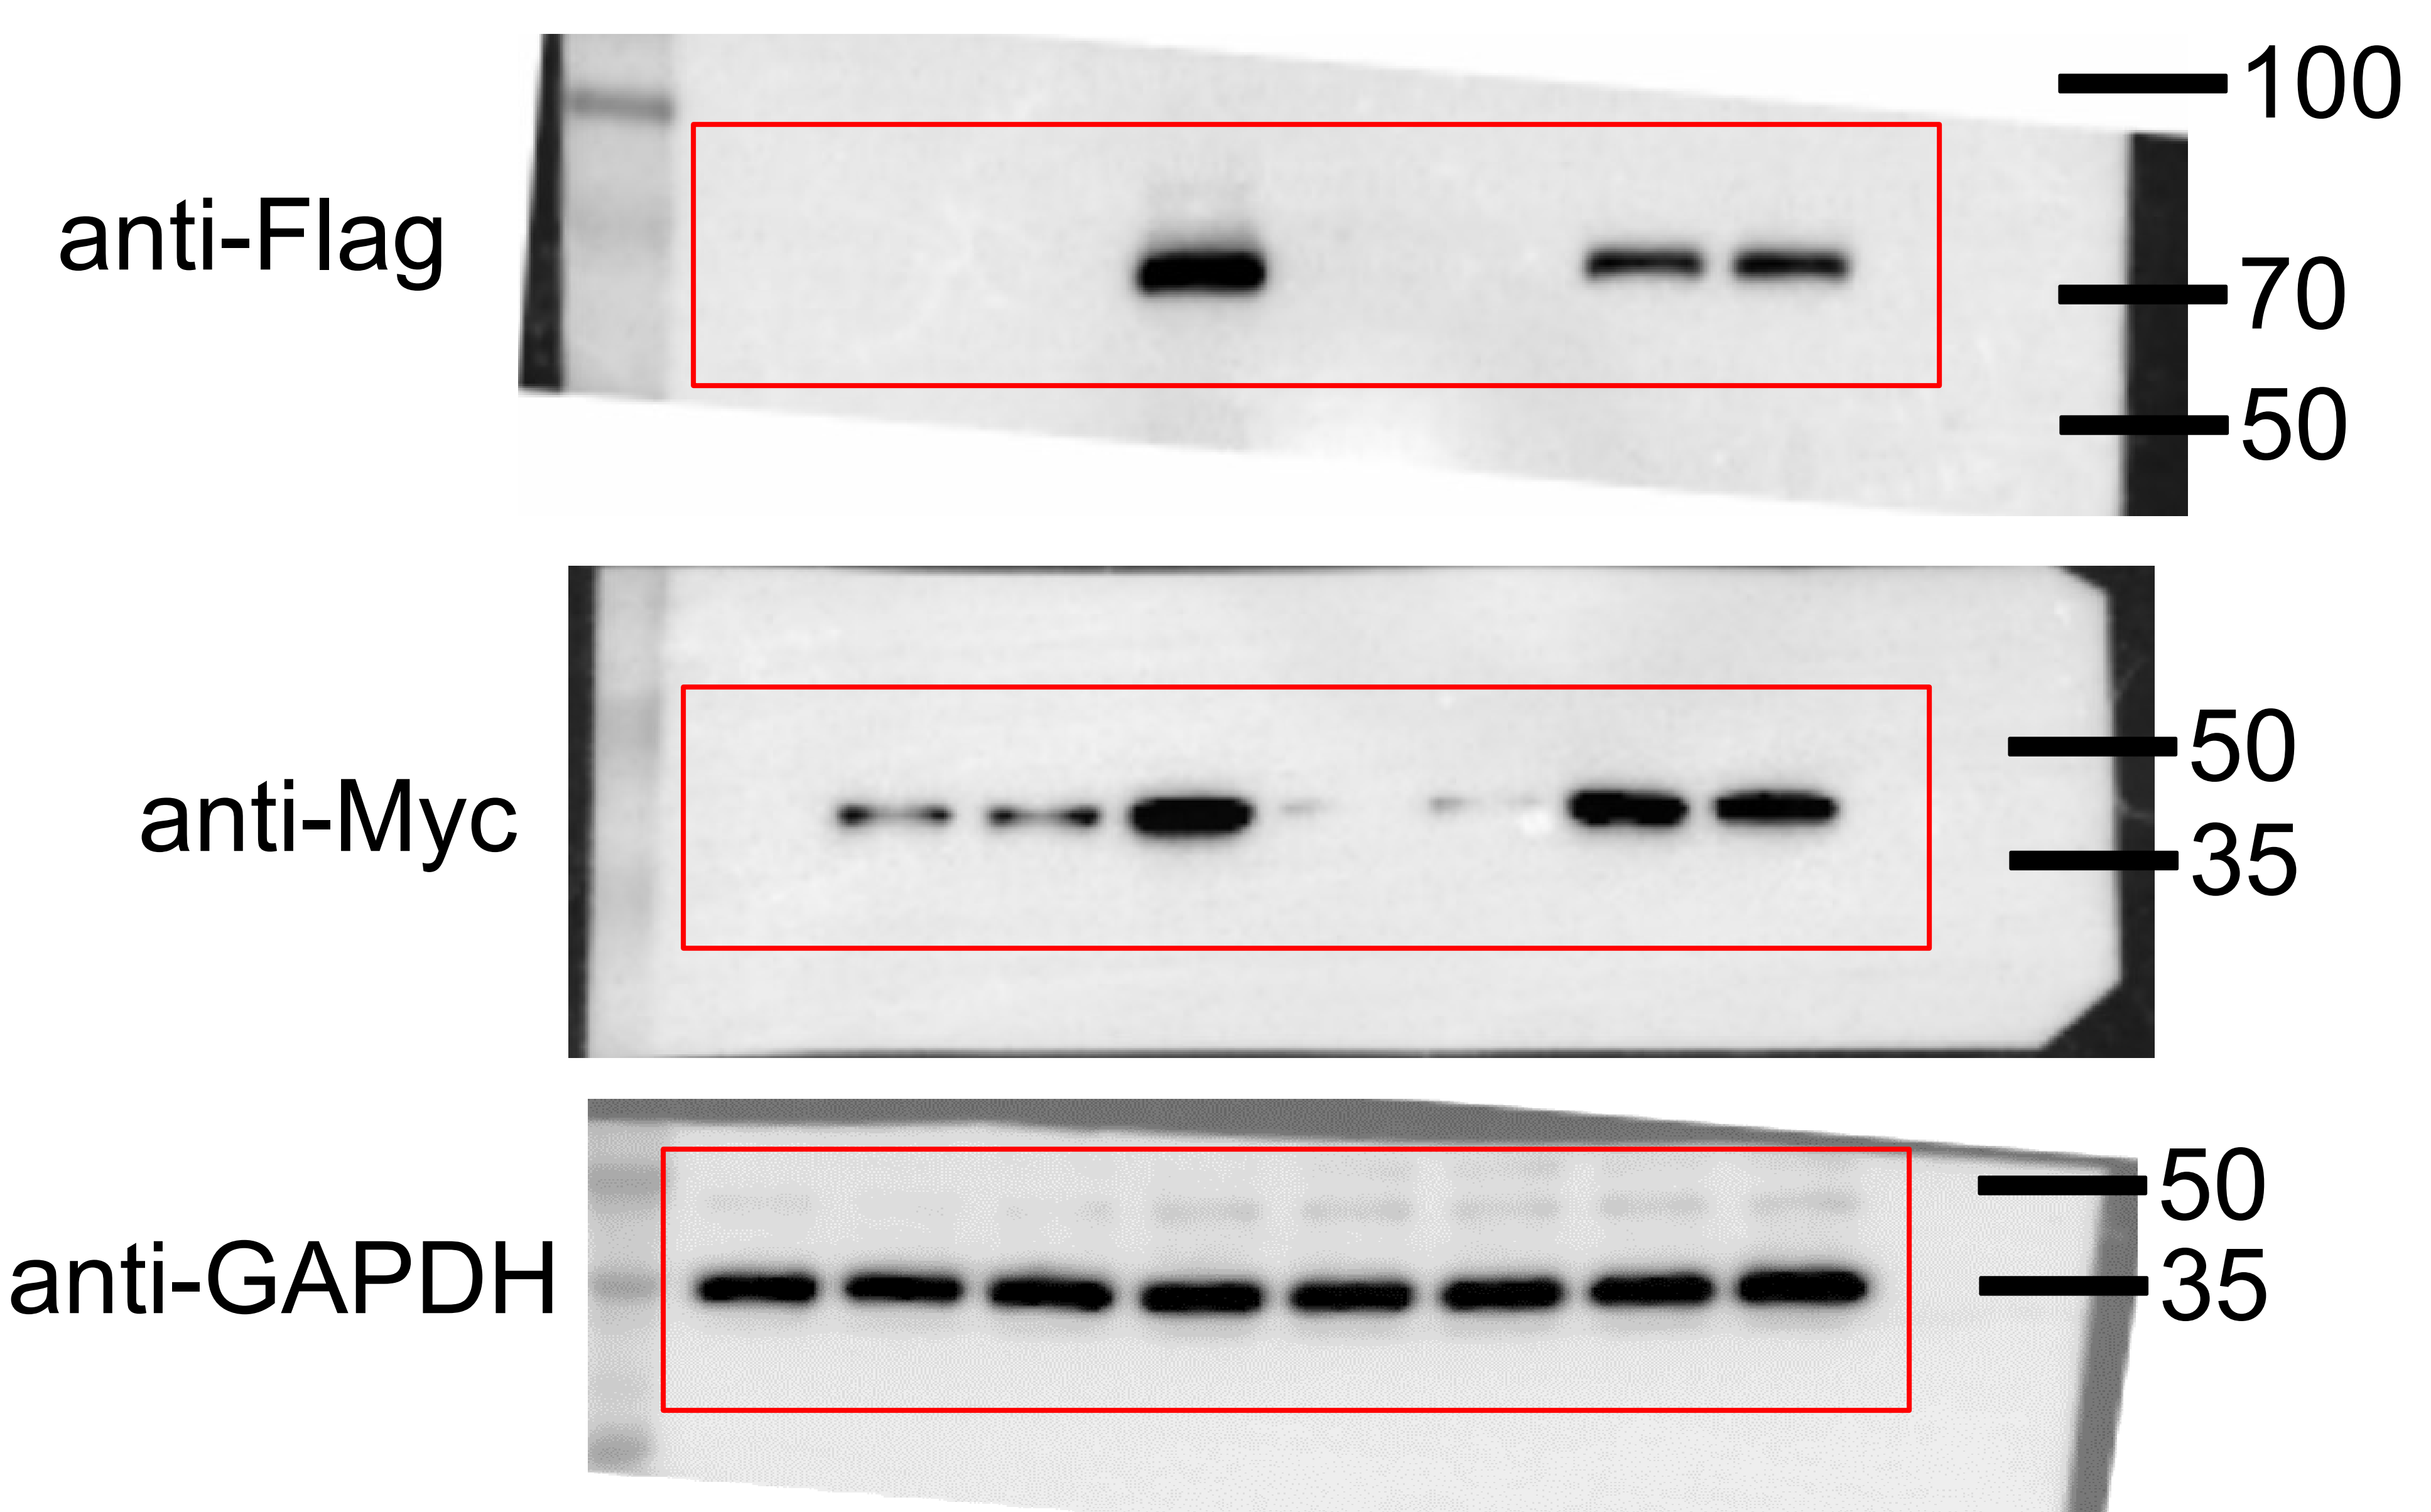

## B

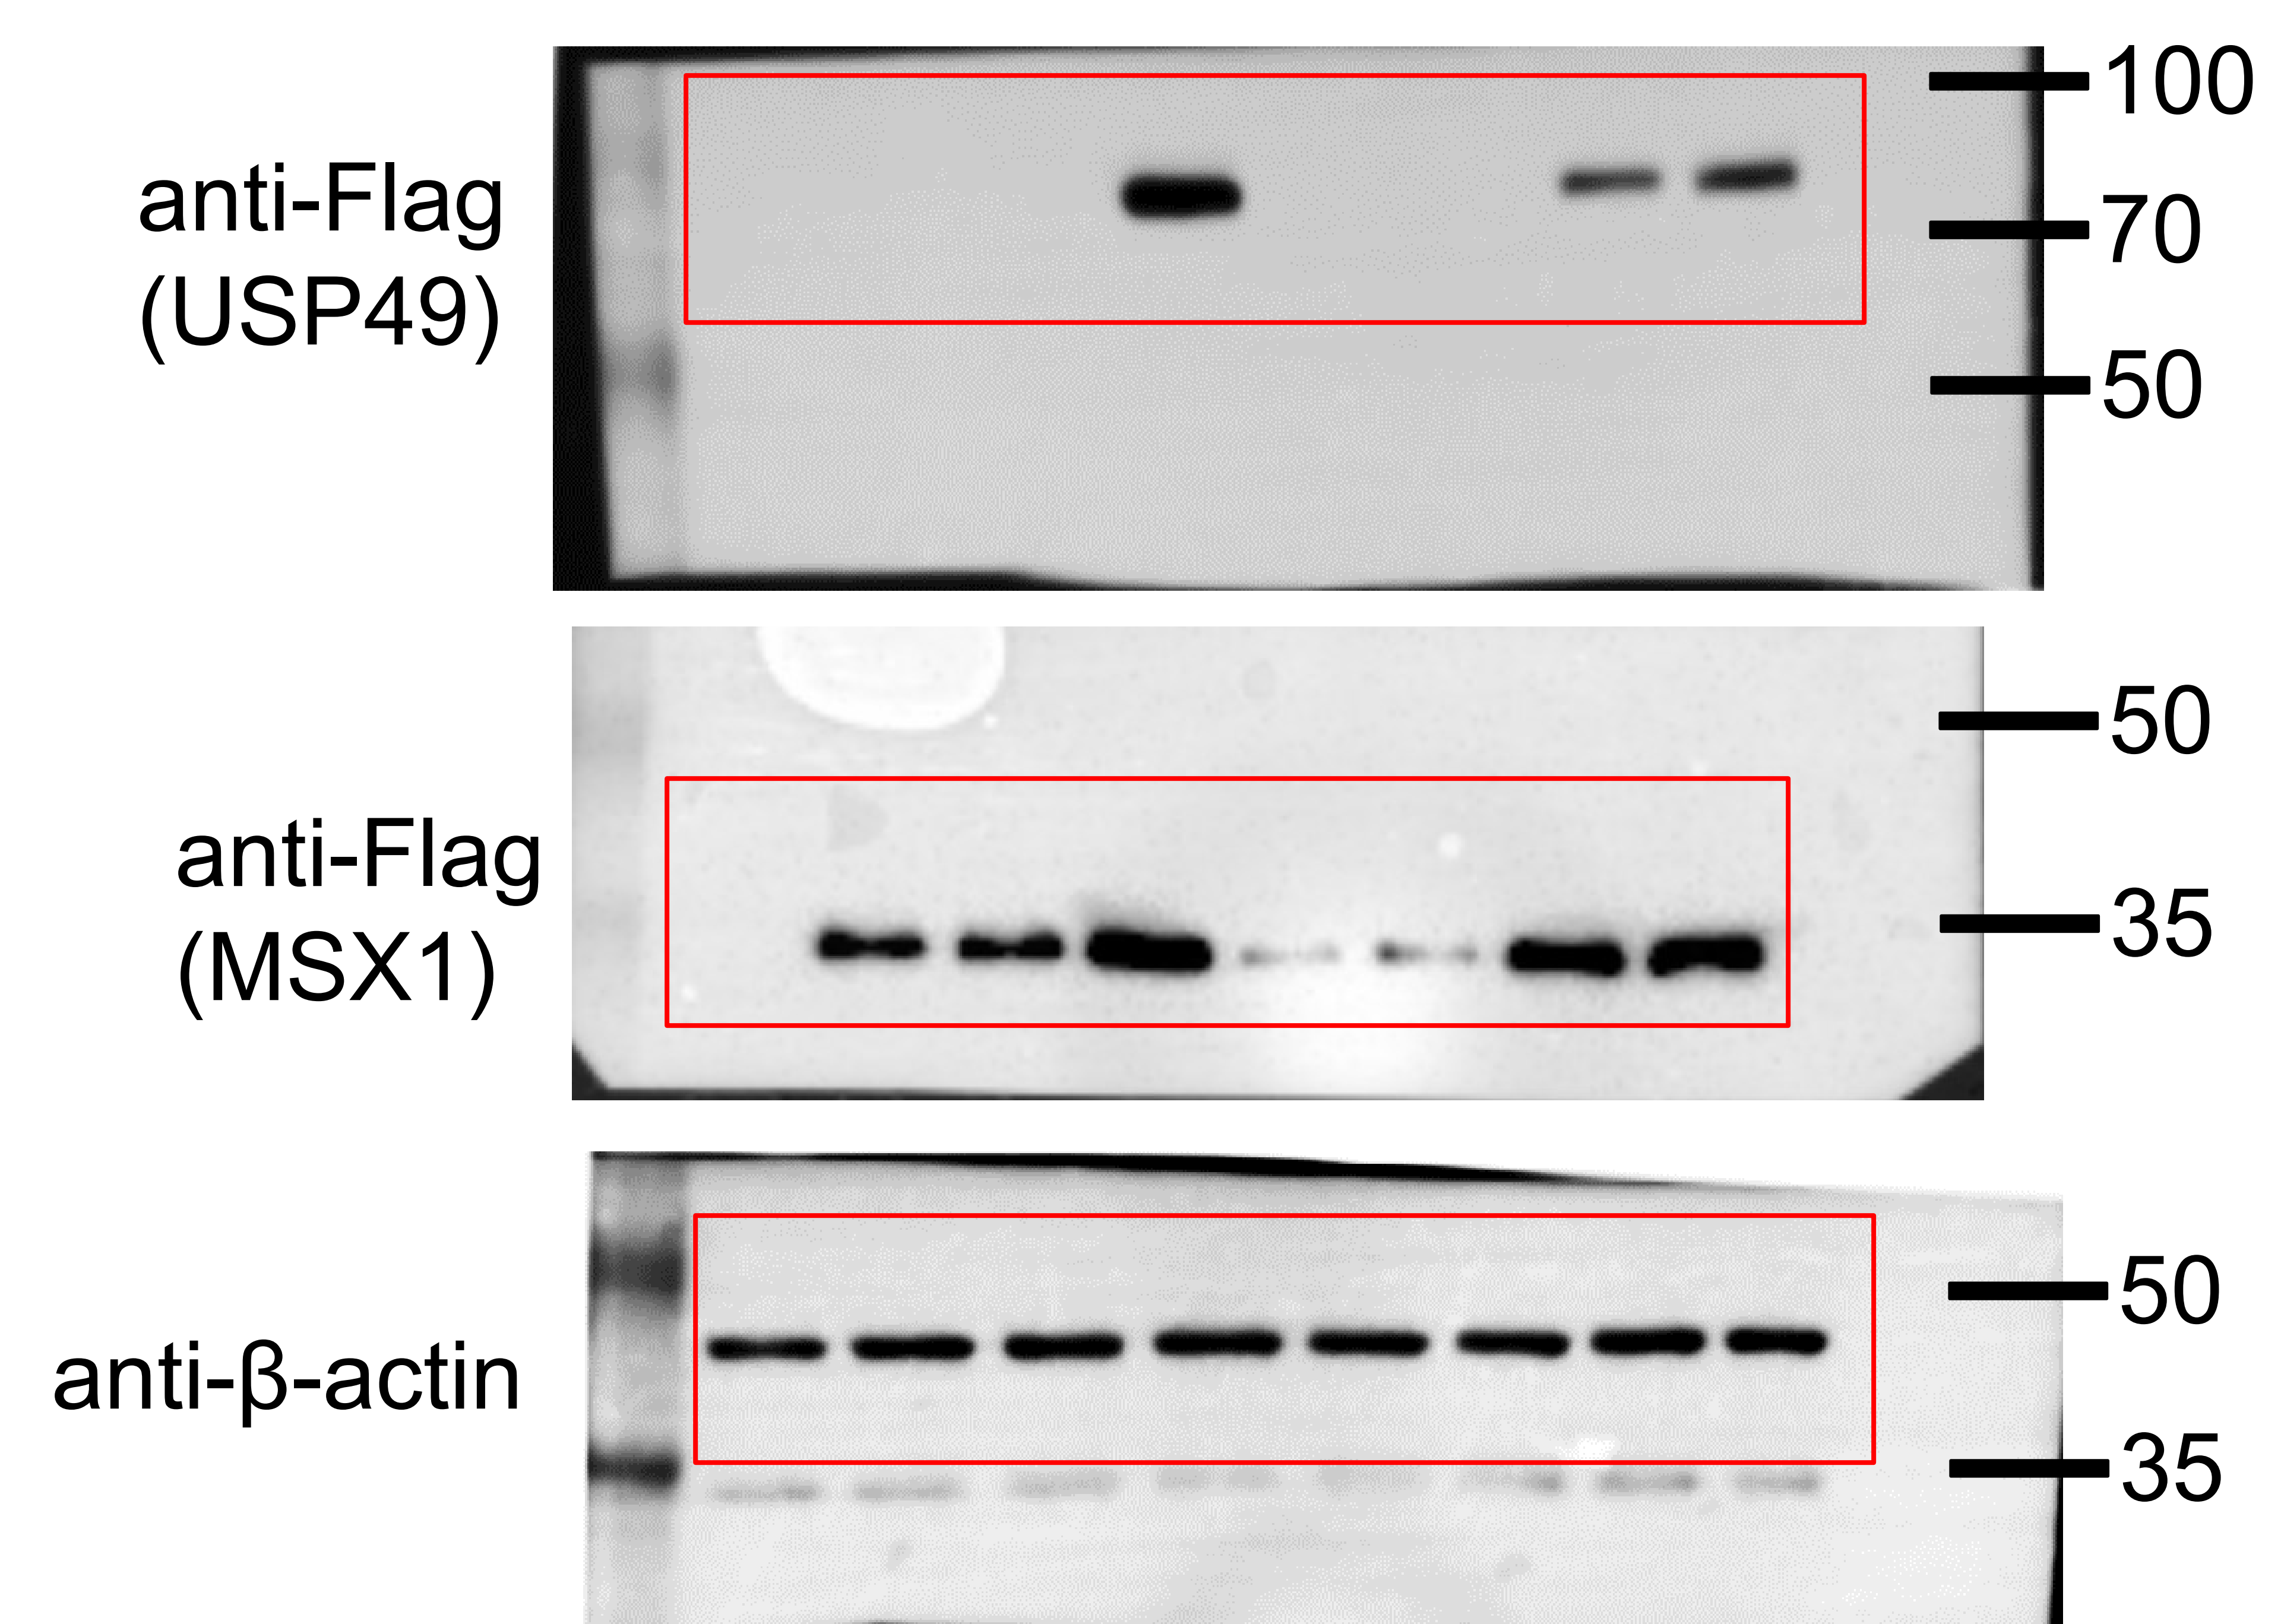

# Uncropped blots of Supplementary Fig. S5

## A

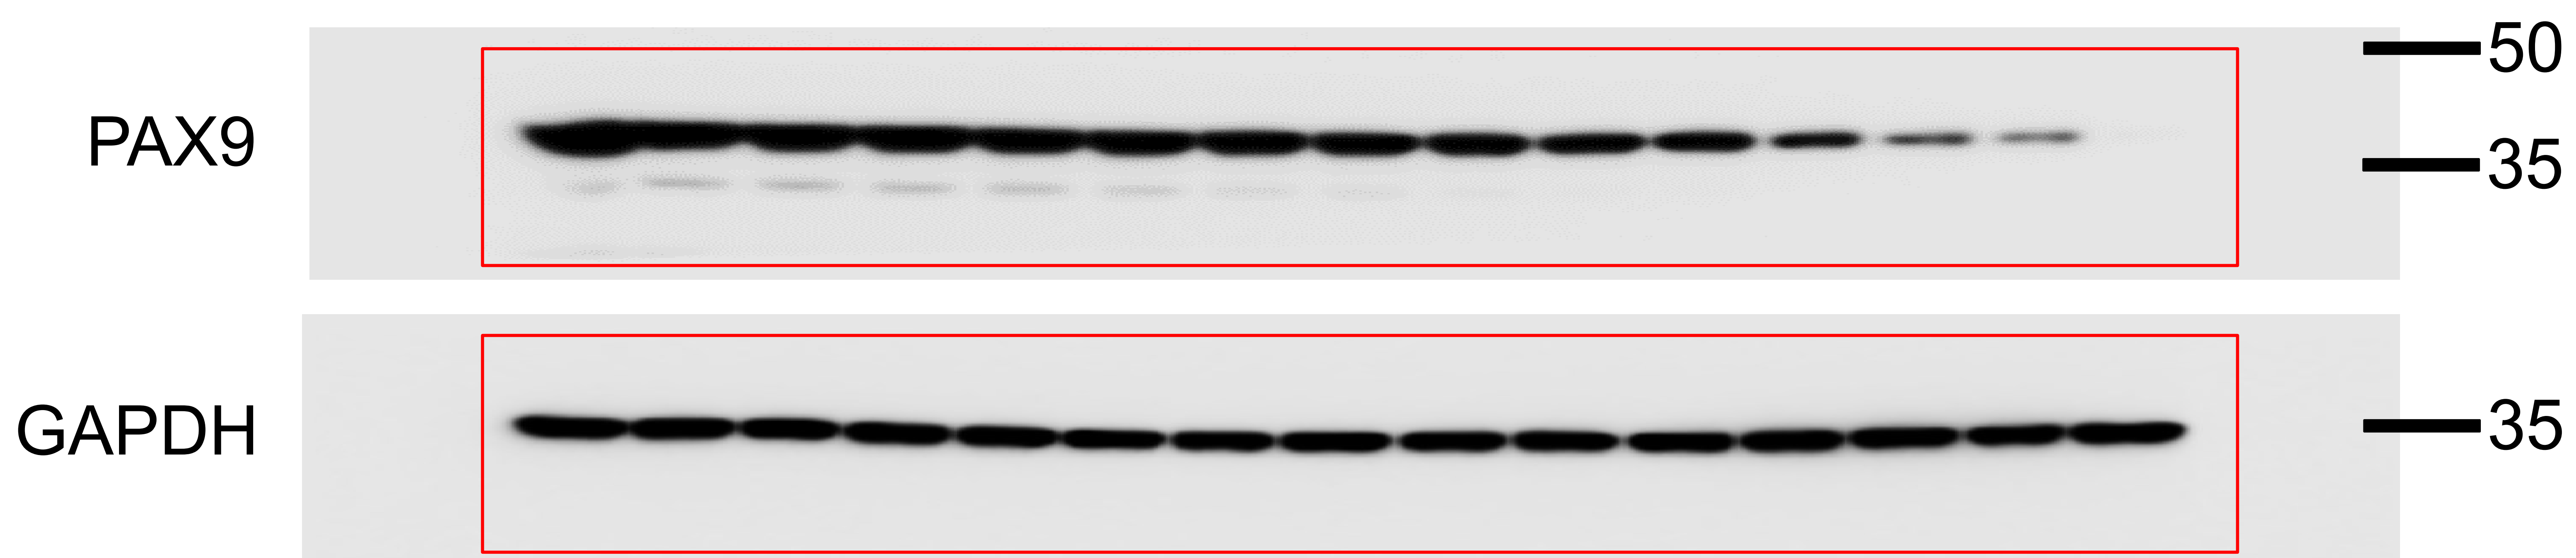

## B

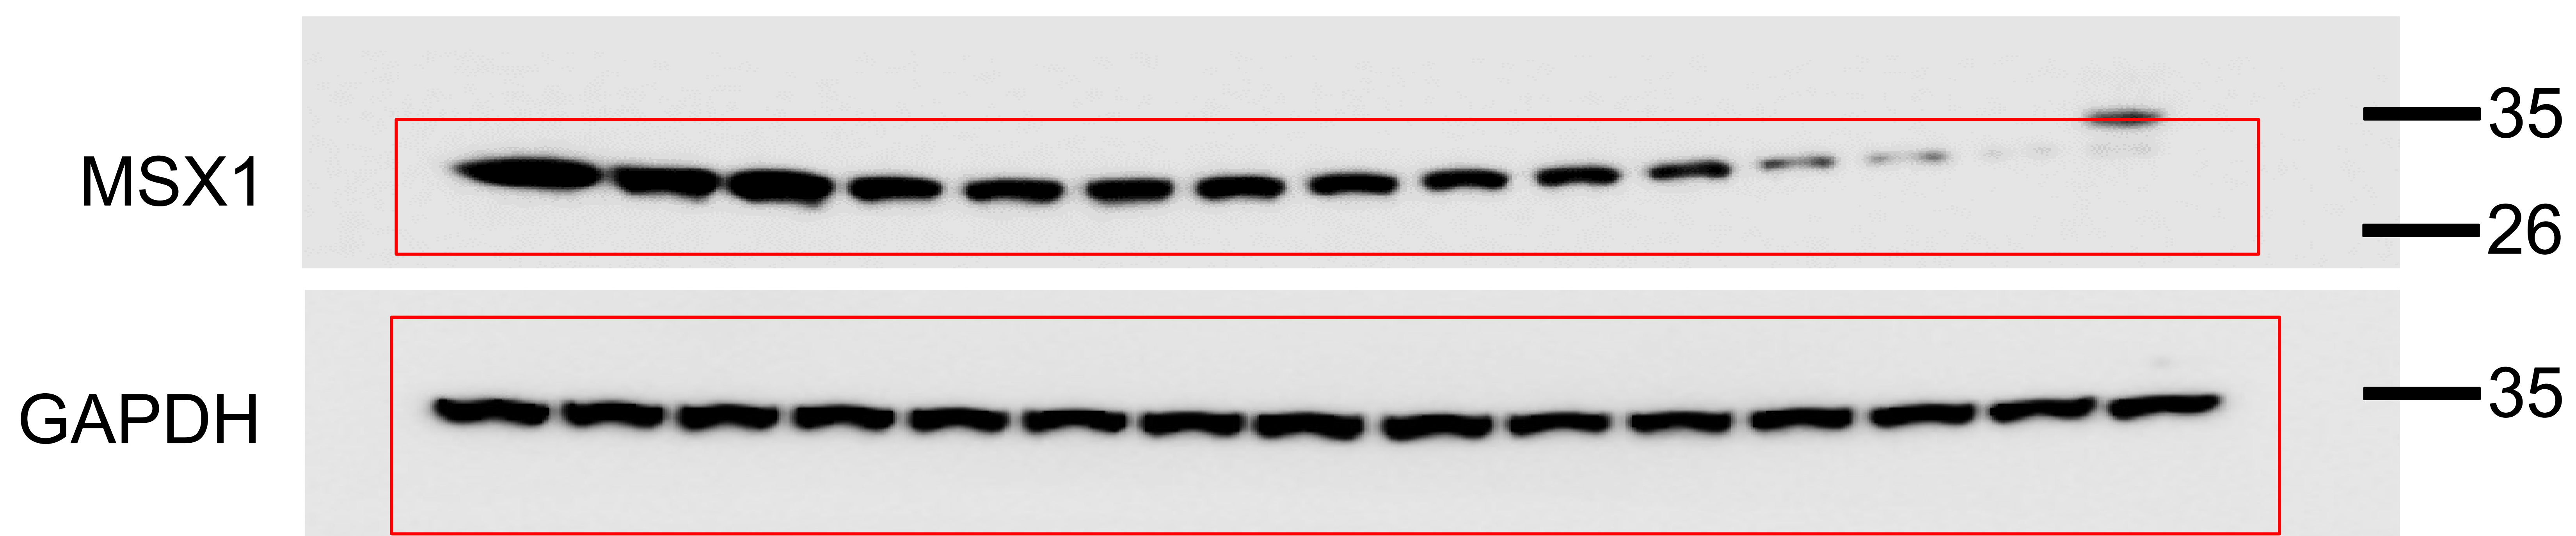

## C

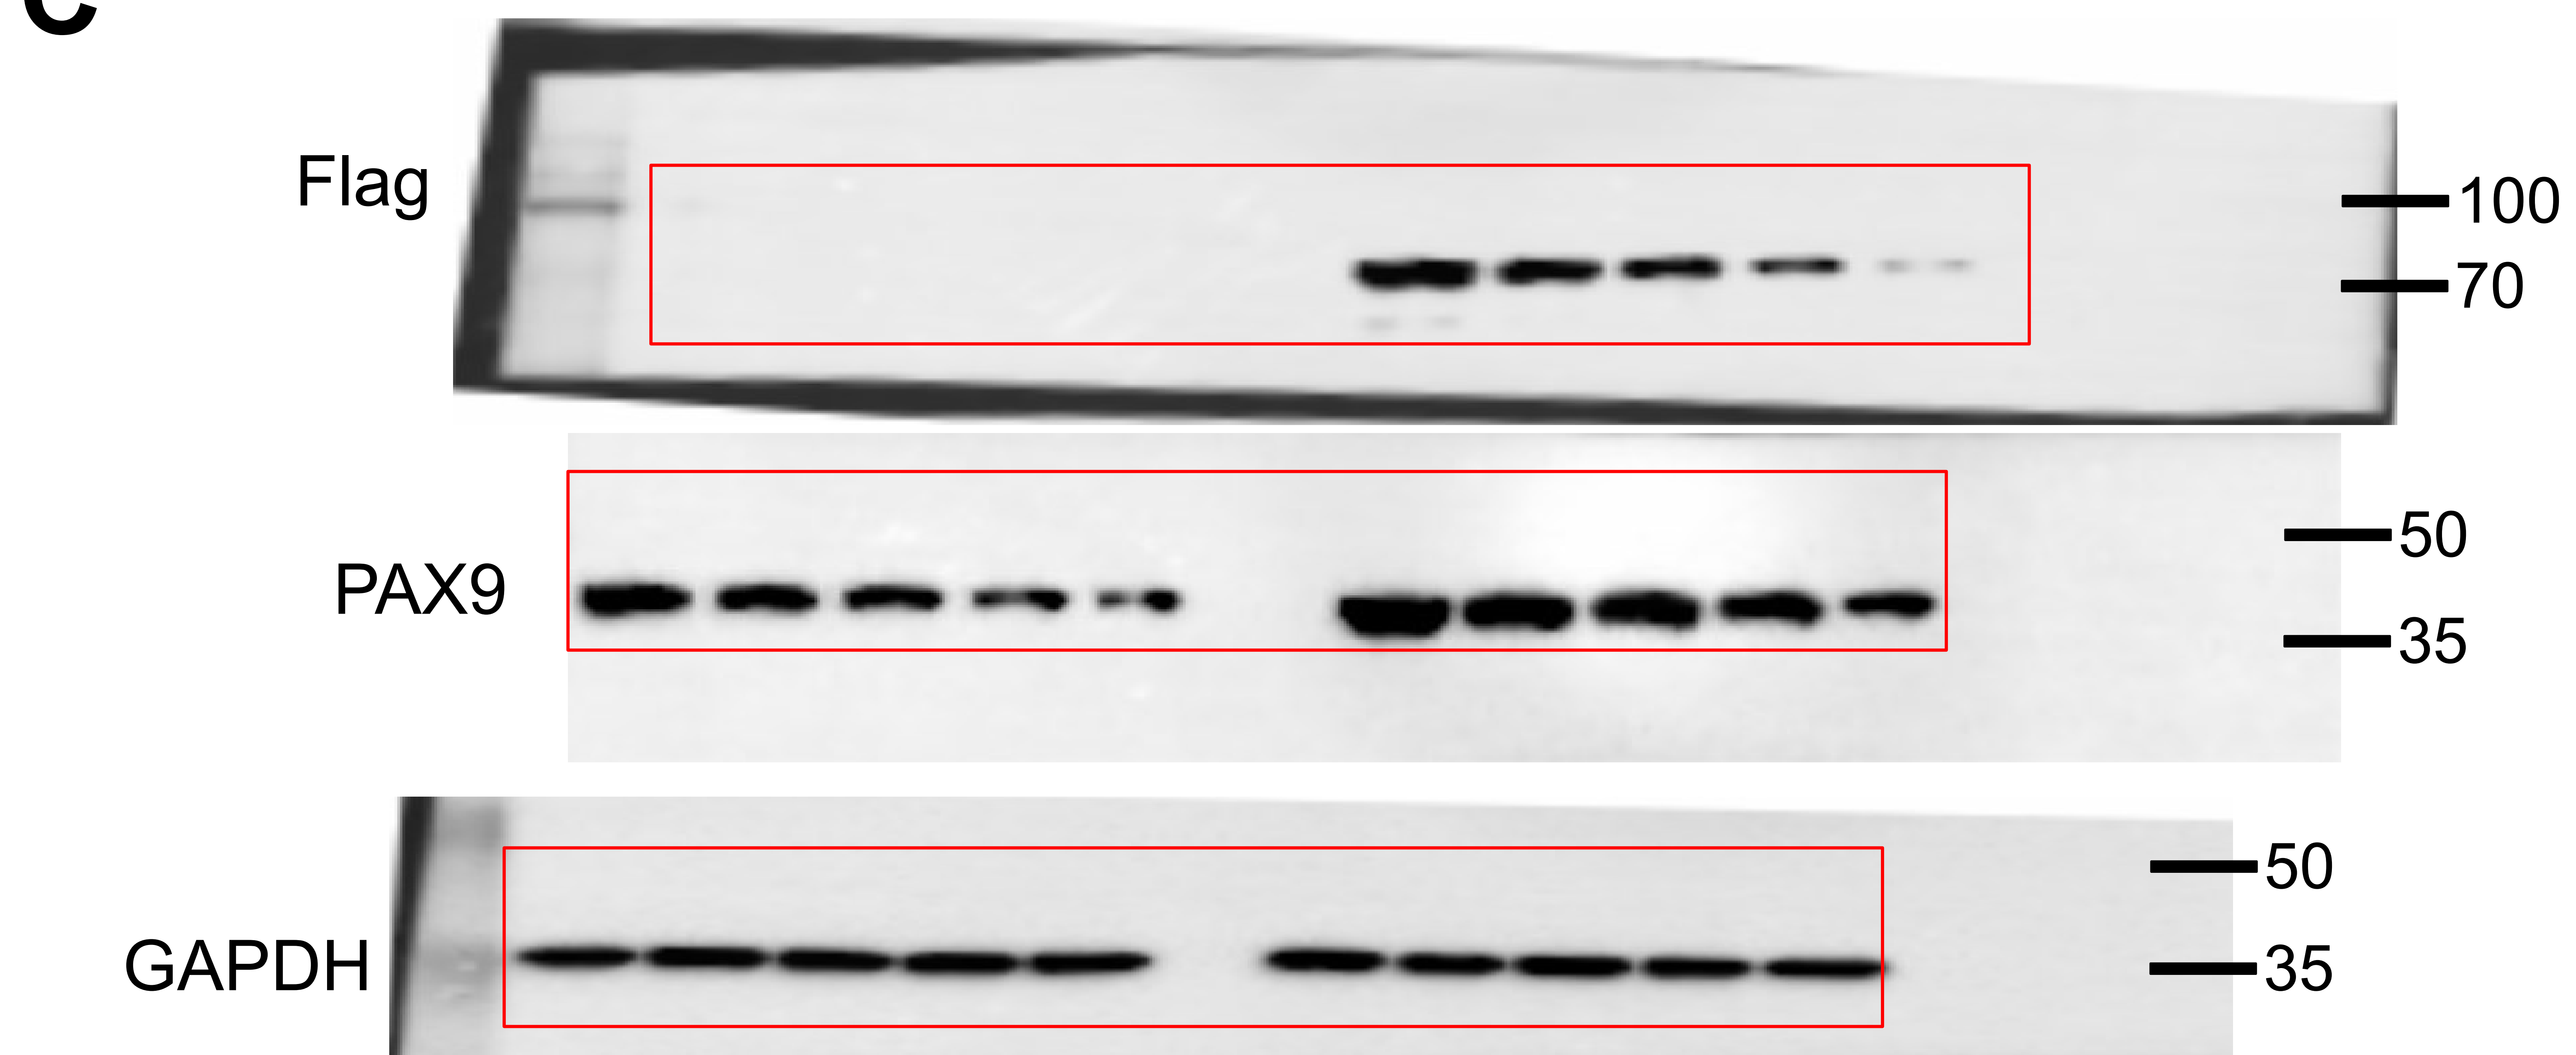

## D

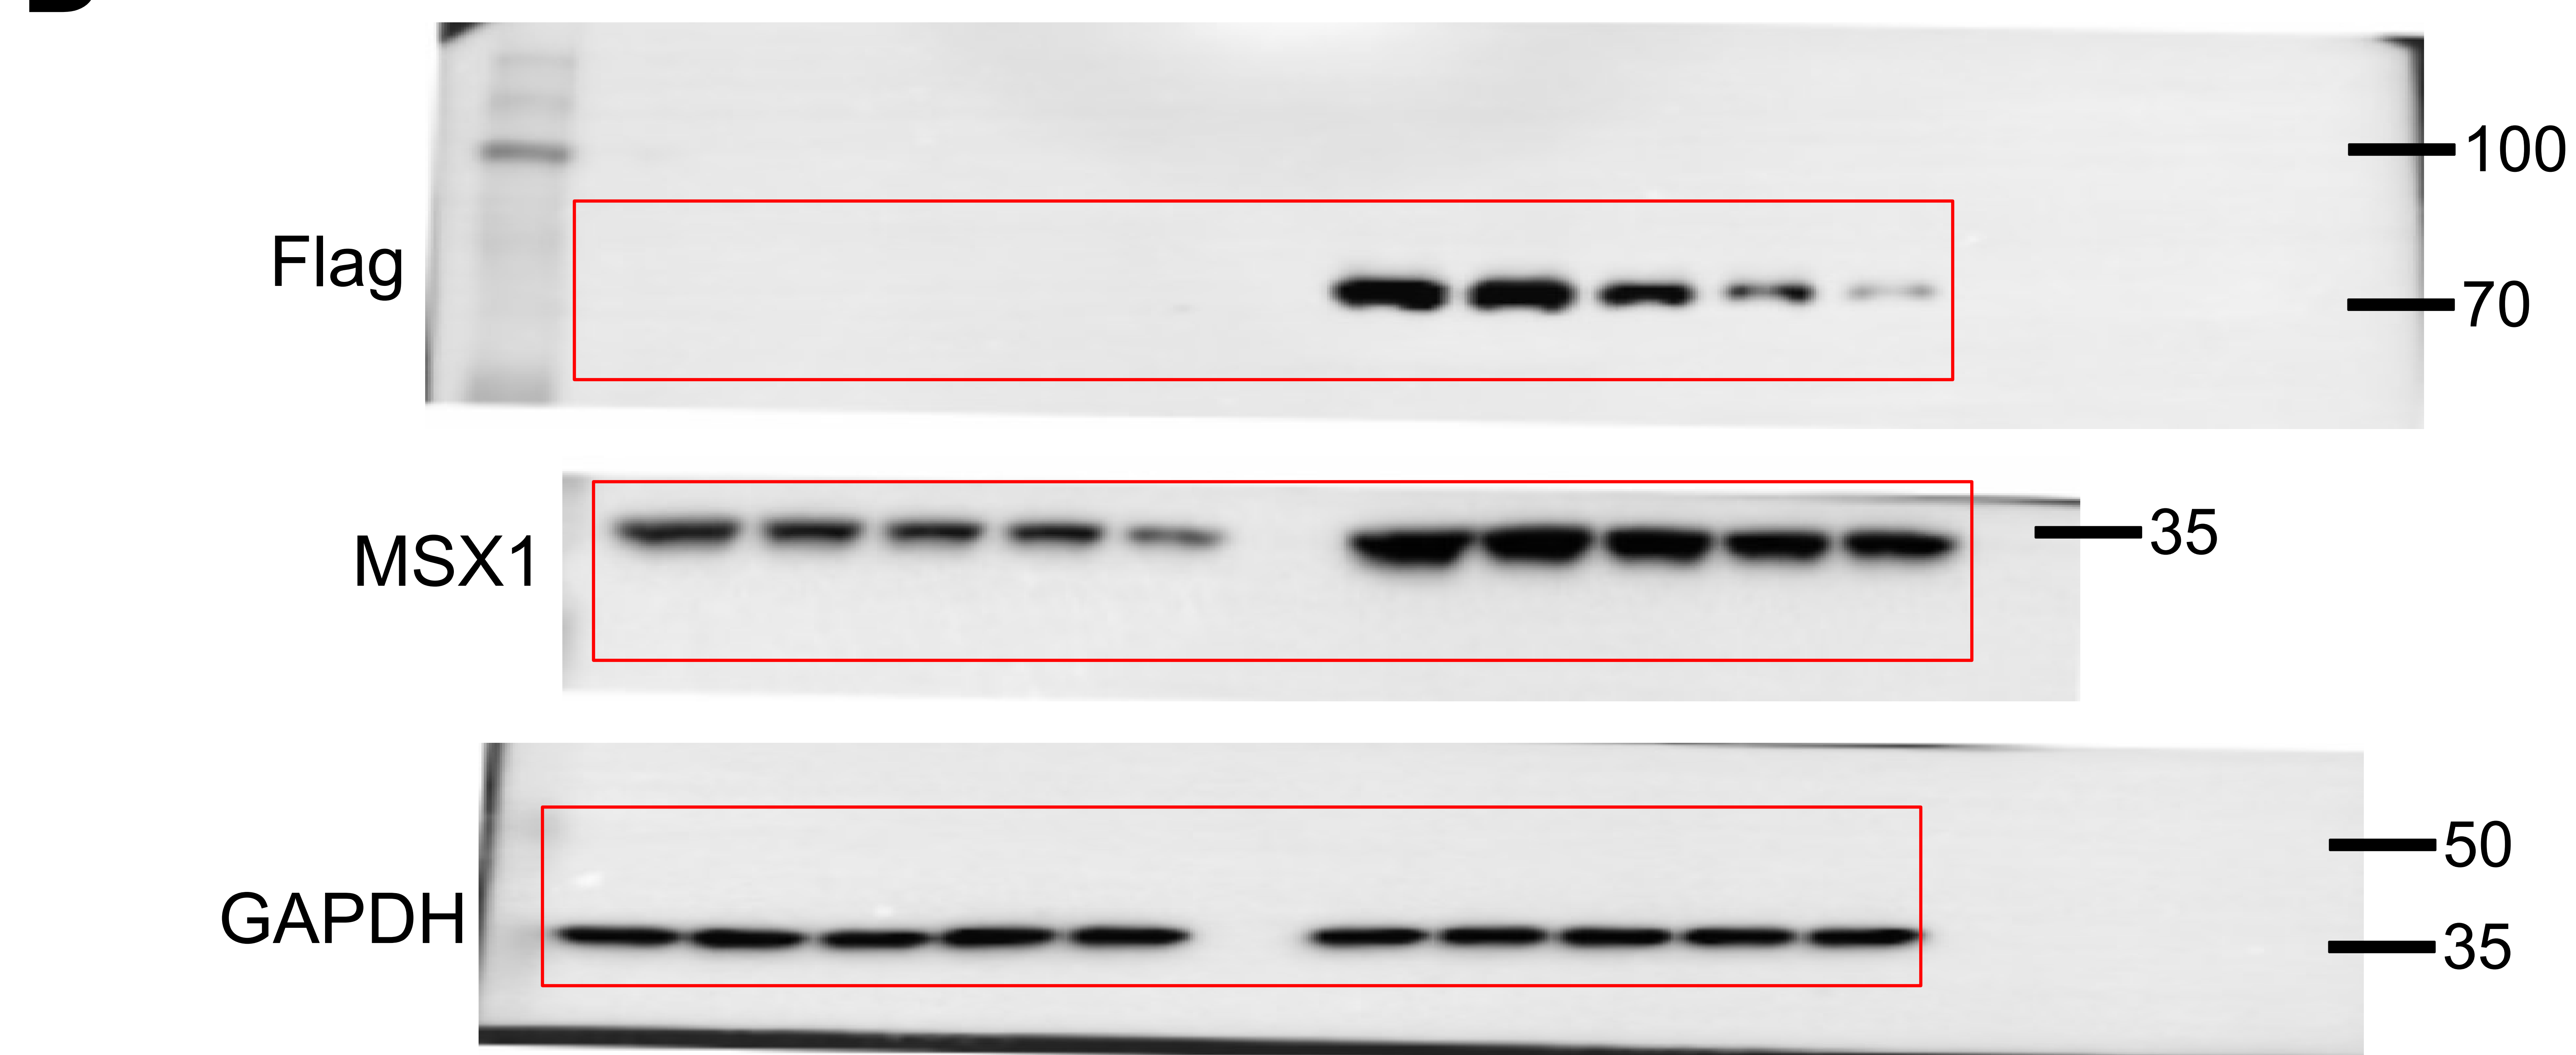

# Uncropped blots of Supplementary Fig. S6

## A

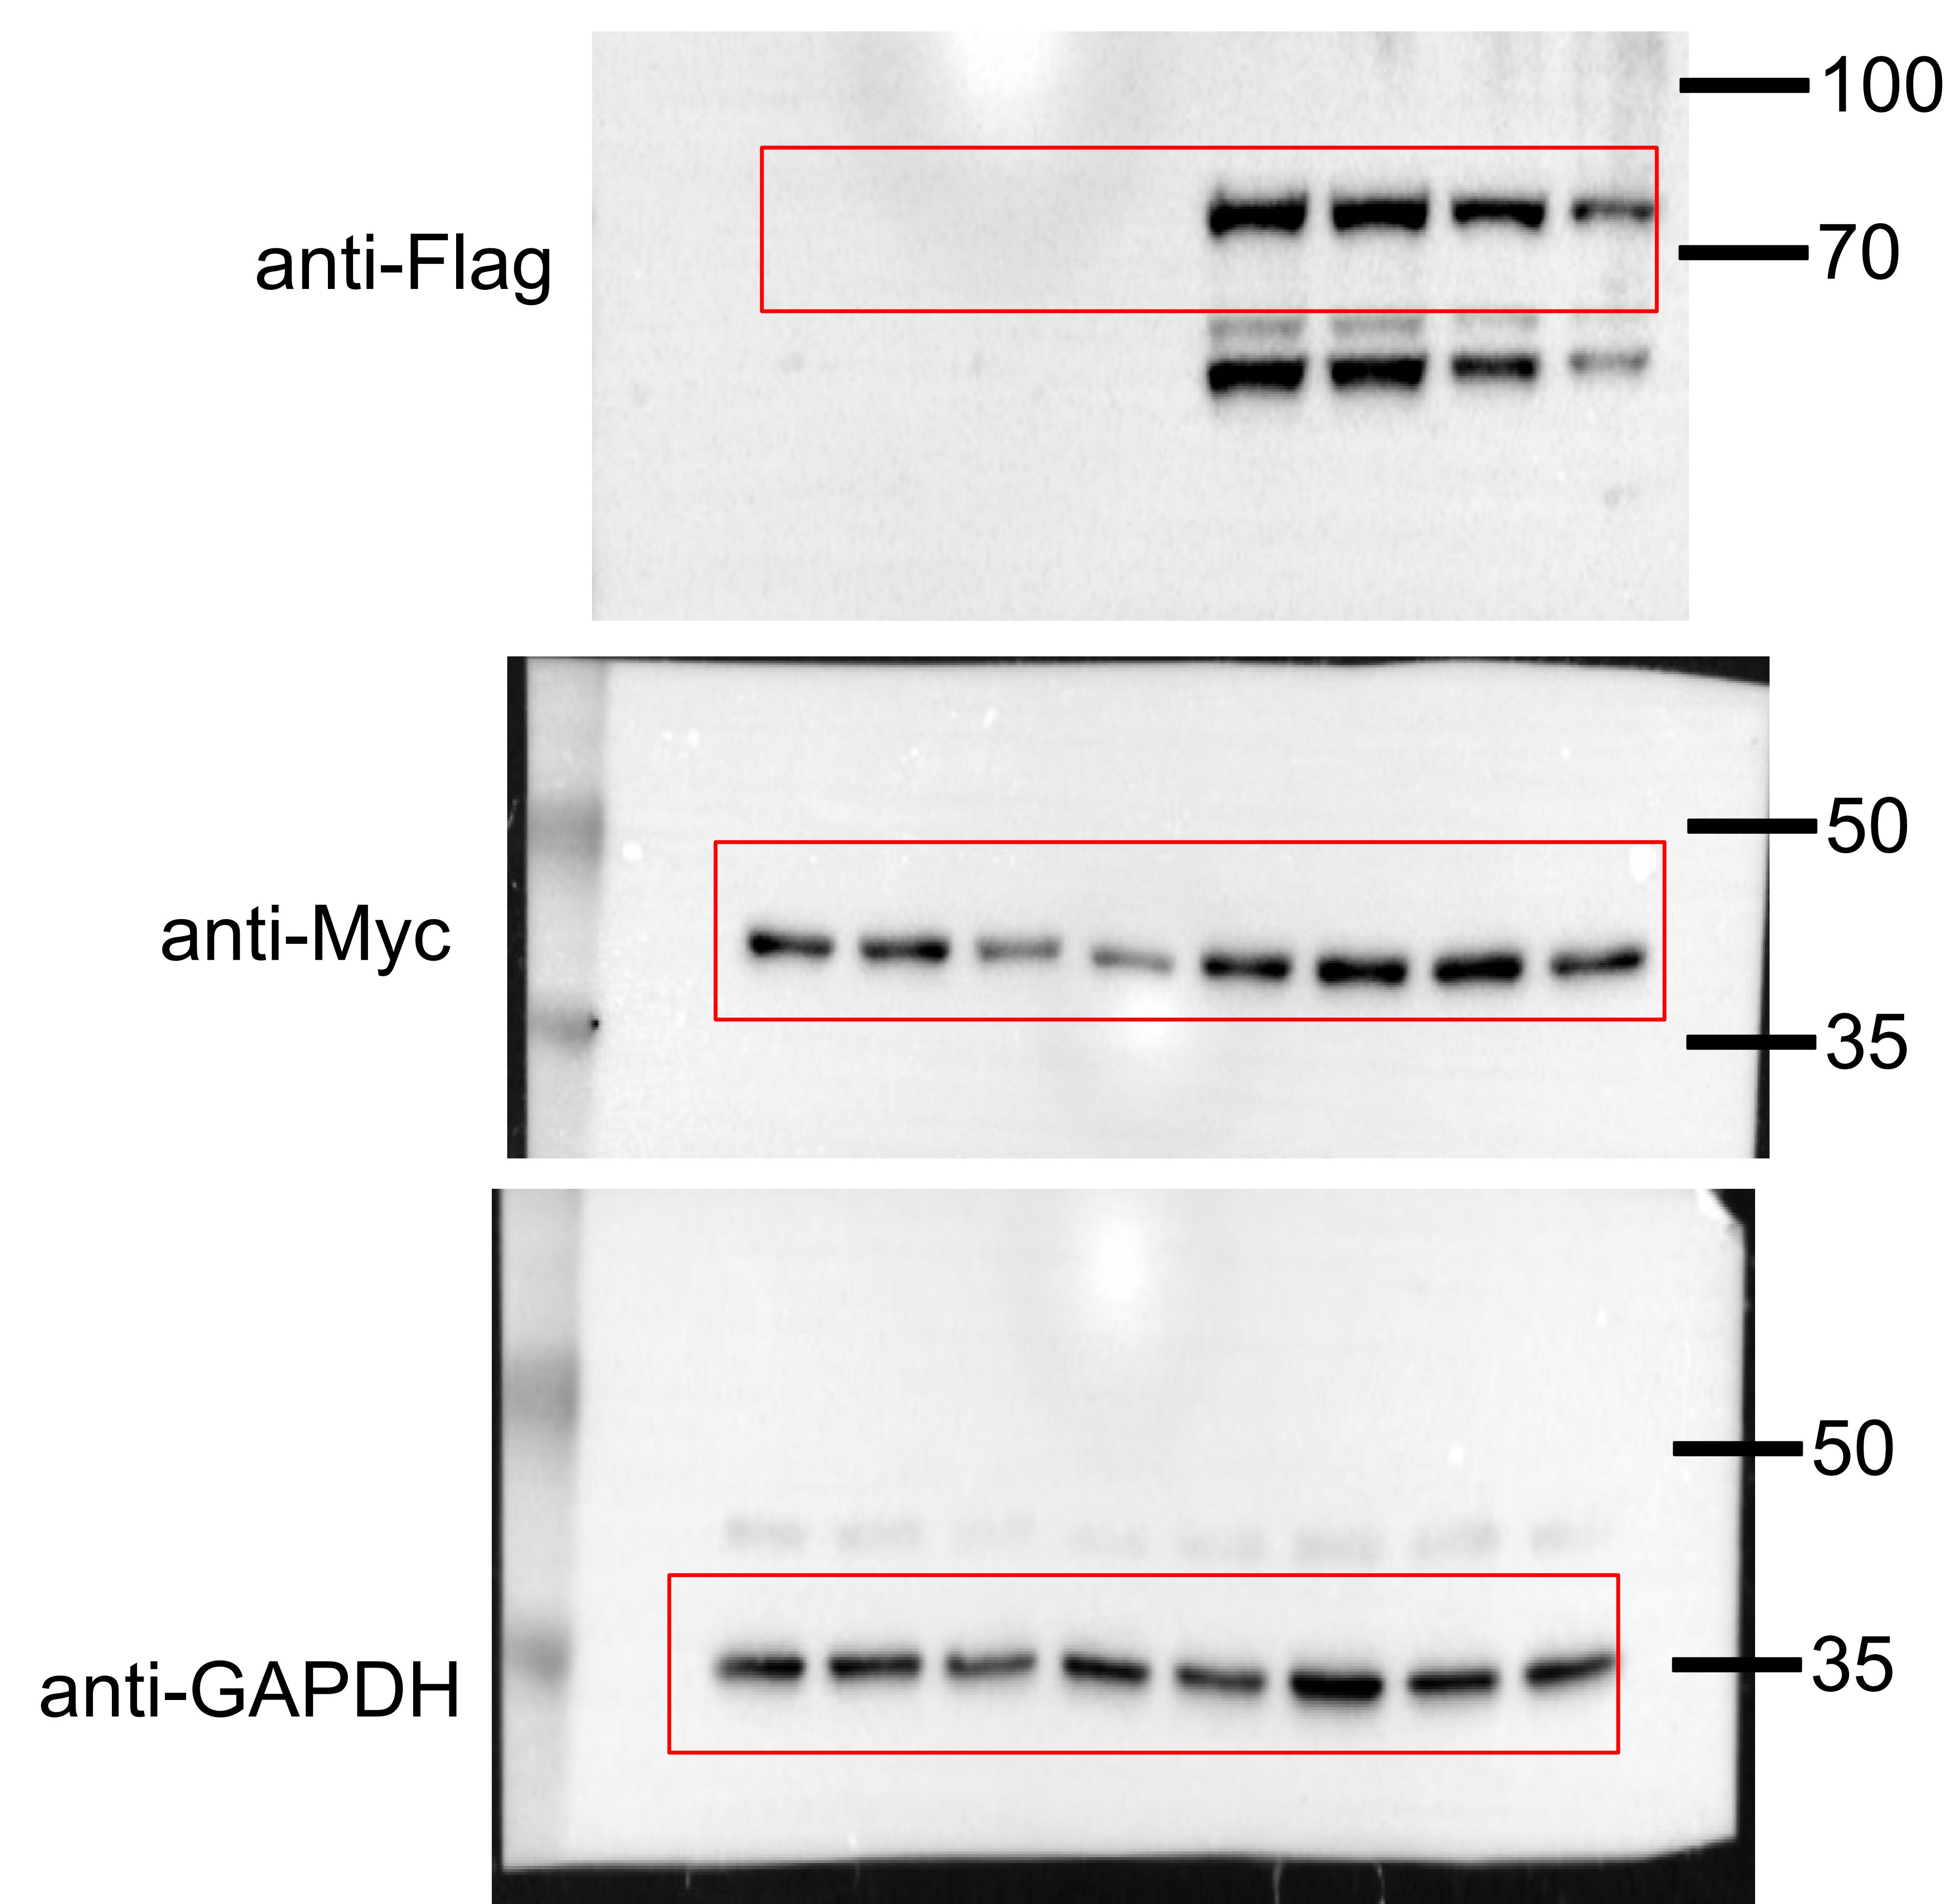

## B

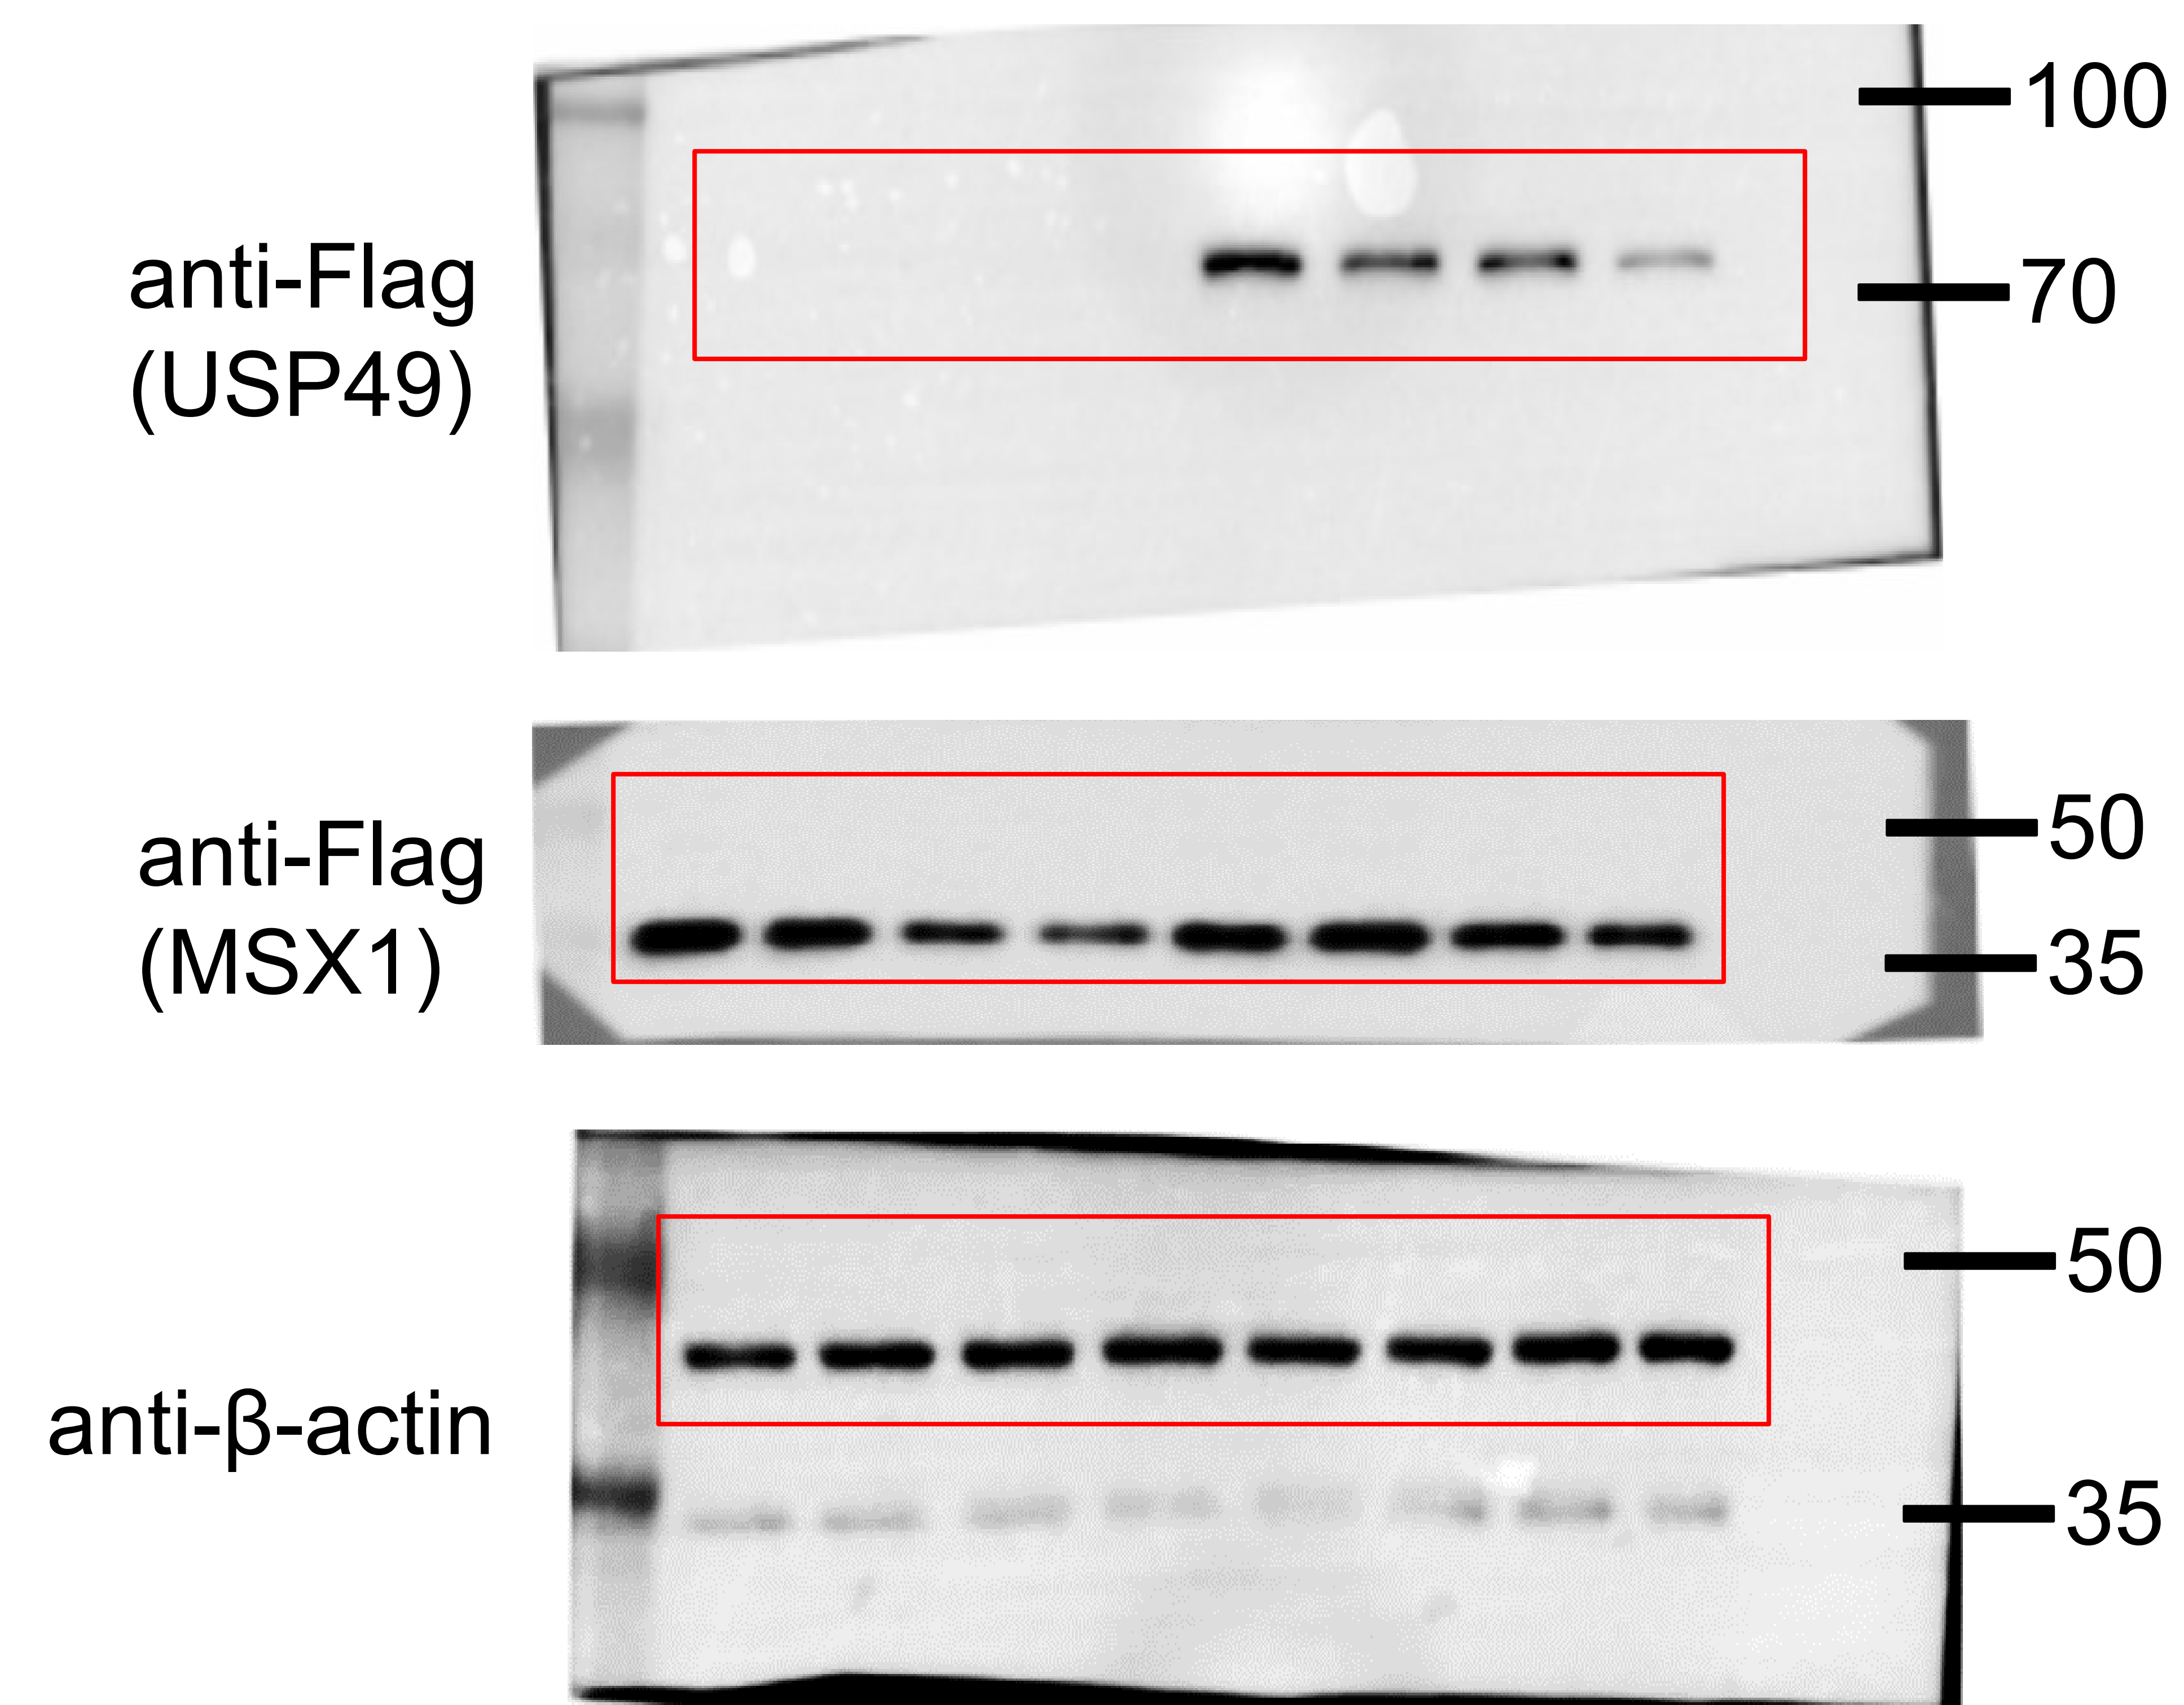

## C

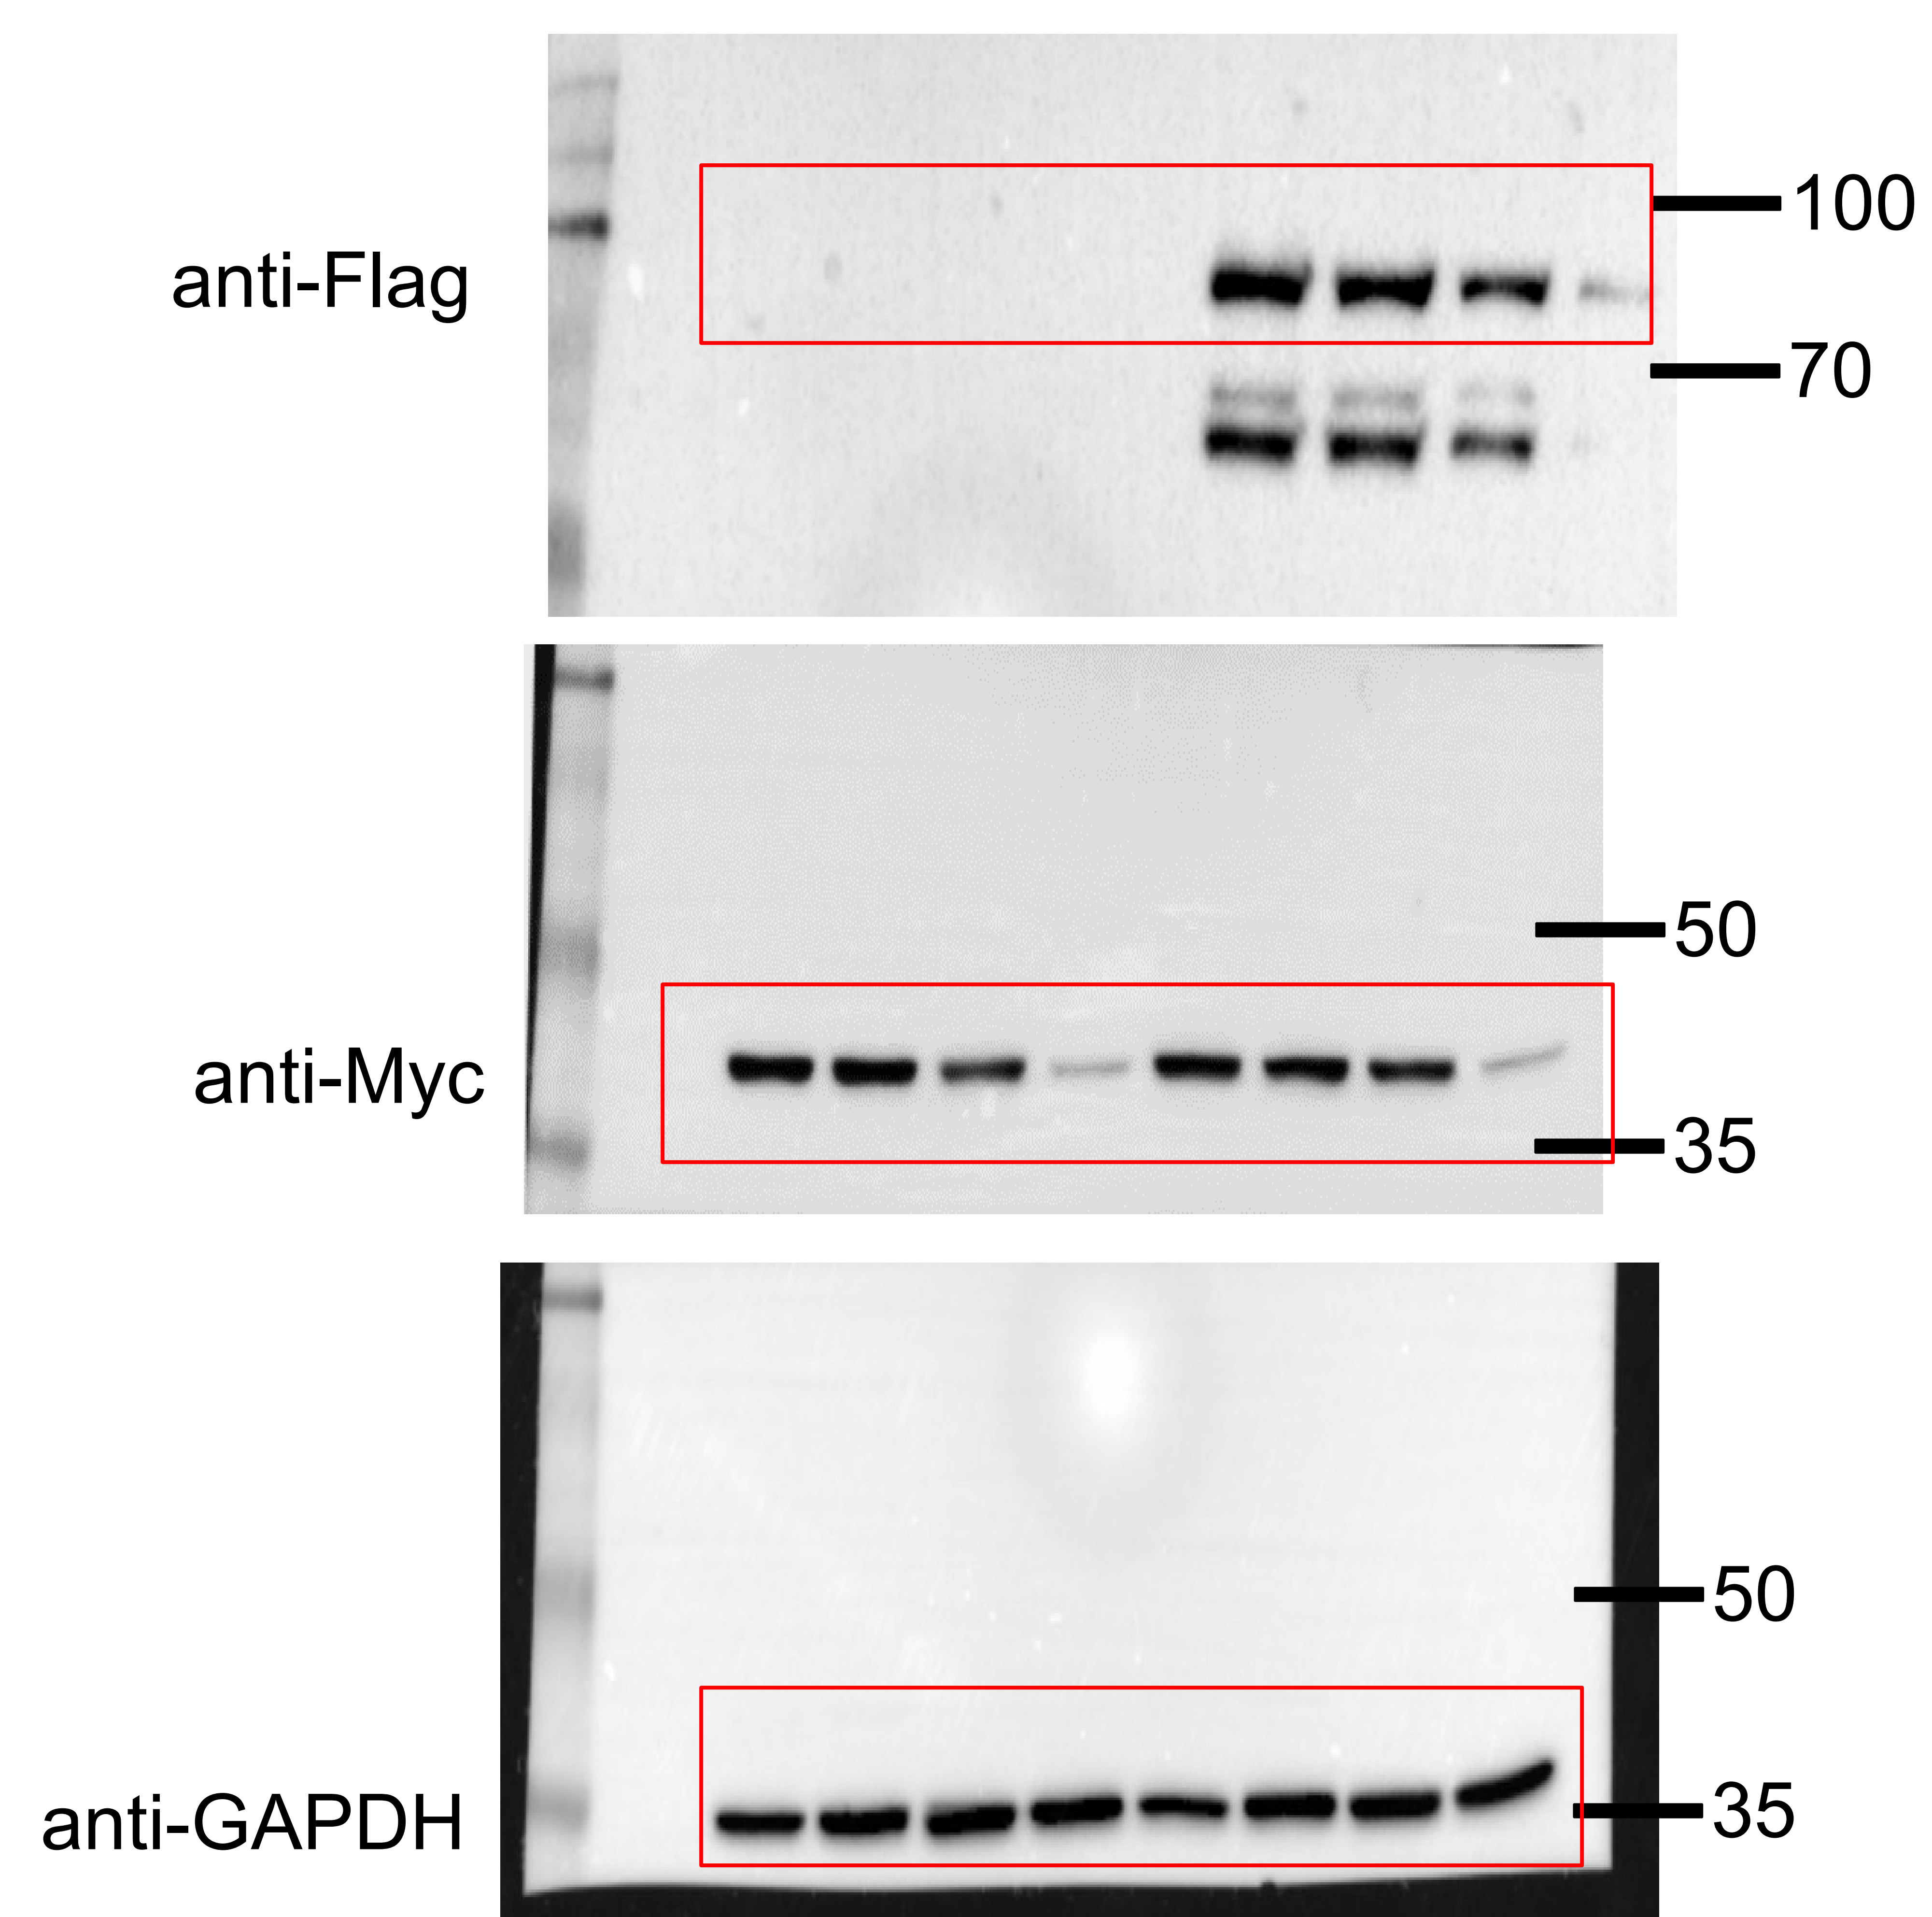

## D

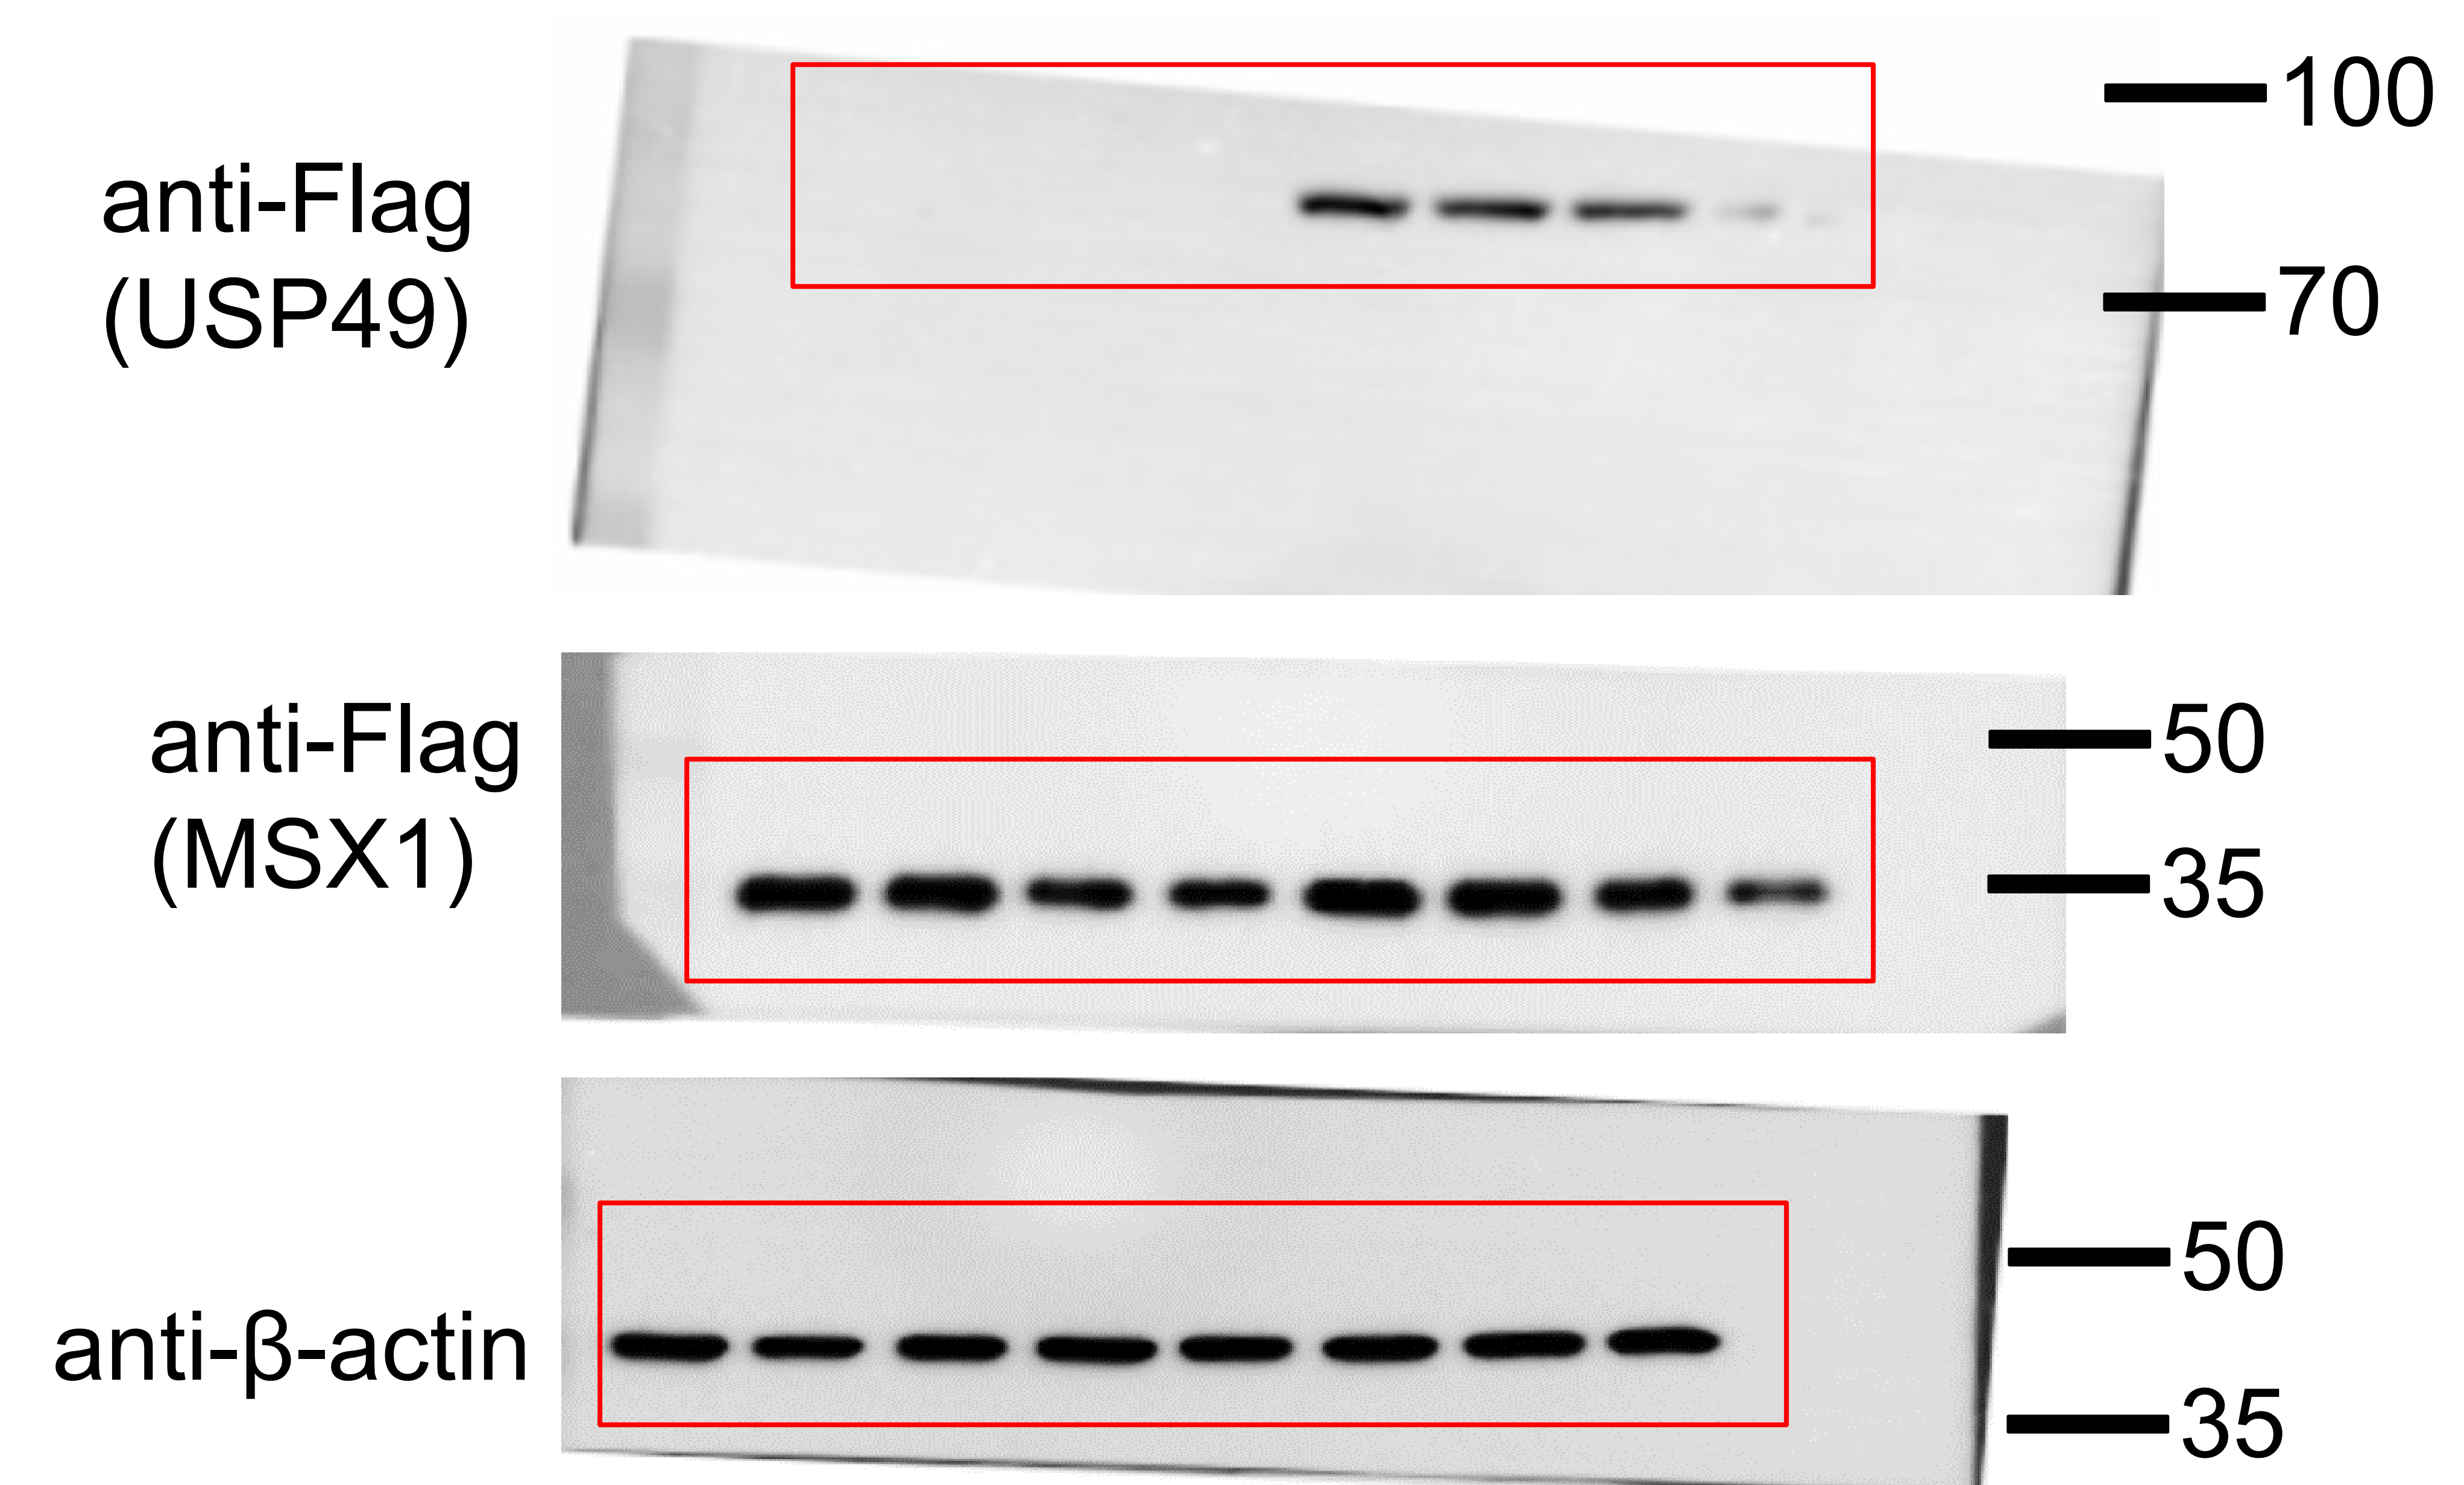

# Uncropped blots of Supplementary Fig. S8

**A**

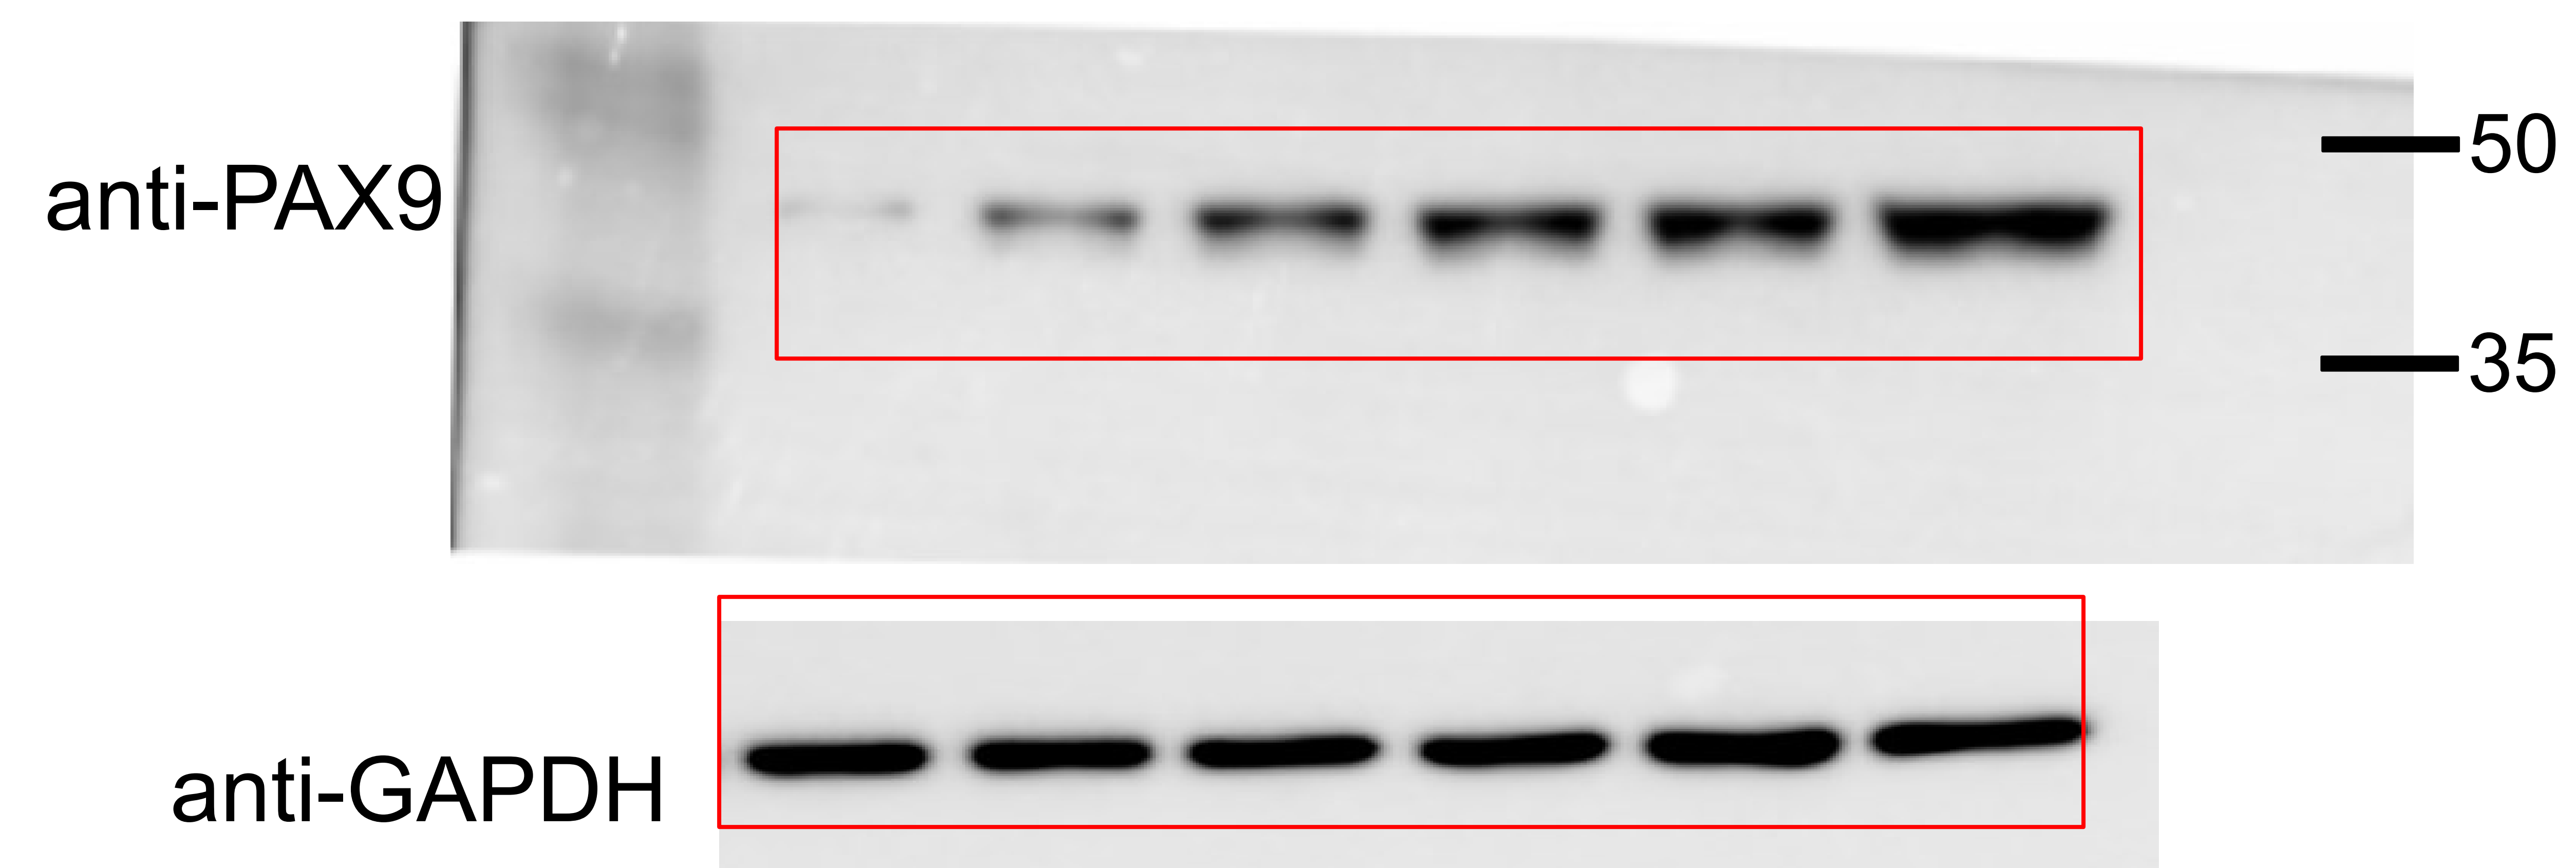

**B**

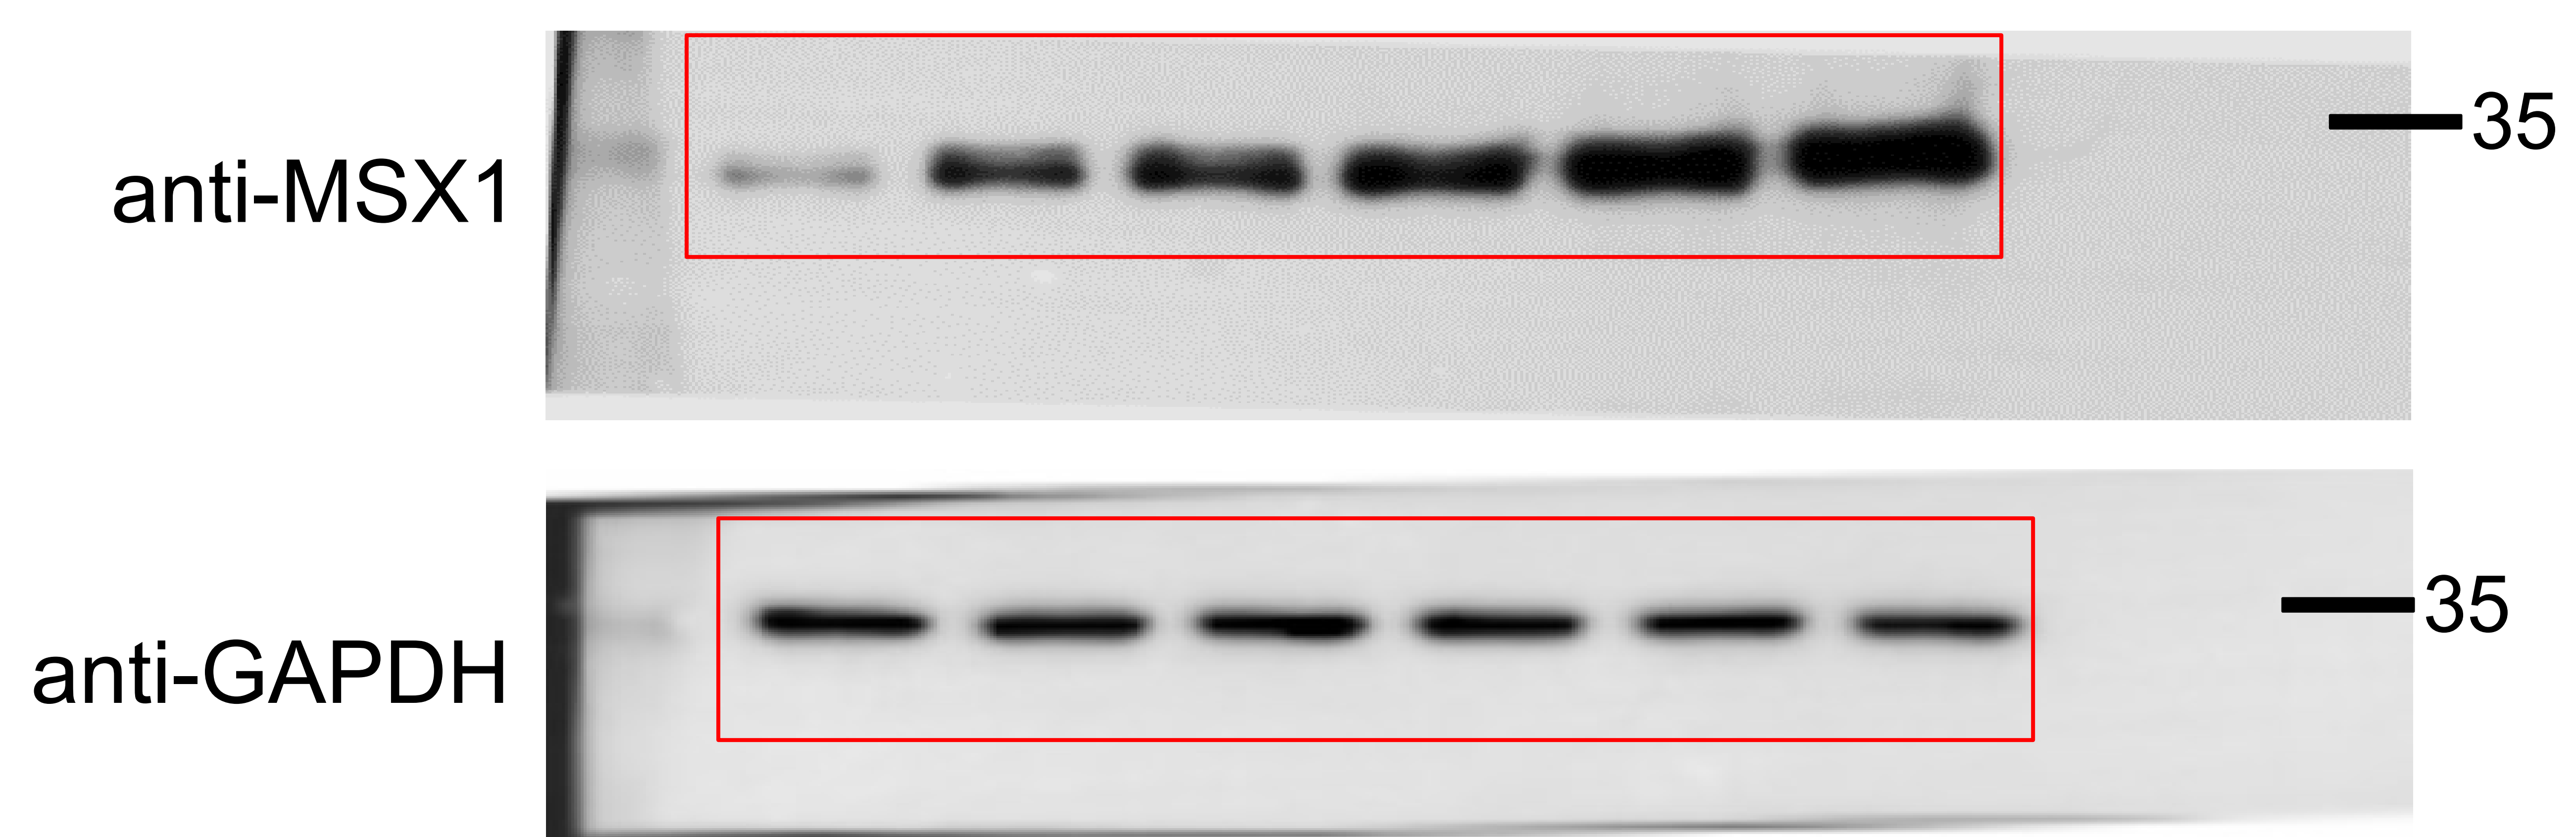

**C**

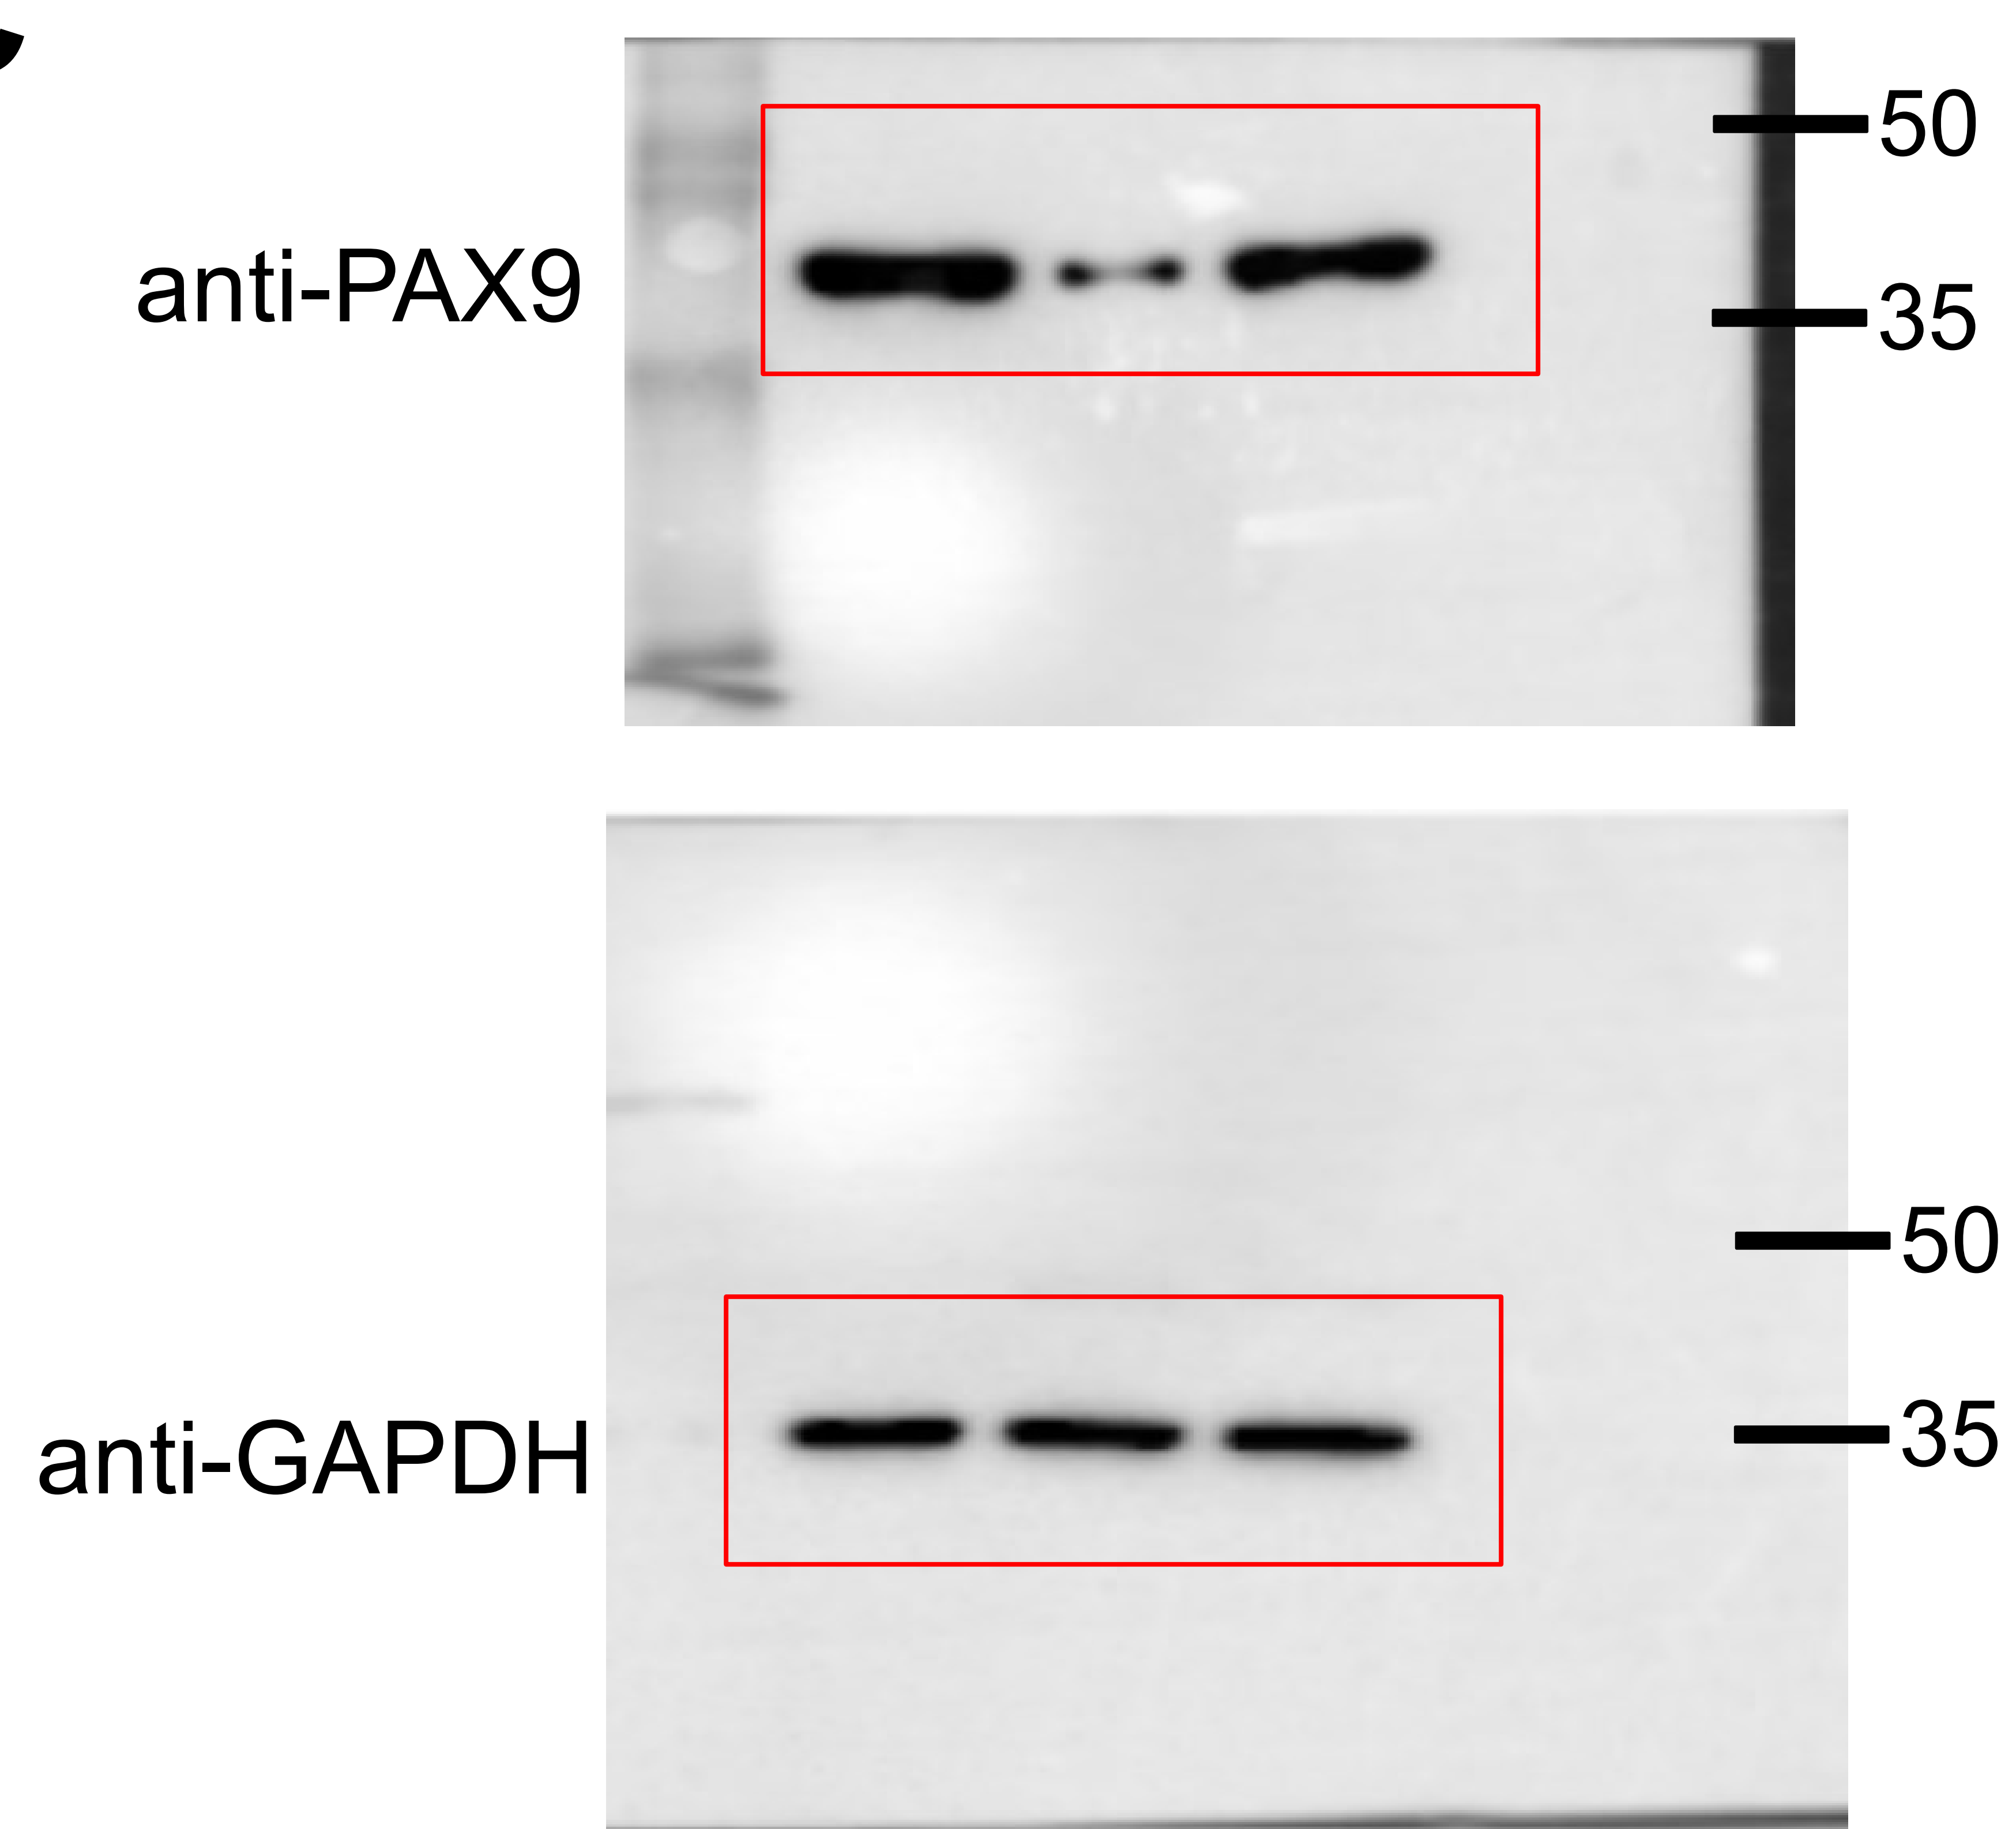

**D**

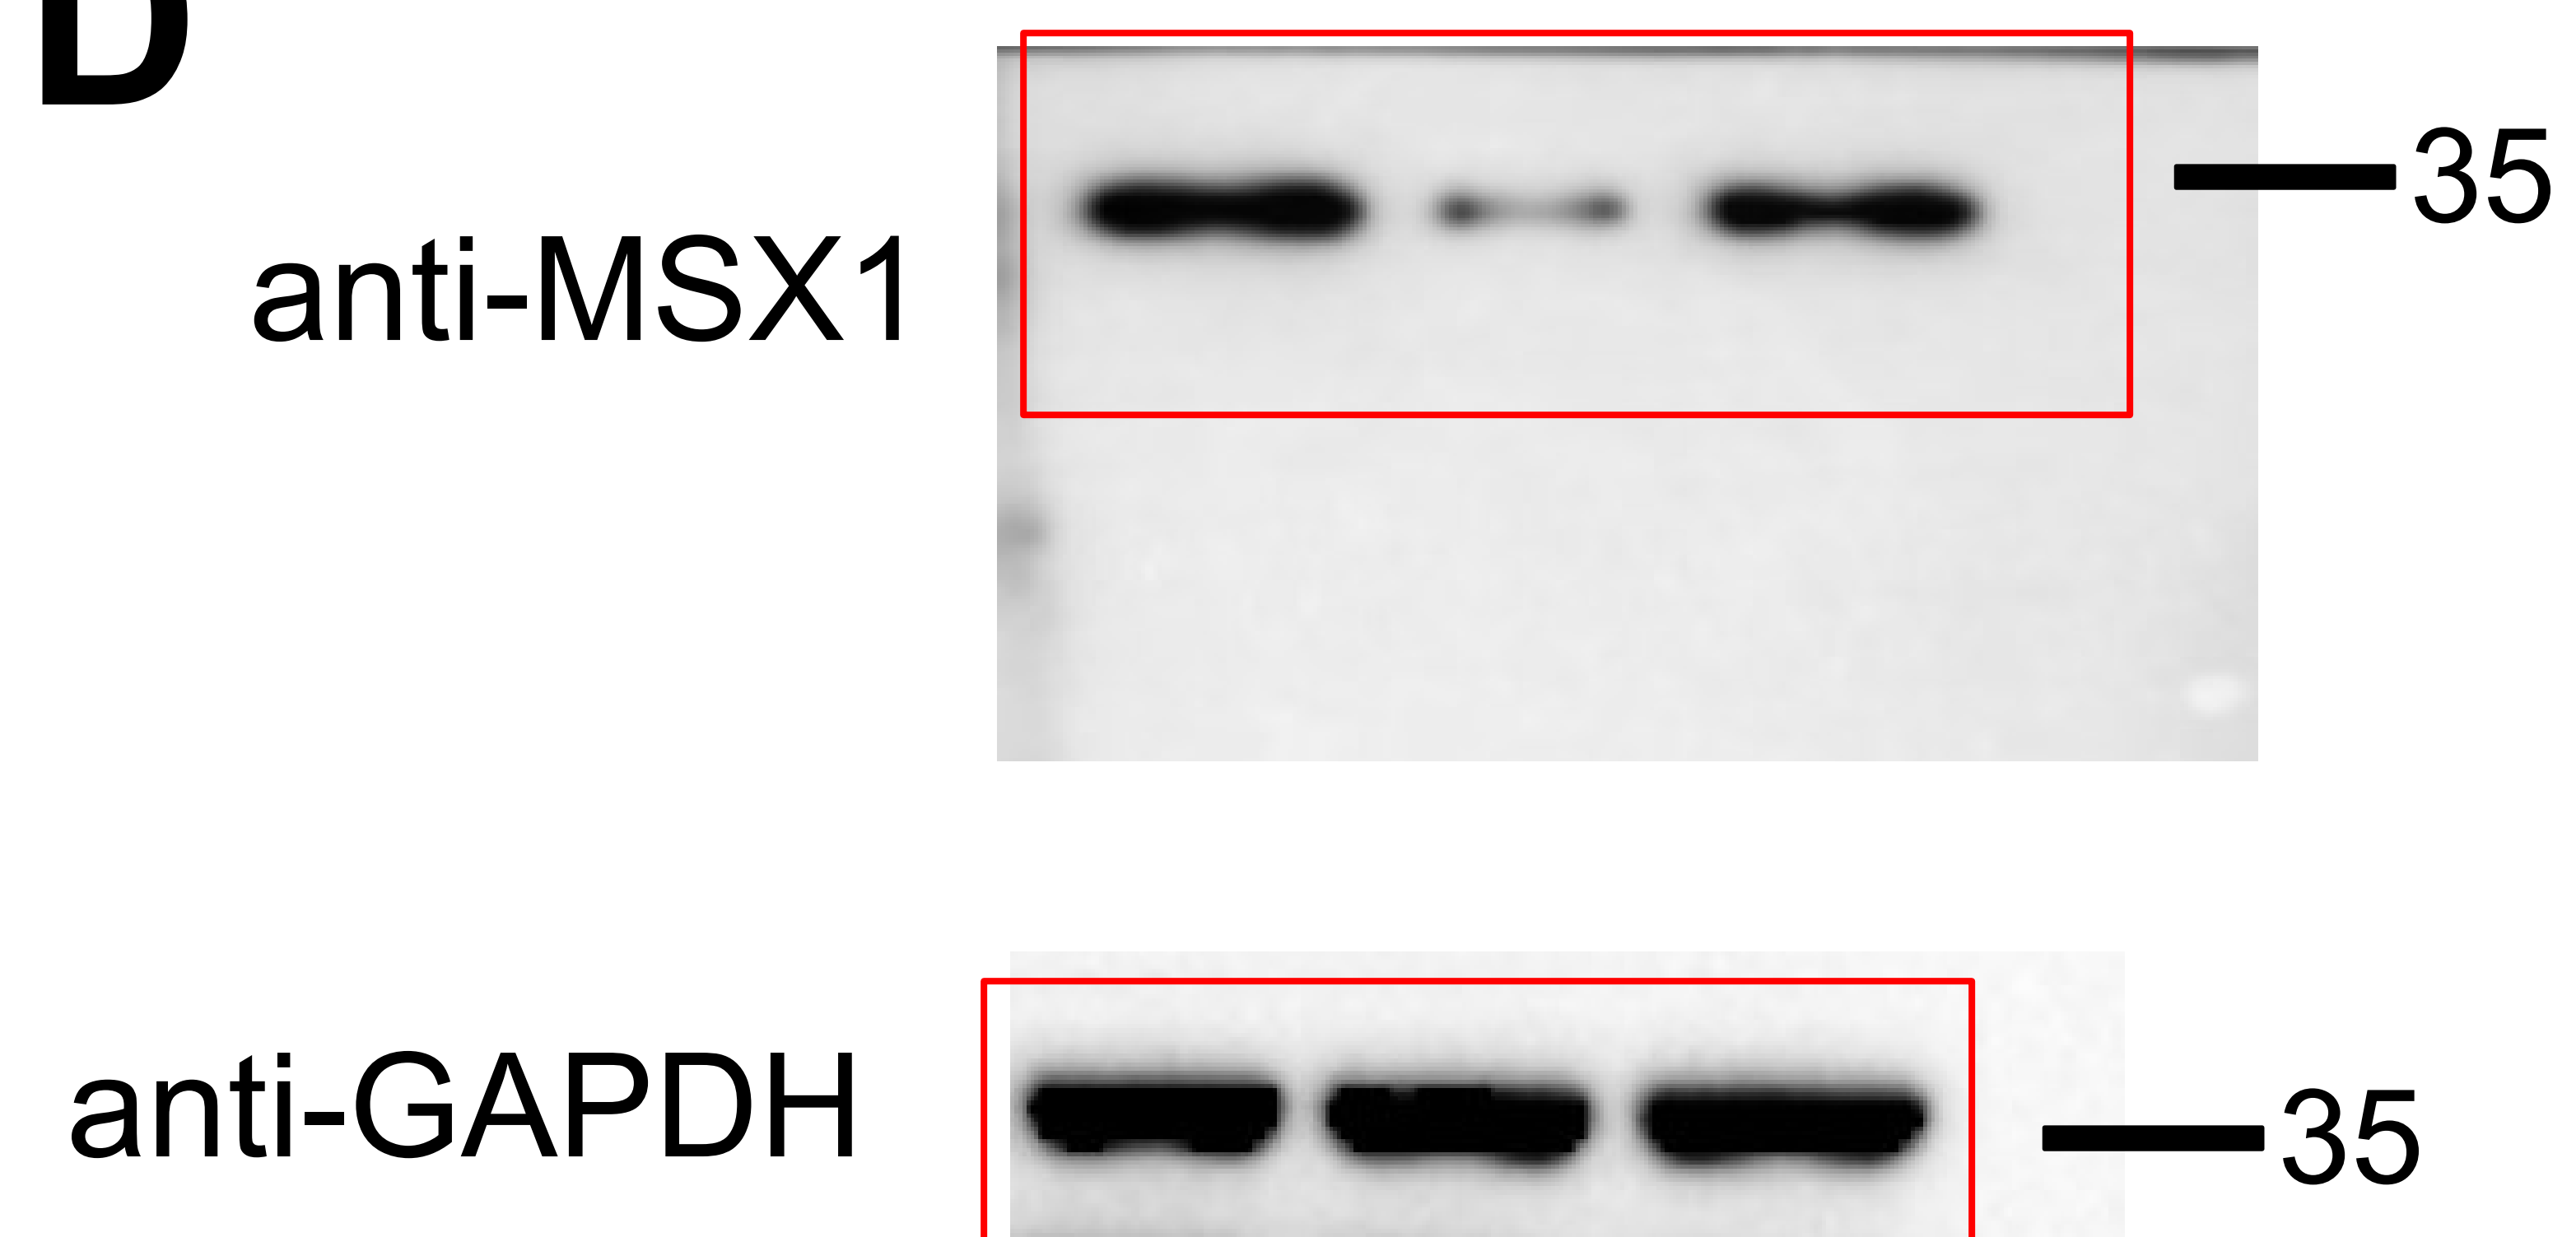



# Uncropped blots of Supplementary Fig. S8

**E**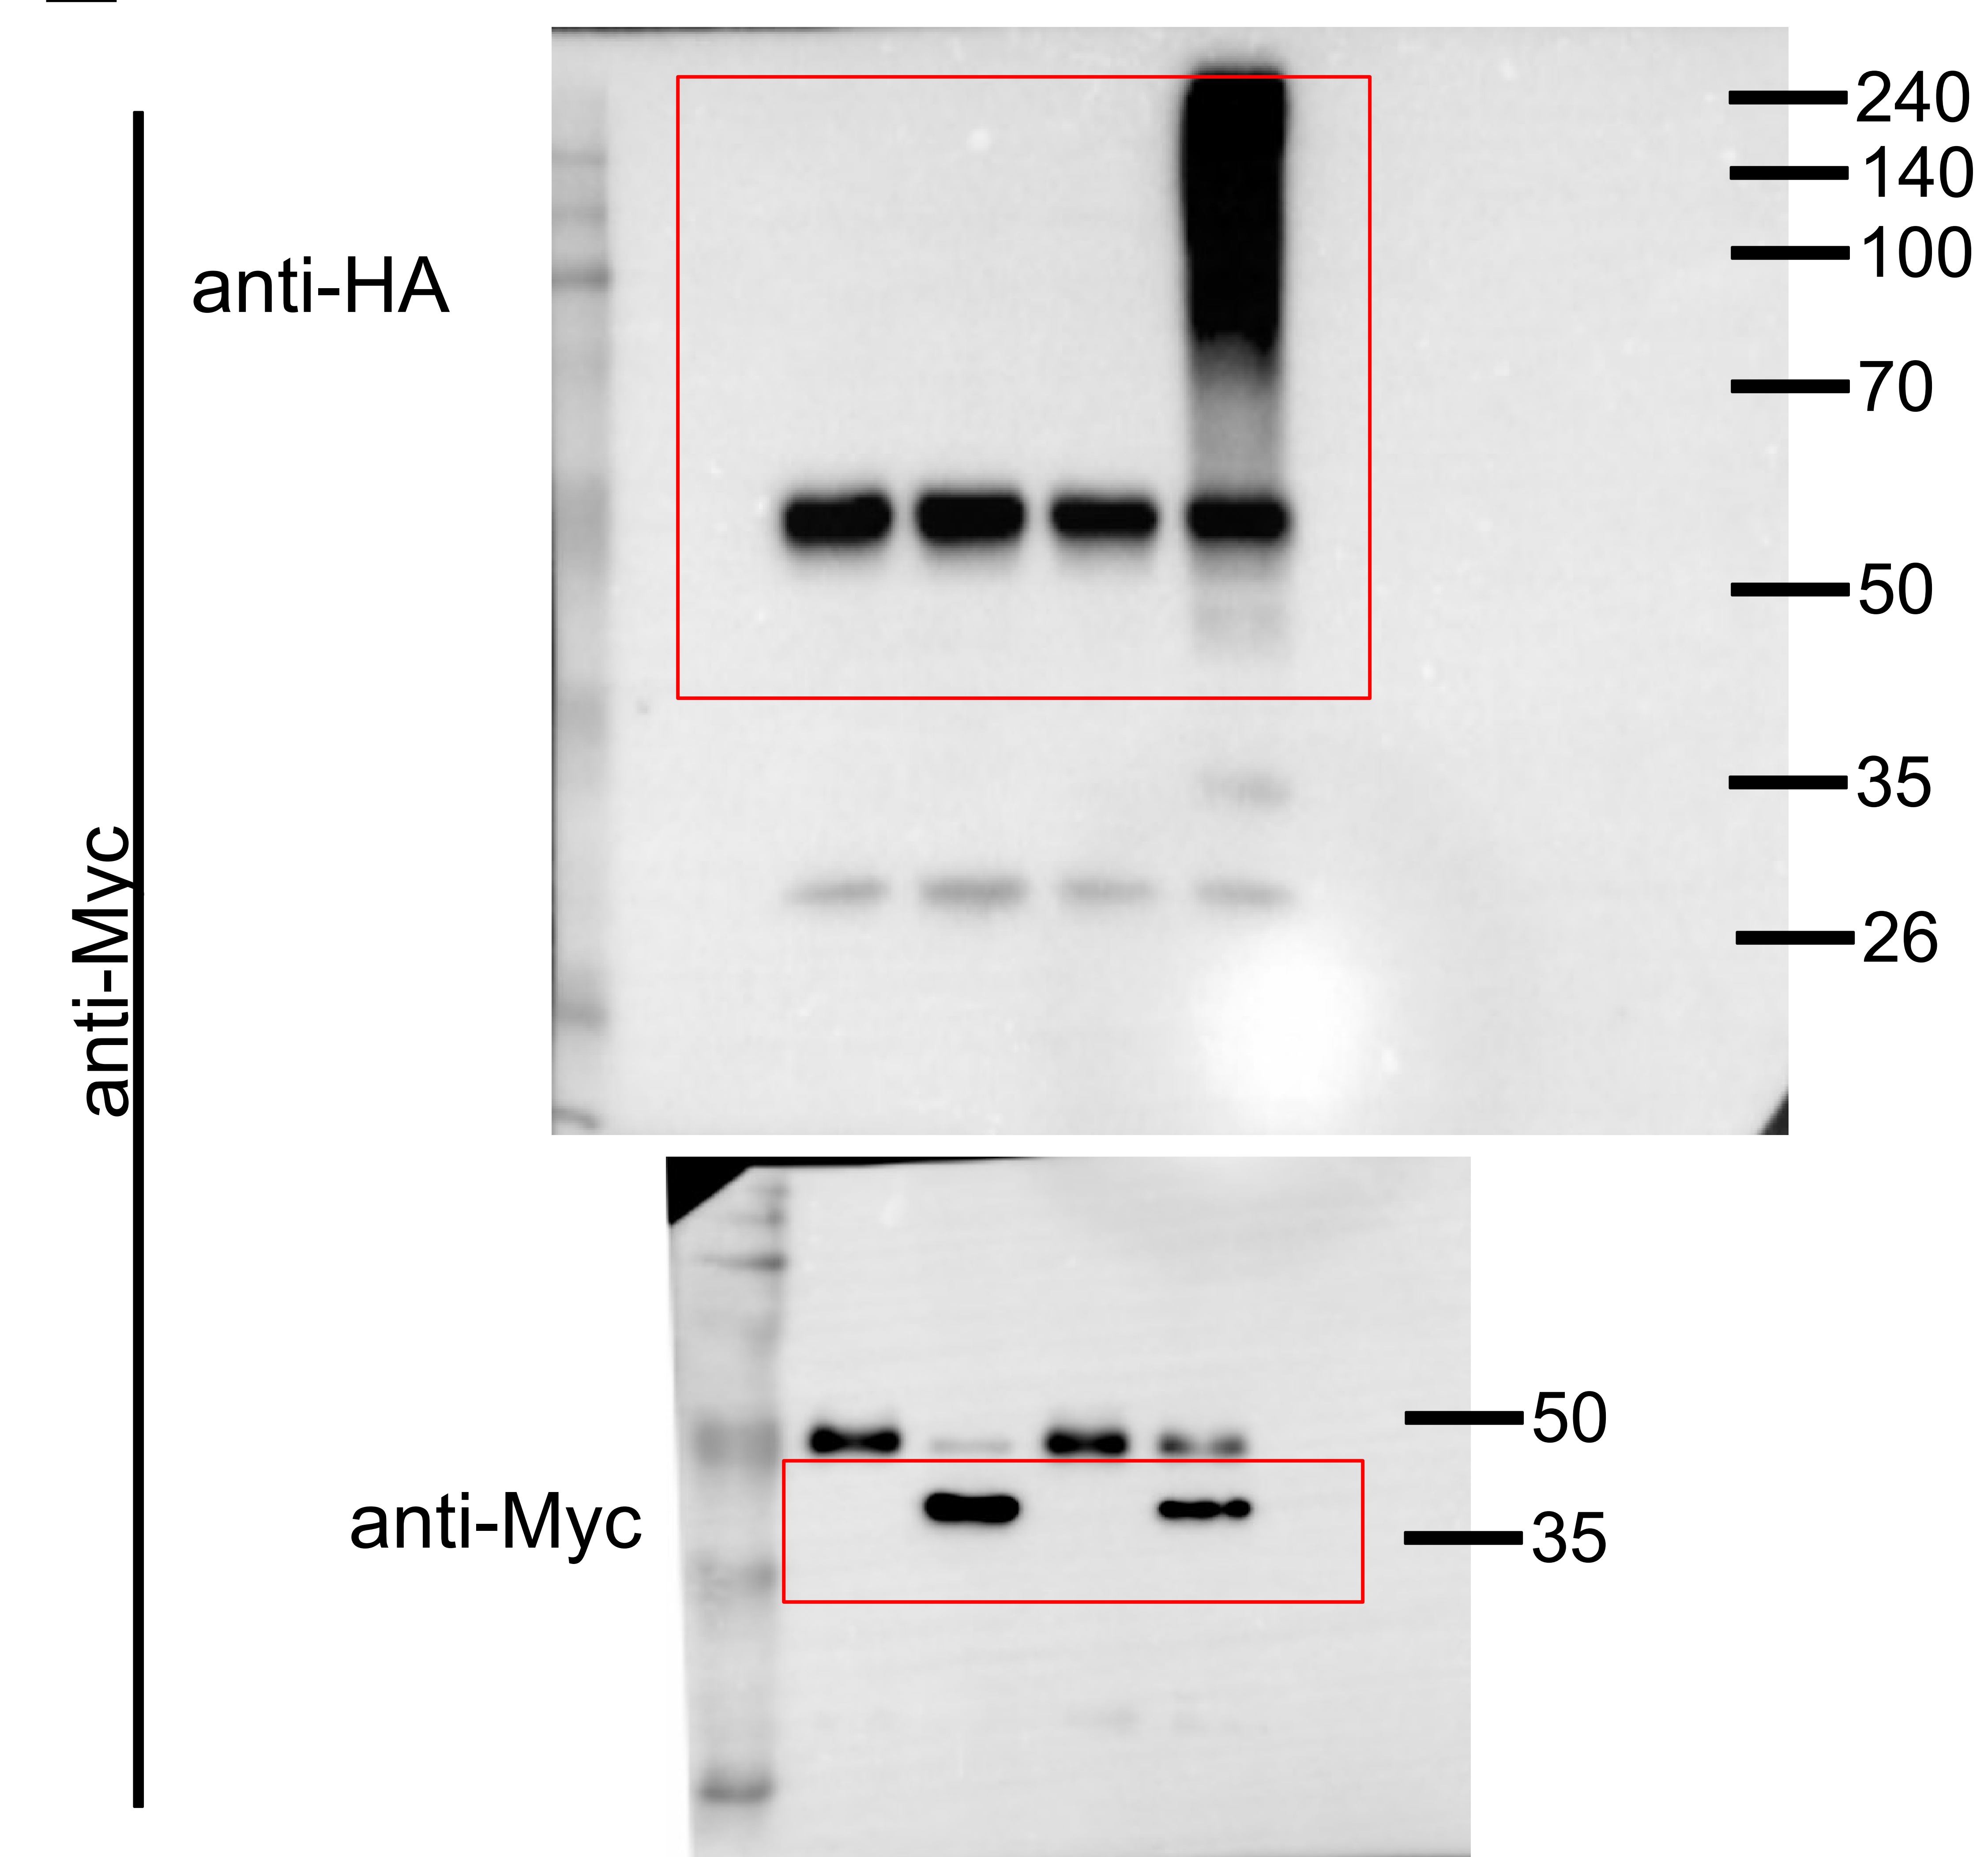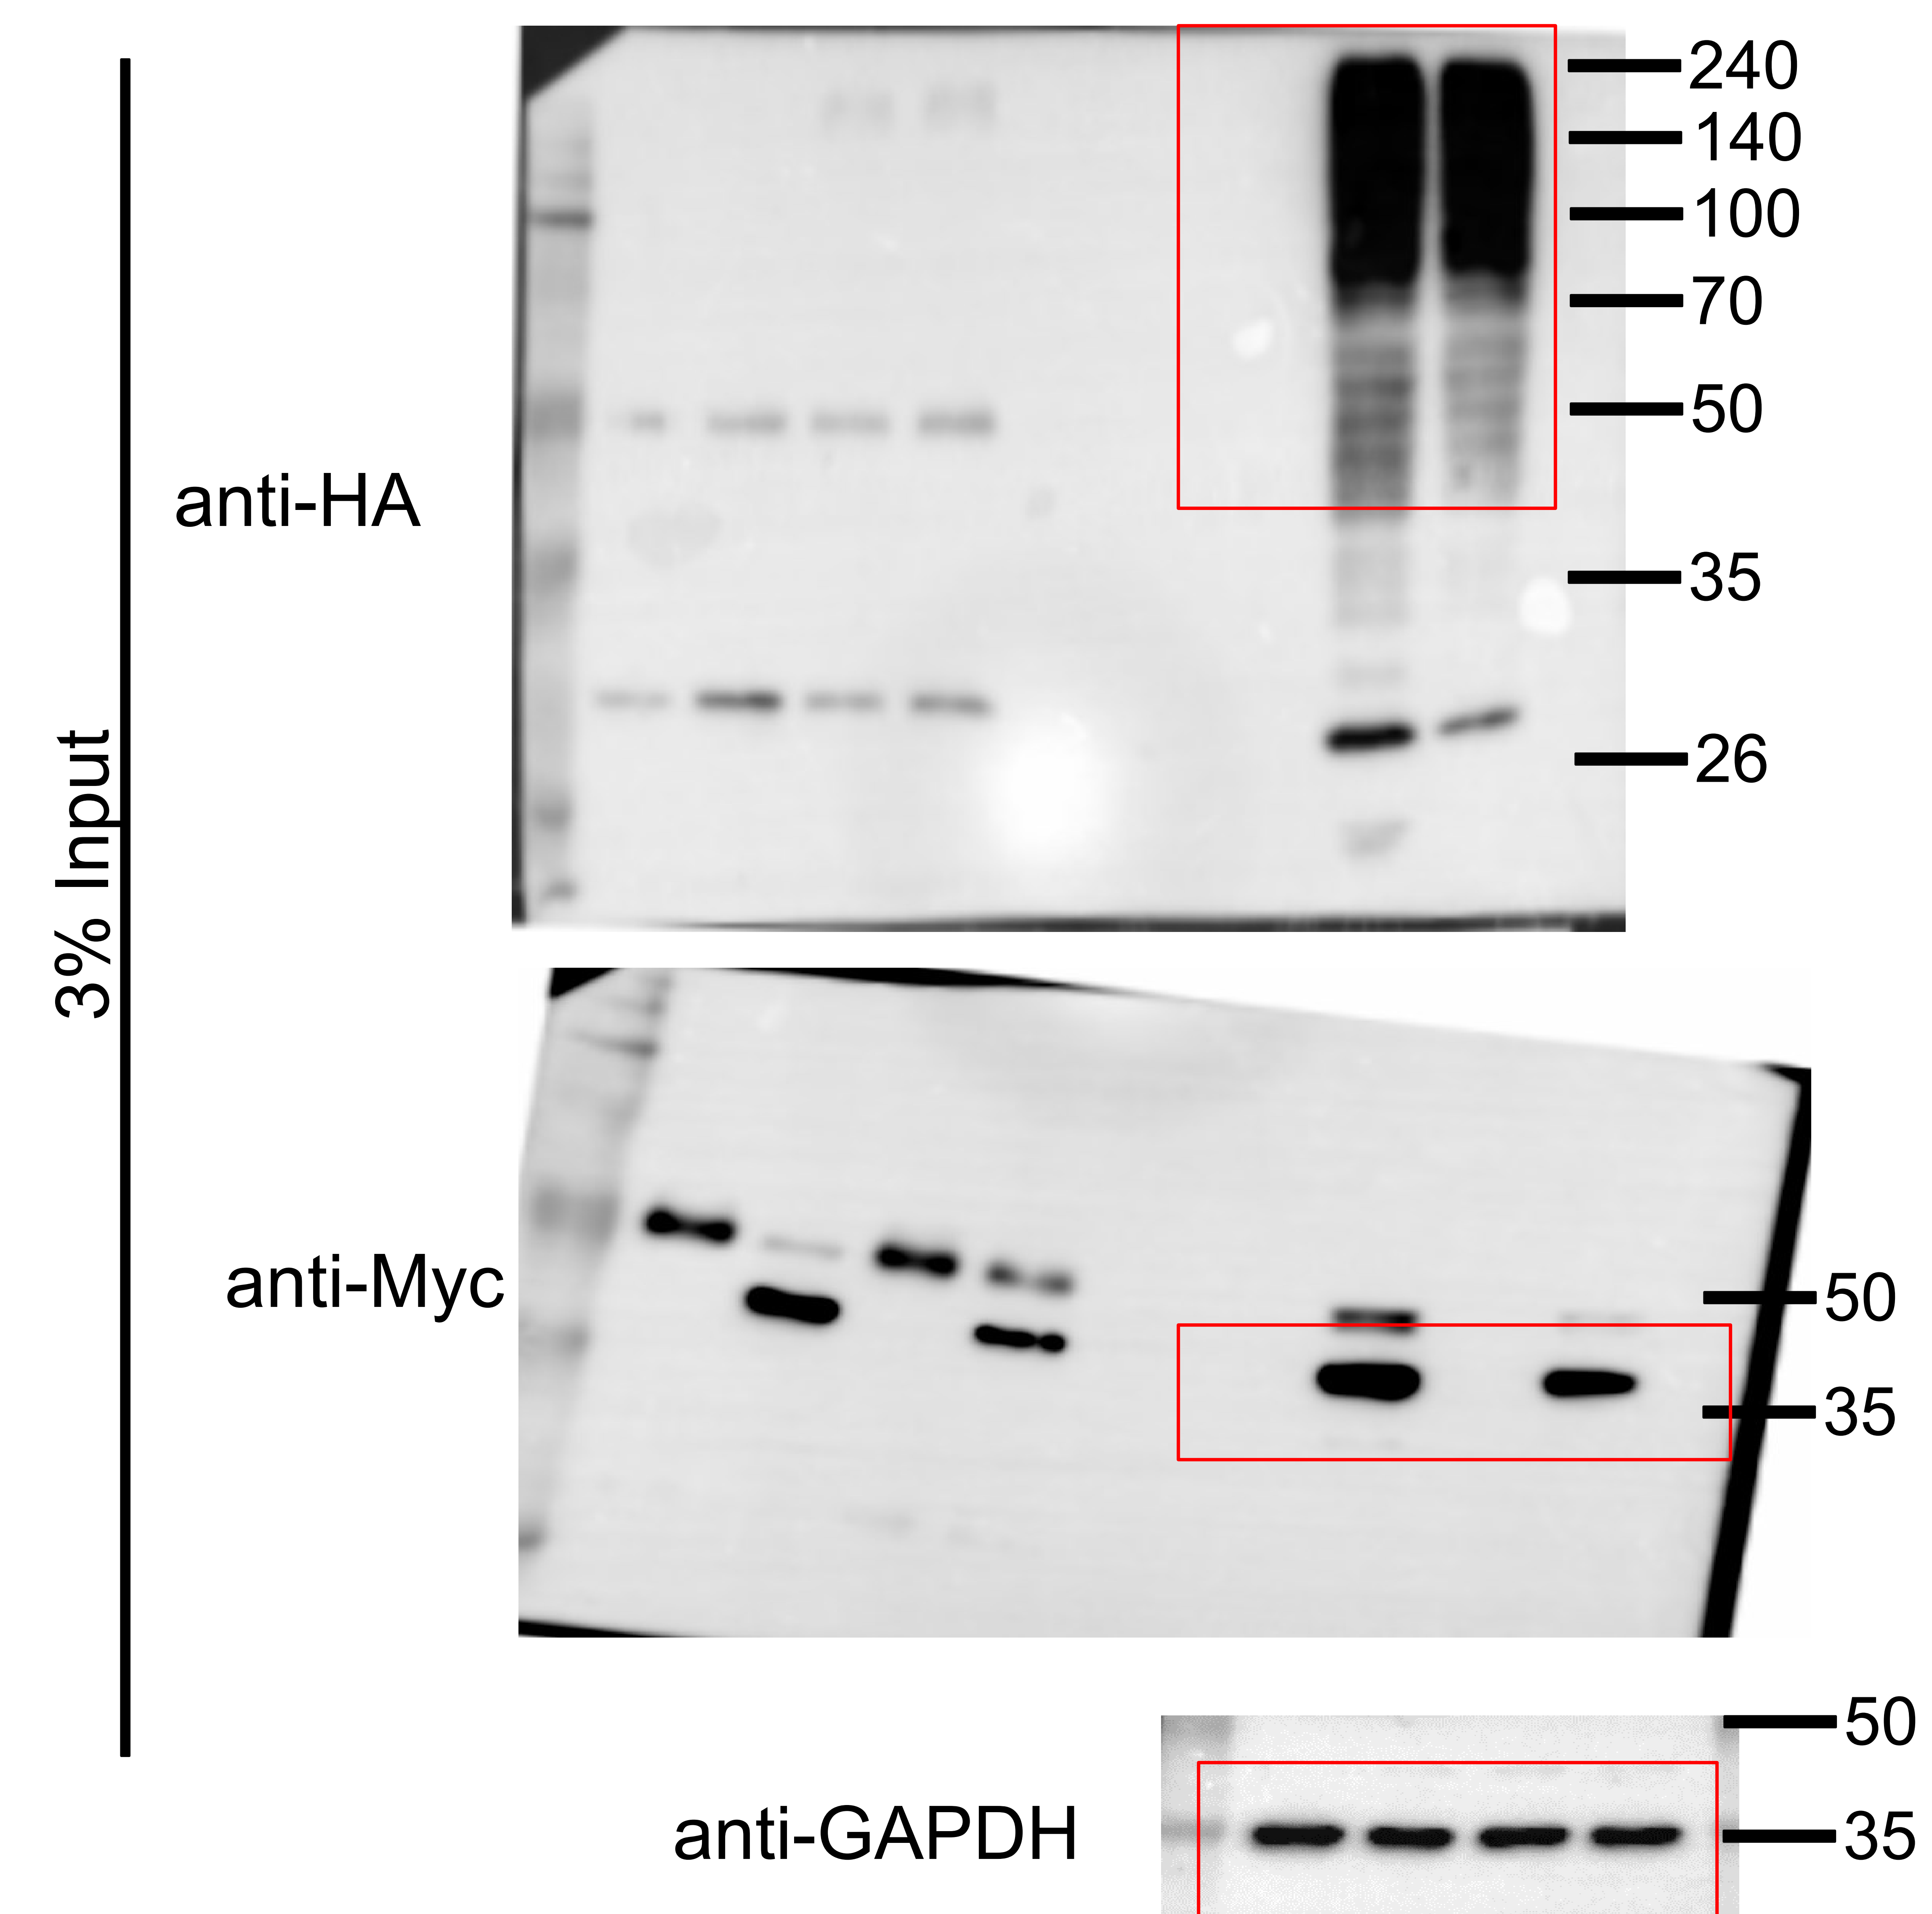**F**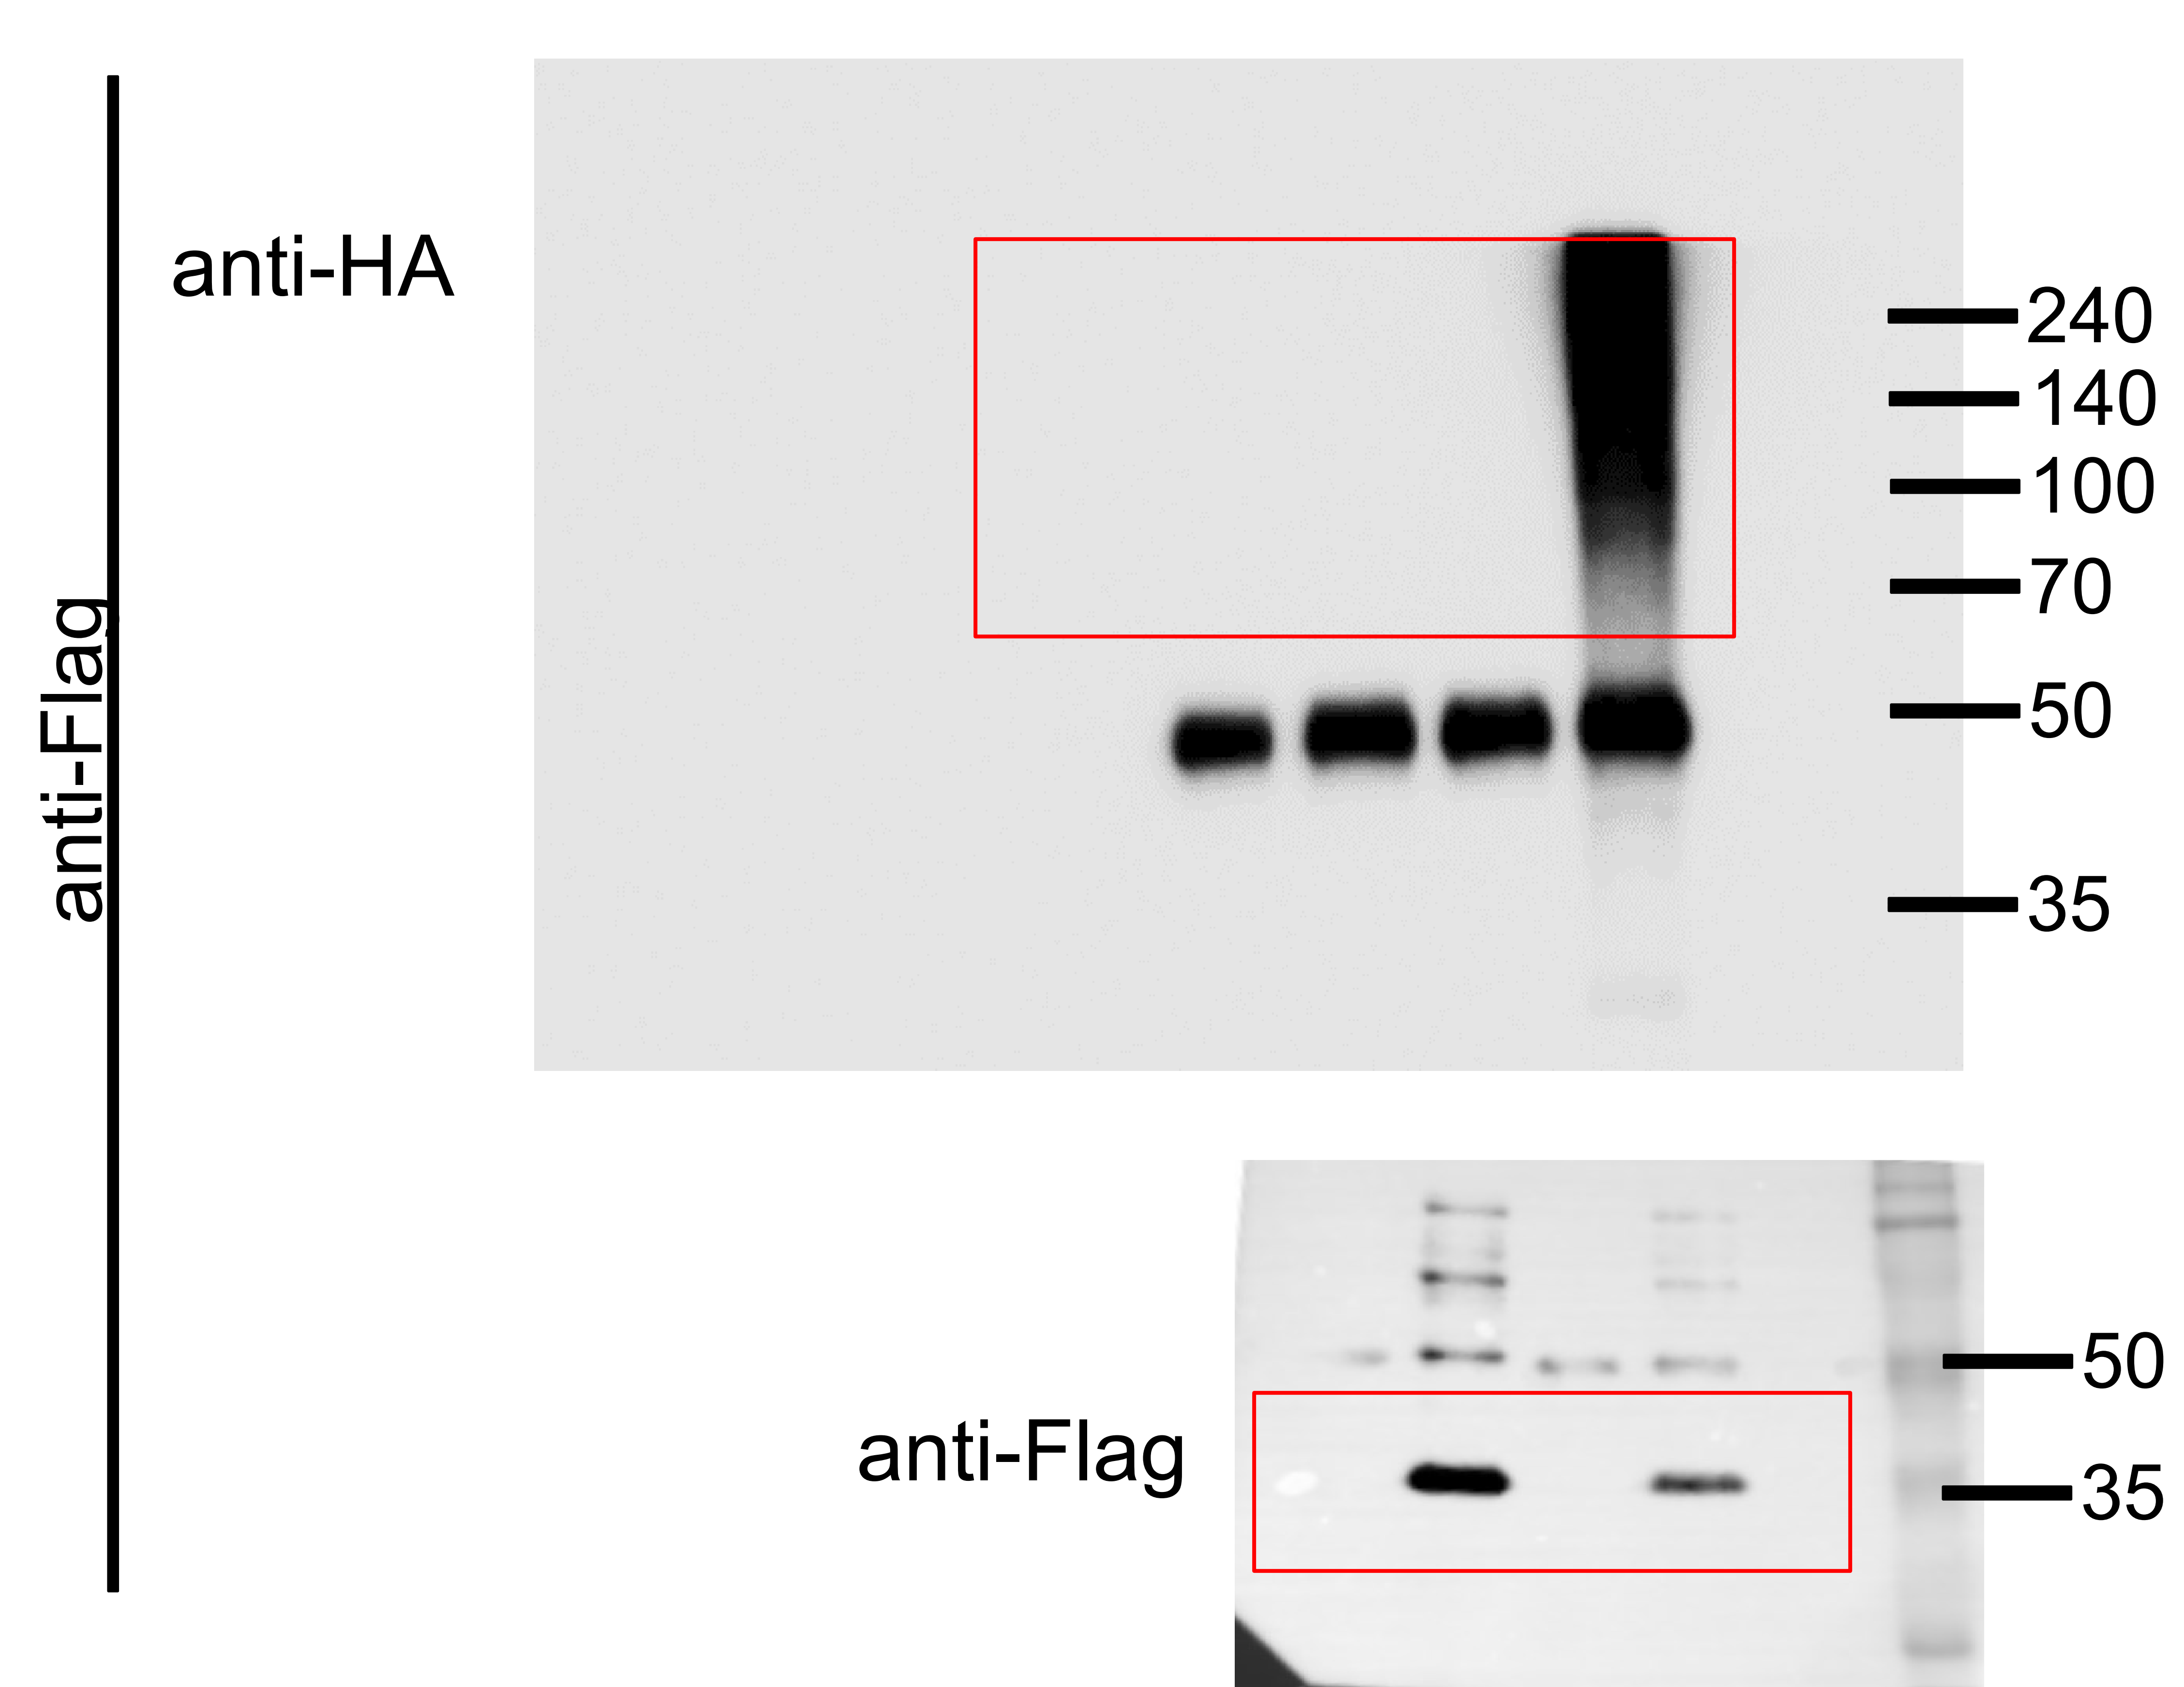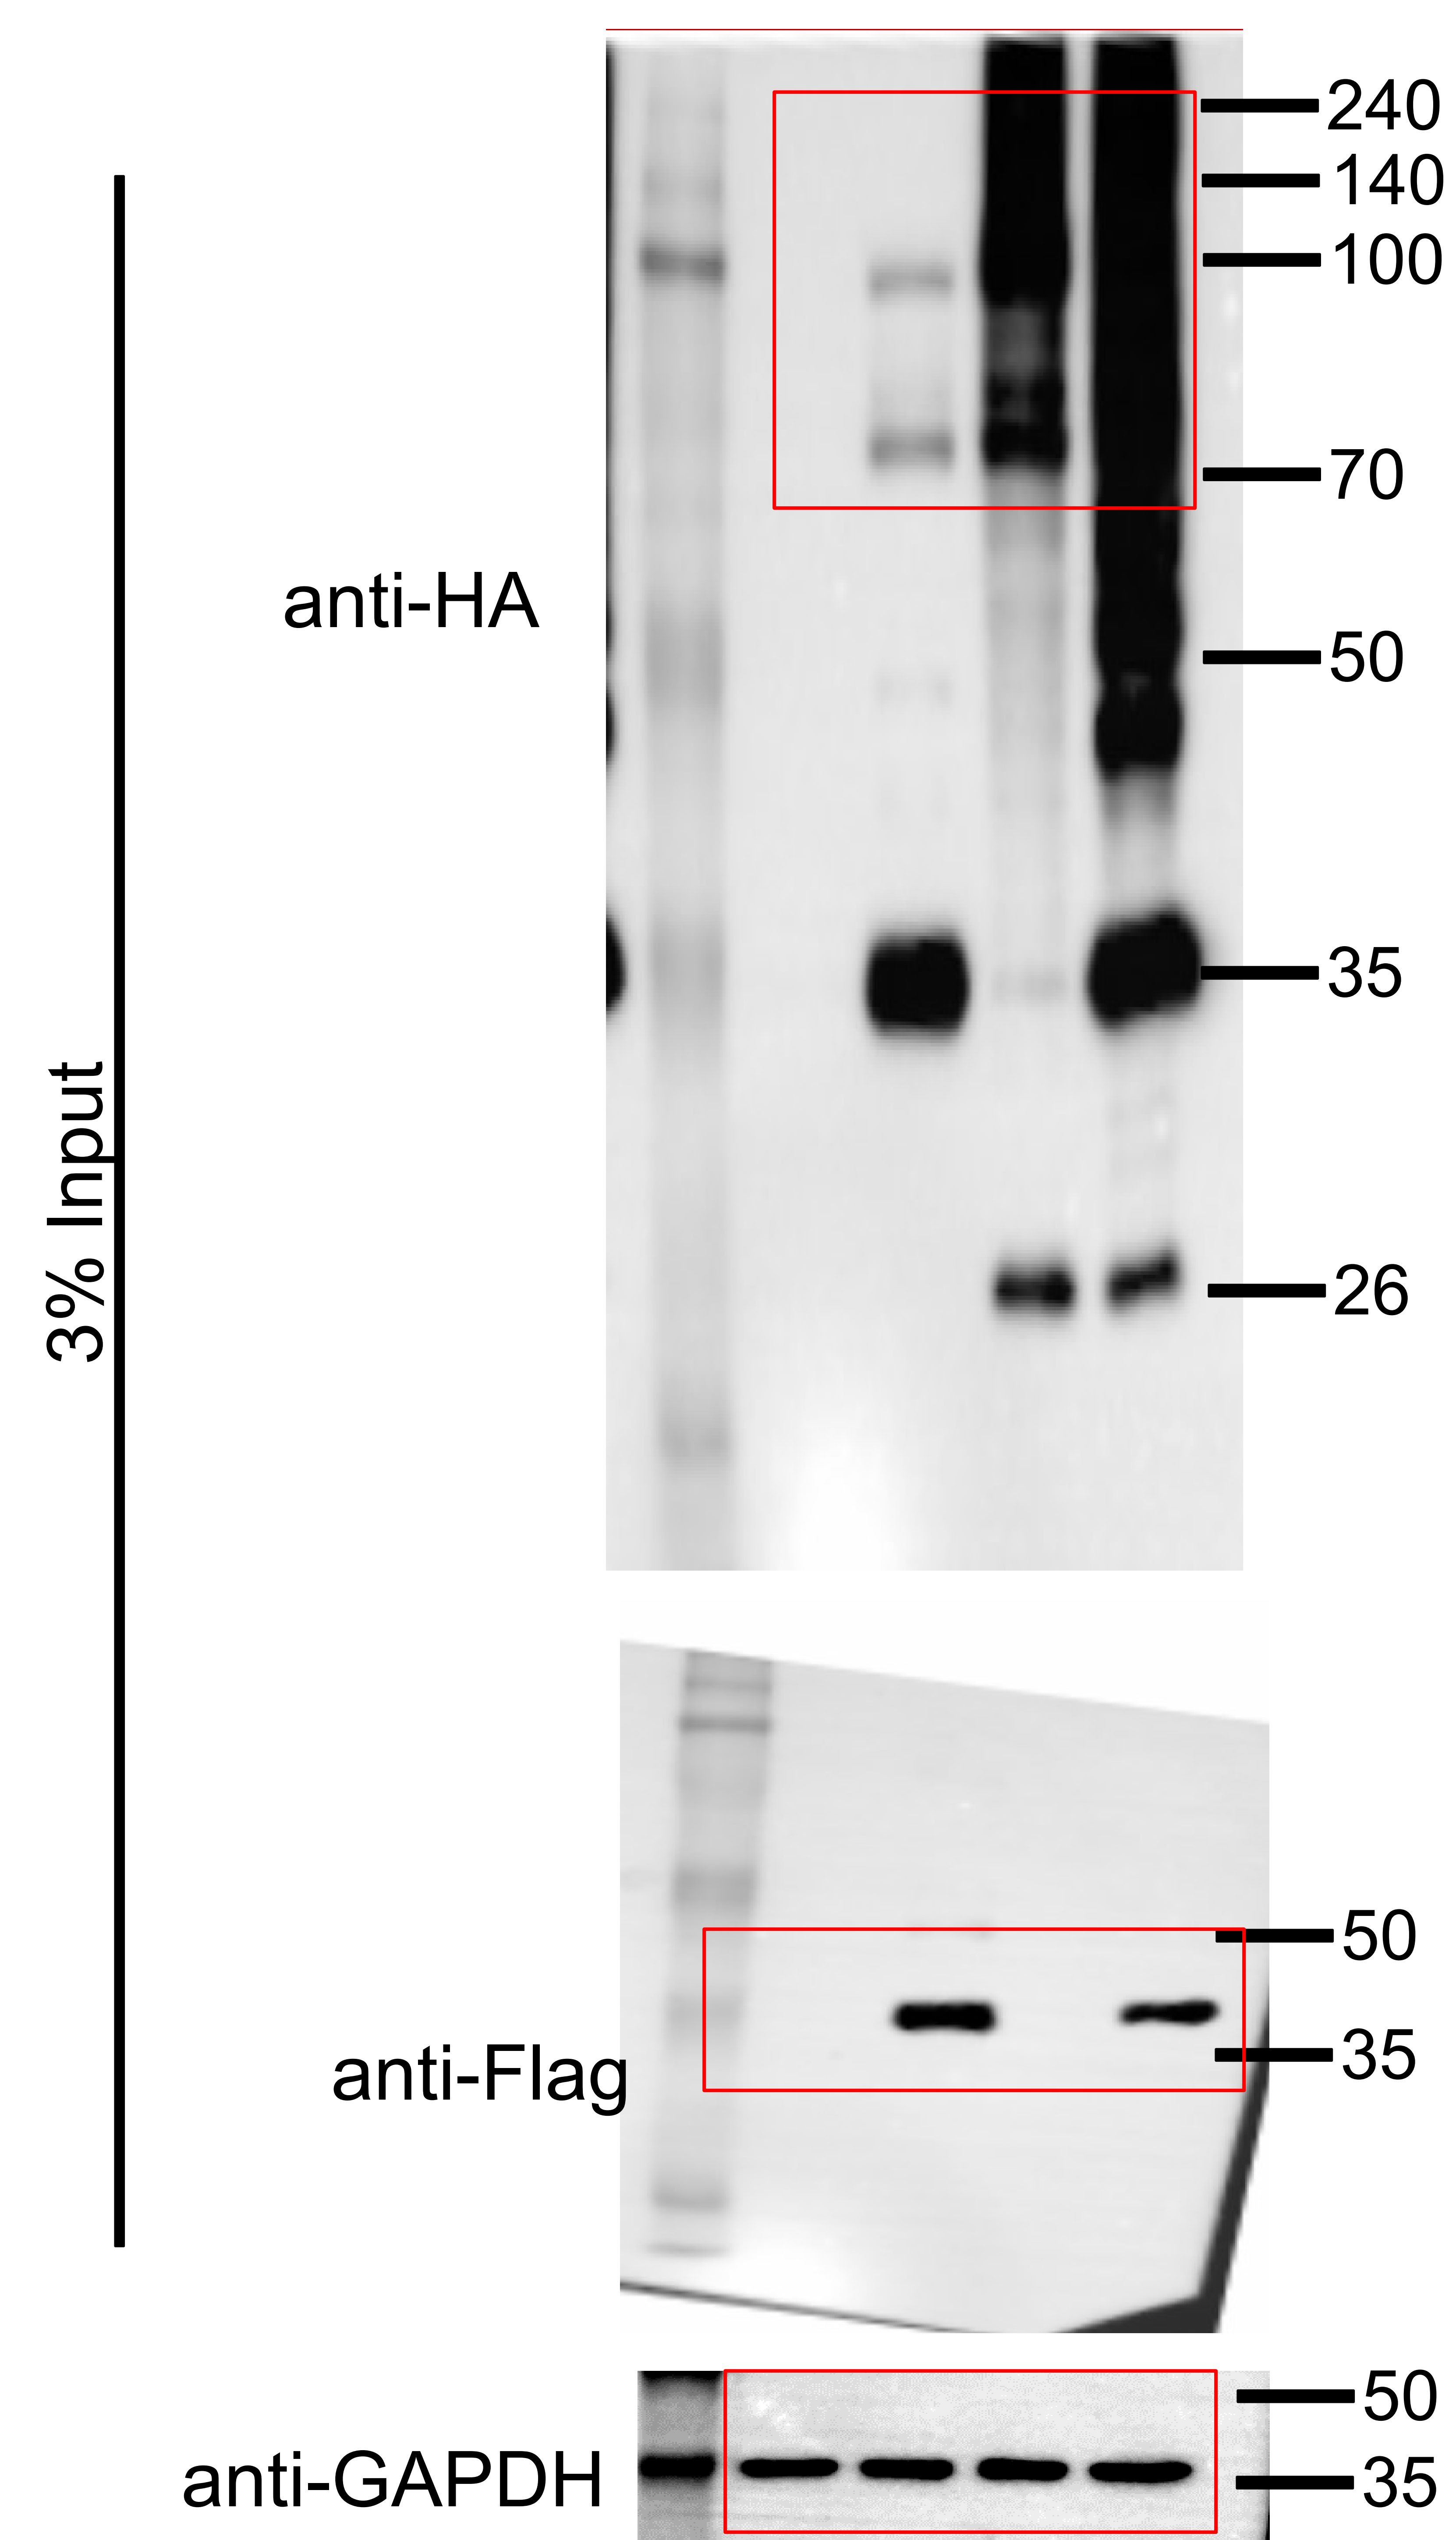

# Uncropped blots of Supplementary Fig. S9

## A

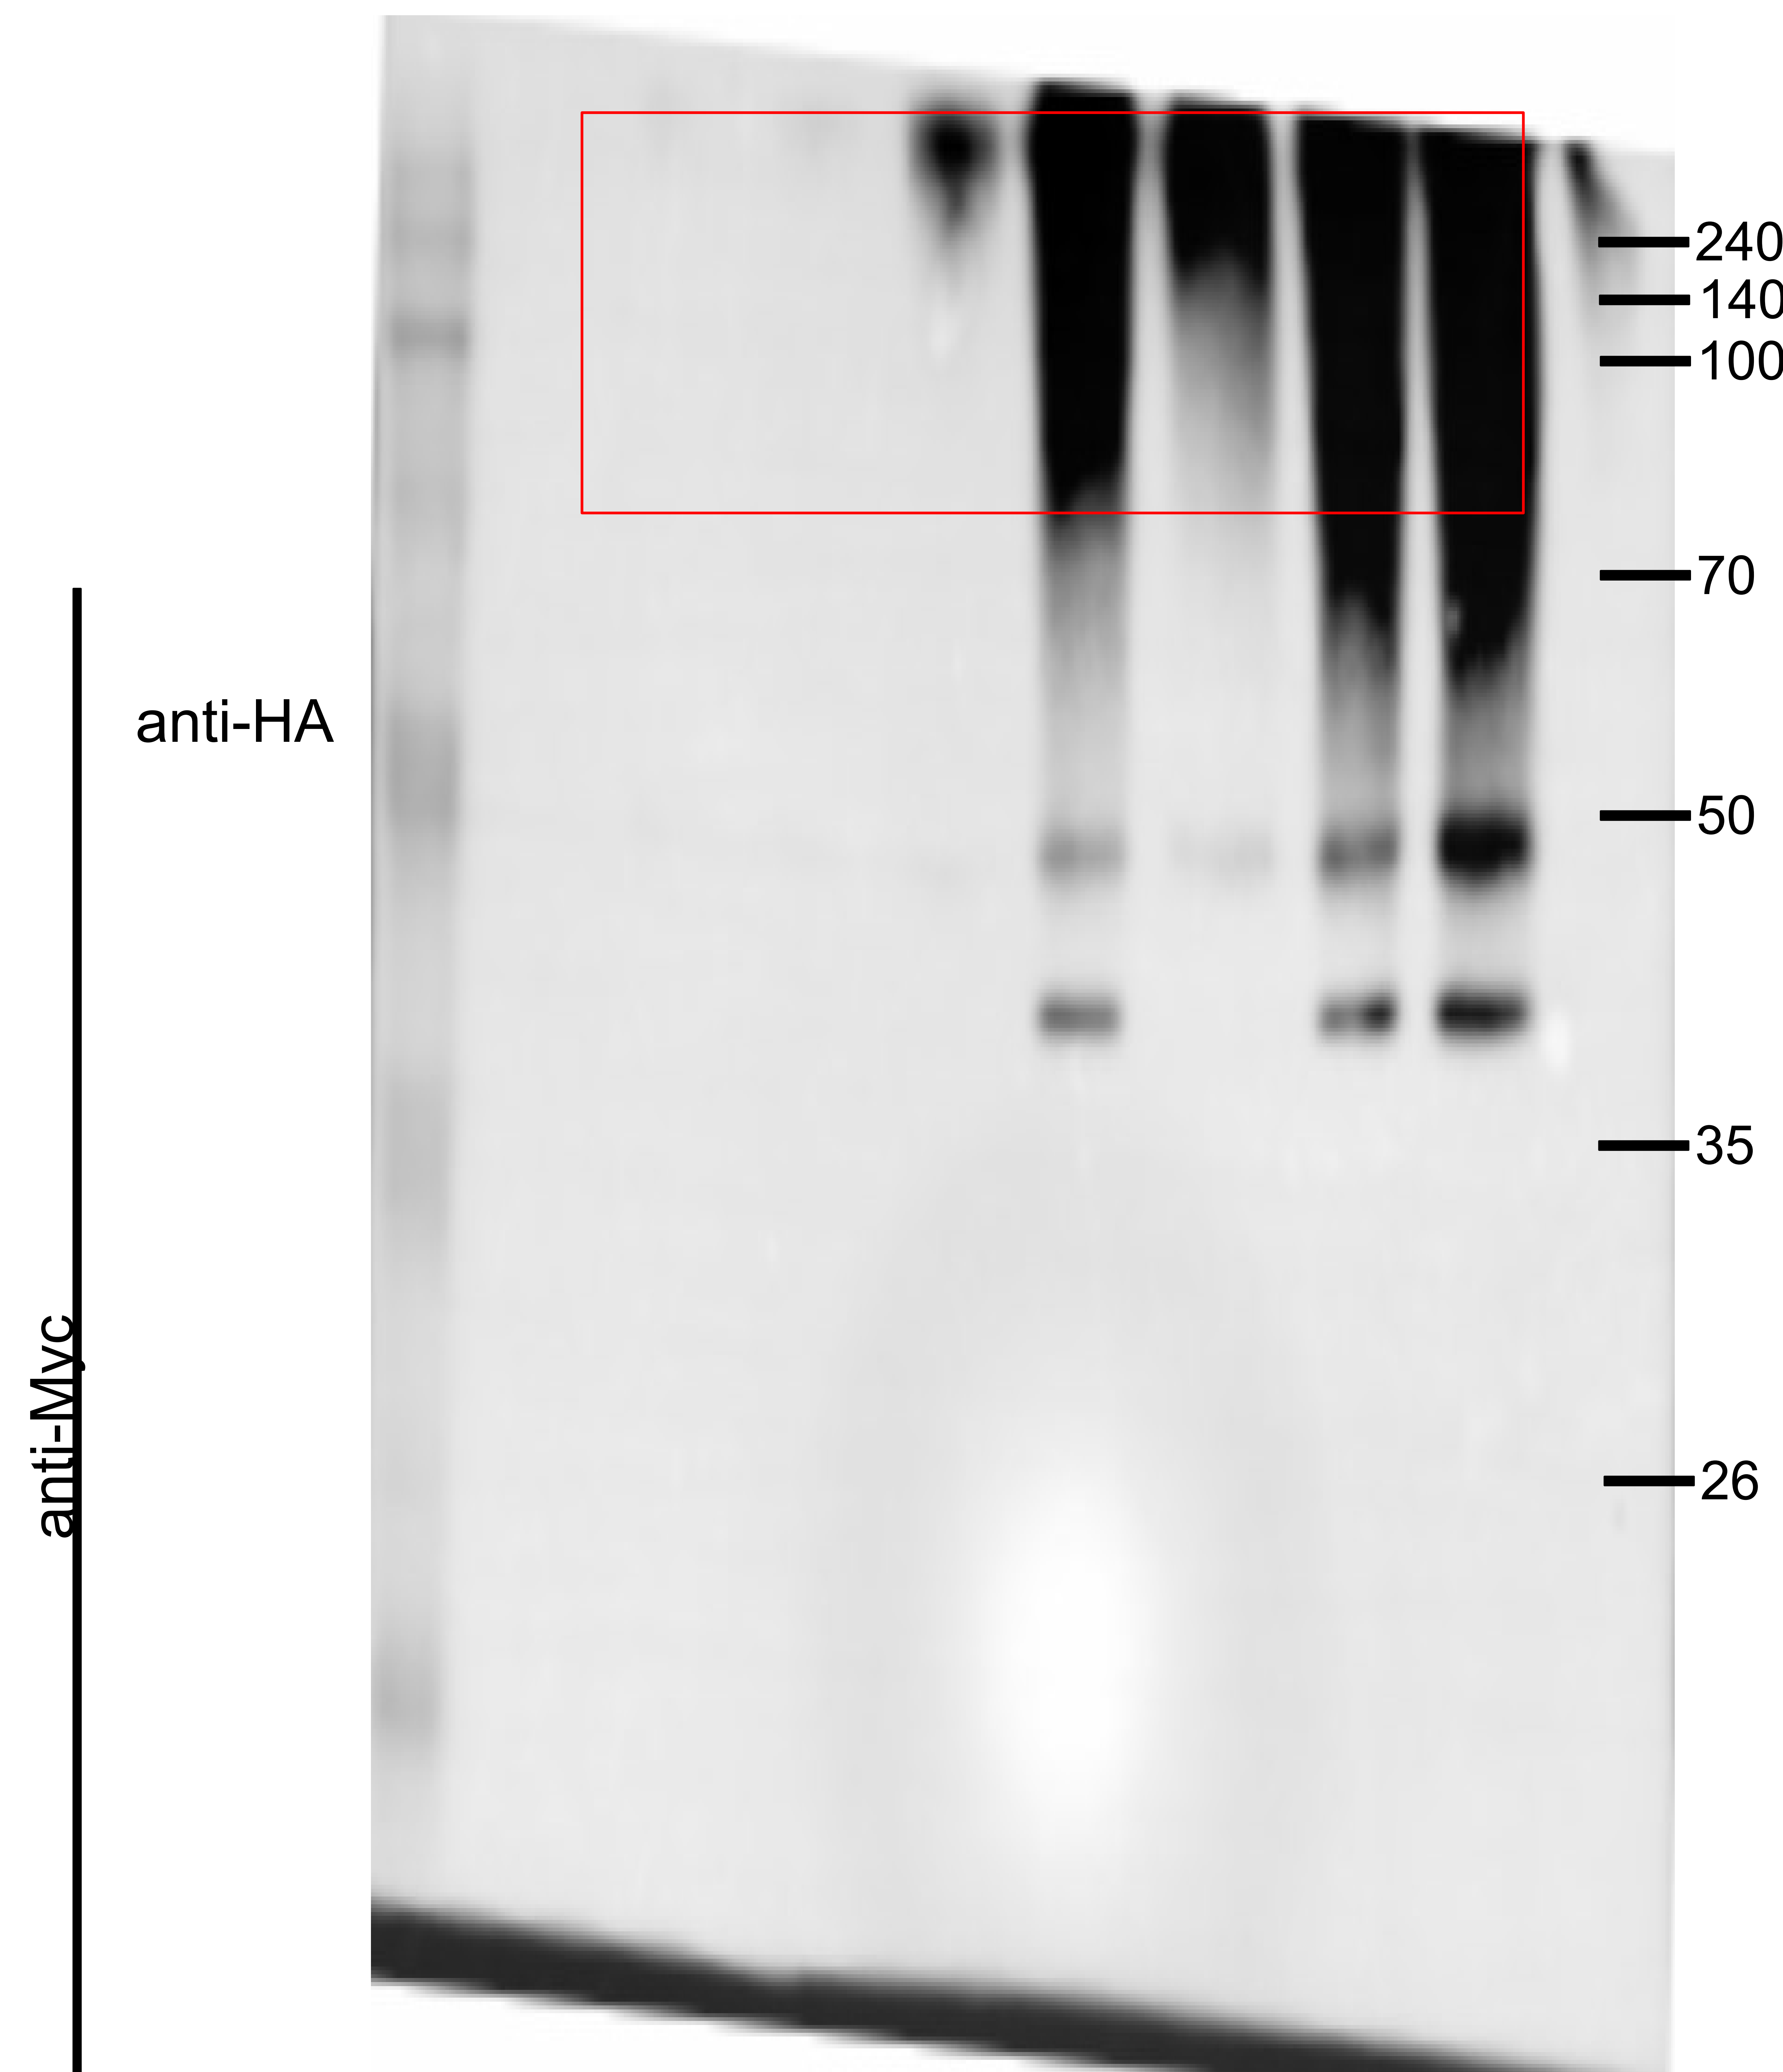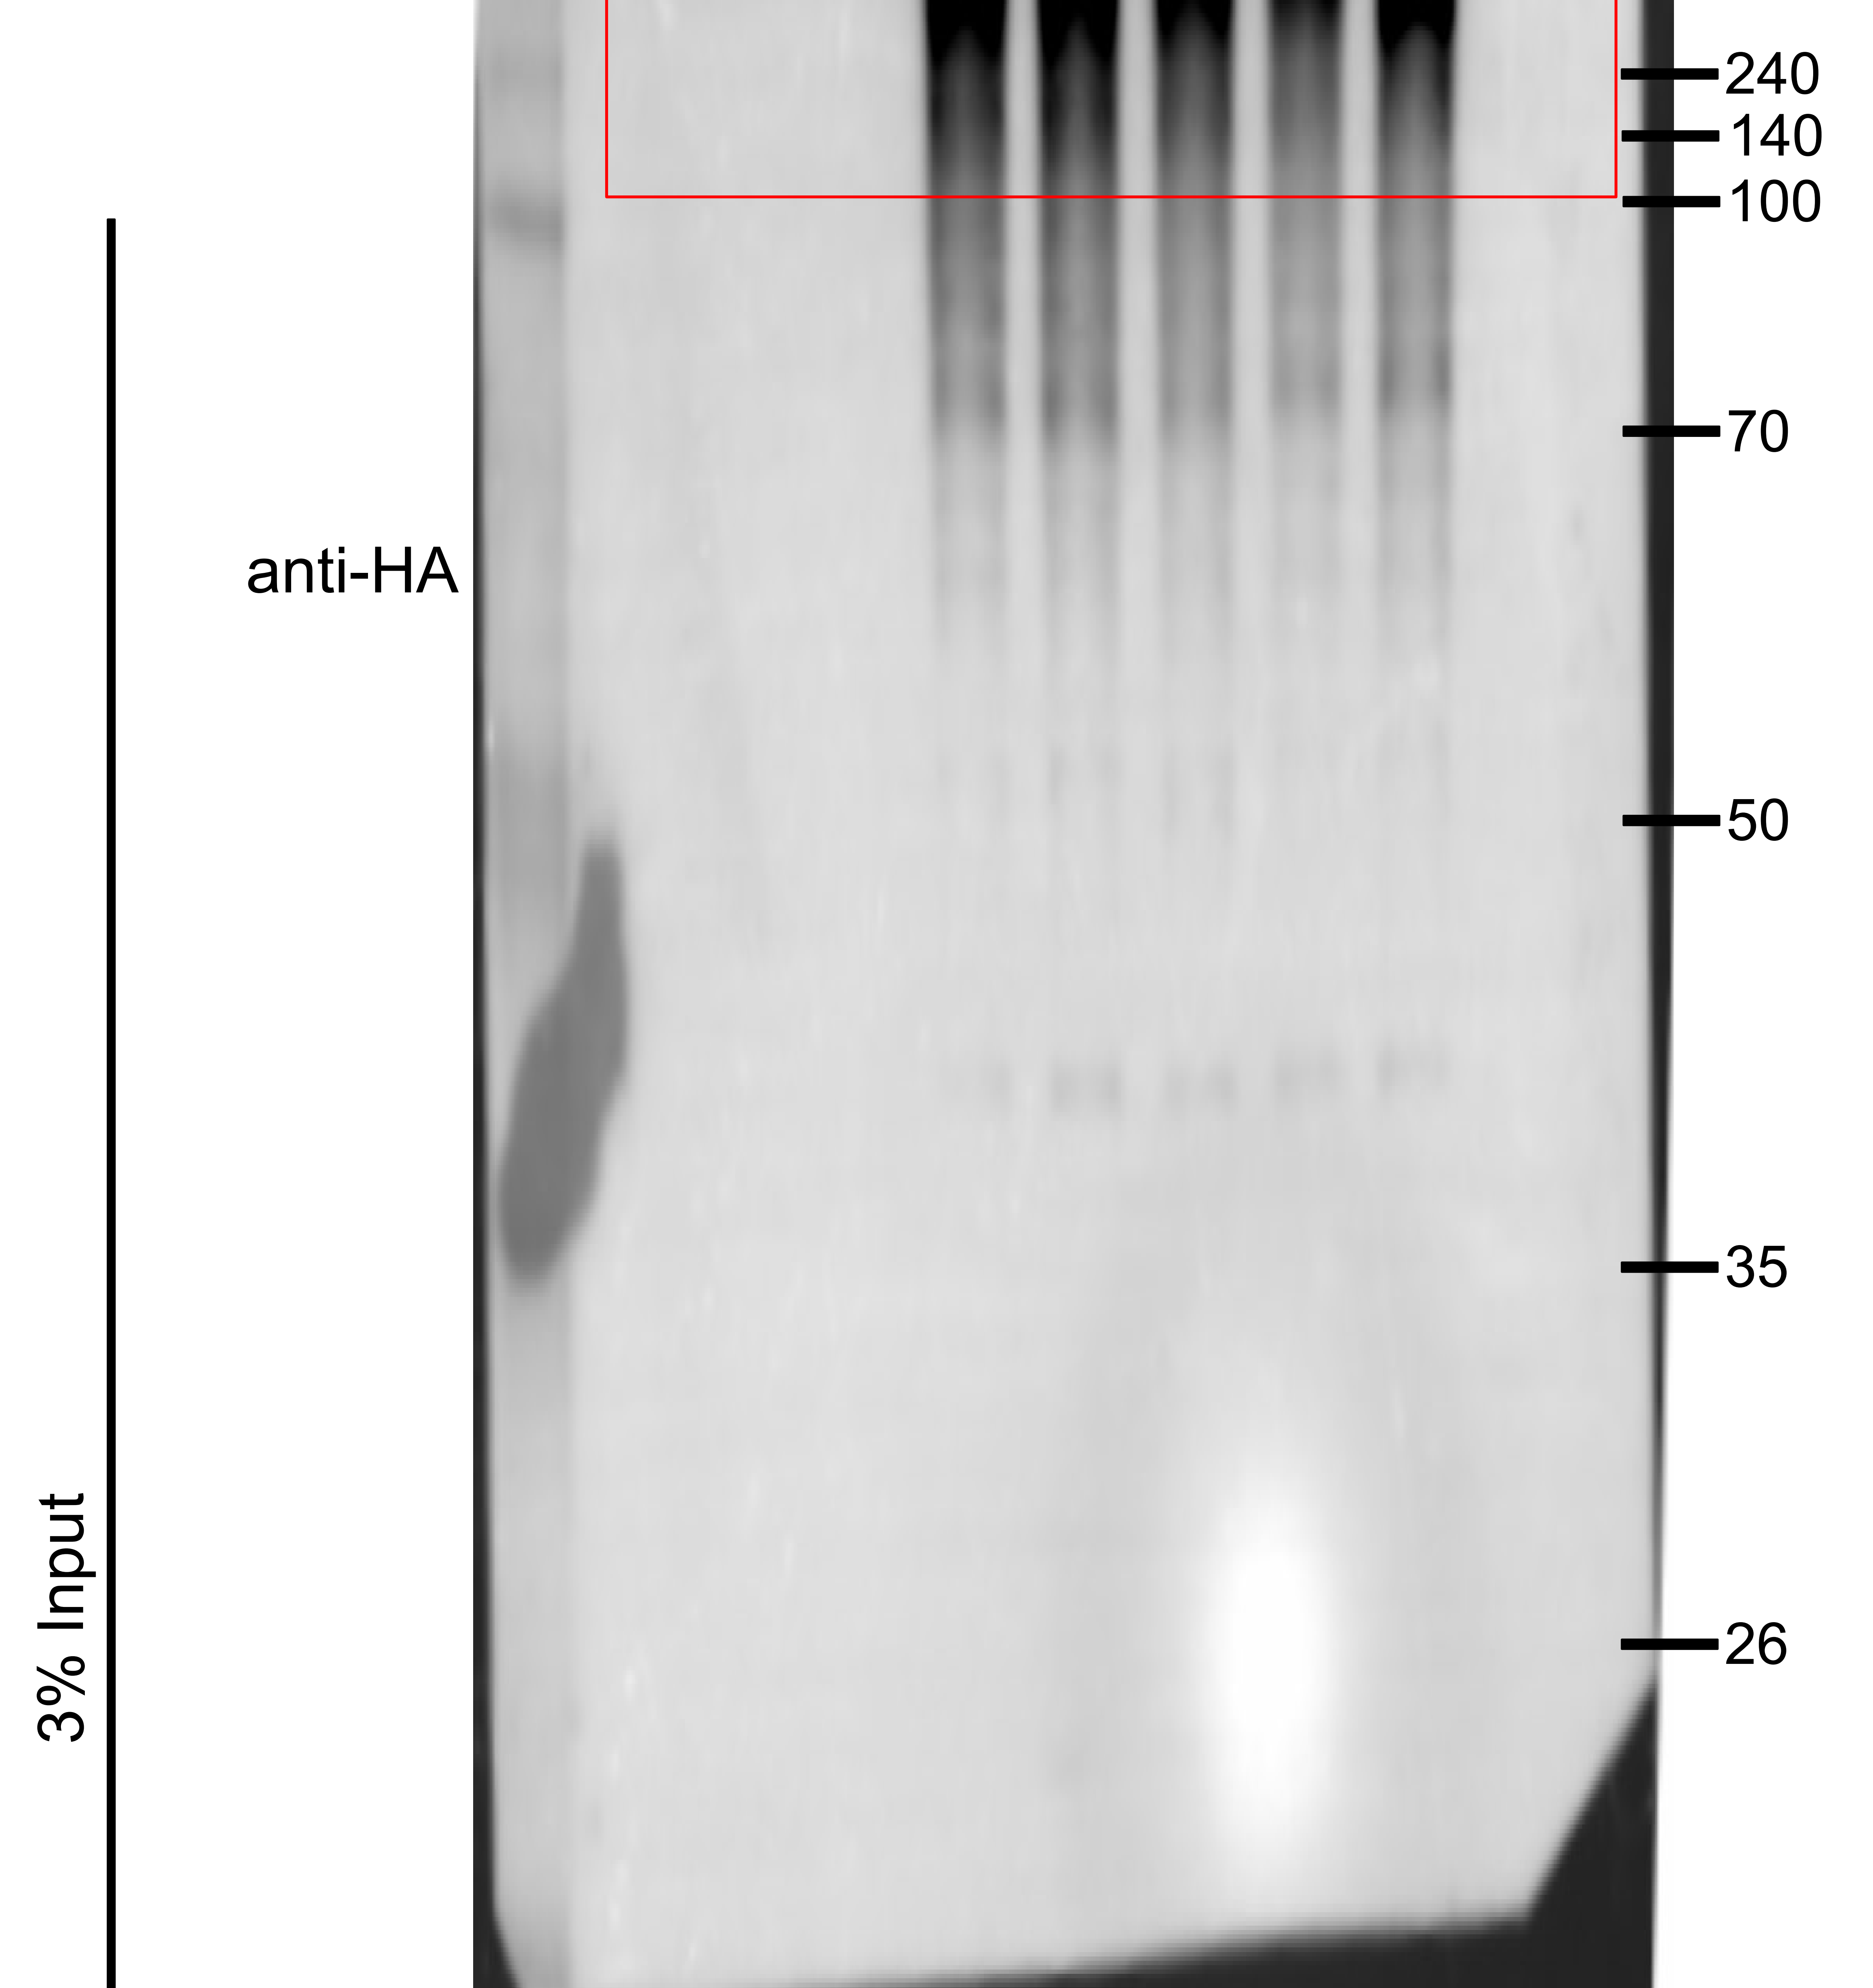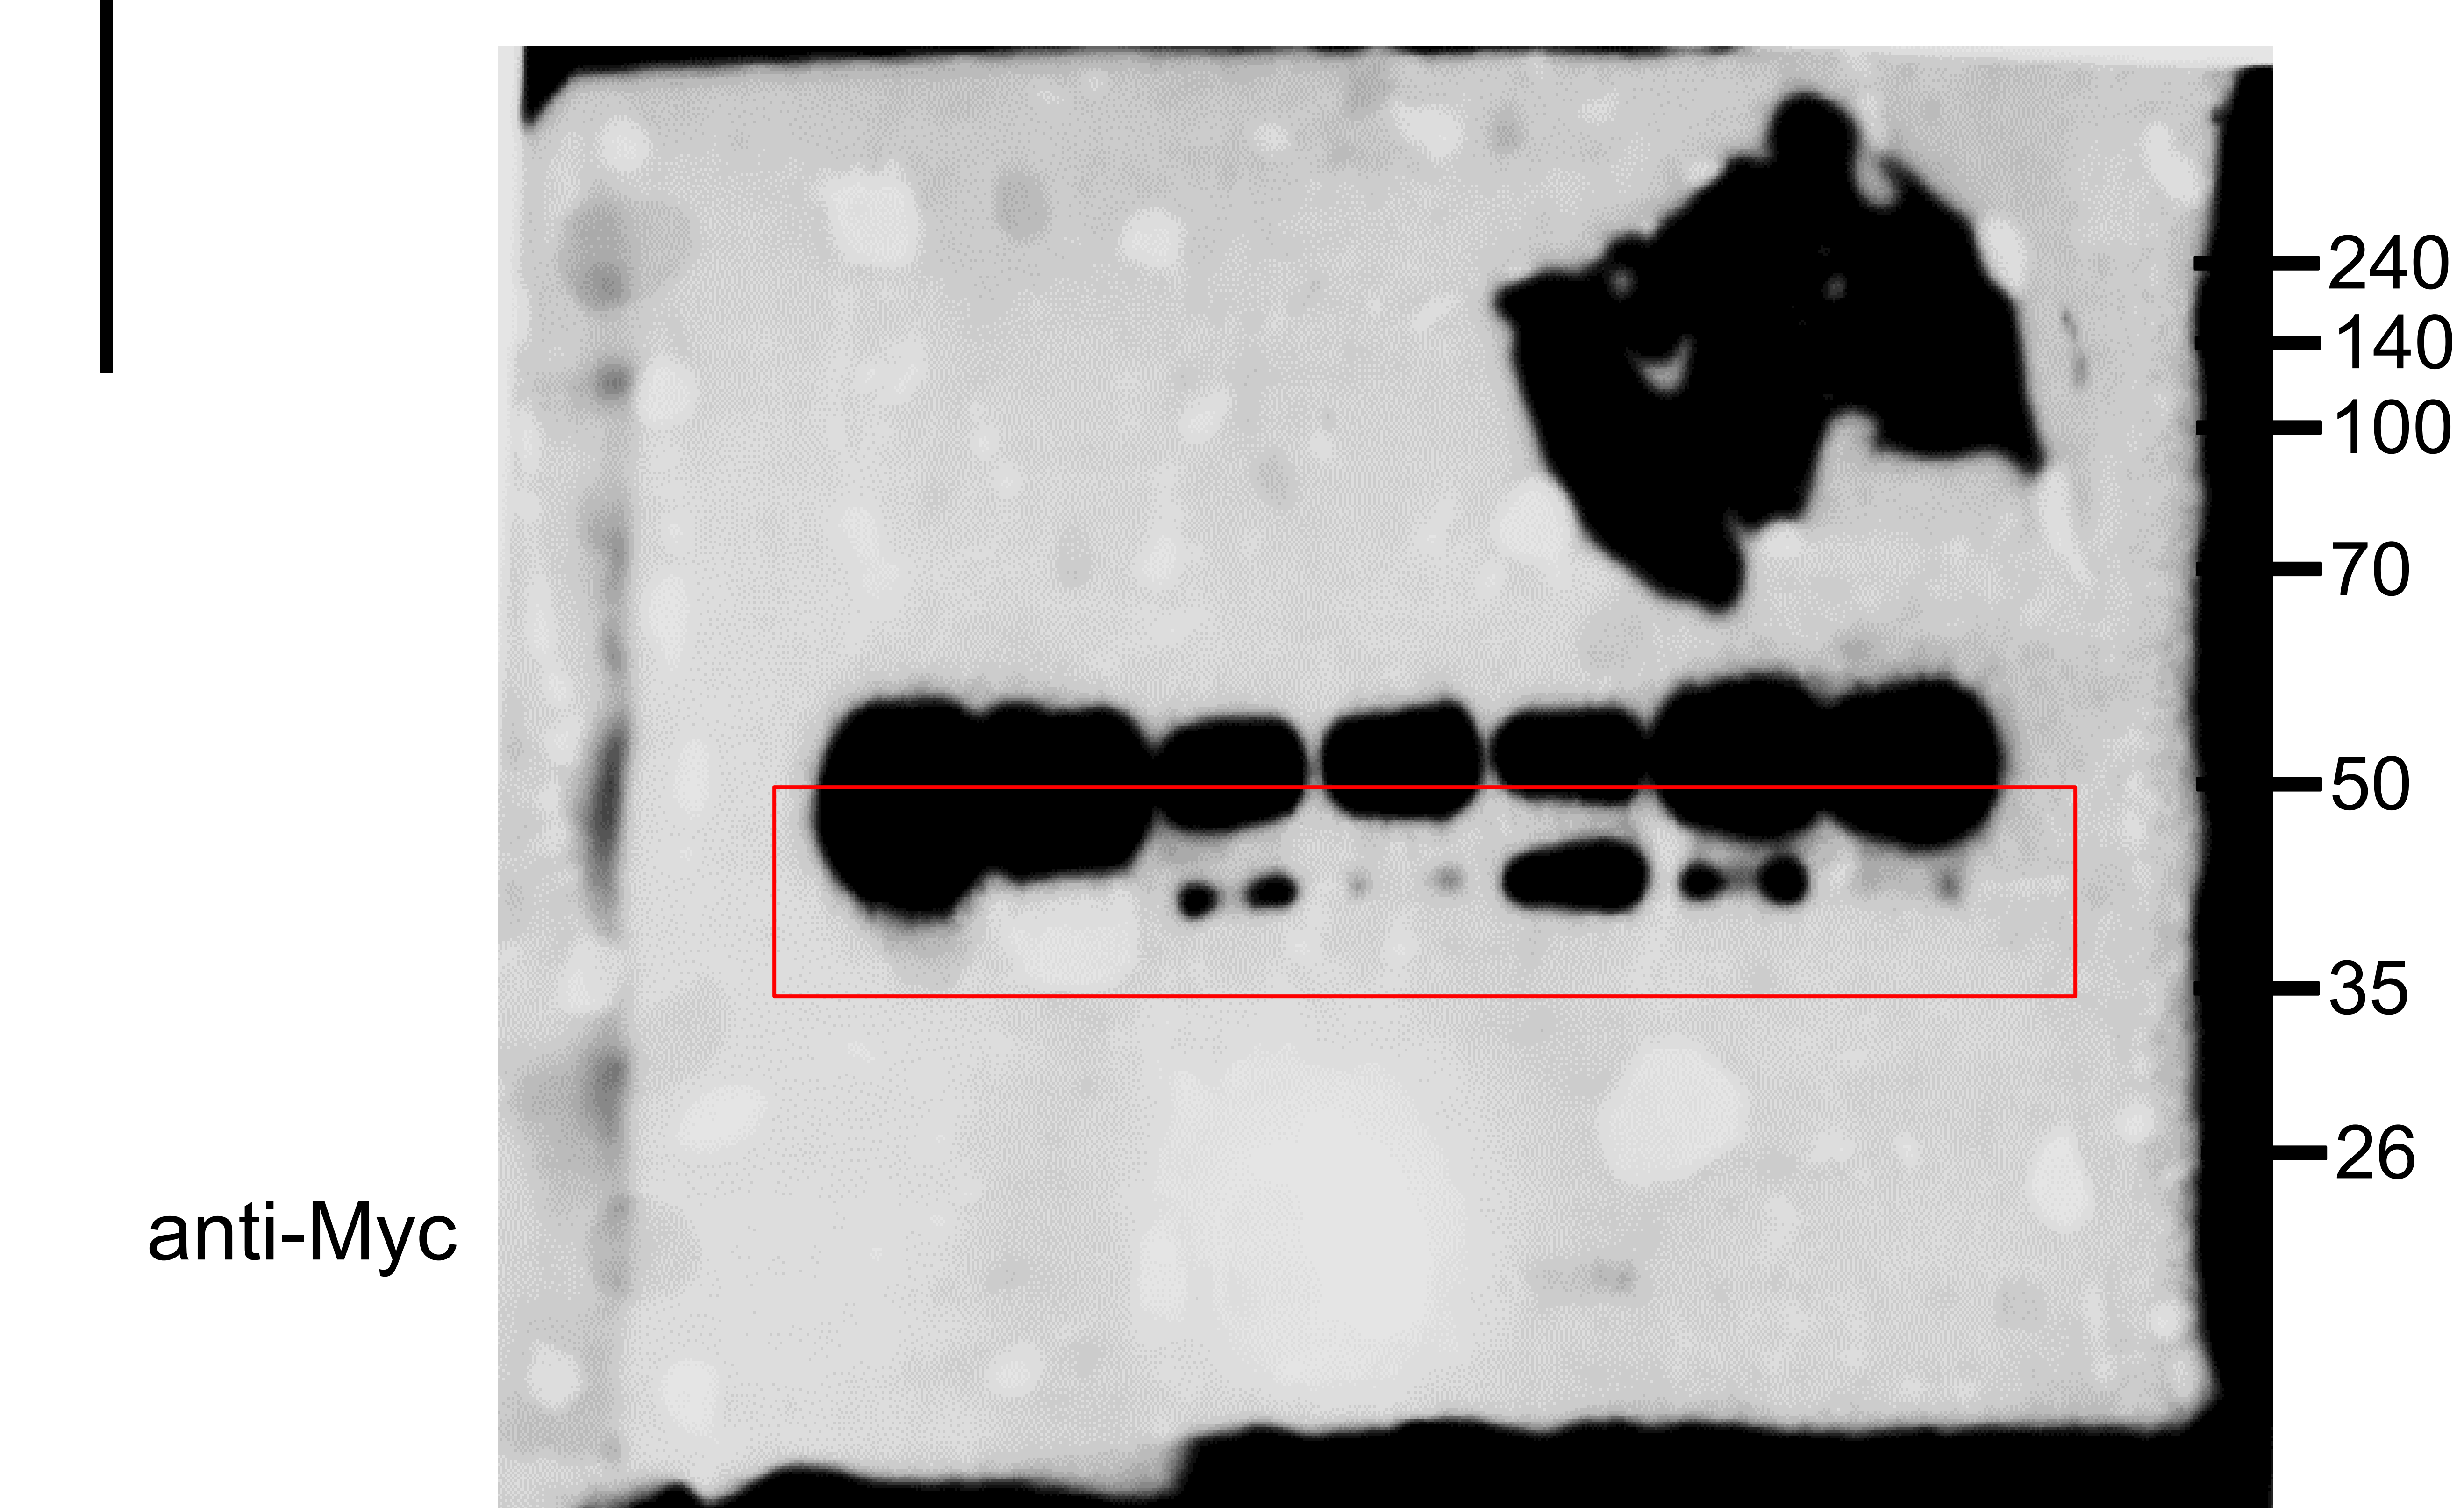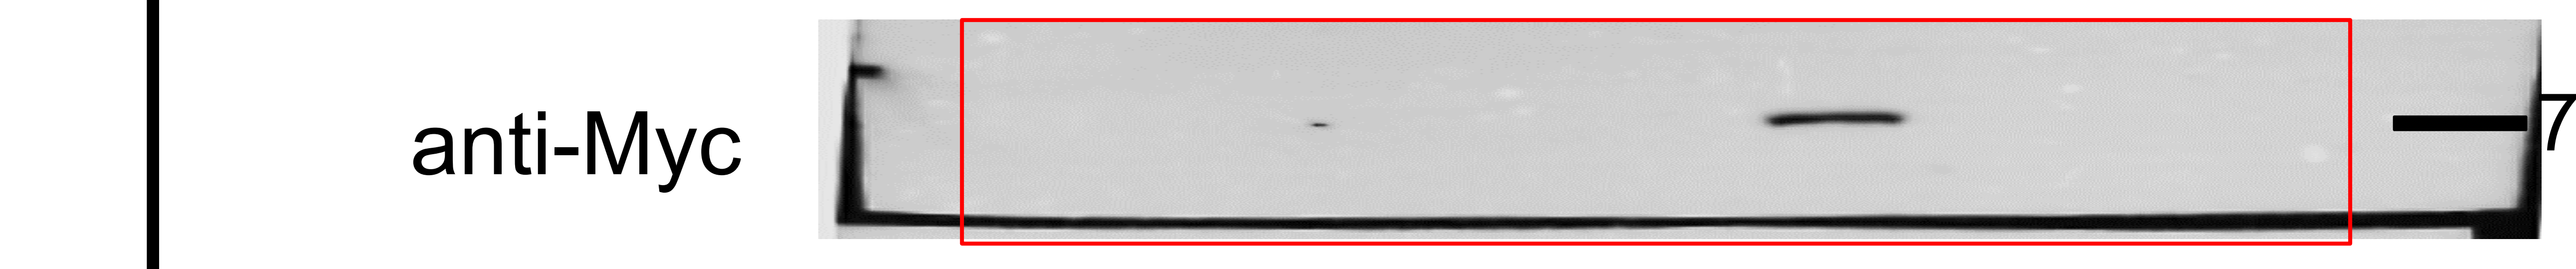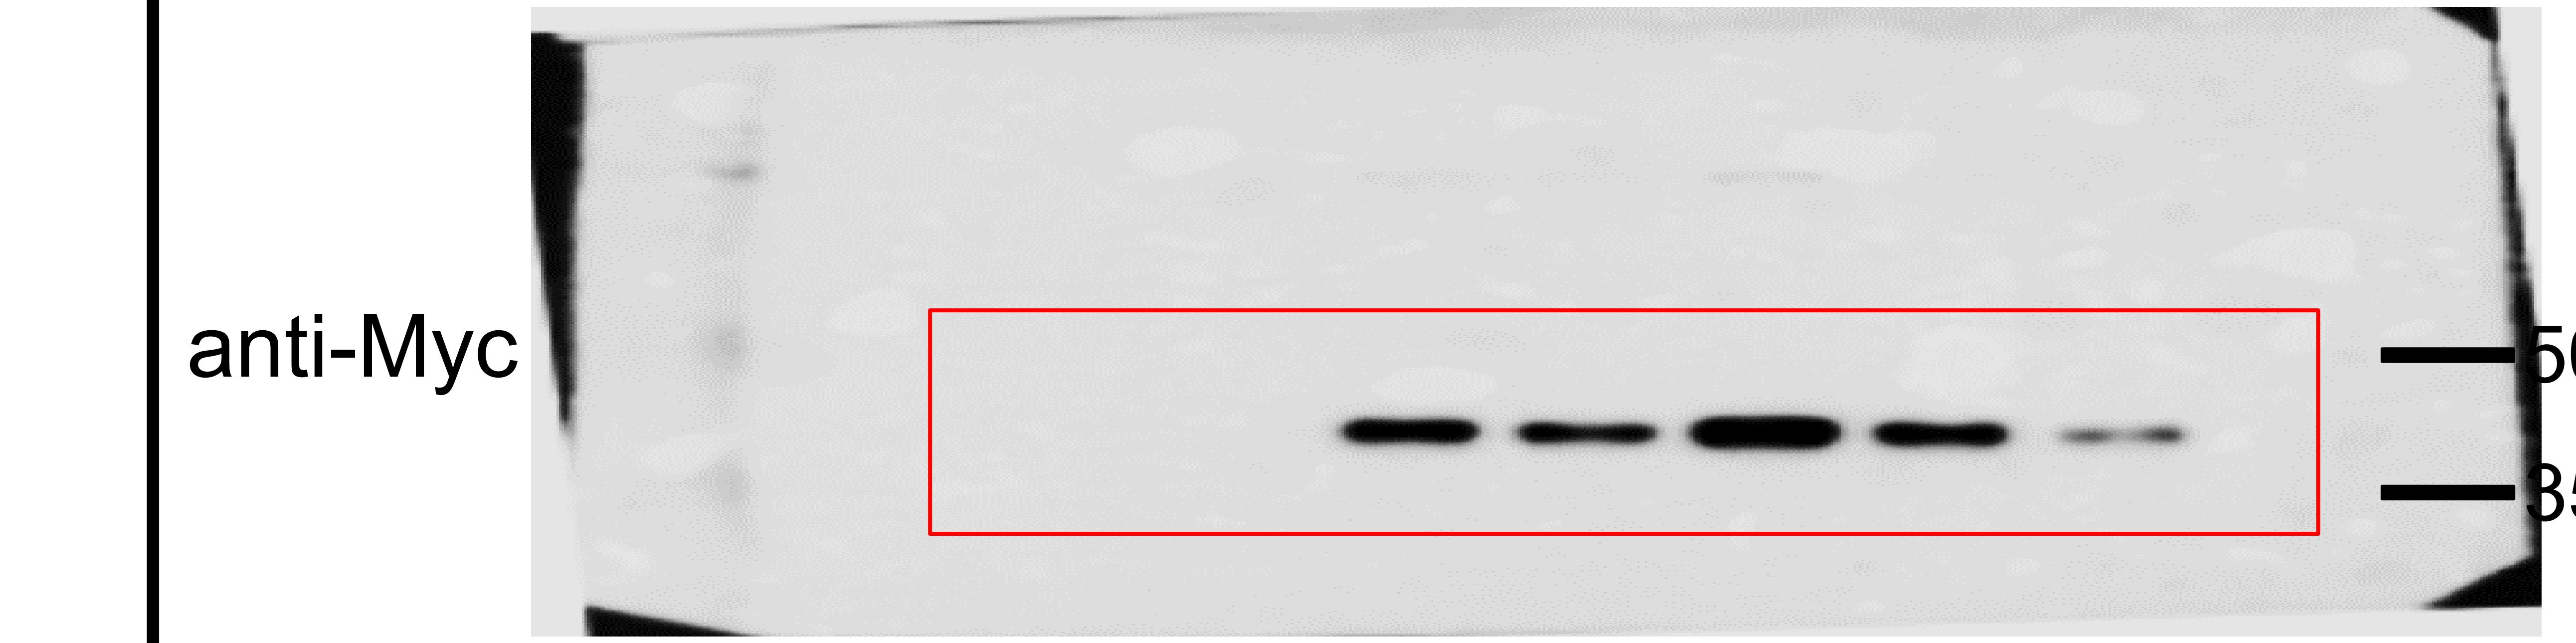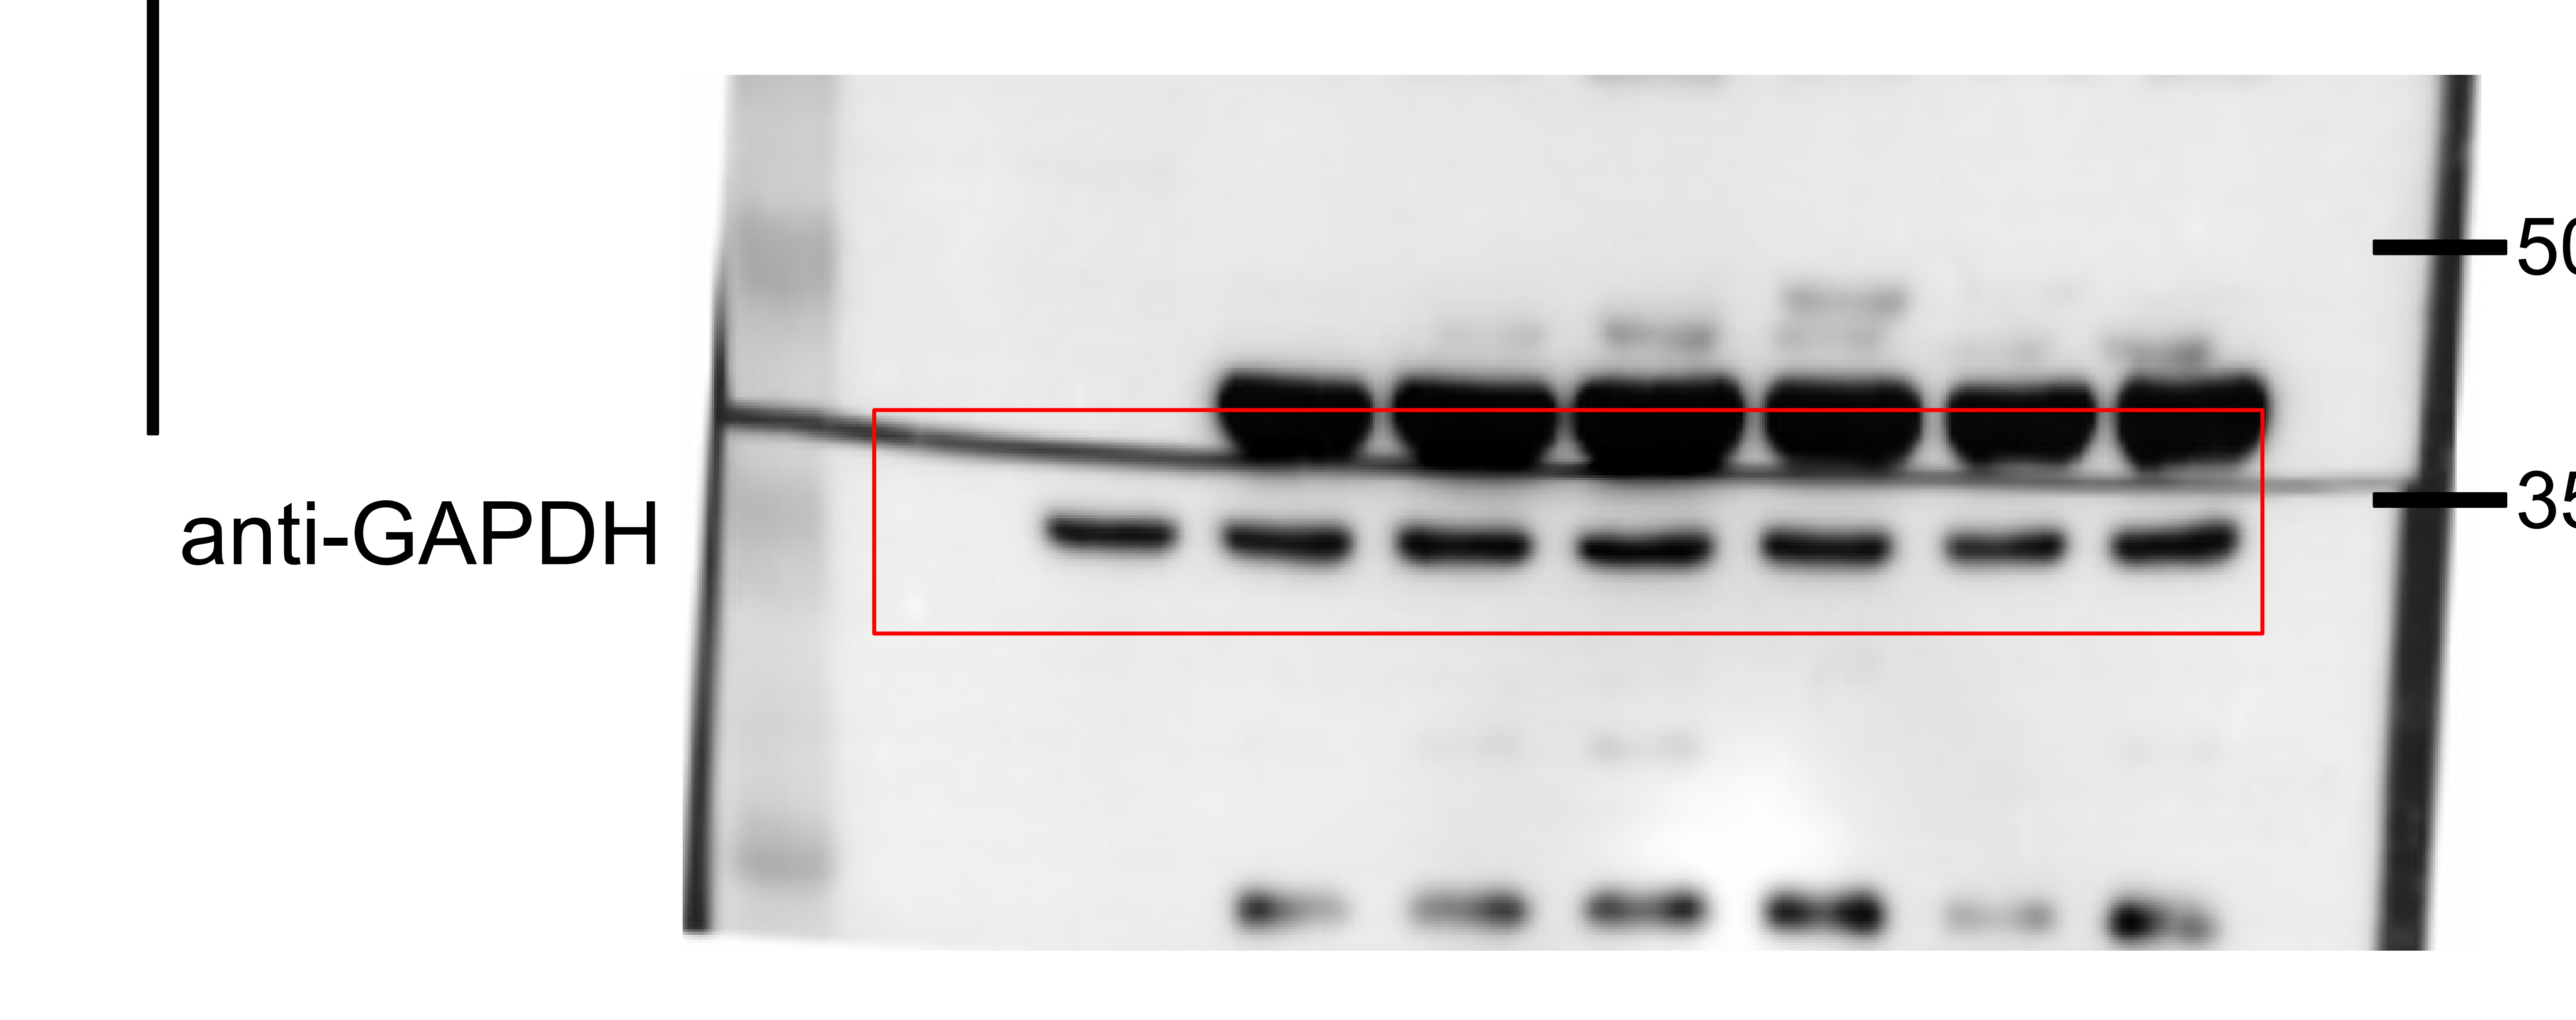

# Uncropped blots of Supplementary Fig. S9

## B

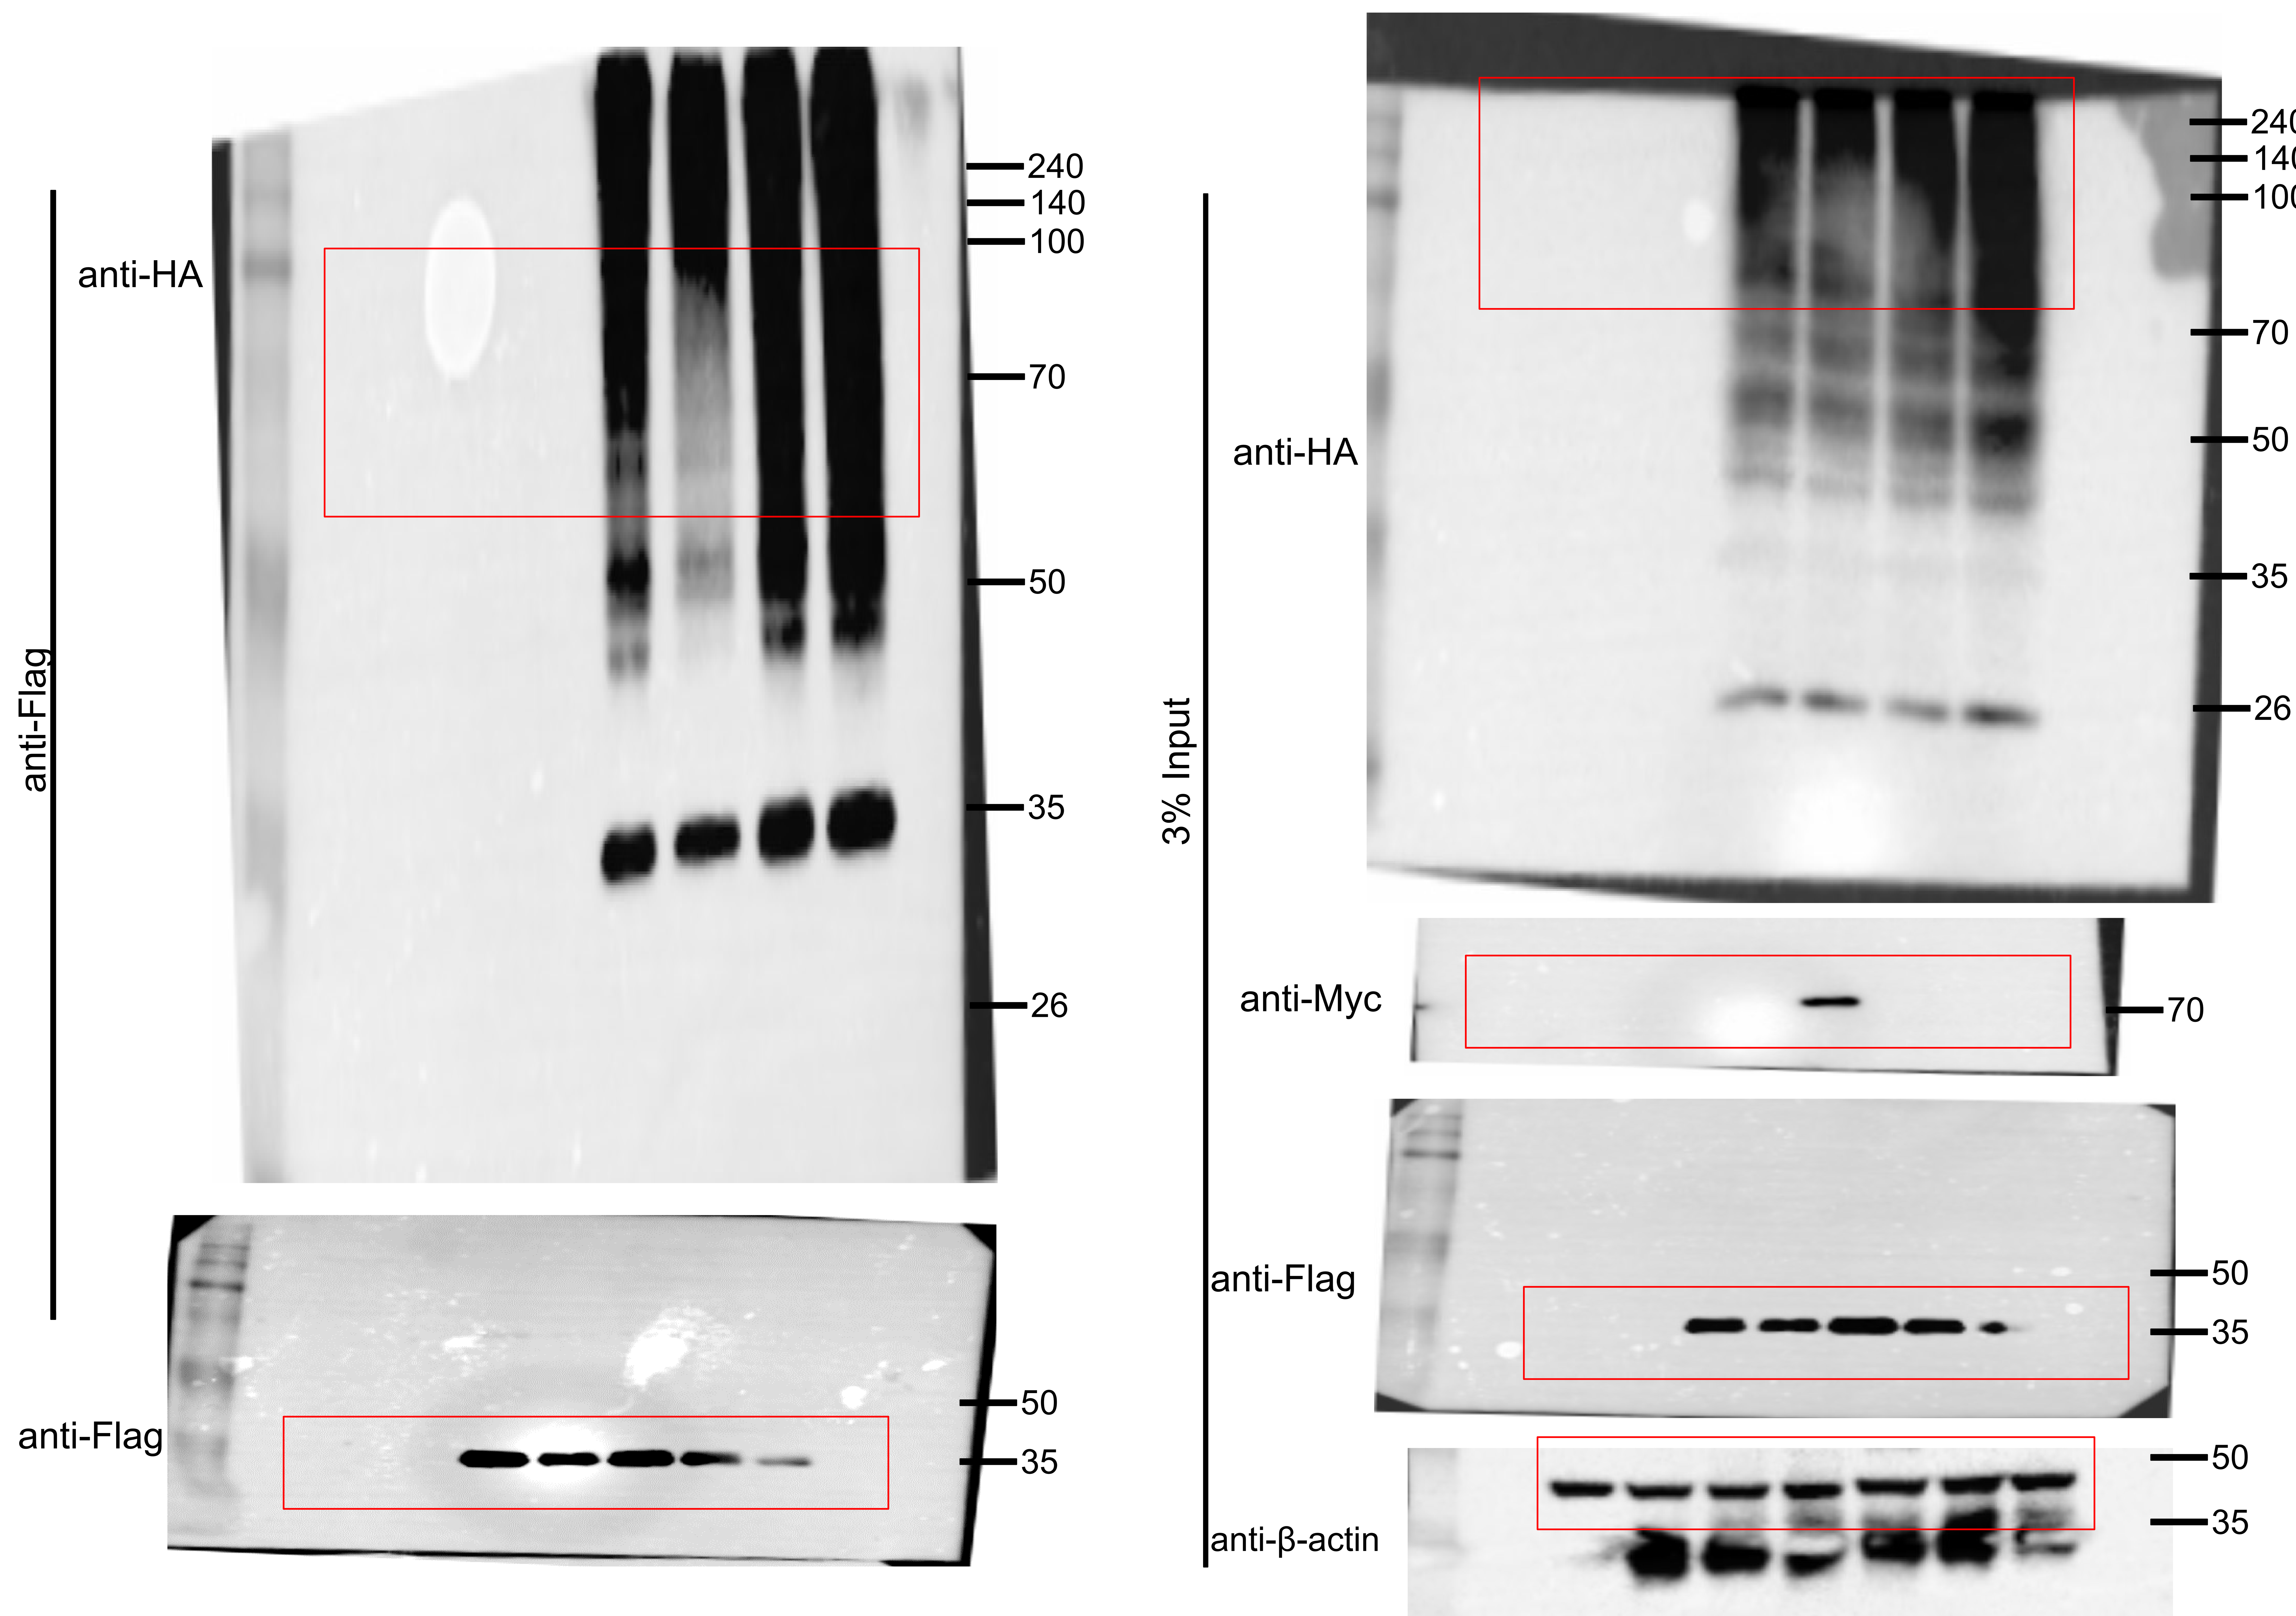

# Uncropped blots of Supplementary Fig. S10

**A**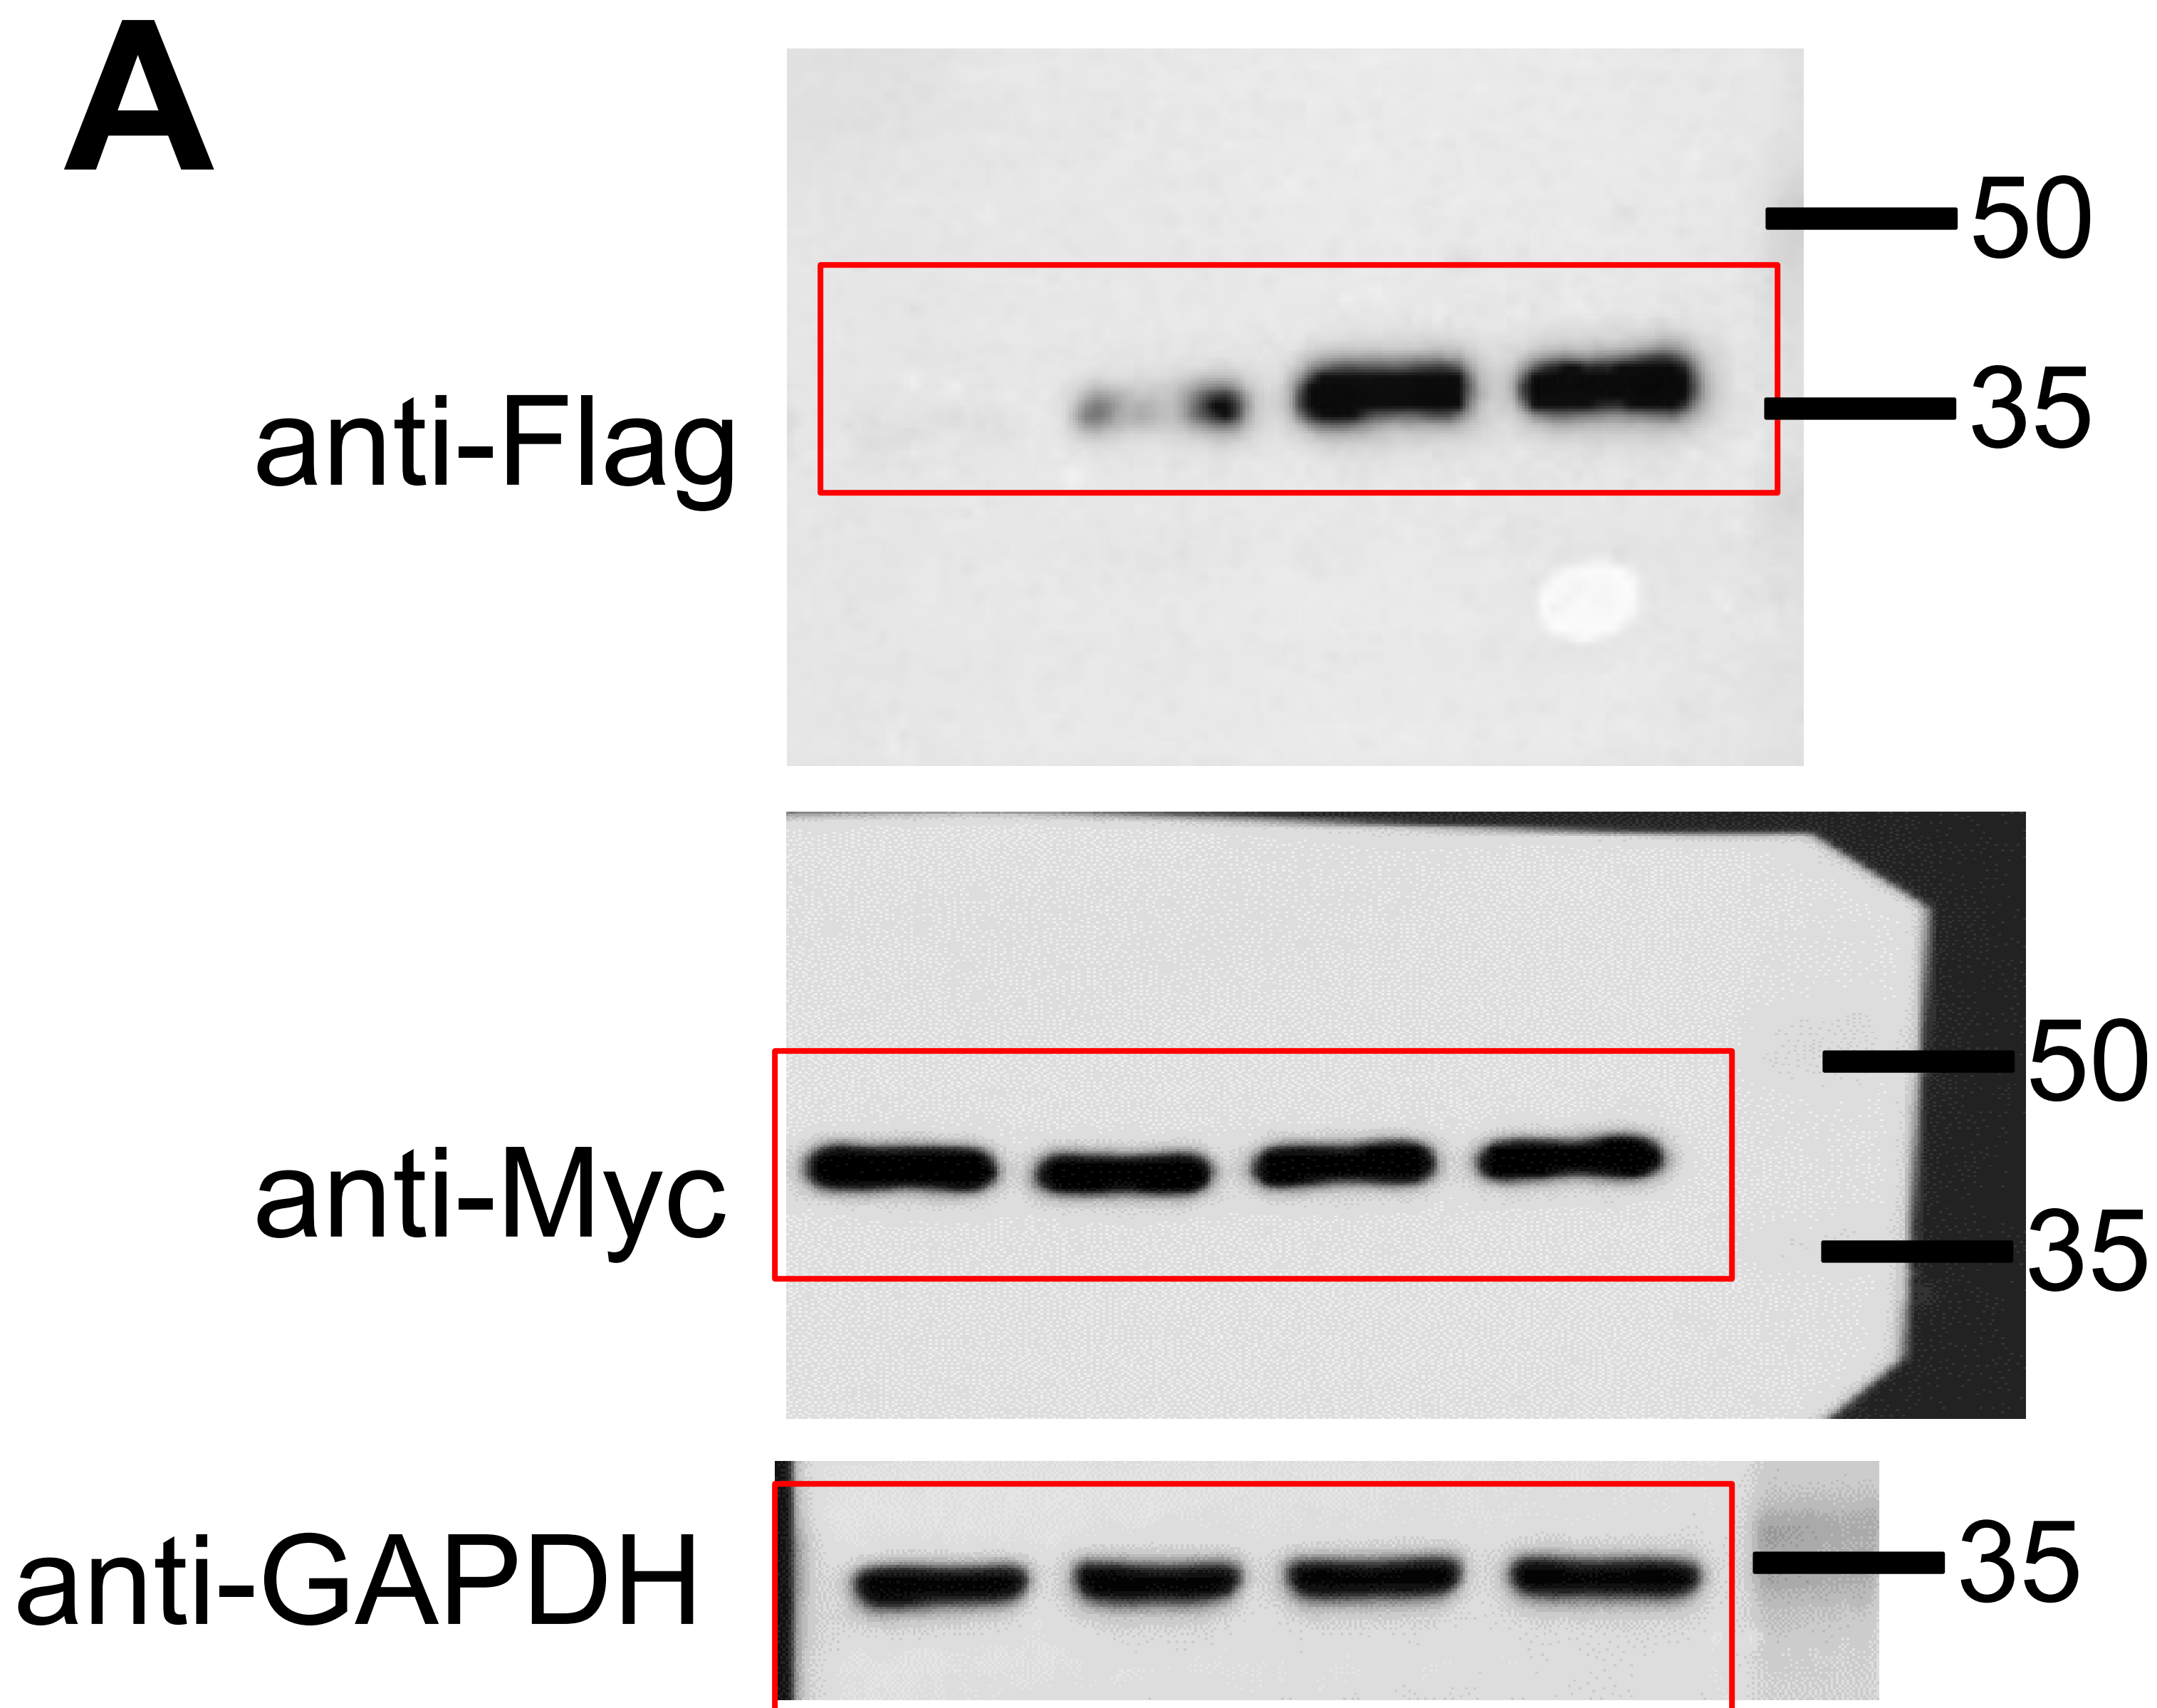**B**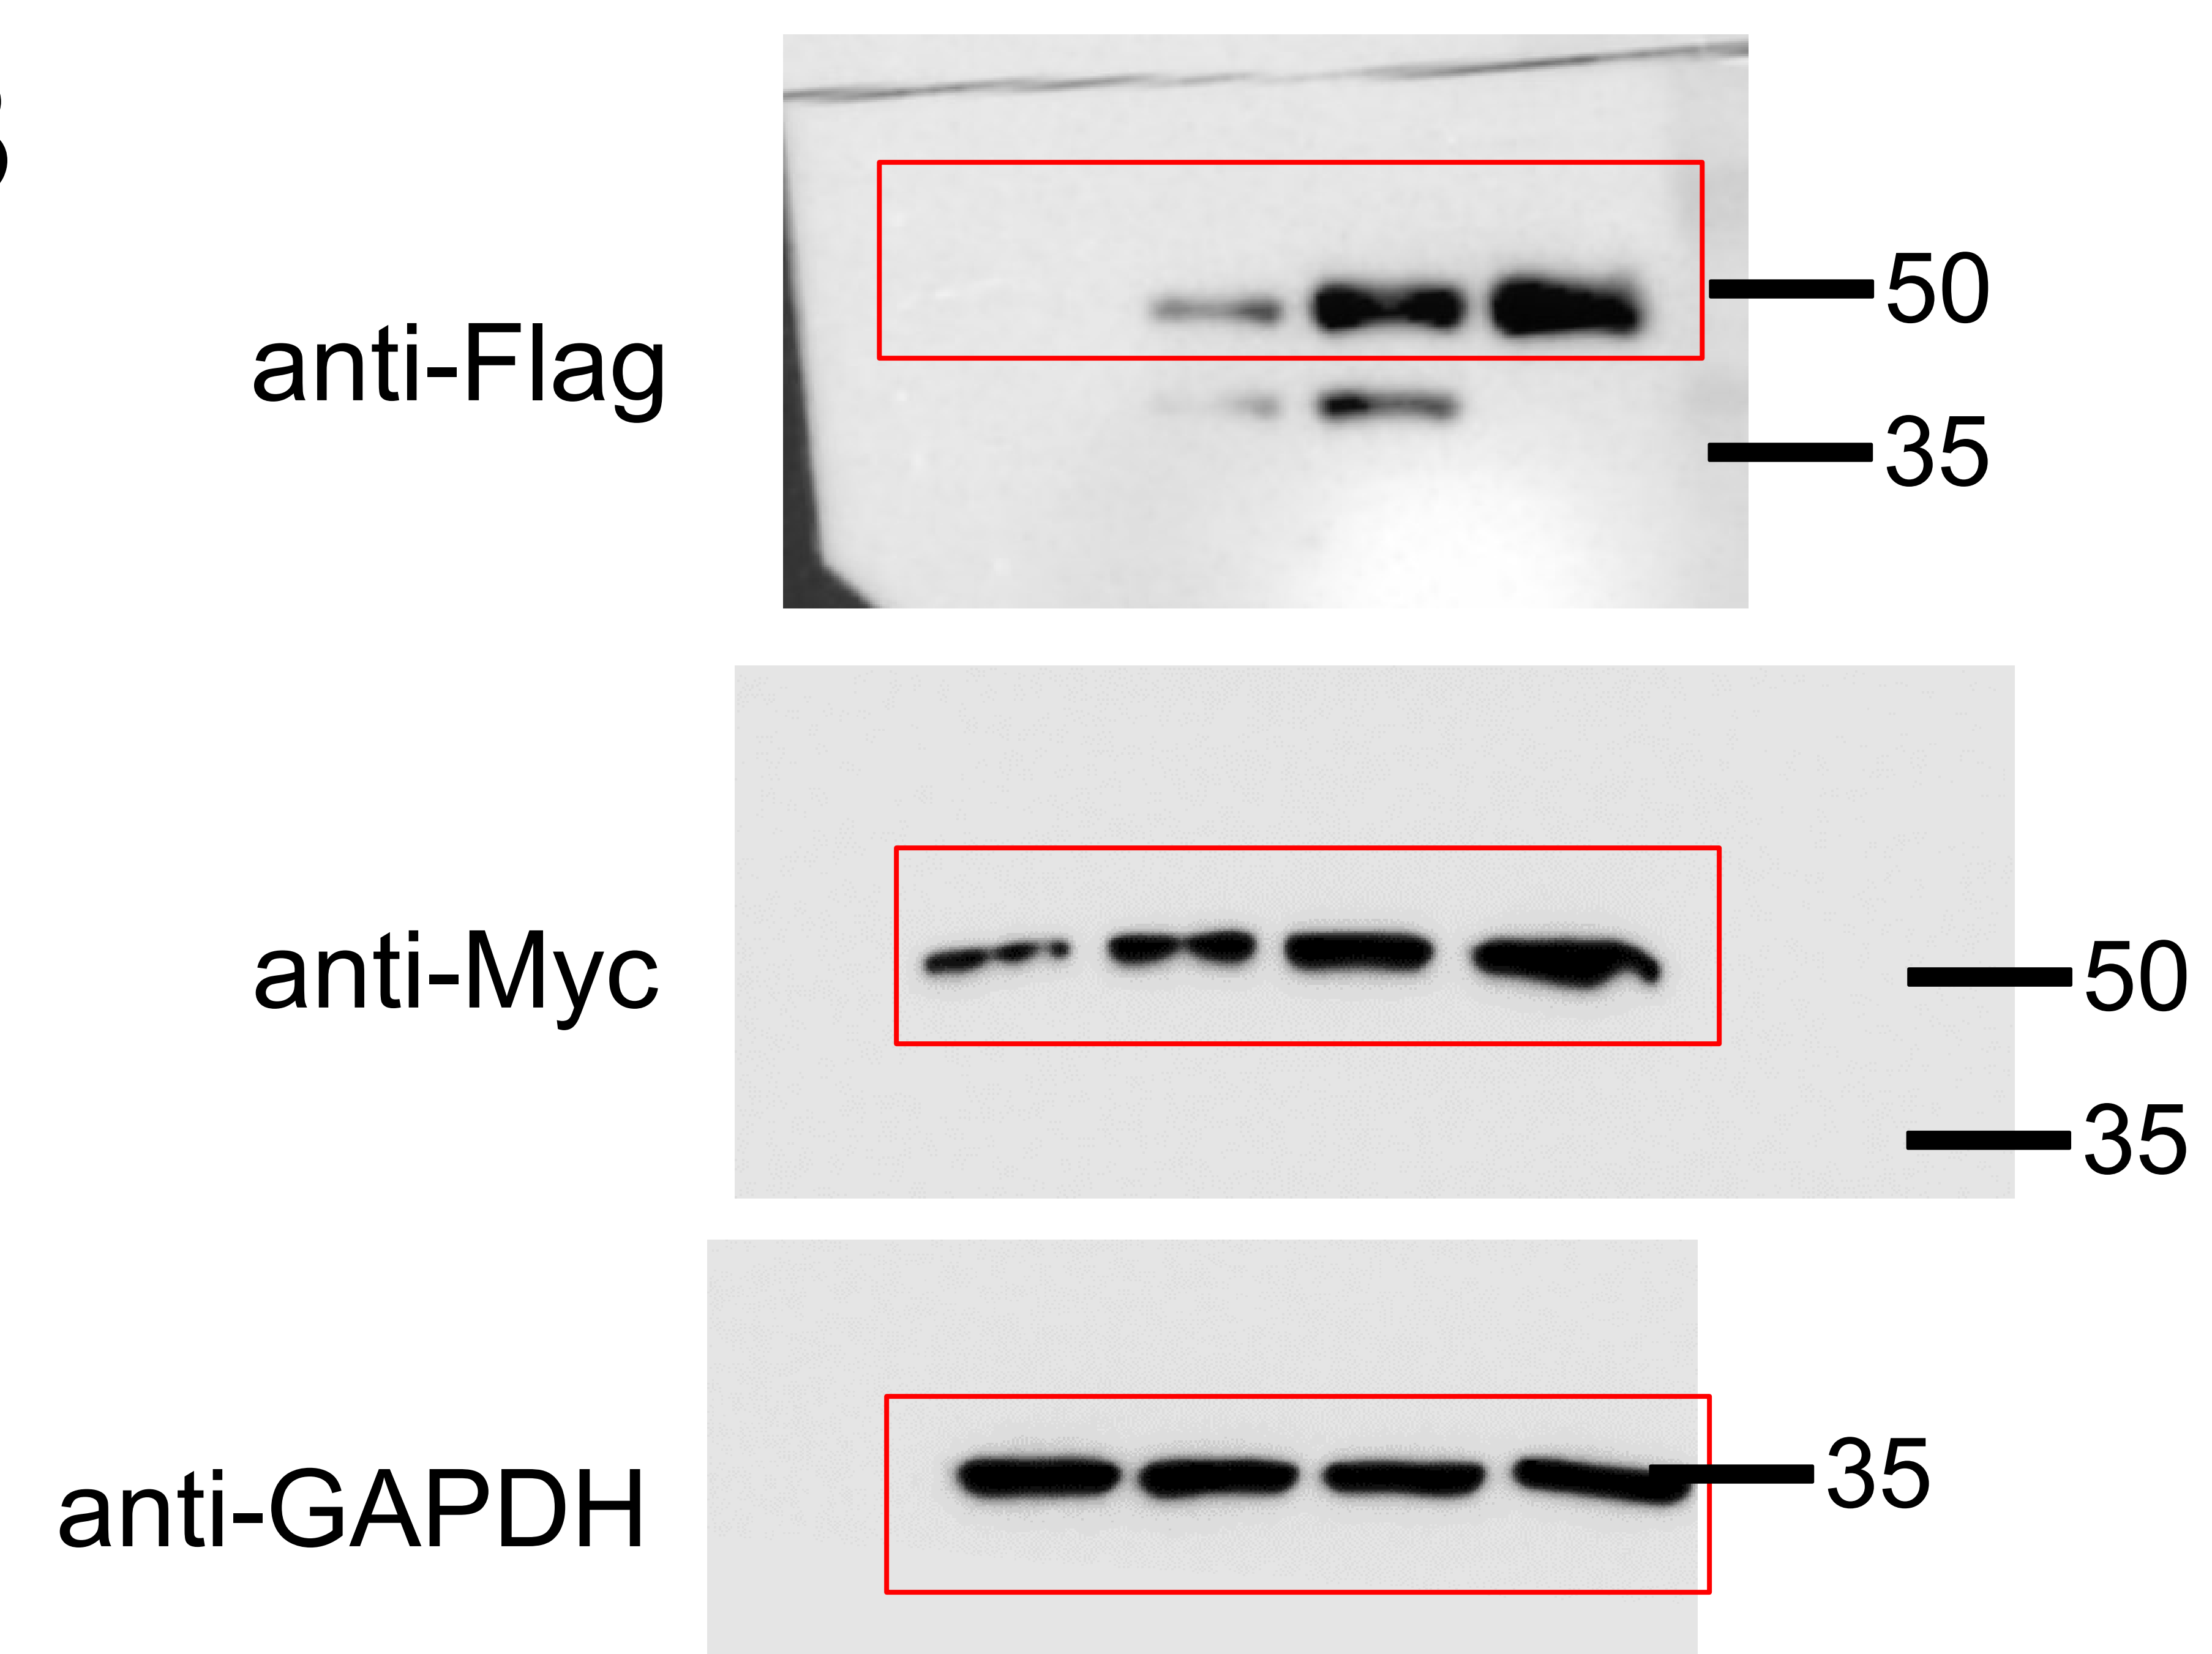**C**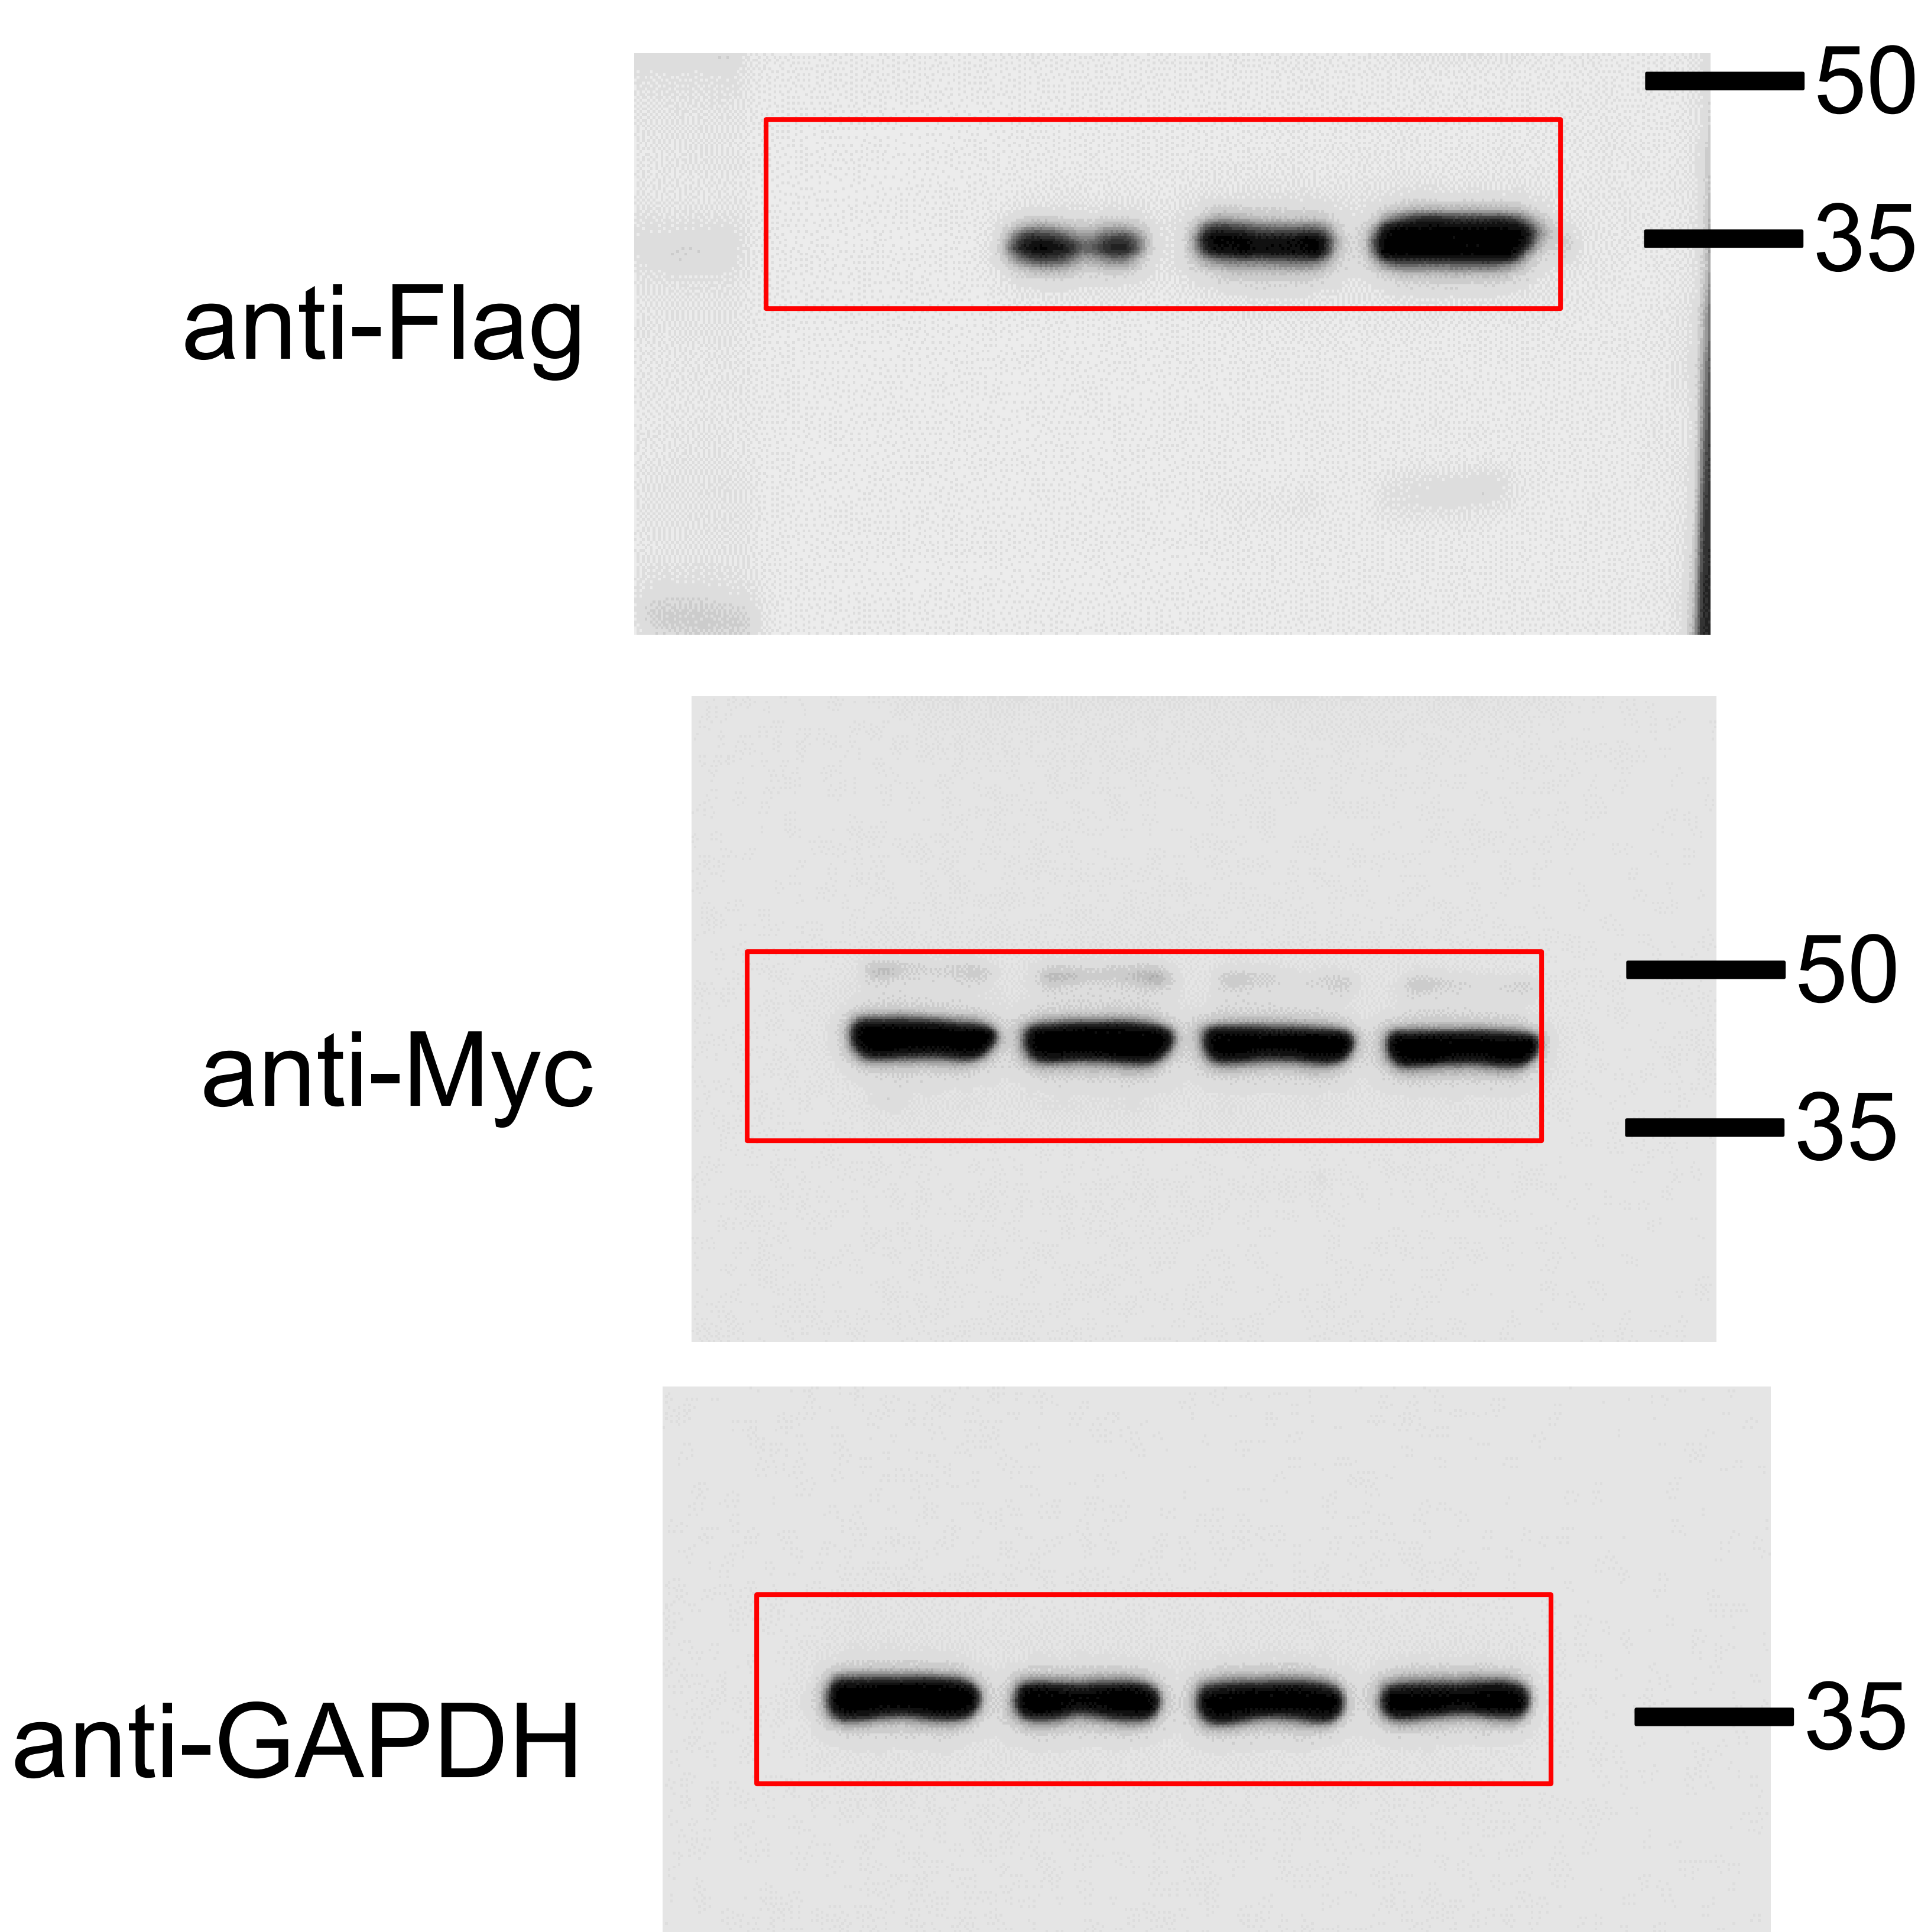**D**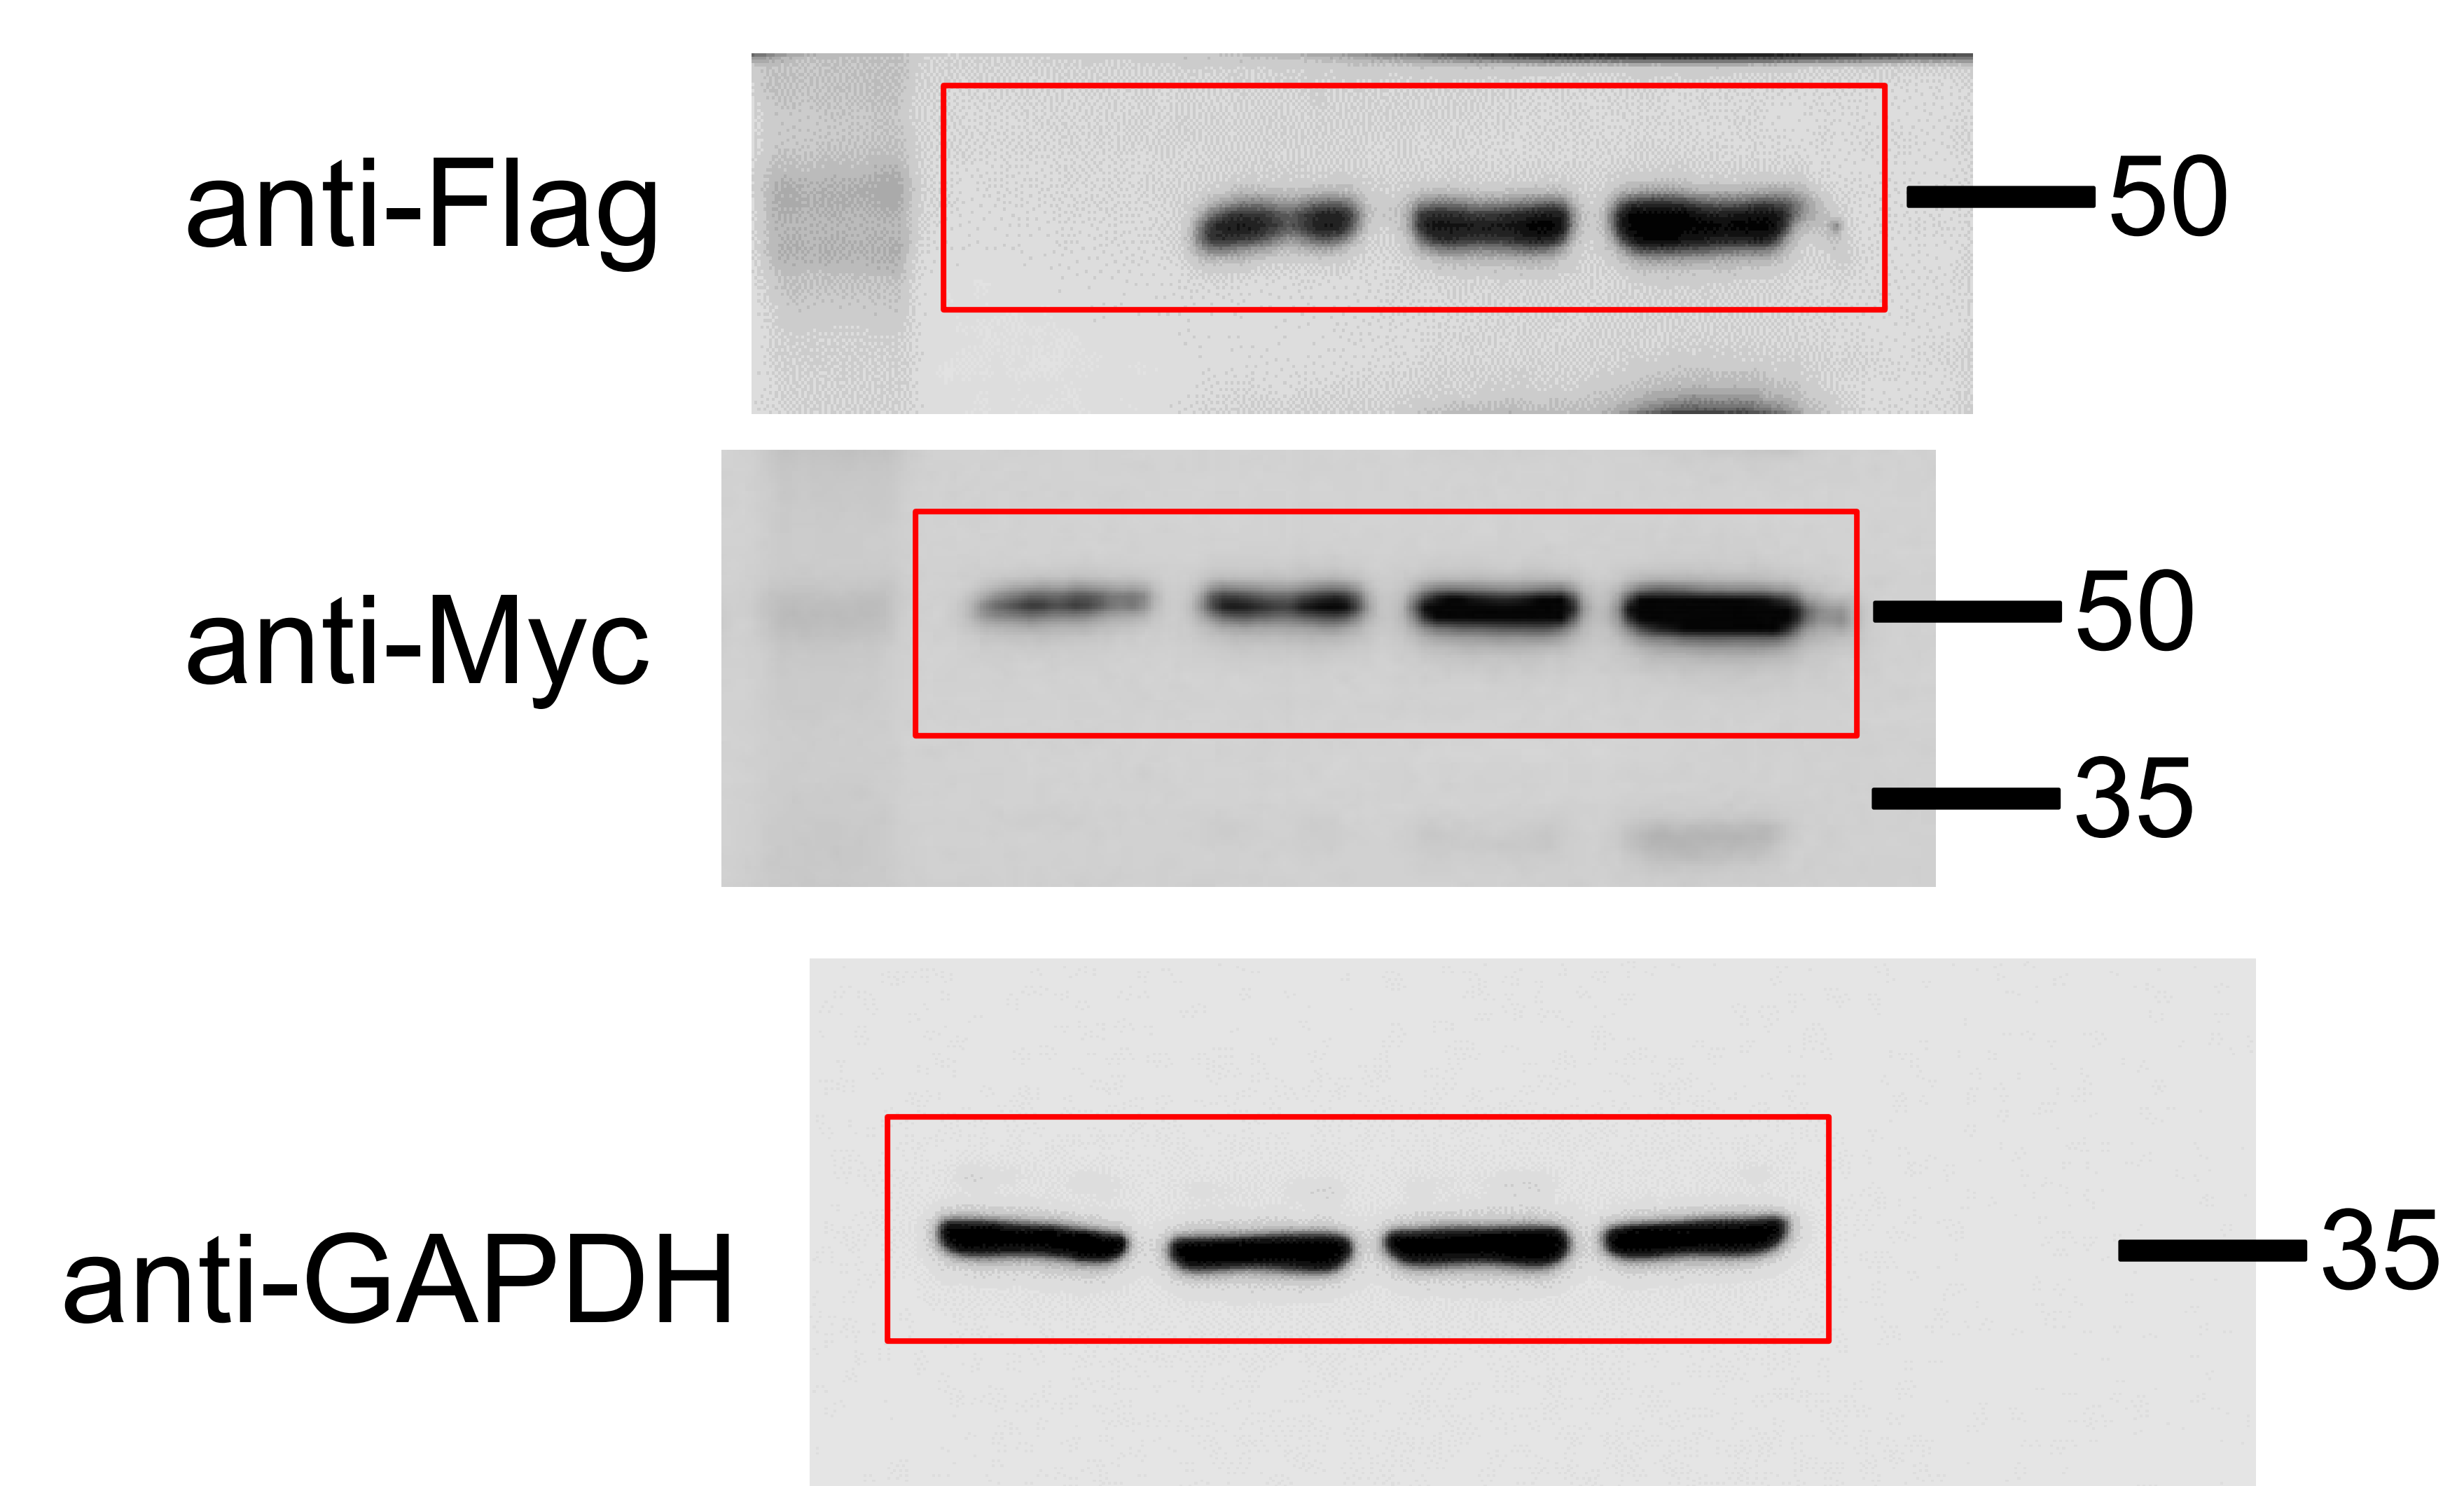

# Uncropped blots of Supplementary Fig. S10

## E

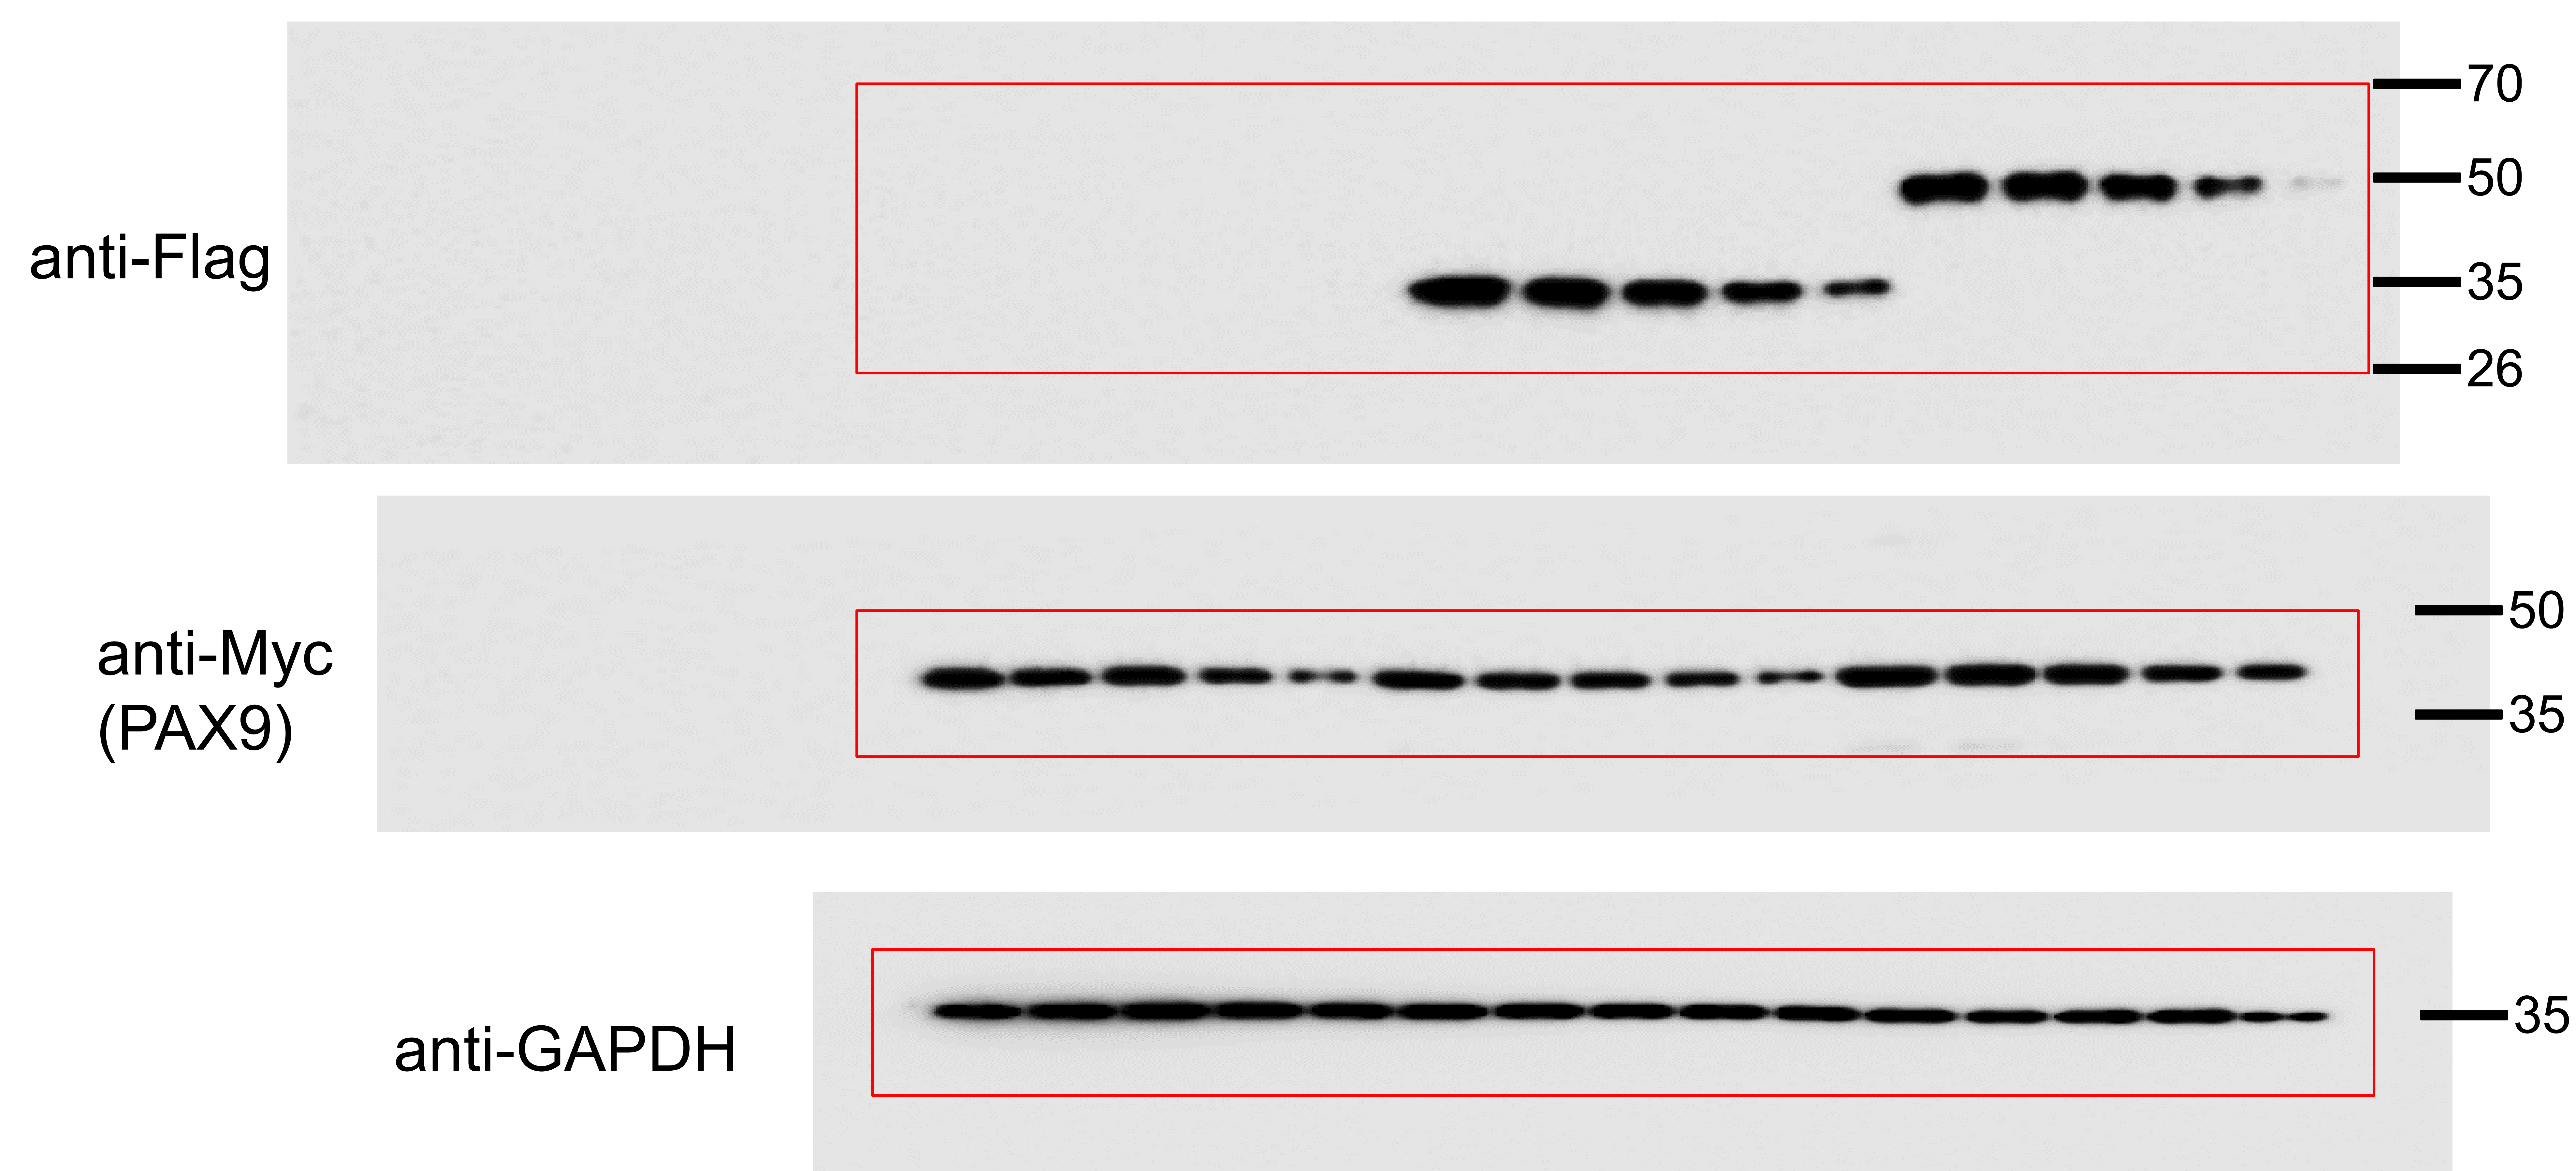

## F

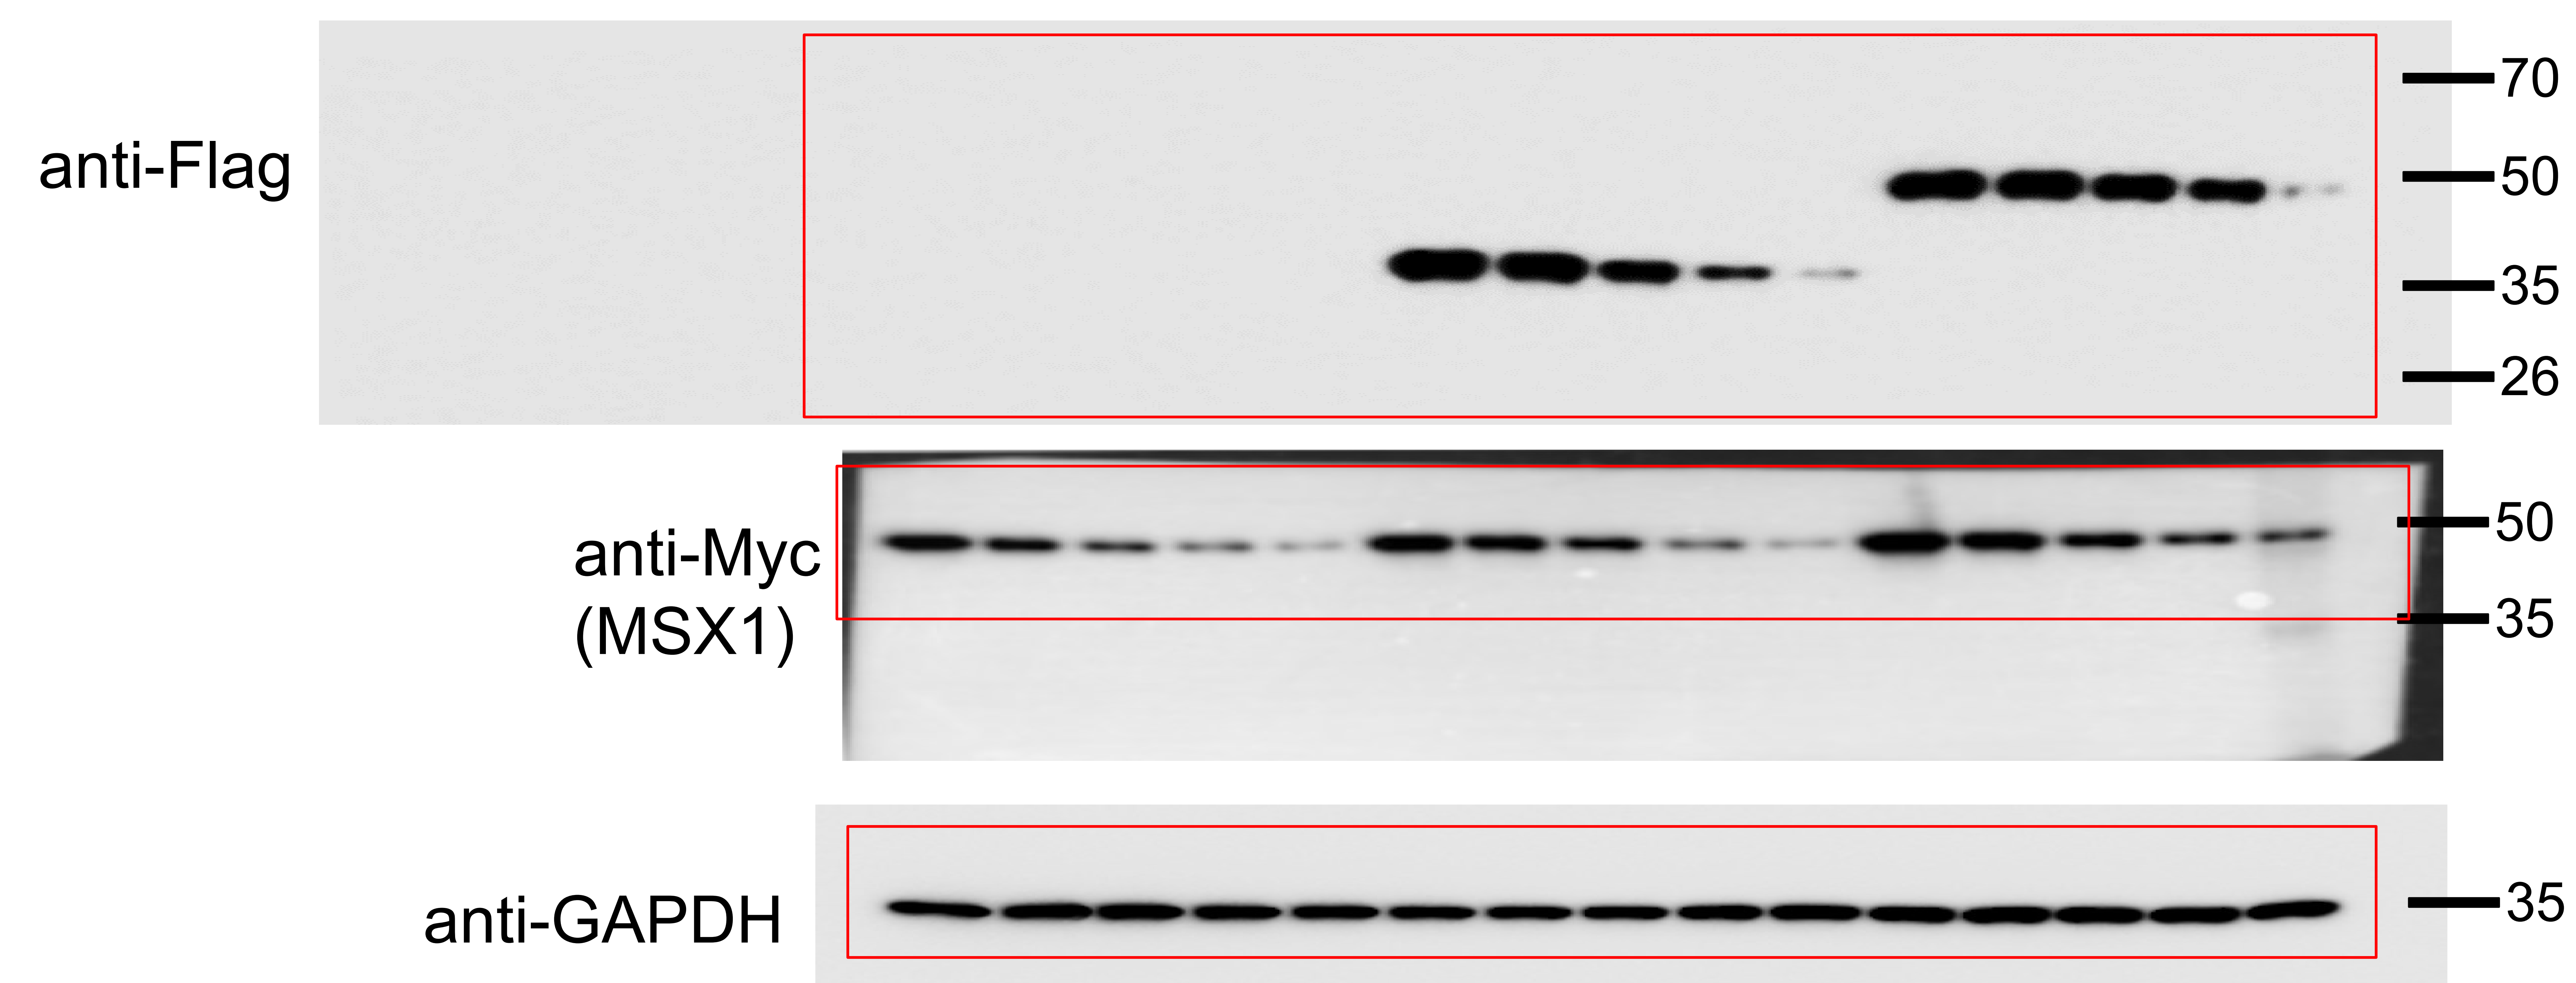

## Uncropped blots of Supplementary Fig. S12

**C**

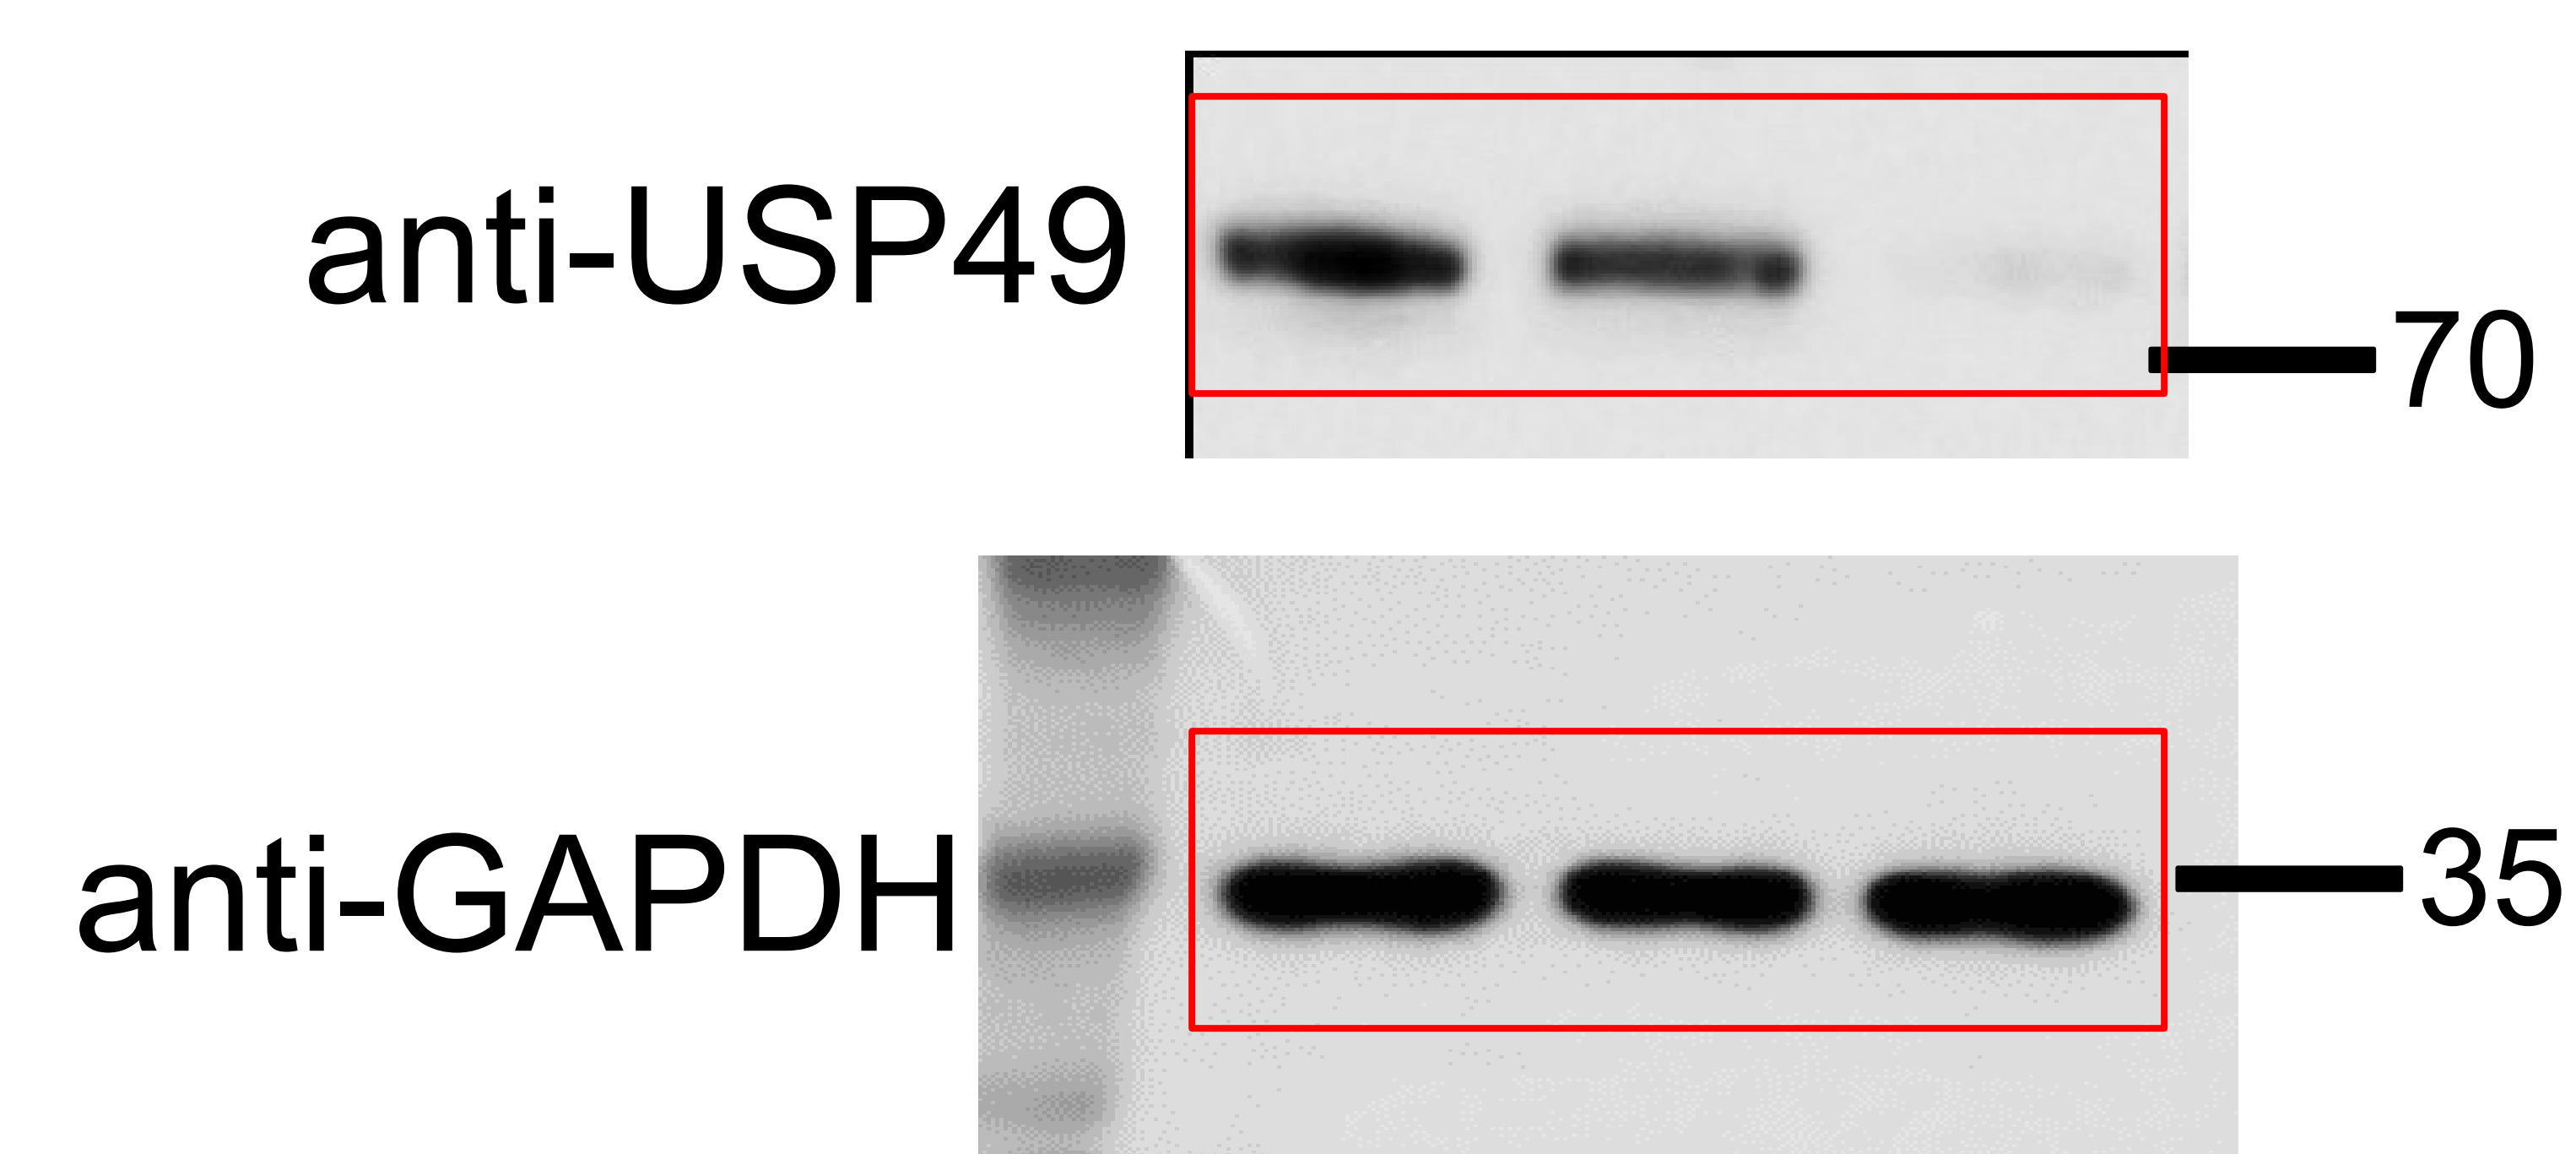

## Uncropped blots of Supplementary Fig. S14

**D**

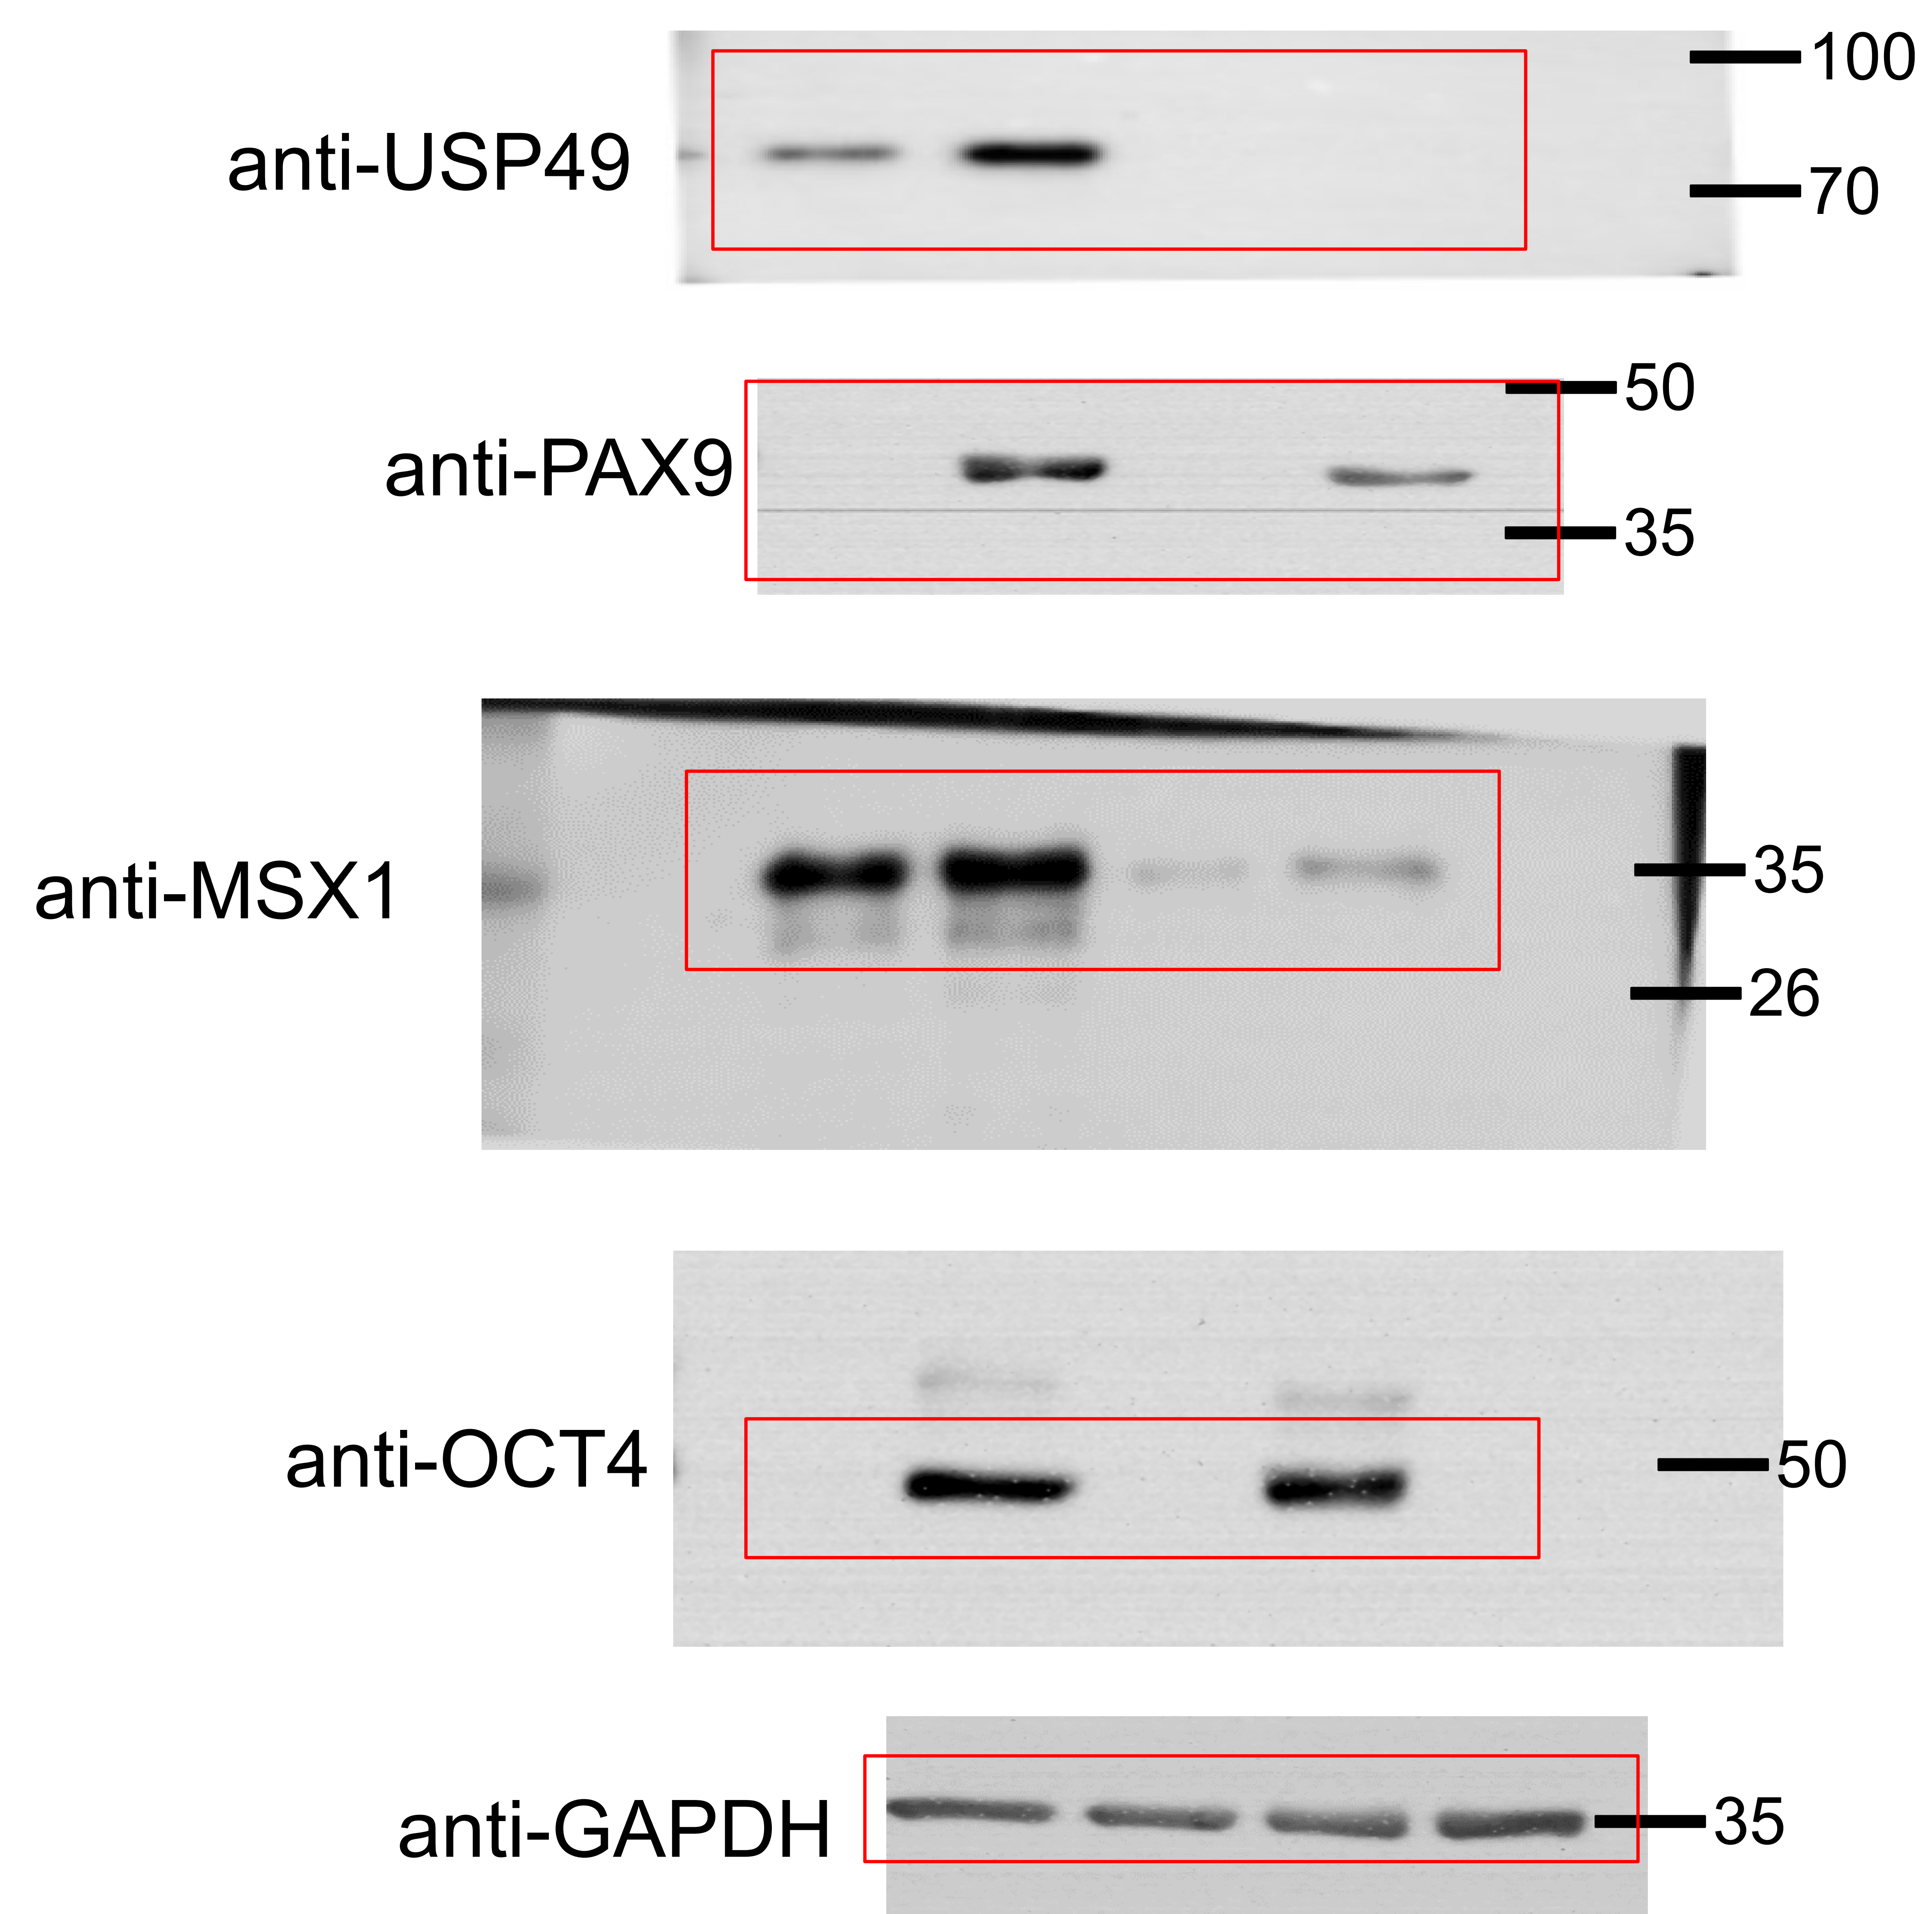

Supplement: 41418_2022_956_MOESM4_ESM.pdf [file 41418_2022_956_MOESM4_ESM.pdf]
